# Supplementary material for: Full-length RNA transcript sequencing traces brain isoform diversity in house mouse natural populations
Source: HighWire-hosted journal article supplement (doi:10.1101/gr.279166.124), 2024-09-17
Supplement: Supplemental_Data_S1.xlsx [file Supplemental_Data_S1.xlsx]

## Sheet: Data S1A
Supplemental Data S1A Summary of sequencing statistics for the optimization experiment
Project ID	Species	Subspecies	Population (Geographic region)	Internal ID	Sex	Extracted organ	ENA sample accession	Pacio Iso-Seq library protocol	# of PacBio SMRT Cells (1 Mio ZMW)	ENA experiment accession	ENA run accession	# of subreads	# of CCS reads	# of FLNC reads	# of clustered isoforms (>=2 supporting FLNC reads)
PRJEB54001	Mus musculus	Mus mus castaneus	Taiwan	Test_TA	Male	Whole brain	ERS12309916	Clontech	1	ERX9447510	ERR9904682	32788176	472501	266757	26092
								Teloprime v1	1	ERX9447511	ERR9904683	28084598	423851	333550	18682
								Teloprime v2	1	ERX9447512	ERR9904684	18846778	437491	352043	17766

## Sheet: Data S1B
Supplemental Data S1B Sequencing statistics of PacBio Iso-Seq datasets for the mice individuals in the main experiment
ENA study accession	Species	Subspecies	Population (Geographic region)	Individual ID	Sex	Mouse ID	Age (weeks)	Organ	ENA sample accession	Iso-Seq library protocol	Sequencing platform	# of PacBio SMRT Cells (1 Mio ZMW)	ENA experiment accession	ENA run accession	# of raw subreads	# of CCS reads	# of FLNC reads	# of clustered isoforms (>=2 supporting FLNC reads)	Mapping rate to mm39 reference genome
PRJEB54000	Mus musculus	Mus mus domesticus	Germany	GE1	Male	50071902	9.57143	Whole brain	ERS12309386	Teloprime V2	PacBio Sequel I	3	ERX9472985	ERR9929430	54231703	1166700	925060	53440	0.995902
													ERX9472986	ERR9929431
													ERX9472987	ERR9929432
PRJEB54000	Mus musculus	Mus mus domesticus	Germany	GE2	Male	50072079	9.28571	Whole brain	ERS12309387	Teloprime V2	PacBio Sequel I	3	ERX9472988	ERR9929433	51577334	1215827	969924	54895	0.997359
													ERX9472989	ERR9929434
													ERX9472990	ERR9929435
PRJEB54000	Mus musculus	Mus mus domesticus	Germany	GE3	Male	50071894	9.71429	Whole brain	ERS12309388	Teloprime V2	PacBio Sequel I	3	ERX9472991	ERR9929436	59025436	1268401	983151	57624	0.99731
													ERX9472992	ERR9929437
													ERX9472993	ERR9929438
PRJEB54000	Mus musculus	Mus mus domesticus	Germany	GE4	Male	50071866	10.7143	Whole brain	ERS12309389	Teloprime V2	PacBio Sequel I	3	ERX9472994	ERR9929439	61253860	1280259	987173	52082	0.996198
													ERX9472995	ERR9929440
													ERX9472996	ERR9929441
PRJEB54000	Mus musculus	Mus mus domesticus	Germany	GE5	Male	50071859	10.1429	Whole brain	ERS12309390	Teloprime V2	PacBio Sequel I	3	ERX9472997	ERR9929442	55467941	1073726	852225	44495	0.996539
													ERX9472998	ERR9929443
													ERX9472999	ERR9929444
PRJEB54000	Mus musculus	Mus mus domesticus	Germany	GE6	Male	50071854	10.1429	Whole brain	ERS12309391	Teloprime V2	PacBio Sequel I	3	ERX9473000	ERR9929445	53395327	1076246	846059	45240	0.997414
													ERX9473001	ERR9929446
													ERX9473002	ERR9929447
PRJEB54000	Mus musculus	Mus mus domesticus	Germany	GE7	Male	50075631	11.1429	Whole brain	ERS12309392	Teloprime V2	PacBio Sequel I	3	ERX9473003	ERR9929448	55264286	1214449	801258	42552	0.995206
													ERX9473004	ERR9929449
													ERX9473005	ERR9929450
PRJEB54000	Mus musculus	Mus mus domesticus	Germany	GE8	Male	50082112	9.71429	Whole brain	ERS12309393	Teloprime V2	PacBio Sequel I	3	ERX9473006	ERR9929451	76799715	1387539	961468	57715	0.992792
													ERX9473007	ERR9929452
													ERX9473008	ERR9929453
PRJEB54000	Mus musculus	Mus mus domesticus	France	FR1	Male	50071724	11	Whole brain	ERS12309394	Teloprime V2	PacBio Sequel I	3	ERX9473009	ERR9929454	54840238	1203341	886606	52286	0.99671
													ERX9473010	ERR9929455
													ERX9473011	ERR9929456
PRJEB54000	Mus musculus	Mus mus domesticus	France	FR2	Male	50072364	10.1429	Whole brain	ERS12309395	Teloprime V2	PacBio Sequel I	3	ERX9473012	ERR9929457	44441435	1118337	824642	43665	0.997527
													ERX9473013	ERR9929458
													ERX9473014	ERR9929459
PRJEB54000	Mus musculus	Mus mus domesticus	France	FR3	Male	50072350	9.71429	Whole brain	ERS12309396	Teloprime V2	PacBio Sequel I	3	ERX9473015	ERR9929460	45652565	1089682	855043	50390	0.997023
													ERX9473016	ERR9929461
													ERX9473017	ERR9929462
PRJEB54000	Mus musculus	Mus mus domesticus	France	FR4	Male	50072359	9.71429	Whole brain	ERS12309397	Teloprime V2	PacBio Sequel I	3	ERX9473018	ERR9929463	58211873	1222015	906408	52159	0.995705
													ERX9473019	ERR9929464
													ERX9473020	ERR9929465
PRJEB54000	Mus musculus	Mus mus domesticus	France	FR5	Male	50072371	9.42857	Whole brain	ERS12309398	Teloprime V2	PacBio Sequel I	3	ERX9473021	ERR9929466	56153065	1179399	784669	48928	0.993623
													ERX9473022	ERR9929467
													ERX9473023	ERR9929468
PRJEB54000	Mus musculus	Mus mus domesticus	France	FR6	Male	50072377	10.1429	Whole brain	ERS12309399	Teloprime V2	PacBio Sequel I	3	ERX9473024	ERR9929469	62584324	1321657	1020861	50050	0.995285
													ERX9473025	ERR9929470
													ERX9473026	ERR9929471
PRJEB54000	Mus musculus	Mus mus domesticus	France	FR7	Male	50078686	10.1429	Whole brain	ERS12309400	Teloprime V2	PacBio Sequel I	3	ERX9473027	ERR9929472	60189152	1234117	927366	48519	0.993714
													ERX9473028	ERR9929473
													ERX9473029	ERR9929474
PRJEB54000	Mus musculus	Mus mus domesticus	France	FR8	Male	50080266	10.1429	Whole brain	ERS12309401	Teloprime V2	PacBio Sequel I	3	ERX9473030	ERR9929475	87123601	1434287	843491	47265	0.992383
													ERX9473031	ERR9929476
													ERX9473032	ERR9929477
PRJEB54000	Mus musculus	Mus mus domesticus	Iran	IR1	Male	50071668	11.2857	Whole brain	ERS12309402	Teloprime V2	PacBio Sequel I	3	ERX9473033	ERR9929478	54441084	1189975	935596	54109	0.996747
													ERX9473034	ERR9929479
													ERX9473035	ERR9929480
PRJEB54000	Mus musculus	Mus mus domesticus	Iran	IR2	Male	50071576	11.1429	Whole brain	ERS12309403	Teloprime V2	PacBio Sequel I	3	ERX9473036	ERR9929481	56954159	1188581	953234	52115	0.996143
													ERX9473037	ERR9929482
													ERX9473038	ERR9929483
PRJEB54000	Mus musculus	Mus mus domesticus	Iran	IR3	Male	50071558	11	Whole brain	ERS12309404	Teloprime V2	PacBio Sequel I	3	ERX9473039	ERR9929484	80898121	1350832	1013350	56481	0.993626
													ERX9473040	ERR9929485
													ERX9473041	ERR9929486
PRJEB54000	Mus musculus	Mus mus domesticus	Iran	IR4	Male	50071545	11.2857	Whole brain	ERS12309405	Teloprime V2	PacBio Sequel I	3	ERX9473042	ERR9929487	70774303	1392956	1062995	55995	0.995571
													ERX9473043	ERR9929488
													ERX9473044	ERR9929489
PRJEB54000	Mus musculus	Mus mus domesticus	Iran	IR5	Male	50071696	9.85714	Whole brain	ERS12309406	Teloprime V2	PacBio Sequel I	3	ERX9473045	ERR9929490	60535822	1253257	980841	51955	0.996728
													ERX9473046	ERR9929491
													ERX9473047	ERR9929492
PRJEB54000	Mus musculus	Mus mus domesticus	Iran	IR6	Male	50071701	10.4286	Whole brain	ERS12309407	Teloprime V2	PacBio Sequel I	3	ERX9473048	ERR9929493	62423334	1272920	1008031	53973	0.995127
													ERX9473049	ERR9929494
													ERX9473050	ERR9929495
PRJEB54000	Mus musculus	Mus mus domesticus	Iran	IR7	Male	50072126	9.42857	Whole brain	ERS12309408	Teloprime V2	PacBio Sequel I	3	ERX9473051	ERR9929496	44721651	1074305	870888	45640	0.997217
													ERX9473052	ERR9929497
													ERX9473053	ERR9929498
PRJEB54000	Mus musculus	Mus mus domesticus	Iran	IR8	Male	50072549	10	Whole brain	ERS12309409	Teloprime V2	PacBio Sequel I	3	ERX9473054	ERR9929499	40314276	829419	677193	36664	0.99419
													ERX9473055	ERR9929500
													ERX9473056	ERR9929501
PRJEB54000	Mus musculus	Mus mus musculus	Kazakhstan	KA1	Male	50077250	9.57143	Whole brain	ERS12309410	Teloprime V2	PacBio Sequel I	3	ERX9473057	ERR9929502	72298417	1390015	986302	51605	0.994245
													ERX9473058	ERR9929503
													ERX9473059	ERR9929504
PRJEB54000	Mus musculus	Mus mus musculus	Kazakhstan	KA2	Male	50077244	9.57143	Whole brain	ERS12309411	Teloprime V2	PacBio Sequel I	3	ERX9473060	ERR9929505	73504802	1401113	685163	42076	0.996245
													ERX9473061	ERR9929506
													ERX9473062	ERR9929507
PRJEB54000	Mus musculus	Mus mus musculus	Kazakhstan	KA3	Male	50077472	9.71429	Whole brain	ERS12309412	Teloprime V2	PacBio Sequel I	3	ERX9473063	ERR9929508	48789990	1035298	824158	43747	0.997166
													ERX9473064	ERR9929509
													ERX9473065	ERR9929510
PRJEB54000	Mus musculus	Mus mus musculus	Kazakhstan	KA4	Male	50078088	9.42857	Whole brain	ERS12309413	Teloprime V2	PacBio Sequel I	3	ERX9473066	ERR9929511	55640612	1098515	854504	43634	0.997364
													ERX9473067	ERR9929512
													ERX9473068	ERR9929513
PRJEB54000	Mus musculus	Mus mus musculus	Kazakhstan	KA5	Male	50078079	9.42857	Whole brain	ERS12309414	Teloprime V2	PacBio Sequel I	3	ERX9473069	ERR9929514	55059997	1146249	910691	46140	0.997919
													ERX9473070	ERR9929515
													ERX9473071	ERR9929516
PRJEB54000	Mus musculus	Mus mus musculus	Kazakhstan	KA6	Male	50077958	9.71429	Whole brain	ERS12309415	Teloprime V2	PacBio Sequel I	3	ERX9473072	ERR9929517	59300550	1223605	966328	47921	0.997204
													ERX9473073	ERR9929518
													ERX9473074	ERR9929519
PRJEB54000	Mus musculus	Mus mus musculus	Kazakhstan	KA7	Male	50077686	10.1429	Whole brain	ERS12309416	Teloprime V2	PacBio Sequel I	3	ERX9473075	ERR9929520	62180927	1313705	1014730	48008	0.996105
													ERX9473076	ERR9929521
													ERX9473077	ERR9929522
PRJEB54000	Mus musculus	Mus mus musculus	Kazakhstan	KA8	Male	50077673	10.4286	Whole brain	ERS12309417	Teloprime V2	PacBio Sequel I	3	ERX9473078	ERR9929523	64007972	1321952	996355	49536	0.995761
													ERX9473079	ERR9929524
													ERX9473080	ERR9929525
PRJEB54000	Mus musculus	Mus mus castaneus	Taiwan	TA1	Male	50072750	9.57143	Whole brain	ERS12309418	Teloprime V2	PacBio Sequel I	3	ERX9473081	ERR9929526	45349960	861940	705862	38715	0.996306
													ERX9473082	ERR9929527
													ERX9473083	ERR9929528
PRJEB54000	Mus musculus	Mus mus castaneus	Taiwan	TA2	Male	50073107	10	Whole brain	ERS12309419	Teloprime V2	PacBio Sequel I	3	ERX9473084	ERR9929529	59123796	1141304	925951	47873	0.996156
													ERX9473085	ERR9929530
													ERX9473086	ERR9929531
PRJEB54000	Mus musculus	Mus mus castaneus	Taiwan	TA3	Male	50073575	10	Whole brain	ERS12309420	Teloprime V2	PacBio Sequel I	3	ERX9473087	ERR9929532	67204906	1294927	1029911	54046	0.994153
													ERX9473088	ERR9929533
													ERX9473089	ERR9929534
PRJEB54000	Mus musculus	Mus mus castaneus	Taiwan	TA4	Male	50072806	10.4286	Whole brain	ERS12309421	Teloprime V2	PacBio Sequel I	3	ERX9473090	ERR9929535	58599999	1262406	985361	48419	0.995498
													ERX9473091	ERR9929536
													ERX9473092	ERR9929537
PRJEB54000	Mus musculus	Mus mus castaneus	Taiwan	TA5	Male	50081403	10	Whole brain	ERS12309422	Teloprime V2	PacBio Sequel I	3	ERX9473093	ERR9929538	55448152	1125839	837321	47695	0.994507
													ERX9473094	ERR9929539
													ERX9473095	ERR9929540
PRJEB54000	Mus musculus	Mus mus castaneus	Taiwan	TA6	Male	50081417	10	Whole brain	ERS12309423	Teloprime V2	PacBio Sequel I	3	ERX9473096	ERR9929541	64425881	1248620	940994	51329	0.99437
													ERX9473097	ERR9929542
													ERX9473098	ERR9929543
PRJEB54000	Mus musculus	Mus mus castaneus	Taiwan	TA7	Male	50081422	9.71429	Whole brain	ERS12309424	Teloprime V2	PacBio Sequel I	3	ERX9473099	ERR9929544	68362755	1351922	845997	48804	0.995513
													ERX9473100	ERR9929545
													ERX9473101	ERR9929546
PRJEB54000	Mus musculus	Mus mus castaneus	Taiwan	TA8	Male	50081428	10	Whole brain	ERS12309425	Teloprime V2	PacBio Sequel I	3	ERX9473102	ERR9929547	61265863	1088338	868611	48802	0.992377
													ERX9473103	ERR9929548
													ERX9473104	ERR9929549
PRJEB54000	Mus spicilegus	-	Slovakia	SL1	Male	50082138	10	Whole brain	ERS12309426	Teloprime V2	PacBio Sequel I	3	ERX9473105	ERR9929550	69740845	1283602	869761	49224	0.993052
													ERX9473106	ERR9929551
													ERX9473107	ERR9929552
PRJEB54000	Mus spicilegus	-	Slovakia	SL2	Male	50083217	10	Whole brain	ERS12309427	Teloprime V2	PacBio Sequel I	3	ERX9473108	ERR9929553	67216358	1256480	880977	52882	0.99011
													ERX9473109	ERR9929554
													ERX9473110	ERR9929555
PRJEB54000	Mus spicilegus	-	Slovakia	SL3	Male	50083226	10	Whole brain	ERS12309428	Teloprime V2	PacBio Sequel I	3	ERX9473111	ERR9929556	61884757	1253348	907531	51163	0.994117
													ERX9473112	ERR9929557
													ERX9473113	ERR9929558
PRJEB54000	Mus spicilegus	-	Slovakia	SL4	Male	50084959	10.1429	Whole brain	ERS12309429	Teloprime V2	PacBio Sequel I	3	ERX9473114	ERR9929559	77418220	1262022	904603	50813	0.991065
													ERX9473115	ERR9929560
													ERX9473116	ERR9929561
PRJEB54000	Mus spretus	-	Spain	SP1	Male	50077939	10	Whole brain	ERS12309430	Teloprime V2	PacBio Sequel I	3	ERX9473117	ERR9929562	58519935	1243946	944617	46946	0.994611
													ERX9473118	ERR9929563
													ERX9473119	ERR9929564
PRJEB54000	Mus spretus	-	Spain	SP2	Male	50077918	10	Whole brain	ERS12309431	Teloprime V2	PacBio Sequel I	3	ERX9473120	ERR9929565	60560205	1281850	947658	48039	0.994858
													ERX9473121	ERR9929566
													ERX9473122	ERR9929567
PRJEB54000	Mus spretus	-	Spain	SP3	Male	50077936	10	Whole brain	ERS12309432	Teloprime V2	PacBio Sequel I	3	ERX9473123	ERR9929568	60199558	1253864	972686	49236	0.993257
													ERX9473124	ERR9929569
													ERX9473125	ERR9929570
PRJEB54000	Mus spretus	-	Spain	SP4	Male	50077907	10	Whole brain	ERS12309433	Teloprime V2	PacBio Sequel I	3	ERX9473126	ERR9929571	53254761	1127750	888154	44183	0.994161
													ERX9473127	ERR9929572
													ERX9473128	ERR9929573

## Sheet: Data S1C
Supplemental Data S1C Sequencing statistics of Illumina RNA-Seq datasets for the mice individuals in the main experiment
ENA study accession	Species	Subspecies	Population (Geographic region)	Individual ID	Sex	Organ	ENA sample accession	ENA experiment accession	ENA run accession	Sequeincing platform	Read length(bp)	Strandness	# of raw read pairs	# of filtered read pairs	Unique mapping rate to mm39 reference genome (STAR)
PRJEB53988	Mus musculus	Mus mus domesticus	Germany	GE1	Male	Whole brain	ERS12309386	ERX9450841	ERR9908022	Illumina HiSeq3000	2 x 150	Reversely stranded	27481050	26503675	0.95
PRJEB53988	Mus musculus	Mus mus domesticus	Germany	GE2	Male	Whole brain	ERS12309387	ERX9450842	ERR9908023	Illumina HiSeq3000	2 x 150	Reversely stranded	24756044	23937279	0.949
PRJEB53988	Mus musculus	Mus mus domesticus	Germany	GE3	Male	Whole brain	ERS12309388	ERX9450843	ERR9908024	Illumina HiSeq3000	2 x 150	Reversely stranded	26445323	25557571	0.9485
PRJEB53988	Mus musculus	Mus mus domesticus	Germany	GE4	Male	Whole brain	ERS12309389	ERX9450844	ERR9908025	Illumina HiSeq3000	2 x 150	Reversely stranded	25062724	24330792	0.9457
PRJEB53988	Mus musculus	Mus mus domesticus	Germany	GE5	Male	Whole brain	ERS12309390	ERX9450845	ERR9908026	Illumina HiSeq3000	2 x 150	Reversely stranded	25007975	24291337	0.9503
PRJEB53988	Mus musculus	Mus mus domesticus	Germany	GE6	Male	Whole brain	ERS12309391	ERX9450846	ERR9908027	Illumina HiSeq3000	2 x 150	Reversely stranded	27025619	26218901	0.948
PRJEB53988	Mus musculus	Mus mus domesticus	Germany	GE7	Male	Whole brain	ERS12309392	ERX9450847	ERR9908028	Illumina HiSeq3000	2 x 150	Reversely stranded	28391856	27355574	0.9473
PRJEB53988	Mus musculus	Mus mus domesticus	Germany	GE8	Male	Whole brain	ERS12309393	ERX9450848	ERR9908029	Illumina HiSeq3000	2 x 150	Reversely stranded	27076179	26183920	0.9385
PRJEB53988	Mus musculus	Mus mus domesticus	France	FR1	Male	Whole brain	ERS12309394	ERX9450849	ERR9908030	Illumina HiSeq3000	2 x 150	Reversely stranded	26178771	25376999	0.9492
PRJEB53988	Mus musculus	Mus mus domesticus	France	FR2	Male	Whole brain	ERS12309395	ERX9450850	ERR9908031	Illumina HiSeq3000	2 x 150	Reversely stranded	25189109	24338104	0.9504
PRJEB53988	Mus musculus	Mus mus domesticus	France	FR3	Male	Whole brain	ERS12309396	ERX9450851	ERR9908032	Illumina HiSeq3000	2 x 150	Reversely stranded	25840537	24993977	0.9491
PRJEB53988	Mus musculus	Mus mus domesticus	France	FR4	Male	Whole brain	ERS12309397	ERX9450852	ERR9908033	Illumina HiSeq3000	2 x 150	Reversely stranded	25638267	24875188	0.9498
PRJEB53988	Mus musculus	Mus mus domesticus	France	FR5	Male	Whole brain	ERS12309398	ERX9450853	ERR9908034	Illumina HiSeq3000	2 x 150	Reversely stranded	24180567	23401902	0.9475
PRJEB53988	Mus musculus	Mus mus domesticus	France	FR6	Male	Whole brain	ERS12309399	ERX9450854	ERR9908035	Illumina HiSeq3000	2 x 150	Reversely stranded	25124166	24303332	0.9482
PRJEB53988	Mus musculus	Mus mus domesticus	France	FR7	Male	Whole brain	ERS12309400	ERX9450855	ERR9908036	Illumina HiSeq3000	2 x 150	Reversely stranded	31526026	30547380	0.9482
PRJEB53988	Mus musculus	Mus mus domesticus	France	FR8	Male	Whole brain	ERS12309401	ERX9450856	ERR9908037	Illumina HiSeq3000	2 x 150	Reversely stranded	29633571	28602398	0.9463
PRJEB53988	Mus musculus	Mus mus domesticus	Iran	IR1	Male	Whole brain	ERS12309402	ERX9450857	ERR9908038	Illumina HiSeq3000	2 x 150	Reversely stranded	26748513	25909590	0.9417
PRJEB53988	Mus musculus	Mus mus domesticus	Iran	IR2	Male	Whole brain	ERS12309403	ERX9450858	ERR9908039	Illumina HiSeq3000	2 x 150	Reversely stranded	28282373	26998685	0.9453
PRJEB53988	Mus musculus	Mus mus domesticus	Iran	IR3	Male	Whole brain	ERS12309404	ERX9450859	ERR9908040	Illumina HiSeq3000	2 x 150	Reversely stranded	25207101	24475703	0.9337
PRJEB53988	Mus musculus	Mus mus domesticus	Iran	IR4	Male	Whole brain	ERS12309405	ERX9450860	ERR9908041	Illumina HiSeq3000	2 x 150	Reversely stranded	25283461	24452146	0.9374
PRJEB53988	Mus musculus	Mus mus domesticus	Iran	IR5	Male	Whole brain	ERS12309406	ERX9450861	ERR9908042	Illumina HiSeq3000	2 x 150	Reversely stranded	27625074	26560079	0.94
PRJEB53988	Mus musculus	Mus mus domesticus	Iran	IR6	Male	Whole brain	ERS12309407	ERX9450862	ERR9908043	Illumina HiSeq3000	2 x 150	Reversely stranded	25458103	24687517	0.9454
PRJEB53988	Mus musculus	Mus mus domesticus	Iran	IR7	Male	Whole brain	ERS12309408	ERX9450863	ERR9908044	Illumina HiSeq3000	2 x 150	Reversely stranded	25873186	25070507	0.9424
PRJEB53988	Mus musculus	Mus mus domesticus	Iran	IR8	Male	Whole brain	ERS12309409	ERX9450864	ERR9908045	Illumina HiSeq3000	2 x 150	Reversely stranded	25828338	24932815	0.9378
PRJEB53988	Mus musculus	Mus mus musculus	Kazakhstan	KA1	Male	Whole brain	ERS12309410	ERX9450865	ERR9908046	Illumina HiSeq3000	2 x 150	Reversely stranded	30750450	29758810	0.9351
PRJEB53988	Mus musculus	Mus mus musculus	Kazakhstan	KA2	Male	Whole brain	ERS12309411	ERX9450866	ERR9908047	Illumina HiSeq3000	2 x 150	Reversely stranded	25721937	24916362	0.937
PRJEB53988	Mus musculus	Mus mus musculus	Kazakhstan	KA3	Male	Whole brain	ERS12309412	ERX9450867	ERR9908048	Illumina HiSeq3000	2 x 150	Reversely stranded	30219710	29210250	0.9369
PRJEB53988	Mus musculus	Mus mus musculus	Kazakhstan	KA4	Male	Whole brain	ERS12309413	ERX9450868	ERR9908049	Illumina HiSeq3000	2 x 150	Reversely stranded	31075860	30167201	0.9369
PRJEB53988	Mus musculus	Mus mus musculus	Kazakhstan	KA5	Male	Whole brain	ERS12309414	ERX9450869	ERR9908050	Illumina HiSeq3000	2 x 150	Reversely stranded	27575392	26738361	0.9369
PRJEB53988	Mus musculus	Mus mus musculus	Kazakhstan	KA6	Male	Whole brain	ERS12309415	ERX9450870	ERR9908051	Illumina HiSeq3000	2 x 150	Reversely stranded	31942042	30973965	0.9342
PRJEB53988	Mus musculus	Mus mus musculus	Kazakhstan	KA7	Male	Whole brain	ERS12309416	ERX9450871	ERR9908052	Illumina HiSeq3000	2 x 150	Reversely stranded	30473141	29545787	0.9362
PRJEB53988	Mus musculus	Mus mus musculus	Kazakhstan	KA8	Male	Whole brain	ERS12309417	ERX9450872	ERR9908053	Illumina HiSeq3000	2 x 150	Reversely stranded	28977126	27970921	0.9355
PRJEB53988	Mus musculus	Mus mus castaneus	Taiwan	TA1	Male	Whole brain	ERS12309418	ERX9450873	ERR9908054	Illumina HiSeq3000	2 x 150	Reversely stranded	26839153	26001824	0.9324
PRJEB53988	Mus musculus	Mus mus castaneus	Taiwan	TA2	Male	Whole brain	ERS12309419	ERX9450874	ERR9908055	Illumina HiSeq3000	2 x 150	Reversely stranded	27164498	26458295	0.9278
PRJEB53988	Mus musculus	Mus mus castaneus	Taiwan	TA3	Male	Whole brain	ERS12309420	ERX9450875	ERR9908056	Illumina HiSeq3000	2 x 150	Reversely stranded	24423284	23446232	0.9231
PRJEB53988	Mus musculus	Mus mus castaneus	Taiwan	TA4	Male	Whole brain	ERS12309421	ERX9450876	ERR9908057	Illumina HiSeq3000	2 x 150	Reversely stranded	26103912	25069514	0.9296
PRJEB53988	Mus musculus	Mus mus castaneus	Taiwan	TA5	Male	Whole brain	ERS12309422	ERX9450877	ERR9908058	Illumina HiSeq3000	2 x 150	Reversely stranded	34665226	33727570	0.9391
PRJEB53988	Mus musculus	Mus mus castaneus	Taiwan	TA6	Male	Whole brain	ERS12309423	ERX9450878	ERR9908059	Illumina HiSeq3000	2 x 150	Reversely stranded	34823017	33940052	0.9382
PRJEB53988	Mus musculus	Mus mus castaneus	Taiwan	TA7	Male	Whole brain	ERS12309424	ERX9450879	ERR9908060	Illumina HiSeq3000	2 x 150	Reversely stranded	25231804	24610524	0.9401
PRJEB53988	Mus musculus	Mus mus castaneus	Taiwan	TA8	Male	Whole brain	ERS12309425	ERX9450880	ERR9908061	Illumina HiSeq3000	2 x 150	Reversely stranded	37443725	36534895	0.9378
PRJEB53988	Mus spicilegus	-	Slovakia	SL1	Male	Whole brain	ERS12309426	ERX9450881	ERR9908062	Illumina HiSeq3000	2 x 150	Reversely stranded	32970678	31915687	0.9201
PRJEB53988	Mus spicilegus	-	Slovakia	SL2	Male	Whole brain	ERS12309427	ERX9450882	ERR9908063	Illumina HiSeq3000	2 x 150	Reversely stranded	30539836	29576711	0.9204
PRJEB53988	Mus spicilegus	-	Slovakia	SL3	Male	Whole brain	ERS12309428	ERX9450883	ERR9908064	Illumina HiSeq3000	2 x 150	Reversely stranded	29507800	28476738	0.9201
PRJEB53988	Mus spicilegus	-	Slovakia	SL4	Male	Whole brain	ERS12309429	ERX9450884	ERR9908065	Illumina HiSeq3000	2 x 150	Reversely stranded	33989507	3.26403e+07	0.9157
PRJEB53988	Mus spretus	-	Spain	SP1	Male	Whole brain	ERS12309430	ERX9450885	ERR9908066	Illumina HiSeq3000	2 x 150	Reversely stranded	36337045	35545058	0.9285
PRJEB53988	Mus spretus	-	Spain	SP2	Male	Whole brain	ERS12309431	ERX9450886	ERR9908067	Illumina HiSeq3000	2 x 150	Reversely stranded	28137293	27510157	0.9278
PRJEB53988	Mus spretus	-	Spain	SP3	Male	Whole brain	ERS12309432	ERX9450887	ERR9908068	Illumina HiSeq3000	2 x 150	Reversely stranded	27634223	27254766	0.9243
PRJEB53988	Mus spretus	-	Spain	SP4	Male	Whole brain	ERS12309433	ERX9450888	ERR9908069	Illumina HiSeq3000	2 x 150	Reversely stranded	26864298	26166496	0.9261

## Sheet: Data S1D
Supplemental Data S1D Public available transcriptomic sequencing data used in this study. The dataset was retrieved from Lin S et al 2014 PNAS (PMID: 25413365).
Mouse line	Sample gender	Tissue	ENCODE Accession	Biosample ID	Library ID	Strand specificity	Read length
C57BL/6	male adult (10 weeks)	adipose	ENCSR288TLO	ENCBS298QDT	ENCLB096OMT	RF	2*101bp
C57BL/6	female adult (10 weeks)	adrenal gland	ENCSR713OCQ	ENCBS816ZVY	ENCLB053GTI	RF	2*101bp
C57BL/6	male adult (10 weeks)	brain	ENCSR554PHF	ENCBS693QXI	ENCLB226LNT	RF	2*101bp
C57BL/6	female adult (10 weeks)	heart	ENCSR164BAZ	ENCBS183QIH	ENCLB780BEM	RF	2*101bp
C57BL/6	female adult (10 weeks)	kidney	ENCSR394YLM	ENCBS618GAD	ENCLB821KIP	RF	2*101bp
C57BL/6	female adult (10 weeks)	liver	ENCSR216KLZ	ENCBS391ULH	ENCLB868QQG	RF	2*101bp
C57BL/6	female adult (10 weeks)	lung	ENCSR870AQU	ENCBS964PGO	ENCLB271PTR	RF	2*101bp
C57BL/6	female adult (10 weeks)	ovary	ENCSR516UNF	ENCBS887UIO	ENCLB854BJZ	RF	2*101bp
C57BL/6	female adult (10 weeks)	pancreas	ENCSR248XKS	ENCBS508NKR	ENCLB238YXU	RF	2*101bp
C57BL/6	female adult (10 weeks)	sigmoid colon	ENCSR518GDK	ENCBS400IVQ	ENCLB897OWT	RF	2*101bp
C57BL/6	female adult (10 weeks)	small intestine	ENCSR170SVO	ENCBS443BDC	ENCLB063VIY	RF	2*101bp
C57BL/6	male adult (10 weeks)	spleen	ENCSR966JPL	ENCBS614NNG	ENCLB601GXX	RF	2*101bp
C57BL/6	male adult (10 weeks)	testis	ENCSR266ESZ	ENCBS928FOT	ENCLB219TSB	RF	2*101bp

## Sheet: Data S1E
Supplemental Data S1E Pairwise individual relatedness estimates for all possible pairs of individuals. The relatedness category was defined based on the reference (PMID: 20926424): 1) Duplicate samples/monozygotic twins: Phi >0.3754; 2) First degree relatives: 0.177<Phi <0.3754; 3) Second degree relatives: 0.0884<Phi <0.177; 4) Third degree relatives: 0.0442<Phi <0.0884; 5) Unrelated individuals:…
Individual_1_ID	Individual_1_Population	Individual_2_ID	Individual_2_Population	Relatedness_Phi	Relatedness_Category
GE1	M.m.dom_GE	GE2	M.m.dom_GE	-0.0540431	Unrelated
GE1	M.m.dom_GE	GE3	M.m.dom_GE	-0.0224498	Unrelated
GE1	M.m.dom_GE	GE4	M.m.dom_GE	-0.124793	Unrelated
GE1	M.m.dom_GE	GE5	M.m.dom_GE	-0.0657523	Unrelated
GE1	M.m.dom_GE	GE6	M.m.dom_GE	-0.0854392	Unrelated
GE1	M.m.dom_GE	GE7	M.m.dom_GE	-0.0763695	Unrelated
GE1	M.m.dom_GE	GE8	M.m.dom_GE	-0.0347615	Unrelated
GE1	M.m.dom_GE	FR1	M.m.dom_FR	-0.454068	Unrelated
GE1	M.m.dom_GE	FR2	M.m.dom_FR	-0.460996	Unrelated
GE1	M.m.dom_GE	FR3	M.m.dom_FR	-0.438303	Unrelated
GE1	M.m.dom_GE	FR4	M.m.dom_FR	-0.437256	Unrelated
GE1	M.m.dom_GE	FR5	M.m.dom_FR	-0.453639	Unrelated
GE1	M.m.dom_GE	FR6	M.m.dom_FR	-0.458141	Unrelated
GE1	M.m.dom_GE	FR7	M.m.dom_FR	-0.494091	Unrelated
GE1	M.m.dom_GE	FR8	M.m.dom_FR	-0.518254	Unrelated
GE1	M.m.dom_GE	IR1	M.m.dom_IR	-0.697314	Unrelated
GE1	M.m.dom_GE	IR2	M.m.dom_IR	-0.639388	Unrelated
GE1	M.m.dom_GE	IR3	M.m.dom_IR	-0.744847	Unrelated
GE1	M.m.dom_GE	IR4	M.m.dom_IR	-0.646366	Unrelated
GE1	M.m.dom_GE	IR5	M.m.dom_IR	-0.594489	Unrelated
GE1	M.m.dom_GE	IR6	M.m.dom_IR	-0.770123	Unrelated
GE1	M.m.dom_GE	IR7	M.m.dom_IR	-0.654807	Unrelated
GE1	M.m.dom_GE	IR8	M.m.dom_IR	-0.76374	Unrelated
GE1	M.m.dom_GE	KA1	M.m.mus_KA	-3.15855	Unrelated
GE1	M.m.dom_GE	KA2	M.m.mus_KA	-3.38701	Unrelated
GE1	M.m.dom_GE	KA3	M.m.mus_KA	-3.18169	Unrelated
GE1	M.m.dom_GE	KA4	M.m.mus_KA	-3.1372	Unrelated
GE1	M.m.dom_GE	KA5	M.m.mus_KA	-3.26978	Unrelated
GE1	M.m.dom_GE	KA6	M.m.mus_KA	-3.27879	Unrelated
GE1	M.m.dom_GE	KA7	M.m.mus_KA	-3.11911	Unrelated
GE1	M.m.dom_GE	KA8	M.m.mus_KA	-3.15376	Unrelated
GE1	M.m.dom_GE	TA1	M.m.cas_TA	-3.73003	Unrelated
GE1	M.m.dom_GE	TA2	M.m.cas_TA	-3.81321	Unrelated
GE1	M.m.dom_GE	TA3	M.m.cas_TA	-3.80389	Unrelated
GE1	M.m.dom_GE	TA4	M.m.cas_TA	-3.54094	Unrelated
GE1	M.m.dom_GE	TA5	M.m.cas_TA	-3.18593	Unrelated
GE1	M.m.dom_GE	TA6	M.m.cas_TA	-3.41209	Unrelated
GE1	M.m.dom_GE	TA7	M.m.cas_TA	-3.54031	Unrelated
GE1	M.m.dom_GE	TA8	M.m.cas_TA	-3.83384	Unrelated
GE1	M.m.dom_GE	SL1	M.spretus	-13.8481	Unrelated
GE1	M.m.dom_GE	SL2	M.spretus	-13.3699	Unrelated
GE1	M.m.dom_GE	SL3	M.spretus	-13.7016	Unrelated
GE1	M.m.dom_GE	SL4	M.spretus	-13.4745	Unrelated
GE1	M.m.dom_GE	SP1	M.spicilegus	-8.22557	Unrelated
GE1	M.m.dom_GE	SP2	M.spicilegus	-9.05685	Unrelated
GE1	M.m.dom_GE	SP3	M.spicilegus	-8.92505	Unrelated
GE1	M.m.dom_GE	SP4	M.spicilegus	-8.79268	Unrelated
GE2	M.m.dom_GE	GE1	M.m.dom_GE	-0.0540431	Unrelated
GE2	M.m.dom_GE	GE3	M.m.dom_GE	-0.0564	Unrelated
GE2	M.m.dom_GE	GE4	M.m.dom_GE	-0.106616	Unrelated
GE2	M.m.dom_GE	GE5	M.m.dom_GE	-0.114754	Unrelated
GE2	M.m.dom_GE	GE6	M.m.dom_GE	-0.120619	Unrelated
GE2	M.m.dom_GE	GE7	M.m.dom_GE	-0.0999188	Unrelated
GE2	M.m.dom_GE	GE8	M.m.dom_GE	-0.128953	Unrelated
GE2	M.m.dom_GE	FR1	M.m.dom_FR	-0.497717	Unrelated
GE2	M.m.dom_GE	FR2	M.m.dom_FR	-0.499602	Unrelated
GE2	M.m.dom_GE	FR3	M.m.dom_FR	-0.486166	Unrelated
GE2	M.m.dom_GE	FR4	M.m.dom_FR	-0.510882	Unrelated
GE2	M.m.dom_GE	FR5	M.m.dom_FR	-0.476387	Unrelated
GE2	M.m.dom_GE	FR6	M.m.dom_FR	-0.497466	Unrelated
GE2	M.m.dom_GE	FR7	M.m.dom_FR	-0.519737	Unrelated
GE2	M.m.dom_GE	FR8	M.m.dom_FR	-0.559049	Unrelated
GE2	M.m.dom_GE	IR1	M.m.dom_IR	-0.716928	Unrelated
GE2	M.m.dom_GE	IR2	M.m.dom_IR	-0.682845	Unrelated
GE2	M.m.dom_GE	IR3	M.m.dom_IR	-0.785586	Unrelated
GE2	M.m.dom_GE	IR4	M.m.dom_IR	-0.680873	Unrelated
GE2	M.m.dom_GE	IR5	M.m.dom_IR	-0.61392	Unrelated
GE2	M.m.dom_GE	IR6	M.m.dom_IR	-0.824936	Unrelated
GE2	M.m.dom_GE	IR7	M.m.dom_IR	-0.699029	Unrelated
GE2	M.m.dom_GE	IR8	M.m.dom_IR	-0.808903	Unrelated
GE2	M.m.dom_GE	KA1	M.m.mus_KA	-3.26027	Unrelated
GE2	M.m.dom_GE	KA2	M.m.mus_KA	-3.50171	Unrelated
GE2	M.m.dom_GE	KA3	M.m.mus_KA	-3.27419	Unrelated
GE2	M.m.dom_GE	KA4	M.m.mus_KA	-3.22696	Unrelated
GE2	M.m.dom_GE	KA5	M.m.mus_KA	-3.36669	Unrelated
GE2	M.m.dom_GE	KA6	M.m.mus_KA	-3.38632	Unrelated
GE2	M.m.dom_GE	KA7	M.m.mus_KA	-3.20983	Unrelated
GE2	M.m.dom_GE	KA8	M.m.mus_KA	-3.24919	Unrelated
GE2	M.m.dom_GE	TA1	M.m.cas_TA	-3.86056	Unrelated
GE2	M.m.dom_GE	TA2	M.m.cas_TA	-3.95316	Unrelated
GE2	M.m.dom_GE	TA3	M.m.cas_TA	-3.92487	Unrelated
GE2	M.m.dom_GE	TA4	M.m.cas_TA	-3.65232	Unrelated
GE2	M.m.dom_GE	TA5	M.m.cas_TA	-3.29651	Unrelated
GE2	M.m.dom_GE	TA6	M.m.cas_TA	-3.50911	Unrelated
GE2	M.m.dom_GE	TA7	M.m.cas_TA	-3.66694	Unrelated
GE2	M.m.dom_GE	TA8	M.m.cas_TA	-3.96147	Unrelated
GE2	M.m.dom_GE	SL1	M.spretus	-14.2772	Unrelated
GE2	M.m.dom_GE	SL2	M.spretus	-13.7832	Unrelated
GE2	M.m.dom_GE	SL3	M.spretus	-14.1284	Unrelated
GE2	M.m.dom_GE	SL4	M.spretus	-13.9003	Unrelated
GE2	M.m.dom_GE	SP1	M.spicilegus	-8.40909	Unrelated
GE2	M.m.dom_GE	SP2	M.spicilegus	-9.27266	Unrelated
GE2	M.m.dom_GE	SP3	M.spicilegus	-9.13991	Unrelated
GE2	M.m.dom_GE	SP4	M.spicilegus	-9.00112	Unrelated
GE3	M.m.dom_GE	GE1	M.m.dom_GE	-0.0224498	Unrelated
GE3	M.m.dom_GE	GE2	M.m.dom_GE	-0.0564	Unrelated
GE3	M.m.dom_GE	GE4	M.m.dom_GE	-0.0461036	Unrelated
GE3	M.m.dom_GE	GE5	M.m.dom_GE	-0.0667196	Unrelated
GE3	M.m.dom_GE	GE6	M.m.dom_GE	-0.0327804	Unrelated
GE3	M.m.dom_GE	GE7	M.m.dom_GE	-0.0637795	Unrelated
GE3	M.m.dom_GE	GE8	M.m.dom_GE	-0.0939117	Unrelated
GE3	M.m.dom_GE	FR1	M.m.dom_FR	-0.460828	Unrelated
GE3	M.m.dom_GE	FR2	M.m.dom_FR	-0.46834	Unrelated
GE3	M.m.dom_GE	FR3	M.m.dom_FR	-0.457439	Unrelated
GE3	M.m.dom_GE	FR4	M.m.dom_FR	-0.471017	Unrelated
GE3	M.m.dom_GE	FR5	M.m.dom_FR	-0.450838	Unrelated
GE3	M.m.dom_GE	FR6	M.m.dom_FR	-0.464624	Unrelated
GE3	M.m.dom_GE	FR7	M.m.dom_FR	-0.474455	Unrelated
GE3	M.m.dom_GE	FR8	M.m.dom_FR	-0.51739	Unrelated
GE3	M.m.dom_GE	IR1	M.m.dom_IR	-0.67754	Unrelated
GE3	M.m.dom_GE	IR2	M.m.dom_IR	-0.63711	Unrelated
GE3	M.m.dom_GE	IR3	M.m.dom_IR	-0.743077	Unrelated
GE3	M.m.dom_GE	IR4	M.m.dom_IR	-0.659582	Unrelated
GE3	M.m.dom_GE	IR5	M.m.dom_IR	-0.585147	Unrelated
GE3	M.m.dom_GE	IR6	M.m.dom_IR	-0.780122	Unrelated
GE3	M.m.dom_GE	IR7	M.m.dom_IR	-0.647873	Unrelated
GE3	M.m.dom_GE	IR8	M.m.dom_IR	-0.765927	Unrelated
GE3	M.m.dom_GE	KA1	M.m.mus_KA	-3.13394	Unrelated
GE3	M.m.dom_GE	KA2	M.m.mus_KA	-3.35775	Unrelated
GE3	M.m.dom_GE	KA3	M.m.mus_KA	-3.14052	Unrelated
GE3	M.m.dom_GE	KA4	M.m.mus_KA	-3.09313	Unrelated
GE3	M.m.dom_GE	KA5	M.m.mus_KA	-3.23113	Unrelated
GE3	M.m.dom_GE	KA6	M.m.mus_KA	-3.24578	Unrelated
GE3	M.m.dom_GE	KA7	M.m.mus_KA	-3.08215	Unrelated
GE3	M.m.dom_GE	KA8	M.m.mus_KA	-3.11629	Unrelated
GE3	M.m.dom_GE	TA1	M.m.cas_TA	-3.69538	Unrelated
GE3	M.m.dom_GE	TA2	M.m.cas_TA	-3.7736	Unrelated
GE3	M.m.dom_GE	TA3	M.m.cas_TA	-3.77018	Unrelated
GE3	M.m.dom_GE	TA4	M.m.cas_TA	-3.50481	Unrelated
GE3	M.m.dom_GE	TA5	M.m.cas_TA	-3.15782	Unrelated
GE3	M.m.dom_GE	TA6	M.m.cas_TA	-3.36905	Unrelated
GE3	M.m.dom_GE	TA7	M.m.cas_TA	-3.50902	Unrelated
GE3	M.m.dom_GE	TA8	M.m.cas_TA	-3.79721	Unrelated
GE3	M.m.dom_GE	SL1	M.spretus	-13.54	Unrelated
GE3	M.m.dom_GE	SL2	M.spretus	-13.0825	Unrelated
GE3	M.m.dom_GE	SL3	M.spretus	-13.4081	Unrelated
GE3	M.m.dom_GE	SL4	M.spretus	-13.1904	Unrelated
GE3	M.m.dom_GE	SP1	M.spicilegus	-8.14236	Unrelated
GE3	M.m.dom_GE	SP2	M.spicilegus	-8.95564	Unrelated
GE3	M.m.dom_GE	SP3	M.spicilegus	-8.82925	Unrelated
GE3	M.m.dom_GE	SP4	M.spicilegus	-8.70018	Unrelated
GE4	M.m.dom_GE	GE1	M.m.dom_GE	-0.124793	Unrelated
GE4	M.m.dom_GE	GE2	M.m.dom_GE	-0.106616	Unrelated
GE4	M.m.dom_GE	GE3	M.m.dom_GE	-0.0461036	Unrelated
GE4	M.m.dom_GE	GE5	M.m.dom_GE	-0.0936847	Unrelated
GE4	M.m.dom_GE	GE6	M.m.dom_GE	-0.0923077	Unrelated
GE4	M.m.dom_GE	GE7	M.m.dom_GE	-0.0907584	Unrelated
GE4	M.m.dom_GE	GE8	M.m.dom_GE	-0.0725063	Unrelated
GE4	M.m.dom_GE	FR1	M.m.dom_FR	-0.507949	Unrelated
GE4	M.m.dom_GE	FR2	M.m.dom_FR	-0.513601	Unrelated
GE4	M.m.dom_GE	FR3	M.m.dom_FR	-0.519549	Unrelated
GE4	M.m.dom_GE	FR4	M.m.dom_FR	-0.510089	Unrelated
GE4	M.m.dom_GE	FR5	M.m.dom_FR	-0.489882	Unrelated
GE4	M.m.dom_GE	FR6	M.m.dom_FR	-0.494833	Unrelated
GE4	M.m.dom_GE	FR7	M.m.dom_FR	-0.526233	Unrelated
GE4	M.m.dom_GE	FR8	M.m.dom_FR	-0.585938	Unrelated
GE4	M.m.dom_GE	IR1	M.m.dom_IR	-0.727273	Unrelated
GE4	M.m.dom_GE	IR2	M.m.dom_IR	-0.677862	Unrelated
GE4	M.m.dom_GE	IR3	M.m.dom_IR	-0.791269	Unrelated
GE4	M.m.dom_GE	IR4	M.m.dom_IR	-0.671983	Unrelated
GE4	M.m.dom_GE	IR5	M.m.dom_IR	-0.632966	Unrelated
GE4	M.m.dom_GE	IR6	M.m.dom_IR	-0.838951	Unrelated
GE4	M.m.dom_GE	IR7	M.m.dom_IR	-0.698413	Unrelated
GE4	M.m.dom_GE	IR8	M.m.dom_IR	-0.816875	Unrelated
GE4	M.m.dom_GE	KA1	M.m.mus_KA	-3.30459	Unrelated
GE4	M.m.dom_GE	KA2	M.m.mus_KA	-3.55163	Unrelated
GE4	M.m.dom_GE	KA3	M.m.mus_KA	-3.31923	Unrelated
GE4	M.m.dom_GE	KA4	M.m.mus_KA	-3.26095	Unrelated
GE4	M.m.dom_GE	KA5	M.m.mus_KA	-3.41613	Unrelated
GE4	M.m.dom_GE	KA6	M.m.mus_KA	-3.42206	Unrelated
GE4	M.m.dom_GE	KA7	M.m.mus_KA	-3.24547	Unrelated
GE4	M.m.dom_GE	KA8	M.m.mus_KA	-3.28849	Unrelated
GE4	M.m.dom_GE	TA1	M.m.cas_TA	-3.913	Unrelated
GE4	M.m.dom_GE	TA2	M.m.cas_TA	-4.01174	Unrelated
GE4	M.m.dom_GE	TA3	M.m.cas_TA	-3.98249	Unrelated
GE4	M.m.dom_GE	TA4	M.m.cas_TA	-3.70427	Unrelated
GE4	M.m.dom_GE	TA5	M.m.cas_TA	-3.3234	Unrelated
GE4	M.m.dom_GE	TA6	M.m.cas_TA	-3.55591	Unrelated
GE4	M.m.dom_GE	TA7	M.m.cas_TA	-3.69637	Unrelated
GE4	M.m.dom_GE	TA8	M.m.cas_TA	-4.02416	Unrelated
GE4	M.m.dom_GE	SL1	M.spretus	-14.6792	Unrelated
GE4	M.m.dom_GE	SL2	M.spretus	-14.1605	Unrelated
GE4	M.m.dom_GE	SL3	M.spretus	-14.5264	Unrelated
GE4	M.m.dom_GE	SL4	M.spretus	-14.2807	Unrelated
GE4	M.m.dom_GE	SP1	M.spicilegus	-8.5403	Unrelated
GE4	M.m.dom_GE	SP2	M.spicilegus	-9.42756	Unrelated
GE4	M.m.dom_GE	SP3	M.spicilegus	-9.2949	Unrelated
GE4	M.m.dom_GE	SP4	M.spicilegus	-9.1505	Unrelated
GE5	M.m.dom_GE	GE1	M.m.dom_GE	-0.0657523	Unrelated
GE5	M.m.dom_GE	GE2	M.m.dom_GE	-0.114754	Unrelated
GE5	M.m.dom_GE	GE3	M.m.dom_GE	-0.0667196	Unrelated
GE5	M.m.dom_GE	GE4	M.m.dom_GE	-0.0936847	Unrelated
GE5	M.m.dom_GE	GE6	M.m.dom_GE	-0.0501618	Unrelated
GE5	M.m.dom_GE	GE7	M.m.dom_GE	-0.066129	Unrelated
GE5	M.m.dom_GE	GE8	M.m.dom_GE	-0.0656339	Unrelated
GE5	M.m.dom_GE	FR1	M.m.dom_FR	-0.49093	Unrelated
GE5	M.m.dom_GE	FR2	M.m.dom_FR	-0.504348	Unrelated
GE5	M.m.dom_GE	FR3	M.m.dom_FR	-0.507457	Unrelated
GE5	M.m.dom_GE	FR4	M.m.dom_FR	-0.488802	Unrelated
GE5	M.m.dom_GE	FR5	M.m.dom_FR	-0.486597	Unrelated
GE5	M.m.dom_GE	FR6	M.m.dom_FR	-0.495161	Unrelated
GE5	M.m.dom_GE	FR7	M.m.dom_FR	-0.511914	Unrelated
GE5	M.m.dom_GE	FR8	M.m.dom_FR	-0.558223	Unrelated
GE5	M.m.dom_GE	IR1	M.m.dom_IR	-0.712452	Unrelated
GE5	M.m.dom_GE	IR2	M.m.dom_IR	-0.667002	Unrelated
GE5	M.m.dom_GE	IR3	M.m.dom_IR	-0.769782	Unrelated
GE5	M.m.dom_GE	IR4	M.m.dom_IR	-0.66181	Unrelated
GE5	M.m.dom_GE	IR5	M.m.dom_IR	-0.613903	Unrelated
GE5	M.m.dom_GE	IR6	M.m.dom_IR	-0.804896	Unrelated
GE5	M.m.dom_GE	IR7	M.m.dom_IR	-0.68091	Unrelated
GE5	M.m.dom_GE	IR8	M.m.dom_IR	-0.790363	Unrelated
GE5	M.m.dom_GE	KA1	M.m.mus_KA	-3.20487	Unrelated
GE5	M.m.dom_GE	KA2	M.m.mus_KA	-3.44646	Unrelated
GE5	M.m.dom_GE	KA3	M.m.mus_KA	-3.21688	Unrelated
GE5	M.m.dom_GE	KA4	M.m.mus_KA	-3.16245	Unrelated
GE5	M.m.dom_GE	KA5	M.m.mus_KA	-3.30675	Unrelated
GE5	M.m.dom_GE	KA6	M.m.mus_KA	-3.31877	Unrelated
GE5	M.m.dom_GE	KA7	M.m.mus_KA	-3.15363	Unrelated
GE5	M.m.dom_GE	KA8	M.m.mus_KA	-3.18748	Unrelated
GE5	M.m.dom_GE	TA1	M.m.cas_TA	-3.80043	Unrelated
GE5	M.m.dom_GE	TA2	M.m.cas_TA	-3.88601	Unrelated
GE5	M.m.dom_GE	TA3	M.m.cas_TA	-3.87358	Unrelated
GE5	M.m.dom_GE	TA4	M.m.cas_TA	-3.60887	Unrelated
GE5	M.m.dom_GE	TA5	M.m.cas_TA	-3.24208	Unrelated
GE5	M.m.dom_GE	TA6	M.m.cas_TA	-3.46659	Unrelated
GE5	M.m.dom_GE	TA7	M.m.cas_TA	-3.59836	Unrelated
GE5	M.m.dom_GE	TA8	M.m.cas_TA	-3.90921	Unrelated
GE5	M.m.dom_GE	SL1	M.spretus	-14.069	Unrelated
GE5	M.m.dom_GE	SL2	M.spretus	-13.5723	Unrelated
GE5	M.m.dom_GE	SL3	M.spretus	-13.9066	Unrelated
GE5	M.m.dom_GE	SL4	M.spretus	-13.6849	Unrelated
GE5	M.m.dom_GE	SP1	M.spicilegus	-8.31016	Unrelated
GE5	M.m.dom_GE	SP2	M.spicilegus	-9.15808	Unrelated
GE5	M.m.dom_GE	SP3	M.spicilegus	-9.02771	Unrelated
GE5	M.m.dom_GE	SP4	M.spicilegus	-8.89311	Unrelated
GE6	M.m.dom_GE	GE1	M.m.dom_GE	-0.0854392	Unrelated
GE6	M.m.dom_GE	GE2	M.m.dom_GE	-0.120619	Unrelated
GE6	M.m.dom_GE	GE3	M.m.dom_GE	-0.0327804	Unrelated
GE6	M.m.dom_GE	GE4	M.m.dom_GE	-0.0923077	Unrelated
GE6	M.m.dom_GE	GE5	M.m.dom_GE	-0.0501618	Unrelated
GE6	M.m.dom_GE	GE7	M.m.dom_GE	-0.0473136	Unrelated
GE6	M.m.dom_GE	GE8	M.m.dom_GE	-0.0826915	Unrelated
GE6	M.m.dom_GE	FR1	M.m.dom_FR	-0.485338	Unrelated
GE6	M.m.dom_GE	FR2	M.m.dom_FR	-0.505896	Unrelated
GE6	M.m.dom_GE	FR3	M.m.dom_FR	-0.492194	Unrelated
GE6	M.m.dom_GE	FR4	M.m.dom_FR	-0.509965	Unrelated
GE6	M.m.dom_GE	FR5	M.m.dom_FR	-0.487778	Unrelated
GE6	M.m.dom_GE	FR6	M.m.dom_FR	-0.492491	Unrelated
GE6	M.m.dom_GE	FR7	M.m.dom_FR	-0.514526	Unrelated
GE6	M.m.dom_GE	FR8	M.m.dom_FR	-0.549144	Unrelated
GE6	M.m.dom_GE	IR1	M.m.dom_IR	-0.703141	Unrelated
GE6	M.m.dom_GE	IR2	M.m.dom_IR	-0.64955	Unrelated
GE6	M.m.dom_GE	IR3	M.m.dom_IR	-0.752405	Unrelated
GE6	M.m.dom_GE	IR4	M.m.dom_IR	-0.66172	Unrelated
GE6	M.m.dom_GE	IR5	M.m.dom_IR	-0.594217	Unrelated
GE6	M.m.dom_GE	IR6	M.m.dom_IR	-0.812068	Unrelated
GE6	M.m.dom_GE	IR7	M.m.dom_IR	-0.654321	Unrelated
GE6	M.m.dom_GE	IR8	M.m.dom_IR	-0.772093	Unrelated
GE6	M.m.dom_GE	KA1	M.m.mus_KA	-3.20029	Unrelated
GE6	M.m.dom_GE	KA2	M.m.mus_KA	-3.43734	Unrelated
GE6	M.m.dom_GE	KA3	M.m.mus_KA	-3.21297	Unrelated
GE6	M.m.dom_GE	KA4	M.m.mus_KA	-3.16094	Unrelated
GE6	M.m.dom_GE	KA5	M.m.mus_KA	-3.30664	Unrelated
GE6	M.m.dom_GE	KA6	M.m.mus_KA	-3.32006	Unrelated
GE6	M.m.dom_GE	KA7	M.m.mus_KA	-3.149	Unrelated
GE6	M.m.dom_GE	KA8	M.m.mus_KA	-3.18726	Unrelated
GE6	M.m.dom_GE	TA1	M.m.cas_TA	-3.79563	Unrelated
GE6	M.m.dom_GE	TA2	M.m.cas_TA	-3.88105	Unrelated
GE6	M.m.dom_GE	TA3	M.m.cas_TA	-3.87695	Unrelated
GE6	M.m.dom_GE	TA4	M.m.cas_TA	-3.59967	Unrelated
GE6	M.m.dom_GE	TA5	M.m.cas_TA	-3.24531	Unrelated
GE6	M.m.dom_GE	TA6	M.m.cas_TA	-3.46208	Unrelated
GE6	M.m.dom_GE	TA7	M.m.cas_TA	-3.59943	Unrelated
GE6	M.m.dom_GE	TA8	M.m.cas_TA	-3.90155	Unrelated
GE6	M.m.dom_GE	SL1	M.spretus	-13.9607	Unrelated
GE6	M.m.dom_GE	SL2	M.spretus	-13.4733	Unrelated
GE6	M.m.dom_GE	SL3	M.spretus	-13.8027	Unrelated
GE6	M.m.dom_GE	SL4	M.spretus	-13.5778	Unrelated
GE6	M.m.dom_GE	SP1	M.spicilegus	-8.29635	Unrelated
GE6	M.m.dom_GE	SP2	M.spicilegus	-9.13619	Unrelated
GE6	M.m.dom_GE	SP3	M.spicilegus	-9.00491	Unrelated
GE6	M.m.dom_GE	SP4	M.spicilegus	-8.87329	Unrelated
GE7	M.m.dom_GE	GE1	M.m.dom_GE	-0.0763695	Unrelated
GE7	M.m.dom_GE	GE2	M.m.dom_GE	-0.0999188	Unrelated
GE7	M.m.dom_GE	GE3	M.m.dom_GE	-0.0637795	Unrelated
GE7	M.m.dom_GE	GE4	M.m.dom_GE	-0.0907584	Unrelated
GE7	M.m.dom_GE	GE5	M.m.dom_GE	-0.066129	Unrelated
GE7	M.m.dom_GE	GE6	M.m.dom_GE	-0.0473136	Unrelated
GE7	M.m.dom_GE	GE8	M.m.dom_GE	-0.040404	Unrelated
GE7	M.m.dom_GE	FR1	M.m.dom_FR	-0.485382	Unrelated
GE7	M.m.dom_GE	FR2	M.m.dom_FR	-0.490596	Unrelated
GE7	M.m.dom_GE	FR3	M.m.dom_FR	-0.48716	Unrelated
GE7	M.m.dom_GE	FR4	M.m.dom_FR	-0.501753	Unrelated
GE7	M.m.dom_GE	FR5	M.m.dom_FR	-0.475258	Unrelated
GE7	M.m.dom_GE	FR6	M.m.dom_FR	-0.481382	Unrelated
GE7	M.m.dom_GE	FR7	M.m.dom_FR	-0.514863	Unrelated
GE7	M.m.dom_GE	FR8	M.m.dom_FR	-0.554145	Unrelated
GE7	M.m.dom_GE	IR1	M.m.dom_IR	-0.704647	Unrelated
GE7	M.m.dom_GE	IR2	M.m.dom_IR	-0.655471	Unrelated
GE7	M.m.dom_GE	IR3	M.m.dom_IR	-0.761279	Unrelated
GE7	M.m.dom_GE	IR4	M.m.dom_IR	-0.663303	Unrelated
GE7	M.m.dom_GE	IR5	M.m.dom_IR	-0.595269	Unrelated
GE7	M.m.dom_GE	IR6	M.m.dom_IR	-0.803914	Unrelated
GE7	M.m.dom_GE	IR7	M.m.dom_IR	-0.668605	Unrelated
GE7	M.m.dom_GE	IR8	M.m.dom_IR	-0.774884	Unrelated
GE7	M.m.dom_GE	KA1	M.m.mus_KA	-3.18159	Unrelated
GE7	M.m.dom_GE	KA2	M.m.mus_KA	-3.41839	Unrelated
GE7	M.m.dom_GE	KA3	M.m.mus_KA	-3.19682	Unrelated
GE7	M.m.dom_GE	KA4	M.m.mus_KA	-3.15129	Unrelated
GE7	M.m.dom_GE	KA5	M.m.mus_KA	-3.28882	Unrelated
GE7	M.m.dom_GE	KA6	M.m.mus_KA	-3.302	Unrelated
GE7	M.m.dom_GE	KA7	M.m.mus_KA	-3.13523	Unrelated
GE7	M.m.dom_GE	KA8	M.m.mus_KA	-3.17394	Unrelated
GE7	M.m.dom_GE	TA1	M.m.cas_TA	-3.76857	Unrelated
GE7	M.m.dom_GE	TA2	M.m.cas_TA	-3.85541	Unrelated
GE7	M.m.dom_GE	TA3	M.m.cas_TA	-3.83549	Unrelated
GE7	M.m.dom_GE	TA4	M.m.cas_TA	-3.57085	Unrelated
GE7	M.m.dom_GE	TA5	M.m.cas_TA	-3.2169	Unrelated
GE7	M.m.dom_GE	TA6	M.m.cas_TA	-3.43531	Unrelated
GE7	M.m.dom_GE	TA7	M.m.cas_TA	-3.5698	Unrelated
GE7	M.m.dom_GE	TA8	M.m.cas_TA	-3.86962	Unrelated
GE7	M.m.dom_GE	SL1	M.spretus	-13.85	Unrelated
GE7	M.m.dom_GE	SL2	M.spretus	-13.3933	Unrelated
GE7	M.m.dom_GE	SL3	M.spretus	-13.7133	Unrelated
GE7	M.m.dom_GE	SL4	M.spretus	-13.5033	Unrelated
GE7	M.m.dom_GE	SP1	M.spicilegus	-8.26261	Unrelated
GE7	M.m.dom_GE	SP2	M.spicilegus	-9.08391	Unrelated
GE7	M.m.dom_GE	SP3	M.spicilegus	-8.96009	Unrelated
GE7	M.m.dom_GE	SP4	M.spicilegus	-8.82305	Unrelated
GE8	M.m.dom_GE	GE1	M.m.dom_GE	-0.0347615	Unrelated
GE8	M.m.dom_GE	GE2	M.m.dom_GE	-0.128953	Unrelated
GE8	M.m.dom_GE	GE3	M.m.dom_GE	-0.0939117	Unrelated
GE8	M.m.dom_GE	GE4	M.m.dom_GE	-0.0725063	Unrelated
GE8	M.m.dom_GE	GE5	M.m.dom_GE	-0.0656339	Unrelated
GE8	M.m.dom_GE	GE6	M.m.dom_GE	-0.0826915	Unrelated
GE8	M.m.dom_GE	GE7	M.m.dom_GE	-0.040404	Unrelated
GE8	M.m.dom_GE	FR1	M.m.dom_FR	-0.486179	Unrelated
GE8	M.m.dom_GE	FR2	M.m.dom_FR	-0.484752	Unrelated
GE8	M.m.dom_GE	FR3	M.m.dom_FR	-0.491939	Unrelated
GE8	M.m.dom_GE	FR4	M.m.dom_FR	-0.492126	Unrelated
GE8	M.m.dom_GE	FR5	M.m.dom_FR	-0.464752	Unrelated
GE8	M.m.dom_GE	FR6	M.m.dom_FR	-0.487199	Unrelated
GE8	M.m.dom_GE	FR7	M.m.dom_FR	-0.502503	Unrelated
GE8	M.m.dom_GE	FR8	M.m.dom_FR	-0.545309	Unrelated
GE8	M.m.dom_GE	IR1	M.m.dom_IR	-0.714732	Unrelated
GE8	M.m.dom_GE	IR2	M.m.dom_IR	-0.643624	Unrelated
GE8	M.m.dom_GE	IR3	M.m.dom_IR	-0.752152	Unrelated
GE8	M.m.dom_GE	IR4	M.m.dom_IR	-0.660896	Unrelated
GE8	M.m.dom_GE	IR5	M.m.dom_IR	-0.598562	Unrelated
GE8	M.m.dom_GE	IR6	M.m.dom_IR	-0.801611	Unrelated
GE8	M.m.dom_GE	IR7	M.m.dom_IR	-0.667587	Unrelated
GE8	M.m.dom_GE	IR8	M.m.dom_IR	-0.775216	Unrelated
GE8	M.m.dom_GE	KA1	M.m.mus_KA	-3.20057	Unrelated
GE8	M.m.dom_GE	KA2	M.m.mus_KA	-3.44049	Unrelated
GE8	M.m.dom_GE	KA3	M.m.mus_KA	-3.21655	Unrelated
GE8	M.m.dom_GE	KA4	M.m.mus_KA	-3.16274	Unrelated
GE8	M.m.dom_GE	KA5	M.m.mus_KA	-3.30175	Unrelated
GE8	M.m.dom_GE	KA6	M.m.mus_KA	-3.31678	Unrelated
GE8	M.m.dom_GE	KA7	M.m.mus_KA	-3.15071	Unrelated
GE8	M.m.dom_GE	KA8	M.m.mus_KA	-3.18602	Unrelated
GE8	M.m.dom_GE	TA1	M.m.cas_TA	-3.77927	Unrelated
GE8	M.m.dom_GE	TA2	M.m.cas_TA	-3.87654	Unrelated
GE8	M.m.dom_GE	TA3	M.m.cas_TA	-3.85103	Unrelated
GE8	M.m.dom_GE	TA4	M.m.cas_TA	-3.58296	Unrelated
GE8	M.m.dom_GE	TA5	M.m.cas_TA	-3.22554	Unrelated
GE8	M.m.dom_GE	TA6	M.m.cas_TA	-3.44821	Unrelated
GE8	M.m.dom_GE	TA7	M.m.cas_TA	-3.57778	Unrelated
GE8	M.m.dom_GE	TA8	M.m.cas_TA	-3.88986	Unrelated
GE8	M.m.dom_GE	SL1	M.spretus	-14.0753	Unrelated
GE8	M.m.dom_GE	SL2	M.spretus	-13.5908	Unrelated
GE8	M.m.dom_GE	SL3	M.spretus	-13.9222	Unrelated
GE8	M.m.dom_GE	SL4	M.spretus	-13.699	Unrelated
GE8	M.m.dom_GE	SP1	M.spicilegus	-8.32732	Unrelated
GE8	M.m.dom_GE	SP2	M.spicilegus	-9.16686	Unrelated
GE8	M.m.dom_GE	SP3	M.spicilegus	-9.03652	Unrelated
GE8	M.m.dom_GE	SP4	M.spicilegus	-8.90373	Unrelated
FR1	M.m.dom_FR	GE1	M.m.dom_GE	-0.454068	Unrelated
FR1	M.m.dom_FR	GE2	M.m.dom_GE	-0.497717	Unrelated
FR1	M.m.dom_FR	GE3	M.m.dom_GE	-0.460828	Unrelated
FR1	M.m.dom_FR	GE4	M.m.dom_GE	-0.507949	Unrelated
FR1	M.m.dom_FR	GE5	M.m.dom_GE	-0.49093	Unrelated
FR1	M.m.dom_FR	GE6	M.m.dom_GE	-0.485338	Unrelated
FR1	M.m.dom_FR	GE7	M.m.dom_GE	-0.485382	Unrelated
FR1	M.m.dom_FR	GE8	M.m.dom_GE	-0.486179	Unrelated
FR1	M.m.dom_FR	FR2	M.m.dom_FR	-0.0665931	Unrelated
FR1	M.m.dom_FR	FR3	M.m.dom_FR	-0.0913743	Unrelated
FR1	M.m.dom_FR	FR4	M.m.dom_FR	-0.0987925	Unrelated
FR1	M.m.dom_FR	FR5	M.m.dom_FR	-0.0695894	Unrelated
FR1	M.m.dom_FR	FR6	M.m.dom_FR	-0.112956	Unrelated
FR1	M.m.dom_FR	FR7	M.m.dom_FR	-0.111111	Unrelated
FR1	M.m.dom_FR	FR8	M.m.dom_FR	-0.127279	Unrelated
FR1	M.m.dom_FR	IR1	M.m.dom_IR	-0.660046	Unrelated
FR1	M.m.dom_FR	IR2	M.m.dom_IR	-0.601954	Unrelated
FR1	M.m.dom_FR	IR3	M.m.dom_IR	-0.707481	Unrelated
FR1	M.m.dom_FR	IR4	M.m.dom_IR	-0.612934	Unrelated
FR1	M.m.dom_FR	IR5	M.m.dom_IR	-0.571341	Unrelated
FR1	M.m.dom_FR	IR6	M.m.dom_IR	-0.751111	Unrelated
FR1	M.m.dom_FR	IR7	M.m.dom_IR	-0.61521	Unrelated
FR1	M.m.dom_FR	IR8	M.m.dom_IR	-0.73358	Unrelated
FR1	M.m.dom_FR	KA1	M.m.mus_KA	-2.9453	Unrelated
FR1	M.m.dom_FR	KA2	M.m.mus_KA	-3.15154	Unrelated
FR1	M.m.dom_FR	KA3	M.m.mus_KA	-2.92657	Unrelated
FR1	M.m.dom_FR	KA4	M.m.mus_KA	-2.89616	Unrelated
FR1	M.m.dom_FR	KA5	M.m.mus_KA	-3.02601	Unrelated
FR1	M.m.dom_FR	KA6	M.m.mus_KA	-3.0505	Unrelated
FR1	M.m.dom_FR	KA7	M.m.mus_KA	-2.88417	Unrelated
FR1	M.m.dom_FR	KA8	M.m.mus_KA	-2.91016	Unrelated
FR1	M.m.dom_FR	TA1	M.m.cas_TA	-3.47727	Unrelated
FR1	M.m.dom_FR	TA2	M.m.cas_TA	-3.55205	Unrelated
FR1	M.m.dom_FR	TA3	M.m.cas_TA	-3.53868	Unrelated
FR1	M.m.dom_FR	TA4	M.m.cas_TA	-3.31465	Unrelated
FR1	M.m.dom_FR	TA5	M.m.cas_TA	-2.99155	Unrelated
FR1	M.m.dom_FR	TA6	M.m.cas_TA	-3.18851	Unrelated
FR1	M.m.dom_FR	TA7	M.m.cas_TA	-3.31033	Unrelated
FR1	M.m.dom_FR	TA8	M.m.cas_TA	-3.56867	Unrelated
FR1	M.m.dom_FR	SL1	M.spretus	-12.5591	Unrelated
FR1	M.m.dom_FR	SL2	M.spretus	-12.1461	Unrelated
FR1	M.m.dom_FR	SL3	M.spretus	-12.4294	Unrelated
FR1	M.m.dom_FR	SL4	M.spretus	-12.2464	Unrelated
FR1	M.m.dom_FR	SP1	M.spicilegus	-7.7859	Unrelated
FR1	M.m.dom_FR	SP2	M.spicilegus	-8.52941	Unrelated
FR1	M.m.dom_FR	SP3	M.spicilegus	-8.41991	Unrelated
FR1	M.m.dom_FR	SP4	M.spicilegus	-8.29829	Unrelated
FR2	M.m.dom_FR	GE1	M.m.dom_GE	-0.460996	Unrelated
FR2	M.m.dom_FR	GE2	M.m.dom_GE	-0.499602	Unrelated
FR2	M.m.dom_FR	GE3	M.m.dom_GE	-0.46834	Unrelated
FR2	M.m.dom_FR	GE4	M.m.dom_GE	-0.513601	Unrelated
FR2	M.m.dom_FR	GE5	M.m.dom_GE	-0.504348	Unrelated
FR2	M.m.dom_FR	GE6	M.m.dom_GE	-0.505896	Unrelated
FR2	M.m.dom_FR	GE7	M.m.dom_GE	-0.490596	Unrelated
FR2	M.m.dom_FR	GE8	M.m.dom_GE	-0.484752	Unrelated
FR2	M.m.dom_FR	FR1	M.m.dom_FR	-0.0665931	Unrelated
FR2	M.m.dom_FR	FR3	M.m.dom_FR	-0.0885496	Unrelated
FR2	M.m.dom_FR	FR4	M.m.dom_FR	-0.0485288	Unrelated
FR2	M.m.dom_FR	FR5	M.m.dom_FR	-0.100073	Unrelated
FR2	M.m.dom_FR	FR6	M.m.dom_FR	-0.0549906	Unrelated
FR2	M.m.dom_FR	FR7	M.m.dom_FR	-0.121541	Unrelated
FR2	M.m.dom_FR	FR8	M.m.dom_FR	-0.115519	Unrelated
FR2	M.m.dom_FR	IR1	M.m.dom_IR	-0.662606	Unrelated
FR2	M.m.dom_FR	IR2	M.m.dom_IR	-0.612692	Unrelated
FR2	M.m.dom_FR	IR3	M.m.dom_IR	-0.706108	Unrelated
FR2	M.m.dom_FR	IR4	M.m.dom_IR	-0.612967	Unrelated
FR2	M.m.dom_FR	IR5	M.m.dom_IR	-0.571429	Unrelated
FR2	M.m.dom_FR	IR6	M.m.dom_IR	-0.747597	Unrelated
FR2	M.m.dom_FR	IR7	M.m.dom_IR	-0.626093	Unrelated
FR2	M.m.dom_FR	IR8	M.m.dom_IR	-0.728356	Unrelated
FR2	M.m.dom_FR	KA1	M.m.mus_KA	-3.12046	Unrelated
FR2	M.m.dom_FR	KA2	M.m.mus_KA	-3.35101	Unrelated
FR2	M.m.dom_FR	KA3	M.m.mus_KA	-3.13646	Unrelated
FR2	M.m.dom_FR	KA4	M.m.mus_KA	-3.0851	Unrelated
FR2	M.m.dom_FR	KA5	M.m.mus_KA	-3.23121	Unrelated
FR2	M.m.dom_FR	KA6	M.m.mus_KA	-3.23148	Unrelated
FR2	M.m.dom_FR	KA7	M.m.mus_KA	-3.08112	Unrelated
FR2	M.m.dom_FR	KA8	M.m.mus_KA	-3.10952	Unrelated
FR2	M.m.dom_FR	TA1	M.m.cas_TA	-3.69231	Unrelated
FR2	M.m.dom_FR	TA2	M.m.cas_TA	-3.77051	Unrelated
FR2	M.m.dom_FR	TA3	M.m.cas_TA	-3.76289	Unrelated
FR2	M.m.dom_FR	TA4	M.m.cas_TA	-3.51077	Unrelated
FR2	M.m.dom_FR	TA5	M.m.cas_TA	-3.16336	Unrelated
FR2	M.m.dom_FR	TA6	M.m.cas_TA	-3.37003	Unrelated
FR2	M.m.dom_FR	TA7	M.m.cas_TA	-3.51177	Unrelated
FR2	M.m.dom_FR	TA8	M.m.cas_TA	-3.79528	Unrelated
FR2	M.m.dom_FR	SL1	M.spretus	-13.431	Unrelated
FR2	M.m.dom_FR	SL2	M.spretus	-12.9662	Unrelated
FR2	M.m.dom_FR	SL3	M.spretus	-13.2825	Unrelated
FR2	M.m.dom_FR	SL4	M.spretus	-13.0709	Unrelated
FR2	M.m.dom_FR	SP1	M.spicilegus	-8.10496	Unrelated
FR2	M.m.dom_FR	SP2	M.spicilegus	-8.90868	Unrelated
FR2	M.m.dom_FR	SP3	M.spicilegus	-8.78862	Unrelated
FR2	M.m.dom_FR	SP4	M.spicilegus	-8.6576	Unrelated
FR3	M.m.dom_FR	GE1	M.m.dom_GE	-0.438303	Unrelated
FR3	M.m.dom_FR	GE2	M.m.dom_GE	-0.486166	Unrelated
FR3	M.m.dom_FR	GE3	M.m.dom_GE	-0.457439	Unrelated
FR3	M.m.dom_FR	GE4	M.m.dom_GE	-0.519549	Unrelated
FR3	M.m.dom_FR	GE5	M.m.dom_GE	-0.507457	Unrelated
FR3	M.m.dom_FR	GE6	M.m.dom_GE	-0.492194	Unrelated
FR3	M.m.dom_FR	GE7	M.m.dom_GE	-0.48716	Unrelated
FR3	M.m.dom_FR	GE8	M.m.dom_GE	-0.491939	Unrelated
FR3	M.m.dom_FR	FR1	M.m.dom_FR	-0.0913743	Unrelated
FR3	M.m.dom_FR	FR2	M.m.dom_FR	-0.0885496	Unrelated
FR3	M.m.dom_FR	FR4	M.m.dom_FR	-0.0903226	Unrelated
FR3	M.m.dom_FR	FR5	M.m.dom_FR	-0.0868156	Unrelated
FR3	M.m.dom_FR	FR6	M.m.dom_FR	-0.0894126	Unrelated
FR3	M.m.dom_FR	FR7	M.m.dom_FR	-0.127415	Unrelated
FR3	M.m.dom_FR	FR8	M.m.dom_FR	-0.105832	Unrelated
FR3	M.m.dom_FR	IR1	M.m.dom_IR	-0.673058	Unrelated
FR3	M.m.dom_FR	IR2	M.m.dom_IR	-0.617886	Unrelated
FR3	M.m.dom_FR	IR3	M.m.dom_IR	-0.710371	Unrelated
FR3	M.m.dom_FR	IR4	M.m.dom_IR	-0.622493	Unrelated
FR3	M.m.dom_FR	IR5	M.m.dom_IR	-0.580533	Unrelated
FR3	M.m.dom_FR	IR6	M.m.dom_IR	-0.737531	Unrelated
FR3	M.m.dom_FR	IR7	M.m.dom_IR	-0.618984	Unrelated
FR3	M.m.dom_FR	IR8	M.m.dom_IR	-0.741205	Unrelated
FR3	M.m.dom_FR	KA1	M.m.mus_KA	-3.0975	Unrelated
FR3	M.m.dom_FR	KA2	M.m.mus_KA	-3.31723	Unrelated
FR3	M.m.dom_FR	KA3	M.m.mus_KA	-3.11801	Unrelated
FR3	M.m.dom_FR	KA4	M.m.mus_KA	-3.07663	Unrelated
FR3	M.m.dom_FR	KA5	M.m.mus_KA	-3.21213	Unrelated
FR3	M.m.dom_FR	KA6	M.m.mus_KA	-3.20867	Unrelated
FR3	M.m.dom_FR	KA7	M.m.mus_KA	-3.06998	Unrelated
FR3	M.m.dom_FR	KA8	M.m.mus_KA	-3.09393	Unrelated
FR3	M.m.dom_FR	TA1	M.m.cas_TA	-3.65519	Unrelated
FR3	M.m.dom_FR	TA2	M.m.cas_TA	-3.73893	Unrelated
FR3	M.m.dom_FR	TA3	M.m.cas_TA	-3.73154	Unrelated
FR3	M.m.dom_FR	TA4	M.m.cas_TA	-3.47742	Unrelated
FR3	M.m.dom_FR	TA5	M.m.cas_TA	-3.13384	Unrelated
FR3	M.m.dom_FR	TA6	M.m.cas_TA	-3.3303	Unrelated
FR3	M.m.dom_FR	TA7	M.m.cas_TA	-3.47881	Unrelated
FR3	M.m.dom_FR	TA8	M.m.cas_TA	-3.75669	Unrelated
FR3	M.m.dom_FR	SL1	M.spretus	-13.3148	Unrelated
FR3	M.m.dom_FR	SL2	M.spretus	-12.869	Unrelated
FR3	M.m.dom_FR	SL3	M.spretus	-13.1777	Unrelated
FR3	M.m.dom_FR	SL4	M.spretus	-12.9732	Unrelated
FR3	M.m.dom_FR	SP1	M.spicilegus	-8.06259	Unrelated
FR3	M.m.dom_FR	SP2	M.spicilegus	-8.85985	Unrelated
FR3	M.m.dom_FR	SP3	M.spicilegus	-8.73128	Unrelated
FR3	M.m.dom_FR	SP4	M.spicilegus	-8.60829	Unrelated
FR4	M.m.dom_FR	GE1	M.m.dom_GE	-0.437256	Unrelated
FR4	M.m.dom_FR	GE2	M.m.dom_GE	-0.510882	Unrelated
FR4	M.m.dom_FR	GE3	M.m.dom_GE	-0.471017	Unrelated
FR4	M.m.dom_FR	GE4	M.m.dom_GE	-0.510089	Unrelated
FR4	M.m.dom_FR	GE5	M.m.dom_GE	-0.488802	Unrelated
FR4	M.m.dom_FR	GE6	M.m.dom_GE	-0.509965	Unrelated
FR4	M.m.dom_FR	GE7	M.m.dom_GE	-0.501753	Unrelated
FR4	M.m.dom_FR	GE8	M.m.dom_GE	-0.492126	Unrelated
FR4	M.m.dom_FR	FR1	M.m.dom_FR	-0.0987925	Unrelated
FR4	M.m.dom_FR	FR2	M.m.dom_FR	-0.0485288	Unrelated
FR4	M.m.dom_FR	FR3	M.m.dom_FR	-0.0903226	Unrelated
FR4	M.m.dom_FR	FR5	M.m.dom_FR	-0.142084	Unrelated
FR4	M.m.dom_FR	FR6	M.m.dom_FR	-0.0868914	Unrelated
FR4	M.m.dom_FR	FR7	M.m.dom_FR	-0.133879	Unrelated
FR4	M.m.dom_FR	FR8	M.m.dom_FR	-0.12993	Unrelated
FR4	M.m.dom_FR	IR1	M.m.dom_IR	-0.675084	Unrelated
FR4	M.m.dom_FR	IR2	M.m.dom_IR	-0.614258	Unrelated
FR4	M.m.dom_FR	IR3	M.m.dom_IR	-0.715278	Unrelated
FR4	M.m.dom_FR	IR4	M.m.dom_IR	-0.615537	Unrelated
FR4	M.m.dom_FR	IR5	M.m.dom_IR	-0.578864	Unrelated
FR4	M.m.dom_FR	IR6	M.m.dom_IR	-0.733357	Unrelated
FR4	M.m.dom_FR	IR7	M.m.dom_IR	-0.633322	Unrelated
FR4	M.m.dom_FR	IR8	M.m.dom_IR	-0.733961	Unrelated
FR4	M.m.dom_FR	KA1	M.m.mus_KA	-3.09344	Unrelated
FR4	M.m.dom_FR	KA2	M.m.mus_KA	-3.32125	Unrelated
FR4	M.m.dom_FR	KA3	M.m.mus_KA	-3.11952	Unrelated
FR4	M.m.dom_FR	KA4	M.m.mus_KA	-3.07153	Unrelated
FR4	M.m.dom_FR	KA5	M.m.mus_KA	-3.21272	Unrelated
FR4	M.m.dom_FR	KA6	M.m.mus_KA	-3.21068	Unrelated
FR4	M.m.dom_FR	KA7	M.m.mus_KA	-3.06113	Unrelated
FR4	M.m.dom_FR	KA8	M.m.mus_KA	-3.09646	Unrelated
FR4	M.m.dom_FR	TA1	M.m.cas_TA	-3.65559	Unrelated
FR4	M.m.dom_FR	TA2	M.m.cas_TA	-3.73691	Unrelated
FR4	M.m.dom_FR	TA3	M.m.cas_TA	-3.73205	Unrelated
FR4	M.m.dom_FR	TA4	M.m.cas_TA	-3.48076	Unrelated
FR4	M.m.dom_FR	TA5	M.m.cas_TA	-3.12961	Unrelated
FR4	M.m.dom_FR	TA6	M.m.cas_TA	-3.33713	Unrelated
FR4	M.m.dom_FR	TA7	M.m.cas_TA	-3.47621	Unrelated
FR4	M.m.dom_FR	TA8	M.m.cas_TA	-3.75596	Unrelated
FR4	M.m.dom_FR	SL1	M.spretus	-13.3722	Unrelated
FR4	M.m.dom_FR	SL2	M.spretus	-12.9103	Unrelated
FR4	M.m.dom_FR	SL3	M.spretus	-13.2203	Unrelated
FR4	M.m.dom_FR	SL4	M.spretus	-13.016	Unrelated
FR4	M.m.dom_FR	SP1	M.spicilegus	-8.08319	Unrelated
FR4	M.m.dom_FR	SP2	M.spicilegus	-8.88835	Unrelated
FR4	M.m.dom_FR	SP3	M.spicilegus	-8.76112	Unrelated
FR4	M.m.dom_FR	SP4	M.spicilegus	-8.63384	Unrelated
FR5	M.m.dom_FR	GE1	M.m.dom_GE	-0.453639	Unrelated
FR5	M.m.dom_FR	GE2	M.m.dom_GE	-0.476387	Unrelated
FR5	M.m.dom_FR	GE3	M.m.dom_GE	-0.450838	Unrelated
FR5	M.m.dom_FR	GE4	M.m.dom_GE	-0.489882	Unrelated
FR5	M.m.dom_FR	GE5	M.m.dom_GE	-0.486597	Unrelated
FR5	M.m.dom_FR	GE6	M.m.dom_GE	-0.487778	Unrelated
FR5	M.m.dom_FR	GE7	M.m.dom_GE	-0.475258	Unrelated
FR5	M.m.dom_FR	GE8	M.m.dom_GE	-0.464752	Unrelated
FR5	M.m.dom_FR	FR1	M.m.dom_FR	-0.0695894	Unrelated
FR5	M.m.dom_FR	FR2	M.m.dom_FR	-0.100073	Unrelated
FR5	M.m.dom_FR	FR3	M.m.dom_FR	-0.0868156	Unrelated
FR5	M.m.dom_FR	FR4	M.m.dom_FR	-0.142084	Unrelated
FR5	M.m.dom_FR	FR6	M.m.dom_FR	-0.0875133	Unrelated
FR5	M.m.dom_FR	FR7	M.m.dom_FR	-0.0628975	Unrelated
FR5	M.m.dom_FR	FR8	M.m.dom_FR	-0.141547	Unrelated
FR5	M.m.dom_FR	IR1	M.m.dom_IR	-0.625522	Unrelated
FR5	M.m.dom_FR	IR2	M.m.dom_IR	-0.570806	Unrelated
FR5	M.m.dom_FR	IR3	M.m.dom_IR	-0.667991	Unrelated
FR5	M.m.dom_FR	IR4	M.m.dom_IR	-0.57408	Unrelated
FR5	M.m.dom_FR	IR5	M.m.dom_IR	-0.532503	Unrelated
FR5	M.m.dom_FR	IR6	M.m.dom_IR	-0.692749	Unrelated
FR5	M.m.dom_FR	IR7	M.m.dom_IR	-0.583067	Unrelated
FR5	M.m.dom_FR	IR8	M.m.dom_IR	-0.683283	Unrelated
FR5	M.m.dom_FR	KA1	M.m.mus_KA	-2.89073	Unrelated
FR5	M.m.dom_FR	KA2	M.m.mus_KA	-3.09474	Unrelated
FR5	M.m.dom_FR	KA3	M.m.mus_KA	-2.88208	Unrelated
FR5	M.m.dom_FR	KA4	M.m.mus_KA	-2.85041	Unrelated
FR5	M.m.dom_FR	KA5	M.m.mus_KA	-2.96683	Unrelated
FR5	M.m.dom_FR	KA6	M.m.mus_KA	-2.99288	Unrelated
FR5	M.m.dom_FR	KA7	M.m.mus_KA	-2.83361	Unrelated
FR5	M.m.dom_FR	KA8	M.m.mus_KA	-2.86702	Unrelated
FR5	M.m.dom_FR	TA1	M.m.cas_TA	-3.41248	Unrelated
FR5	M.m.dom_FR	TA2	M.m.cas_TA	-3.48226	Unrelated
FR5	M.m.dom_FR	TA3	M.m.cas_TA	-3.46947	Unrelated
FR5	M.m.dom_FR	TA4	M.m.cas_TA	-3.24455	Unrelated
FR5	M.m.dom_FR	TA5	M.m.cas_TA	-2.93715	Unrelated
FR5	M.m.dom_FR	TA6	M.m.cas_TA	-3.12374	Unrelated
FR5	M.m.dom_FR	TA7	M.m.cas_TA	-3.25122	Unrelated
FR5	M.m.dom_FR	TA8	M.m.cas_TA	-3.49684	Unrelated
FR5	M.m.dom_FR	SL1	M.spretus	-12.2535	Unrelated
FR5	M.m.dom_FR	SL2	M.spretus	-11.8554	Unrelated
FR5	M.m.dom_FR	SL3	M.spretus	-12.1254	Unrelated
FR5	M.m.dom_FR	SL4	M.spretus	-11.9445	Unrelated
FR5	M.m.dom_FR	SP1	M.spicilegus	-7.66003	Unrelated
FR5	M.m.dom_FR	SP2	M.spicilegus	-8.38119	Unrelated
FR5	M.m.dom_FR	SP3	M.spicilegus	-8.26869	Unrelated
FR5	M.m.dom_FR	SP4	M.spicilegus	-8.1562	Unrelated
FR6	M.m.dom_FR	GE1	M.m.dom_GE	-0.458141	Unrelated
FR6	M.m.dom_FR	GE2	M.m.dom_GE	-0.497466	Unrelated
FR6	M.m.dom_FR	GE3	M.m.dom_GE	-0.464624	Unrelated
FR6	M.m.dom_FR	GE4	M.m.dom_GE	-0.494833	Unrelated
FR6	M.m.dom_FR	GE5	M.m.dom_GE	-0.495161	Unrelated
FR6	M.m.dom_FR	GE6	M.m.dom_GE	-0.492491	Unrelated
FR6	M.m.dom_FR	GE7	M.m.dom_GE	-0.481382	Unrelated
FR6	M.m.dom_FR	GE8	M.m.dom_GE	-0.487199	Unrelated
FR6	M.m.dom_FR	FR1	M.m.dom_FR	-0.112956	Unrelated
FR6	M.m.dom_FR	FR2	M.m.dom_FR	-0.0549906	Unrelated
FR6	M.m.dom_FR	FR3	M.m.dom_FR	-0.0894126	Unrelated
FR6	M.m.dom_FR	FR4	M.m.dom_FR	-0.0868914	Unrelated
FR6	M.m.dom_FR	FR5	M.m.dom_FR	-0.0875133	Unrelated
FR6	M.m.dom_FR	FR7	M.m.dom_FR	-0.108544	Unrelated
FR6	M.m.dom_FR	FR8	M.m.dom_FR	-0.130716	Unrelated
FR6	M.m.dom_FR	IR1	M.m.dom_IR	-0.651596	Unrelated
FR6	M.m.dom_FR	IR2	M.m.dom_IR	-0.588746	Unrelated
FR6	M.m.dom_FR	IR3	M.m.dom_IR	-0.681631	Unrelated
FR6	M.m.dom_FR	IR4	M.m.dom_IR	-0.597854	Unrelated
FR6	M.m.dom_FR	IR5	M.m.dom_IR	-0.558482	Unrelated
FR6	M.m.dom_FR	IR6	M.m.dom_IR	-0.721523	Unrelated
FR6	M.m.dom_FR	IR7	M.m.dom_IR	-0.602246	Unrelated
FR6	M.m.dom_FR	IR8	M.m.dom_IR	-0.718513	Unrelated
FR6	M.m.dom_FR	KA1	M.m.mus_KA	-3.02091	Unrelated
FR6	M.m.dom_FR	KA2	M.m.mus_KA	-3.24169	Unrelated
FR6	M.m.dom_FR	KA3	M.m.mus_KA	-3.03103	Unrelated
FR6	M.m.dom_FR	KA4	M.m.mus_KA	-2.99045	Unrelated
FR6	M.m.dom_FR	KA5	M.m.mus_KA	-3.12513	Unrelated
FR6	M.m.dom_FR	KA6	M.m.mus_KA	-3.12535	Unrelated
FR6	M.m.dom_FR	KA7	M.m.mus_KA	-2.97898	Unrelated
FR6	M.m.dom_FR	KA8	M.m.mus_KA	-3.01199	Unrelated
FR6	M.m.dom_FR	TA1	M.m.cas_TA	-3.58609	Unrelated
FR6	M.m.dom_FR	TA2	M.m.cas_TA	-3.66085	Unrelated
FR6	M.m.dom_FR	TA3	M.m.cas_TA	-3.6573	Unrelated
FR6	M.m.dom_FR	TA4	M.m.cas_TA	-3.41657	Unrelated
FR6	M.m.dom_FR	TA5	M.m.cas_TA	-3.08138	Unrelated
FR6	M.m.dom_FR	TA6	M.m.cas_TA	-3.28025	Unrelated
FR6	M.m.dom_FR	TA7	M.m.cas_TA	-3.41602	Unrelated
FR6	M.m.dom_FR	TA8	M.m.cas_TA	-3.6848	Unrelated
FR6	M.m.dom_FR	SL1	M.spretus	-13.0057	Unrelated
FR6	M.m.dom_FR	SL2	M.spretus	-12.5703	Unrelated
FR6	M.m.dom_FR	SL3	M.spretus	-12.8644	Unrelated
FR6	M.m.dom_FR	SL4	M.spretus	-12.6695	Unrelated
FR6	M.m.dom_FR	SP1	M.spicilegus	-7.95505	Unrelated
FR6	M.m.dom_FR	SP2	M.spicilegus	-8.72367	Unrelated
FR6	M.m.dom_FR	SP3	M.spicilegus	-8.60638	Unrelated
FR6	M.m.dom_FR	SP4	M.spicilegus	-8.49075	Unrelated
FR7	M.m.dom_FR	GE1	M.m.dom_GE	-0.494091	Unrelated
FR7	M.m.dom_FR	GE2	M.m.dom_GE	-0.519737	Unrelated
FR7	M.m.dom_FR	GE3	M.m.dom_GE	-0.474455	Unrelated
FR7	M.m.dom_FR	GE4	M.m.dom_GE	-0.526233	Unrelated
FR7	M.m.dom_FR	GE5	M.m.dom_GE	-0.511914	Unrelated
FR7	M.m.dom_FR	GE6	M.m.dom_GE	-0.514526	Unrelated
FR7	M.m.dom_FR	GE7	M.m.dom_GE	-0.514863	Unrelated
FR7	M.m.dom_FR	GE8	M.m.dom_GE	-0.502503	Unrelated
FR7	M.m.dom_FR	FR1	M.m.dom_FR	-0.111111	Unrelated
FR7	M.m.dom_FR	FR2	M.m.dom_FR	-0.121541	Unrelated
FR7	M.m.dom_FR	FR3	M.m.dom_FR	-0.127415	Unrelated
FR7	M.m.dom_FR	FR4	M.m.dom_FR	-0.133879	Unrelated
FR7	M.m.dom_FR	FR5	M.m.dom_FR	-0.0628975	Unrelated
FR7	M.m.dom_FR	FR6	M.m.dom_FR	-0.108544	Unrelated
FR7	M.m.dom_FR	FR8	M.m.dom_FR	-0.144154	Unrelated
FR7	M.m.dom_FR	IR1	M.m.dom_IR	-0.668318	Unrelated
FR7	M.m.dom_FR	IR2	M.m.dom_IR	-0.60179	Unrelated
FR7	M.m.dom_FR	IR3	M.m.dom_IR	-0.700034	Unrelated
FR7	M.m.dom_FR	IR4	M.m.dom_IR	-0.608078	Unrelated
FR7	M.m.dom_FR	IR5	M.m.dom_IR	-0.572631	Unrelated
FR7	M.m.dom_FR	IR6	M.m.dom_IR	-0.753905	Unrelated
FR7	M.m.dom_FR	IR7	M.m.dom_IR	-0.626067	Unrelated
FR7	M.m.dom_FR	IR8	M.m.dom_IR	-0.735726	Unrelated
FR7	M.m.dom_FR	KA1	M.m.mus_KA	-3.03781	Unrelated
FR7	M.m.dom_FR	KA2	M.m.mus_KA	-3.2465	Unrelated
FR7	M.m.dom_FR	KA3	M.m.mus_KA	-3.01762	Unrelated
FR7	M.m.dom_FR	KA4	M.m.mus_KA	-2.97086	Unrelated
FR7	M.m.dom_FR	KA5	M.m.mus_KA	-3.10141	Unrelated
FR7	M.m.dom_FR	KA6	M.m.mus_KA	-3.14301	Unrelated
FR7	M.m.dom_FR	KA7	M.m.mus_KA	-2.96396	Unrelated
FR7	M.m.dom_FR	KA8	M.m.mus_KA	-2.99626	Unrelated
FR7	M.m.dom_FR	TA1	M.m.cas_TA	-3.60106	Unrelated
FR7	M.m.dom_FR	TA2	M.m.cas_TA	-3.66969	Unrelated
FR7	M.m.dom_FR	TA3	M.m.cas_TA	-3.66079	Unrelated
FR7	M.m.dom_FR	TA4	M.m.cas_TA	-3.42514	Unrelated
FR7	M.m.dom_FR	TA5	M.m.cas_TA	-3.08512	Unrelated
FR7	M.m.dom_FR	TA6	M.m.cas_TA	-3.28943	Unrelated
FR7	M.m.dom_FR	TA7	M.m.cas_TA	-3.41877	Unrelated
FR7	M.m.dom_FR	TA8	M.m.cas_TA	-3.69092	Unrelated
FR7	M.m.dom_FR	SL1	M.spretus	-12.9153	Unrelated
FR7	M.m.dom_FR	SL2	M.spretus	-12.4785	Unrelated
FR7	M.m.dom_FR	SL3	M.spretus	-12.7694	Unrelated
FR7	M.m.dom_FR	SL4	M.spretus	-12.5722	Unrelated
FR7	M.m.dom_FR	SP1	M.spicilegus	-7.9315	Unrelated
FR7	M.m.dom_FR	SP2	M.spicilegus	-8.69096	Unrelated
FR7	M.m.dom_FR	SP3	M.spicilegus	-8.57523	Unrelated
FR7	M.m.dom_FR	SP4	M.spicilegus	-8.45917	Unrelated
FR8	M.m.dom_FR	GE1	M.m.dom_GE	-0.518254	Unrelated
FR8	M.m.dom_FR	GE2	M.m.dom_GE	-0.559049	Unrelated
FR8	M.m.dom_FR	GE3	M.m.dom_GE	-0.51739	Unrelated
FR8	M.m.dom_FR	GE4	M.m.dom_GE	-0.585938	Unrelated
FR8	M.m.dom_FR	GE5	M.m.dom_GE	-0.558223	Unrelated
FR8	M.m.dom_FR	GE6	M.m.dom_GE	-0.549144	Unrelated
FR8	M.m.dom_FR	GE7	M.m.dom_GE	-0.554145	Unrelated
FR8	M.m.dom_FR	GE8	M.m.dom_GE	-0.545309	Unrelated
FR8	M.m.dom_FR	FR1	M.m.dom_FR	-0.127279	Unrelated
FR8	M.m.dom_FR	FR2	M.m.dom_FR	-0.115519	Unrelated
FR8	M.m.dom_FR	FR3	M.m.dom_FR	-0.105832	Unrelated
FR8	M.m.dom_FR	FR4	M.m.dom_FR	-0.12993	Unrelated
FR8	M.m.dom_FR	FR5	M.m.dom_FR	-0.141547	Unrelated
FR8	M.m.dom_FR	FR6	M.m.dom_FR	-0.130716	Unrelated
FR8	M.m.dom_FR	FR7	M.m.dom_FR	-0.144154	Unrelated
FR8	M.m.dom_FR	IR1	M.m.dom_IR	-0.703146	Unrelated
FR8	M.m.dom_FR	IR2	M.m.dom_IR	-0.651024	Unrelated
FR8	M.m.dom_FR	IR3	M.m.dom_IR	-0.742766	Unrelated
FR8	M.m.dom_FR	IR4	M.m.dom_IR	-0.654078	Unrelated
FR8	M.m.dom_FR	IR5	M.m.dom_IR	-0.603221	Unrelated
FR8	M.m.dom_FR	IR6	M.m.dom_IR	-0.789777	Unrelated
FR8	M.m.dom_FR	IR7	M.m.dom_IR	-0.660211	Unrelated
FR8	M.m.dom_FR	IR8	M.m.dom_IR	-0.779943	Unrelated
FR8	M.m.dom_FR	KA1	M.m.mus_KA	-3.18779	Unrelated
FR8	M.m.dom_FR	KA2	M.m.mus_KA	-3.42176	Unrelated
FR8	M.m.dom_FR	KA3	M.m.mus_KA	-3.20253	Unrelated
FR8	M.m.dom_FR	KA4	M.m.mus_KA	-3.15836	Unrelated
FR8	M.m.dom_FR	KA5	M.m.mus_KA	-3.29594	Unrelated
FR8	M.m.dom_FR	KA6	M.m.mus_KA	-3.3068	Unrelated
FR8	M.m.dom_FR	KA7	M.m.mus_KA	-3.14131	Unrelated
FR8	M.m.dom_FR	KA8	M.m.mus_KA	-3.17736	Unrelated
FR8	M.m.dom_FR	TA1	M.m.cas_TA	-3.78611	Unrelated
FR8	M.m.dom_FR	TA2	M.m.cas_TA	-3.86348	Unrelated
FR8	M.m.dom_FR	TA3	M.m.cas_TA	-3.84497	Unrelated
FR8	M.m.dom_FR	TA4	M.m.cas_TA	-3.59515	Unrelated
FR8	M.m.dom_FR	TA5	M.m.cas_TA	-3.23802	Unrelated
FR8	M.m.dom_FR	TA6	M.m.cas_TA	-3.45184	Unrelated
FR8	M.m.dom_FR	TA7	M.m.cas_TA	-3.5937	Unrelated
FR8	M.m.dom_FR	TA8	M.m.cas_TA	-3.88135	Unrelated
FR8	M.m.dom_FR	SL1	M.spretus	-13.7683	Unrelated
FR8	M.m.dom_FR	SL2	M.spretus	-13.298	Unrelated
FR8	M.m.dom_FR	SL3	M.spretus	-13.626	Unrelated
FR8	M.m.dom_FR	SL4	M.spretus	-13.409	Unrelated
FR8	M.m.dom_FR	SP1	M.spicilegus	-8.24243	Unrelated
FR8	M.m.dom_FR	SP2	M.spicilegus	-9.06816	Unrelated
FR8	M.m.dom_FR	SP3	M.spicilegus	-8.94093	Unrelated
FR8	M.m.dom_FR	SP4	M.spicilegus	-8.80594	Unrelated
IR1	M.m.dom_IR	GE1	M.m.dom_GE	-0.697314	Unrelated
IR1	M.m.dom_IR	GE2	M.m.dom_GE	-0.716928	Unrelated
IR1	M.m.dom_IR	GE3	M.m.dom_GE	-0.67754	Unrelated
IR1	M.m.dom_IR	GE4	M.m.dom_GE	-0.727273	Unrelated
IR1	M.m.dom_IR	GE5	M.m.dom_GE	-0.712452	Unrelated
IR1	M.m.dom_IR	GE6	M.m.dom_GE	-0.703141	Unrelated
IR1	M.m.dom_IR	GE7	M.m.dom_GE	-0.704647	Unrelated
IR1	M.m.dom_IR	GE8	M.m.dom_GE	-0.714732	Unrelated
IR1	M.m.dom_IR	FR1	M.m.dom_FR	-0.660046	Unrelated
IR1	M.m.dom_IR	FR2	M.m.dom_FR	-0.662606	Unrelated
IR1	M.m.dom_IR	FR3	M.m.dom_FR	-0.673058	Unrelated
IR1	M.m.dom_IR	FR4	M.m.dom_FR	-0.675084	Unrelated
IR1	M.m.dom_IR	FR5	M.m.dom_FR	-0.625522	Unrelated
IR1	M.m.dom_IR	FR6	M.m.dom_FR	-0.651596	Unrelated
IR1	M.m.dom_IR	FR7	M.m.dom_FR	-0.668318	Unrelated
IR1	M.m.dom_IR	FR8	M.m.dom_FR	-0.703146	Unrelated
IR1	M.m.dom_IR	IR2	M.m.dom_IR	-0.1261	Unrelated
IR1	M.m.dom_IR	IR3	M.m.dom_IR	-0.191423	Unrelated
IR1	M.m.dom_IR	IR4	M.m.dom_IR	-0.141884	Unrelated
IR1	M.m.dom_IR	IR5	M.m.dom_IR	-0.0527372	Unrelated
IR1	M.m.dom_IR	IR6	M.m.dom_IR	-0.235927	Unrelated
IR1	M.m.dom_IR	IR7	M.m.dom_IR	-0.146979	Unrelated
IR1	M.m.dom_IR	IR8	M.m.dom_IR	-0.201497	Unrelated
IR1	M.m.dom_IR	KA1	M.m.mus_KA	-2.68262	Unrelated
IR1	M.m.dom_IR	KA2	M.m.mus_KA	-2.8618	Unrelated
IR1	M.m.dom_IR	KA3	M.m.mus_KA	-2.69997	Unrelated
IR1	M.m.dom_IR	KA4	M.m.mus_KA	-2.64697	Unrelated
IR1	M.m.dom_IR	KA5	M.m.mus_KA	-2.7472	Unrelated
IR1	M.m.dom_IR	KA6	M.m.mus_KA	-2.77859	Unrelated
IR1	M.m.dom_IR	KA7	M.m.mus_KA	-2.63938	Unrelated
IR1	M.m.dom_IR	KA8	M.m.mus_KA	-2.67516	Unrelated
IR1	M.m.dom_IR	TA1	M.m.cas_TA	-3.09945	Unrelated
IR1	M.m.dom_IR	TA2	M.m.cas_TA	-3.15041	Unrelated
IR1	M.m.dom_IR	TA3	M.m.cas_TA	-3.13718	Unrelated
IR1	M.m.dom_IR	TA4	M.m.cas_TA	-2.95453	Unrelated
IR1	M.m.dom_IR	TA5	M.m.cas_TA	-2.69158	Unrelated
IR1	M.m.dom_IR	TA6	M.m.cas_TA	-2.86325	Unrelated
IR1	M.m.dom_IR	TA7	M.m.cas_TA	-2.96294	Unrelated
IR1	M.m.dom_IR	TA8	M.m.cas_TA	-3.18262	Unrelated
IR1	M.m.dom_IR	SL1	M.spretus	-11.0204	Unrelated
IR1	M.m.dom_IR	SL2	M.spretus	-10.6889	Unrelated
IR1	M.m.dom_IR	SL3	M.spretus	-10.9084	Unrelated
IR1	M.m.dom_IR	SL4	M.spretus	-10.7605	Unrelated
IR1	M.m.dom_IR	SP1	M.spicilegus	-7.14299	Unrelated
IR1	M.m.dom_IR	SP2	M.spicilegus	-7.78248	Unrelated
IR1	M.m.dom_IR	SP3	M.spicilegus	-7.68486	Unrelated
IR1	M.m.dom_IR	SP4	M.spicilegus	-7.59293	Unrelated
IR2	M.m.dom_IR	GE1	M.m.dom_GE	-0.639388	Unrelated
IR2	M.m.dom_IR	GE2	M.m.dom_GE	-0.682845	Unrelated
IR2	M.m.dom_IR	GE3	M.m.dom_GE	-0.63711	Unrelated
IR2	M.m.dom_IR	GE4	M.m.dom_GE	-0.677862	Unrelated
IR2	M.m.dom_IR	GE5	M.m.dom_GE	-0.667002	Unrelated
IR2	M.m.dom_IR	GE6	M.m.dom_GE	-0.64955	Unrelated
IR2	M.m.dom_IR	GE7	M.m.dom_GE	-0.655471	Unrelated
IR2	M.m.dom_IR	GE8	M.m.dom_GE	-0.643624	Unrelated
IR2	M.m.dom_IR	FR1	M.m.dom_FR	-0.601954	Unrelated
IR2	M.m.dom_IR	FR2	M.m.dom_FR	-0.612692	Unrelated
IR2	M.m.dom_IR	FR3	M.m.dom_FR	-0.617886	Unrelated
IR2	M.m.dom_IR	FR4	M.m.dom_FR	-0.614258	Unrelated
IR2	M.m.dom_IR	FR5	M.m.dom_FR	-0.570806	Unrelated
IR2	M.m.dom_IR	FR6	M.m.dom_FR	-0.588746	Unrelated
IR2	M.m.dom_IR	FR7	M.m.dom_FR	-0.60179	Unrelated
IR2	M.m.dom_IR	FR8	M.m.dom_FR	-0.651024	Unrelated
IR2	M.m.dom_IR	IR1	M.m.dom_IR	-0.1261	Unrelated
IR2	M.m.dom_IR	IR3	M.m.dom_IR	-0.134337	Unrelated
IR2	M.m.dom_IR	IR4	M.m.dom_IR	-0.027027	Unrelated
IR2	M.m.dom_IR	IR5	M.m.dom_IR	-0.0891117	Unrelated
IR2	M.m.dom_IR	IR6	M.m.dom_IR	-0.215686	Unrelated
IR2	M.m.dom_IR	IR7	M.m.dom_IR	-0.0632838	Unrelated
IR2	M.m.dom_IR	IR8	M.m.dom_IR	-0.127872	Unrelated
IR2	M.m.dom_IR	KA1	M.m.mus_KA	-2.61766	Unrelated
IR2	M.m.dom_IR	KA2	M.m.mus_KA	-2.78044	Unrelated
IR2	M.m.dom_IR	KA3	M.m.mus_KA	-2.63358	Unrelated
IR2	M.m.dom_IR	KA4	M.m.mus_KA	-2.58488	Unrelated
IR2	M.m.dom_IR	KA5	M.m.mus_KA	-2.6798	Unrelated
IR2	M.m.dom_IR	KA6	M.m.mus_KA	-2.69754	Unrelated
IR2	M.m.dom_IR	KA7	M.m.mus_KA	-2.57488	Unrelated
IR2	M.m.dom_IR	KA8	M.m.mus_KA	-2.60777	Unrelated
IR2	M.m.dom_IR	TA1	M.m.cas_TA	-2.99754	Unrelated
IR2	M.m.dom_IR	TA2	M.m.cas_TA	-3.05306	Unrelated
IR2	M.m.dom_IR	TA3	M.m.cas_TA	-3.03687	Unrelated
IR2	M.m.dom_IR	TA4	M.m.cas_TA	-2.8612	Unrelated
IR2	M.m.dom_IR	TA5	M.m.cas_TA	-2.61592	Unrelated
IR2	M.m.dom_IR	TA6	M.m.cas_TA	-2.7675	Unrelated
IR2	M.m.dom_IR	TA7	M.m.cas_TA	-2.86597	Unrelated
IR2	M.m.dom_IR	TA8	M.m.cas_TA	-3.06787	Unrelated
IR2	M.m.dom_IR	SL1	M.spretus	-10.4767	Unrelated
IR2	M.m.dom_IR	SL2	M.spretus	-10.1649	Unrelated
IR2	M.m.dom_IR	SL3	M.spretus	-10.363	Unrelated
IR2	M.m.dom_IR	SL4	M.spretus	-10.2342	Unrelated
IR2	M.m.dom_IR	SP1	M.spicilegus	-6.92264	Unrelated
IR2	M.m.dom_IR	SP2	M.spicilegus	-7.51967	Unrelated
IR2	M.m.dom_IR	SP3	M.spicilegus	-7.42771	Unrelated
IR2	M.m.dom_IR	SP4	M.spicilegus	-7.34589	Unrelated
IR3	M.m.dom_IR	GE1	M.m.dom_GE	-0.744847	Unrelated
IR3	M.m.dom_IR	GE2	M.m.dom_GE	-0.785586	Unrelated
IR3	M.m.dom_IR	GE3	M.m.dom_GE	-0.743077	Unrelated
IR3	M.m.dom_IR	GE4	M.m.dom_GE	-0.791269	Unrelated
IR3	M.m.dom_IR	GE5	M.m.dom_GE	-0.769782	Unrelated
IR3	M.m.dom_IR	GE6	M.m.dom_GE	-0.752405	Unrelated
IR3	M.m.dom_IR	GE7	M.m.dom_GE	-0.761279	Unrelated
IR3	M.m.dom_IR	GE8	M.m.dom_GE	-0.752152	Unrelated
IR3	M.m.dom_IR	FR1	M.m.dom_FR	-0.707481	Unrelated
IR3	M.m.dom_IR	FR2	M.m.dom_FR	-0.706108	Unrelated
IR3	M.m.dom_IR	FR3	M.m.dom_FR	-0.710371	Unrelated
IR3	M.m.dom_IR	FR4	M.m.dom_FR	-0.715278	Unrelated
IR3	M.m.dom_IR	FR5	M.m.dom_FR	-0.667991	Unrelated
IR3	M.m.dom_IR	FR6	M.m.dom_FR	-0.681631	Unrelated
IR3	M.m.dom_IR	FR7	M.m.dom_FR	-0.700034	Unrelated
IR3	M.m.dom_IR	FR8	M.m.dom_FR	-0.742766	Unrelated
IR3	M.m.dom_IR	IR1	M.m.dom_IR	-0.191423	Unrelated
IR3	M.m.dom_IR	IR2	M.m.dom_IR	-0.134337	Unrelated
IR3	M.m.dom_IR	IR4	M.m.dom_IR	-0.17255	Unrelated
IR3	M.m.dom_IR	IR5	M.m.dom_IR	-0.162107	Unrelated
IR3	M.m.dom_IR	IR6	M.m.dom_IR	-0.354818	Unrelated
IR3	M.m.dom_IR	IR7	M.m.dom_IR	-0.148903	Unrelated
IR3	M.m.dom_IR	IR8	M.m.dom_IR	-0.24647	Unrelated
IR3	M.m.dom_IR	KA1	M.m.mus_KA	-2.78702	Unrelated
IR3	M.m.dom_IR	KA2	M.m.mus_KA	-2.96877	Unrelated
IR3	M.m.dom_IR	KA3	M.m.mus_KA	-2.80974	Unrelated
IR3	M.m.dom_IR	KA4	M.m.mus_KA	-2.75939	Unrelated
IR3	M.m.dom_IR	KA5	M.m.mus_KA	-2.87133	Unrelated
IR3	M.m.dom_IR	KA6	M.m.mus_KA	-2.88784	Unrelated
IR3	M.m.dom_IR	KA7	M.m.mus_KA	-2.75316	Unrelated
IR3	M.m.dom_IR	KA8	M.m.mus_KA	-2.77444	Unrelated
IR3	M.m.dom_IR	TA1	M.m.cas_TA	-3.23503	Unrelated
IR3	M.m.dom_IR	TA2	M.m.cas_TA	-3.29702	Unrelated
IR3	M.m.dom_IR	TA3	M.m.cas_TA	-3.27083	Unrelated
IR3	M.m.dom_IR	TA4	M.m.cas_TA	-3.07728	Unrelated
IR3	M.m.dom_IR	TA5	M.m.cas_TA	-2.80047	Unrelated
IR3	M.m.dom_IR	TA6	M.m.cas_TA	-2.97256	Unrelated
IR3	M.m.dom_IR	TA7	M.m.cas_TA	-3.08989	Unrelated
IR3	M.m.dom_IR	TA8	M.m.cas_TA	-3.30793	Unrelated
IR3	M.m.dom_IR	SL1	M.spretus	-11.5428	Unrelated
IR3	M.m.dom_IR	SL2	M.spretus	-11.1797	Unrelated
IR3	M.m.dom_IR	SL3	M.spretus	-11.4151	Unrelated
IR3	M.m.dom_IR	SL4	M.spretus	-11.2668	Unrelated
IR3	M.m.dom_IR	SP1	M.spicilegus	-7.35721	Unrelated
IR3	M.m.dom_IR	SP2	M.spicilegus	-8.02453	Unrelated
IR3	M.m.dom_IR	SP3	M.spicilegus	-7.92186	Unrelated
IR3	M.m.dom_IR	SP4	M.spicilegus	-7.82384	Unrelated
IR4	M.m.dom_IR	GE1	M.m.dom_GE	-0.646366	Unrelated
IR4	M.m.dom_IR	GE2	M.m.dom_GE	-0.680873	Unrelated
IR4	M.m.dom_IR	GE3	M.m.dom_GE	-0.659582	Unrelated
IR4	M.m.dom_IR	GE4	M.m.dom_GE	-0.671983	Unrelated
IR4	M.m.dom_IR	GE5	M.m.dom_GE	-0.66181	Unrelated
IR4	M.m.dom_IR	GE6	M.m.dom_GE	-0.66172	Unrelated
IR4	M.m.dom_IR	GE7	M.m.dom_GE	-0.663303	Unrelated
IR4	M.m.dom_IR	GE8	M.m.dom_GE	-0.660896	Unrelated
IR4	M.m.dom_IR	FR1	M.m.dom_FR	-0.612934	Unrelated
IR4	M.m.dom_IR	FR2	M.m.dom_FR	-0.612967	Unrelated
IR4	M.m.dom_IR	FR3	M.m.dom_FR	-0.622493	Unrelated
IR4	M.m.dom_IR	FR4	M.m.dom_FR	-0.615537	Unrelated
IR4	M.m.dom_IR	FR5	M.m.dom_FR	-0.57408	Unrelated
IR4	M.m.dom_IR	FR6	M.m.dom_FR	-0.597854	Unrelated
IR4	M.m.dom_IR	FR7	M.m.dom_FR	-0.608078	Unrelated
IR4	M.m.dom_IR	FR8	M.m.dom_FR	-0.654078	Unrelated
IR4	M.m.dom_IR	IR1	M.m.dom_IR	-0.141884	Unrelated
IR4	M.m.dom_IR	IR2	M.m.dom_IR	-0.027027	Unrelated
IR4	M.m.dom_IR	IR3	M.m.dom_IR	-0.17255	Unrelated
IR4	M.m.dom_IR	IR5	M.m.dom_IR	-0.111049	Unrelated
IR4	M.m.dom_IR	IR6	M.m.dom_IR	-0.202167	Unrelated
IR4	M.m.dom_IR	IR7	M.m.dom_IR	-0.136966	Unrelated
IR4	M.m.dom_IR	IR8	M.m.dom_IR	-0.156384	Unrelated
IR4	M.m.dom_IR	KA1	M.m.mus_KA	-2.60609	Unrelated
IR4	M.m.dom_IR	KA2	M.m.mus_KA	-2.77455	Unrelated
IR4	M.m.dom_IR	KA3	M.m.mus_KA	-2.62224	Unrelated
IR4	M.m.dom_IR	KA4	M.m.mus_KA	-2.57727	Unrelated
IR4	M.m.dom_IR	KA5	M.m.mus_KA	-2.67764	Unrelated
IR4	M.m.dom_IR	KA6	M.m.mus_KA	-2.69838	Unrelated
IR4	M.m.dom_IR	KA7	M.m.mus_KA	-2.57143	Unrelated
IR4	M.m.dom_IR	KA8	M.m.mus_KA	-2.59824	Unrelated
IR4	M.m.dom_IR	TA1	M.m.cas_TA	-3.00142	Unrelated
IR4	M.m.dom_IR	TA2	M.m.cas_TA	-3.06128	Unrelated
IR4	M.m.dom_IR	TA3	M.m.cas_TA	-3.04198	Unrelated
IR4	M.m.dom_IR	TA4	M.m.cas_TA	-2.86915	Unrelated
IR4	M.m.dom_IR	TA5	M.m.cas_TA	-2.61335	Unrelated
IR4	M.m.dom_IR	TA6	M.m.cas_TA	-2.77346	Unrelated
IR4	M.m.dom_IR	TA7	M.m.cas_TA	-2.87022	Unrelated
IR4	M.m.dom_IR	TA8	M.m.cas_TA	-3.08014	Unrelated
IR4	M.m.dom_IR	SL1	M.spretus	-10.6565	Unrelated
IR4	M.m.dom_IR	SL2	M.spretus	-10.3341	Unrelated
IR4	M.m.dom_IR	SL3	M.spretus	-10.542	Unrelated
IR4	M.m.dom_IR	SL4	M.spretus	-10.4049	Unrelated
IR4	M.m.dom_IR	SP1	M.spicilegus	-6.98918	Unrelated
IR4	M.m.dom_IR	SP2	M.spicilegus	-7.59974	Unrelated
IR4	M.m.dom_IR	SP3	M.spicilegus	-7.50911	Unrelated
IR4	M.m.dom_IR	SP4	M.spicilegus	-7.41819	Unrelated
IR5	M.m.dom_IR	GE1	M.m.dom_GE	-0.594489	Unrelated
IR5	M.m.dom_IR	GE2	M.m.dom_GE	-0.61392	Unrelated
IR5	M.m.dom_IR	GE3	M.m.dom_GE	-0.585147	Unrelated
IR5	M.m.dom_IR	GE4	M.m.dom_GE	-0.632966	Unrelated
IR5	M.m.dom_IR	GE5	M.m.dom_GE	-0.613903	Unrelated
IR5	M.m.dom_IR	GE6	M.m.dom_GE	-0.594217	Unrelated
IR5	M.m.dom_IR	GE7	M.m.dom_GE	-0.595269	Unrelated
IR5	M.m.dom_IR	GE8	M.m.dom_GE	-0.598562	Unrelated
IR5	M.m.dom_IR	FR1	M.m.dom_FR	-0.571341	Unrelated
IR5	M.m.dom_IR	FR2	M.m.dom_FR	-0.571429	Unrelated
IR5	M.m.dom_IR	FR3	M.m.dom_FR	-0.580533	Unrelated
IR5	M.m.dom_IR	FR4	M.m.dom_FR	-0.578864	Unrelated
IR5	M.m.dom_IR	FR5	M.m.dom_FR	-0.532503	Unrelated
IR5	M.m.dom_IR	FR6	M.m.dom_FR	-0.558482	Unrelated
IR5	M.m.dom_IR	FR7	M.m.dom_FR	-0.572631	Unrelated
IR5	M.m.dom_IR	FR8	M.m.dom_FR	-0.603221	Unrelated
IR5	M.m.dom_IR	IR1	M.m.dom_IR	-0.0527372	Unrelated
IR5	M.m.dom_IR	IR2	M.m.dom_IR	-0.0891117	Unrelated
IR5	M.m.dom_IR	IR3	M.m.dom_IR	-0.162107	Unrelated
IR5	M.m.dom_IR	IR4	M.m.dom_IR	-0.111049	Unrelated
IR5	M.m.dom_IR	IR6	M.m.dom_IR	-0.0711935	Unrelated
IR5	M.m.dom_IR	IR7	M.m.dom_IR	-0.0413341	Unrelated
IR5	M.m.dom_IR	IR8	M.m.dom_IR	-0.102451	Unrelated
IR5	M.m.dom_IR	KA1	M.m.mus_KA	-2.50559	Unrelated
IR5	M.m.dom_IR	KA2	M.m.mus_KA	-2.6642	Unrelated
IR5	M.m.dom_IR	KA3	M.m.mus_KA	-2.5249	Unrelated
IR5	M.m.dom_IR	KA4	M.m.mus_KA	-2.48257	Unrelated
IR5	M.m.dom_IR	KA5	M.m.mus_KA	-2.56814	Unrelated
IR5	M.m.dom_IR	KA6	M.m.mus_KA	-2.59177	Unrelated
IR5	M.m.dom_IR	KA7	M.m.mus_KA	-2.47042	Unrelated
IR5	M.m.dom_IR	KA8	M.m.mus_KA	-2.49956	Unrelated
IR5	M.m.dom_IR	TA1	M.m.cas_TA	-2.84416	Unrelated
IR5	M.m.dom_IR	TA2	M.m.cas_TA	-2.8902	Unrelated
IR5	M.m.dom_IR	TA3	M.m.cas_TA	-2.88966	Unrelated
IR5	M.m.dom_IR	TA4	M.m.cas_TA	-2.71645	Unrelated
IR5	M.m.dom_IR	TA5	M.m.cas_TA	-2.48895	Unrelated
IR5	M.m.dom_IR	TA6	M.m.cas_TA	-2.63905	Unrelated
IR5	M.m.dom_IR	TA7	M.m.cas_TA	-2.73232	Unrelated
IR5	M.m.dom_IR	TA8	M.m.cas_TA	-2.91919	Unrelated
IR5	M.m.dom_IR	SL1	M.spretus	-10.0441	Unrelated
IR5	M.m.dom_IR	SL2	M.spretus	-9.74737	Unrelated
IR5	M.m.dom_IR	SL3	M.spretus	-9.94296	Unrelated
IR5	M.m.dom_IR	SL4	M.spretus	-9.81886	Unrelated
IR5	M.m.dom_IR	SP1	M.spicilegus	-6.72907	Unrelated
IR5	M.m.dom_IR	SP2	M.spicilegus	-7.2957	Unrelated
IR5	M.m.dom_IR	SP3	M.spicilegus	-7.20895	Unrelated
IR5	M.m.dom_IR	SP4	M.spicilegus	-7.12914	Unrelated
IR6	M.m.dom_IR	GE1	M.m.dom_GE	-0.770123	Unrelated
IR6	M.m.dom_IR	GE2	M.m.dom_GE	-0.824936	Unrelated
IR6	M.m.dom_IR	GE3	M.m.dom_GE	-0.780122	Unrelated
IR6	M.m.dom_IR	GE4	M.m.dom_GE	-0.838951	Unrelated
IR6	M.m.dom_IR	GE5	M.m.dom_GE	-0.804896	Unrelated
IR6	M.m.dom_IR	GE6	M.m.dom_GE	-0.812068	Unrelated
IR6	M.m.dom_IR	GE7	M.m.dom_GE	-0.803914	Unrelated
IR6	M.m.dom_IR	GE8	M.m.dom_GE	-0.801611	Unrelated
IR6	M.m.dom_IR	FR1	M.m.dom_FR	-0.751111	Unrelated
IR6	M.m.dom_IR	FR2	M.m.dom_FR	-0.747597	Unrelated
IR6	M.m.dom_IR	FR3	M.m.dom_FR	-0.737531	Unrelated
IR6	M.m.dom_IR	FR4	M.m.dom_FR	-0.733357	Unrelated
IR6	M.m.dom_IR	FR5	M.m.dom_FR	-0.692749	Unrelated
IR6	M.m.dom_IR	FR6	M.m.dom_FR	-0.721523	Unrelated
IR6	M.m.dom_IR	FR7	M.m.dom_FR	-0.753905	Unrelated
IR6	M.m.dom_IR	FR8	M.m.dom_FR	-0.789777	Unrelated
IR6	M.m.dom_IR	IR1	M.m.dom_IR	-0.235927	Unrelated
IR6	M.m.dom_IR	IR2	M.m.dom_IR	-0.215686	Unrelated
IR6	M.m.dom_IR	IR3	M.m.dom_IR	-0.354818	Unrelated
IR6	M.m.dom_IR	IR4	M.m.dom_IR	-0.202167	Unrelated
IR6	M.m.dom_IR	IR5	M.m.dom_IR	-0.0711935	Unrelated
IR6	M.m.dom_IR	IR7	M.m.dom_IR	-0.184533	Unrelated
IR6	M.m.dom_IR	IR8	M.m.dom_IR	-0.292484	Unrelated
IR6	M.m.dom_IR	KA1	M.m.mus_KA	-2.87366	Unrelated
IR6	M.m.dom_IR	KA2	M.m.mus_KA	-3.06468	Unrelated
IR6	M.m.dom_IR	KA3	M.m.mus_KA	-2.89925	Unrelated
IR6	M.m.dom_IR	KA4	M.m.mus_KA	-2.85191	Unrelated
IR6	M.m.dom_IR	KA5	M.m.mus_KA	-2.96941	Unrelated
IR6	M.m.dom_IR	KA6	M.m.mus_KA	-2.96736	Unrelated
IR6	M.m.dom_IR	KA7	M.m.mus_KA	-2.8386	Unrelated
IR6	M.m.dom_IR	KA8	M.m.mus_KA	-2.87118	Unrelated
IR6	M.m.dom_IR	TA1	M.m.cas_TA	-3.32897	Unrelated
IR6	M.m.dom_IR	TA2	M.m.cas_TA	-3.38945	Unrelated
IR6	M.m.dom_IR	TA3	M.m.cas_TA	-3.38399	Unrelated
IR6	M.m.dom_IR	TA4	M.m.cas_TA	-3.16661	Unrelated
IR6	M.m.dom_IR	TA5	M.m.cas_TA	-2.88025	Unrelated
IR6	M.m.dom_IR	TA6	M.m.cas_TA	-3.05739	Unrelated
IR6	M.m.dom_IR	TA7	M.m.cas_TA	-3.17833	Unrelated
IR6	M.m.dom_IR	TA8	M.m.cas_TA	-3.42154	Unrelated
IR6	M.m.dom_IR	SL1	M.spretus	-11.9531	Unrelated
IR6	M.m.dom_IR	SL2	M.spretus	-11.5842	Unrelated
IR6	M.m.dom_IR	SL3	M.spretus	-11.8346	Unrelated
IR6	M.m.dom_IR	SL4	M.spretus	-11.6684	Unrelated
IR6	M.m.dom_IR	SP1	M.spicilegus	-7.55252	Unrelated
IR6	M.m.dom_IR	SP2	M.spicilegus	-8.25738	Unrelated
IR6	M.m.dom_IR	SP3	M.spicilegus	-8.14041	Unrelated
IR6	M.m.dom_IR	SP4	M.spicilegus	-8.03745	Unrelated
IR7	M.m.dom_IR	GE1	M.m.dom_GE	-0.654807	Unrelated
IR7	M.m.dom_IR	GE2	M.m.dom_GE	-0.699029	Unrelated
IR7	M.m.dom_IR	GE3	M.m.dom_GE	-0.647873	Unrelated
IR7	M.m.dom_IR	GE4	M.m.dom_GE	-0.698413	Unrelated
IR7	M.m.dom_IR	GE5	M.m.dom_GE	-0.68091	Unrelated
IR7	M.m.dom_IR	GE6	M.m.dom_GE	-0.654321	Unrelated
IR7	M.m.dom_IR	GE7	M.m.dom_GE	-0.668605	Unrelated
IR7	M.m.dom_IR	GE8	M.m.dom_GE	-0.667587	Unrelated
IR7	M.m.dom_IR	FR1	M.m.dom_FR	-0.61521	Unrelated
IR7	M.m.dom_IR	FR2	M.m.dom_FR	-0.626093	Unrelated
IR7	M.m.dom_IR	FR3	M.m.dom_FR	-0.618984	Unrelated
IR7	M.m.dom_IR	FR4	M.m.dom_FR	-0.633322	Unrelated
IR7	M.m.dom_IR	FR5	M.m.dom_FR	-0.583067	Unrelated
IR7	M.m.dom_IR	FR6	M.m.dom_FR	-0.602246	Unrelated
IR7	M.m.dom_IR	FR7	M.m.dom_FR	-0.626067	Unrelated
IR7	M.m.dom_IR	FR8	M.m.dom_FR	-0.660211	Unrelated
IR7	M.m.dom_IR	IR1	M.m.dom_IR	-0.146979	Unrelated
IR7	M.m.dom_IR	IR2	M.m.dom_IR	-0.0632838	Unrelated
IR7	M.m.dom_IR	IR3	M.m.dom_IR	-0.148903	Unrelated
IR7	M.m.dom_IR	IR4	M.m.dom_IR	-0.136966	Unrelated
IR7	M.m.dom_IR	IR5	M.m.dom_IR	-0.0413341	Unrelated
IR7	M.m.dom_IR	IR6	M.m.dom_IR	-0.184533	Unrelated
IR7	M.m.dom_IR	IR8	M.m.dom_IR	-0.105736	Unrelated
IR7	M.m.dom_IR	KA1	M.m.mus_KA	-2.65235	Unrelated
IR7	M.m.dom_IR	KA2	M.m.mus_KA	-2.82281	Unrelated
IR7	M.m.dom_IR	KA3	M.m.mus_KA	-2.66943	Unrelated
IR7	M.m.dom_IR	KA4	M.m.mus_KA	-2.61858	Unrelated
IR7	M.m.dom_IR	KA5	M.m.mus_KA	-2.72357	Unrelated
IR7	M.m.dom_IR	KA6	M.m.mus_KA	-2.74361	Unrelated
IR7	M.m.dom_IR	KA7	M.m.mus_KA	-2.60753	Unrelated
IR7	M.m.dom_IR	KA8	M.m.mus_KA	-2.63939	Unrelated
IR7	M.m.dom_IR	TA1	M.m.cas_TA	-3.06621	Unrelated
IR7	M.m.dom_IR	TA2	M.m.cas_TA	-3.12624	Unrelated
IR7	M.m.dom_IR	TA3	M.m.cas_TA	-3.11322	Unrelated
IR7	M.m.dom_IR	TA4	M.m.cas_TA	-2.92564	Unrelated
IR7	M.m.dom_IR	TA5	M.m.cas_TA	-2.67539	Unrelated
IR7	M.m.dom_IR	TA6	M.m.cas_TA	-2.83835	Unrelated
IR7	M.m.dom_IR	TA7	M.m.cas_TA	-2.94199	Unrelated
IR7	M.m.dom_IR	TA8	M.m.cas_TA	-3.14785	Unrelated
IR7	M.m.dom_IR	SL1	M.spretus	-10.867	Unrelated
IR7	M.m.dom_IR	SL2	M.spretus	-10.5378	Unrelated
IR7	M.m.dom_IR	SL3	M.spretus	-10.756	Unrelated
IR7	M.m.dom_IR	SL4	M.spretus	-10.6146	Unrelated
IR7	M.m.dom_IR	SP1	M.spicilegus	-7.07749	Unrelated
IR7	M.m.dom_IR	SP2	M.spicilegus	-7.70434	Unrelated
IR7	M.m.dom_IR	SP3	M.spicilegus	-7.60721	Unrelated
IR7	M.m.dom_IR	SP4	M.spicilegus	-7.52061	Unrelated
IR8	M.m.dom_IR	GE1	M.m.dom_GE	-0.76374	Unrelated
IR8	M.m.dom_IR	GE2	M.m.dom_GE	-0.808903	Unrelated
IR8	M.m.dom_IR	GE3	M.m.dom_GE	-0.765927	Unrelated
IR8	M.m.dom_IR	GE4	M.m.dom_GE	-0.816875	Unrelated
IR8	M.m.dom_IR	GE5	M.m.dom_GE	-0.790363	Unrelated
IR8	M.m.dom_IR	GE6	M.m.dom_GE	-0.772093	Unrelated
IR8	M.m.dom_IR	GE7	M.m.dom_GE	-0.774884	Unrelated
IR8	M.m.dom_IR	GE8	M.m.dom_GE	-0.775216	Unrelated
IR8	M.m.dom_IR	FR1	M.m.dom_FR	-0.73358	Unrelated
IR8	M.m.dom_IR	FR2	M.m.dom_FR	-0.728356	Unrelated
IR8	M.m.dom_IR	FR3	M.m.dom_FR	-0.741205	Unrelated
IR8	M.m.dom_IR	FR4	M.m.dom_FR	-0.733961	Unrelated
IR8	M.m.dom_IR	FR5	M.m.dom_FR	-0.683283	Unrelated
IR8	M.m.dom_IR	FR6	M.m.dom_FR	-0.718513	Unrelated
IR8	M.m.dom_IR	FR7	M.m.dom_FR	-0.735726	Unrelated
IR8	M.m.dom_IR	FR8	M.m.dom_FR	-0.779943	Unrelated
IR8	M.m.dom_IR	IR1	M.m.dom_IR	-0.201497	Unrelated
IR8	M.m.dom_IR	IR2	M.m.dom_IR	-0.127872	Unrelated
IR8	M.m.dom_IR	IR3	M.m.dom_IR	-0.24647	Unrelated
IR8	M.m.dom_IR	IR4	M.m.dom_IR	-0.156384	Unrelated
IR8	M.m.dom_IR	IR5	M.m.dom_IR	-0.102451	Unrelated
IR8	M.m.dom_IR	IR6	M.m.dom_IR	-0.292484	Unrelated
IR8	M.m.dom_IR	IR7	M.m.dom_IR	-0.105736	Unrelated
IR8	M.m.dom_IR	KA1	M.m.mus_KA	-2.80835	Unrelated
IR8	M.m.dom_IR	KA2	M.m.mus_KA	-3.00135	Unrelated
IR8	M.m.dom_IR	KA3	M.m.mus_KA	-2.83424	Unrelated
IR8	M.m.dom_IR	KA4	M.m.mus_KA	-2.78562	Unrelated
IR8	M.m.dom_IR	KA5	M.m.mus_KA	-2.89367	Unrelated
IR8	M.m.dom_IR	KA6	M.m.mus_KA	-2.91103	Unrelated
IR8	M.m.dom_IR	KA7	M.m.mus_KA	-2.76842	Unrelated
IR8	M.m.dom_IR	KA8	M.m.mus_KA	-2.80083	Unrelated
IR8	M.m.dom_IR	TA1	M.m.cas_TA	-3.27469	Unrelated
IR8	M.m.dom_IR	TA2	M.m.cas_TA	-3.33986	Unrelated
IR8	M.m.dom_IR	TA3	M.m.cas_TA	-3.32747	Unrelated
IR8	M.m.dom_IR	TA4	M.m.cas_TA	-3.11788	Unrelated
IR8	M.m.dom_IR	TA5	M.m.cas_TA	-2.83798	Unrelated
IR8	M.m.dom_IR	TA6	M.m.cas_TA	-3.02232	Unrelated
IR8	M.m.dom_IR	TA7	M.m.cas_TA	-3.13923	Unrelated
IR8	M.m.dom_IR	TA8	M.m.cas_TA	-3.35771	Unrelated
IR8	M.m.dom_IR	SL1	M.spretus	-11.6344	Unrelated
IR8	M.m.dom_IR	SL2	M.spretus	-11.2714	Unrelated
IR8	M.m.dom_IR	SL3	M.spretus	-11.5074	Unrelated
IR8	M.m.dom_IR	SL4	M.spretus	-11.3535	Unrelated
IR8	M.m.dom_IR	SP1	M.spicilegus	-7.42604	Unrelated
IR8	M.m.dom_IR	SP2	M.spicilegus	-8.10092	Unrelated
IR8	M.m.dom_IR	SP3	M.spicilegus	-7.99662	Unrelated
IR8	M.m.dom_IR	SP4	M.spicilegus	-7.90293	Unrelated
KA1	M.m.mus_KA	GE1	M.m.dom_GE	-3.15855	Unrelated
KA1	M.m.mus_KA	GE2	M.m.dom_GE	-3.26027	Unrelated
KA1	M.m.mus_KA	GE3	M.m.dom_GE	-3.13394	Unrelated
KA1	M.m.mus_KA	GE4	M.m.dom_GE	-3.30459	Unrelated
KA1	M.m.mus_KA	GE5	M.m.dom_GE	-3.20487	Unrelated
KA1	M.m.mus_KA	GE6	M.m.dom_GE	-3.20029	Unrelated
KA1	M.m.mus_KA	GE7	M.m.dom_GE	-3.18159	Unrelated
KA1	M.m.mus_KA	GE8	M.m.dom_GE	-3.20057	Unrelated
KA1	M.m.mus_KA	FR1	M.m.dom_FR	-2.9453	Unrelated
KA1	M.m.mus_KA	FR2	M.m.dom_FR	-3.12046	Unrelated
KA1	M.m.mus_KA	FR3	M.m.dom_FR	-3.0975	Unrelated
KA1	M.m.mus_KA	FR4	M.m.dom_FR	-3.09344	Unrelated
KA1	M.m.mus_KA	FR5	M.m.dom_FR	-2.89073	Unrelated
KA1	M.m.mus_KA	FR6	M.m.dom_FR	-3.02091	Unrelated
KA1	M.m.mus_KA	FR7	M.m.dom_FR	-3.03781	Unrelated
KA1	M.m.mus_KA	FR8	M.m.dom_FR	-3.18779	Unrelated
KA1	M.m.mus_KA	IR1	M.m.dom_IR	-2.68262	Unrelated
KA1	M.m.mus_KA	IR2	M.m.dom_IR	-2.61766	Unrelated
KA1	M.m.mus_KA	IR3	M.m.dom_IR	-2.78702	Unrelated
KA1	M.m.mus_KA	IR4	M.m.dom_IR	-2.60609	Unrelated
KA1	M.m.mus_KA	IR5	M.m.dom_IR	-2.50559	Unrelated
KA1	M.m.mus_KA	IR6	M.m.dom_IR	-2.87366	Unrelated
KA1	M.m.mus_KA	IR7	M.m.dom_IR	-2.65235	Unrelated
KA1	M.m.mus_KA	IR8	M.m.dom_IR	-2.80835	Unrelated
KA1	M.m.mus_KA	KA2	M.m.mus_KA	-0.174337	Unrelated
KA1	M.m.mus_KA	KA3	M.m.mus_KA	-0.1655	Unrelated
KA1	M.m.mus_KA	KA4	M.m.mus_KA	-0.18943	Unrelated
KA1	M.m.mus_KA	KA5	M.m.mus_KA	-0.215512	Unrelated
KA1	M.m.mus_KA	KA6	M.m.mus_KA	-0.201832	Unrelated
KA1	M.m.mus_KA	KA7	M.m.mus_KA	-0.213992	Unrelated
KA1	M.m.mus_KA	KA8	M.m.mus_KA	-0.14829	Unrelated
KA1	M.m.mus_KA	TA1	M.m.cas_TA	-3.1786	Unrelated
KA1	M.m.mus_KA	TA2	M.m.cas_TA	-3.25545	Unrelated
KA1	M.m.mus_KA	TA3	M.m.cas_TA	-3.22717	Unrelated
KA1	M.m.mus_KA	TA4	M.m.cas_TA	-3.02384	Unrelated
KA1	M.m.mus_KA	TA5	M.m.cas_TA	-2.74414	Unrelated
KA1	M.m.mus_KA	TA6	M.m.cas_TA	-2.91591	Unrelated
KA1	M.m.mus_KA	TA7	M.m.cas_TA	-3.01445	Unrelated
KA1	M.m.mus_KA	TA8	M.m.cas_TA	-3.2629	Unrelated
KA1	M.m.mus_KA	SL1	M.spretus	-12.1379	Unrelated
KA1	M.m.mus_KA	SL2	M.spretus	-11.7714	Unrelated
KA1	M.m.mus_KA	SL3	M.spretus	-12.0137	Unrelated
KA1	M.m.mus_KA	SL4	M.spretus	-11.8448	Unrelated
KA1	M.m.mus_KA	SP1	M.spicilegus	-7.75442	Unrelated
KA1	M.m.mus_KA	SP2	M.spicilegus	-8.46762	Unrelated
KA1	M.m.mus_KA	SP3	M.spicilegus	-8.35142	Unrelated
KA1	M.m.mus_KA	SP4	M.spicilegus	-8.24578	Unrelated
KA2	M.m.mus_KA	GE1	M.m.dom_GE	-3.38701	Unrelated
KA2	M.m.mus_KA	GE2	M.m.dom_GE	-3.50171	Unrelated
KA2	M.m.mus_KA	GE3	M.m.dom_GE	-3.35775	Unrelated
KA2	M.m.mus_KA	GE4	M.m.dom_GE	-3.55163	Unrelated
KA2	M.m.mus_KA	GE5	M.m.dom_GE	-3.44646	Unrelated
KA2	M.m.mus_KA	GE6	M.m.dom_GE	-3.43734	Unrelated
KA2	M.m.mus_KA	GE7	M.m.dom_GE	-3.41839	Unrelated
KA2	M.m.mus_KA	GE8	M.m.dom_GE	-3.44049	Unrelated
KA2	M.m.mus_KA	FR1	M.m.dom_FR	-3.15154	Unrelated
KA2	M.m.mus_KA	FR2	M.m.dom_FR	-3.35101	Unrelated
KA2	M.m.mus_KA	FR3	M.m.dom_FR	-3.31723	Unrelated
KA2	M.m.mus_KA	FR4	M.m.dom_FR	-3.32125	Unrelated
KA2	M.m.mus_KA	FR5	M.m.dom_FR	-3.09474	Unrelated
KA2	M.m.mus_KA	FR6	M.m.dom_FR	-3.24169	Unrelated
KA2	M.m.mus_KA	FR7	M.m.dom_FR	-3.2465	Unrelated
KA2	M.m.mus_KA	FR8	M.m.dom_FR	-3.42176	Unrelated
KA2	M.m.mus_KA	IR1	M.m.dom_IR	-2.8618	Unrelated
KA2	M.m.mus_KA	IR2	M.m.dom_IR	-2.78044	Unrelated
KA2	M.m.mus_KA	IR3	M.m.dom_IR	-2.96877	Unrelated
KA2	M.m.mus_KA	IR4	M.m.dom_IR	-2.77455	Unrelated
KA2	M.m.mus_KA	IR5	M.m.dom_IR	-2.6642	Unrelated
KA2	M.m.mus_KA	IR6	M.m.dom_IR	-3.06468	Unrelated
KA2	M.m.mus_KA	IR7	M.m.dom_IR	-2.82281	Unrelated
KA2	M.m.mus_KA	IR8	M.m.dom_IR	-3.00135	Unrelated
KA2	M.m.mus_KA	KA1	M.m.mus_KA	-0.174337	Unrelated
KA2	M.m.mus_KA	KA3	M.m.mus_KA	-0.240227	Unrelated
KA2	M.m.mus_KA	KA4	M.m.mus_KA	-0.225936	Unrelated
KA2	M.m.mus_KA	KA5	M.m.mus_KA	-0.263797	Unrelated
KA2	M.m.mus_KA	KA6	M.m.mus_KA	-0.246561	Unrelated
KA2	M.m.mus_KA	KA7	M.m.mus_KA	-0.213621	Unrelated
KA2	M.m.mus_KA	KA8	M.m.mus_KA	-0.253691	Unrelated
KA2	M.m.mus_KA	TA1	M.m.cas_TA	-3.41078	Unrelated
KA2	M.m.mus_KA	TA2	M.m.cas_TA	-3.49716	Unrelated
KA2	M.m.mus_KA	TA3	M.m.cas_TA	-3.45785	Unrelated
KA2	M.m.mus_KA	TA4	M.m.cas_TA	-3.23291	Unrelated
KA2	M.m.mus_KA	TA5	M.m.cas_TA	-2.92492	Unrelated
KA2	M.m.mus_KA	TA6	M.m.cas_TA	-3.1059	Unrelated
KA2	M.m.mus_KA	TA7	M.m.cas_TA	-3.22786	Unrelated
KA2	M.m.mus_KA	TA8	M.m.cas_TA	-3.49256	Unrelated
KA2	M.m.mus_KA	SL1	M.spretus	-13.1711	Unrelated
KA2	M.m.mus_KA	SL2	M.spretus	-12.7639	Unrelated
KA2	M.m.mus_KA	SL3	M.spretus	-13.0521	Unrelated
KA2	M.m.mus_KA	SL4	M.spretus	-12.8626	Unrelated
KA2	M.m.mus_KA	SP1	M.spicilegus	-8.16727	Unrelated
KA2	M.m.mus_KA	SP2	M.spicilegus	-8.94291	Unrelated
KA2	M.m.mus_KA	SP3	M.spicilegus	-8.81554	Unrelated
KA2	M.m.mus_KA	SP4	M.spicilegus	-8.69965	Unrelated
KA3	M.m.mus_KA	GE1	M.m.dom_GE	-3.18169	Unrelated
KA3	M.m.mus_KA	GE2	M.m.dom_GE	-3.27419	Unrelated
KA3	M.m.mus_KA	GE3	M.m.dom_GE	-3.14052	Unrelated
KA3	M.m.mus_KA	GE4	M.m.dom_GE	-3.31923	Unrelated
KA3	M.m.mus_KA	GE5	M.m.dom_GE	-3.21688	Unrelated
KA3	M.m.mus_KA	GE6	M.m.dom_GE	-3.21297	Unrelated
KA3	M.m.mus_KA	GE7	M.m.dom_GE	-3.19682	Unrelated
KA3	M.m.mus_KA	GE8	M.m.dom_GE	-3.21655	Unrelated
KA3	M.m.mus_KA	FR1	M.m.dom_FR	-2.92657	Unrelated
KA3	M.m.mus_KA	FR2	M.m.dom_FR	-3.13646	Unrelated
KA3	M.m.mus_KA	FR3	M.m.dom_FR	-3.11801	Unrelated
KA3	M.m.mus_KA	FR4	M.m.dom_FR	-3.11952	Unrelated
KA3	M.m.mus_KA	FR5	M.m.dom_FR	-2.88208	Unrelated
KA3	M.m.mus_KA	FR6	M.m.dom_FR	-3.03103	Unrelated
KA3	M.m.mus_KA	FR7	M.m.dom_FR	-3.01762	Unrelated
KA3	M.m.mus_KA	FR8	M.m.dom_FR	-3.20253	Unrelated
KA3	M.m.mus_KA	IR1	M.m.dom_IR	-2.69997	Unrelated
KA3	M.m.mus_KA	IR2	M.m.dom_IR	-2.63358	Unrelated
KA3	M.m.mus_KA	IR3	M.m.dom_IR	-2.80974	Unrelated
KA3	M.m.mus_KA	IR4	M.m.dom_IR	-2.62224	Unrelated
KA3	M.m.mus_KA	IR5	M.m.dom_IR	-2.5249	Unrelated
KA3	M.m.mus_KA	IR6	M.m.dom_IR	-2.89925	Unrelated
KA3	M.m.mus_KA	IR7	M.m.dom_IR	-2.66943	Unrelated
KA3	M.m.mus_KA	IR8	M.m.dom_IR	-2.83424	Unrelated
KA3	M.m.mus_KA	KA1	M.m.mus_KA	-0.1655	Unrelated
KA3	M.m.mus_KA	KA2	M.m.mus_KA	-0.240227	Unrelated
KA3	M.m.mus_KA	KA4	M.m.mus_KA	-0.146975	Unrelated
KA3	M.m.mus_KA	KA5	M.m.mus_KA	-0.199278	Unrelated
KA3	M.m.mus_KA	KA6	M.m.mus_KA	-0.205337	Unrelated
KA3	M.m.mus_KA	KA7	M.m.mus_KA	-0.197165	Unrelated
KA3	M.m.mus_KA	KA8	M.m.mus_KA	-0.174245	Unrelated
KA3	M.m.mus_KA	TA1	M.m.cas_TA	-3.1779	Unrelated
KA3	M.m.mus_KA	TA2	M.m.cas_TA	-3.26492	Unrelated
KA3	M.m.mus_KA	TA3	M.m.cas_TA	-3.22655	Unrelated
KA3	M.m.mus_KA	TA4	M.m.cas_TA	-3.03053	Unrelated
KA3	M.m.mus_KA	TA5	M.m.cas_TA	-2.75483	Unrelated
KA3	M.m.mus_KA	TA6	M.m.cas_TA	-2.9226	Unrelated
KA3	M.m.mus_KA	TA7	M.m.cas_TA	-3.02693	Unrelated
KA3	M.m.mus_KA	TA8	M.m.cas_TA	-3.25	Unrelated
KA3	M.m.mus_KA	SL1	M.spretus	-12.0558	Unrelated
KA3	M.m.mus_KA	SL2	M.spretus	-11.6798	Unrelated
KA3	M.m.mus_KA	SL3	M.spretus	-11.9321	Unrelated
KA3	M.m.mus_KA	SL4	M.spretus	-11.763	Unrelated
KA3	M.m.mus_KA	SP1	M.spicilegus	-7.72393	Unrelated
KA3	M.m.mus_KA	SP2	M.spicilegus	-8.42576	Unrelated
KA3	M.m.mus_KA	SP3	M.spicilegus	-8.30664	Unrelated
KA3	M.m.mus_KA	SP4	M.spicilegus	-8.20329	Unrelated
KA4	M.m.mus_KA	GE1	M.m.dom_GE	-3.1372	Unrelated
KA4	M.m.mus_KA	GE2	M.m.dom_GE	-3.22696	Unrelated
KA4	M.m.mus_KA	GE3	M.m.dom_GE	-3.09313	Unrelated
KA4	M.m.mus_KA	GE4	M.m.dom_GE	-3.26095	Unrelated
KA4	M.m.mus_KA	GE5	M.m.dom_GE	-3.16245	Unrelated
KA4	M.m.mus_KA	GE6	M.m.dom_GE	-3.16094	Unrelated
KA4	M.m.mus_KA	GE7	M.m.dom_GE	-3.15129	Unrelated
KA4	M.m.mus_KA	GE8	M.m.dom_GE	-3.16274	Unrelated
KA4	M.m.mus_KA	FR1	M.m.dom_FR	-2.89616	Unrelated
KA4	M.m.mus_KA	FR2	M.m.dom_FR	-3.0851	Unrelated
KA4	M.m.mus_KA	FR3	M.m.dom_FR	-3.07663	Unrelated
KA4	M.m.mus_KA	FR4	M.m.dom_FR	-3.07153	Unrelated
KA4	M.m.mus_KA	FR5	M.m.dom_FR	-2.85041	Unrelated
KA4	M.m.mus_KA	FR6	M.m.dom_FR	-2.99045	Unrelated
KA4	M.m.mus_KA	FR7	M.m.dom_FR	-2.97086	Unrelated
KA4	M.m.mus_KA	FR8	M.m.dom_FR	-3.15836	Unrelated
KA4	M.m.mus_KA	IR1	M.m.dom_IR	-2.64697	Unrelated
KA4	M.m.mus_KA	IR2	M.m.dom_IR	-2.58488	Unrelated
KA4	M.m.mus_KA	IR3	M.m.dom_IR	-2.75939	Unrelated
KA4	M.m.mus_KA	IR4	M.m.dom_IR	-2.57727	Unrelated
KA4	M.m.mus_KA	IR5	M.m.dom_IR	-2.48257	Unrelated
KA4	M.m.mus_KA	IR6	M.m.dom_IR	-2.85191	Unrelated
KA4	M.m.mus_KA	IR7	M.m.dom_IR	-2.61858	Unrelated
KA4	M.m.mus_KA	IR8	M.m.dom_IR	-2.78562	Unrelated
KA4	M.m.mus_KA	KA1	M.m.mus_KA	-0.18943	Unrelated
KA4	M.m.mus_KA	KA2	M.m.mus_KA	-0.225936	Unrelated
KA4	M.m.mus_KA	KA3	M.m.mus_KA	-0.146975	Unrelated
KA4	M.m.mus_KA	KA5	M.m.mus_KA	-0.145156	Unrelated
KA4	M.m.mus_KA	KA6	M.m.mus_KA	-0.24349	Unrelated
KA4	M.m.mus_KA	KA7	M.m.mus_KA	-0.164461	Unrelated
KA4	M.m.mus_KA	KA8	M.m.mus_KA	-0.147265	Unrelated
KA4	M.m.mus_KA	TA1	M.m.cas_TA	-3.17197	Unrelated
KA4	M.m.mus_KA	TA2	M.m.cas_TA	-3.25589	Unrelated
KA4	M.m.mus_KA	TA3	M.m.cas_TA	-3.23004	Unrelated
KA4	M.m.mus_KA	TA4	M.m.cas_TA	-3.02659	Unrelated
KA4	M.m.mus_KA	TA5	M.m.cas_TA	-2.75142	Unrelated
KA4	M.m.mus_KA	TA6	M.m.cas_TA	-2.91082	Unrelated
KA4	M.m.mus_KA	TA7	M.m.cas_TA	-3.01832	Unrelated
KA4	M.m.mus_KA	TA8	M.m.cas_TA	-3.25688	Unrelated
KA4	M.m.mus_KA	SL1	M.spretus	-12.0035	Unrelated
KA4	M.m.mus_KA	SL2	M.spretus	-11.6387	Unrelated
KA4	M.m.mus_KA	SL3	M.spretus	-11.8762	Unrelated
KA4	M.m.mus_KA	SL4	M.spretus	-11.7172	Unrelated
KA4	M.m.mus_KA	SP1	M.spicilegus	-7.694	Unrelated
KA4	M.m.mus_KA	SP2	M.spicilegus	-8.39403	Unrelated
KA4	M.m.mus_KA	SP3	M.spicilegus	-8.27757	Unrelated
KA4	M.m.mus_KA	SP4	M.spicilegus	-8.17502	Unrelated
KA5	M.m.mus_KA	GE1	M.m.dom_GE	-3.26978	Unrelated
KA5	M.m.mus_KA	GE2	M.m.dom_GE	-3.36669	Unrelated
KA5	M.m.mus_KA	GE3	M.m.dom_GE	-3.23113	Unrelated
KA5	M.m.mus_KA	GE4	M.m.dom_GE	-3.41613	Unrelated
KA5	M.m.mus_KA	GE5	M.m.dom_GE	-3.30675	Unrelated
KA5	M.m.mus_KA	GE6	M.m.dom_GE	-3.30664	Unrelated
KA5	M.m.mus_KA	GE7	M.m.dom_GE	-3.28882	Unrelated
KA5	M.m.mus_KA	GE8	M.m.dom_GE	-3.30175	Unrelated
KA5	M.m.mus_KA	FR1	M.m.dom_FR	-3.02601	Unrelated
KA5	M.m.mus_KA	FR2	M.m.dom_FR	-3.23121	Unrelated
KA5	M.m.mus_KA	FR3	M.m.dom_FR	-3.21213	Unrelated
KA5	M.m.mus_KA	FR4	M.m.dom_FR	-3.21272	Unrelated
KA5	M.m.mus_KA	FR5	M.m.dom_FR	-2.96683	Unrelated
KA5	M.m.mus_KA	FR6	M.m.dom_FR	-3.12513	Unrelated
KA5	M.m.mus_KA	FR7	M.m.dom_FR	-3.10141	Unrelated
KA5	M.m.mus_KA	FR8	M.m.dom_FR	-3.29594	Unrelated
KA5	M.m.mus_KA	IR1	M.m.dom_IR	-2.7472	Unrelated
KA5	M.m.mus_KA	IR2	M.m.dom_IR	-2.6798	Unrelated
KA5	M.m.mus_KA	IR3	M.m.dom_IR	-2.87133	Unrelated
KA5	M.m.mus_KA	IR4	M.m.dom_IR	-2.67764	Unrelated
KA5	M.m.mus_KA	IR5	M.m.dom_IR	-2.56814	Unrelated
KA5	M.m.mus_KA	IR6	M.m.dom_IR	-2.96941	Unrelated
KA5	M.m.mus_KA	IR7	M.m.dom_IR	-2.72357	Unrelated
KA5	M.m.mus_KA	IR8	M.m.dom_IR	-2.89367	Unrelated
KA5	M.m.mus_KA	KA1	M.m.mus_KA	-0.215512	Unrelated
KA5	M.m.mus_KA	KA2	M.m.mus_KA	-0.263797	Unrelated
KA5	M.m.mus_KA	KA3	M.m.mus_KA	-0.199278	Unrelated
KA5	M.m.mus_KA	KA4	M.m.mus_KA	-0.145156	Unrelated
KA5	M.m.mus_KA	KA6	M.m.mus_KA	-0.290442	Unrelated
KA5	M.m.mus_KA	KA7	M.m.mus_KA	-0.191316	Unrelated
KA5	M.m.mus_KA	KA8	M.m.mus_KA	-0.195186	Unrelated
KA5	M.m.mus_KA	TA1	M.m.cas_TA	-3.3061	Unrelated
KA5	M.m.mus_KA	TA2	M.m.cas_TA	-3.38944	Unrelated
KA5	M.m.mus_KA	TA3	M.m.cas_TA	-3.35387	Unrelated
KA5	M.m.mus_KA	TA4	M.m.cas_TA	-3.14222	Unrelated
KA5	M.m.mus_KA	TA5	M.m.cas_TA	-2.83529	Unrelated
KA5	M.m.mus_KA	TA6	M.m.cas_TA	-3.02408	Unrelated
KA5	M.m.mus_KA	TA7	M.m.cas_TA	-3.13318	Unrelated
KA5	M.m.mus_KA	TA8	M.m.cas_TA	-3.38543	Unrelated
KA5	M.m.mus_KA	SL1	M.spretus	-12.7287	Unrelated
KA5	M.m.mus_KA	SL2	M.spretus	-12.3285	Unrelated
KA5	M.m.mus_KA	SL3	M.spretus	-12.5901	Unrelated
KA5	M.m.mus_KA	SL4	M.spretus	-12.4171	Unrelated
KA5	M.m.mus_KA	SP1	M.spicilegus	-7.97331	Unrelated
KA5	M.m.mus_KA	SP2	M.spicilegus	-8.72481	Unrelated
KA5	M.m.mus_KA	SP3	M.spicilegus	-8.60063	Unrelated
KA5	M.m.mus_KA	SP4	M.spicilegus	-8.49196	Unrelated
KA6	M.m.mus_KA	GE1	M.m.dom_GE	-3.27879	Unrelated
KA6	M.m.mus_KA	GE2	M.m.dom_GE	-3.38632	Unrelated
KA6	M.m.mus_KA	GE3	M.m.dom_GE	-3.24578	Unrelated
KA6	M.m.mus_KA	GE4	M.m.dom_GE	-3.42206	Unrelated
KA6	M.m.mus_KA	GE5	M.m.dom_GE	-3.31877	Unrelated
KA6	M.m.mus_KA	GE6	M.m.dom_GE	-3.32006	Unrelated
KA6	M.m.mus_KA	GE7	M.m.dom_GE	-3.302	Unrelated
KA6	M.m.mus_KA	GE8	M.m.dom_GE	-3.31678	Unrelated
KA6	M.m.mus_KA	FR1	M.m.dom_FR	-3.0505	Unrelated
KA6	M.m.mus_KA	FR2	M.m.dom_FR	-3.23148	Unrelated
KA6	M.m.mus_KA	FR3	M.m.dom_FR	-3.20867	Unrelated
KA6	M.m.mus_KA	FR4	M.m.dom_FR	-3.21068	Unrelated
KA6	M.m.mus_KA	FR5	M.m.dom_FR	-2.99288	Unrelated
KA6	M.m.mus_KA	FR6	M.m.dom_FR	-3.12535	Unrelated
KA6	M.m.mus_KA	FR7	M.m.dom_FR	-3.14301	Unrelated
KA6	M.m.mus_KA	FR8	M.m.dom_FR	-3.3068	Unrelated
KA6	M.m.mus_KA	IR1	M.m.dom_IR	-2.77859	Unrelated
KA6	M.m.mus_KA	IR2	M.m.dom_IR	-2.69754	Unrelated
KA6	M.m.mus_KA	IR3	M.m.dom_IR	-2.88784	Unrelated
KA6	M.m.mus_KA	IR4	M.m.dom_IR	-2.69838	Unrelated
KA6	M.m.mus_KA	IR5	M.m.dom_IR	-2.59177	Unrelated
KA6	M.m.mus_KA	IR6	M.m.dom_IR	-2.96736	Unrelated
KA6	M.m.mus_KA	IR7	M.m.dom_IR	-2.74361	Unrelated
KA6	M.m.mus_KA	IR8	M.m.dom_IR	-2.91103	Unrelated
KA6	M.m.mus_KA	KA1	M.m.mus_KA	-0.201832	Unrelated
KA6	M.m.mus_KA	KA2	M.m.mus_KA	-0.246561	Unrelated
KA6	M.m.mus_KA	KA3	M.m.mus_KA	-0.205337	Unrelated
KA6	M.m.mus_KA	KA4	M.m.mus_KA	-0.24349	Unrelated
KA6	M.m.mus_KA	KA5	M.m.mus_KA	-0.290442	Unrelated
KA6	M.m.mus_KA	KA7	M.m.mus_KA	-0.229126	Unrelated
KA6	M.m.mus_KA	KA8	M.m.mus_KA	-0.230392	Unrelated
KA6	M.m.mus_KA	TA1	M.m.cas_TA	-3.29207	Unrelated
KA6	M.m.mus_KA	TA2	M.m.cas_TA	-3.38413	Unrelated
KA6	M.m.mus_KA	TA3	M.m.cas_TA	-3.34975	Unrelated
KA6	M.m.mus_KA	TA4	M.m.cas_TA	-3.14376	Unrelated
KA6	M.m.mus_KA	TA5	M.m.cas_TA	-2.85156	Unrelated
KA6	M.m.mus_KA	TA6	M.m.cas_TA	-3.0146	Unrelated
KA6	M.m.mus_KA	TA7	M.m.cas_TA	-3.13148	Unrelated
KA6	M.m.mus_KA	TA8	M.m.cas_TA	-3.38722	Unrelated
KA6	M.m.mus_KA	SL1	M.spretus	-12.6048	Unrelated
KA6	M.m.mus_KA	SL2	M.spretus	-12.214	Unrelated
KA6	M.m.mus_KA	SL3	M.spretus	-12.4813	Unrelated
KA6	M.m.mus_KA	SL4	M.spretus	-12.3091	Unrelated
KA6	M.m.mus_KA	SP1	M.spicilegus	-7.94676	Unrelated
KA6	M.m.mus_KA	SP2	M.spicilegus	-8.68866	Unrelated
KA6	M.m.mus_KA	SP3	M.spicilegus	-8.56192	Unrelated
KA6	M.m.mus_KA	SP4	M.spicilegus	-8.45186	Unrelated
KA7	M.m.mus_KA	GE1	M.m.dom_GE	-3.11911	Unrelated
KA7	M.m.mus_KA	GE2	M.m.dom_GE	-3.20983	Unrelated
KA7	M.m.mus_KA	GE3	M.m.dom_GE	-3.08215	Unrelated
KA7	M.m.mus_KA	GE4	M.m.dom_GE	-3.24547	Unrelated
KA7	M.m.mus_KA	GE5	M.m.dom_GE	-3.15363	Unrelated
KA7	M.m.mus_KA	GE6	M.m.dom_GE	-3.149	Unrelated
KA7	M.m.mus_KA	GE7	M.m.dom_GE	-3.13523	Unrelated
KA7	M.m.mus_KA	GE8	M.m.dom_GE	-3.15071	Unrelated
KA7	M.m.mus_KA	FR1	M.m.dom_FR	-2.88417	Unrelated
KA7	M.m.mus_KA	FR2	M.m.dom_FR	-3.08112	Unrelated
KA7	M.m.mus_KA	FR3	M.m.dom_FR	-3.06998	Unrelated
KA7	M.m.mus_KA	FR4	M.m.dom_FR	-3.06113	Unrelated
KA7	M.m.mus_KA	FR5	M.m.dom_FR	-2.83361	Unrelated
KA7	M.m.mus_KA	FR6	M.m.dom_FR	-2.97898	Unrelated
KA7	M.m.mus_KA	FR7	M.m.dom_FR	-2.96396	Unrelated
KA7	M.m.mus_KA	FR8	M.m.dom_FR	-3.14131	Unrelated
KA7	M.m.mus_KA	IR1	M.m.dom_IR	-2.63938	Unrelated
KA7	M.m.mus_KA	IR2	M.m.dom_IR	-2.57488	Unrelated
KA7	M.m.mus_KA	IR3	M.m.dom_IR	-2.75316	Unrelated
KA7	M.m.mus_KA	IR4	M.m.dom_IR	-2.57143	Unrelated
KA7	M.m.mus_KA	IR5	M.m.dom_IR	-2.47042	Unrelated
KA7	M.m.mus_KA	IR6	M.m.dom_IR	-2.8386	Unrelated
KA7	M.m.mus_KA	IR7	M.m.dom_IR	-2.60753	Unrelated
KA7	M.m.mus_KA	IR8	M.m.dom_IR	-2.76842	Unrelated
KA7	M.m.mus_KA	KA1	M.m.mus_KA	-0.213992	Unrelated
KA7	M.m.mus_KA	KA2	M.m.mus_KA	-0.213621	Unrelated
KA7	M.m.mus_KA	KA3	M.m.mus_KA	-0.197165	Unrelated
KA7	M.m.mus_KA	KA4	M.m.mus_KA	-0.164461	Unrelated
KA7	M.m.mus_KA	KA5	M.m.mus_KA	-0.191316	Unrelated
KA7	M.m.mus_KA	KA6	M.m.mus_KA	-0.229126	Unrelated
KA7	M.m.mus_KA	KA8	M.m.mus_KA	-0.130614	Unrelated
KA7	M.m.mus_KA	TA1	M.m.cas_TA	-3.13472	Unrelated
KA7	M.m.mus_KA	TA2	M.m.cas_TA	-3.22508	Unrelated
KA7	M.m.mus_KA	TA3	M.m.cas_TA	-3.17212	Unrelated
KA7	M.m.mus_KA	TA4	M.m.cas_TA	-2.98536	Unrelated
KA7	M.m.mus_KA	TA5	M.m.cas_TA	-2.71712	Unrelated
KA7	M.m.mus_KA	TA6	M.m.cas_TA	-2.88939	Unrelated
KA7	M.m.mus_KA	TA7	M.m.cas_TA	-2.97859	Unrelated
KA7	M.m.mus_KA	TA8	M.m.cas_TA	-3.21843	Unrelated
KA7	M.m.mus_KA	SL1	M.spretus	-11.9476	Unrelated
KA7	M.m.mus_KA	SL2	M.spretus	-11.5835	Unrelated
KA7	M.m.mus_KA	SL3	M.spretus	-11.8224	Unrelated
KA7	M.m.mus_KA	SL4	M.spretus	-11.6645	Unrelated
KA7	M.m.mus_KA	SP1	M.spicilegus	-7.68291	Unrelated
KA7	M.m.mus_KA	SP2	M.spicilegus	-8.37445	Unrelated
KA7	M.m.mus_KA	SP3	M.spicilegus	-8.25458	Unrelated
KA7	M.m.mus_KA	SP4	M.spicilegus	-8.16579	Unrelated
KA8	M.m.mus_KA	GE1	M.m.dom_GE	-3.15376	Unrelated
KA8	M.m.mus_KA	GE2	M.m.dom_GE	-3.24919	Unrelated
KA8	M.m.mus_KA	GE3	M.m.dom_GE	-3.11629	Unrelated
KA8	M.m.mus_KA	GE4	M.m.dom_GE	-3.28849	Unrelated
KA8	M.m.mus_KA	GE5	M.m.dom_GE	-3.18748	Unrelated
KA8	M.m.mus_KA	GE6	M.m.dom_GE	-3.18726	Unrelated
KA8	M.m.mus_KA	GE7	M.m.dom_GE	-3.17394	Unrelated
KA8	M.m.mus_KA	GE8	M.m.dom_GE	-3.18602	Unrelated
KA8	M.m.mus_KA	FR1	M.m.dom_FR	-2.91016	Unrelated
KA8	M.m.mus_KA	FR2	M.m.dom_FR	-3.10952	Unrelated
KA8	M.m.mus_KA	FR3	M.m.dom_FR	-3.09393	Unrelated
KA8	M.m.mus_KA	FR4	M.m.dom_FR	-3.09646	Unrelated
KA8	M.m.mus_KA	FR5	M.m.dom_FR	-2.86702	Unrelated
KA8	M.m.mus_KA	FR6	M.m.dom_FR	-3.01199	Unrelated
KA8	M.m.mus_KA	FR7	M.m.dom_FR	-2.99626	Unrelated
KA8	M.m.mus_KA	FR8	M.m.dom_FR	-3.17736	Unrelated
KA8	M.m.mus_KA	IR1	M.m.dom_IR	-2.67516	Unrelated
KA8	M.m.mus_KA	IR2	M.m.dom_IR	-2.60777	Unrelated
KA8	M.m.mus_KA	IR3	M.m.dom_IR	-2.77444	Unrelated
KA8	M.m.mus_KA	IR4	M.m.dom_IR	-2.59824	Unrelated
KA8	M.m.mus_KA	IR5	M.m.dom_IR	-2.49956	Unrelated
KA8	M.m.mus_KA	IR6	M.m.dom_IR	-2.87118	Unrelated
KA8	M.m.mus_KA	IR7	M.m.dom_IR	-2.63939	Unrelated
KA8	M.m.mus_KA	IR8	M.m.dom_IR	-2.80083	Unrelated
KA8	M.m.mus_KA	KA1	M.m.mus_KA	-0.14829	Unrelated
KA8	M.m.mus_KA	KA2	M.m.mus_KA	-0.253691	Unrelated
KA8	M.m.mus_KA	KA3	M.m.mus_KA	-0.174245	Unrelated
KA8	M.m.mus_KA	KA4	M.m.mus_KA	-0.147265	Unrelated
KA8	M.m.mus_KA	KA5	M.m.mus_KA	-0.195186	Unrelated
KA8	M.m.mus_KA	KA6	M.m.mus_KA	-0.230392	Unrelated
KA8	M.m.mus_KA	KA7	M.m.mus_KA	-0.130614	Unrelated
KA8	M.m.mus_KA	TA1	M.m.cas_TA	-3.19119	Unrelated
KA8	M.m.mus_KA	TA2	M.m.cas_TA	-3.28877	Unrelated
KA8	M.m.mus_KA	TA3	M.m.cas_TA	-3.24553	Unrelated
KA8	M.m.mus_KA	TA4	M.m.cas_TA	-3.04186	Unrelated
KA8	M.m.mus_KA	TA5	M.m.cas_TA	-2.76949	Unrelated
KA8	M.m.mus_KA	TA6	M.m.cas_TA	-2.9337	Unrelated
KA8	M.m.mus_KA	TA7	M.m.cas_TA	-3.0469	Unrelated
KA8	M.m.mus_KA	TA8	M.m.cas_TA	-3.26487	Unrelated
KA8	M.m.mus_KA	SL1	M.spretus	-12.1261	Unrelated
KA8	M.m.mus_KA	SL2	M.spretus	-11.7464	Unrelated
KA8	M.m.mus_KA	SL3	M.spretus	-11.9949	Unrelated
KA8	M.m.mus_KA	SL4	M.spretus	-11.837	Unrelated
KA8	M.m.mus_KA	SP1	M.spicilegus	-7.74803	Unrelated
KA8	M.m.mus_KA	SP2	M.spicilegus	-8.44978	Unrelated
KA8	M.m.mus_KA	SP3	M.spicilegus	-8.33356	Unrelated
KA8	M.m.mus_KA	SP4	M.spicilegus	-8.23858	Unrelated
TA1	M.m.cas_TA	GE1	M.m.dom_GE	-3.73003	Unrelated
TA1	M.m.cas_TA	GE2	M.m.dom_GE	-3.86056	Unrelated
TA1	M.m.cas_TA	GE3	M.m.dom_GE	-3.69538	Unrelated
TA1	M.m.cas_TA	GE4	M.m.dom_GE	-3.913	Unrelated
TA1	M.m.cas_TA	GE5	M.m.dom_GE	-3.80043	Unrelated
TA1	M.m.cas_TA	GE6	M.m.dom_GE	-3.79563	Unrelated
TA1	M.m.cas_TA	GE7	M.m.dom_GE	-3.76857	Unrelated
TA1	M.m.cas_TA	GE8	M.m.dom_GE	-3.77927	Unrelated
TA1	M.m.cas_TA	FR1	M.m.dom_FR	-3.47727	Unrelated
TA1	M.m.cas_TA	FR2	M.m.dom_FR	-3.69231	Unrelated
TA1	M.m.cas_TA	FR3	M.m.dom_FR	-3.65519	Unrelated
TA1	M.m.cas_TA	FR4	M.m.dom_FR	-3.65559	Unrelated
TA1	M.m.cas_TA	FR5	M.m.dom_FR	-3.41248	Unrelated
TA1	M.m.cas_TA	FR6	M.m.dom_FR	-3.58609	Unrelated
TA1	M.m.cas_TA	FR7	M.m.dom_FR	-3.60106	Unrelated
TA1	M.m.cas_TA	FR8	M.m.dom_FR	-3.78611	Unrelated
TA1	M.m.cas_TA	IR1	M.m.dom_IR	-3.09945	Unrelated
TA1	M.m.cas_TA	IR2	M.m.dom_IR	-2.99754	Unrelated
TA1	M.m.cas_TA	IR3	M.m.dom_IR	-3.23503	Unrelated
TA1	M.m.cas_TA	IR4	M.m.dom_IR	-3.00142	Unrelated
TA1	M.m.cas_TA	IR5	M.m.dom_IR	-2.84416	Unrelated
TA1	M.m.cas_TA	IR6	M.m.dom_IR	-3.32897	Unrelated
TA1	M.m.cas_TA	IR7	M.m.dom_IR	-3.06621	Unrelated
TA1	M.m.cas_TA	IR8	M.m.dom_IR	-3.27469	Unrelated
TA1	M.m.cas_TA	KA1	M.m.mus_KA	-3.1786	Unrelated
TA1	M.m.cas_TA	KA2	M.m.mus_KA	-3.41078	Unrelated
TA1	M.m.cas_TA	KA3	M.m.mus_KA	-3.1779	Unrelated
TA1	M.m.cas_TA	KA4	M.m.mus_KA	-3.17197	Unrelated
TA1	M.m.cas_TA	KA5	M.m.mus_KA	-3.3061	Unrelated
TA1	M.m.cas_TA	KA6	M.m.mus_KA	-3.29207	Unrelated
TA1	M.m.cas_TA	KA7	M.m.mus_KA	-3.13472	Unrelated
TA1	M.m.cas_TA	KA8	M.m.mus_KA	-3.19119	Unrelated
TA1	M.m.cas_TA	TA2	M.m.cas_TA	-0.307513	Unrelated
TA1	M.m.cas_TA	TA3	M.m.cas_TA	-0.383117	Unrelated
TA1	M.m.cas_TA	TA4	M.m.cas_TA	-0.314895	Unrelated
TA1	M.m.cas_TA	TA5	M.m.cas_TA	-0.0799523	Unrelated
TA1	M.m.cas_TA	TA6	M.m.cas_TA	-0.273483	Unrelated
TA1	M.m.cas_TA	TA7	M.m.cas_TA	-0.135394	Unrelated
TA1	M.m.cas_TA	TA8	M.m.cas_TA	-0.425139	Unrelated
TA1	M.m.cas_TA	SL1	M.spretus	-16.0073	Unrelated
TA1	M.m.cas_TA	SL2	M.spretus	-15.416	Unrelated
TA1	M.m.cas_TA	SL3	M.spretus	-15.8387	Unrelated
TA1	M.m.cas_TA	SL4	M.spretus	-15.5587	Unrelated
TA1	M.m.cas_TA	SP1	M.spicilegus	-9.1135	Unrelated
TA1	M.m.cas_TA	SP2	M.spicilegus	-10.0853	Unrelated
TA1	M.m.cas_TA	SP3	M.spicilegus	-9.92989	Unrelated
TA1	M.m.cas_TA	SP4	M.spicilegus	-9.77307	Unrelated
TA2	M.m.cas_TA	GE1	M.m.dom_GE	-3.81321	Unrelated
TA2	M.m.cas_TA	GE2	M.m.dom_GE	-3.95316	Unrelated
TA2	M.m.cas_TA	GE3	M.m.dom_GE	-3.7736	Unrelated
TA2	M.m.cas_TA	GE4	M.m.dom_GE	-4.01174	Unrelated
TA2	M.m.cas_TA	GE5	M.m.dom_GE	-3.88601	Unrelated
TA2	M.m.cas_TA	GE6	M.m.dom_GE	-3.88105	Unrelated
TA2	M.m.cas_TA	GE7	M.m.dom_GE	-3.85541	Unrelated
TA2	M.m.cas_TA	GE8	M.m.dom_GE	-3.87654	Unrelated
TA2	M.m.cas_TA	FR1	M.m.dom_FR	-3.55205	Unrelated
TA2	M.m.cas_TA	FR2	M.m.dom_FR	-3.77051	Unrelated
TA2	M.m.cas_TA	FR3	M.m.dom_FR	-3.73893	Unrelated
TA2	M.m.cas_TA	FR4	M.m.dom_FR	-3.73691	Unrelated
TA2	M.m.cas_TA	FR5	M.m.dom_FR	-3.48226	Unrelated
TA2	M.m.cas_TA	FR6	M.m.dom_FR	-3.66085	Unrelated
TA2	M.m.cas_TA	FR7	M.m.dom_FR	-3.66969	Unrelated
TA2	M.m.cas_TA	FR8	M.m.dom_FR	-3.86348	Unrelated
TA2	M.m.cas_TA	IR1	M.m.dom_IR	-3.15041	Unrelated
TA2	M.m.cas_TA	IR2	M.m.dom_IR	-3.05306	Unrelated
TA2	M.m.cas_TA	IR3	M.m.dom_IR	-3.29702	Unrelated
TA2	M.m.cas_TA	IR4	M.m.dom_IR	-3.06128	Unrelated
TA2	M.m.cas_TA	IR5	M.m.dom_IR	-2.8902	Unrelated
TA2	M.m.cas_TA	IR6	M.m.dom_IR	-3.38945	Unrelated
TA2	M.m.cas_TA	IR7	M.m.dom_IR	-3.12624	Unrelated
TA2	M.m.cas_TA	IR8	M.m.dom_IR	-3.33986	Unrelated
TA2	M.m.cas_TA	KA1	M.m.mus_KA	-3.25545	Unrelated
TA2	M.m.cas_TA	KA2	M.m.mus_KA	-3.49716	Unrelated
TA2	M.m.cas_TA	KA3	M.m.mus_KA	-3.26492	Unrelated
TA2	M.m.cas_TA	KA4	M.m.mus_KA	-3.25589	Unrelated
TA2	M.m.cas_TA	KA5	M.m.mus_KA	-3.38944	Unrelated
TA2	M.m.cas_TA	KA6	M.m.mus_KA	-3.38413	Unrelated
TA2	M.m.cas_TA	KA7	M.m.mus_KA	-3.22508	Unrelated
TA2	M.m.cas_TA	KA8	M.m.mus_KA	-3.28877	Unrelated
TA2	M.m.cas_TA	TA1	M.m.cas_TA	-0.307513	Unrelated
TA2	M.m.cas_TA	TA3	M.m.cas_TA	-0.531412	Unrelated
TA2	M.m.cas_TA	TA4	M.m.cas_TA	-0.394772	Unrelated
TA2	M.m.cas_TA	TA5	M.m.cas_TA	-0.220606	Unrelated
TA2	M.m.cas_TA	TA6	M.m.cas_TA	-0.208703	Unrelated
TA2	M.m.cas_TA	TA7	M.m.cas_TA	-0.320638	Unrelated
TA2	M.m.cas_TA	TA8	M.m.cas_TA	-0.501647	Unrelated
TA2	M.m.cas_TA	SL1	M.spretus	-16.4442	Unrelated
TA2	M.m.cas_TA	SL2	M.spretus	-15.8577	Unrelated
TA2	M.m.cas_TA	SL3	M.spretus	-16.293	Unrelated
TA2	M.m.cas_TA	SL4	M.spretus	-15.9886	Unrelated
TA2	M.m.cas_TA	SP1	M.spicilegus	-9.24802	Unrelated
TA2	M.m.cas_TA	SP2	M.spicilegus	-10.2464	Unrelated
TA2	M.m.cas_TA	SP3	M.spicilegus	-10.0961	Unrelated
TA2	M.m.cas_TA	SP4	M.spicilegus	-9.91786	Unrelated
TA3	M.m.cas_TA	GE1	M.m.dom_GE	-3.80389	Unrelated
TA3	M.m.cas_TA	GE2	M.m.dom_GE	-3.92487	Unrelated
TA3	M.m.cas_TA	GE3	M.m.dom_GE	-3.77018	Unrelated
TA3	M.m.cas_TA	GE4	M.m.dom_GE	-3.98249	Unrelated
TA3	M.m.cas_TA	GE5	M.m.dom_GE	-3.87358	Unrelated
TA3	M.m.cas_TA	GE6	M.m.dom_GE	-3.87695	Unrelated
TA3	M.m.cas_TA	GE7	M.m.dom_GE	-3.83549	Unrelated
TA3	M.m.cas_TA	GE8	M.m.dom_GE	-3.85103	Unrelated
TA3	M.m.cas_TA	FR1	M.m.dom_FR	-3.53868	Unrelated
TA3	M.m.cas_TA	FR2	M.m.dom_FR	-3.76289	Unrelated
TA3	M.m.cas_TA	FR3	M.m.dom_FR	-3.73154	Unrelated
TA3	M.m.cas_TA	FR4	M.m.dom_FR	-3.73205	Unrelated
TA3	M.m.cas_TA	FR5	M.m.dom_FR	-3.46947	Unrelated
TA3	M.m.cas_TA	FR6	M.m.dom_FR	-3.6573	Unrelated
TA3	M.m.cas_TA	FR7	M.m.dom_FR	-3.66079	Unrelated
TA3	M.m.cas_TA	FR8	M.m.dom_FR	-3.84497	Unrelated
TA3	M.m.cas_TA	IR1	M.m.dom_IR	-3.13718	Unrelated
TA3	M.m.cas_TA	IR2	M.m.dom_IR	-3.03687	Unrelated
TA3	M.m.cas_TA	IR3	M.m.dom_IR	-3.27083	Unrelated
TA3	M.m.cas_TA	IR4	M.m.dom_IR	-3.04198	Unrelated
TA3	M.m.cas_TA	IR5	M.m.dom_IR	-2.88966	Unrelated
TA3	M.m.cas_TA	IR6	M.m.dom_IR	-3.38399	Unrelated
TA3	M.m.cas_TA	IR7	M.m.dom_IR	-3.11322	Unrelated
TA3	M.m.cas_TA	IR8	M.m.dom_IR	-3.32747	Unrelated
TA3	M.m.cas_TA	KA1	M.m.mus_KA	-3.22717	Unrelated
TA3	M.m.cas_TA	KA2	M.m.mus_KA	-3.45785	Unrelated
TA3	M.m.cas_TA	KA3	M.m.mus_KA	-3.22655	Unrelated
TA3	M.m.cas_TA	KA4	M.m.mus_KA	-3.23004	Unrelated
TA3	M.m.cas_TA	KA5	M.m.mus_KA	-3.35387	Unrelated
TA3	M.m.cas_TA	KA6	M.m.mus_KA	-3.34975	Unrelated
TA3	M.m.cas_TA	KA7	M.m.mus_KA	-3.17212	Unrelated
TA3	M.m.cas_TA	KA8	M.m.mus_KA	-3.24553	Unrelated
TA3	M.m.cas_TA	TA1	M.m.cas_TA	-0.383117	Unrelated
TA3	M.m.cas_TA	TA2	M.m.cas_TA	-0.531412	Unrelated
TA3	M.m.cas_TA	TA4	M.m.cas_TA	-0.293833	Unrelated
TA3	M.m.cas_TA	TA5	M.m.cas_TA	-0.192524	Unrelated
TA3	M.m.cas_TA	TA6	M.m.cas_TA	-0.372689	Unrelated
TA3	M.m.cas_TA	TA7	M.m.cas_TA	-0.296345	Unrelated
TA3	M.m.cas_TA	TA8	M.m.cas_TA	-0.212816	Unrelated
TA3	M.m.cas_TA	SL1	M.spretus	-16.2782	Unrelated
TA3	M.m.cas_TA	SL2	M.spretus	-15.6987	Unrelated
TA3	M.m.cas_TA	SL3	M.spretus	-16.1106	Unrelated
TA3	M.m.cas_TA	SL4	M.spretus	-15.8392	Unrelated
TA3	M.m.cas_TA	SP1	M.spicilegus	-9.19775	Unrelated
TA3	M.m.cas_TA	SP2	M.spicilegus	-10.1786	Unrelated
TA3	M.m.cas_TA	SP3	M.spicilegus	-10.0263	Unrelated
TA3	M.m.cas_TA	SP4	M.spicilegus	-9.86593	Unrelated
TA4	M.m.cas_TA	GE1	M.m.dom_GE	-3.54094	Unrelated
TA4	M.m.cas_TA	GE2	M.m.dom_GE	-3.65232	Unrelated
TA4	M.m.cas_TA	GE3	M.m.dom_GE	-3.50481	Unrelated
TA4	M.m.cas_TA	GE4	M.m.dom_GE	-3.70427	Unrelated
TA4	M.m.cas_TA	GE5	M.m.dom_GE	-3.60887	Unrelated
TA4	M.m.cas_TA	GE6	M.m.dom_GE	-3.59967	Unrelated
TA4	M.m.cas_TA	GE7	M.m.dom_GE	-3.57085	Unrelated
TA4	M.m.cas_TA	GE8	M.m.dom_GE	-3.58296	Unrelated
TA4	M.m.cas_TA	FR1	M.m.dom_FR	-3.31465	Unrelated
TA4	M.m.cas_TA	FR2	M.m.dom_FR	-3.51077	Unrelated
TA4	M.m.cas_TA	FR3	M.m.dom_FR	-3.47742	Unrelated
TA4	M.m.cas_TA	FR4	M.m.dom_FR	-3.48076	Unrelated
TA4	M.m.cas_TA	FR5	M.m.dom_FR	-3.24455	Unrelated
TA4	M.m.cas_TA	FR6	M.m.dom_FR	-3.41657	Unrelated
TA4	M.m.cas_TA	FR7	M.m.dom_FR	-3.42514	Unrelated
TA4	M.m.cas_TA	FR8	M.m.dom_FR	-3.59515	Unrelated
TA4	M.m.cas_TA	IR1	M.m.dom_IR	-2.95453	Unrelated
TA4	M.m.cas_TA	IR2	M.m.dom_IR	-2.8612	Unrelated
TA4	M.m.cas_TA	IR3	M.m.dom_IR	-3.07728	Unrelated
TA4	M.m.cas_TA	IR4	M.m.dom_IR	-2.86915	Unrelated
TA4	M.m.cas_TA	IR5	M.m.dom_IR	-2.71645	Unrelated
TA4	M.m.cas_TA	IR6	M.m.dom_IR	-3.16661	Unrelated
TA4	M.m.cas_TA	IR7	M.m.dom_IR	-2.92564	Unrelated
TA4	M.m.cas_TA	IR8	M.m.dom_IR	-3.11788	Unrelated
TA4	M.m.cas_TA	KA1	M.m.mus_KA	-3.02384	Unrelated
TA4	M.m.cas_TA	KA2	M.m.mus_KA	-3.23291	Unrelated
TA4	M.m.cas_TA	KA3	M.m.mus_KA	-3.03053	Unrelated
TA4	M.m.cas_TA	KA4	M.m.mus_KA	-3.02659	Unrelated
TA4	M.m.cas_TA	KA5	M.m.mus_KA	-3.14222	Unrelated
TA4	M.m.cas_TA	KA6	M.m.mus_KA	-3.14376	Unrelated
TA4	M.m.cas_TA	KA7	M.m.mus_KA	-2.98536	Unrelated
TA4	M.m.cas_TA	KA8	M.m.mus_KA	-3.04186	Unrelated
TA4	M.m.cas_TA	TA1	M.m.cas_TA	-0.314895	Unrelated
TA4	M.m.cas_TA	TA2	M.m.cas_TA	-0.394772	Unrelated
TA4	M.m.cas_TA	TA3	M.m.cas_TA	-0.293833	Unrelated
TA4	M.m.cas_TA	TA5	M.m.cas_TA	-0.221461	Unrelated
TA4	M.m.cas_TA	TA6	M.m.cas_TA	-0.141667	Unrelated
TA4	M.m.cas_TA	TA7	M.m.cas_TA	-0.369971	Unrelated
TA4	M.m.cas_TA	TA8	M.m.cas_TA	-0.37928	Unrelated
TA4	M.m.cas_TA	SL1	M.spretus	-14.7906	Unrelated
TA4	M.m.cas_TA	SL2	M.spretus	-14.3	Unrelated
TA4	M.m.cas_TA	SL3	M.spretus	-14.6605	Unrelated
TA4	M.m.cas_TA	SL4	M.spretus	-14.4039	Unrelated
TA4	M.m.cas_TA	SP1	M.spicilegus	-8.69181	Unrelated
TA4	M.m.cas_TA	SP2	M.spicilegus	-9.57686	Unrelated
TA4	M.m.cas_TA	SP3	M.spicilegus	-9.43295	Unrelated
TA4	M.m.cas_TA	SP4	M.spicilegus	-9.30365	Unrelated
TA5	M.m.cas_TA	GE1	M.m.dom_GE	-3.18593	Unrelated
TA5	M.m.cas_TA	GE2	M.m.dom_GE	-3.29651	Unrelated
TA5	M.m.cas_TA	GE3	M.m.dom_GE	-3.15782	Unrelated
TA5	M.m.cas_TA	GE4	M.m.dom_GE	-3.3234	Unrelated
TA5	M.m.cas_TA	GE5	M.m.dom_GE	-3.24208	Unrelated
TA5	M.m.cas_TA	GE6	M.m.dom_GE	-3.24531	Unrelated
TA5	M.m.cas_TA	GE7	M.m.dom_GE	-3.2169	Unrelated
TA5	M.m.cas_TA	GE8	M.m.dom_GE	-3.22554	Unrelated
TA5	M.m.cas_TA	FR1	M.m.dom_FR	-2.99155	Unrelated
TA5	M.m.cas_TA	FR2	M.m.dom_FR	-3.16336	Unrelated
TA5	M.m.cas_TA	FR3	M.m.dom_FR	-3.13384	Unrelated
TA5	M.m.cas_TA	FR4	M.m.dom_FR	-3.12961	Unrelated
TA5	M.m.cas_TA	FR5	M.m.dom_FR	-2.93715	Unrelated
TA5	M.m.cas_TA	FR6	M.m.dom_FR	-3.08138	Unrelated
TA5	M.m.cas_TA	FR7	M.m.dom_FR	-3.08512	Unrelated
TA5	M.m.cas_TA	FR8	M.m.dom_FR	-3.23802	Unrelated
TA5	M.m.cas_TA	IR1	M.m.dom_IR	-2.69158	Unrelated
TA5	M.m.cas_TA	IR2	M.m.dom_IR	-2.61592	Unrelated
TA5	M.m.cas_TA	IR3	M.m.dom_IR	-2.80047	Unrelated
TA5	M.m.cas_TA	IR4	M.m.dom_IR	-2.61335	Unrelated
TA5	M.m.cas_TA	IR5	M.m.dom_IR	-2.48895	Unrelated
TA5	M.m.cas_TA	IR6	M.m.dom_IR	-2.88025	Unrelated
TA5	M.m.cas_TA	IR7	M.m.dom_IR	-2.67539	Unrelated
TA5	M.m.cas_TA	IR8	M.m.dom_IR	-2.83798	Unrelated
TA5	M.m.cas_TA	KA1	M.m.mus_KA	-2.74414	Unrelated
TA5	M.m.cas_TA	KA2	M.m.mus_KA	-2.92492	Unrelated
TA5	M.m.cas_TA	KA3	M.m.mus_KA	-2.75483	Unrelated
TA5	M.m.cas_TA	KA4	M.m.mus_KA	-2.75142	Unrelated
TA5	M.m.cas_TA	KA5	M.m.mus_KA	-2.83529	Unrelated
TA5	M.m.cas_TA	KA6	M.m.mus_KA	-2.85156	Unrelated
TA5	M.m.cas_TA	KA7	M.m.mus_KA	-2.71712	Unrelated
TA5	M.m.cas_TA	KA8	M.m.mus_KA	-2.76949	Unrelated
TA5	M.m.cas_TA	TA1	M.m.cas_TA	-0.0799523	Unrelated
TA5	M.m.cas_TA	TA2	M.m.cas_TA	-0.220606	Unrelated
TA5	M.m.cas_TA	TA3	M.m.cas_TA	-0.192524	Unrelated
TA5	M.m.cas_TA	TA4	M.m.cas_TA	-0.221461	Unrelated
TA5	M.m.cas_TA	TA6	M.m.cas_TA	-0.146822	Unrelated
TA5	M.m.cas_TA	TA7	M.m.cas_TA	-0.080639	Unrelated
TA5	M.m.cas_TA	TA8	M.m.cas_TA	-0.184295	Unrelated
TA5	M.m.cas_TA	SL1	M.spretus	-12.9902	Unrelated
TA5	M.m.cas_TA	SL2	M.spretus	-12.5594	Unrelated
TA5	M.m.cas_TA	SL3	M.spretus	-12.8548	Unrelated
TA5	M.m.cas_TA	SL4	M.spretus	-12.6618	Unrelated
TA5	M.m.cas_TA	SP1	M.spicilegus	-8.0393	Unrelated
TA5	M.m.cas_TA	SP2	M.spicilegus	-8.80387	Unrelated
TA5	M.m.cas_TA	SP3	M.spicilegus	-8.68423	Unrelated
TA5	M.m.cas_TA	SP4	M.spicilegus	-8.56165	Unrelated
TA6	M.m.cas_TA	GE1	M.m.dom_GE	-3.41209	Unrelated
TA6	M.m.cas_TA	GE2	M.m.dom_GE	-3.50911	Unrelated
TA6	M.m.cas_TA	GE3	M.m.dom_GE	-3.36905	Unrelated
TA6	M.m.cas_TA	GE4	M.m.dom_GE	-3.55591	Unrelated
TA6	M.m.cas_TA	GE5	M.m.dom_GE	-3.46659	Unrelated
TA6	M.m.cas_TA	GE6	M.m.dom_GE	-3.46208	Unrelated
TA6	M.m.cas_TA	GE7	M.m.dom_GE	-3.43531	Unrelated
TA6	M.m.cas_TA	GE8	M.m.dom_GE	-3.44821	Unrelated
TA6	M.m.cas_TA	FR1	M.m.dom_FR	-3.18851	Unrelated
TA6	M.m.cas_TA	FR2	M.m.dom_FR	-3.37003	Unrelated
TA6	M.m.cas_TA	FR3	M.m.dom_FR	-3.3303	Unrelated
TA6	M.m.cas_TA	FR4	M.m.dom_FR	-3.33713	Unrelated
TA6	M.m.cas_TA	FR5	M.m.dom_FR	-3.12374	Unrelated
TA6	M.m.cas_TA	FR6	M.m.dom_FR	-3.28025	Unrelated
TA6	M.m.cas_TA	FR7	M.m.dom_FR	-3.28943	Unrelated
TA6	M.m.cas_TA	FR8	M.m.dom_FR	-3.45184	Unrelated
TA6	M.m.cas_TA	IR1	M.m.dom_IR	-2.86325	Unrelated
TA6	M.m.cas_TA	IR2	M.m.dom_IR	-2.7675	Unrelated
TA6	M.m.cas_TA	IR3	M.m.dom_IR	-2.97256	Unrelated
TA6	M.m.cas_TA	IR4	M.m.dom_IR	-2.77346	Unrelated
TA6	M.m.cas_TA	IR5	M.m.dom_IR	-2.63905	Unrelated
TA6	M.m.cas_TA	IR6	M.m.dom_IR	-3.05739	Unrelated
TA6	M.m.cas_TA	IR7	M.m.dom_IR	-2.83835	Unrelated
TA6	M.m.cas_TA	IR8	M.m.dom_IR	-3.02232	Unrelated
TA6	M.m.cas_TA	KA1	M.m.mus_KA	-2.91591	Unrelated
TA6	M.m.cas_TA	KA2	M.m.mus_KA	-3.1059	Unrelated
TA6	M.m.cas_TA	KA3	M.m.mus_KA	-2.9226	Unrelated
TA6	M.m.cas_TA	KA4	M.m.mus_KA	-2.91082	Unrelated
TA6	M.m.cas_TA	KA5	M.m.mus_KA	-3.02408	Unrelated
TA6	M.m.cas_TA	KA6	M.m.mus_KA	-3.0146	Unrelated
TA6	M.m.cas_TA	KA7	M.m.mus_KA	-2.88939	Unrelated
TA6	M.m.cas_TA	KA8	M.m.mus_KA	-2.9337	Unrelated
TA6	M.m.cas_TA	TA1	M.m.cas_TA	-0.273483	Unrelated
TA6	M.m.cas_TA	TA2	M.m.cas_TA	-0.208703	Unrelated
TA6	M.m.cas_TA	TA3	M.m.cas_TA	-0.372689	Unrelated
TA6	M.m.cas_TA	TA4	M.m.cas_TA	-0.141667	Unrelated
TA6	M.m.cas_TA	TA5	M.m.cas_TA	-0.146822	Unrelated
TA6	M.m.cas_TA	TA7	M.m.cas_TA	-0.252281	Unrelated
TA6	M.m.cas_TA	TA8	M.m.cas_TA	-0.337102	Unrelated
TA6	M.m.cas_TA	SL1	M.spretus	-13.8486	Unrelated
TA6	M.m.cas_TA	SL2	M.spretus	-13.3847	Unrelated
TA6	M.m.cas_TA	SL3	M.spretus	-13.7071	Unrelated
TA6	M.m.cas_TA	SL4	M.spretus	-13.5009	Unrelated
TA6	M.m.cas_TA	SP1	M.spicilegus	-8.38185	Unrelated
TA6	M.m.cas_TA	SP2	M.spicilegus	-9.20774	Unrelated
TA6	M.m.cas_TA	SP3	M.spicilegus	-9.07794	Unrelated
TA6	M.m.cas_TA	SP4	M.spicilegus	-8.94695	Unrelated
TA7	M.m.cas_TA	GE1	M.m.dom_GE	-3.54031	Unrelated
TA7	M.m.cas_TA	GE2	M.m.dom_GE	-3.66694	Unrelated
TA7	M.m.cas_TA	GE3	M.m.dom_GE	-3.50902	Unrelated
TA7	M.m.cas_TA	GE4	M.m.dom_GE	-3.69637	Unrelated
TA7	M.m.cas_TA	GE5	M.m.dom_GE	-3.59836	Unrelated
TA7	M.m.cas_TA	GE6	M.m.dom_GE	-3.59943	Unrelated
TA7	M.m.cas_TA	GE7	M.m.dom_GE	-3.5698	Unrelated
TA7	M.m.cas_TA	GE8	M.m.dom_GE	-3.57778	Unrelated
TA7	M.m.cas_TA	FR1	M.m.dom_FR	-3.31033	Unrelated
TA7	M.m.cas_TA	FR2	M.m.dom_FR	-3.51177	Unrelated
TA7	M.m.cas_TA	FR3	M.m.dom_FR	-3.47881	Unrelated
TA7	M.m.cas_TA	FR4	M.m.dom_FR	-3.47621	Unrelated
TA7	M.m.cas_TA	FR5	M.m.dom_FR	-3.25122	Unrelated
TA7	M.m.cas_TA	FR6	M.m.dom_FR	-3.41602	Unrelated
TA7	M.m.cas_TA	FR7	M.m.dom_FR	-3.41877	Unrelated
TA7	M.m.cas_TA	FR8	M.m.dom_FR	-3.5937	Unrelated
TA7	M.m.cas_TA	IR1	M.m.dom_IR	-2.96294	Unrelated
TA7	M.m.cas_TA	IR2	M.m.dom_IR	-2.86597	Unrelated
TA7	M.m.cas_TA	IR3	M.m.dom_IR	-3.08989	Unrelated
TA7	M.m.cas_TA	IR4	M.m.dom_IR	-2.87022	Unrelated
TA7	M.m.cas_TA	IR5	M.m.dom_IR	-2.73232	Unrelated
TA7	M.m.cas_TA	IR6	M.m.dom_IR	-3.17833	Unrelated
TA7	M.m.cas_TA	IR7	M.m.dom_IR	-2.94199	Unrelated
TA7	M.m.cas_TA	IR8	M.m.dom_IR	-3.13923	Unrelated
TA7	M.m.cas_TA	KA1	M.m.mus_KA	-3.01445	Unrelated
TA7	M.m.cas_TA	KA2	M.m.mus_KA	-3.22786	Unrelated
TA7	M.m.cas_TA	KA3	M.m.mus_KA	-3.02693	Unrelated
TA7	M.m.cas_TA	KA4	M.m.mus_KA	-3.01832	Unrelated
TA7	M.m.cas_TA	KA5	M.m.mus_KA	-3.13318	Unrelated
TA7	M.m.cas_TA	KA6	M.m.mus_KA	-3.13148	Unrelated
TA7	M.m.cas_TA	KA7	M.m.mus_KA	-2.97859	Unrelated
TA7	M.m.cas_TA	KA8	M.m.mus_KA	-3.0469	Unrelated
TA7	M.m.cas_TA	TA1	M.m.cas_TA	-0.135394	Unrelated
TA7	M.m.cas_TA	TA2	M.m.cas_TA	-0.320638	Unrelated
TA7	M.m.cas_TA	TA3	M.m.cas_TA	-0.296345	Unrelated
TA7	M.m.cas_TA	TA4	M.m.cas_TA	-0.369971	Unrelated
TA7	M.m.cas_TA	TA5	M.m.cas_TA	-0.080639	Unrelated
TA7	M.m.cas_TA	TA6	M.m.cas_TA	-0.252281	Unrelated
TA7	M.m.cas_TA	TA8	M.m.cas_TA	-0.340939	Unrelated
TA7	M.m.cas_TA	SL1	M.spretus	-14.8235	Unrelated
TA7	M.m.cas_TA	SL2	M.spretus	-14.3253	Unrelated
TA7	M.m.cas_TA	SL3	M.spretus	-14.6768	Unrelated
TA7	M.m.cas_TA	SL4	M.spretus	-14.4366	Unrelated
TA7	M.m.cas_TA	SP1	M.spicilegus	-8.71576	Unrelated
TA7	M.m.cas_TA	SP2	M.spicilegus	-9.60807	Unrelated
TA7	M.m.cas_TA	SP3	M.spicilegus	-9.46419	Unrelated
TA7	M.m.cas_TA	SP4	M.spicilegus	-9.32269	Unrelated
TA8	M.m.cas_TA	GE1	M.m.dom_GE	-3.83384	Unrelated
TA8	M.m.cas_TA	GE2	M.m.dom_GE	-3.96147	Unrelated
TA8	M.m.cas_TA	GE3	M.m.dom_GE	-3.79721	Unrelated
TA8	M.m.cas_TA	GE4	M.m.dom_GE	-4.02416	Unrelated
TA8	M.m.cas_TA	GE5	M.m.dom_GE	-3.90921	Unrelated
TA8	M.m.cas_TA	GE6	M.m.dom_GE	-3.90155	Unrelated
TA8	M.m.cas_TA	GE7	M.m.dom_GE	-3.86962	Unrelated
TA8	M.m.cas_TA	GE8	M.m.dom_GE	-3.88986	Unrelated
TA8	M.m.cas_TA	FR1	M.m.dom_FR	-3.56867	Unrelated
TA8	M.m.cas_TA	FR2	M.m.dom_FR	-3.79528	Unrelated
TA8	M.m.cas_TA	FR3	M.m.dom_FR	-3.75669	Unrelated
TA8	M.m.cas_TA	FR4	M.m.dom_FR	-3.75596	Unrelated
TA8	M.m.cas_TA	FR5	M.m.dom_FR	-3.49684	Unrelated
TA8	M.m.cas_TA	FR6	M.m.dom_FR	-3.6848	Unrelated
TA8	M.m.cas_TA	FR7	M.m.dom_FR	-3.69092	Unrelated
TA8	M.m.cas_TA	FR8	M.m.dom_FR	-3.88135	Unrelated
TA8	M.m.cas_TA	IR1	M.m.dom_IR	-3.18262	Unrelated
TA8	M.m.cas_TA	IR2	M.m.dom_IR	-3.06787	Unrelated
TA8	M.m.cas_TA	IR3	M.m.dom_IR	-3.30793	Unrelated
TA8	M.m.cas_TA	IR4	M.m.dom_IR	-3.08014	Unrelated
TA8	M.m.cas_TA	IR5	M.m.dom_IR	-2.91919	Unrelated
TA8	M.m.cas_TA	IR6	M.m.dom_IR	-3.42154	Unrelated
TA8	M.m.cas_TA	IR7	M.m.dom_IR	-3.14785	Unrelated
TA8	M.m.cas_TA	IR8	M.m.dom_IR	-3.35771	Unrelated
TA8	M.m.cas_TA	KA1	M.m.mus_KA	-3.2629	Unrelated
TA8	M.m.cas_TA	KA2	M.m.mus_KA	-3.49256	Unrelated
TA8	M.m.cas_TA	KA3	M.m.mus_KA	-3.25	Unrelated
TA8	M.m.cas_TA	KA4	M.m.mus_KA	-3.25688	Unrelated
TA8	M.m.cas_TA	KA5	M.m.mus_KA	-3.38543	Unrelated
TA8	M.m.cas_TA	KA6	M.m.mus_KA	-3.38722	Unrelated
TA8	M.m.cas_TA	KA7	M.m.mus_KA	-3.21843	Unrelated
TA8	M.m.cas_TA	KA8	M.m.mus_KA	-3.26487	Unrelated
TA8	M.m.cas_TA	TA1	M.m.cas_TA	-0.425139	Unrelated
TA8	M.m.cas_TA	TA2	M.m.cas_TA	-0.501647	Unrelated
TA8	M.m.cas_TA	TA3	M.m.cas_TA	-0.212816	Unrelated
TA8	M.m.cas_TA	TA4	M.m.cas_TA	-0.37928	Unrelated
TA8	M.m.cas_TA	TA5	M.m.cas_TA	-0.184295	Unrelated
TA8	M.m.cas_TA	TA6	M.m.cas_TA	-0.337102	Unrelated
TA8	M.m.cas_TA	TA7	M.m.cas_TA	-0.340939	Unrelated
TA8	M.m.cas_TA	SL1	M.spretus	-16.3192	Unrelated
TA8	M.m.cas_TA	SL2	M.spretus	-15.7148	Unrelated
TA8	M.m.cas_TA	SL3	M.spretus	-16.1404	Unrelated
TA8	M.m.cas_TA	SL4	M.spretus	-15.8693	Unrelated
TA8	M.m.cas_TA	SP1	M.spicilegus	-9.22554	Unrelated
TA8	M.m.cas_TA	SP2	M.spicilegus	-10.2046	Unrelated
TA8	M.m.cas_TA	SP3	M.spicilegus	-10.0504	Unrelated
TA8	M.m.cas_TA	SP4	M.spicilegus	-9.89601	Unrelated
SL1	M.spretus	GE1	M.m.dom_GE	-13.8481	Unrelated
SL1	M.spretus	GE2	M.m.dom_GE	-14.2772	Unrelated
SL1	M.spretus	GE3	M.m.dom_GE	-13.54	Unrelated
SL1	M.spretus	GE4	M.m.dom_GE	-14.6792	Unrelated
SL1	M.spretus	GE5	M.m.dom_GE	-14.069	Unrelated
SL1	M.spretus	GE6	M.m.dom_GE	-13.9607	Unrelated
SL1	M.spretus	GE7	M.m.dom_GE	-13.85	Unrelated
SL1	M.spretus	GE8	M.m.dom_GE	-14.0753	Unrelated
SL1	M.spretus	FR1	M.m.dom_FR	-12.5591	Unrelated
SL1	M.spretus	FR2	M.m.dom_FR	-13.431	Unrelated
SL1	M.spretus	FR3	M.m.dom_FR	-13.3148	Unrelated
SL1	M.spretus	FR4	M.m.dom_FR	-13.3722	Unrelated
SL1	M.spretus	FR5	M.m.dom_FR	-12.2535	Unrelated
SL1	M.spretus	FR6	M.m.dom_FR	-13.0057	Unrelated
SL1	M.spretus	FR7	M.m.dom_FR	-12.9153	Unrelated
SL1	M.spretus	FR8	M.m.dom_FR	-13.7683	Unrelated
SL1	M.spretus	IR1	M.m.dom_IR	-11.0204	Unrelated
SL1	M.spretus	IR2	M.m.dom_IR	-10.4767	Unrelated
SL1	M.spretus	IR3	M.m.dom_IR	-11.5428	Unrelated
SL1	M.spretus	IR4	M.m.dom_IR	-10.6565	Unrelated
SL1	M.spretus	IR5	M.m.dom_IR	-10.0441	Unrelated
SL1	M.spretus	IR6	M.m.dom_IR	-11.9531	Unrelated
SL1	M.spretus	IR7	M.m.dom_IR	-10.867	Unrelated
SL1	M.spretus	IR8	M.m.dom_IR	-11.6344	Unrelated
SL1	M.spretus	KA1	M.m.mus_KA	-12.1379	Unrelated
SL1	M.spretus	KA2	M.m.mus_KA	-13.1711	Unrelated
SL1	M.spretus	KA3	M.m.mus_KA	-12.0558	Unrelated
SL1	M.spretus	KA4	M.m.mus_KA	-12.0035	Unrelated
SL1	M.spretus	KA5	M.m.mus_KA	-12.7287	Unrelated
SL1	M.spretus	KA6	M.m.mus_KA	-12.6048	Unrelated
SL1	M.spretus	KA7	M.m.mus_KA	-11.9476	Unrelated
SL1	M.spretus	KA8	M.m.mus_KA	-12.1261	Unrelated
SL1	M.spretus	TA1	M.m.cas_TA	-16.0073	Unrelated
SL1	M.spretus	TA2	M.m.cas_TA	-16.4442	Unrelated
SL1	M.spretus	TA3	M.m.cas_TA	-16.2782	Unrelated
SL1	M.spretus	TA4	M.m.cas_TA	-14.7906	Unrelated
SL1	M.spretus	TA5	M.m.cas_TA	-12.9902	Unrelated
SL1	M.spretus	TA6	M.m.cas_TA	-13.8486	Unrelated
SL1	M.spretus	TA7	M.m.cas_TA	-14.8235	Unrelated
SL1	M.spretus	TA8	M.m.cas_TA	-16.3192	Unrelated
SL1	M.spretus	SL2	M.spretus	-1.16628	Unrelated
SL1	M.spretus	SL3	M.spretus	-1.2824	Unrelated
SL1	M.spretus	SL4	M.spretus	-1.20878	Unrelated
SL1	M.spretus	SP1	M.spicilegus	-11.9305	Unrelated
SL1	M.spretus	SP2	M.spicilegus	-13.6258	Unrelated
SL1	M.spretus	SP3	M.spicilegus	-13.3738	Unrelated
SL1	M.spretus	SP4	M.spicilegus	-13.0386	Unrelated
SL2	M.spretus	GE1	M.m.dom_GE	-13.3699	Unrelated
SL2	M.spretus	GE2	M.m.dom_GE	-13.7832	Unrelated
SL2	M.spretus	GE3	M.m.dom_GE	-13.0825	Unrelated
SL2	M.spretus	GE4	M.m.dom_GE	-14.1605	Unrelated
SL2	M.spretus	GE5	M.m.dom_GE	-13.5723	Unrelated
SL2	M.spretus	GE6	M.m.dom_GE	-13.4733	Unrelated
SL2	M.spretus	GE7	M.m.dom_GE	-13.3933	Unrelated
SL2	M.spretus	GE8	M.m.dom_GE	-13.5908	Unrelated
SL2	M.spretus	FR1	M.m.dom_FR	-12.1461	Unrelated
SL2	M.spretus	FR2	M.m.dom_FR	-12.9662	Unrelated
SL2	M.spretus	FR3	M.m.dom_FR	-12.869	Unrelated
SL2	M.spretus	FR4	M.m.dom_FR	-12.9103	Unrelated
SL2	M.spretus	FR5	M.m.dom_FR	-11.8554	Unrelated
SL2	M.spretus	FR6	M.m.dom_FR	-12.5703	Unrelated
SL2	M.spretus	FR7	M.m.dom_FR	-12.4785	Unrelated
SL2	M.spretus	FR8	M.m.dom_FR	-13.298	Unrelated
SL2	M.spretus	IR1	M.m.dom_IR	-10.6889	Unrelated
SL2	M.spretus	IR2	M.m.dom_IR	-10.1649	Unrelated
SL2	M.spretus	IR3	M.m.dom_IR	-11.1797	Unrelated
SL2	M.spretus	IR4	M.m.dom_IR	-10.3341	Unrelated
SL2	M.spretus	IR5	M.m.dom_IR	-9.74737	Unrelated
SL2	M.spretus	IR6	M.m.dom_IR	-11.5842	Unrelated
SL2	M.spretus	IR7	M.m.dom_IR	-10.5378	Unrelated
SL2	M.spretus	IR8	M.m.dom_IR	-11.2714	Unrelated
SL2	M.spretus	KA1	M.m.mus_KA	-11.7714	Unrelated
SL2	M.spretus	KA2	M.m.mus_KA	-12.7639	Unrelated
SL2	M.spretus	KA3	M.m.mus_KA	-11.6798	Unrelated
SL2	M.spretus	KA4	M.m.mus_KA	-11.6387	Unrelated
SL2	M.spretus	KA5	M.m.mus_KA	-12.3285	Unrelated
SL2	M.spretus	KA6	M.m.mus_KA	-12.214	Unrelated
SL2	M.spretus	KA7	M.m.mus_KA	-11.5835	Unrelated
SL2	M.spretus	KA8	M.m.mus_KA	-11.7464	Unrelated
SL2	M.spretus	TA1	M.m.cas_TA	-15.416	Unrelated
SL2	M.spretus	TA2	M.m.cas_TA	-15.8577	Unrelated
SL2	M.spretus	TA3	M.m.cas_TA	-15.6987	Unrelated
SL2	M.spretus	TA4	M.m.cas_TA	-14.3	Unrelated
SL2	M.spretus	TA5	M.m.cas_TA	-12.5594	Unrelated
SL2	M.spretus	TA6	M.m.cas_TA	-13.3847	Unrelated
SL2	M.spretus	TA7	M.m.cas_TA	-14.3253	Unrelated
SL2	M.spretus	TA8	M.m.cas_TA	-15.7148	Unrelated
SL2	M.spretus	SL1	M.spretus	-1.16628	Unrelated
SL2	M.spretus	SL3	M.spretus	-0.974239	Unrelated
SL2	M.spretus	SL4	M.spretus	-0.9124	Unrelated
SL2	M.spretus	SP1	M.spicilegus	-11.5956	Unrelated
SL2	M.spretus	SP2	M.spicilegus	-13.2461	Unrelated
SL2	M.spretus	SP3	M.spicilegus	-12.9978	Unrelated
SL2	M.spretus	SP4	M.spicilegus	-12.6723	Unrelated
SL3	M.spretus	GE1	M.m.dom_GE	-13.7016	Unrelated
SL3	M.spretus	GE2	M.m.dom_GE	-14.1284	Unrelated
SL3	M.spretus	GE3	M.m.dom_GE	-13.4081	Unrelated
SL3	M.spretus	GE4	M.m.dom_GE	-14.5264	Unrelated
SL3	M.spretus	GE5	M.m.dom_GE	-13.9066	Unrelated
SL3	M.spretus	GE6	M.m.dom_GE	-13.8027	Unrelated
SL3	M.spretus	GE7	M.m.dom_GE	-13.7133	Unrelated
SL3	M.spretus	GE8	M.m.dom_GE	-13.9222	Unrelated
SL3	M.spretus	FR1	M.m.dom_FR	-12.4294	Unrelated
SL3	M.spretus	FR2	M.m.dom_FR	-13.2825	Unrelated
SL3	M.spretus	FR3	M.m.dom_FR	-13.1777	Unrelated
SL3	M.spretus	FR4	M.m.dom_FR	-13.2203	Unrelated
SL3	M.spretus	FR5	M.m.dom_FR	-12.1254	Unrelated
SL3	M.spretus	FR6	M.m.dom_FR	-12.8644	Unrelated
SL3	M.spretus	FR7	M.m.dom_FR	-12.7694	Unrelated
SL3	M.spretus	FR8	M.m.dom_FR	-13.626	Unrelated
SL3	M.spretus	IR1	M.m.dom_IR	-10.9084	Unrelated
SL3	M.spretus	IR2	M.m.dom_IR	-10.363	Unrelated
SL3	M.spretus	IR3	M.m.dom_IR	-11.4151	Unrelated
SL3	M.spretus	IR4	M.m.dom_IR	-10.542	Unrelated
SL3	M.spretus	IR5	M.m.dom_IR	-9.94296	Unrelated
SL3	M.spretus	IR6	M.m.dom_IR	-11.8346	Unrelated
SL3	M.spretus	IR7	M.m.dom_IR	-10.756	Unrelated
SL3	M.spretus	IR8	M.m.dom_IR	-11.5074	Unrelated
[truncated: 258 more rows]
