# Supplementary material for: Full-length RNA transcript sequencing traces brain isoform diversity in house mouse natural populations
Source: HighWire-hosted journal article supplement (doi:10.1101/gr.279166.124), 2024-09-17
Supplement: Supplemental_Data_S2.xlsx [file Supplemental_Data_S2.xlsx]

## Sheet: Data S2
Supplemental Data S2 List of high-confidence isoforms generated in this study. The presence of an isoforms was defined as supporting with at least 2 FLNC reads in a given individual. TSS:Transcription start site; TTS: Transcription termination site; SJ: splice junction. For SJ, "full support" means all the splice junctions of the focal transcripts are supported, while "partial_support" means at l…
Isoform_ID	Chrom	Strand	Length	Exon number	Structural_category	Associated_gene	Associated_transcript	Ref_length	Ref_exons	Coding_Status	ORF_length	CDS_length	CDS_start	CDS_end	CDS_genomic_start	CDS_genomic_end	predicted_NMD	TSS_Support	TTS_Support	SJ_Support	Number of occurrence	# Isoforms for gene locus	Average expression level(TPM)	Fraction of gene expression	Top expressed isoform?	FL.GE1	FL.GE2	FL.GE3	FL.GE4	FL.GE5	FL.GE6	FL.GE7	FL.GE8	FL.FR1	FL.FR2	FL.FR3	FL.FR4	FL.FR5	FL.FR6	FL.FR7	FL.FR8	FL.IR1	FL.IR2	FL.IR3	FL.IR4	FL.IR5	FL.IR6	FL.IR7	FL.IR8
G10006.1	14	+	2922	10	full-splice_match	ENSMUSG00000021962	ENSMUST00000022535	5576	10	coding	582	1749	56	1804	30201639	30245263	FALSE	TRUE	FALSE	Full	2	1	3.33804	1	T	0	0	2	0	0	0	0	0	2	0	0	0	0	0	0	0	0	0	0	0	0	0	0	0
G10008.12	14	+	1616	12	novel_not_in_catalog	ENSMUSG00000021957	novel	1619	13	coding	461	1386	129	1514	30271231	30295469	FALSE	TRUE	TRUE	Full	1	18	3.01633	0.00592808	F	0	0	0	0	0	0	0	0	0	0	0	0	0	0	0	0	0	0	0	0	0	0	0	0
G10008.13	14	+	2189	13	novel_in_catalog	ENSMUSG00000021957	novel	3223	14	coding	653	1962	127	2088	30271231	30295469	FALSE	TRUE	TRUE	Full	1	18	3.1627	0.00621576	F	0	0	2	0	0	0	0	0	0	0	0	0	0	0	0	0	0	0	0	0	0	0	0	0
G10008.14	14	+	3170	14	full-splice_match	ENSMUSG00000021957	ENSMUST00000022529	3223	14	coding	623	1872	108	1979	30271231	30295469	FALSE	TRUE	TRUE	Full	25	18	6.41623	0.01261	F	6	8	2	0	0	0	0	0	2	2	5	0	0	0	0	0	2	2	0	5	2	3	5	0
G10008.15	14	+	2695	13	novel_in_catalog	ENSMUSG00000021957	novel	3223	14	coding	399	1200	106	1305	30271231	30290572	TRUE	TRUE	TRUE	Full	7	18	3.59266	0.00706076	F	0	0	2	2	0	0	0	2	0	0	0	0	0	0	0	0	0	0	0	0	3	0	0	2
G10008.16	14	+	2065	14	full-splice_match	ENSMUSG00000021957	ENSMUST00000022529	3223	14	coding	623	1872	93	1964	30271231	30295469	FALSE	TRUE	TRUE	Full	48	18	438.736	0.862261	T	274	407	270	319	149	250	149	188	266	208	238	194	138	273	232	79	425	431	130	428	432	474	533	287
G10008.17	14	+	1867	13	incomplete-splice_match	ENSMUSG00000021957	ENSMUST00000225857	1962	14	coding	576	1731	36	1766	30280712	30295469	FALSE	TRUE	TRUE	Full	6	18	3.7309	0.00733247	F	0	0	0	0	0	0	0	2	0	0	0	0	0	0	0	0	3	2	0	2	0	0	0	0
G10008.18	14	+	1810	12	incomplete-splice_match	ENSMUSG00000021957	ENSMUST00000225857	1962	14	coding	489	1470	240	1709	30282607	30295469	FALSE	TRUE	TRUE	Full	23	18	5.71548	0.0112328	F	0	0	0	3	4	0	0	2	7	4	2	3	0	0	2	0	0	0	3	4	0	2	0	6
G10008.21	14	+	1530	10	incomplete-splice_match	ENSMUSG00000021957	ENSMUST00000225857	1962	14	coding	472	1419	11	1429	30287461	30295469	FALSE	TRUE	TRUE	Full	16	18	4.7064	0.00924965	F	0	0	0	0	6	4	2	2	0	2	2	2	0	2	0	0	5	3	3	2	0	4	0	0
G10008.22	14	+	1345	9	incomplete-splice_match	ENSMUSG00000021957	ENSMUST00000225857	1962	14	coding	358	1077	168	1244	30290168	30295469	FALSE	TRUE	TRUE	Full	5	18	3.94715	0.00775746	F	0	0	0	0	0	0	0	0	0	0	0	0	0	0	0	0	0	0	0	0	0	0	2	0
G10008.23	14	+	1229	8	full-splice_match	ENSMUSG00000021957	ENSMUST00000225039	1401	8	coding	358	1077	52	1128	30290168	30295469	FALSE	TRUE	TRUE	Full	14	18	5.06287	0.00995023	F	0	0	0	0	0	0	0	2	0	0	0	0	2	0	0	4	4	0	3	0	5	2	0	0
G10008.24	14	+	1033	7	incomplete-splice_match	ENSMUSG00000021957	ENSMUST00000225039	1401	8	coding	255	768	165	932	30291094	30295469	FALSE	TRUE	TRUE	Full	3	18	3.06987	0.00603331	F	0	0	0	0	0	0	0	0	0	0	0	0	0	0	0	0	0	0	2	0	2	0	0	0
G10008.25	14	+	832	6	incomplete-splice_match	ENSMUSG00000021957	ENSMUST00000225039	1401	8	coding	222	669	63	731	30292009	30295469	FALSE	TRUE	TRUE	Full	2	18	5.0968	0.0100169	F	0	0	0	0	0	0	0	4	0	0	0	0	0	0	0	0	0	0	2	0	0	0	0	0
G10008.26	14	+	709	5	incomplete-splice_match	ENSMUSG00000021957	ENSMUST00000225039	1401	8	coding	195	588	21	608	30292180	30295469	FALSE	TRUE	TRUE	Full	3	18	3.39271	0.00666779	F	0	0	0	0	0	0	0	2	0	0	0	0	0	0	0	0	0	0	0	0	0	0	0	0
G10008.27	14	+	578	4	incomplete-splice_match	ENSMUSG00000021957	ENSMUST00000225039	1401	8	coding	20	63	415	477	30295407	30295469	FALSE	TRUE	TRUE	Full	2	18	4.36571	0.00858007	F	0	0	0	0	0	0	0	0	0	0	0	0	0	0	0	0	0	0	0	4	0	0	0	0
G10008.28	14	+	496	3	incomplete-splice_match	ENSMUSG00000021957	ENSMUST00000225039	1401	8	coding	20	63	333	395	30295407	30295469	FALSE	TRUE	TRUE	Full	2	18	3.47705	0.00683355	F	0	0	0	0	2	0	0	0	0	0	2	0	0	0	0	0	0	0	0	0	0	0	0	0
G10008.5	14	+	2177	15	novel_not_in_catalog	ENSMUSG00000021957	novel	3223	14	coding	623	1872	205	2076	30271231	30295469	FALSE	TRUE	TRUE	Full	1	18	3.06646	0.00602661	F	0	0	0	0	0	0	0	0	0	0	0	0	0	0	0	0	0	0	0	0	0	2	0	0
G10008.6	14	+	2274	15	novel_not_in_catalog	ENSMUSG00000021957	novel	3223	14	coding	623	1872	305	2176	30271231	30295469	FALSE	TRUE	TRUE	Full	1	18	3.51337	0.00690494	F	0	0	0	0	0	0	0	0	2	0	0	0	0	0	0	0	0	0	0	0	0	0	0	0
G10008.7	14	+	2495	15	novel_in_catalog	ENSMUSG00000021957	novel	3223	14	coding	623	1872	523	2394	30271231	30295469	FALSE	TRUE	TRUE	Full	3	18	4.7517	0.00933868	F	2	4	3	0	0	0	0	0	0	0	0	0	0	0	0	0	0	0	0	0	0	0	0	0
G10009.10	14	-	2853	18	full-splice_match	ENSMUSG00000021948	ENSMUST00000112211	2851	18	coding	700	2103	240	2342	30332259	30317824	FALSE	TRUE	TRUE	Full	21	13	5.01915	0.0458105	F	4	3	2	2	0	0	2	0	0	0	4	0	0	5	4	0	0	0	0	3	3	0	0	0
G10009.11	14	-	2786	18	novel_not_in_catalog	ENSMUSG00000021948	novel	2777	18	coding	559	1680	596	2275	30329595	30317824	FALSE	TRUE	TRUE	Full	1	13	2.95845	0.0270022	F	0	0	0	0	0	0	0	0	0	0	0	0	0	0	0	0	0	0	0	0	0	0	0	0
G10009.14	14	-	2775	18	full-splice_match	ENSMUSG00000021948	ENSMUST00000112210	2777	18	coding	674	2025	240	2264	30332259	30317824	FALSE	TRUE	TRUE	Full	48	13	59.7969	0.545775	T	80	87	57	88	14	41	18	8	64	49	73	41	25	43	49	4	14	18	5	22	18	2	9	11
G10009.15	14	-	3021	17	novel_in_catalog	ENSMUSG00000021948	novel	2777	18	coding	446	1341	1170	2510	30327499	30317824	FALSE	TRUE	TRUE	Full	1	13	3.38255	0.030873	F	0	0	0	0	0	2	0	0	0	0	0	0	0	0	0	0	0	0	0	0	0	0	0	0
G10009.16	14	-	3038	17	novel_not_in_catalog	ENSMUSG00000021948	novel	2851	18	coding	375	1128	181	1308	30332259	30324545	TRUE	TRUE	TRUE	Full	1	13	3.4856	0.0318136	F	0	0	0	0	0	0	0	0	0	2	0	0	0	0	0	0	0	0	0	0	0	0	0	0
G10009.17	14	-	3097	17	novel_in_catalog	ENSMUSG00000021948	novel	2851	18	coding	375	1128	240	1367	30332259	30324545	TRUE	TRUE	TRUE	Full	8	13	3.98636	0.0363841	F	0	0	2	0	0	0	0	0	0	0	0	3	0	2	0	0	0	0	0	0	0	0	0	0
G10009.18	14	-	1914	4	full-splice_match	ENSMUSG00000021948	ENSMUST00000140701	1289	4	coding	197	594	810	1403	30321683	30317824	FALSE	FALSE	TRUE	Full	6	13	3.63364	0.0331647	F	0	0	0	0	2	0	0	0	2	0	0	0	0	0	3	0	0	0	0	0	0	0	0	0
G10009.24	14	-	1011	4	full-splice_match	ENSMUSG00000021948	ENSMUST00000140701	1289	4	coding	136	411	137	547	30321397	30317824	FALSE	FALSE	TRUE	Full	1	13	4.6965	0.0428656	F	0	0	0	0	0	0	0	0	0	0	0	0	2	0	0	0	0	0	0	0	0	0	0	0
G10009.25	14	-	2728	18	full-splice_match	ENSMUSG00000021948	ENSMUST00000112210	2777	18	coding	674	2025	240	2264	30332259	30317824	FALSE	TRUE	TRUE	Full	25	13	7.1165	0.0649533	F	2	4	4	4	0	2	2	3	8	3	8	0	0	0	2	0	0	0	0	0	4	0	2	0
G10009.29	14	-	2621	18	full-splice_match	ENSMUSG00000021948	ENSMUST00000112211	2851	18	coding	700	2103	240	2342	30332259	30317824	FALSE	TRUE	TRUE	Full	1	13	3.62379	0.0330748	F	0	0	0	0	0	0	0	0	0	0	0	0	0	0	0	0	0	0	0	0	0	0	0	0
G10009.31	14	-	2541	18	full-splice_match	ENSMUSG00000021948	ENSMUST00000112210	2777	18	coding	674	2025	240	2264	30332259	30317824	FALSE	TRUE	TRUE	Full	29	13	5.4074	0.0493541	F	4	7	3	3	0	3	0	0	4	3	6	3	0	3	2	0	2	3	0	5	3	0	5	2
G10009.5	14	-	759	2	incomplete-splice_match	ENSMUSG00000021948	ENSMUST00000140701	1289	4	non_coding	NA	NA	NA	NA	NA	NA	NA	TRUE	TRUE	Full	1	13	3.1072	0.0283598	F	0	0	0	0	0	0	0	0	0	0	0	0	0	0	0	0	0	0	0	0	0	0	0	0
G10009.6	14	-	947	3	incomplete-splice_match	ENSMUSG00000021948	ENSMUST00000140701	1289	4	coding	136	411	26	436	30321397	30317824	FALSE	TRUE	TRUE	Full	3	13	3.34926	0.0305692	F	0	0	0	0	0	2	0	0	0	0	0	0	0	0	0	0	0	0	0	0	0	0	0	0
G1001.1	1	+	3489	7	full-splice_match	ENSMUSG00000026142	ENSMUST00000027322	3636	7	coding	315	948	132	1079	82318119	82420675	FALSE	TRUE	TRUE	Full	23	1	4.48791	1	T	0	4	5	3	0	2	2	0	2	2	4	4	0	4	0	0	0	0	0	0	0	0	2	2
G10013.2	14	+	4611	22	novel_in_catalog	ENSMUSG00000006527	novel	7837	21	coding	863	2592	384	2975	30488031	30539805	FALSE	TRUE	TRUE	Full	1	3	2.95845	0.264456	F	0	0	0	0	0	0	0	0	0	0	0	0	0	0	0	0	0	0	0	0	0	0	0	0
G10013.3	14	+	3380	21	full-splice_match	ENSMUSG00000006527	ENSMUST00000054230	7837	21	coding	863	2592	292	2883	30488031	30539805	FALSE	TRUE	TRUE	Full	8	3	4.187	0.374276	T	0	2	0	0	0	0	0	0	0	0	0	0	0	0	0	0	0	0	0	0	0	0	0	0
G10013.5	14	+	2153	17	incomplete-splice_match	ENSMUSG00000006527	ENSMUST00000054230	7837	21	coding	632	1896	257	2152	30488031	30533520	FALSE	TRUE	TRUE	Full	9	3	4.04147	0.361268	F	0	0	2	0	0	0	0	0	0	0	0	0	0	0	2	0	0	0	0	2	0	0	0	0
G10017.1	14	+	1323	4	novel_in_catalog	ENSMUSG00000006526	novel	3742	8	coding	173	522	157	678	30547688	30596433	FALSE	TRUE	FALSE	Full	1	8	2.91761	0.093818	F	0	0	0	0	0	0	0	0	0	0	0	0	0	0	0	0	0	0	0	0	0	0	0	0
G10017.2	14	+	1429	6	novel_in_catalog	ENSMUSG00000006526	novel	3742	8	coding	154	465	319	783	30584861	30596433	FALSE	TRUE	FALSE	Full	1	8	3.1627	0.101699	F	0	0	2	0	0	0	0	0	0	0	0	0	0	0	0	0	0	0	0	0	0	0	0	0
G10017.3	14	+	1721	9	full-splice_match	ENSMUSG00000006526	ENSMUST00000227246	3822	9	coding	246	741	336	1076	30584883	30596433	FALSE	TRUE	FALSE	Full	1	8	4.38121	0.140881	F	0	0	0	0	0	0	0	0	0	0	0	0	0	0	0	0	0	0	0	0	0	0	0	2
G10017.4	14	+	1230	8	full-splice_match	ENSMUSG00000006526	ENSMUST00000006701	3742	8	coding	288	867	130	996	30547688	30596433	FALSE	TRUE	FALSE	Full	5	8	3.21032	0.10323	F	0	0	0	0	0	0	0	0	0	0	0	0	0	0	0	0	0	0	0	0	0	0	0	0
G10017.5	14	+	1426	8	full-splice_match	ENSMUSG00000006526	ENSMUST00000006701	3742	8	coding	288	867	121	987	30547688	30596433	FALSE	TRUE	TRUE	Full	12	8	3.48333	0.112009	F	0	2	2	0	0	3	0	0	0	2	0	0	0	0	2	0	0	0	2	0	0	0	2	2
G10017.6	14	+	1632	8	full-splice_match	ENSMUSG00000006526	ENSMUST00000006701	3742	8	coding	288	867	121	987	30547688	30596433	FALSE	TRUE	FALSE	Full	31	8	6.18748	0.198963	T	5	2	0	3	3	2	3	2	3	0	0	0	0	2	0	0	3	0	3	0	2	7	4	0
G10017.7	14	+	1487	6	novel_in_catalog	ENSMUSG00000006526	novel	3742	8	coding	174	525	318	842	30588617	30596433	FALSE	TRUE	FALSE	Full	1	8	3.3374	0.107317	F	0	0	0	0	0	0	0	0	0	0	0	0	0	0	0	0	0	0	0	0	0	0	0	0
G10017.9	14	+	1455	8	full-splice_match	ENSMUSG00000006526	ENSMUST00000006701	3742	8	coding	288	867	102	968	30547688	30596433	FALSE	TRUE	TRUE	Full	18	8	4.41856	0.142082	F	0	0	2	0	2	0	0	4	0	0	0	0	0	0	2	0	5	2	2	0	3	2	3	2
G10020.1	14	+	477	3	full-splice_match	ENSMUSG00000042485	ENSMUST00000040715	1236	3	coding	82	249	66	314	30601564	30602987	FALSE	TRUE	TRUE	Full	31	1	6.49864	1	T	0	0	6	4	0	2	2	7	2	2	0	4	0	3	0	8	0	0	5	0	0	3	2	0
G10021.19	14	-	1051	7	novel_in_catalog	ENSMUSG00000006522	novel	3302	21	coding	275	828	117	944	30635130	30630640	FALSE	TRUE	TRUE	Full	20	5	8.42713	0.389169	T	4	3	5	0	4	3	2	14	3	3	0	0	2	0	0	0	5	5	10	6	6	12	5	0
G10021.3	14	-	468	3	incomplete-splice_match	ENSMUSG00000006522	ENSMUST00000227181	3302	21	coding	89	270	92	361	30631685	30630640	FALSE	TRUE	TRUE	Full	2	5	3.69403	0.170592	F	0	0	0	0	0	0	0	0	0	0	0	0	0	0	0	0	0	0	0	0	0	0	0	0
G10021.31	14	-	1425	6	novel_in_catalog	ENSMUSG00000006522	novel	3302	21	coding	172	519	800	1318	30633985	30630640	FALSE	TRUE	TRUE	Full	2	5	3.12991	0.144541	F	0	2	2	0	0	0	0	0	0	0	0	0	0	0	0	0	0	0	0	0	0	0	0	0
G10021.33	14	-	1638	6	novel_in_catalog	ENSMUSG00000006522	novel	3302	21	coding	172	519	1013	1531	30633985	30630640	FALSE	TRUE	TRUE	Full	1	5	3.17608	0.146673	F	0	0	0	0	0	0	0	0	0	0	0	0	0	0	0	0	0	0	2	0	0	0	0	0
G10021.7	14	-	1006	8	incomplete-splice_match	ENSMUSG00000006522	ENSMUST00000227181	3302	21	coding	260	783	117	899	30635130	30630640	FALSE	TRUE	TRUE	Full	3	5	3.22699	0.149024	F	0	2	0	0	0	0	0	2	0	0	0	0	0	0	0	0	0	0	0	0	2	0	0	0
G10022.1	14	+	1471	5	full-splice_match	ENSMUSG00000021918	ENSMUST00000226833	1252	5	coding	274	825	195	1019	30673583	30681256	FALSE	TRUE	TRUE	Full	3	14	3.24729	0.0625328	F	0	0	0	0	0	0	0	0	0	0	0	0	0	0	0	0	0	0	0	0	0	0	0	0
G10022.10	14	+	4644	15	full-splice_match	ENSMUSG00000021918	ENSMUST00000228328	4245	15	coding	792	2379	166	2544	30673583	30709161	FALSE	TRUE	TRUE	Full	1	14	3.31681	0.0638715	F	2	0	0	0	0	0	0	0	0	0	0	0	0	0	0	0	0	0	0	0	0	0	0	0
G10022.17	14	+	2635	14	full-splice_match	ENSMUSG00000021918	ENSMUST00000226551	4098	14	coding	744	2235	166	2400	30673583	30709161	FALSE	TRUE	TRUE	Full	1	14	3.38255	0.0651374	F	0	0	0	0	0	2	0	0	0	0	0	0	0	0	0	0	0	0	0	0	0	0	0	0
G10022.18	14	+	2908	14	full-splice_match	ENSMUSG00000021918	ENSMUST00000226551	4098	14	coding	744	2235	166	2400	30673583	30709161	FALSE	TRUE	TRUE	Full	2	14	3.19973	0.0616169	F	0	0	0	0	0	0	0	0	0	0	0	0	0	0	0	0	0	0	0	0	2	0	0	0
G10022.19	14	+	3113	14	full-splice_match	ENSMUSG00000021918	ENSMUST00000226551	4098	14	coding	744	2235	166	2400	30673583	30709161	FALSE	TRUE	FALSE	Full	5	14	4.83965	0.0931967	T	0	2	0	0	0	0	0	0	0	2	0	4	0	4	0	0	0	3	0	0	0	0	0	0
G10022.2	14	+	1285	5	full-splice_match	ENSMUSG00000021918	ENSMUST00000226833	1252	5	coding	274	825	186	1010	30673583	30681256	FALSE	TRUE	TRUE	Full	2	14	3.08611	0.0594289	F	0	2	0	0	0	0	0	0	0	0	0	0	0	0	0	0	0	0	0	0	2	0	0	0
G10022.20	14	+	3670	14	full-splice_match	ENSMUSG00000021918	ENSMUST00000226551	4098	14	coding	744	2235	166	2400	30673583	30709161	FALSE	TRUE	TRUE	Full	14	14	4.75972	0.0916574	F	3	2	3	2	2	0	0	0	5	5	0	3	0	3	4	0	2	0	0	3	0	0	2	0
G10022.21	14	+	4015	14	full-splice_match	ENSMUSG00000021918	ENSMUST00000226551	4098	14	coding	744	2235	166	2400	30673583	30709161	FALSE	TRUE	TRUE	Full	11	14	3.58216	0.0689813	F	0	0	2	3	2	3	2	0	0	2	2	0	0	2	0	0	0	0	0	0	0	0	2	0
G10022.22	14	+	4500	14	full-splice_match	ENSMUSG00000021918	ENSMUST00000226551	4098	14	coding	744	2235	166	2400	30673583	30709161	FALSE	TRUE	TRUE	Full	1	14	3.1627	0.0609038	F	0	0	2	0	0	0	0	0	0	0	0	0	0	0	0	0	0	0	0	0	0	0	0	0
G10022.3	14	+	3426	14	full-splice_match	ENSMUSG00000021918	ENSMUST00000226551	4098	14	coding	744	2235	169	2403	30673583	30709161	FALSE	TRUE	TRUE	Full	1	14	2.79612	0.0538447	F	0	0	0	0	0	0	0	0	0	0	0	0	0	2	0	0	0	0	0	0	0	0	0	0
G10022.5	14	+	1173	6	novel_not_in_catalog	ENSMUSG00000021918	novel	1317	6	coding	299	900	166	1065	30673583	30681600	FALSE	TRUE	TRUE	Full	1	14	4.4542	0.0857742	F	0	0	0	0	0	0	0	0	0	0	0	0	0	0	0	0	0	0	0	0	0	0	0	0
G10022.7	14	+	3256	15	full-splice_match	ENSMUSG00000021918	ENSMUST00000228328	4245	15	coding	792	2379	166	2544	30673583	30709161	FALSE	TRUE	FALSE	Full	1	14	3.67691	0.0708059	F	0	0	0	0	0	0	2	0	0	0	0	0	0	0	0	0	0	0	0	0	0	0	0	0
G10022.8	14	+	3814	15	full-splice_match	ENSMUSG00000021918	ENSMUST00000228328	4245	15	coding	792	2379	166	2544	30673583	30709161	FALSE	TRUE	TRUE	Full	9	14	4.58564	0.0883052	F	0	0	0	0	2	0	0	0	0	2	3	0	0	0	3	0	0	0	0	0	2	0	0	0
G10022.9	14	+	4158	15	full-splice_match	ENSMUSG00000021918	ENSMUST00000228328	4245	15	coding	792	2379	166	2544	30673583	30709161	FALSE	TRUE	TRUE	Full	4	14	3.83984	0.0739434	F	0	2	0	0	0	0	0	0	0	3	0	2	0	0	0	0	2	0	0	0	0	0	0	0
G10023.1	14	-	3487	4	full-splice_match	ENSMUSG00000021917	ENSMUST00000228736	702	4	coding	102	309	123	431	30723197	30722054	FALSE	TRUE	TRUE	Full	1	6	3.61348	0.029625	F	0	0	0	0	0	0	0	0	0	0	0	2	0	0	0	0	0	0	0	0	0	0	0	0
G10023.11	14	-	1094	4	full-splice_match	ENSMUSG00000021917	ENSMUST00000186131	1005	4	coding	102	309	640	948	30723197	30722054	FALSE	FALSE	FALSE	Full	2	6	7.6576	0.0627806	F	0	0	0	0	0	0	0	0	0	0	0	0	0	0	0	0	0	0	0	0	0	0	0	0
G10023.3	14	-	1205	4	full-splice_match	ENSMUSG00000021917	ENSMUST00000186131	1005	4	coding	102	309	627	935	30723197	30722054	FALSE	FALSE	TRUE	Full	48	6	98.3136	0.806021	T	39	26	47	56	62	45	64	72	29	42	29	41	38	75	66	81	48	48	135	74	73	49	24	38
G10023.6	14	-	1173	3	full-splice_match	ENSMUSG00000021917	ENSMUST00000226374	592	3	non_coding	NA	NA	NA	NA	NA	NA	NA	TRUE	TRUE	Full	6	6	4.26092	0.034933	F	0	0	0	0	0	0	0	0	0	0	0	0	0	0	0	2	2	0	4	0	0	0	0	0
G10023.7	14	-	1242	2	full-splice_match	ENSMUSG00000021917	ENSMUST00000226290	1241	2	non_coding	NA	NA	NA	NA	NA	NA	NA	TRUE	TRUE	Full	14	6	5.11209	0.0419113	F	0	4	0	0	0	0	0	2	0	2	0	0	0	0	0	2	0	0	2	0	0	0	0	0
G10023.9	14	-	627	3	novel_in_catalog	ENSMUSG00000021917	novel	949	4	non_coding	NA	NA	NA	NA	NA	NA	NA	TRUE	TRUE	Full	1	6	3.01633	0.0247293	F	0	0	0	0	0	0	0	0	0	0	0	0	0	0	0	0	0	0	0	0	0	0	0	0
G10024.10	14	+	1505	10	full-splice_match	ENSMUSG00000021916	ENSMUST00000168584	1498	10	coding	371	1116	75	1190	30728454	30733632	FALSE	TRUE	TRUE	Full	37	18	5.76653	0.0850109	F	0	0	3	0	4	2	3	0	0	2	2	0	0	4	2	2	5	5	8	5	5	6	0	2
G10024.11	14	+	1733	9	novel_in_catalog	ENSMUSG00000021916	novel	1498	10	coding	202	609	810	1418	30732098	30733632	FALSE	TRUE	TRUE	Full	24	18	5.23006	0.0771023	F	0	2	2	0	0	0	0	0	0	0	0	0	0	0	0	0	0	4	3	0	0	2	0	0
G10024.12	14	+	2313	7	novel_in_catalog	ENSMUSG00000021916	novel	1498	10	coding	177	534	75	608	30728454	30731896	TRUE	TRUE	TRUE	Full	1	18	3.14531	0.0463685	F	0	0	0	0	0	0	0	0	0	0	0	0	0	0	0	0	0	0	0	0	0	0	0	0
G10024.14	14	+	1985	10	novel_not_in_catalog	ENSMUSG00000021916	novel	1498	10	coding	202	609	1062	1670	30732098	30733632	FALSE	TRUE	TRUE	Full	1	18	3.09713	0.0456582	F	0	2	0	0	0	0	0	0	0	0	0	0	0	0	0	0	0	0	0	0	0	0	0	0
G10024.16	14	+	2052	9	novel_in_catalog	ENSMUSG00000021916	novel	2018	10	coding	202	609	1129	1737	30732098	30733632	FALSE	TRUE	TRUE	Full	2	18	4.07436	0.0600648	F	0	0	0	0	0	0	0	0	0	0	0	0	0	0	0	0	0	0	0	0	0	0	0	0
G10024.18	14	+	1591	10	full-splice_match	ENSMUSG00000021916	ENSMUST00000022476	2018	10	coding	371	1116	161	1276	30728454	30733632	FALSE	TRUE	TRUE	Full	24	18	6.10774	0.0900411	T	0	4	0	2	0	0	3	0	4	0	0	4	2	3	2	0	2	0	4	4	0	0	0	2
G10024.19	14	+	2266	7	novel_in_catalog	ENSMUSG00000021916	novel	1923	9	coding	191	576	161	736	30728454	30732166	TRUE	TRUE	TRUE	Full	1	18	4.19419	0.0618312	F	0	0	0	0	0	0	0	0	0	0	0	0	0	3	0	0	0	0	0	0	0	0	0	0
G10024.20	14	+	2517	6	incomplete-splice_match	ENSMUSG00000021916	ENSMUST00000226348	1923	9	coding	191	576	161	736	30728454	30732166	FALSE	TRUE	TRUE	Full	1	18	3.32437	0.0490084	F	0	0	0	0	0	0	0	0	0	0	0	0	0	0	0	0	0	0	0	0	0	0	0	0
G10024.22	14	+	1308	6	incomplete-splice_match	ENSMUSG00000021916	ENSMUST00000226348	1923	9	coding	191	576	145	720	30728454	30732166	FALSE	TRUE	TRUE	Full	1	18	2.88641	0.0425518	F	0	0	0	0	0	0	0	0	0	0	0	0	0	0	0	0	0	0	0	0	0	0	0	0
G10024.23	14	+	1618	11	novel_in_catalog	ENSMUSG00000021916	novel	2018	10	coding	371	1116	188	1303	30728454	30733632	FALSE	TRUE	TRUE	Full	1	18	3.78186	0.0557527	F	0	0	0	0	0	0	0	0	0	0	0	0	0	0	0	2	0	0	0	0	0	0	0	0
G10024.24	14	+	2668	5	incomplete-splice_match	ENSMUSG00000021916	ENSMUST00000226348	1923	9	coding	177	534	92	625	30728454	30731896	FALSE	TRUE	TRUE	Full	1	18	2.88641	0.0425518	F	0	0	0	0	0	0	0	0	0	0	0	0	0	0	0	0	0	0	0	0	0	0	0	0
G10024.3	14	+	1398	9	novel_in_catalog	ENSMUSG00000021916	novel	1498	10	coding	305	918	81	998	30728454	30733547	FALSE	TRUE	TRUE	Full	1	18	3.06646	0.0452062	F	0	0	0	0	0	0	0	0	0	0	0	0	0	0	0	0	0	0	0	0	0	2	0	0
G10024.4	14	+	2211	6	novel_in_catalog	ENSMUSG00000021916	novel	1498	10	coding	177	534	81	614	30728454	30731896	TRUE	TRUE	TRUE	Full	2	18	3.20615	0.0472655	F	0	0	0	0	0	0	0	0	0	0	0	0	0	0	0	0	0	0	0	0	2	0	2	0
G10024.5	14	+	1113	7	incomplete-splice_match	ENSMUSG00000021916	ENSMUST00000168584	1498	10	coding	227	684	79	762	30728454	30732405	FALSE	TRUE	TRUE	Full	1	18	3.46801	0.0511258	F	0	0	0	0	0	0	0	0	0	0	0	0	0	0	0	0	0	0	0	0	0	0	0	0
G10024.6	14	+	2094	8	novel_in_catalog	ENSMUSG00000021916	novel	1498	10	coding	191	576	79	654	30728454	30732166	TRUE	TRUE	TRUE	Full	1	18	3.4856	0.0513852	F	0	0	0	0	0	0	0	0	0	2	0	0	0	0	0	0	0	0	0	0	0	0	0	0
G10024.7	14	+	2526	6	novel_in_catalog	ENSMUSG00000021916	novel	1498	10	coding	177	534	78	611	30728454	30731896	TRUE	TRUE	TRUE	Full	1	18	3.42035	0.0504233	F	0	0	0	0	0	0	0	0	0	0	0	0	0	0	0	0	2	0	0	0	0	0	0	0
G10024.8	14	+	1596	11	novel_in_catalog	ENSMUSG00000021916	novel	1498	10	coding	371	1116	171	1286	30728454	30733632	FALSE	TRUE	TRUE	Full	2	18	3.33084	0.0491037	F	0	0	0	0	0	0	0	0	0	2	0	0	0	0	0	0	0	0	2	0	0	0	0	0
G10024.9	14	+	1423	10	novel_not_in_catalog	ENSMUSG00000021916	novel	1498	10	coding	202	609	500	1108	30732098	30733632	FALSE	TRUE	TRUE	Full	1	18	3.36102	0.0495486	F	0	0	0	0	0	0	0	0	0	0	0	0	0	0	0	0	0	0	0	0	0	0	0	0
G10025.10	14	-	1807	15	full-splice_match	ENSMUSG00000042354	ENSMUST00000226740	1765	15	coding	252	759	931	1689	30736180	30734509	FALSE	TRUE	TRUE	Full	12	33	6.67055	0.0288427	F	0	0	0	0	0	0	0	5	4	0	0	4	4	3	0	0	3	4	5	3	0	5	0	0
G10025.11	14	-	1793	15	novel_in_catalog	ENSMUSG00000042354	novel	1947	15	coding	420	1263	413	1675	30739042	30734509	FALSE	TRUE	TRUE	Full	22	33	5.48094	0.0236989	F	0	0	2	0	2	0	0	3	0	4	0	2	0	2	0	8	0	4	2	3	3	5	4	0
G10025.12	14	-	1869	15	novel_in_catalog	ENSMUSG00000042354	novel	1947	15	coding	252	759	993	1751	30736180	30734509	FALSE	TRUE	TRUE	Full	21	33	7.08068	0.0306161	F	0	0	4	7	7	2	0	0	0	7	6	4	2	0	4	0	0	5	0	0	0	0	0	2
G10025.13	14	-	1470	12	incomplete-splice_match	ENSMUSG00000042354	ENSMUST00000037739	1947	15	coding	258	777	576	1352	30736560	30734509	FALSE	TRUE	TRUE	Full	1	33	5.5351	0.0239331	F	0	0	0	0	0	0	0	0	0	0	0	0	0	0	0	0	0	0	0	0	0	0	0	0
G10025.15	14	-	1808	15	full-splice_match	ENSMUSG00000042354	ENSMUST00000037739	1947	15	coding	538	1617	74	1690	30740898	30734509	FALSE	TRUE	TRUE	Full	48	33	92.1328	0.398372	T	53	43	62	38	60	47	51	43	68	58	49	47	50	73	45	50	39	36	43	57	48	50	53	22
G10025.16	14	-	1833	15	novel_not_in_catalog	ENSMUSG00000042354	novel	1947	15	coding	526	1581	135	1715	30739800	30734509	FALSE	TRUE	TRUE	Full	1	33	3.46801	0.0149953	F	0	0	0	0	0	0	0	0	0	0	0	0	0	0	0	0	0	0	0	0	0	0	0	0
G10025.17	14	-	3264	13	incomplete-splice_match	ENSMUSG00000042354	ENSMUST00000037739	1947	15	coding	252	759	2388	3146	30736180	30734509	FALSE	TRUE	TRUE	Full	1	33	3.59279	0.0155348	F	0	0	0	0	0	0	0	0	0	0	2	0	0	0	0	0	0	0	0	0	0	0	0	0
G10025.18	14	-	1416	11	incomplete-splice_match	ENSMUSG00000042354	ENSMUST00000037739	1947	15	coding	258	777	522	1298	30736560	30734509	FALSE	TRUE	TRUE	Full	1	33	2.95845	0.012792	F	0	0	0	0	0	0	0	0	0	0	0	0	0	0	0	0	0	0	0	0	0	0	0	0
G10025.23	14	-	2754	14	novel_in_catalog	ENSMUSG00000042354	novel	1947	15	coding	252	759	1878	2636	30736180	30734509	FALSE	TRUE	TRUE	Full	2	33	3.64852	0.0157758	F	0	2	0	0	0	0	0	0	0	0	0	0	0	0	0	0	0	0	0	0	0	0	0	0
G10025.24	14	-	2806	14	novel_in_catalog	ENSMUSG00000042354	novel	1947	15	coding	252	759	1930	2688	30736180	30734509	FALSE	TRUE	TRUE	Full	17	33	5.54557	0.0239784	F	0	0	2	0	0	0	0	0	0	0	0	4	0	0	0	0	0	0	0	0	3	2	0	0
G10025.25	14	-	2792	14	novel_in_catalog	ENSMUSG00000042354	novel	1947	15	coding	252	759	1916	2674	30736180	30734509	FALSE	TRUE	TRUE	Full	12	33	5.67705	0.0245469	F	0	0	0	0	0	0	0	0	2	0	0	0	0	0	0	0	2	0	0	2	0	7	0	2
G10025.26	14	-	2973	13	novel_in_catalog	ENSMUSG00000042354	novel	1947	15	coding	252	759	2097	2855	30736180	30734509	FALSE	TRUE	TRUE	Full	1	33	3.33721	0.0144297	F	0	0	0	0	0	0	0	0	0	0	0	0	0	0	0	0	0	0	0	0	0	0	2	0
G10025.27	14	-	2157	14	novel_in_catalog	ENSMUSG00000042354	novel	1765	15	coding	252	759	1281	2039	30736180	30734509	FALSE	TRUE	TRUE	Full	2	33	3.12386	0.0135072	F	0	0	0	0	2	0	0	0	0	0	0	0	0	0	0	0	0	0	0	0	0	0	0	0
G10025.28	14	-	2231	14	novel_in_catalog	ENSMUSG00000042354	novel	1947	15	coding	252	759	1355	2113	30736180	30734509	FALSE	TRUE	TRUE	Full	11	33	3.71407	0.0160592	F	2	0	0	2	2	0	0	0	0	3	0	0	0	2	2	3	0	0	2	0	0	0	0	0
G10025.29	14	-	2170	14	novel_in_catalog	ENSMUSG00000042354	novel	1947	15	coding	285	858	74	931	30740898	30736543	TRUE	TRUE	TRUE	Full	7	33	4.85765	0.0210039	F	0	2	2	0	6	0	0	0	0	2	3	0	0	0	0	0	0	0	0	0	0	0	3	0
G10025.3	14	-	1797	14	novel_in_catalog	ENSMUSG00000042354	novel	1947	15	coding	252	759	920	1678	30736180	30734509	FALSE	TRUE	TRUE	Full	1	33	2.85755	0.0123557	F	0	0	0	0	0	0	0	0	0	0	0	0	0	0	0	0	0	0	0	2	0	0	0	0
G10025.30	14	-	3154	13	novel_in_catalog	ENSMUSG00000042354	novel	1947	15	coding	252	759	2278	3036	30736180	30734509	FALSE	TRUE	TRUE	Full	2	33	4.84559	0.0209518	F	0	0	0	0	0	0	0	0	0	3	0	0	0	0	0	0	0	0	0	0	0	0	0	0
G10025.31	14	-	2459	13	novel_in_catalog	ENSMUSG00000042354	novel	1947	15	coding	252	759	1583	2341	30736180	30734509	FALSE	TRUE	TRUE	Full	1	33	3.61348	0.0156243	F	0	0	0	0	0	0	0	0	0	0	0	2	0	0	0	0	0	0	0	0	0	0	0	0
G10025.32	14	-	3639	11	novel_in_catalog	ENSMUSG00000042354	novel	1947	15	coding	204	615	121	735	30740898	30738199	TRUE	TRUE	TRUE	Full	1	33	3.09713	0.0133916	F	0	2	0	0	0	0	0	0	0	0	0	0	0	0	0	0	0	0	0	0	0	0	0	0
G10025.34	14	-	2997	12	novel_in_catalog	ENSMUSG00000042354	novel	1947	15	coding	136	411	121	531	30740898	30738775	TRUE	TRUE	TRUE	Full	1	33	3.00059	0.0129742	F	0	0	0	2	0	0	0	0	0	0	0	0	0	0	0	0	0	0	0	0	0	0	0	0
G10025.39	14	-	1917	16	novel_not_in_catalog	ENSMUSG00000042354	novel	1947	15	coding	575	1728	74	1801	30740898	30734509	FALSE	TRUE	TRUE	Full	3	33	5.57427	0.0241025	F	0	0	0	0	0	0	0	0	0	0	0	0	0	0	0	0	0	4	0	4	3	0	0	0
G10025.4	14	-	2156	14	novel_in_catalog	ENSMUSG00000042354	novel	1947	15	coding	252	759	1279	2037	30736180	30734509	FALSE	TRUE	TRUE	Full	2	33	3.03615	0.013128	F	0	2	0	0	0	0	0	0	0	0	0	0	0	0	0	0	0	0	0	0	0	0	0	0
G10025.41	14	-	1720	14	incomplete-splice_match	ENSMUSG00000042354	ENSMUST00000037739	1947	15	coding	526	1581	24	1604	30739800	30734509	FALSE	TRUE	TRUE	Full	1	33	7.35382	0.0317971	F	0	0	0	0	0	0	4	0	0	0	0	0	0	0	0	0	0	0	0	0	0	0	0	0
G10025.42	14	-	2742	14	novel_in_catalog	ENSMUSG00000042354	novel	1765	15	coding	252	759	1868	2626	30736180	30734509	FALSE	TRUE	TRUE	Full	4	33	3.73076	0.0161314	F	0	0	0	0	0	0	0	0	0	0	0	0	0	0	0	0	0	2	0	2	0	0	0	0
G10025.45	14	-	3394	12	novel_in_catalog	ENSMUSG00000042354	novel	1947	15	coding	252	759	2520	3278	30736180	30734509	FALSE	TRUE	TRUE	Full	1	33	3.092	0.0133695	F	0	0	0	0	0	0	0	0	0	0	0	0	0	0	0	0	0	0	0	0	0	0	0	0
G10025.46	14	-	2042	13	novel_in_catalog	ENSMUSG00000042354	novel	1947	15	coding	391	1176	119	1294	30740898	30735606	TRUE	TRUE	TRUE	Full	1	33	3.1072	0.0134352	F	0	0	0	0	0	0	0	0	0	0	0	0	0	0	0	0	0	0	0	0	0	0	0	0
G10025.48	14	-	1757	15	full-splice_match	ENSMUSG00000042354	ENSMUST00000037739	1947	15	coding	538	1617	74	1690	30740898	30734509	FALSE	TRUE	TRUE	Full	1	33	7.24757	0.0313377	F	0	0	0	0	0	0	0	0	0	0	0	0	0	0	0	0	0	0	0	0	0	0	0	0
G10025.49	14	-	767	7	incomplete-splice_match	ENSMUSG00000042354	ENSMUST00000037739	1947	15	coding	215	645	123	767	30740898	30737232	FALSE	TRUE	TRUE	Full	1	33	3.20782	0.0138702	F	0	0	0	0	0	0	0	0	0	0	0	0	0	0	2	0	0	0	0	0	0	0	0	0
G10025.5	14	-	402	3	novel_in_catalog	ENSMUSG00000042354	novel	1947	15	non_coding	NA	NA	NA	NA	NA	NA	NA	TRUE	TRUE	Full	1	33	3.78186	0.0163523	F	0	0	0	0	0	0	0	0	0	0	0	0	0	0	0	2	0	0	0	0	0	0	0	0
G10025.6	14	-	1786	15	novel_in_catalog	ENSMUSG00000042354	novel	1947	15	coding	515	1548	121	1668	30740898	30734509	FALSE	TRUE	TRUE	Full	11	33	4.26174	0.0184273	F	0	0	3	0	0	0	0	2	0	0	0	0	3	2	2	0	0	0	4	0	0	0	0	0
G10025.7	14	-	1762	15	novel_not_in_catalog	ENSMUSG00000042354	novel	1947	15	coding	227	684	961	1644	30736574	30734509	FALSE	TRUE	TRUE	Full	6	33	4.36583	0.0188774	F	0	0	0	0	0	0	0	0	0	2	0	0	0	0	0	0	0	0	2	0	0	0	0	0
G10025.8	14	-	2685	14	novel_not_in_catalog	ENSMUSG00000042354	novel	1947	15	coding	227	684	1884	2567	30736574	30734509	FALSE	TRUE	TRUE	Full	1	33	3.62138	0.0156585	F	0	0	0	0	0	0	0	0	0	0	0	0	0	0	0	0	0	0	0	0	0	0	0	0
G10025.9	14	-	1753	15	novel_not_in_catalog	ENSMUSG00000042354	novel	1947	15	coding	504	1515	121	1635	30740898	30734509	FALSE	TRUE	TRUE	Full	16	33	4.65547	0.0201297	F	0	2	0	0	5	0	0	4	2	0	0	4	0	2	4	4	0	0	2	3	0	0	2	0
G10029.1	14	-	1368	4	full-splice_match	ENSMUSG00000058351	ENSMUST00000064032	791	4	coding	86	261	180	440	30850740	30845711	FALSE	TRUE	TRUE	Full	5	6	5.64622	0.154952	F	0	0	0	0	0	0	0	0	0	0	0	0	0	0	0	0	0	0	0	0	0	0	0	0
G10029.2	14	-	1227	3	novel_in_catalog	ENSMUSG00000058351	novel	791	4	non_coding	NA	NA	NA	NA	NA	NA	NA	TRUE	TRUE	Full	2	6	3.55876	0.0976649	F	0	0	0	0	0	0	0	0	0	0	0	0	0	0	0	0	0	0	0	0	0	0	0	0
G10029.3	14	-	1303	3	novel_in_catalog	ENSMUSG00000058351	novel	791	4	coding	83	252	169	420	30850740	30810971	FALSE	TRUE	TRUE	Full	1	6	3.3374	0.09159	F	0	0	0	0	0	0	0	0	0	0	0	0	0	0	0	0	0	0	0	0	0	0	0	0
G10029.4	14	-	1201	2	full-splice_match	ENSMUSG00000058351	ENSMUST00000203261	1219	2	coding	102	309	155	463	30850740	30810826	FALSE	TRUE	TRUE	Full	27	6	6.05733	0.166234	F	0	3	3	3	0	0	0	6	3	0	2	3	3	5	8	4	2	3	3	5	0	0	0	2
G10029.7	14	-	617	2	full-splice_match	ENSMUSG00000058351	ENSMUST00000090205	426	2	coding	60	183	127	309	30850740	30846759	FALSE	TRUE	TRUE	Full	1	6	5.5351	0.151902	F	0	0	0	0	0	0	0	0	0	0	0	0	0	0	0	0	0	0	0	0	0	0	0	0
G10029.8	14	-	381	2	full-splice_match	ENSMUSG00000058351	ENSMUST00000049732	311	2	coding	80	243	127	369	30850740	30846475	FALSE	TRUE	TRUE	Full	46	6	12.3037	0.337657	T	4	3	2	13	8	7	4	14	5	9	4	11	8	10	12	21	0	5	28	2	10	4	3	5
G10032.1	14	+	1749	14	novel_not_in_catalog	ENSMUSG00000071547	novel	1407	13	coding	390	1173	498	1670	30857304	30860999	FALSE	TRUE	TRUE	Full	2	5	3.83101	0.171234	F	0	0	0	0	0	0	0	0	0	0	0	0	0	0	2	0	0	0	0	0	0	0	0	0
G10032.2	14	+	1791	14	full-splice_match	ENSMUSG00000071547	ENSMUST00000227096	1848	14	coding	553	1662	51	1712	30853114	30860999	FALSE	TRUE	TRUE	Full	12	5	5.08064	0.227089	F	3	10	3	0	0	0	3	3	0	0	0	0	0	2	2	0	0	3	0	0	0	0	2	0
G10032.3	14	+	623	4	full-splice_match	ENSMUSG00000071547	ENSMUST00000227690	737	4	coding	153	462	82	543	30860295	30860999	FALSE	TRUE	TRUE	Full	5	5	4.24854	0.189896	F	2	0	0	0	0	0	0	0	0	0	0	0	0	0	0	0	0	0	0	0	0	3	0	3
G10032.4	14	+	680	2	novel_in_catalog	ENSMUSG00000071547	novel	737	4	coding	192	579	6	584	30860295	30860980	FALSE	TRUE	TRUE	Full	1	5	3.14305	0.140484	F	0	0	0	0	0	0	0	0	0	0	0	0	0	0	0	0	0	0	0	0	0	0	0	0
G10032.5	14	+	539	3	incomplete-splice_match	ENSMUSG00000071547	ENSMUST00000227690	737	4	coding	153	462	1	462	30860295	30860999	FALSE	TRUE	TRUE	Full	22	5	6.06971	0.271297	T	0	0	0	0	0	0	2	0	0	0	0	0	2	5	3	3	3	2	3	6	4	0	0	0
G10034.11	14	-	1539	3	incomplete-splice_match	ENSMUSG00000021910	ENSMUST00000168206	4990	17	coding	232	699	205	903	30894481	30893525	FALSE	TRUE	TRUE	Full	8	4	3.8856	0.192189	F	0	0	2	0	0	0	3	0	0	0	0	0	0	0	0	0	0	3	2	0	0	0	0	0
G10034.4	14	-	1398	2	incomplete-splice_match	ENSMUSG00000021910	ENSMUST00000168206	4990	17	coding	232	699	64	762	30894481	30893525	FALSE	TRUE	TRUE	Full	14	4	4.99744	0.247183	F	0	0	0	0	0	0	0	2	0	0	2	0	2	3	2	0	0	0	2	0	9	0	4	0
G10034.5	14	-	1635	4	incomplete-splice_match	ENSMUSG00000021910	ENSMUST00000168206	4990	17	coding	232	699	301	999	30894481	30893525	FALSE	TRUE	TRUE	Full	15	4	4.38928	0.217102	F	0	7	0	0	4	0	2	0	2	0	0	0	0	0	2	0	3	0	0	2	0	0	0	2
G10034.6	14	-	1736	5	incomplete-splice_match	ENSMUSG00000021910	ENSMUST00000168206	4990	17	coding	232	699	402	1100	30894481	30893525	FALSE	TRUE	TRUE	Full	37	4	6.94527	0.343526	T	2	2	5	2	0	6	5	2	4	0	5	5	3	2	3	0	7	7	7	4	9	9	3	6
G10035.11	14	-	2671	3	full-splice_match	ENSMUSG00000021910	ENSMUST00000171735	1763	3	coding	153	462	39	500	30928619	30925085	FALSE	TRUE	TRUE	Full	1	3	3.59279	0.137496	F	0	0	0	0	0	0	0	0	0	0	2	0	0	0	0	0	0	0	0	0	0	0	0	0
G10035.3	14	-	2650	14	full-splice_match	ENSMUSG00000021910	ENSMUST00000172142	2780	14	coding	516	1551	39	1589	30928619	30906335	FALSE	TRUE	TRUE	Full	48	3	19.0955	0.730785	T	10	16	21	20	10	23	13	6	11	8	11	8	4	8	8	5	18	17	6	21	14	11	23	6
G10035.4	14	-	3194	13	incomplete-splice_match	ENSMUSG00000021910	ENSMUST00000022469	5559	21	coding	620	1863	39	1901	30928619	30906567	FALSE	TRUE	TRUE	Full	5	3	3.44183	0.131719	F	0	0	0	2	0	0	0	0	0	0	0	2	0	0	0	0	0	2	0	0	0	0	0	2
G10036.10	14	+	701	6	full-splice_match	ENSMUSG00000091898	ENSMUST00000169169	721	6	coding	161	486	40	525	30930312	30933494	FALSE	TRUE	TRUE	Full	45	1	12.5002	1	T	2	4	2	8	6	4	0	7	2	7	2	3	4	6	10	6	0	7	10	2	4	4	0	6
G10039.1	14	-	1516	7	novel_in_catalog	ENSMUSG00000021902	novel	1971	10	coding	135	408	657	1064	30971605	30960098	FALSE	TRUE	TRUE	Full	1	9	2.97518	0.0920852	F	0	0	0	0	0	0	0	0	0	0	0	0	0	0	0	0	0	0	0	0	0	0	0	0
G10039.10	14	-	1464	5	incomplete-splice_match	ENSMUSG00000021902	ENSMUST00000022459	2084	11	non_coding	NA	NA	NA	NA	NA	NA	NA	TRUE	TRUE	Full	1	9	3.33721	0.10329	F	0	0	0	0	0	0	0	0	0	0	0	0	0	0	0	0	0	0	0	0	0	0	2	0
G10039.12	14	-	1571	5	novel_not_in_catalog	ENSMUSG00000021902	novel	3761	4	coding	116	351	708	1058	30971605	30967597	FALSE	TRUE	TRUE	Full	1	9	3.06646	0.0949104	F	0	0	0	0	0	0	0	0	0	0	0	0	0	0	0	0	0	0	0	0	0	2	0	0
G10039.2	14	-	2644	10	novel_in_catalog	ENSMUSG00000021902	novel	2084	11	coding	132	399	1768	2166	30961742	30960313	FALSE	TRUE	TRUE	Full	1	9	3.36102	0.104027	F	0	0	0	0	0	0	0	0	0	0	0	0	0	0	0	0	0	0	0	0	0	0	0	0
G10039.3	14	-	2108	11	full-splice_match	ENSMUSG00000021902	ENSMUST00000022459	2084	11	coding	307	924	708	1631	30971605	30960313	FALSE	TRUE	TRUE	Full	17	9	4.39252	0.135954	F	0	0	2	0	0	0	2	0	0	0	0	0	0	0	2	0	3	0	2	4	2	3	2	0
G10039.4	14	-	1887	10	novel_in_catalog	ENSMUSG00000021902	novel	2084	11	coding	164	495	647	1141	30971605	30961613	TRUE	TRUE	TRUE	Full	1	9	3.32437	0.102893	F	0	0	0	0	0	0	0	0	0	0	0	0	0	0	0	0	0	0	0	0	0	0	0	0
G10039.5	14	-	1990	10	full-splice_match	ENSMUSG00000021902	ENSMUST00000226565	1971	10	coding	268	807	707	1513	30971605	30960313	FALSE	TRUE	TRUE	Full	16	9	3.93897	0.121916	F	2	4	0	0	2	0	0	0	0	0	0	0	0	0	0	0	0	3	0	0	3	4	0	0
G10039.6	14	-	1705	8	novel_in_catalog	ENSMUSG00000021902	novel	1809	11	coding	173	522	707	1228	30971605	30960313	FALSE	TRUE	TRUE	Full	5	9	3.45906	0.107062	F	0	3	0	0	0	0	0	0	0	0	0	0	0	0	0	0	2	2	0	0	0	0	0	0
G10039.7	14	-	1774	9	novel_in_catalog	ENSMUSG00000021902	novel	1971	10	coding	230	693	637	1329	30971605	30960098	FALSE	TRUE	TRUE	Full	1	9	4.4542	0.137863	T	0	0	0	0	0	0	0	0	0	0	0	0	0	0	0	0	0	0	0	0	0	0	0	0
G10040.11	14	+	2837	11	incomplete-splice_match	ENSMUSG00000021901	ENSMUST00000022458	3460	17	coding	564	1695	55	1749	30976179	30980796	FALSE	TRUE	TRUE	Full	3	13	3.3595	0.0537454	F	0	2	0	0	0	0	0	0	2	0	0	0	0	0	0	0	0	0	0	0	0	0	0	0
G10040.14	14	+	2459	8	incomplete-splice_match	ENSMUSG00000021901	ENSMUST00000022458	3460	17	coding	358	1077	301	1377	30978247	30980796	FALSE	TRUE	TRUE	Full	3	13	3.55296	0.0568404	F	0	0	0	0	0	0	0	0	0	0	0	0	0	2	0	0	0	3	0	0	0	2	0	0
G10040.15	14	+	2198	7	incomplete-splice_match	ENSMUSG00000021901	ENSMUST00000022458	3460	17	coding	358	1077	40	1116	30978247	30980796	FALSE	TRUE	TRUE	Full	1	13	4.19992	0.0671903	F	0	0	0	0	0	0	0	0	0	0	0	0	0	0	0	0	0	0	0	0	0	0	0	0
G10040.17	14	+	2007	5	incomplete-splice_match	ENSMUSG00000021901	ENSMUST00000190788	3855	16	coding	49	150	776	925	30980472	30980796	FALSE	TRUE	TRUE	Full	9	13	5.42356	0.0867663	F	0	0	0	0	0	0	0	0	0	0	0	0	3	0	0	0	2	0	0	0	4	0	4	0
G10040.18	14	+	1500	4	incomplete-splice_match	ENSMUSG00000021901	ENSMUST00000190788	3855	16	coding	49	150	261	410	30980472	30980796	FALSE	TRUE	TRUE	Full	13	13	3.91117	0.062571	F	0	0	0	0	2	0	0	2	0	0	0	0	0	0	3	0	2	0	0	2	0	3	0	2
G10040.19	14	+	1356	3	incomplete-splice_match	ENSMUSG00000021901	ENSMUST00000190788	3855	16	coding	101	306	566	871	30981096	30981401	FALSE	TRUE	TRUE	Full	2	13	3.32605	0.0532101	F	0	0	0	0	0	0	2	0	0	0	0	0	0	0	0	0	0	0	0	0	0	0	0	0
G10040.2	14	+	3282	16	novel_in_catalog	ENSMUSG00000021901	novel	3460	17	coding	646	1941	252	2192	30973903	30980796	FALSE	TRUE	TRUE	Full	14	13	5.00136	0.0800119	F	3	0	2	3	0	0	0	0	2	0	5	0	2	0	0	0	0	0	0	0	0	0	0	0
G10040.3	14	+	3374	16	novel_in_catalog	ENSMUSG00000021901	novel	3460	17	coding	649	1950	321	2270	30975000	30980796	FALSE	TRUE	TRUE	Full	1	13	3.59279	0.0574775	F	0	0	0	0	0	0	0	0	0	0	2	0	0	0	0	0	0	0	0	0	0	0	0	0
G10040.4	14	+	3535	16	novel_in_catalog	ENSMUSG00000021901	novel	3460	17	coding	649	1950	496	2445	30975000	30980796	FALSE	TRUE	TRUE	Full	2	13	4.03617	0.0645707	F	3	2	0	0	0	0	0	0	0	0	0	0	0	0	0	0	0	0	0	0	0	0	0	0
G10040.5	14	+	3086	17	novel_in_catalog	ENSMUSG00000021901	novel	3460	17	coding	456	1371	134	1504	30973575	30979706	TRUE	TRUE	TRUE	Full	2	13	3.22907	0.0516588	F	0	2	0	0	0	0	0	0	0	0	0	0	0	0	0	0	0	0	0	0	0	0	0	0
G10040.6	14	+	3398	17	full-splice_match	ENSMUSG00000021901	ENSMUST00000022458	3460	17	coding	728	2187	130	2316	30973575	30980796	FALSE	TRUE	TRUE	Full	35	13	14.53	0.232452	T	19	20	21	12	0	4	0	0	14	0	8	3	5	8	0	0	14	13	0	4	6	4	12	0
G10040.7	14	+	3270	14	novel_in_catalog	ENSMUSG00000021901	novel	3460	17	coding	606	1821	362	2182	30973903	30980796	FALSE	TRUE	TRUE	Full	1	13	3.07509	0.0491953	F	0	0	0	0	0	0	0	0	0	0	0	0	0	0	0	0	0	0	0	0	2	0	0	0
G10040.9	14	+	2958	13	novel_in_catalog	ENSMUSG00000021901	novel	3460	17	coding	606	1821	48	1868	30973903	30980796	FALSE	TRUE	TRUE	Full	1	13	5.27006	0.0843105	F	0	0	0	0	0	0	0	0	3	0	0	0	0	0	0	0	0	0	0	0	0	0	0	0
G10041.2	14	-	3569	20	incomplete-splice_match	ENSMUSG00000019027	ENSMUST00000048603	12872	78	coding	1123	3372	158	3529	30991395	30982383	FALSE	TRUE	TRUE	Full	7	1	4.00867	1	T	0	0	2	2	0	0	0	0	0	2	4	0	0	0	0	0	0	0	0	0	2	0	3	0
G10042.5	14	+	1722	3	novel_not_in_catalog	ENSMUSG00000115311	novel	1558	2	coding	111	336	422	757	30991130	31041931	FALSE	TRUE	TRUE	Full	3	2	7.11357	0.417151	F	0	0	0	0	0	0	0	0	0	0	0	0	0	0	0	0	0	0	0	4	0	0	0	0
G10042.6	14	+	1552	2	full-splice_match	ENSMUSG00000115311	ENSMUST00000228755	1558	2	non_coding	NA	NA	NA	NA	NA	NA	NA	TRUE	TRUE	Full	4	2	9.93918	0.582849	T	0	2	0	0	0	0	0	0	0	0	2	0	0	0	0	0	0	0	0	0	0	0	0	0
G10043.1	14	-	1577	9	incomplete-splice_match	ENSMUSG00000019027	ENSMUST00000048603	12872	78	coding	486	1461	83	1543	31041969	31030695	FALSE	TRUE	TRUE	Full	1	1	3.62379	1	T	0	0	0	0	0	0	0	0	0	0	0	0	0	0	0	0	0	0	0	0	0	0	0	0
G10044.2	14	+	3617	21	full-splice_match	ENSMUSG00000021893	ENSMUST00000022451	3648	21	coding	813	2442	217	2658	31058839	31092979	FALSE	TRUE	TRUE	Full	44	3	11.6901	0.61583	T	11	13	13	11	7	10	9	4	8	13	9	11	4	10	9	2	2	2	2	5	3	4	3	0
G10044.3	14	+	3540	20	novel_in_catalog	ENSMUSG00000021893	novel	3648	21	coding	648	1947	635	2581	31069673	31092979	FALSE	TRUE	TRUE	Full	1	3	3.51337	0.185082	F	0	0	0	0	0	0	0	0	2	0	0	0	0	0	0	0	0	0	0	0	0	0	0	0
G10044.5	14	+	1620	6	incomplete-splice_match	ENSMUSG00000021893	ENSMUST00000143472	4613	21	coding	206	621	36	656	31088158	31092979	FALSE	TRUE	TRUE	Full	1	3	3.77923	0.199087	F	0	0	0	0	0	0	0	0	0	0	0	0	0	0	0	0	0	0	0	0	0	0	0	0
G10046.15	14	-	1597	9	full-splice_match	ENSMUSG00000021892	ENSMUST00000091903	2684	9	coding	458	1377	135	1511	31157914	31096941	FALSE	TRUE	TRUE	Full	1	4	3.31681	0.0577771	F	2	0	0	0	0	0	0	0	0	0	0	0	0	0	0	0	0	0	0	0	0	0	0	0
G10046.16	14	-	1560	9	full-splice_match	ENSMUSG00000021892	ENSMUST00000091903	2684	9	coding	458	1377	133	1509	31157914	31096941	FALSE	TRUE	FALSE	Full	1	4	3.32437	0.0579089	F	0	0	0	0	0	0	0	0	0	0	0	0	0	0	0	0	0	0	0	0	0	0	0	0
G10046.17	14	-	2045	2	incomplete-splice_match	ENSMUSG00000021892	ENSMUST00000091903	2684	9	coding	117	354	135	488	31157914	31155896	FALSE	TRUE	TRUE	Full	13	4	4.71142	0.0820705	F	0	0	0	0	0	0	0	0	0	4	0	0	0	0	3	0	0	0	0	0	2	0	0	0
G10046.4	14	-	2719	9	full-splice_match	ENSMUSG00000021892	ENSMUST00000091903	2684	9	coding	458	1377	133	1509	31157914	31096941	FALSE	TRUE	TRUE	Full	48	4	46.0544	0.802243	T	47	47	29	45	10	20	22	10	35	16	27	18	5	26	34	2	45	47	11	28	32	36	42	11
G10048.1	14	-	2807	6	novel_not_in_catalog	ENSMUSG00000021891	novel	2762	6	coding	255	768	276	1043	31215778	31197279	FALSE	TRUE	TRUE	Full	2	20	3.43504	0.0389098	F	0	0	0	0	2	0	0	2	0	0	0	0	0	0	0	0	0	0	0	0	0	0	0	0
G10048.13	14	-	1956	6	full-splice_match	ENSMUSG00000021891	ENSMUST00000055303	3946	6	coding	282	849	267	1115	31215778	31201592	FALSE	TRUE	TRUE	Full	38	20	10.0347	0.113667	T	5	3	7	8	11	10	7	0	6	2	9	8	4	15	5	4	2	8	2	6	8	2	7	2
G10048.14	14	-	1820	6	novel_not_in_catalog	ENSMUSG00000021891	novel	3946	6	coding	126	381	244	624	31215778	31211134	TRUE	TRUE	TRUE	Full	1	20	6.64875	0.0753125	F	0	0	0	0	0	0	0	0	0	0	0	0	0	0	0	0	0	0	0	0	0	0	0	0
G10048.15	14	-	1818	5	full-splice_match	ENSMUSG00000021891	ENSMUST00000228181	793	5	coding	192	579	271	849	31215778	31201720	FALSE	TRUE	TRUE	Full	17	20	5.71546	0.0647409	F	0	2	0	0	0	3	0	0	0	0	0	2	2	4	0	0	0	0	3	3	0	3	0	0
G10048.16	14	-	1491	3	novel_in_catalog	ENSMUSG00000021891	novel	1027	5	non_coding	NA	NA	NA	NA	NA	NA	NA	TRUE	TRUE	Full	1	20	4.4542	0.0504542	F	0	0	0	0	0	0	0	0	0	0	0	0	0	0	0	0	0	0	0	0	0	0	0	0
G10048.2	14	-	2658	5	novel_in_catalog	ENSMUSG00000021891	novel	2762	6	coding	190	573	271	843	31215778	31197332	FALSE	TRUE	TRUE	Full	1	20	4.98656	0.0564844	F	0	0	0	0	0	0	0	0	0	0	0	0	0	0	0	0	0	0	0	0	0	0	0	0
G10048.24	14	-	1606	5	full-splice_match	ENSMUSG00000021891	ENSMUST00000228181	793	5	coding	192	579	267	845	31215778	31201720	FALSE	TRUE	TRUE	Full	11	20	4.13352	0.0468217	F	0	2	2	2	0	0	0	0	2	0	0	2	2	0	0	0	3	0	4	2	3	0	0	0
G10048.25	14	-	1746	6	full-splice_match	ENSMUSG00000021891	ENSMUST00000055303	3946	6	coding	282	849	267	1115	31215778	31201592	FALSE	TRUE	TRUE	Full	28	20	6.89768	0.0781322	F	3	2	3	3	4	2	10	4	3	2	3	6	7	11	4	0	6	0	0	6	0	10	4	2
G10048.26	14	-	2738	4	novel_in_catalog	ENSMUSG00000021891	novel	793	5	coding	32	99	207	305	31215833	31215735	TRUE	TRUE	TRUE	Full	1	20	3.62138	0.0410206	F	0	0	0	0	0	0	0	0	0	0	0	0	0	0	0	0	0	0	0	0	0	0	0	0
G10048.28	14	-	1471	6	full-splice_match	ENSMUSG00000021891	ENSMUST00000055303	3946	6	coding	282	849	273	1121	31215778	31201592	FALSE	TRUE	FALSE	Full	3	20	3.76789	0.0426801	F	0	0	0	0	0	0	0	0	3	0	0	0	0	0	0	0	0	0	2	2	0	0	0	0
G10048.29	14	-	971	5	full-splice_match	ENSMUSG00000021891	ENSMUST00000228181	793	5	coding	192	579	216	794	31215778	31201720	FALSE	TRUE	TRUE	Full	1	20	2.97518	0.0337008	F	0	0	0	0	0	0	0	0	0	0	0	0	0	0	0	0	0	0	0	0	0	0	0	0
G10048.3	14	-	2665	6	novel_not_in_catalog	ENSMUSG00000021891	novel	2762	6	coding	126	381	267	647	31215778	31211134	TRUE	TRUE	TRUE	Full	1	20	2.75893	0.0312512	F	0	0	0	0	0	0	0	0	0	0	0	0	0	0	0	0	0	0	0	0	0	0	0	0
G10048.30	14	-	1048	6	novel_in_catalog	ENSMUSG00000021891	novel	2388	5	coding	239	720	271	990	31215778	31203364	FALSE	TRUE	TRUE	Full	1	20	3.20782	0.036336	F	0	0	0	0	0	0	0	0	0	0	0	0	0	0	2	0	0	0	0	0	0	0	0	0
G10048.31	14	-	2385	5	full-splice_match	ENSMUSG00000021891	ENSMUST00000228727	2388	5	coding	232	699	271	969	31215778	31204722	FALSE	TRUE	TRUE	Full	14	20	3.6779	0.0416608	F	2	0	2	2	2	3	0	0	0	3	0	3	0	2	0	0	0	2	0	0	0	3	2	0
G10048.32	14	-	1187	6	novel_not_in_catalog	ENSMUSG00000021891	novel	2388	5	coding	250	753	218	970	31215778	31203527	FALSE	TRUE	TRUE	Full	1	20	2.85755	0.0323684	F	0	0	0	0	0	0	0	0	0	0	0	0	0	0	0	0	0	0	0	2	0	0	0	0
G10048.33	14	-	2152	5	full-splice_match	ENSMUSG00000021891	ENSMUST00000228727	2388	5	coding	232	699	271	969	31215778	31204722	FALSE	TRUE	FALSE	Full	1	20	3.78186	0.0428384	F	0	0	0	0	0	0	0	0	0	0	0	0	0	0	0	2	0	0	0	0	0	0	0	0
G10048.34	14	-	1945	2	full-splice_match	ENSMUSG00000021891	ENSMUST00000227852	692	2	coding	32	99	212	310	31215833	31215735	FALSE	TRUE	TRUE	Full	2	20	3.34533	0.0378936	F	0	0	0	2	0	0	0	0	0	0	0	0	0	0	0	0	0	0	0	0	0	0	0	0
G10048.4	14	-	2129	6	full-splice_match	ENSMUSG00000021891	ENSMUST00000227777	2762	6	coding	255	768	262	1029	31215778	31197279	FALSE	TRUE	TRUE	Full	9	20	5.0338	0.0570195	F	0	0	5	2	0	0	5	0	0	0	0	0	0	2	0	0	0	2	0	0	2	0	0	0
G10048.5	14	-	1998	5	novel_in_catalog	ENSMUSG00000021891	novel	2762	6	coding	190	573	273	845	31215778	31197332	FALSE	TRUE	TRUE	Full	2	20	3.23728	0.0366697	F	0	0	0	0	0	2	0	0	0	0	0	0	0	0	0	0	0	0	0	0	0	0	0	0
G10048.8	14	-	3927	6	full-splice_match	ENSMUSG00000021891	ENSMUST00000055303	3946	6	coding	282	849	267	1115	31215778	31201592	FALSE	TRUE	TRUE	Full	5	20	3.71124	0.0420384	F	0	2	3	0	0	0	0	2	0	0	2	2	0	0	0	0	0	0	0	0	0	0	0	0
G10049.2	14	+	3910	6	full-splice_match	ENSMUSG00000021890	ENSMUST00000022446	4918	6	coding	268	807	161	967	31217226	31228574	FALSE	TRUE	FALSE	Full	1	3	3.1072	0.167412	F	0	0	0	0	0	0	0	0	0	0	0	0	0	0	0	0	0	0	0	0	0	0	0	0
G10049.3	14	+	4028	6	full-splice_match	ENSMUSG00000021890	ENSMUST00000022446	4918	6	coding	268	807	161	967	31217226	31228574	FALSE	TRUE	TRUE	Full	43	3	12.31	0.663245	T	13	13	12	20	4	6	7	4	12	10	26	21	10	19	8	0	3	2	0	3	0	2	6	2
G10049.7	14	+	3770	5	novel_in_catalog	ENSMUSG00000021890	novel	4918	6	coding	120	363	94	456	31217226	31226271	TRUE	TRUE	TRUE	Full	1	3	3.14305	0.169344	F	0	0	0	0	0	0	0	0	0	0	0	0	0	0	0	0	0	0	0	0	0	0	0	0
G10050.3	14	-	2690	17	full-splice_match	ENSMUSG00000057606	ENSMUST00000150054	2867	17	coding	446	1341	26	1366	31279821	31246367	FALSE	TRUE	TRUE	Full	1	2	4.79631	0.615156	T	0	0	0	0	0	0	0	0	0	0	0	0	0	0	0	0	0	3	0	0	0	0	0	0
G10050.4	14	-	2788	17	full-splice_match	ENSMUSG00000057606	ENSMUST00000112027	2837	17	coding	457	1374	97	1470	31299205	31246367	FALSE	TRUE	TRUE	Full	1	2	3.00059	0.384844	F	0	0	0	2	0	0	0	0	0	0	0	0	0	0	0	0	0	0	0	0	0	0	0	0
G10051.2	14	-	1969	17	full-splice_match	ENSMUSG00000021884	ENSMUST00000022437	2644	17	coding	581	1746	68	1813	31362835	31329968	FALSE	TRUE	TRUE	Full	47	3	13.2014	0.643015	T	5	4	6	10	7	11	12	5	7	8	11	8	4	9	5	6	9	10	8	13	11	5	12	3
G10051.3	14	-	1929	17	novel_in_catalog	ENSMUSG00000021884	novel	2644	17	coding	572	1719	55	1773	31363185	31329968	FALSE	TRUE	TRUE	Full	4	3	4.04085	0.196822	F	0	0	0	0	0	0	0	0	2	3	0	0	0	0	0	0	0	0	0	0	0	0	0	0
G10051.4	14	-	1889	6	novel_not_in_catalog	ENSMUSG00000021884	novel	918	6	coding	162	489	404	892	31362835	31353514	FALSE	TRUE	TRUE	Full	2	3	3.28824	0.160163	F	0	0	0	0	0	0	0	0	0	0	0	0	0	0	0	0	0	0	0	0	0	0	0	0
G10053.1	14	+	2030	4	novel_not_in_catalog	ENSMUSG00000021900	novel	2324	4	coding	412	1239	520	1758	31387923	31389870	FALSE	TRUE	TRUE	Full	1	5	2.95845	0.0334006	F	0	0	0	0	0	0	0	0	0	0	0	0	0	0	0	0	0	0	0	0	0	0	0	0
G10053.2	14	+	2635	3	incomplete-splice_match	ENSMUSG00000021900	ENSMUST00000090147	2324	4	coding	383	1152	1209	2360	31388719	31389870	FALSE	TRUE	TRUE	Full	1	5	5.51785	0.0622959	F	0	0	0	0	0	0	0	0	0	0	0	0	0	0	0	0	0	0	0	0	0	0	0	0
G10053.3	14	+	1802	4	novel_not_in_catalog	ENSMUSG00000021900	novel	2324	4	coding	412	1239	285	1523	31387923	31389870	FALSE	TRUE	TRUE	Full	2	5	4.25611	0.048051	F	0	0	0	0	0	0	0	0	0	0	0	3	0	0	0	0	0	0	0	0	0	0	0	0
G10053.4	14	+	1925	4	full-splice_match	ENSMUSG00000021900	ENSMUST00000090147	2324	4	coding	520	1563	85	1647	31384043	31389870	FALSE	TRUE	TRUE	Full	48	5	70.2092	0.792655	T	48	60	48	56	28	33	31	22	77	50	73	47	33	51	47	21	42	54	21	40	41	38	69	39
G10053.5	14	+	1663	3	full-splice_match	ENSMUSG00000021900	ENSMUST00000128014	689	3	coding	412	1239	153	1391	31387923	31389870	FALSE	TRUE	TRUE	Full	35	5	5.63317	0.0635979	F	3	4	2	4	0	0	5	7	2	3	2	3	3	6	3	0	2	4	5	5	5	2	2	3
G10062.1	14	-	3042	3	full-splice_match	ENSMUSG00000021905	ENSMUST00000067955	2953	3	non_coding	NA	NA	NA	NA	NA	NA	NA	TRUE	TRUE	Full	3	28	3.72204	0.0228777	F	0	0	0	3	0	0	0	0	0	0	0	0	0	0	0	0	0	0	0	0	0	0	0	0
G10062.10	14	-	3102	2	full-splice_match	ENSMUSG00000021905	ENSMUST00000144149	751	2	non_coding	NA	NA	NA	NA	NA	NA	NA	TRUE	TRUE	Full	10	28	3.57496	0.0219736	F	2	2	2	3	0	2	0	0	0	2	0	0	0	0	0	0	3	0	0	0	0	0	2	0
G10062.11	14	-	2853	2	full-splice_match	ENSMUSG00000021905	ENSMUST00000124303	809	2	non_coding	NA	NA	NA	NA	NA	NA	NA	TRUE	TRUE	Full	42	28	13.2023	0.0811486	F	9	6	7	17	9	10	9	6	5	4	7	15	4	7	3	2	10	8	0	7	9	7	14	0
G10062.12	14	-	2102	3	full-splice_match	ENSMUSG00000021905	ENSMUST00000067955	2953	3	non_coding	NA	NA	NA	NA	NA	NA	NA	TRUE	FALSE	Full	4	28	3.86297	0.0237439	F	0	0	0	0	2	0	3	2	0	0	0	0	0	0	0	0	0	0	0	0	0	2	0	0
G10062.13	14	-	2000	2	full-splice_match	ENSMUSG00000021905	ENSMUST00000124303	809	2	non_coding	NA	NA	NA	NA	NA	NA	NA	TRUE	FALSE	Full	1	28	3.15622	0.0193998	F	0	0	0	0	0	0	0	0	0	0	0	0	0	0	0	0	0	0	0	0	0	0	0	0
G10062.14	14	-	2006	3	full-splice_match	ENSMUSG00000021905	ENSMUST00000067955	2953	3	non_coding	NA	NA	NA	NA	NA	NA	NA	TRUE	TRUE	Full	16	28	4.43706	0.0272725	F	0	2	0	0	2	0	0	2	2	3	3	0	0	3	2	0	5	0	0	0	0	2	2	0
G10062.15	14	-	1961	2	full-splice_match	ENSMUSG00000021905	ENSMUST00000124303	809	2	non_coding	NA	NA	NA	NA	NA	NA	NA	TRUE	TRUE	Full	5	28	4.24666	0.0261022	F	0	0	0	0	0	0	0	2	0	0	0	0	0	2	0	0	0	0	0	0	0	0	0	0
G10062.16	14	-	1963	3	full-splice_match	ENSMUSG00000021905	ENSMUST00000067955	2953	3	non_coding	NA	NA	NA	NA	NA	NA	NA	TRUE	TRUE	Full	20	28	11.1391	0.0684668	F	10	12	14	0	8	3	6	3	0	0	0	0	0	0	0	0	0	25	6	8	10	0	0	13
G10062.17	14	-	2085	3	full-splice_match	ENSMUSG00000021905	ENSMUST00000112001	3079	3	non_coding	NA	NA	NA	NA	NA	NA	NA	TRUE	TRUE	Full	2	28	3.12991	0.0192381	F	0	2	2	0	0	0	0	0	0	0	0	0	0	0	0	0	0	0	0	0	0	0	0	0
G10062.18	14	-	1889	2	full-splice_match	ENSMUSG00000021905	ENSMUST00000124303	809	2	non_coding	NA	NA	NA	NA	NA	NA	NA	TRUE	TRUE	Full	13	28	6.81842	0.0419097	F	2	2	2	0	3	0	0	0	0	0	0	0	0	0	0	0	0	10	8	5	7	0	0	5
G10062.19	14	-	879	3	novel_not_in_catalog	ENSMUSG00000021905	novel	751	2	non_coding	NA	NA	NA	NA	NA	NA	NA	TRUE	TRUE	Full	1	28	3.36102	0.0206586	F	0	0	0	0	0	0	0	0	0	0	0	0	0	0	0	0	0	0	0	0	0	0	0	0
G10062.2	14	-	1563	3	novel_not_in_catalog	ENSMUSG00000021905	novel	1057	4	non_coding	NA	NA	NA	NA	NA	NA	NA	TRUE	TRUE	Full	2	28	3.376	0.0207507	F	0	0	0	0	0	0	2	0	0	0	0	0	0	0	0	0	0	0	0	0	2	0	0	0
G10062.21	14	-	2188	2	novel_not_in_catalog	ENSMUSG00000021905	novel	751	2	non_coding	NA	NA	NA	NA	NA	NA	NA	TRUE	TRUE	Full	7	28	4.62526	0.0284293	F	0	0	2	0	0	0	0	0	0	0	0	0	0	0	0	0	0	0	0	0	0	0	0	0
G10062.22	14	-	941	3	novel_not_in_catalog	ENSMUSG00000021905	novel	751	2	non_coding	NA	NA	NA	NA	NA	NA	NA	TRUE	TRUE	Full	3	28	3.54541	0.021792	F	0	0	0	0	0	0	0	0	0	0	0	0	0	0	0	0	0	0	0	0	0	0	0	2
G10062.25	14	-	1612	2	novel_not_in_catalog	ENSMUSG00000021905	novel	751	2	non_coding	NA	NA	NA	NA	NA	NA	NA	TRUE	TRUE	Full	3	28	3.3633	0.0206726	F	0	0	0	0	2	0	0	0	0	0	0	0	0	0	0	0	0	0	0	0	0	0	0	0
G10062.26	14	-	912	3	novel_not_in_catalog	ENSMUSG00000021905	novel	751	2	non_coding	NA	NA	NA	NA	NA	NA	NA	TRUE	TRUE	Full	1	28	3.61348	0.0222104	F	0	0	0	0	0	0	0	0	0	0	0	2	0	0	0	0	0	0	0	0	0	0	0	0
G10062.28	14	-	477	3	novel_not_in_catalog	ENSMUSG00000021905	novel	2953	3	non_coding	NA	NA	NA	NA	NA	NA	NA	TRUE	TRUE	Full	1	28	3.78186	0.0232453	F	0	0	0	0	0	0	0	0	0	0	0	0	0	0	0	2	0	0	0	0	0	0	0	0
G10062.29	14	-	647	3	full-splice_match	ENSMUSG00000021905	ENSMUST00000067955	2953	3	non_coding	NA	NA	NA	NA	NA	NA	NA	TRUE	TRUE	Full	48	28	18.0144	0.110726	F	9	8	11	10	10	6	6	12	8	9	11	10	9	15	11	18	6	7	17	16	19	5	5	3
G10062.3	14	-	1062	4	full-splice_match	ENSMUSG00000021905	ENSMUST00000022461	1057	4	non_coding	NA	NA	NA	NA	NA	NA	NA	TRUE	TRUE	Full	2	28	3.26869	0.0200911	F	0	0	0	0	2	0	0	0	0	0	0	0	0	0	0	0	0	0	2	0	0	0	0	0
G10062.30	14	-	778	3	full-splice_match	ENSMUSG00000021905	ENSMUST00000112001	3079	3	non_coding	NA	NA	NA	NA	NA	NA	NA	TRUE	TRUE	Full	7	28	3.71562	0.0228382	F	0	0	2	0	0	0	0	2	0	0	0	0	0	0	0	2	2	0	3	0	3	0	0	0
G10062.31	14	-	771	2	full-splice_match	ENSMUSG00000021905	ENSMUST00000144149	751	2	non_coding	NA	NA	NA	NA	NA	NA	NA	TRUE	TRUE	Full	44	28	8.44572	0.0519119	F	4	3	2	8	5	2	0	9	5	4	0	6	2	6	5	16	3	0	10	6	6	5	4	2
G10062.32	14	-	576	2	full-splice_match	ENSMUSG00000021905	ENSMUST00000124303	809	2	non_coding	NA	NA	NA	NA	NA	NA	NA	TRUE	TRUE	Full	34	28	7.06542	0.0434278	F	3	3	2	0	2	0	3	3	0	0	0	2	0	2	2	2	0	0	2	3	0	0	0	2
G10062.33	14	-	640	3	full-splice_match	ENSMUSG00000021905	ENSMUST00000167796	591	3	coding	18	57	278	334	31805194	31805138	FALSE	TRUE	TRUE	Full	1	28	3.65303	0.0224535	F	0	0	0	0	0	0	0	0	0	0	0	0	0	0	0	0	0	0	0	0	0	0	0	0
G10062.4	14	-	3136	3	full-splice_match	ENSMUSG00000021905	ENSMUST00000112001	3079	3	non_coding	NA	NA	NA	NA	NA	NA	NA	TRUE	TRUE	Full	4	28	3.8218	0.0234908	F	3	0	0	0	2	0	0	0	0	0	0	2	0	0	0	0	0	0	0	0	0	0	2	0
G10062.5	14	-	1656	4	novel_not_in_catalog	ENSMUSG00000021905	novel	2953	3	non_coding	NA	NA	NA	NA	NA	NA	NA	TRUE	TRUE	Full	3	28	3.9839	0.0244872	F	0	0	0	0	0	0	0	3	0	0	0	2	0	0	0	0	0	0	0	0	2	0	0	0
G10062.6	14	-	1000	3	novel_in_catalog	ENSMUSG00000021905	novel	1057	4	non_coding	NA	NA	NA	NA	NA	NA	NA	TRUE	TRUE	Full	2	28	3.01681	0.0185429	F	0	0	0	0	0	0	0	0	0	0	0	0	0	0	0	0	0	0	2	2	0	0	0	0
G10062.8	14	-	2928	3	full-splice_match	ENSMUSG00000021905	ENSMUST00000067955	2953	3	non_coding	NA	NA	NA	NA	NA	NA	NA	TRUE	TRUE	Full	44	28	19.7768	0.121559	T	19	28	15	25	24	23	11	6	20	28	21	24	9	14	10	8	17	6	10	12	12	9	19	3
G10062.9	14	-	2904	3	full-splice_match	ENSMUSG00000021905	ENSMUST00000167796	591	3	non_coding	NA	NA	NA	NA	NA	NA	NA	TRUE	TRUE	Full	1	28	4.97522	0.0305803	F	3	0	0	0	0	0	0	0	0	0	0	0	0	0	0	0	0	0	0	0	0	0	0	0
G10063.1	14	+	2136	9	novel_in_catalog	ENSMUSG00000021906	novel	2376	8	coding	311	936	411	1346	31813601	31824368	FALSE	TRUE	TRUE	Full	1	18	2.75893	0.0311021	F	0	0	0	0	0	0	0	0	0	0	0	0	0	0	0	0	0	0	0	0	0	0	0	0
G10063.10	14	+	1937	8	full-splice_match	ENSMUSG00000021906	ENSMUST00000022462	2376	8	coding	311	936	301	1236	31813601	31824368	FALSE	TRUE	TRUE	Full	47	18	12.8103	0.144414	F	8	14	7	9	13	5	10	7	7	8	10	12	5	11	8	4	10	12	10	9	10	7	8	10
G10063.11	14	+	2028	8	full-splice_match	ENSMUSG00000021906	ENSMUST00000022462	2376	8	coding	311	936	301	1236	31813601	31824368	FALSE	TRUE	TRUE	Full	46	18	15.7122	0.177128	T	14	12	8	13	12	4	3	3	15	16	8	10	5	21	21	4	6	7	6	5	6	9	3	8
G10063.12	14	+	1794	8	novel_in_catalog	ENSMUSG00000021906	novel	2376	8	coding	157	474	301	774	31813601	31821535	TRUE	TRUE	TRUE	Full	2	18	3.24428	0.0365736	F	0	0	0	0	0	0	0	0	2	0	0	0	0	0	0	0	0	0	0	0	0	0	0	0
G10063.13	14	+	1832	7	novel_in_catalog	ENSMUSG00000021906	novel	2376	8	non_coding	NA	NA	NA	NA	NA	NA	NA	TRUE	TRUE	Full	5	18	3.87769	0.0437143	F	0	0	0	0	0	0	2	0	0	0	2	0	0	0	0	0	0	0	0	4	0	2	2	0
G10063.14	14	+	2099	8	novel_not_in_catalog	ENSMUSG00000021906	novel	2376	8	coding	249	750	560	1309	31817325	31824368	FALSE	TRUE	TRUE	Full	1	18	2.79612	0.0315215	F	0	0	0	0	0	0	0	0	0	0	0	0	0	2	0	0	0	0	0	0	0	0	0	0
G10063.15	14	+	1682	7	novel_in_catalog	ENSMUSG00000021906	novel	2376	8	coding	230	693	288	980	31813601	31824368	FALSE	TRUE	TRUE	Full	2	18	4.43241	0.0499678	F	0	0	0	0	0	0	0	0	0	0	0	0	0	0	0	0	0	0	0	0	0	0	0	0
G10063.16	14	+	2039	9	novel_not_in_catalog	ENSMUSG00000021906	novel	2376	8	coding	230	693	555	1247	31817325	31824368	FALSE	TRUE	TRUE	Full	1	18	3.1072	0.0350283	F	0	0	0	0	0	0	0	0	0	0	0	0	0	0	0	0	0	0	0	0	0	0	0	0
G10063.17	14	+	1730	7	novel_in_catalog	ENSMUSG00000021906	novel	2376	8	non_coding	NA	NA	NA	NA	NA	NA	NA	TRUE	TRUE	Full	1	18	3.50876	0.0395552	F	0	0	0	0	0	0	0	2	0	0	0	0	0	0	0	0	0	0	0	0	0	0	0	0
G10063.18	14	+	1886	7	novel_in_catalog	ENSMUSG00000021906	novel	2376	8	coding	250	753	339	1091	31817325	31824368	FALSE	TRUE	TRUE	Full	1	18	5.6464	0.0636535	F	0	0	0	0	0	0	0	0	0	0	0	0	0	0	0	0	0	0	0	0	0	0	0	0
G10063.2	14	+	1844	8	novel_in_catalog	ENSMUSG00000021906	novel	2376	8	coding	311	936	206	1141	31813601	31824368	FALSE	TRUE	TRUE	Full	4	18	4.48705	0.0505838	F	0	0	0	0	0	0	0	0	2	0	0	0	0	0	0	0	0	0	0	0	0	0	0	0
G10063.3	14	+	1933	8	novel_in_catalog	ENSMUSG00000021906	novel	2376	8	coding	311	936	206	1141	31813601	31824368	FALSE	TRUE	TRUE	Full	7	18	4.52877	0.0510541	F	0	0	0	0	0	0	0	0	0	0	0	0	0	0	2	0	0	2	0	0	0	0	0	0
G10063.4	14	+	1819	7	novel_in_catalog	ENSMUSG00000021906	novel	2376	8	coding	230	693	335	1027	31813601	31824368	FALSE	TRUE	TRUE	Full	4	18	5.10172	0.0575132	F	2	0	0	0	0	0	0	0	0	0	0	0	0	0	0	0	0	0	0	0	0	0	0	0
G10063.5	14	+	2076	8	novel_in_catalog	ENSMUSG00000021906	novel	2376	8	coding	311	936	348	1283	31813601	31824368	FALSE	TRUE	TRUE	Full	1	18	3.49114	0.0393566	F	0	0	0	0	0	0	0	0	0	0	0	0	0	0	0	0	0	0	0	0	0	0	0	0
G10063.6	14	+	2065	9	novel_not_in_catalog	ENSMUSG00000021906	novel	2376	8	coding	250	753	612	1364	31817325	31824368	FALSE	TRUE	TRUE	Full	1	18	3.36102	0.0378897	F	0	0	0	0	0	0	0	0	0	0	0	0	0	0	0	0	0	0	0	0	0	0	0	0
G10063.7	14	+	1997	8	novel_in_catalog	ENSMUSG00000021906	novel	2376	8	coding	291	876	332	1207	31813601	31824368	FALSE	TRUE	TRUE	Full	2	18	2.97643	0.0335542	F	0	0	0	0	0	0	0	0	0	0	0	0	0	0	0	0	0	0	0	0	0	2	0	0
G10063.8	14	+	1941	7	novel_in_catalog	ENSMUSG00000021906	novel	2376	8	non_coding	NA	NA	NA	NA	NA	NA	NA	TRUE	TRUE	Full	7	18	3.39695	0.0382948	F	0	0	0	0	0	2	2	0	0	0	0	0	0	0	2	0	0	2	0	2	2	0	0	2
G10063.9	14	+	1895	7	novel_in_catalog	ENSMUSG00000021906	novel	2376	8	coding	250	753	440	1192	31817325	31824368	FALSE	TRUE	TRUE	Full	1	18	3.46801	0.0390958	F	0	0	0	0	0	0	0	0	0	0	0	0	0	0	0	0	0	0	0	0	0	0	0	0
G10065.1	14	+	2522	10	full-splice_match	ENSMUSG00000056234	ENSMUST00000163336	4065	10	coding	625	1878	152	2029	31892719	31899785	FALSE	TRUE	TRUE	Full	1	15	3.00059	0.0161144	F	0	0	0	2	0	0	0	0	0	0	0	0	0	0	0	0	0	0	0	0	0	0	0	0
G10065.10	14	+	3762	8	novel_in_catalog	ENSMUSG00000056234	novel	4065	10	coding	459	1380	961	2340	31895376	31899785	FALSE	TRUE	TRUE	Full	1	15	3.61348	0.0194058	F	0	0	0	0	0	0	0	0	0	0	0	2	0	0	0	0	0	0	0	0	0	0	0	0
G10065.12	14	+	3244	9	novel_in_catalog	ENSMUSG00000056234	novel	4065	10	coding	530	1593	231	1823	31894567	31899785	FALSE	TRUE	TRUE	Full	1	15	6.72262	0.0361032	F	0	0	0	0	4	0	0	0	0	0	0	0	0	0	0	0	0	0	0	0	0	0	0	0
G10065.15	14	+	3393	10	full-splice_match	ENSMUSG00000056234	ENSMUST00000163336	4065	10	coding	625	1878	95	1972	31892719	31899785	FALSE	TRUE	TRUE	Full	38	15	124.565	0.668964	T	68	100	104	134	132	152	94	34	104	139	114	105	49	108	69	32	33	53	27	82	84	47	63	26
G10065.16	14	+	3509	10	full-splice_match	ENSMUSG00000056234	ENSMUST00000163336	4065	10	coding	625	1878	95	1972	31892719	31899785	FALSE	TRUE	TRUE	Full	10	15	4.31265	0.0231606	F	0	3	0	0	0	3	0	0	2	2	2	0	0	0	4	0	0	0	0	3	0	0	2	0
G10065.17	14	+	4421	10	full-splice_match	ENSMUSG00000056234	ENSMUST00000163336	4065	10	coding	625	1878	95	1972	31892719	31899785	FALSE	TRUE	TRUE	Full	4	15	3.33895	0.0179315	F	2	0	0	0	0	2	0	0	2	0	0	0	0	0	0	0	0	0	0	0	0	0	0	0
G10065.2	14	+	3386	10	full-splice_match	ENSMUSG00000056234	ENSMUST00000163336	4065	10	coding	625	1878	152	2029	31892719	31899785	FALSE	TRUE	TRUE	Full	3	15	3.2766	0.0175966	F	0	0	0	2	0	0	0	0	0	0	0	0	0	0	2	0	0	0	0	0	0	0	0	0
G10065.20	14	+	3418	11	novel_not_in_catalog	ENSMUSG00000056234	novel	3343	10	coding	633	1902	96	1997	31888218	31899785	FALSE	TRUE	TRUE	Full	1	15	4.73433	0.0254253	F	0	0	0	0	0	0	0	0	0	0	0	0	0	0	0	0	0	0	0	0	0	0	0	0
G10065.23	14	+	3344	10	full-splice_match	ENSMUSG00000056234	ENSMUST00000111994	3343	10	coding	625	1878	46	1923	31892719	31899785	FALSE	TRUE	TRUE	Full	10	15	9.16237	0.0492056	F	0	0	4	0	0	0	0	5	10	8	0	0	0	0	0	0	4	0	0	0	0	0	0	0
G10065.26	14	+	2731	4	incomplete-splice_match	ENSMUSG00000056234	ENSMUST00000111994	3343	10	coding	188	567	744	1310	31898493	31899785	FALSE	TRUE	TRUE	Full	2	15	3.27931	0.0176112	F	0	0	0	0	0	2	0	0	0	0	0	0	0	0	0	0	0	0	2	0	0	0	0	0
G10065.27	14	+	2571	3	incomplete-splice_match	ENSMUSG00000056234	ENSMUST00000111994	3343	10	coding	188	567	584	1150	31898493	31899785	FALSE	TRUE	TRUE	Full	10	15	4.77855	0.0256627	F	0	2	0	0	0	4	0	4	0	0	2	0	0	0	0	0	2	0	5	0	3	0	2	2
G10065.29	14	+	1501	2	full-splice_match	ENSMUSG00000056234	ENSMUST00000228779	661	2	non_coding	NA	NA	NA	NA	NA	NA	NA	TRUE	TRUE	Full	1	15	3.69006	0.0198171	F	0	0	0	0	0	0	0	0	0	0	0	0	0	0	0	0	0	0	0	0	0	0	0	0
G10065.5	14	+	4319	10	full-splice_match	ENSMUSG00000056234	ENSMUST00000163336	4065	10	coding	625	1878	120	1997	31892719	31899785	FALSE	TRUE	TRUE	Full	1	15	3.36102	0.01805	F	0	0	0	0	0	0	0	0	0	0	0	0	0	0	0	0	0	0	0	0	0	0	0	0
G10065.6	14	+	3485	10	full-splice_match	ENSMUSG00000056234	ENSMUST00000163336	4065	10	coding	625	1878	115	1992	31892719	31899785	FALSE	TRUE	TRUE	Full	3	15	3.33221	0.0178953	F	0	0	0	2	0	2	0	0	0	0	0	2	0	0	0	0	0	0	0	0	0	0	0	0
G10065.8	14	+	2163	10	full-splice_match	ENSMUSG00000056234	ENSMUST00000163336	4065	10	coding	625	1878	110	1987	31892719	31899785	FALSE	TRUE	TRUE	Full	26	15	5.03811	0.0270567	F	2	3	3	2	5	4	3	0	4	0	2	4	3	2	2	3	0	0	2	0	0	3	0	2
G10066.10	14	-	1053	6	novel_in_catalog	ENSMUSG00000013701	novel	1173	7	coding	117	354	341	694	31915427	31902512	FALSE	TRUE	TRUE	Full	4	13	4.82677	0.0135581	F	0	0	0	0	0	0	0	0	0	0	0	0	0	0	0	0	0	0	0	0	0	0	0	0
G10066.11	14	-	3114	6	novel_in_catalog	ENSMUSG00000013701	novel	1173	7	coding	115	348	124	471	31923705	31915356	TRUE	TRUE	TRUE	Full	3	13	2.98453	0.00838338	F	0	0	0	0	0	0	0	0	0	0	0	0	0	0	0	0	0	0	0	0	0	0	0	0
G10066.12	14	-	1081	7	full-splice_match	ENSMUSG00000013701	ENSMUST00000013845	1173	7	coding	209	630	124	753	31923705	31902512	FALSE	TRUE	TRUE	Full	21	13	43.4083	0.121931	F	0	0	2	0	3	0	2	2	2	0	0	3	0	0	0	5	0	0	0	0	2	2	0	0
G10066.13	14	-	1023	7	full-splice_match	ENSMUSG00000013701	ENSMUST00000013845	1173	7	coding	209	630	124	753	31923705	31902512	FALSE	TRUE	TRUE	Full	1	13	3.50876	0.00985591	F	0	0	0	0	0	0	0	2	0	0	0	0	0	0	0	0	0	0	0	0	0	0	0	0
G10066.14	14	-	913	7	full-splice_match	ENSMUSG00000013701	ENSMUST00000013845	1173	7	coding	209	630	124	753	31923705	31902512	FALSE	TRUE	FALSE	Full	1	13	3.65303	0.0102612	F	0	0	0	0	0	0	0	0	0	0	0	0	0	0	0	0	0	0	0	0	0	0	0	0
G10066.15	14	-	881	7	full-splice_match	ENSMUSG00000013701	ENSMUST00000013845	1173	7	coding	209	630	124	753	31923705	31902512	FALSE	TRUE	FALSE	Full	1	13	2.85755	0.00802669	F	0	0	0	0	0	0	0	0	0	0	0	0	0	0	0	0	0	0	0	2	0	0	0	0
G10066.16	14	-	845	7	full-splice_match	ENSMUSG00000013701	ENSMUST00000013845	1173	7	coding	209	630	124	753	31923705	31902512	FALSE	TRUE	TRUE	Full	3	13	3.57073	0.01003	F	0	0	0	0	0	0	0	2	2	0	0	0	0	0	0	0	0	0	0	0	0	0	0	0
G10066.2	14	-	1046	6	full-splice_match	ENSMUSG00000013701	ENSMUST00000163379	682	6	coding	117	354	306	659	31915427	31902512	FALSE	TRUE	TRUE	Full	1	13	4.59969	0.0129203	F	0	0	0	0	0	0	0	0	0	0	0	0	0	0	0	0	0	0	0	0	0	3	0	0
G10066.3	14	-	998	5	novel_in_catalog	ENSMUSG00000013701	novel	682	6	coding	104	315	314	628	31915388	31902512	FALSE	TRUE	TRUE	Full	1	13	2.79612	0.00785415	F	0	0	0	0	0	0	0	0	0	0	0	0	0	2	0	0	0	0	0	0	0	0	0	0
G10066.5	14	-	1043	6	novel_in_catalog	ENSMUSG00000013701	novel	1173	7	coding	99	300	374	673	31915824	31902512	FALSE	TRUE	TRUE	Full	1	13	4.13839	0.0116245	F	0	0	0	0	0	0	0	0	0	0	0	0	0	0	0	0	0	0	0	0	0	0	0	0
G10066.6	14	-	579	2	incomplete-splice_match	ENSMUSG00000013701	ENSMUST00000168139	875	4	non_coding	NA	NA	NA	NA	NA	NA	NA	TRUE	TRUE	Full	1	13	3.50876	0.00985591	F	0	0	0	0	0	0	0	2	0	0	0	0	0	0	0	0	0	0	0	0	0	0	0	0
G10066.7	14	-	885	6	incomplete-splice_match	ENSMUSG00000013701	ENSMUST00000013845	1173	7	coding	171	516	4	519	31920976	31902512	FALSE	TRUE	TRUE	Full	2	13	3.54802	0.00996618	F	2	0	0	0	0	0	0	0	0	0	0	0	0	0	0	0	0	0	0	0	0	0	0	0
G10066.9	14	-	1112	7	full-splice_match	ENSMUSG00000013701	ENSMUST00000013845	1173	7	coding	209	630	124	753	31923705	31902512	FALSE	TRUE	TRUE	Full	44	13	272.605	0.765732	T	103	119	171	170	199	136	137	240	110	155	123	160	135	240	204	255	116	125	253	190	163	134	91	111
G10067.1	14	+	4097	18	novel_in_catalog	ENSMUSG00000021911	novel	4413	18	coding	854	2565	628	3192	31930703	32018277	FALSE	TRUE	TRUE	Full	1	3	2.95845	0.233774	F	0	0	0	0	0	0	0	0	0	0	0	0	0	0	0	0	0	0	0	0	0	0	0	0
G10067.2	14	+	4058	18	full-splice_match	ENSMUSG00000021911	ENSMUST00000022470	4413	18	coding	961	2886	276	3161	31924203	32018277	FALSE	TRUE	TRUE	Full	18	3	6.04367	0.477566	T	0	0	2	3	0	0	2	0	2	2	0	0	0	0	0	0	0	2	0	0	0	4	5	0
G10067.7	14	+	1246	3	incomplete-splice_match	ENSMUSG00000021911	ENSMUST00000171871	587	5	coding	61	186	156	341	32017230	32018277	FALSE	TRUE	TRUE	Full	1	3	3.65303	0.28866	F	0	0	0	0	0	0	0	0	0	0	0	0	0	0	0	0	0	0	0	0	0	0	0	0
G10068.1	14	+	1258	2	full-splice_match	ENSMUSG00000115813	ENSMUST00000227042	1870	2	non_coding	NA	NA	NA	NA	NA	NA	NA	TRUE	TRUE	Full	5	2	4.36653	0.586772	T	0	0	0	0	0	0	0	0	0	0	0	0	0	0	2	0	3	0	0	3	2	4	0	0
G10068.2	14	+	1871	2	full-splice_match	ENSMUSG00000115813	ENSMUST00000227042	1870	2	non_coding	NA	NA	NA	NA	NA	NA	NA	TRUE	TRUE	Full	1	2	3.07509	0.413228	F	0	0	0	0	0	0	0	0	0	0	0	0	0	0	0	0	0	0	0	0	2	0	0	0
G1007.101	1	+	1580	7	novel_in_catalog	ENSMUSG00000026150	novel	2087	11	coding	292	879	31	909	82706977	82729437	FALSE	TRUE	TRUE	Full	4	78	3.71701	0.00307608	F	0	0	0	0	0	0	0	0	0	0	0	0	0	0	0	2	0	0	2	3	0	0	0	0
G1007.103	1	+	1151	4	incomplete-splice_match	ENSMUSG00000026150	ENSMUST00000160972	1358	5	coding	89	270	209	478	82713176	82729437	FALSE	TRUE	TRUE	Full	1	78	3.78186	0.00312975	F	0	0	0	0	0	0	0	0	0	0	0	0	0	0	0	2	0	0	0	0	0	0	0	0
G1007.105	1	+	1198	5	incomplete-splice_match	ENSMUSG00000026150	ENSMUST00000078332	1894	9	coding	162	489	39	527	82713176	82729437	FALSE	TRUE	TRUE	Full	7	78	4.3499	0.00359984	F	0	0	0	0	0	0	0	0	0	0	0	0	0	0	0	0	0	0	0	3	2	0	0	0
G1007.106	1	+	1227	6	novel_in_catalog	ENSMUSG00000026150	novel	651	5	coding	173	522	35	556	82713176	82729437	FALSE	TRUE	TRUE	Full	1	78	4.28632	0.00354722	F	0	0	0	0	0	0	0	0	0	0	0	0	0	0	0	0	0	0	0	3	0	0	0	0
G1007.107	1	+	1020	4	incomplete-splice_match	ENSMUSG00000026150	ENSMUST00000073025	1706	8	coding	109	330	20	349	82713176	82729437	FALSE	TRUE	TRUE	Full	1	78	4.19992	0.00347572	F	0	0	0	0	0	0	0	0	0	0	0	0	0	0	0	0	0	0	0	0	0	0	0	0
G1007.108	1	+	1083	6	novel_not_in_catalog	ENSMUSG00000026150	novel	651	5	coding	134	405	7	411	82713176	82729437	FALSE	TRUE	TRUE	Full	1	78	3.14531	0.00260296	F	0	0	0	0	0	0	0	0	0	0	0	0	0	0	0	0	0	0	0	0	0	0	0	0
G1007.11	1	+	1181	10	novel_in_catalog	ENSMUSG00000026150	novel	1894	9	coding	279	837	345	1181	82706977	82729362	FALSE	TRUE	TRUE	Full	4	78	3.19073	0.00264055	F	0	0	0	0	0	0	0	0	0	0	0	0	0	0	0	2	0	0	0	2	0	0	0	0
G1007.111	1	+	1017	5	full-splice_match	ENSMUSG00000026150	ENSMUST00000160632	651	5	coding	55	168	179	346	82728290	82729437	FALSE	TRUE	TRUE	Full	2	78	4.42246	0.00365989	F	0	0	0	0	0	0	0	0	0	0	0	0	0	0	0	0	0	0	2	0	0	0	0	0
G1007.114	1	+	1953	3	full-splice_match	ENSMUSG00000026150	ENSMUST00000162794	607	3	non_coding	NA	NA	NA	NA	NA	NA	NA	FALSE	TRUE	Full	25	78	4.96547	0.00410927	F	3	3	0	2	2	0	0	4	5	0	2	2	2	2	2	0	0	0	6	0	0	0	0	2
G1007.115	1	+	1571	2	full-splice_match	ENSMUSG00000026150	ENSMUST00000162573	2360	2	non_coding	NA	NA	NA	NA	NA	NA	NA	FALSE	TRUE	Full	4	78	4.10219	0.00339484	F	0	0	0	0	0	0	0	0	0	0	0	0	0	0	0	2	0	3	3	0	0	2	0	0
G1007.12	1	+	1200	9	novel_in_catalog	ENSMUSG00000026150	novel	2087	11	coding	263	792	345	1136	82706977	82729437	FALSE	TRUE	TRUE	Full	2	78	3.95606	0.00327391	F	0	0	0	0	0	0	0	0	0	0	0	0	0	0	0	0	0	2	0	0	0	0	0	0
G1007.13	1	+	1583	6	novel_in_catalog	ENSMUSG00000026150	novel	1706	8	coding	127	384	345	728	82706977	82728273	TRUE	TRUE	TRUE	Full	8	78	4.11626	0.00340649	F	0	0	0	0	0	0	4	0	0	0	0	0	0	0	0	0	2	0	2	0	2	3	3	0
G1007.14	1	+	1706	9	novel_in_catalog	ENSMUSG00000026150	novel	1894	9	coding	173	522	514	1035	82713176	82729437	FALSE	TRUE	TRUE	Full	1	78	2.95845	0.00244832	F	0	0	0	0	0	0	0	0	0	0	0	0	0	0	0	0	0	0	0	0	0	0	0	0
G1007.15	1	+	1698	8	novel_in_catalog	ENSMUSG00000026150	novel	2087	11	coding	263	792	236	1027	82706977	82729437	FALSE	TRUE	TRUE	Full	3	78	4.25205	0.00351886	F	0	0	0	0	0	0	0	0	0	0	0	0	0	0	0	0	0	0	0	0	0	0	0	0
G1007.16	1	+	1963	10	novel_not_in_catalog	ENSMUSG00000026150	novel	1894	9	coding	291	876	417	1292	82706977	82729437	FALSE	TRUE	TRUE	Full	1	78	3.62379	0.00299893	F	0	0	0	0	0	0	0	0	0	0	0	0	0	0	0	0	0	0	0	0	0	0	0	0
G1007.17	1	+	1973	11	novel_not_in_catalog	ENSMUSG00000026150	novel	2087	11	coding	289	870	433	1302	82705922	82729437	FALSE	TRUE	TRUE	Full	2	78	3.10539	0.00256992	F	0	0	0	0	0	0	0	0	0	0	0	0	0	0	0	0	0	0	0	0	0	0	0	0
G1007.19	1	+	1577	9	novel_not_in_catalog	ENSMUSG00000026150	novel	1894	9	coding	134	405	502	906	82713176	82729437	FALSE	TRUE	TRUE	Full	1	78	3.3374	0.00276193	F	0	0	0	0	0	0	0	0	0	0	0	0	0	0	0	0	0	0	0	0	0	0	0	0
G1007.2	1	+	1733	8	novel_not_in_catalog	ENSMUSG00000026150	novel	1706	8	coding	233	702	361	1062	82706977	82729437	FALSE	TRUE	TRUE	Full	2	78	3.64852	0.0030194	F	0	2	0	0	0	0	0	0	0	0	0	0	0	0	0	0	0	0	0	0	0	0	0	0
G1007.21	1	+	1295	10	novel_in_catalog	ENSMUSG00000026150	novel	2087	11	coding	294	882	414	1295	82705922	82729362	FALSE	TRUE	TRUE	Full	1	78	3.46801	0.00287001	F	0	0	0	0	0	0	0	0	0	0	0	0	0	0	0	0	0	0	0	0	0	0	0	0
G1007.24	1	+	1915	10	novel_not_in_catalog	ENSMUSG00000026150	novel	1894	9	coding	162	489	756	1244	82713176	82729437	FALSE	TRUE	TRUE	Full	1	78	4.4542	0.00368616	F	0	0	0	0	0	0	0	0	0	0	0	0	0	0	0	0	0	0	0	0	0	0	0	0
G1007.25	1	+	1509	7	novel_not_in_catalog	ENSMUSG00000026150	novel	1706	8	coding	218	657	182	838	82706977	82729437	FALSE	TRUE	TRUE	Full	1	78	3.19754	0.00264618	F	0	0	0	0	0	0	0	0	0	0	0	0	0	0	0	0	0	2	0	0	0	0	0	0
G1007.29	1	+	2110	11	full-splice_match	ENSMUSG00000026150	ENSMUST00000162003	2087	11	coding	342	1029	411	1439	82705922	82729437	FALSE	TRUE	TRUE	Full	1	78	3.32437	0.00275115	F	0	0	0	0	0	0	0	0	0	0	0	0	0	0	0	0	0	0	0	0	0	0	0	0
G1007.3	1	+	1732	9	novel_not_in_catalog	ENSMUSG00000026150	novel	1894	9	coding	292	879	183	1061	82706977	82729437	FALSE	TRUE	TRUE	Full	1	78	3.31681	0.00274489	F	2	0	0	0	0	0	0	0	0	0	0	0	0	0	0	0	0	0	0	0	0	0	0	0
G1007.30	1	+	2068	11	novel_in_catalog	ENSMUSG00000026150	novel	2087	11	coding	328	987	411	1397	82705922	82729437	FALSE	TRUE	TRUE	Full	44	78	11.7793	0.00974816	F	7	5	8	4	7	4	4	3	5	10	4	6	3	6	10	0	0	9	7	9	8	12	9	5
G1007.31	1	+	1428	10	novel_in_catalog	ENSMUSG00000026150	novel	2087	11	coding	317	954	411	1364	82705922	82729437	FALSE	TRUE	TRUE	Full	3	78	3.31604	0.00274425	F	0	0	0	0	0	0	0	0	0	0	0	0	0	0	2	2	0	0	0	0	0	0	0	0
G1007.32	1	+	2035	10	novel_in_catalog	ENSMUSG00000026150	novel	2087	11	coding	317	954	411	1364	82705922	82729437	FALSE	TRUE	TRUE	Full	47	78	25.2273	0.0208773	F	9	27	9	19	15	16	15	0	6	12	18	8	6	12	32	9	22	24	15	18	29	24	12	14
G1007.33	1	+	1975	9	novel_in_catalog	ENSMUSG00000026150	novel	2087	11	coding	297	894	411	1304	82705922	82729437	FALSE	TRUE	TRUE	Full	6	78	3.50724	0.00290248	F	0	0	0	0	2	0	0	0	2	0	0	0	0	0	2	0	0	0	0	3	0	0	2	0
G1007.34	1	+	1816	8	novel_in_catalog	ENSMUSG00000026150	novel	2087	11	coding	244	735	411	1145	82705922	82729437	FALSE	TRUE	TRUE	Full	35	78	6.12761	0.00507102	F	2	4	0	2	3	0	5	0	4	3	0	2	2	3	6	2	5	2	7	4	6	10	2	6
G1007.35	1	+	1886	9	novel_in_catalog	ENSMUSG00000026150	novel	2087	11	coding	297	894	317	1210	82706977	82729437	FALSE	TRUE	TRUE	Full	1	78	3.092	0.00255884	F	0	0	0	0	0	0	0	0	0	0	0	0	0	0	0	0	0	0	0	0	0	0	0	0
G1007.38	1	+	1175	10	novel_not_in_catalog	ENSMUSG00000026150	novel	1894	9	coding	264	795	317	1111	82706977	82729437	FALSE	TRUE	TRUE	Full	1	78	3.36102	0.00278147	F	0	0	0	0	0	0	0	0	0	0	0	0	0	0	0	0	0	0	0	0	0	0	0	0
G1007.4	1	+	1912	9	novel_in_catalog	ENSMUSG00000026150	novel	2087	11	coding	264	795	447	1241	82705922	82729437	FALSE	TRUE	TRUE	Full	3	78	4.11671	0.00340686	F	0	0	0	0	0	0	0	0	0	0	0	0	0	0	0	0	0	0	0	0	2	0	0	0
G1007.43	1	+	1971	11	novel_in_catalog	ENSMUSG00000026150	novel	2087	11	coding	327	984	317	1300	82706977	82729437	FALSE	TRUE	TRUE	Full	32	78	5.99523	0.00496146	F	0	2	4	0	0	4	5	3	0	0	2	3	0	0	3	3	3	4	4	6	0	0	0	0
G1007.44	1	+	1331	10	novel_in_catalog	ENSMUSG00000026150	novel	2087	11	coding	316	951	317	1267	82706977	82729437	FALSE	TRUE	TRUE	Full	6	78	4.09148	0.00338598	F	0	0	0	0	0	0	2	0	0	0	0	0	0	0	0	0	0	0	0	0	0	0	0	0
G1007.45	1	+	1938	10	novel_in_catalog	ENSMUSG00000026150	novel	2087	11	coding	316	951	317	1267	82706977	82729437	FALSE	TRUE	TRUE	Full	47	78	25.735	0.0212975	F	9	15	15	11	8	13	8	7	6	9	14	7	5	2	7	9	14	14	9	22	12	12	8	10
G1007.46	1	+	1779	9	novel_in_catalog	ENSMUSG00000026150	novel	2087	11	coding	263	792	317	1108	82706977	82729437	FALSE	TRUE	TRUE	Full	25	78	27.2584	0.0225582	F	0	0	0	0	0	4	0	0	0	0	2	0	0	0	0	0	5	0	0	6	0	0	0	0
G1007.47	1	+	1110	8	full-splice_match	ENSMUSG00000026150	ENSMUST00000161648	1715	8	coding	243	732	317	1048	82706977	82729437	FALSE	TRUE	TRUE	Full	1	78	3.36102	0.00278147	F	0	0	0	0	0	0	0	0	0	0	0	0	0	0	0	0	0	0	0	0	0	0	0	0
G1007.48	1	+	1675	8	full-splice_match	ENSMUSG00000026150	ENSMUST00000161648	1715	8	coding	243	732	317	1048	82706977	82729437	FALSE	TRUE	TRUE	Full	1	78	4.19992	0.00347572	F	0	0	0	0	0	0	0	0	0	0	0	0	0	0	0	0	0	0	0	0	0	0	0	0
G1007.49	1	+	1719	8	full-splice_match	ENSMUSG00000026150	ENSMUST00000161648	1715	8	coding	243	732	317	1048	82706977	82729437	FALSE	TRUE	TRUE	Full	17	78	12.6361	0.0104573	F	0	2	0	0	0	0	0	0	0	0	0	0	0	0	0	0	0	0	0	2	0	0	0	0
G1007.5	1	+	1232	8	novel_in_catalog	ENSMUSG00000026150	novel	1894	9	coding	271	816	353	1168	82706977	82729437	FALSE	TRUE	TRUE	Full	3	78	3.11627	0.00257892	F	0	0	0	0	0	0	0	0	0	0	0	0	0	0	0	0	0	2	2	0	0	0	0	0
G1007.51	1	+	1289	10	novel_in_catalog	ENSMUSG00000026150	novel	1894	9	coding	302	909	317	1225	82706977	82729437	FALSE	TRUE	TRUE	Full	39	78	6.28569	0.00520184	F	0	0	2	0	2	2	5	4	4	5	0	0	0	0	2	2	0	4	3	7	0	4	7	4
G1007.52	1	+	1852	10	novel_in_catalog	ENSMUSG00000026150	novel	1894	9	coding	302	909	317	1225	82706977	82729437	FALSE	TRUE	TRUE	Full	6	78	3.16745	0.00262128	F	0	0	0	0	0	0	0	0	0	0	0	0	0	0	2	0	0	0	0	0	2	0	0	0
G1007.53	1	+	1896	10	novel_in_catalog	ENSMUSG00000026150	novel	1894	9	coding	302	909	317	1225	82706977	82729437	FALSE	TRUE	TRUE	Full	48	78	128.226	0.106116	F	58	80	83	76	73	76	89	58	75	81	60	67	33	76	73	57	67	11	127	5	63	6	147	90
G1007.54	1	+	2144	10	novel_in_catalog	ENSMUSG00000026150	novel	1894	9	coding	302	909	317	1225	82706977	82729437	FALSE	TRUE	TRUE	Full	2	78	2.98237	0.00246812	F	0	0	0	0	0	0	0	0	0	0	0	0	0	0	0	0	0	0	0	2	0	0	0	0
G1007.55	1	+	1117	9	full-splice_match	ENSMUSG00000026150	ENSMUST00000078332	1894	9	coding	267	801	317	1117	82706977	82729362	FALSE	TRUE	TRUE	Full	3	78	3.26302	0.00270038	F	0	0	0	0	0	0	0	0	0	0	0	0	0	0	0	0	0	0	0	0	0	0	0	0
G1007.56	1	+	1256	9	full-splice_match	ENSMUSG00000026150	ENSMUST00000078332	1894	9	coding	291	876	317	1192	82706977	82729437	FALSE	TRUE	TRUE	Full	44	78	10.6421	0.00880704	F	7	2	6	3	4	0	8	7	0	7	6	5	3	10	5	9	2	5	11	14	9	8	3	7
G1007.57	1	+	1819	9	full-splice_match	ENSMUSG00000026150	ENSMUST00000078332	1894	9	coding	291	876	317	1192	82706977	82729437	FALSE	TRUE	TRUE	Full	18	78	4.09528	0.00338912	F	3	0	0	2	0	0	0	0	0	0	0	0	0	0	3	0	2	2	2	5	2	0	0	0
G1007.58	1	+	1863	9	full-splice_match	ENSMUSG00000026150	ENSMUST00000078332	1894	9	coding	291	876	317	1192	82706977	82729437	FALSE	TRUE	TRUE	Full	48	78	453.516	0.375315	T	214	229	231	195	174	176	242	136	177	258	156	138	124	247	255	165	423	583	305	504	457	550	347	254
G1007.59	1	+	2440	9	full-splice_match	ENSMUSG00000026150	ENSMUST00000078332	1894	9	coding	291	876	317	1192	82706977	82729437	FALSE	TRUE	TRUE	Full	1	78	3.20782	0.00265469	F	0	0	0	0	0	0	0	0	0	0	0	0	0	0	2	0	0	0	0	0	0	0	0	0
G1007.6	1	+	3562	6	novel_in_catalog	ENSMUSG00000026150	novel	1706	8	coding	219	660	2232	2891	82706977	82729437	FALSE	TRUE	TRUE	Full	2	78	3.25529	0.00269397	F	0	0	0	0	0	0	0	0	0	0	0	0	0	0	0	0	0	0	0	2	0	0	0	0
G1007.60	1	+	1803	8	novel_in_catalog	ENSMUSG00000026150	novel	1894	9	coding	271	816	317	1132	82706977	82729437	FALSE	TRUE	TRUE	Full	48	78	36.1165	0.0298889	F	16	18	22	14	12	18	17	13	14	16	17	13	12	23	19	20	47	49	35	43	31	43	42	31
G1007.62	1	+	1759	10	novel_not_in_catalog	ENSMUSG00000026150	novel	1894	9	coding	159	480	317	796	82706977	82723262	TRUE	TRUE	TRUE	Full	1	78	22.6754	0.0187654	F	0	0	0	0	0	0	0	0	0	0	0	0	0	0	0	0	0	0	0	0	0	0	0	0
G1007.63	1	+	1779	10	novel_not_in_catalog	ENSMUSG00000026150	novel	1894	9	coding	263	792	317	1108	82706977	82729437	FALSE	TRUE	TRUE	Full	13	78	8.4084	0.00695853	F	5	7	6	0	0	0	3	0	2	2	0	0	0	0	4	2	0	2	0	0	0	3	2	2
G1007.64	1	+	1746	9	novel_not_in_catalog	ENSMUSG00000026150	novel	1894	9	coding	252	759	317	1075	82706977	82729437	FALSE	TRUE	TRUE	Full	42	78	11.1592	0.00923503	F	6	6	3	3	2	4	5	0	4	0	3	3	0	6	7	6	6	12	0	7	6	7	3	5
G1007.65	1	+	1097	8	full-splice_match	ENSMUSG00000026150	ENSMUST00000160786	1645	8	coding	238	717	317	1033	82706977	82729437	FALSE	TRUE	TRUE	Full	11	78	4.27948	0.00354157	F	2	0	0	0	0	0	0	0	0	2	0	0	0	2	0	3	0	2	0	3	0	4	0	0
G1007.66	1	+	1704	8	full-splice_match	ENSMUSG00000026150	ENSMUST00000160786	1645	8	coding	238	717	317	1033	82706977	82729437	FALSE	TRUE	TRUE	Full	48	78	49.2566	0.0407632	F	29	29	25	28	25	14	31	20	17	26	18	27	11	52	44	32	55	50	65	44	56	69	56	40
G1007.67	1	+	1037	7	novel_in_catalog	ENSMUSG00000026150	novel	1715	8	coding	218	657	317	973	82706977	82729437	FALSE	TRUE	TRUE	Full	19	78	4.85573	0.00401845	F	0	0	0	0	0	0	0	0	0	3	0	0	2	2	2	3	0	3	0	4	0	0	5	3
G1007.68	1	+	1600	7	novel_in_catalog	ENSMUSG00000026150	novel	1715	8	coding	218	657	317	973	82706977	82729437	FALSE	TRUE	TRUE	Full	4	78	3.77346	0.00312279	F	0	0	0	0	0	0	2	0	0	0	0	0	0	0	2	0	0	0	0	0	0	0	0	0
G1007.69	1	+	1644	7	novel_in_catalog	ENSMUSG00000026150	novel	1706	8	coding	218	657	317	973	82706977	82729437	FALSE	TRUE	TRUE	Full	48	78	111.862	0.0925735	F	50	54	60	46	40	59	75	61	46	77	38	40	25	65	98	66	136	122	150	130	141	114	120	122
G1007.7	1	+	3778	8	novel_in_catalog	ENSMUSG00000026150	novel	2087	11	coding	291	876	2232	3107	82706977	82729437	FALSE	TRUE	TRUE	Full	3	78	3.39777	0.00281189	F	0	0	0	0	0	0	0	0	2	0	0	2	0	0	0	0	0	0	0	0	0	2	0	0
G1007.71	1	+	1977	5	full-splice_match	ENSMUSG00000026150	ENSMUST00000162056	1961	5	coding	147	444	317	760	82706977	82713232	FALSE	TRUE	TRUE	Full	3	78	3.13872	0.00259751	F	0	0	0	0	0	2	0	0	0	0	0	0	0	0	0	0	0	0	2	2	0	0	0	0
G1007.72	1	+	1698	8	novel_in_catalog	ENSMUSG00000026150	novel	1894	9	coding	162	489	534	1022	82713176	82729437	FALSE	TRUE	TRUE	Full	2	78	3.56052	0.00294657	F	0	0	0	0	0	0	0	0	0	0	0	0	0	0	0	0	0	0	0	0	0	0	0	0
G1007.73	1	+	1483	7	novel_in_catalog	ENSMUSG00000026150	novel	1706	8	coding	109	330	483	812	82713176	82729437	FALSE	TRUE	TRUE	Full	1	78	2.85755	0.00236482	F	0	0	0	0	0	0	0	0	0	0	0	0	0	0	0	0	0	0	0	2	0	0	0	0
G1007.74	1	+	1697	7	novel_in_catalog	ENSMUSG00000026150	novel	2087	11	coding	272	819	208	1026	82706977	82729437	FALSE	TRUE	TRUE	Full	1	78	3.1072	0.00257142	F	0	0	0	0	0	0	0	0	0	0	0	0	0	0	0	0	0	0	0	0	0	0	0	0
G1007.75	1	+	1598	7	novel_in_catalog	ENSMUSG00000026150	novel	1706	8	coding	239	720	208	927	82706977	82729437	FALSE	TRUE	TRUE	Full	2	78	5.5645	0.00460501	F	0	0	0	0	0	0	0	0	0	0	0	0	0	0	0	0	0	0	0	0	0	0	0	0
G1007.76	1	+	1829	9	novel_in_catalog	ENSMUSG00000026150	novel	2087	11	coding	316	951	208	1158	82706977	82729437	FALSE	TRUE	TRUE	Full	1	78	3.1072	0.00257142	F	0	0	0	0	0	0	0	0	0	0	0	0	0	0	0	0	0	0	0	0	0	0	0	0
G1007.77	1	+	1610	7	novel_in_catalog	ENSMUSG00000026150	novel	1715	8	coding	243	732	208	939	82706977	82729437	FALSE	TRUE	TRUE	Full	1	78	3.15622	0.00261199	F	0	0	0	0	0	0	0	0	0	0	0	0	0	0	0	0	0	0	0	0	0	0	0	0
G1007.78	1	+	1787	9	novel_in_catalog	ENSMUSG00000026150	novel	1894	9	coding	302	909	208	1116	82706977	82729437	FALSE	TRUE	TRUE	Full	4	78	9.18392	0.00760033	F	0	0	0	0	0	0	0	0	0	0	0	0	0	0	0	0	0	0	0	0	0	0	0	0
G1007.79	1	+	1754	8	novel_in_catalog	ENSMUSG00000026150	novel	1894	9	coding	291	876	208	1083	82706977	82729437	FALSE	TRUE	TRUE	Full	6	78	14.4871	0.0119891	F	0	0	0	0	0	0	0	0	0	0	0	0	0	0	0	0	0	0	0	0	0	0	0	0
G1007.8	1	+	1849	10	novel_in_catalog	ENSMUSG00000026150	novel	2087	11	coding	275	828	351	1178	82706977	82729437	FALSE	TRUE	TRUE	Full	2	78	8.52639	0.00705617	F	0	0	0	0	0	0	0	0	0	0	0	0	0	0	0	0	0	0	0	0	0	0	0	0
G1007.80	1	+	1535	6	novel_in_catalog	ENSMUSG00000026150	novel	1706	8	coding	218	657	208	864	82706977	82729437	FALSE	TRUE	TRUE	Full	5	78	5.72313	0.00473628	F	0	0	0	0	0	0	0	0	0	0	0	0	0	0	0	0	0	0	0	0	0	0	0	0
G1007.85	1	+	1540	9	novel_in_catalog	ENSMUSG00000026150	novel	1894	9	coding	292	879	313	1191	82706977	82729437	FALSE	TRUE	TRUE	Full	2	78	3.56052	0.00294657	F	0	0	0	0	0	0	0	0	0	0	0	0	0	0	0	0	0	0	0	0	0	0	0	0
G1007.86	1	+	1028	9	novel_in_catalog	ENSMUSG00000026150	novel	2087	11	coding	238	714	313	1026	82706977	82729359	FALSE	TRUE	TRUE	Full	1	78	3.46801	0.00287001	F	0	0	0	0	0	0	0	0	0	0	0	0	0	0	0	0	0	0	0	0	0	0	0	0
G1007.87	1	+	2093	8	incomplete-splice_match	ENSMUSG00000026150	ENSMUST00000078332	1894	9	coding	259	780	313	1092	82706977	82728361	FALSE	TRUE	TRUE	Full	1	78	5.20201	0.00430502	F	0	0	0	0	0	0	0	0	0	0	0	0	0	0	0	0	0	0	0	0	0	0	0	0
G1007.9	1	+	1489	11	novel_in_catalog	ENSMUSG00000026150	novel	2087	11	coding	328	987	439	1425	82705922	82729437	FALSE	TRUE	TRUE	Full	4	78	4.3215	0.00357633	F	0	0	0	0	0	0	0	0	0	0	0	0	2	0	0	0	0	0	0	3	0	2	0	0
G1007.96	1	+	1608	8	novel_in_catalog	ENSMUSG00000026150	novel	2087	11	coding	263	792	150	941	82706977	82729437	FALSE	TRUE	TRUE	Full	1	78	3.76427	0.00311519	F	0	0	0	0	0	0	0	0	0	0	0	0	0	0	0	0	0	0	0	0	0	0	0	0
G1007.97	1	+	1696	8	incomplete-splice_match	ENSMUSG00000026150	ENSMUST00000078332	1894	9	coding	291	876	150	1025	82706977	82729437	FALSE	TRUE	TRUE	Full	9	78	9.15457	0.00757604	F	0	0	5	0	0	0	0	0	0	0	0	0	0	0	0	0	0	2	0	0	0	0	0	0
G1007.98	1	+	1705	9	novel_in_catalog	ENSMUSG00000026150	novel	1894	9	coding	302	909	126	1034	82706977	82729437	FALSE	TRUE	TRUE	Full	3	78	5.19311	0.00429765	F	0	0	0	0	0	0	0	0	0	0	0	0	2	0	0	0	0	0	0	0	0	0	0	0
G1007.99	1	+	1453	6	novel_in_catalog	ENSMUSG00000026150	novel	1706	8	coding	218	657	126	782	82706977	82729437	FALSE	TRUE	TRUE	Full	1	78	3.01633	0.00249622	F	0	0	0	0	0	0	0	0	0	0	0	0	0	0	0	0	0	0	0	0	0	0	0	0
G10070.12	14	+	2055	12	incomplete-splice_match	ENSMUSG00000021913	ENSMUST00000228529	3723	24	coding	508	1527	12	1538	32061890	32069586	FALSE	TRUE	TRUE	Full	1	10	4.38121	0.0826022	F	0	0	0	0	0	0	0	0	0	0	0	0	0	0	0	0	0	0	0	0	0	0	0	2
G10070.14	14	+	1917	11	incomplete-splice_match	ENSMUSG00000021913	ENSMUST00000228529	3723	24	coding	422	1269	132	1400	32063191	32069586	FALSE	TRUE	TRUE	Full	4	10	4.78356	0.090188	F	0	0	0	0	0	0	0	0	0	0	0	0	0	0	0	0	0	0	0	0	0	2	0	0
G10070.18	14	+	1239	6	incomplete-splice_match	ENSMUSG00000021913	ENSMUST00000228529	3723	24	coding	223	672	51	722	32066713	32069586	FALSE	TRUE	TRUE	Full	1	10	6.57181	0.123903	F	0	0	0	0	0	0	0	0	0	0	0	0	0	0	0	0	0	0	0	0	0	0	0	3
G10070.2	14	+	3685	23	novel_in_catalog	ENSMUSG00000021913	novel	3723	24	coding	1010	3033	130	3162	32047752	32069586	FALSE	TRUE	TRUE	Full	1	10	4.74405	0.0894431	F	0	0	3	0	0	0	0	0	0	0	0	0	0	0	0	0	0	0	0	0	0	0	0	0
G10070.22	14	+	766	2	incomplete-splice_match	ENSMUSG00000021913	ENSMUST00000228529	3723	24	non_coding	NA	NA	NA	NA	NA	NA	NA	TRUE	TRUE	Full	2	10	3.28824	0.0619956	F	0	0	0	0	0	0	0	0	0	0	0	0	0	0	0	0	0	0	0	0	0	0	0	0
G10070.4	14	+	3722	24	full-splice_match	ENSMUSG00000021913	ENSMUST00000228529	3723	24	coding	1010	3033	173	3205	32047752	32069586	FALSE	TRUE	TRUE	Full	20	10	14.8126	0.279273	T	18	29	13	0	0	0	0	0	0	0	0	2	5	0	0	0	8	9	0	5	9	6	6	3
G10070.5	14	+	1173	5	novel_in_catalog	ENSMUSG00000021913	novel	3723	24	coding	226	681	164	844	32047752	32049906	FALSE	TRUE	TRUE	Full	1	10	3.61348	0.0681276	F	0	0	0	0	0	0	0	0	0	0	0	2	0	0	0	0	0	0	0	0	0	0	0	0
G10070.6	14	+	3156	20	incomplete-splice_match	ENSMUSG00000021913	ENSMUST00000228529	3723	24	coding	801	2406	234	2639	32054738	32069586	FALSE	TRUE	TRUE	Full	1	10	3.14531	0.0593008	F	0	0	0	0	0	0	0	0	0	0	0	0	0	0	0	0	0	0	0	0	0	0	0	0
G10070.7	14	+	2773	17	incomplete-splice_match	ENSMUSG00000021913	ENSMUST00000228529	3723	24	coding	738	2217	40	2256	32055734	32069586	FALSE	TRUE	TRUE	Full	1	10	3.07509	0.0579769	F	0	0	0	0	0	0	0	0	0	0	0	0	0	0	0	0	0	0	0	0	2	0	0	0
G10070.8	14	+	2367	14	incomplete-splice_match	ENSMUSG00000021913	ENSMUST00000228529	3723	24	coding	570	1713	138	1850	32061188	32069586	FALSE	TRUE	TRUE	Full	2	10	4.62453	0.0871897	F	0	0	0	0	0	0	0	0	0	0	0	0	0	0	0	0	0	0	0	0	0	0	0	0
G10071.1	14	-	1706	3	full-splice_match	ENSMUSG00000072473	ENSMUST00000100723	850	3	coding	93	282	40	321	32110309	32098554	FALSE	TRUE	TRUE	Full	3	3	3.45897	0.305293	F	0	0	0	0	0	2	0	2	0	2	0	0	0	0	0	0	0	0	0	0	0	0	0	0
G10071.2	14	-	847	3	full-splice_match	ENSMUSG00000072473	ENSMUST00000100723	850	3	coding	93	282	40	321	32110309	32098554	FALSE	TRUE	TRUE	Full	8	3	4.50971	0.398033	T	0	0	0	2	0	0	3	3	0	0	0	2	0	0	0	4	0	0	2	0	0	0	0	0
G10071.4	14	-	643	3	full-splice_match	ENSMUSG00000072473	ENSMUST00000100723	850	3	coding	93	282	40	321	32110309	32098554	FALSE	TRUE	TRUE	Full	1	3	3.36131	0.296674	F	0	0	0	0	2	0	0	0	0	0	0	0	0	0	0	0	0	0	0	0	0	0	0	0
G10078.1	14	+	2207	6	intergenic	novelGene_2_61	novel	NA	NA	coding	124	375	994	1368	32469023	32469397	FALSE	TRUE	TRUE	Full	1	2	3.62379	0.547038	T	0	0	0	0	0	0	0	0	0	0	0	0	0	0	0	0	0	0	0	0	0	0	0	0
G10078.2	14	+	1957	5	intergenic	novelGene_2_62	novel	NA	NA	coding	124	375	744	1118	32469023	32469397	FALSE	TRUE	TRUE	Full	1	2	3.00059	0.452962	F	0	0	0	2	0	0	0	0	0	0	0	0	0	0	0	0	0	0	0	0	0	0	0	0
G10079.1	14	+	1410	5	full-splice_match	ENSMUSG00000041707	ENSMUST00000039191	1489	5	coding	95	288	89	376	32508008	32538828	FALSE	TRUE	TRUE	Full	4	2	3.93258	0.525853	T	0	0	0	0	0	0	0	0	0	0	0	0	0	0	0	0	0	0	0	0	0	0	2	0
G10079.2	14	+	821	2	novel_not_in_catalog	ENSMUSG00000041707	novel	373	2	non_coding	NA	NA	NA	NA	NA	NA	NA	TRUE	TRUE	Full	2	2	3.5459	0.474147	F	0	0	0	0	0	0	0	0	0	0	0	0	0	0	0	0	0	0	0	0	0	0	0	0
G10080.1	14	+	2407	8	full-splice_match	ENSMUSG00000050666	ENSMUST00000053175	2745	8	coding	319	960	152	1111	32578869	32659819	FALSE	TRUE	TRUE	Full	3	4	6.03199	0.229391	F	0	0	0	0	0	0	0	0	0	0	0	0	0	0	0	0	0	0	0	0	0	0	0	0
G10080.2	14	+	1360	8	novel_not_in_catalog	ENSMUSG00000050666	novel	2745	8	coding	362	1089	112	1200	32578869	32651854	FALSE	TRUE	TRUE	Full	1	4	3.00059	0.11411	F	0	0	0	2	0	0	0	0	0	0	0	0	0	0	0	0	0	0	0	0	0	0	0	0
G10080.4	14	+	2615	8	full-splice_match	ENSMUSG00000050666	ENSMUST00000053175	2745	8	coding	319	960	29	988	32578869	32659819	FALSE	TRUE	TRUE	Full	3	4	4.07623	0.155015	F	0	0	0	0	0	0	0	0	0	0	0	0	0	4	0	0	0	0	0	0	0	0	0	0
G10080.5	14	+	2124	8	full-splice_match	ENSMUSG00000050666	ENSMUST00000053175	2745	8	coding	319	960	28	987	32578869	32659819	FALSE	TRUE	TRUE	Full	42	4	13.1868	0.501483	T	8	11	8	13	18	19	6	4	11	7	7	10	5	10	11	3	6	3	4	7	6	6	7	4
G10081.1	14	+	2368	3	incomplete-splice_match	ENSMUSG00000041673	ENSMUST00000038956	2587	4	coding	262	789	137	925	32730463	32735806	FALSE	TRUE	TRUE	Full	6	1	3.77942	1	T	0	0	0	0	0	0	0	0	0	0	0	0	0	0	0	0	0	0	0	0	0	0	0	0
G10082.1	14	-	1327	5	novel_not_in_catalog	ENSMUSG00000051506	novel	347	2	coding	101	306	474	779	32917093	32914801	TRUE	TRUE	TRUE	Full	1	1	3.78186	1	T	0	0	0	0	0	0	0	0	0	0	0	0	0	0	0	2	0	0	0	0	0	0	0	0
G10083.1	14	+	2877	11	novel_in_catalog	ENSMUSG00000063506	novel	437	3	coding	678	2037	486	2522	32993761	33091535	FALSE	TRUE	TRUE	Full	22	8	6.7182	0.228484	T	11	6	2	2	0	2	0	0	2	0	0	0	0	0	0	0	5	5	0	3	5	2	5	0
G10083.10	14	+	1053	2	incomplete-splice_match	ENSMUSG00000063506	ENSMUST00000111955	2148	6	coding	64	195	504	698	33091341	33091535	FALSE	TRUE	TRUE	Full	1	8	2.85755	0.0971842	F	0	0	0	0	0	0	0	0	0	0	0	0	0	0	0	0	0	0	0	2	0	0	0	0
G10083.2	14	+	2888	11	novel_in_catalog	ENSMUSG00000063506	novel	437	3	coding	322	969	486	1454	32993761	33088550	TRUE	TRUE	TRUE	Full	2	8	3.22993	0.109849	F	2	0	0	0	0	0	0	0	0	0	0	0	0	0	0	0	0	0	0	0	0	0	0	0
G10083.3	14	+	2898	11	novel_not_in_catalog	ENSMUSG00000063506	novel	437	3	coding	678	2037	507	2543	32993761	33091535	FALSE	TRUE	TRUE	Full	1	8	3.00059	0.102049	F	0	0	0	2	0	0	0	0	0	0	0	0	0	0	0	0	0	0	0	0	0	0	0	0
G10083.4	14	+	2608	9	novel_in_catalog	ENSMUSG00000063506	novel	426	2	coding	609	1830	424	2253	32993761	33091535	FALSE	TRUE	TRUE	Full	1	8	3.19754	0.108747	F	0	0	0	0	0	0	0	0	0	0	0	0	0	0	0	0	0	2	0	0	0	0	0	0
G10083.6	14	+	2689	10	novel_in_catalog	ENSMUSG00000063506	novel	2596	11	coding	678	2037	298	2334	32993761	33091535	FALSE	TRUE	TRUE	Full	4	8	3.93411	0.133798	F	0	2	0	0	0	0	0	0	0	0	0	0	0	0	0	0	0	0	0	2	0	0	0	0
G10083.7	14	+	2760	10	novel_in_catalog	ENSMUSG00000063506	novel	711	4	coding	696	2091	315	2405	32972661	33091535	FALSE	TRUE	TRUE	Full	14	8	3.70657	0.126059	F	2	0	0	0	0	0	0	0	0	0	0	0	0	0	0	0	2	3	0	2	2	0	2	0
G10083.8	14	+	2313	8	novel_in_catalog	ENSMUSG00000063506	novel	2148	6	coding	606	1821	138	1958	33041838	33091535	FALSE	TRUE	TRUE	Full	1	8	2.75893	0.0938301	F	0	0	0	0	0	0	0	0	0	0	0	0	0	0	0	0	0	0	0	0	0	0	0	0
G10085.12	14	-	2871	12	novel_in_catalog	ENSMUSG00000021936	novel	2587	12	coding	384	1155	204	1358	33132934	33104265	FALSE	TRUE	TRUE	Full	2	5	4.22467	0.1597	F	0	0	0	0	0	0	0	0	0	0	0	0	0	0	0	0	0	3	0	0	0	0	0	0
G10085.14	14	-	2852	12	full-splice_match	ENSMUSG00000021936	ENSMUST00000111945	5756	12	coding	384	1155	186	1340	33132934	33104265	FALSE	TRUE	TRUE	Full	34	5	9.59597	0.362744	T	5	5	3	6	4	10	7	3	5	16	2	6	0	7	3	0	2	0	4	0	2	2	0	2
G10085.15	14	-	1855	12	full-splice_match	ENSMUSG00000021936	ENSMUST00000111945	5756	12	coding	384	1155	182	1336	33132934	33104265	FALSE	TRUE	FALSE	Full	8	5	4.36663	0.165066	F	0	0	0	4	0	2	3	0	0	0	0	3	0	0	0	0	0	0	2	0	0	0	0	0
G10085.3	14	-	5758	12	full-splice_match	ENSMUSG00000021936	ENSMUST00000111945	5756	12	coding	384	1155	197	1351	33132934	33104265	FALSE	TRUE	TRUE	Full	1	5	4.97522	0.188071	F	3	0	0	0	0	0	0	0	0	0	0	0	0	0	0	0	0	0	0	0	0	0	0	0
G10085.9	14	-	3461	12	full-splice_match	ENSMUSG00000021936	ENSMUST00000111945	5756	12	coding	384	1155	200	1354	33132934	33104265	FALSE	TRUE	TRUE	Full	2	5	3.29136	0.124419	F	0	2	0	0	0	0	0	0	0	2	0	0	0	0	0	0	0	0	0	0	0	0	0	0
G10086.2	14	+	2471	3	full-splice_match	ENSMUSG00000021943	ENSMUST00000168727	5210	3	coding	476	1431	274	1704	33645853	33656470	FALSE	TRUE	TRUE	Full	29	2	13.6997	0.77155	T	43	26	16	4	0	0	2	0	2	0	4	0	2	4	2	0	14	14	0	8	7	7	12	5
G10086.3	14	+	2381	3	full-splice_match	ENSMUSG00000021943	ENSMUST00000168727	5210	3	coding	476	1431	246	1676	33645853	33656470	FALSE	TRUE	TRUE	Full	4	2	4.05637	0.22845	F	0	0	0	0	0	0	0	0	0	0	2	0	0	0	0	0	0	0	0	0	4	0	2	0
G10087.2	14	-	3374	3	novel_not_in_catalog	ENSMUSG00000044519	novel	4301	2	coding	385	1158	57	1214	33699920	33692148	TRUE	TRUE	TRUE	Full	1	6	3.1072	0.115046	F	0	0	0	0	0	0	0	0	0	0	0	0	0	0	0	0	0	0	0	0	0	0	0	0
G10087.3	14	-	3467	3	novel_not_in_catalog	ENSMUSG00000044519	novel	4301	2	coding	337	1014	294	1307	33693161	33692148	TRUE	TRUE	TRUE	Full	9	6	5.12448	0.189738	F	0	0	0	3	0	2	0	0	0	0	0	0	0	0	0	0	0	7	0	2	0	0	2	0
G10087.5	14	-	751	2	novel_not_in_catalog	ENSMUSG00000044519	novel	4301	2	non_coding	NA	NA	NA	NA	NA	NA	NA	TRUE	TRUE	Full	2	6	4.47377	0.165645	F	0	0	0	0	0	0	0	0	0	0	0	0	0	0	0	0	0	0	0	0	0	0	0	0
G10087.6	14	-	3136	3	novel_not_in_catalog	ENSMUSG00000044519	novel	4301	2	coding	337	1014	190	1203	33693161	33692148	TRUE	TRUE	TRUE	Full	10	6	6.02464	0.223066	T	3	0	0	4	5	2	0	0	0	0	0	0	0	0	0	0	0	7	0	3	0	0	0	3
G10087.7	14	-	2722	2	full-splice_match	ENSMUSG00000044519	ENSMUST00000166737	4301	2	coding	337	1014	203	1216	33693161	33692148	FALSE	TRUE	TRUE	Full	2	6	4.70447	0.174186	F	0	0	0	0	0	0	0	0	0	0	0	0	0	0	0	0	0	3	0	0	3	0	0	0
G10087.8	14	-	1540	2	full-splice_match	ENSMUSG00000044519	ENSMUST00000166737	4301	2	coding	337	1014	301	1314	33693161	33692148	FALSE	TRUE	TRUE	Full	5	6	3.57369	0.132318	F	2	0	0	0	0	0	0	2	0	2	0	0	0	0	0	0	0	0	2	0	0	0	0	2
G10089.1	14	+	1838	12	full-splice_match	ENSMUSG00000021950	ENSMUST00000022519	1880	12	coding	327	984	39	1022	33808013	33821707	FALSE	TRUE	TRUE	Full	37	1	7.59058	1	T	0	0	0	4	2	2	0	2	3	2	9	2	3	6	4	0	6	4	2	6	4	5	0	4
G1009.1	1	+	2309	13	full-splice_match	ENSMUSG00000026159	ENSMUST00000190052	2991	13	coding	537	1614	87	1700	82817444	82872779	FALSE	TRUE	TRUE	Full	4	4	3.29506	0.217488	F	0	0	0	0	0	0	0	0	0	0	2	0	0	0	0	0	0	0	0	0	0	0	2	0
G1009.2	1	+	3016	13	full-splice_match	ENSMUSG00000026159	ENSMUST00000190052	2991	13	coding	537	1614	87	1700	82817444	82872779	FALSE	TRUE	TRUE	Full	5	4	4.68744	0.309391	T	0	2	5	0	0	0	0	0	0	0	0	0	0	0	0	0	0	0	0	0	0	0	0	0
G1009.3	1	+	2056	12	incomplete-splice_match	ENSMUSG00000026159	ENSMUST00000190052	2991	13	coding	468	1407	41	1447	82836117	82872779	FALSE	TRUE	TRUE	Full	1	4	3.49114	0.23043	F	0	0	0	0	0	0	0	0	0	0	0	0	0	0	0	0	0	0	0	0	0	0	0	0
G1009.4	1	+	2390	12	incomplete-splice_match	ENSMUSG00000026159	ENSMUST00000190052	2991	13	coding	468	1407	41	1447	82836117	82872779	FALSE	TRUE	FALSE	Full	1	4	3.67691	0.242692	F	0	0	0	0	0	0	2	0	0	0	0	0	0	0	0	0	0	0	0	0	0	0	0	0
G10092.1	14	+	3679	8	novel_not_in_catalog	ENSMUSG00000041479	novel	3623	8	coding	411	1236	183	1418	33942131	33950138	FALSE	TRUE	TRUE	Full	1	1	3.59279	1	T	0	0	0	0	0	0	0	0	0	0	2	0	0	0	0	0	0	0	0	0	0	0	0	0
G10093.1	14	-	3560	11	full-splice_match	ENSMUSG00000041471	ENSMUST00000111917	3317	11	coding	862	2589	663	3251	33990817	33959305	FALSE	FALSE	TRUE	Full	1	1	4.43767	1	T	0	0	0	0	0	0	0	0	0	0	0	0	0	0	0	0	0	0	0	0	0	0	0	0
G10095.1	14	+	842	3	incomplete-splice_match	ENSMUSG00000021794	ENSMUST00000022322	3390	13	coding	194	582	260	841	34032855	34043780	FALSE	TRUE	FALSE	Full	2	21	3.36884	0.0102281	F	0	0	0	0	0	0	0	0	0	0	0	0	0	0	0	0	0	0	0	0	0	0	0	0
G10095.10	14	+	2901	12	novel_in_catalog	ENSMUSG00000021794	novel	3390	13	coding	531	1596	126	1721	34032855	34065680	FALSE	TRUE	TRUE	Full	6	21	3.88857	0.011806	F	0	0	0	0	0	0	0	0	0	0	0	2	0	3	0	0	0	2	0	0	0	0	0	2
G10095.2	14	+	3087	13	full-splice_match	ENSMUSG00000021794	ENSMUST00000022322	3390	13	coding	558	1677	231	1907	34032855	34065680	FALSE	TRUE	TRUE	Full	48	21	210.938	0.640424	T	196	217	148	190	81	100	106	48	225	161	220	155	92	160	125	29	163	165	61	182	200	143	249	77
G10095.21	14	+	2414	12	incomplete-splice_match	ENSMUSG00000021794	ENSMUST00000022322	3390	13	coding	391	1176	59	1234	34041895	34065680	FALSE	TRUE	TRUE	Full	4	21	3.37824	0.0102566	F	0	0	0	0	2	2	0	0	0	0	0	0	0	0	0	0	0	0	0	0	0	0	0	0
G10095.22	14	+	2332	11	incomplete-splice_match	ENSMUSG00000021794	ENSMUST00000022322	3390	13	coding	352	1059	94	1152	34047506	34065680	FALSE	TRUE	TRUE	Full	4	21	3.97789	0.0120772	F	0	0	2	0	3	0	0	0	0	0	0	0	0	0	0	0	0	0	0	0	0	3	0	0
G10095.23	14	+	2262	10	incomplete-splice_match	ENSMUSG00000021794	ENSMUST00000022322	3390	13	coding	352	1059	24	1082	34047506	34065680	FALSE	TRUE	TRUE	Full	2	21	3.69283	0.0112117	F	0	0	0	0	0	0	0	0	0	0	0	0	0	0	0	0	0	0	0	0	0	0	0	0
G10095.24	14	+	2212	9	incomplete-splice_match	ENSMUSG00000021794	ENSMUST00000022322	3390	13	coding	333	1002	31	1032	34051275	34065680	FALSE	TRUE	TRUE	Full	8	21	4.48762	0.0136248	F	0	0	0	0	0	0	0	0	0	0	0	0	2	0	0	3	2	0	5	0	0	0	0	0
G10095.25	14	+	2182	9	novel_in_catalog	ENSMUSG00000021794	novel	699	6	coding	264	795	208	1002	34056210	34065680	FALSE	TRUE	TRUE	Full	2	21	3.76254	0.0114234	F	0	0	0	2	0	0	0	0	0	0	0	0	0	0	0	0	0	0	0	0	0	0	0	0
G10095.26	14	+	2115	8	incomplete-splice_match	ENSMUSG00000021794	ENSMUST00000022322	3390	13	coding	269	810	126	935	34056195	34065680	FALSE	TRUE	TRUE	Full	20	21	7.47609	0.022698	F	2	0	5	0	11	0	0	5	4	0	0	0	0	5	0	0	0	4	2	5	0	0	2	2
G10095.28	14	+	1929	7	incomplete-splice_match	ENSMUSG00000021794	ENSMUST00000022322	3390	13	coding	242	729	21	749	34057286	34065680	FALSE	TRUE	TRUE	Full	6	21	4.32617	0.0131346	F	0	0	0	0	0	0	0	3	0	0	0	0	0	0	0	3	0	0	0	0	0	0	0	0
G10095.29	14	+	1741	7	novel_not_in_catalog	ENSMUSG00000021794	novel	3390	13	coding	136	411	145	555	34058522	34065680	FALSE	TRUE	TRUE	Full	1	21	3.1627	0.00960221	F	0	0	2	0	0	0	0	0	0	0	0	0	0	0	0	0	0	0	0	0	0	0	0	0
G10095.3	14	+	2975	12	novel_in_catalog	ENSMUSG00000021794	novel	3390	13	coding	264	795	1001	1795	34056210	34065680	FALSE	TRUE	TRUE	Full	2	21	3.39516	0.010308	F	0	0	0	0	0	0	0	0	0	0	2	0	0	0	0	0	0	2	0	0	0	0	0	0
G10095.31	14	+	1662	5	incomplete-splice_match	ENSMUSG00000021794	ENSMUST00000022322	3390	13	coding	136	411	72	482	34058522	34065680	FALSE	TRUE	TRUE	Full	4	21	4.30979	0.0130849	F	0	0	0	0	0	0	0	2	0	0	0	0	0	0	0	0	0	0	3	0	0	0	0	0
G10095.32	14	+	1580	4	incomplete-splice_match	ENSMUSG00000021794	ENSMUST00000022322	3390	13	coding	91	276	124	399	34060840	34065680	FALSE	TRUE	TRUE	Full	10	21	4.39433	0.0133415	F	0	0	0	0	0	0	0	2	0	0	0	0	0	3	0	2	0	0	2	0	0	0	0	3
G10095.33	14	+	1454	3	incomplete-splice_match	ENSMUSG00000021794	ENSMUST00000022322	3390	13	non_coding	NA	NA	NA	NA	NA	NA	NA	TRUE	TRUE	Full	2	21	4.0633	0.0123365	F	0	0	3	0	0	2	0	0	0	0	0	0	0	0	0	0	0	0	0	0	0	0	0	0
G10095.4	14	+	2349	13	full-splice_match	ENSMUSG00000021794	ENSMUST00000022322	3390	13	coding	558	1677	126	1802	34032855	34065680	FALSE	TRUE	TRUE	Full	48	21	32.2512	0.0979172	F	30	37	29	24	17	8	14	11	30	37	35	24	13	32	29	3	30	22	10	19	19	16	23	13
G10095.5	14	+	2651	13	full-splice_match	ENSMUSG00000021794	ENSMUST00000022322	3390	13	coding	558	1677	126	1802	34032855	34065680	FALSE	TRUE	FALSE	Full	2	21	3.04165	0.00923469	F	0	0	0	0	0	0	0	0	0	0	0	0	0	0	0	0	0	0	0	0	0	0	0	0
G10095.6	14	+	3057	13	full-splice_match	ENSMUSG00000021794	ENSMUST00000022322	3390	13	coding	558	1677	126	1802	34032855	34065680	FALSE	TRUE	TRUE	Full	36	21	6.61068	0.0200705	F	4	7	2	4	4	2	2	2	6	4	5	7	0	4	3	0	5	4	0	0	5	3	7	2
G10095.7	14	+	3223	13	full-splice_match	ENSMUSG00000021794	ENSMUST00000022322	3390	13	coding	558	1677	126	1802	34032855	34065680	FALSE	TRUE	TRUE	Full	8	21	3.35042	0.0101721	F	0	0	2	3	0	0	0	0	0	2	2	0	0	2	0	0	0	0	0	0	0	0	0	0
G10095.8	14	+	3342	13	full-splice_match	ENSMUSG00000021794	ENSMUST00000022322	3390	13	coding	558	1677	126	1802	34032855	34065680	FALSE	TRUE	TRUE	Full	41	21	12.0759	0.0366633	F	4	3	4	12	0	10	5	2	4	4	6	6	0	7	0	2	0	2	0	12	9	0	7	3
G10095.9	14	+	4404	12	incomplete-splice_match	ENSMUSG00000021794	ENSMUST00000022322	3390	13	coding	532	1599	126	1724	34032855	34064180	FALSE	TRUE	TRUE	Full	1	21	3.42035	0.0103845	F	0	0	0	0	0	0	0	0	0	0	0	0	0	0	0	0	2	0	0	0	0	0	0	0
G10096.1	14	-	385	3	full-splice_match	ENSMUSG00000043681	ENSMUST00000052126	408	3	coding	89	270	62	331	34077315	34073901	FALSE	TRUE	TRUE	Full	1	1	3.00059	1	T	0	0	0	2	0	0	0	0	0	0	0	0	0	0	0	0	0	0	0	0	0	0	0	0
G10097.3	14	-	743	5	full-splice_match	ENSMUSG00000023064	ENSMUST00000023826	852	5	coding	123	372	102	473	34096537	34092502	FALSE	TRUE	TRUE	Full	48	2	23.3761	0.88148	T	12	6	11	17	21	11	12	22	10	15	14	13	7	19	8	31	9	11	29	19	11	21	9	3
G10097.4	14	-	751	5	novel_not_in_catalog	ENSMUSG00000023064	novel	852	5	coding	127	384	98	481	34096537	34092502	FALSE	TRUE	TRUE	Full	1	2	3.14305	0.11852	F	0	0	0	0	0	0	0	0	0	0	0	0	0	0	0	0	0	0	0	0	0	0	0	0
G10098.2	14	+	3898	7	full-splice_match	ENSMUSG00000041445	ENSMUST00000111908	3974	7	coding	943	2832	78	2909	34097572	34125252	FALSE	TRUE	TRUE	Full	7	1	5.19104	1	T	2	0	0	0	0	4	0	0	3	0	5	3	0	0	0	0	0	0	0	0	0	0	0	0
G10099.3	14	-	5475	13	novel_not_in_catalog	ENSMUSG00000021796	novel	5956	13	coding	532	1599	395	1993	34169795	34136501	FALSE	TRUE	TRUE	Full	1	3	3.33721	0.312888	F	0	0	0	0	0	0	0	0	0	0	0	0	0	0	0	0	0	0	0	0	0	0	2	0
G10099.5	14	-	3375	13	novel_not_in_catalog	ENSMUSG00000021796	novel	5956	13	coding	532	1599	403	2001	34169795	34136501	FALSE	TRUE	TRUE	Full	7	3	4.12081	0.386356	T	2	0	4	0	0	0	0	0	3	2	0	0	0	0	0	0	0	0	0	0	0	0	0	0
G10099.7	14	-	3422	13	novel_not_in_catalog	ENSMUSG00000021796	novel	5956	13	coding	532	1599	452	2050	34169795	34136501	FALSE	TRUE	TRUE	Full	1	3	3.20782	0.300756	F	0	0	0	0	0	0	0	0	0	0	0	0	0	0	2	0	0	0	0	0	0	0	0	0
G10103.2	14	+	1269	3	antisense	novelGene_ENSMUSG00000021799_AS	novel	NA	NA	non_coding	NA	NA	NA	NA	NA	NA	NA	TRUE	TRUE	Full	1	1	3.1072	1	T	0	0	0	0	0	0	0	0	0	0	0	0	0	0	0	0	0	0	0	0	0	0	0	0
G10104.1	14	-	2240	11	fusion	ENSMUSG00000021798_ENSMUSG00000021799	novel	1586	8	coding	303	912	814	1725	34310354	34283742	FALSE	TRUE	TRUE	Full	1	11	3.49114	0.0578524	F	0	0	0	0	0	0	0	0	0	0	0	0	0	0	0	0	0	0	0	0	0	0	0	0
G10104.10	14	-	1455	5	novel_not_in_catalog	ENSMUSG00000021799	novel	2156	9	coding	231	696	356	1051	34317762	34314706	FALSE	TRUE	TRUE	Full	1	11	3.42035	0.0566793	F	0	0	0	0	0	0	0	0	0	0	0	0	0	0	0	0	2	0	0	0	0	0	0	0
G10104.11	14	-	1581	5	incomplete-splice_match	ENSMUSG00000021799	ENSMUST00000022331	2156	9	coding	297	894	301	1194	34318313	34314706	FALSE	TRUE	TRUE	Full	4	11	8.85981	0.146818	F	0	0	0	0	0	0	0	0	0	2	0	2	0	0	0	0	11	0	6	0	0	0	0	0
G10104.12	14	-	1389	5	novel_not_in_catalog	ENSMUSG00000021799	novel	2156	9	coding	194	585	653	1237	34316806	34314706	FALSE	TRUE	FALSE	Full	1	11	3.42035	0.0566793	F	0	0	0	0	0	0	0	0	0	0	0	0	0	0	0	0	2	0	0	0	0	0	0	0
G10104.13	14	-	1346	5	incomplete-splice_match	ENSMUSG00000021799	ENSMUST00000022331	2156	9	coding	297	894	301	1194	34318313	34314706	FALSE	TRUE	FALSE	Full	4	11	13.9933	0.231886	T	0	0	0	0	0	0	0	0	0	3	2	0	0	0	0	0	22	0	6	0	0	0	0	0
G10104.14	14	-	1239	5	novel_not_in_catalog	ENSMUSG00000021799	novel	2156	9	coding	231	696	392	1087	34317762	34314706	FALSE	TRUE	FALSE	Full	1	11	6.84071	0.113359	F	0	0	0	0	0	0	0	0	0	0	0	0	0	0	0	0	4	0	0	0	0	0	0	0
G10104.15	14	-	1071	4	incomplete-splice_match	ENSMUSG00000021799	ENSMUST00000022331	2156	9	coding	231	696	224	919	34317762	34314706	FALSE	TRUE	FALSE	Full	1	11	2.95845	0.049025	F	0	0	0	0	0	0	0	0	0	0	0	0	0	0	0	0	0	0	0	0	0	0	0	0
G10104.3	14	-	1607	8	novel_not_in_catalog	ENSMUSG00000021798	novel	1586	8	coding	327	984	110	1093	34310426	34283742	FALSE	TRUE	TRUE	Full	4	11	4.50252	0.0746121	F	3	0	0	0	0	0	0	0	0	0	0	0	2	0	2	0	3	0	0	0	0	0	0	0
G10104.4	14	-	1578	8	novel_not_in_catalog	ENSMUSG00000021798	novel	1586	8	coding	327	984	81	1064	34310426	34283742	FALSE	TRUE	TRUE	Full	27	11	6.90255	0.114384	F	2	0	2	0	0	3	0	0	3	4	0	2	4	5	5	0	0	9	3	6	5	4	9	6
G10104.5	14	-	1470	10	full-splice_match	ENSMUSG00000021798	ENSMUST00000227819	1499	10	coding	288	867	91	957	34310426	34283742	FALSE	TRUE	TRUE	Full	1	11	3.19754	0.0529871	F	0	0	0	0	0	0	0	0	0	0	0	0	0	0	0	0	0	2	0	0	0	0	0	0
G10104.6	14	-	1582	8	full-splice_match	ENSMUSG00000021798	ENSMUST00000022330	1586	8	coding	327	984	87	1070	34310426	34283742	FALSE	TRUE	TRUE	Full	1	11	2.75893	0.0457187	F	0	0	0	0	0	0	0	0	0	0	0	0	0	0	0	0	0	0	0	0	0	0	0	0
G10105.2	14	+	1600	2	novel_not_in_catalog	ENSMUSG00000115509	novel	1558	2	non_coding	NA	NA	NA	NA	NA	NA	NA	TRUE	TRUE	Full	1	1	3.07509	1	T	0	0	0	0	0	0	0	0	0	0	0	0	0	0	0	0	0	0	0	0	2	0	0	0
G10106.1	14	-	764	2	genic	ENSMUSG00000115007	novel	1299	1	non_coding	NA	NA	NA	NA	NA	NA	NA	TRUE	TRUE	FALSE	2	1	6.95879	1	T	0	0	0	0	0	0	0	0	0	0	0	0	0	0	0	0	0	0	0	0	0	0	0	0
G10107.1	14	+	4606	19	full-splice_match	ENSMUSG00000041408	ENSMUST00000048263	6351	19	coding	1200	3603	477	4079	34398933	34467647	FALSE	TRUE	TRUE	Full	2	1	4.03384	1	T	0	0	0	0	0	0	0	0	0	0	0	2	0	0	0	0	0	0	0	0	0	0	0	0
G1011.1	1	-	3150	7	novel_not_in_catalog	ENSMUSG00000038496	novel	2974	7	coding	488	1467	383	1849	83004099	82991540	FALSE	TRUE	TRUE	Full	2	6	3.24487	0.131683	F	0	0	0	0	0	2	0	0	0	0	0	0	0	0	0	0	0	0	0	0	0	0	0	0
G1011.10	1	-	2838	6	full-splice_match	ENSMUSG00000038496	ENSMUST00000164473	1550	6	coding	488	1467	83	1549	83004099	82991540	FALSE	TRUE	TRUE	Full	22	6	4.89329	0.19858	F	2	3	4	2	0	2	0	4	3	4	4	2	2	0	2	0	0	0	0	4	0	0	0	0
G1011.11	1	-	2986	6	novel_not_in_catalog	ENSMUSG00000038496	novel	1550	6	coding	488	1467	231	1697	83004099	82991540	FALSE	TRUE	TRUE	Full	1	6	2.95845	0.12006	F	0	0	0	0	0	0	0	0	0	0	0	0	0	0	0	0	0	0	0	0	0	0	0	0
G1011.7	1	-	3051	8	novel_not_in_catalog	ENSMUSG00000038496	novel	2974	7	coding	488	1467	296	1762	83004099	82991540	FALSE	TRUE	TRUE	Full	1	6	3.31681	0.134603	F	2	0	0	0	0	0	0	0	0	0	0	0	0	0	0	0	0	0	0	0	0	0	0	0
G1011.8	1	-	3067	8	novel_not_in_catalog	ENSMUSG00000038496	novel	2974	7	coding	488	1467	312	1778	83004099	82991540	FALSE	TRUE	TRUE	Full	1	6	3.59279	0.145802	F	0	0	0	0	0	0	0	0	0	0	2	0	0	0	0	0	0	0	0	0	0	0	0	0
G1011.9	1	-	2968	7	full-splice_match	ENSMUSG00000038496	ENSMUST00000045560	2974	7	coding	488	1467	213	1679	83004099	82991540	FALSE	TRUE	TRUE	Full	27	6	6.63526	0.269272	T	5	5	0	13	5	5	2	0	7	4	5	2	3	0	2	0	0	0	0	0	0	0	0	2
G10113.1	14	+	1680	2	novel_not_in_catalog	ENSMUSG00000097310	novel	3415	3	non_coding	NA	NA	NA	NA	NA	NA	NA	TRUE	TRUE	Full	5	1	6.05989	1	T	0	0	0	0	0	0	0	0	4	0	0	3	2	4	0	4	0	0	0	0	0	0	0	0
G10118.2	14	-	5355	7	full-splice_match	ENSMUSG00000058690	ENSMUST00000183316	1218	7	coding	189	570	25	594	36631093	36601656	FALSE	TRUE	TRUE	Full	3	4	4.04083	0.292367	T	0	0	0	0	2	0	0	0	3	0	0	0	0	0	0	0	0	0	0	0	0	0	0	0
G10118.3	14	-	2052	8	novel_not_in_catalog	ENSMUSG00000058690	novel	1218	7	coding	189	570	25	594	36631093	36601656	TRUE	TRUE	TRUE	Full	1	4	3.4856	0.252194	F	0	0	0	0	0	0	0	0	0	2	0	0	0	0	0	0	0	0	0	0	0	0	0	0
G10118.4	14	-	3656	12	novel_in_catalog	ENSMUSG00000058690	novel	7509	11	coding	836	2511	287	2797	36663182	36601656	FALSE	TRUE	TRUE	Full	1	4	3.09713	0.224087	F	0	2	0	0	0	0	0	0	0	0	0	0	0	0	0	0	0	0	0	0	0	0	0	0
G10118.5	14	-	1468	6	incomplete-splice_match	ENSMUSG00000058690	ENSMUST00000182042	1420	8	coding	186	561	80	640	36631093	36601625	FALSE	TRUE	TRUE	Full	1	4	3.19754	0.231352	F	0	0	0	0	0	0	0	0	0	0	0	0	0	0	0	0	0	2	0	0	0	0	0	0
G10119.2	14	-	4340	17	full-splice_match	ENSMUSG00000021803	ENSMUST00000022337	4332	17	coding	859	2580	214	2793	36820100	36801362	FALSE	TRUE	TRUE	Full	22	1	7.06687	1	T	17	3	5	3	0	0	0	0	6	0	8	0	0	2	2	0	0	3	0	0	0	2	0	2
G1012.3	1	+	1703	13	novel_not_in_catalog	ENSMUSG00000053161	novel	1651	13	coding	428	1287	38	1324	83137520	83187910	FALSE	TRUE	TRUE	Full	1	1	5.07382	1	T	0	0	0	0	0	3	0	0	0	0	0	0	0	0	0	0	0	0	0	0	0	0	0	0
G10120.1	14	-	690	2	novel_not_in_catalog	ENSMUSG00000096001	novel	705	3	non_coding	NA	NA	NA	NA	NA	NA	NA	TRUE	TRUE	Full	1	44	4.52449	0.00405083	F	0	0	0	0	0	0	0	0	0	0	0	0	0	0	0	0	0	0	0	0	0	0	0	0
G10120.10	14	-	3143	9	full-splice_match	ENSMUSG00000041028	ENSMUST00000042564	2573	9	coding	346	1041	271	1311	36855721	36844099	FALSE	TRUE	TRUE	Full	2	44	4.13715	0.00370404	F	0	0	0	0	0	0	3	0	0	0	0	0	0	0	0	0	0	0	0	0	0	0	0	0
G10120.11	14	-	2983	9	full-splice_match	ENSMUSG00000041028	ENSMUST00000165649	3188	9	coding	346	1041	112	1152	36855721	36844099	FALSE	TRUE	TRUE	Full	38	44	6.47765	0.00579952	F	4	5	4	8	5	8	4	3	3	2	3	3	4	4	5	3	0	2	4	6	2	5	2	0
G10120.12	14	-	3082	9	full-splice_match	ENSMUSG00000041028	ENSMUST00000042564	2573	9	coding	346	1041	257	1297	36855721	36844099	FALSE	TRUE	TRUE	Full	1	44	11.8389	0.0105995	F	0	0	0	0	0	7	0	0	0	0	0	0	0	0	0	0	0	0	0	0	0	0	0	0
G10120.13	14	-	2937	9	full-splice_match	ENSMUSG00000041028	ENSMUST00000165649	3188	9	coding	346	1041	112	1152	36855721	36844099	FALSE	TRUE	TRUE	Full	10	44	5.07962	0.00454784	F	0	0	0	0	0	9	4	0	0	4	0	0	0	0	0	0	0	2	2	2	0	2	0	0
G10120.15	14	-	1435	9	novel_not_in_catalog	ENSMUSG00000041028	novel	3188	9	coding	342	1029	138	1166	36855721	36842667	FALSE	TRUE	TRUE	Full	1	44	3.67691	0.00329198	F	0	0	0	0	0	0	2	0	0	0	0	0	0	0	0	0	0	0	0	0	0	0	0	0
G10120.16	14	-	2783	8	incomplete-splice_match	ENSMUSG00000041028	ENSMUST00000042564	2573	9	coding	346	1041	42	1082	36855721	36844099	FALSE	TRUE	TRUE	Full	3	44	4.16828	0.00373191	F	0	0	0	0	0	0	0	0	0	0	0	0	0	0	0	0	0	0	0	0	3	0	3	0
G10120.18	14	-	3191	9	novel_in_catalog	ENSMUSG00000041028	novel	3188	9	coding	346	1041	457	1497	36855721	36844099	FALSE	TRUE	TRUE	Full	3	44	3.71917	0.00332981	F	3	0	0	0	0	0	0	0	0	0	0	0	0	0	0	0	0	0	0	0	2	0	0	0
G10120.19	14	-	2942	9	full-splice_match	ENSMUSG00000041028	ENSMUST00000042564	2573	9	coding	346	1041	208	1248	36855721	36844099	FALSE	TRUE	TRUE	Full	10	44	4.17798	0.0037406	F	2	2	0	0	0	0	3	0	2	0	0	2	0	0	3	0	3	0	0	0	0	4	0	0
G10120.20	14	-	2846	9	full-splice_match	ENSMUSG00000041028	ENSMUST00000165649	3188	9	coding	346	1041	112	1152	36855721	36844099	FALSE	TRUE	TRUE	Full	44	44	14.668	0.0131324	F	8	7	12	19	12	20	6	4	12	16	13	18	9	5	9	4	11	7	6	8	14	10	14	3
G10120.22	14	-	3118	9	novel_in_catalog	ENSMUSG00000041028	novel	3188	9	coding	346	1041	426	1466	36855721	36844099	FALSE	TRUE	TRUE	Full	15	44	3.79438	0.00339715	F	0	2	2	0	2	0	2	0	2	0	3	0	0	0	0	0	0	0	0	4	2	2	0	0
G10120.23	14	-	1388	9	novel_not_in_catalog	ENSMUSG00000041028	novel	3188	9	coding	342	1029	141	1169	36855721	36842667	FALSE	TRUE	TRUE	Full	2	44	3.26254	0.00292099	F	0	0	0	0	0	0	0	2	0	0	0	0	0	0	0	0	0	0	0	0	0	0	0	0
G10120.25	14	-	2899	9	full-splice_match	ENSMUSG00000041028	ENSMUST00000042564	2573	9	coding	346	1041	208	1248	36855721	36844099	FALSE	TRUE	TRUE	Full	19	44	4.23571	0.00379228	F	4	2	0	2	2	2	5	3	2	0	0	2	0	0	0	0	0	0	2	2	2	2	0	0
G10120.26	14	-	2803	9	full-splice_match	ENSMUSG00000041028	ENSMUST00000165649	3188	9	coding	346	1041	112	1152	36855721	36844099	FALSE	TRUE	TRUE	Full	47	44	21.3393	0.0191053	F	6	11	23	28	32	27	13	8	24	28	25	27	10	9	19	5	17	9	10	13	18	15	21	4
G10120.27	14	-	2733	8	incomplete-splice_match	ENSMUSG00000041028	ENSMUST00000042564	2573	9	coding	346	1041	42	1082	36855721	36844099	FALSE	TRUE	TRUE	Full	4	44	3.33927	0.00298969	F	0	2	2	0	0	0	2	0	0	0	0	0	0	0	0	0	2	0	0	0	0	0	0	0
G10120.28	14	-	1249	7	novel_not_in_catalog	ENSMUSG00000041028	novel	3188	9	coding	232	699	112	810	36855721	36843213	FALSE	TRUE	TRUE	Full	1	44	3.50876	0.00314143	F	0	0	0	0	0	0	0	2	0	0	0	0	0	0	0	0	0	0	0	0	0	0	0	0
G10120.3	14	-	1790	10	fusion	ENSMUSG00000041028_ENSMUSG00000096001	novel	1102	6	coding	337	1014	208	1221	36855721	36829354	FALSE	TRUE	TRUE	Full	1	44	3.1627	0.0028316	F	0	0	2	0	0	0	0	0	0	0	0	0	0	0	0	0	0	0	0	0	0	0	0	0
G10120.39	14	-	2486	9	novel_not_in_catalog	ENSMUSG00000041028	novel	3188	9	coding	346	1041	121	1161	36855721	36844099	FALSE	TRUE	TRUE	Full	1	44	3.1627	0.0028316	F	0	0	2	0	0	0	0	0	0	0	0	0	0	0	0	0	0	0	0	0	0	0	0	0
G10120.4	14	-	1726	10	fusion	ENSMUSG00000041028_ENSMUSG00000096001	novel	1102	6	coding	337	1014	144	1157	36855721	36829354	FALSE	TRUE	TRUE	Full	1	44	3.36131	0.00300942	F	0	0	0	0	2	0	0	0	0	0	0	0	0	0	0	0	0	0	0	0	0	0	0	0
G10120.40	14	-	2751	9	novel_in_catalog	ENSMUSG00000041028	novel	2573	9	coding	346	1041	386	1426	36855721	36844099	FALSE	TRUE	TRUE	Full	44	44	41.5834	0.0372301	F	33	49	50	32	26	22	48	21	17	30	19	25	9	42	19	5	31	27	18	34	35	50	43	16
G10120.41	14	-	2573	9	full-splice_match	ENSMUSG00000041028	ENSMUST00000042564	2573	9	coding	346	1041	208	1248	36855721	36844099	FALSE	TRUE	TRUE	Full	44	44	75.2114	0.0673376	F	42	53	72	33	38	59	54	27	42	57	29	40	20	81	42	24	42	39	24	39	36	52	34	15
G10120.42	14	-	2462	9	full-splice_match	ENSMUSG00000041028	ENSMUST00000165649	3188	9	coding	346	1041	97	1137	36855721	36844099	FALSE	TRUE	TRUE	Full	45	44	538.35	0.481991	T	220	302	315	445	605	536	336	206	367	458	372	364	251	358	372	246	263	281	263	359	366	327	402	170
G10120.43	14	-	2554	9	novel_not_in_catalog	ENSMUSG00000041028	novel	3188	9	coding	346	1041	189	1229	36855721	36844099	FALSE	TRUE	TRUE	Full	1	44	2.75893	0.0024701	F	0	0	0	0	0	0	0	0	0	0	0	0	0	0	0	0	0	0	0	0	0	0	0	0
G10120.44	14	-	2407	8	incomplete-splice_match	ENSMUSG00000041028	ENSMUST00000042564	2573	9	coding	346	1041	42	1082	36855721	36844099	FALSE	TRUE	TRUE	Full	24	44	148.174	0.132662	F	0	0	2	3	6	3	0	44	0	0	0	0	0	0	0	0	21	6	0	0	0	37	2	24
G10120.45	14	-	2394	8	novel_in_catalog	ENSMUSG00000041028	novel	3188	9	coding	217	654	416	1069	36852691	36844099	FALSE	TRUE	TRUE	Full	2	44	3.47408	0.00311039	F	0	0	0	0	0	0	0	0	0	0	0	0	0	0	0	0	0	0	0	0	0	0	0	0
G10120.46	14	-	3237	8	novel_in_catalog	ENSMUSG00000041028	novel	3188	9	coding	217	654	1259	1912	36852691	36844099	FALSE	TRUE	TRUE	Full	1	44	3.06646	0.00274544	F	0	0	0	0	0	0	0	0	0	0	0	0	0	0	0	0	0	0	0	0	0	2	0	0
G10120.48	14	-	1583	2	incomplete-splice_match	ENSMUSG00000041028	ENSMUST00000042564	2573	9	non_coding	NA	NA	NA	NA	NA	NA	NA	TRUE	TRUE	Full	26	44	9.83022	0.00880112	F	0	0	0	4	14	4	0	13	3	0	2	2	2	2	0	12	7	2	13	7	2	7	0	2
G10120.5	14	-	3405	9	full-splice_match	ENSMUSG00000041028	ENSMUST00000165649	3188	9	coding	346	1041	176	1216	36855721	36844099	FALSE	TRUE	TRUE	Full	3	44	3.28101	0.00293753	F	0	0	0	0	0	0	0	0	0	0	2	0	0	0	0	0	0	0	0	0	0	0	0	0
G10120.53	14	-	2457	9	full-splice_match	ENSMUSG00000041028	ENSMUST00000165649	3188	9	coding	346	1041	141	1181	36855721	36844099	FALSE	TRUE	TRUE	Full	1	44	3.32437	0.00297635	F	0	0	0	0	0	0	0	0	0	0	0	0	0	0	0	0	0	0	0	0	0	0	0	0
G10120.54	14	-	2388	9	full-splice_match	ENSMUSG00000041028	ENSMUST00000165649	3188	9	coding	346	1041	169	1209	36855721	36844099	FALSE	TRUE	TRUE	Full	1	44	3.17608	0.00284358	F	0	0	0	0	0	0	0	0	0	0	0	0	0	0	0	0	0	0	2	0	0	0	0	0
G10120.55	14	-	1408	8	incomplete-splice_match	ENSMUSG00000041028	ENSMUST00000042564	2573	9	coding	346	1041	42	1082	36855721	36844099	FALSE	TRUE	TRUE	Full	1	44	3.01633	0.00270055	F	0	0	0	0	0	0	0	0	0	0	0	0	0	0	0	0	0	0	0	0	0	0	0	0
G10120.56	14	-	1636	9	full-splice_match	ENSMUSG00000041028	ENSMUST00000042564	2573	9	coding	346	1041	271	1311	36855721	36844099	FALSE	TRUE	TRUE	Full	2	44	3.90009	0.0034918	F	0	0	0	0	0	0	0	0	0	0	0	0	0	0	0	0	0	0	0	0	0	0	0	0
G10120.57	14	-	1424	9	full-splice_match	ENSMUSG00000041028	ENSMUST00000165649	3188	9	coding	346	1041	112	1152	36855721	36844099	FALSE	TRUE	TRUE	Full	44	44	10.2729	0.00919747	F	2	0	3	9	7	2	7	8	3	10	4	3	6	6	9	6	2	6	9	8	0	0	2	3
G10120.58	14	-	1599	9	full-splice_match	ENSMUSG00000041028	ENSMUST00000042564	2573	9	coding	346	1041	289	1329	36855721	36844099	FALSE	TRUE	TRUE	Full	1	44	3.69006	0.00330376	F	0	0	0	0	0	0	0	0	0	0	0	0	0	0	0	0	0	0	0	0	0	0	0	0
G10120.6	14	-	3298	9	full-splice_match	ENSMUSG00000041028	ENSMUST00000165649	3188	9	coding	346	1041	139	1179	36855721	36844099	FALSE	TRUE	TRUE	Full	2	44	3.24309	0.00290358	F	0	0	0	2	0	0	0	0	0	2	0	0	0	0	0	0	0	0	0	0	0	0	0	0
G10120.62	14	-	1666	9	novel_in_catalog	ENSMUSG00000041028	novel	2573	9	coding	346	1041	435	1475	36855721	36844099	FALSE	TRUE	TRUE	Full	41	44	9.15379	0.0081955	F	0	7	7	3	5	2	9	9	4	8	9	2	4	9	3	3	7	6	4	6	6	4	7	4
G10120.63	14	-	1439	9	full-splice_match	ENSMUSG00000041028	ENSMUST00000042564	2573	9	coding	346	1041	208	1248	36855721	36844099	FALSE	TRUE	TRUE	Full	41	44	17.1376	0.0153435	F	4	6	7	5	12	6	6	6	7	12	2	8	4	19	4	8	10	5	5	9	5	7	8	3
G10120.64	14	-	1343	9	full-splice_match	ENSMUSG00000041028	ENSMUST00000165649	3188	9	coding	346	1041	112	1152	36855721	36844099	FALSE	TRUE	TRUE	Full	48	44	96.3082	0.0862259	F	50	43	48	57	86	49	52	79	42	63	38	50	56	74	55	87	44	56	92	53	48	53	28	51
G10120.65	14	-	1273	8	incomplete-splice_match	ENSMUSG00000041028	ENSMUST00000042564	2573	9	coding	346	1041	42	1082	36855721	36844099	FALSE	TRUE	TRUE	Full	19	44	7.81573	0.00699752	F	0	3	0	0	5	0	6	6	0	0	0	2	0	0	0	0	0	2	0	9	3	0	0	0
G10120.66	14	-	2824	8	novel_in_catalog	ENSMUSG00000041028	novel	3188	9	coding	202	609	97	705	36855721	36849530	TRUE	TRUE	TRUE	Full	1	44	3.06646	0.00274544	F	0	0	0	0	0	0	0	0	0	0	0	0	0	0	0	0	0	0	0	0	0	2	0	0
G10120.67	14	-	1744	4	full-splice_match	ENSMUSG00000041028	ENSMUST00000223921	601	4	coding	115	348	176	523	36855721	36853491	FALSE	TRUE	FALSE	Full	1	44	3.36102	0.00300916	F	0	0	0	0	0	0	0	0	0	0	0	0	0	0	0	0	0	0	0	0	0	0	0	0
G10120.7	14	-	3568	9	novel_in_catalog	ENSMUSG00000041028	novel	3188	9	coding	346	1041	482	1522	36855721	36844099	FALSE	TRUE	TRUE	Full	1	44	2.79612	0.0025034	F	0	0	0	0	0	0	0	0	0	0	0	0	0	2	0	0	0	0	0	0	0	0	0	0
G10120.8	14	-	3335	9	full-splice_match	ENSMUSG00000041028	ENSMUST00000042564	2573	9	coding	346	1041	249	1289	36855721	36844099	FALSE	TRUE	TRUE	Full	3	44	3.66934	0.0032852	F	0	0	0	0	0	0	0	0	0	0	0	0	0	2	0	0	0	0	0	0	0	0	0	0
G10120.9	14	-	3198	9	full-splice_match	ENSMUSG00000041028	ENSMUST00000165649	3188	9	coding	346	1041	112	1152	36855721	36844099	FALSE	TRUE	TRUE	Full	26	44	5.63333	0.00504359	F	4	4	0	3	4	3	4	0	8	3	4	0	0	0	3	0	0	0	0	4	3	0	2	0
G10121.5	14	+	946	3	antisense	novelGene_ENSMUSG00000114675_AS	novel	NA	NA	coding	54	165	137	301	36944849	36990259	FALSE	TRUE	TRUE	Full	1	3	4.4542	0.299085	F	0	0	0	0	0	0	0	0	0	0	0	0	0	0	0	0	0	0	0	0	0	0	0	0
G10121.6	14	+	874	2	antisense	novelGene_ENSMUSG00000114675_AS	novel	NA	NA	non_coding	NA	NA	NA	NA	NA	NA	NA	TRUE	TRUE	Full	2	3	3.20819	0.215419	F	0	0	0	0	0	0	0	0	0	0	0	0	0	0	0	0	0	0	0	0	0	0	0	0
G10121.9	14	+	851	2	intergenic	novelGene_2_63	novel	NA	NA	non_coding	NA	NA	NA	NA	NA	NA	NA	TRUE	TRUE	Full	4	3	7.23039	0.485496	T	0	0	0	0	0	0	0	0	0	0	0	0	0	0	0	0	0	0	0	0	0	0	0	0
G10125.3	14	-	2358	5	incomplete-splice_match	ENSMUSG00000041014	ENSMUST00000166968	4011	10	coding	294	885	47	931	38119213	38092490	FALSE	TRUE	TRUE	Full	1	1	4.4542	1	T	0	0	0	0	0	0	0	0	0	0	0	0	0	0	0	0	0	0	0	0	0	0	0	0
G1013.4	1	-	3918	6	full-splice_match	ENSMUSG00000026163	ENSMUST00000159078	5888	6	coding	685	2058	180	2237	83254741	83234848	FALSE	FALSE	TRUE	Full	5	5	3.4834	0.188645	F	0	2	0	0	0	0	0	0	2	0	0	0	0	0	0	0	0	0	0	0	0	0	2	0
G1013.5	1	-	6948	12	novel_in_catalog	ENSMUSG00000026163	novel	8154	11	coding	1687	5064	204	5267	83385732	83234848	FALSE	TRUE	TRUE	Full	1	5	3.59279	0.194569	F	0	0	0	0	0	0	0	0	0	0	2	0	0	0	0	0	0	0	0	0	0	0	0	0
G1013.6	1	-	3869	5	incomplete-splice_match	ENSMUSG00000026163	ENSMUST00000160953	8154	11	coding	656	1971	218	2188	83254741	83234848	FALSE	TRUE	TRUE	Full	15	5	4.10356	0.22223	T	2	0	2	2	4	2	2	0	4	2	2	4	2	0	2	0	0	0	0	0	0	0	0	0
G1013.7	1	-	6940	12	novel_in_catalog	ENSMUSG00000026163	novel	8154	11	coding	1683	5052	208	5259	83385728	83234848	FALSE	TRUE	TRUE	Full	2	5	4.04912	0.219282	F	0	0	0	0	0	0	0	0	0	2	0	0	0	0	0	0	0	0	0	0	3	0	0	0
G1013.9	1	-	737	6	incomplete-splice_match	ENSMUSG00000026163	ENSMUST00000053075	5757	10	coding	146	438	300	737	83385728	83266555	FALSE	TRUE	FALSE	Full	2	5	3.23652	0.175275	F	2	0	0	0	0	0	0	0	0	0	0	0	0	0	0	0	0	0	0	0	0	0	0	0
G10175.4	14	-	2428	9	full-splice_match	ENSMUSG00000037824	ENSMUST00000047652	2475	9	coding	270	813	79	891	40656225	40630015	FALSE	TRUE	TRUE	Full	48	3	23.3834	0.775088	T	23	23	20	23	7	10	6	5	20	3	15	7	7	12	13	2	27	20	3	22	19	19	20	18
G10175.5	14	-	2339	8	novel_in_catalog	ENSMUSG00000037824	novel	2475	9	coding	204	615	188	802	40638840	40630015	FALSE	TRUE	TRUE	Full	4	3	3.44809	0.114294	F	0	0	0	0	0	0	0	0	0	2	0	0	0	0	0	0	2	0	0	0	0	0	0	0
G10175.7	14	-	1679	9	full-splice_match	ENSMUSG00000037824	ENSMUST00000047652	2475	9	coding	270	813	129	941	40656225	40630015	FALSE	TRUE	FALSE	Full	1	3	3.33721	0.110618	F	0	0	0	0	0	0	0	0	0	0	0	0	0	0	0	0	0	0	0	0	0	0	2	0
G10176.10	14	-	1616	6	full-splice_match	ENSMUSG00000021792	ENSMUST00000136661	695	6	coding	225	678	152	829	40730158	40716481	FALSE	FALSE	TRUE	Full	9	22	4.69894	0.00426719	F	0	2	0	0	0	0	0	0	0	0	2	0	0	0	4	2	0	0	0	0	0	0	0	0
G10176.12	14	-	1553	6	full-splice_match	ENSMUSG00000021792	ENSMUST00000022317	1537	6	coding	218	657	110	766	40726142	40716481	FALSE	TRUE	TRUE	Full	40	22	256.264	0.232719	F	99	110	154	101	121	100	150	151	83	121	136	92	79	175	121	146	188	156	139	179	152	229	171	122
G10176.13	14	-	1667	7	novel_in_catalog	ENSMUSG00000021792	novel	1567	6	coding	229	690	191	880	40726175	40716481	FALSE	TRUE	TRUE	Full	1	22	2.79612	0.00253921	F	0	0	0	0	0	0	0	0	0	0	0	0	0	2	0	0	0	0	0	0	0	0	0	0
G10176.17	14	-	1570	6	full-splice_match	ENSMUSG00000021792	ENSMUST00000118466	1567	6	coding	229	690	94	783	40726175	40716481	FALSE	TRUE	TRUE	Full	40	22	186.067	0.168971	F	74	78	96	92	107	89	113	92	66	96	25	112	75	125	128	121	129	125	108	141	107	123	121	95
G10176.18	14	-	1533	5	full-splice_match	ENSMUSG00000021792	ENSMUST00000153830	1003	5	coding	229	690	57	746	40726175	40716481	FALSE	TRUE	TRUE	Full	39	22	13.9504	0.0126687	F	24	9	9	14	13	5	19	11	5	5	0	3	2	29	9	8	5	13	0	5	12	14	4	2
G10176.19	14	-	1379	5	novel_in_catalog	ENSMUSG00000021792	novel	1567	6	coding	152	459	134	592	40724431	40716481	FALSE	TRUE	TRUE	Full	1	22	4.38121	0.00397866	F	0	0	0	0	0	0	0	0	0	0	0	0	0	0	0	0	0	0	0	0	0	0	0	2
G10176.21	14	-	1434	5	novel_not_in_catalog	ENSMUSG00000021792	novel	1003	5	coding	152	459	190	648	40724431	40716481	FALSE	TRUE	TRUE	Full	4	22	3.21453	0.00291917	F	0	0	0	0	0	0	0	0	0	0	0	0	0	0	0	0	0	0	0	0	2	0	0	0
G10176.23	14	-	1717	7	novel_not_in_catalog	ENSMUSG00000021792	novel	1537	6	coding	199	600	140	739	40726136	40716808	TRUE	TRUE	TRUE	Full	1	22	4.28632	0.00389249	F	0	0	0	0	0	0	0	0	0	0	0	0	0	0	0	0	0	0	0	3	0	0	0	0
G10176.26	14	-	1408	6	novel_not_in_catalog	ENSMUSG00000021792	novel	1567	6	coding	152	459	199	657	40724431	40716481	FALSE	TRUE	TRUE	Full	1	22	3.62379	0.00329083	F	0	0	0	0	0	0	0	0	0	0	0	0	0	0	0	0	0	0	0	0	0	0	0	0
G10176.27	14	-	1636	6	novel_in_catalog	ENSMUSG00000021792	novel	1537	6	coding	216	651	235	885	40726136	40716481	FALSE	TRUE	TRUE	Full	2	22	3.69403	0.00335462	F	0	0	0	0	0	0	0	0	0	0	0	0	0	0	0	0	0	0	0	0	0	0	0	0
G10176.28	14	-	1585	6	novel_in_catalog	ENSMUSG00000021792	novel	1537	6	coding	216	651	184	834	40726136	40716481	FALSE	TRUE	TRUE	Full	7	22	41.9172	0.0380658	F	0	0	0	0	0	0	0	0	0	0	0	0	0	0	0	0	0	0	0	0	0	0	0	0
G10176.29	14	-	1513	6	full-splice_match	ENSMUSG00000021792	ENSMUST00000022317	1537	6	coding	218	657	106	762	40726142	40716481	FALSE	TRUE	TRUE	Full	10	22	267.906	0.243291	T	0	0	0	0	0	0	0	0	0	0	0	0	0	0	0	0	0	0	0	0	0	0	0	0
G10176.31	14	-	1602	6	novel_in_catalog	ENSMUSG00000021792	novel	1567	6	coding	229	690	162	851	40726175	40716481	FALSE	TRUE	TRUE	Full	8	22	44.2599	0.0401933	F	0	0	0	0	0	0	0	0	0	0	0	0	0	0	0	0	0	0	0	0	0	0	0	0
G10176.32	14	-	1530	6	full-splice_match	ENSMUSG00000021792	ENSMUST00000118466	1567	6	coding	229	690	90	779	40726175	40716481	FALSE	TRUE	TRUE	Full	8	22	230.584	0.209398	F	0	0	0	0	0	0	0	0	0	0	0	0	0	0	0	0	0	0	0	0	0	0	0	0
G10176.33	14	-	1942	5	full-splice_match	ENSMUSG00000021792	ENSMUST00000153830	1003	5	coding	229	690	502	1191	40726175	40716481	FALSE	FALSE	TRUE	Full	2	22	7.05285	0.00640483	F	0	0	0	0	0	0	0	0	0	0	0	0	0	0	0	0	0	0	0	0	0	0	0	0
G10176.34	14	-	1471	6	full-splice_match	ENSMUSG00000021792	ENSMUST00000022317	1537	6	coding	218	657	126	782	40726142	40716481	FALSE	TRUE	TRUE	Full	9	22	4.23273	0.00384383	F	0	0	2	0	0	0	0	0	0	0	0	0	0	0	0	2	2	0	0	0	0	3	3	0
G10176.35	14	-	1495	6	full-splice_match	ENSMUSG00000021792	ENSMUST00000118466	1567	6	coding	229	690	117	806	40726175	40716481	FALSE	TRUE	TRUE	Full	4	22	3.60998	0.0032783	F	0	0	0	0	2	0	0	0	0	0	0	0	0	0	0	0	0	0	0	2	0	3	0	0
G10176.36	14	-	506	4	incomplete-splice_match	ENSMUSG00000021792	ENSMUST00000022317	1537	6	coding	124	372	134	505	40726142	40720807	FALSE	TRUE	TRUE	Full	2	22	3.14145	0.00285281	F	0	0	0	0	0	0	0	0	0	0	0	0	0	0	2	0	0	0	0	0	2	0	0	0
G10176.37	14	-	514	4	incomplete-splice_match	ENSMUSG00000021792	ENSMUST00000118466	1567	6	coding	135	405	109	513	40726175	40720807	FALSE	TRUE	TRUE	Full	1	22	3.46801	0.00314937	F	0	0	0	0	0	0	0	0	0	0	0	0	0	0	0	0	0	0	0	0	0	0	0	0
G10176.4	14	-	1212	3	incomplete-splice_match	ENSMUSG00000021792	ENSMUST00000153830	1003	5	coding	134	405	17	421	40720926	40716481	FALSE	TRUE	TRUE	Full	2	22	4.23446	0.00384539	F	0	0	0	0	0	0	0	0	0	0	0	0	0	2	0	3	0	0	0	0	0	0	0	0
G10176.5	14	-	1303	4	novel_in_catalog	ENSMUSG00000021792	novel	1567	6	coding	134	405	110	514	40720926	40716481	FALSE	TRUE	TRUE	Full	1	22	3.62138	0.00328865	F	0	0	0	0	0	0	0	0	0	0	0	0	0	0	0	0	0	0	0	0	0	0	0	0
G10176.7	14	-	1066	2	incomplete-splice_match	ENSMUSG00000021792	ENSMUST00000153830	1003	5	non_coding	NA	NA	NA	NA	NA	NA	NA	TRUE	TRUE	Full	5	22	4.17189	0.00378857	F	0	0	0	0	2	0	0	0	0	0	0	0	0	0	0	0	0	0	0	0	0	0	0	2
G10177.1	14	-	746	5	novel_not_in_catalog	ENSMUSG00000021791	novel	818	4	coding	139	420	140	559	40784452	40771258	FALSE	TRUE	TRUE	Full	1	3	4.46277	0.389221	T	0	0	0	0	0	0	0	0	0	0	0	0	0	0	0	0	0	0	0	0	0	0	0	0
G10177.2	14	-	861	5	novel_not_in_catalog	ENSMUSG00000021791	novel	818	4	coding	139	420	260	679	40784452	40771258	FALSE	TRUE	TRUE	Full	8	3	3.92805	0.342585	F	0	0	0	0	2	0	0	2	0	0	0	0	0	3	0	0	0	0	0	0	0	0	0	0
G10177.3	14	-	784	4	novel_not_in_catalog	ENSMUSG00000021791	novel	818	4	coding	139	420	183	602	40784452	40771258	FALSE	TRUE	TRUE	Full	1	3	3.07509	0.268194	F	0	0	0	0	0	0	0	0	0	0	0	0	0	0	0	0	0	0	0	0	2	0	0	0
G10179.10	14	+	2411	7	novel_not_in_catalog	ENSMUSG00000091110	novel	1760	5	coding	148	447	785	1231	41000917	41003770	FALSE	TRUE	TRUE	Full	2	16	3.90192	0.0657212	F	0	0	0	0	0	0	0	0	0	0	0	0	0	0	0	0	0	0	0	0	0	0	0	0
G10179.11	14	+	2256	6	novel_not_in_catalog	ENSMUSG00000091110	novel	1760	5	coding	206	621	468	1088	40987331	41003770	FALSE	TRUE	TRUE	Full	1	16	3.14305	0.0529393	F	0	0	0	0	0	0	0	0	0	0	0	0	0	0	0	0	0	0	0	0	0	0	0	0
G10179.15	14	+	1758	6	novel_not_in_catalog	ENSMUSG00000091110	novel	1760	5	coding	196	591	349	939	40987331	41003770	FALSE	TRUE	TRUE	Full	3	16	2.86793	0.0483053	F	0	0	0	0	0	0	0	0	0	0	0	0	0	0	0	0	0	0	0	0	0	0	0	0
G10179.16	14	+	1791	6	fusion	ENSMUSG00000094925_ENSMUSG00000090440	novel	1751	5	coding	178	537	451	987	41068060	41073568	FALSE	TRUE	TRUE	Full	3	16	4.35283	0.0733159	F	0	0	0	0	0	0	0	0	0	0	0	0	0	0	0	0	0	0	0	0	0	0	0	0
G10179.17	14	+	1893	7	novel_not_in_catalog	ENSMUSG00000090440	novel	1757	5	coding	250	753	345	1097	40987331	41298143	FALSE	TRUE	TRUE	Full	2	16	7.05394	0.118812	T	0	0	0	0	0	0	0	0	0	0	0	0	0	0	0	0	0	0	0	0	0	0	0	0
G10179.18	14	+	2231	7	novel_not_in_catalog	ENSMUSG00000090440	novel	1757	5	coding	250	753	345	1097	40987331	41298143	FALSE	TRUE	TRUE	Full	1	16	3.14305	0.0529393	F	0	0	0	0	0	0	0	0	0	0	0	0	0	0	0	0	0	0	0	0	0	0	0	0
G10179.19	14	+	1591	5	novel_not_in_catalog	ENSMUSG00000090440	novel	1757	5	coding	181	546	451	996	41292653	41302319	FALSE	TRUE	TRUE	Full	1	16	3.14305	0.0529393	F	0	0	0	0	0	0	0	0	0	0	0	0	0	0	0	0	0	0	0	0	0	0	0	0
G10179.20	14	+	1851	7	fusion	ENSMUSG00000091110_ENSMUSG00000094925	novel	1760	5	coding	155	468	588	1055	41000917	41073568	FALSE	TRUE	TRUE	Full	1	16	3.1072	0.0523354	F	0	0	0	0	0	0	0	0	0	0	0	0	0	0	0	0	0	0	0	0	0	0	0	0
G10179.21	14	+	1860	7	novel_not_in_catalog	ENSMUSG00000090440	novel	1757	5	coding	250	753	304	1056	40987331	41298143	FALSE	TRUE	TRUE	Full	1	16	3.14305	0.0529393	F	0	0	0	0	0	0	0	0	0	0	0	0	0	0	0	0	0	0	0	0	0	0	0	0
G10179.22	14	+	1726	6	novel_not_in_catalog	ENSMUSG00000094925	novel	1751	5	coding	213	642	295	936	40987331	41073568	FALSE	TRUE	TRUE	Full	2	16	4.93913	0.0831911	F	0	0	0	0	0	0	0	0	0	0	0	0	0	0	0	0	0	0	0	0	0	0	0	0
G10179.23	14	+	1842	7	novel_not_in_catalog	ENSMUSG00000091110	novel	1760	5	coding	148	447	576	1022	41000917	41003770	FALSE	TRUE	TRUE	Full	1	16	3.36102	0.0566106	F	0	0	0	0	0	0	0	0	0	0	0	0	0	0	0	0	0	0	0	0	0	0	0	0
G10179.24	14	+	1740	6	novel_not_in_catalog	ENSMUSG00000091110	novel	1760	5	coding	206	621	292	912	40987331	41003770	FALSE	TRUE	TRUE	Full	1	16	3.01633	0.0508049	F	0	0	0	0	0	0	0	0	0	0	0	0	0	0	0	0	0	0	0	0	0	0	0	0
G10179.25	14	+	1138	2	novel_not_in_catalog	ENSMUSG00000091110	novel	1760	5	non_coding	NA	NA	NA	NA	NA	NA	NA	TRUE	TRUE	Full	1	16	3.32437	0.0559934	F	0	0	0	0	0	0	0	0	0	0	0	0	0	0	0	0	0	0	0	0	0	0	0	0
G10179.26	14	+	1683	6	fusion	ENSMUSG00000094925_ENSMUSG00000090440	novel	1751	5	coding	178	537	346	882	41068060	41073568	FALSE	TRUE	TRUE	Full	1	16	3.01633	0.0508049	F	0	0	0	0	0	0	0	0	0	0	0	0	0	0	0	0	0	0	0	0	0	0	0	0
G10179.5	14	+	2093	8	novel_not_in_catalog	ENSMUSG00000090440	novel	1757	5	coding	250	753	546	1298	40987331	41298143	FALSE	TRUE	TRUE	Full	1	16	3.14305	0.0529393	F	0	0	0	0	0	0	0	0	0	0	0	0	0	0	0	0	0	0	0	0	0	0	0	0
G10179.7	14	+	2397	8	novel_not_in_catalog	ENSMUSG00000091110	novel	1760	5	coding	148	447	764	1210	41000917	41003770	FALSE	TRUE	TRUE	Full	1	16	4.71458	0.079409	F	0	0	0	0	0	0	0	0	0	0	0	0	0	0	0	0	0	0	0	0	0	0	0	0
G1018.3	1	-	2983	3	full-splice_match	ENSMUSG00000045658	ENSMUST00000168574	2664	3	coding	217	654	242	895	84262091	84015752	FALSE	TRUE	TRUE	Full	10	4	5.10868	0.0674507	F	0	2	0	0	0	0	0	0	0	0	0	0	0	4	3	0	0	3	0	0	2	0	0	0
G1018.4	1	-	2597	3	full-splice_match	ENSMUSG00000045658	ENSMUST00000168574	2664	3	coding	217	654	209	862	84262091	84015752	FALSE	TRUE	TRUE	Full	45	4	21.3674	0.282117	F	10	17	13	19	16	16	15	8	22	20	11	9	13	18	12	5	2	17	9	18	16	15	12	8
G1018.7	1	-	2503	3	full-splice_match	ENSMUSG00000045658	ENSMUST00000168574	2664	3	coding	217	654	209	862	84262091	84015752	FALSE	TRUE	TRUE	Full	48	4	46.1575	0.609424	T	23	29	26	31	21	39	16	15	21	42	24	27	6	32	28	6	26	31	11	29	17	23	25	16
G1018.8	1	-	1573	3	full-splice_match	ENSMUSG00000045658	ENSMUST00000168574	2664	3	coding	217	654	276	929	84262091	84015752	FALSE	TRUE	TRUE	Full	2	4	3.10588	0.0410074	F	0	0	0	0	0	0	0	0	0	0	0	0	0	0	0	0	0	0	0	0	0	2	0	0
G10180.3	14	+	994	2	intergenic	novelGene_2_64	novel	NA	NA	non_coding	NA	NA	NA	NA	NA	NA	NA	TRUE	TRUE	Full	1	1	4.43767	1	T	0	0	0	0	0	0	0	0	0	0	0	0	0	0	0	0	0	0	0	0	0	0	0	0
G10183.1	14	+	930	2	intergenic	novelGene_2_65	novel	NA	NA	non_coding	NA	NA	NA	NA	NA	NA	NA	TRUE	FALSE	Full	1	5	3.4856	0.180181	F	0	0	0	0	0	0	0	0	0	2	0	0	0	0	0	0	0	0	0	0	0	0	0	0
G10183.2	14	+	1272	3	intergenic	novelGene_2_66	novel	NA	NA	coding	125	378	372	749	41956788	41961890	FALSE	TRUE	TRUE	Full	2	5	4.54859	0.23513	T	0	0	0	0	0	0	0	0	0	0	0	0	0	0	0	0	0	0	0	0	0	0	0	0
G10183.3	14	+	731	3	intergenic	novelGene_2_67	novel	NA	NA	coding	113	342	354	695	41956788	41961613	FALSE	TRUE	TRUE	Full	4	5	3.32624	0.171943	F	0	0	0	2	0	0	0	0	0	0	0	0	0	0	0	0	0	0	0	0	0	0	0	0
G10183.4	14	+	598	2	intergenic	novelGene_2_68	novel	NA	NA	coding	113	342	221	562	41956788	41961613	FALSE	TRUE	TRUE	Full	7	5	4.30765	0.222675	F	2	0	3	0	0	0	0	0	0	0	0	0	2	0	2	0	0	0	0	0	0	0	0	0
G10183.6	14	+	560	2	intergenic	novelGene_2_69	novel	NA	NA	coding	119	360	165	524	41956788	41961613	FALSE	TRUE	TRUE	Full	1	5	3.67691	0.19007	F	0	0	0	0	0	0	2	0	0	0	0	0	0	0	0	0	0	0	0	0	0	0	0	0
G10186.1	14	+	1916	2	intergenic	novelGene_2_70	novel	NA	NA	coding	112	339	3	341	42597697	42598035	TRUE	TRUE	TRUE	Full	1	1	3.59279	1	T	0	0	0	0	0	0	0	0	0	0	2	0	0	0	0	0	0	0	0	0	0	0	0	0
G10187.2	14	+	1631	6	fusion	ENSMUSG00000094151_ENSMUSG00000114317	novel	1761	5	coding	158	477	546	1022	43037479	43044498	FALSE	TRUE	TRUE	Full	1	4	4.6608	0.28335	F	0	0	0	0	0	0	0	0	0	0	0	0	0	0	0	0	0	0	0	0	0	0	0	0
G10187.4	14	+	2028	8	fusion	ENSMUSG00000094151_ENSMUSG00000114619	novel	1761	5	coding	158	477	943	1419	43037479	43044498	FALSE	TRUE	TRUE	Full	1	4	5.9169	0.359714	T	0	0	0	0	0	0	0	0	0	0	0	0	0	0	0	0	0	0	0	0	0	0	0	0
G10187.5	14	+	1508	4	fusion	ENSMUSG00000094151_ENSMUSG00000114619	novel	1241	3	coding	103	312	588	899	43039362	43044498	FALSE	TRUE	TRUE	Full	1	4	3.07509	0.186948	F	0	0	0	0	0	0	0	0	0	0	0	0	0	0	0	0	0	0	0	0	2	0	0	0
G10187.8	14	+	1613	5	novel_in_catalog	ENSMUSG00000114544	novel	674	3	coding	115	348	230	577	43108314	43117041	TRUE	TRUE	TRUE	Full	1	4	2.79612	0.169988	F	0	0	0	0	0	0	0	0	0	0	0	0	0	2	0	0	0	0	0	0	0	0	0	0
G10191.1	14	-	539	3	genic	ENSMUSG00000089654	novel	451	1	non_coding	NA	NA	NA	NA	NA	NA	NA	TRUE	TRUE	Full	1	1	5.20201	1	T	0	0	0	0	0	0	0	0	0	0	0	0	0	0	0	0	0	0	0	0	0	0	0	0
G10192.1	14	+	2725	2	novel_not_in_catalog	ENSMUSG00000089901	novel	2721	2	coding	482	1449	593	2041	44168736	44170184	FALSE	TRUE	TRUE	Full	1	1	5.04197	1	T	0	0	0	0	3	0	0	0	0	0	0	0	0	0	0	0	0	0	0	0	0	0	0	0
G10198.1	14	-	4126	2	full-splice_match	ENSMUSG00000071489	ENSMUST00000095959	3187	2	coding	337	1014	184	1197	45096650	45090683	FALSE	TRUE	TRUE	Full	1	1	2.88641	1	T	0	0	0	0	0	0	0	0	0	0	0	0	0	0	0	0	0	0	0	0	0	0	0	0
G102.1	1	-	529	4	novel_not_in_catalog	ENSMUSG00000098234	novel	559	3	non_coding	NA	NA	NA	NA	NA	NA	NA	TRUE	TRUE	Full	1	9	5.47954	0.099071	F	0	0	0	0	0	0	0	0	0	0	0	0	0	0	0	0	0	0	0	0	0	0	0	0
G102.10	1	-	1926	2	incomplete-splice_match	ENSMUSG00000098234	ENSMUST00000182580	473	4	non_coding	NA	NA	NA	NA	NA	NA	NA	TRUE	TRUE	Full	1	9	3.15622	0.057065	F	0	0	0	0	0	0	0	0	0	0	0	0	0	0	0	0	0	0	0	0	0	0	0	0
G102.11	1	-	610	3	full-splice_match	ENSMUSG00000098234	ENSMUST00000182498	559	3	non_coding	NA	NA	NA	NA	NA	NA	NA	TRUE	TRUE	Full	2	9	3.70865	0.0670529	F	0	0	0	0	0	0	0	0	0	0	0	0	0	0	0	0	0	0	0	0	0	0	0	0
G102.12	1	-	1878	2	full-splice_match	ENSMUSG00000098234	ENSMUST00000182043	655	2	non_coding	NA	NA	NA	NA	NA	NA	NA	TRUE	TRUE	Full	6	9	3.99116	0.0721607	F	0	0	0	0	0	0	0	0	0	0	2	0	0	0	3	0	0	0	0	0	0	0	0	0
G102.14	1	-	402	4	full-splice_match	ENSMUSG00000098234	ENSMUST00000182742	400	4	non_coding	NA	NA	NA	NA	NA	NA	NA	TRUE	TRUE	Full	1	9	10.1476	0.183471	F	0	0	0	0	0	6	0	0	0	0	0	0	0	0	0	0	0	0	0	0	0	0	0	0
G102.4	1	-	471	4	full-splice_match	ENSMUSG00000098234	ENSMUST00000182580	473	4	non_coding	NA	NA	NA	NA	NA	NA	NA	TRUE	TRUE	Full	4	9	4.6754	0.084532	F	0	0	0	0	0	0	0	0	0	0	0	0	0	0	0	0	0	0	0	0	0	0	0	0
G102.7	1	-	304	3	novel_in_catalog	ENSMUSG00000098234	novel	473	4	non_coding	NA	NA	NA	NA	NA	NA	NA	TRUE	TRUE	Full	3	9	4.13554	0.0747713	F	0	0	0	0	0	0	0	0	0	0	0	0	0	0	0	0	0	0	0	0	0	0	0	0
G102.8	1	-	406	4	full-splice_match	ENSMUSG00000098234	ENSMUST00000182580	473	4	non_coding	NA	NA	NA	NA	NA	NA	NA	TRUE	TRUE	Full	36	9	12.7194	0.229968	T	11	2	4	14	7	0	4	14	7	3	4	8	5	2	10	17	0	0	0	3	3	0	0	0
G102.9	1	-	1708	3	full-splice_match	ENSMUSG00000098234	ENSMUST00000182819	816	3	non_coding	NA	NA	NA	NA	NA	NA	NA	TRUE	TRUE	Full	21	9	7.29573	0.131908	F	0	8	3	3	9	7	9	14	4	4	0	0	3	3	2	2	0	0	0	4	0	0	0	0
G10200.10	14	-	3463	21	novel_in_catalog	ENSMUSG00000021830	novel	5045	21	coding	819	2460	198	2657	45450902	45373165	FALSE	TRUE	TRUE	Full	2	20	7.31385	0.0642481	F	0	0	0	0	0	0	0	0	0	0	0	0	0	0	0	0	0	0	0	0	0	0	0	0
G10200.12	14	-	3625	22	novel_not_in_catalog	ENSMUSG00000021830	novel	4069	24	coding	852	2559	266	2824	45450902	45373165	FALSE	TRUE	TRUE	Full	1	20	3.61348	0.0317424	F	0	0	0	0	0	0	0	0	0	0	0	2	0	0	0	0	0	0	0	0	0	0	0	0
G10200.13	14	-	3250	20	novel_not_in_catalog	ENSMUSG00000021830	novel	4069	24	coding	750	2253	197	2449	45450902	45373165	FALSE	TRUE	TRUE	Full	1	20	3.06646	0.0269371	F	0	0	0	0	0	0	0	0	0	0	0	0	0	0	0	0	0	0	0	0	0	2	0	0
G10200.14	14	-	3385	21	novel_not_in_catalog	ENSMUSG00000021830	novel	4069	24	coding	792	2379	206	2584	45450902	45373165	FALSE	TRUE	TRUE	Full	1	20	2.75893	0.0242356	F	0	0	0	0	0	0	0	0	0	0	0	0	0	0	0	0	0	0	0	0	0	0	0	0
G10200.15	14	-	3738	22	novel_in_catalog	ENSMUSG00000021830	novel	4069	24	coding	819	2460	478	2937	45450902	45373165	FALSE	TRUE	TRUE	Full	9	20	4.06246	0.0356865	F	2	0	0	0	0	0	0	0	0	0	0	0	0	0	0	0	0	0	0	0	0	0	0	0
G10200.16	14	-	3696	21	novel_in_catalog	ENSMUSG00000021830	novel	5045	21	coding	819	2460	436	2895	45450902	45373165	FALSE	TRUE	TRUE	Full	1	20	3.50876	0.0308225	F	0	0	0	0	0	0	0	2	0	0	0	0	0	0	0	0	0	0	0	0	0	0	0	0
G10200.17	14	-	3587	21	full-splice_match	ENSMUSG00000021830	ENSMUST00000139526	5045	21	coding	819	2460	327	2786	45450902	45373165	FALSE	TRUE	TRUE	Full	41	20	21.4126	0.188098	T	11	14	24	25	30	23	20	8	19	23	32	18	3	17	12	2	9	2	0	2	14	8	8	2
G10200.19	14	-	3633	20	incomplete-splice_match	ENSMUSG00000021830	ENSMUST00000139526	5045	21	coding	819	2460	373	2832	45450902	45373165	FALSE	TRUE	TRUE	Full	6	20	3.22067	0.0282918	F	0	0	0	0	0	0	2	0	2	0	0	0	0	0	0	0	0	0	0	0	0	0	0	0
G10200.2	14	-	4095	21	full-splice_match	ENSMUSG00000021830	ENSMUST00000139526	5045	21	coding	819	2460	376	2835	45450902	45373165	FALSE	TRUE	TRUE	Full	1	20	3.00059	0.0263585	F	0	0	0	2	0	0	0	0	0	0	0	0	0	0	0	0	0	0	0	0	0	0	0	0
G10200.20	14	-	3533	20	novel_in_catalog	ENSMUSG00000021830	novel	4069	24	coding	819	2460	273	2732	45450902	45373165	FALSE	TRUE	TRUE	Full	6	20	7.70527	0.0676865	F	0	0	0	0	0	2	0	0	0	0	0	0	0	0	2	0	0	0	0	0	0	0	0	0
G10200.21	14	-	3694	21	novel_not_in_catalog	ENSMUSG00000021830	novel	4069	24	coding	589	1770	1124	2893	45406760	45373165	FALSE	TRUE	TRUE	Full	1	20	3.62379	0.0318329	F	0	0	0	0	0	0	0	0	0	0	0	0	0	0	0	0	0	0	0	0	0	0	0	0
G10200.22	14	-	3524	21	novel_not_in_catalog	ENSMUSG00000021830	novel	5045	21	coding	723	2172	333	2504	45450902	45373385	FALSE	TRUE	TRUE	Full	1	20	3.38255	0.0297138	F	0	0	0	0	0	2	0	0	0	0	0	0	0	0	0	0	0	0	0	0	0	0	0	0
G10200.26	14	-	3512	5	novel_not_in_catalog	ENSMUSG00000021830	novel	2977	5	non_coding	NA	NA	NA	NA	NA	NA	NA	TRUE	TRUE	Full	1	20	2.97518	0.0261353	F	0	0	0	0	0	0	0	0	0	0	0	0	0	0	0	0	0	0	0	0	0	0	0	0
G10200.27	14	-	3763	4	full-splice_match	ENSMUSG00000021830	ENSMUST00000153383	3691	4	non_coding	NA	NA	NA	NA	NA	NA	NA	TRUE	TRUE	Full	24	20	7.00812	0.0615625	F	4	2	0	2	0	8	2	0	8	4	0	7	2	0	0	0	0	5	0	0	2	2	0	0
G10200.28	14	-	3580	4	full-splice_match	ENSMUSG00000021830	ENSMUST00000153383	3691	4	non_coding	NA	NA	NA	NA	NA	NA	NA	TRUE	TRUE	Full	2	20	3.1705	0.0278511	F	0	0	0	0	0	2	0	0	0	0	0	0	0	0	0	0	0	0	0	0	0	0	0	0
G10200.3	14	-	3944	21	novel_in_catalog	ENSMUSG00000021830	novel	4069	24	coding	589	1770	1106	2875	45406760	45373165	FALSE	TRUE	TRUE	Full	1	20	3.092	0.0271615	F	0	0	0	0	0	0	0	0	0	0	0	0	0	0	0	0	0	0	0	0	0	0	0	0
G10200.4	14	-	3758	21	novel_not_in_catalog	ENSMUSG00000021830	novel	5045	21	coding	803	2412	280	2691	45450854	45373165	FALSE	TRUE	TRUE	Full	1	20	3.36102	0.0295247	F	0	0	0	0	0	0	0	0	0	0	0	0	0	0	0	0	0	0	0	0	0	0	0	0
G10200.6	14	-	3998	22	novel_in_catalog	ENSMUSG00000021830	novel	4069	24	coding	819	2460	475	2934	45450902	45373165	FALSE	TRUE	TRUE	Full	1	20	3.36102	0.0295247	F	0	0	0	0	0	0	0	0	0	0	0	0	0	0	0	0	0	0	0	0	0	0	0	0
G10200.7	14	-	3846	21	full-splice_match	ENSMUSG00000021830	ENSMUST00000139526	5045	21	coding	819	2460	328	2787	45450902	45373165	FALSE	TRUE	TRUE	Full	25	20	17.1724	0.15085	F	0	4	2	5	9	3	7	0	8	7	13	10	6	0	3	0	0	2	0	0	0	0	2	0
G10200.8	14	-	3755	21	novel_in_catalog	ENSMUSG00000021830	novel	5045	21	coding	819	2460	237	2696	45450902	45373165	FALSE	TRUE	TRUE	Full	2	20	7.02796	0.0617367	F	0	0	0	0	0	0	0	0	0	0	0	0	0	0	0	0	0	0	0	0	0	0	0	0
G10203.2	14	+	3932	8	novel_not_in_catalog	ENSMUSG00000049092	novel	3917	7	coding	118	357	430	786	45483812	45514915	TRUE	TRUE	TRUE	Full	1	4	3.00059	0.188165	F	0	0	0	2	0	0	0	0	0	0	0	0	0	0	0	0	0	0	0	0	0	0	0	0
G10203.3	14	+	3818	7	full-splice_match	ENSMUSG00000049092	ENSMUST00000146150	3917	7	coding	244	735	430	1164	45483812	45517537	FALSE	TRUE	TRUE	Full	16	4	5.83901	0.366161	T	0	2	3	4	7	5	2	2	0	0	0	0	0	0	2	0	0	0	0	0	0	0	0	0
G10203.4	14	+	963	2	full-splice_match	ENSMUSG00000049092	ENSMUST00000147957	1395	2	coding	31	96	269	364	45460685	45460780	FALSE	TRUE	TRUE	Full	1	4	3.4856	0.21858	F	0	0	0	0	0	0	0	0	0	2	0	0	0	0	0	0	0	0	0	0	0	0	0	0
G10203.5	14	+	4461	6	incomplete-splice_match	ENSMUSG00000049092	ENSMUST00000146150	3917	7	coding	186	561	227	787	45483812	45516511	FALSE	TRUE	TRUE	Full	1	4	3.62138	0.227095	F	0	0	0	0	0	0	0	0	0	0	0	0	0	0	0	0	0	0	0	0	0	0	0	0
G10207.1	14	-	4413	16	full-splice_match	ENSMUSG00000021831	ENSMUST00000022378	4418	16	coding	464	1395	83	1477	45555947	45523485	FALSE	TRUE	TRUE	Full	38	8	7.71826	0.147431	F	3	3	12	9	9	14	2	0	6	9	5	7	2	3	0	2	2	3	0	0	2	0	3	0
G10207.10	14	-	1618	16	full-splice_match	ENSMUSG00000021831	ENSMUST00000022378	4418	16	coding	464	1395	106	1500	45555947	45523485	FALSE	TRUE	TRUE	Full	3	8	3.08289	0.0588882	F	0	0	0	0	0	2	0	0	0	0	0	0	0	0	0	0	0	0	0	0	0	0	0	0
G10207.11	14	-	2082	13	incomplete-splice_match	ENSMUSG00000021831	ENSMUST00000022378	4418	16	coding	378	1137	52	1188	45555947	45529795	FALSE	TRUE	TRUE	Full	1	8	3.1072	0.0593525	F	0	0	0	0	0	0	0	0	0	0	0	0	0	0	0	0	0	0	0	0	0	0	0	0
G10207.4	14	-	4290	16	full-splice_match	ENSMUSG00000021831	ENSMUST00000022378	4418	16	coding	464	1395	52	1446	45555947	45523485	FALSE	TRUE	TRUE	Full	42	8	11.4585	0.218877	F	4	6	13	23	15	15	6	3	14	7	8	12	4	12	7	2	2	4	0	3	2	0	0	0
G10207.6	14	-	3186	16	full-splice_match	ENSMUSG00000021831	ENSMUST00000022378	4418	16	coding	464	1395	83	1477	45555947	45523485	FALSE	TRUE	TRUE	Full	24	8	6.11623	0.11683	F	3	3	7	2	3	2	3	2	2	0	0	2	0	2	3	0	4	0	0	0	0	0	0	0
G10207.7	14	-	2284	16	full-splice_match	ENSMUSG00000021831	ENSMUST00000022378	4418	16	coding	464	1395	83	1477	45555947	45523485	FALSE	TRUE	FALSE	Full	3	8	5.10345	0.0974842	F	0	0	0	0	0	0	0	0	0	0	0	0	0	0	0	0	0	0	0	0	0	0	0	0
G10207.8	14	-	1689	16	full-splice_match	ENSMUSG00000021831	ENSMUST00000022378	4418	16	coding	464	1395	83	1477	45555947	45523485	FALSE	TRUE	TRUE	Full	5	8	3.6006	0.0687774	F	0	0	0	0	0	0	0	0	0	0	0	0	0	0	0	0	0	0	0	0	0	0	0	0
G10207.9	14	-	1629	16	full-splice_match	ENSMUSG00000021831	ENSMUST00000022378	4418	16	coding	464	1395	78	1472	45555947	45523485	FALSE	TRUE	TRUE	Full	46	8	12.1644	0.23236	T	0	6	7	3	7	5	8	11	4	11	2	8	8	9	7	6	2	3	10	5	5	4	3	0
G10208.12	14	+	2177	14	full-splice_match	ENSMUSG00000021832	ENSMUST00000022380	2234	14	coding	389	1170	21	1190	45567305	45586158	FALSE	TRUE	TRUE	Full	48	13	48.0699	0.249924	F	16	20	18	28	40	28	37	22	18	30	18	11	10	18	30	20	26	26	42	40	30	20	25	18
G10208.13	14	+	1733	14	novel_in_catalog	ENSMUSG00000021832	novel	2234	14	coding	268	807	555	1361	45572411	45586158	FALSE	TRUE	TRUE	Full	14	13	4.38377	0.0227919	F	0	0	0	0	0	0	4	0	0	0	0	0	0	2	0	0	3	0	5	0	5	2	2	2
G10208.14	14	+	2348	14	novel_in_catalog	ENSMUSG00000021832	novel	2234	14	coding	268	807	555	1361	45572411	45586158	FALSE	TRUE	TRUE	Full	10	13	3.85312	0.020033	F	0	0	2	0	3	0	0	2	0	0	0	0	0	0	2	0	0	0	0	0	2	0	4	2
G10208.15	14	+	1636	13	novel_in_catalog	ENSMUSG00000021832	novel	2234	14	coding	268	807	459	1265	45572411	45586158	FALSE	TRUE	TRUE	Full	1	13	3.67691	0.0191169	F	0	0	0	0	0	0	2	0	0	0	0	0	0	0	0	0	0	0	0	0	0	0	0	0
G10208.16	14	+	1473	14	novel_in_catalog	ENSMUSG00000021832	novel	2234	14	coding	268	807	543	1349	45572411	45586158	FALSE	TRUE	TRUE	Full	15	13	3.93146	0.0204403	F	0	0	2	0	0	0	0	0	0	2	0	0	0	0	0	0	0	3	5	2	0	4	0	0
G10208.2	14	+	2489	13	novel_in_catalog	ENSMUSG00000021832	novel	2234	14	coding	375	1128	990	2117	45568244	45586158	FALSE	TRUE	TRUE	Full	1	13	4.6965	0.0244179	F	0	0	0	0	0	0	0	0	0	0	0	0	2	0	0	0	0	0	0	0	0	0	0	0
G10208.3	14	+	2022	14	full-splice_match	ENSMUSG00000021832	ENSMUST00000022380	2234	14	coding	403	1212	4	1215	45567263	45586158	FALSE	TRUE	TRUE	Full	4	13	3.47735	0.0180793	F	0	0	0	0	0	0	2	0	0	0	0	0	0	0	0	0	0	0	0	0	0	0	0	0
G10208.4	14	+	2236	13	novel_in_catalog	ENSMUSG00000021832	novel	2234	14	coding	375	1128	985	2112	45568244	45586158	FALSE	TRUE	TRUE	Full	2	13	4.40372	0.0228957	F	0	0	0	0	0	0	2	0	0	0	0	0	0	0	0	0	3	0	0	0	0	0	0	0
G10208.5	14	+	2560	12	novel_in_catalog	ENSMUSG00000021832	novel	2234	14	coding	268	807	1383	2189	45572411	45586158	FALSE	TRUE	TRUE	Full	1	13	4.37641	0.0227537	F	0	0	0	0	0	0	0	0	0	0	0	0	0	0	0	0	0	0	0	0	0	0	0	0
G10208.6	14	+	1717	15	novel_in_catalog	ENSMUSG00000021832	novel	2234	14	coding	368	1107	240	1346	45567957	45586158	FALSE	TRUE	TRUE	Full	1	13	3.1627	0.0164434	F	0	0	2	0	0	0	0	0	0	0	0	0	0	0	0	0	0	0	0	0	0	0	0	0
G10208.7	14	+	1253	14	full-splice_match	ENSMUSG00000021832	ENSMUST00000022380	2234	14	coding	389	1170	21	1190	45567305	45586158	FALSE	TRUE	TRUE	Full	22	13	4.70365	0.0244551	F	0	0	0	2	0	0	2	0	0	0	0	0	0	0	0	3	5	2	6	2	0	4	0	0
G10208.8	14	+	1309	14	full-splice_match	ENSMUSG00000021832	ENSMUST00000022380	2234	14	coding	389	1170	21	1190	45567305	45586158	FALSE	TRUE	TRUE	Full	48	13	44.3351	0.230506	F	17	21	22	16	26	21	28	25	11	18	13	10	19	25	19	30	36	33	64	35	42	48	27	27
G10208.9	14	+	1560	14	full-splice_match	ENSMUSG00000021832	ENSMUST00000022380	2234	14	coding	389	1170	21	1190	45567305	45586158	FALSE	TRUE	TRUE	Full	48	13	59.2678	0.308143	T	22	17	26	25	39	36	38	35	13	24	16	20	16	33	37	45	53	56	73	42	51	50	33	23
G10209.10	14	+	3463	2	full-splice_match	ENSMUSG00000053205	ENSMUST00000228321	1267	2	non_coding	NA	NA	NA	NA	NA	NA	NA	TRUE	TRUE	Full	6	3	3.39484	0.265099	F	0	0	0	0	0	0	0	0	2	2	0	0	0	0	0	0	0	0	0	0	0	0	0	0
G10209.11	14	+	3657	2	full-splice_match	ENSMUSG00000053205	ENSMUST00000228321	1267	2	non_coding	NA	NA	NA	NA	NA	NA	NA	FALSE	TRUE	Full	1	3	4.6965	0.366744	F	0	0	0	0	0	0	0	0	0	0	0	0	2	0	0	0	0	0	0	0	0	0	0	0
G10209.8	14	+	3517	3	incomplete-splice_match	ENSMUSG00000053205	ENSMUST00000227538	385	4	non_coding	NA	NA	NA	NA	NA	NA	NA	TRUE	TRUE	Full	1	3	4.71458	0.368156	T	0	0	0	0	0	0	0	0	0	0	0	0	0	0	0	0	0	0	0	0	0	0	0	0
G10210.1	14	-	2620	6	full-splice_match	ENSMUSG00000037722	ENSMUST00000046191	2788	6	coding	184	555	61	615	45622191	45615796	FALSE	TRUE	TRUE	Full	12	8	4.90324	0.105765	F	0	0	0	0	2	6	2	0	0	0	0	2	0	0	0	0	0	0	0	0	0	0	0	0
G10210.10	14	-	795	6	full-splice_match	ENSMUSG00000037722	ENSMUST00000046191	2788	6	coding	184	555	61	615	45622191	45615796	FALSE	TRUE	TRUE	Full	17	8	4.1284	0.0890513	F	2	0	2	2	2	0	0	0	2	2	0	0	0	0	0	4	3	0	2	0	0	0	2	0
G10210.11	14	-	1074	6	novel_in_catalog	ENSMUSG00000037722	novel	710	7	coding	184	555	347	901	45622191	45615796	FALSE	TRUE	TRUE	Full	1	8	7.30606	0.157595	F	0	0	0	0	0	0	0	0	0	0	0	0	0	0	0	0	0	0	0	0	0	0	0	0
G10210.5	14	-	1899	6	full-splice_match	ENSMUSG00000037722	ENSMUST00000046191	2788	6	coding	184	555	61	615	45622191	45615796	FALSE	TRUE	TRUE	Full	23	8	5.22703	0.112749	F	0	4	2	3	3	0	3	2	2	0	0	4	2	3	0	6	0	2	2	2	0	0	0	0
G10210.6	14	-	1848	6	full-splice_match	ENSMUSG00000037722	ENSMUST00000046191	2788	6	coding	184	555	61	615	45622191	45615796	FALSE	TRUE	TRUE	Full	11	8	4.52839	0.0976792	F	0	0	2	0	3	2	0	0	0	3	2	0	0	0	0	2	0	0	4	0	0	0	0	0
G10210.7	14	-	1883	6	novel_not_in_catalog	ENSMUSG00000037722	novel	710	7	coding	184	555	442	996	45622191	45615796	FALSE	TRUE	TRUE	Full	2	8	4.15499	0.0896249	F	0	0	0	0	0	0	0	0	0	0	0	2	2	0	0	0	0	0	0	0	0	0	0	0
G10210.8	14	-	1502	6	full-splice_match	ENSMUSG00000037722	ENSMUST00000046191	2788	6	coding	184	555	61	615	45622191	45615796	FALSE	TRUE	TRUE	Full	46	8	12.5673	0.271083	T	3	4	6	5	8	9	6	9	8	8	8	10	4	13	7	17	3	3	14	2	5	4	0	2
G10210.9	14	-	1759	6	novel_in_catalog	ENSMUSG00000037722	novel	2788	6	coding	184	555	322	876	45622191	45615796	FALSE	TRUE	TRUE	Full	7	8	3.54435	0.0764532	F	0	0	2	0	0	0	0	0	0	0	2	0	0	2	0	0	0	0	0	0	0	0	0	0
G10211.12	14	-	3203	16	novel_in_catalog	ENSMUSG00000037712	novel	3293	15	coding	691	2076	75	2150	45767038	45697307	FALSE	TRUE	TRUE	Full	43	17	9.42857	0.121851	F	4	3	12	11	12	6	6	4	10	8	13	8	3	9	6	2	0	2	0	3	7	4	0	0
G10211.13	14	-	3365	15	novel_in_catalog	ENSMUSG00000037712	novel	3293	15	coding	691	2076	237	2312	45767038	45697307	FALSE	TRUE	TRUE	Full	12	17	3.56651	0.046092	F	3	0	0	0	0	2	0	0	2	0	0	0	0	0	0	0	0	0	2	0	0	0	0	0
G10211.14	14	-	2838	12	novel_in_catalog	ENSMUSG00000037712	novel	3293	15	coding	492	1479	307	1785	45713532	45697307	FALSE	TRUE	TRUE	Full	1	17	3.38255	0.0437146	F	0	0	0	0	0	2	0	0	0	0	0	0	0	0	0	0	0	0	0	0	0	0	0	0
G10211.17	14	-	3170	15	full-splice_match	ENSMUSG00000037712	ENSMUST00000045905	3293	15	coding	680	2043	75	2117	45767038	45697307	FALSE	TRUE	TRUE	Full	48	17	14.5275	0.187747	T	6	6	23	22	26	19	4	8	20	14	20	14	8	19	11	3	3	4	2	5	3	4	4	3
G10211.18	14	-	3124	14	incomplete-splice_match	ENSMUSG00000037712	ENSMUST00000045905	3293	15	coding	680	2043	29	2071	45767038	45697307	FALSE	TRUE	TRUE	Full	21	17	4.9279	0.0636861	F	3	2	2	7	2	2	0	0	5	0	0	2	5	0	2	2	0	0	0	0	0	0	0	0
G10211.19	14	-	3186	15	novel_not_in_catalog	ENSMUSG00000037712	novel	3293	15	coding	680	2043	94	2136	45767038	45697307	FALSE	TRUE	TRUE	Full	1	17	3.50876	0.0453457	F	0	0	0	0	0	0	0	2	0	0	0	0	0	0	0	0	0	0	0	0	0	0	0	0
G10211.2	14	-	1353	2	incomplete-splice_match	ENSMUSG00000037712	ENSMUST00000045905	3293	15	coding	85	258	43	300	45699307	45697307	FALSE	TRUE	TRUE	Full	1	17	3.50876	0.0453457	F	0	0	0	0	0	0	0	2	0	0	0	0	0	0	0	0	0	0	0	0	0	0	0	0
G10211.20	14	-	2770	15	full-splice_match	ENSMUSG00000037712	ENSMUST00000045905	3293	15	coding	680	2043	75	2117	45767038	45697307	FALSE	TRUE	TRUE	Full	1	17	3.38255	0.0437146	F	0	0	0	0	0	2	0	0	0	0	0	0	0	0	0	0	0	0	0	0	0	0	0	0
G10211.21	14	-	2405	16	novel_not_in_catalog	ENSMUSG00000037712	novel	3293	15	coding	698	2097	212	2308	45767038	45697307	FALSE	TRUE	TRUE	Full	1	17	3.09713	0.0400259	F	0	2	0	0	0	0	0	0	0	0	0	0	0	0	0	0	0	0	0	0	0	0	0	0
G10211.22	14	-	1998	14	novel_in_catalog	ENSMUSG00000037712	novel	3293	15	coding	586	1761	141	1901	45742029	45697307	FALSE	TRUE	TRUE	Full	3	17	3.4252	0.0442658	F	0	0	0	2	0	0	0	0	0	0	0	0	0	0	0	0	0	0	0	0	2	0	0	0
G10211.23	14	-	2247	16	novel_in_catalog	ENSMUSG00000037712	novel	3293	15	coding	691	2076	75	2150	45767038	45697307	FALSE	TRUE	TRUE	Full	1	17	2.97518	0.03845	F	0	0	0	0	0	0	0	0	0	0	0	0	0	0	0	0	0	0	0	0	0	0	0	0
G10211.24	14	-	2420	15	novel_in_catalog	ENSMUSG00000037712	novel	3293	15	coding	691	2076	248	2323	45767038	45697307	FALSE	TRUE	TRUE	Full	1	17	3.33721	0.0431287	F	0	0	0	0	0	0	0	0	0	0	0	0	0	0	0	0	0	0	0	0	0	0	2	0
G10211.26	14	-	2269	15	full-splice_match	ENSMUSG00000037712	ENSMUST00000045905	3293	15	coding	680	2043	130	2172	45767038	45697307	FALSE	TRUE	TRUE	Full	8	17	3.54081	0.0457599	F	0	0	0	0	0	0	2	0	0	0	0	0	0	3	0	0	0	0	0	0	0	0	0	0
G10211.27	14	-	2233	15	novel_not_in_catalog	ENSMUSG00000037712	novel	3293	15	coding	680	2043	94	2136	45767038	45697307	FALSE	TRUE	TRUE	Full	1	17	3.36131	0.0434401	F	0	0	0	0	2	0	0	0	0	0	0	0	0	0	0	0	0	0	0	0	0	0	0	0
G10211.28	14	-	2115	4	incomplete-splice_match	ENSMUSG00000037712	ENSMUST00000150660	816	6	coding	178	537	75	611	45767038	45719878	FALSE	TRUE	FALSE	Full	1	17	3.59279	0.0464316	F	0	0	0	0	0	0	0	0	0	0	2	0	0	0	0	0	0	0	0	0	0	0	0	0
G10211.4	14	-	3293	17	novel_not_in_catalog	ENSMUSG00000037712	novel	3293	15	coding	698	2097	144	2240	45767038	45697307	FALSE	TRUE	TRUE	Full	4	17	4.25626	0.0550061	F	0	3	0	0	0	0	0	0	0	0	0	3	0	0	0	0	0	0	0	0	0	0	0	0
G10211.6	14	-	3191	16	novel_not_in_catalog	ENSMUSG00000037712	novel	3293	15	coding	687	2064	75	2138	45767038	45697307	FALSE	TRUE	TRUE	Full	4	17	3.55904	0.0459955	F	0	0	2	0	2	2	0	0	0	0	0	0	0	0	0	0	0	0	0	0	0	0	0	0
G10216.1	14	+	1077	2	novel_in_catalog	ENSMUSG00000085913	novel	679	3	non_coding	NA	NA	NA	NA	NA	NA	NA	TRUE	TRUE	Full	1	1	4.4542	1	T	0	0	0	0	0	0	0	0	0	0	0	0	0	0	0	0	0	0	0	0	0	0	0	0
G10221.2	14	-	1134	2	incomplete-splice_match	ENSMUSG00000037697	ENSMUST00000152110	4040	10	coding	113	342	31	372	45839181	45832940	FALSE	TRUE	TRUE	Full	1	1	3.38255	1	T	0	0	0	0	0	2	0	0	0	0	0	0	0	0	0	0	0	0	0	0	0	0	0	0
G10222.1	14	-	1057	4	novel_not_in_catalog	ENSMUSG00000086124	novel	1524	2	non_coding	NA	NA	NA	NA	NA	NA	NA	TRUE	TRUE	Full	1	2	2.88641	0.439066	F	0	0	0	0	0	0	0	0	0	0	0	0	0	0	0	0	0	0	0	0	0	0	0	0
G10222.2	14	-	955	3	novel_not_in_catalog	ENSMUSG00000086124	novel	1524	2	non_coding	NA	NA	NA	NA	NA	NA	NA	TRUE	TRUE	Full	5	2	3.68757	0.560934	T	0	0	0	0	0	0	0	0	0	0	0	0	0	0	0	0	0	0	0	0	0	0	0	0
G10224.1	14	-	1751	4	novel_not_in_catalog	ENSMUSG00000021835	novel	2064	4	coding	408	1227	189	1415	46623544	46621316	FALSE	TRUE	TRUE	Full	1	3	2.97518	0.295999	F	0	0	0	0	0	0	0	0	0	0	0	0	0	0	0	0	0	0	0	0	0	0	0	0
G10224.3	14	-	1986	4	full-splice_match	ENSMUSG00000021835	ENSMUST00000074077	2064	4	coding	408	1227	430	1656	46623544	46621316	FALSE	TRUE	TRUE	Full	3	3	3.28175	0.3265	F	0	0	0	0	2	0	0	2	0	0	0	0	0	0	0	0	0	0	0	0	0	0	0	0
G10224.4	14	-	1713	3	incomplete-splice_match	ENSMUSG00000021835	ENSMUST00000074077	2064	4	coding	408	1227	157	1383	46623544	46621316	FALSE	TRUE	TRUE	Full	9	3	3.79438	0.377501	T	0	0	0	3	0	0	0	2	0	0	0	0	0	2	0	0	0	3	2	0	0	2	2	0
G10226.1	14	+	913	8	novel_in_catalog	ENSMUSG00000037628	novel	917	8	coding	212	639	243	881	46998097	47008944	FALSE	TRUE	TRUE	Full	1	1	3.36131	1	T	0	0	0	0	2	0	0	0	0	0	0	0	0	0	0	0	0	0	0	0	0	0	0	0
G10227.1	14	-	1375	4	novel_in_catalog	ENSMUSG00000015759	novel	1538	5	coding	96	291	133	423	47025720	47013979	FALSE	TRUE	TRUE	Full	1	23	3.14305	0.00448248	F	0	0	0	0	0	0	0	0	0	0	0	0	0	0	0	0	0	0	0	0	0	0	0	0
G10227.11	14	-	1617	5	novel_in_catalog	ENSMUSG00000015759	novel	789	6	non_coding	NA	NA	NA	NA	NA	NA	NA	TRUE	TRUE	Full	7	23	3.53092	0.00503564	F	0	2	0	0	0	0	0	0	0	0	0	0	0	0	0	0	0	0	0	0	0	0	0	0
G10227.12	14	-	1204	4	incomplete-splice_match	ENSMUSG00000015759	ENSMUST00000015903	1538	5	coding	80	243	112	354	47017640	47013979	FALSE	TRUE	TRUE	Full	1	23	2.91761	0.00416096	F	0	0	0	0	0	0	0	0	0	0	0	0	0	0	0	0	0	0	0	0	0	0	0	0
G10227.13	14	-	1235	5	novel_in_catalog	ENSMUSG00000015759	novel	789	6	coding	112	339	47	385	47025720	47013979	FALSE	TRUE	TRUE	Full	1	23	3.76427	0.00536842	F	0	0	0	0	0	0	0	0	0	0	0	0	0	0	0	0	0	0	0	0	0	0	0	0
G10227.14	14	-	1187	4	novel_in_catalog	ENSMUSG00000015759	novel	1538	5	coding	96	291	47	337	47025720	47013979	FALSE	TRUE	TRUE	Full	8	23	5.6365	0.00803851	F	0	0	0	0	0	0	0	0	0	0	0	0	0	0	0	0	0	0	0	0	0	0	0	0
G10227.15	14	-	3669	4	novel_in_catalog	ENSMUSG00000015759	novel	1538	5	coding	136	411	47	457	47025720	47016342	FALSE	TRUE	TRUE	Full	1	23	3.49114	0.0049789	F	0	0	0	0	0	0	0	0	0	0	0	0	0	0	0	0	0	0	0	0	0	0	0	0
G10227.17	14	-	1377	6	full-splice_match	ENSMUSG00000015759	ENSMUST00000146629	789	6	coding	160	483	47	529	47025720	47013979	FALSE	TRUE	TRUE	Full	48	23	101.894	0.145317	F	30	55	39	41	68	42	36	74	44	48	30	64	50	73	51	78	61	57	92	61	54	70	53	28
G10227.18	14	-	1724	11	fusion	ENSMUSG00000062014_ENSMUSG00000015759	novel	610	7	coding	252	759	118	876	47059560	47013979	FALSE	TRUE	TRUE	Full	1	23	3.1072	0.00443134	F	0	0	0	0	0	0	0	0	0	0	0	0	0	0	0	0	0	0	0	0	0	0	0	0
G10227.19	14	-	1326	5	full-splice_match	ENSMUSG00000015759	ENSMUST00000015903	1538	5	coding	144	435	47	481	47025720	47013979	FALSE	TRUE	TRUE	Full	48	23	425.529	0.60687	T	168	216	224	189	262	188	216	337	187	252	205	202	198	314	250	356	240	259	356	283	242	272	163	179
G10227.2	14	-	1477	6	full-splice_match	ENSMUSG00000015759	ENSMUST00000146629	789	6	coding	160	483	47	529	47025720	47013979	FALSE	TRUE	TRUE	Full	47	23	14.6879	0.0209473	F	3	9	3	6	11	4	3	12	8	11	4	5	9	13	5	14	6	16	19	12	8	15	15	7
G10227.20	14	-	1215	4	fusion	ENSMUSG00000062014_ENSMUSG00000015759	novel	1538	5	non_coding	NA	NA	NA	NA	NA	NA	NA	TRUE	TRUE	Full	1	23	3.46801	0.00494591	F	0	0	0	0	0	0	0	0	0	0	0	0	0	0	0	0	0	0	0	0	0	0	0	0
G10227.21	14	-	1262	5	full-splice_match	ENSMUSG00000015759	ENSMUST00000015903	1538	5	coding	144	435	47	481	47025720	47013979	FALSE	TRUE	FALSE	Full	4	23	4.5207	0.00644722	F	0	0	0	0	0	0	0	0	0	0	2	0	0	0	0	0	0	0	0	0	0	0	0	0
G10227.22	14	-	738	5	full-splice_match	ENSMUSG00000015759	ENSMUST00000015903	1538	5	coding	144	435	47	481	47025720	47013979	FALSE	TRUE	TRUE	Full	3	23	3.7187	0.00530344	F	0	0	0	0	0	0	0	2	0	0	0	0	0	0	0	0	0	0	0	3	0	0	0	0
G10227.26	14	-	4272	8	novel_in_catalog	ENSMUSG00000062014	novel	4171	7	coding	109	330	342	671	47054843	47049209	FALSE	TRUE	TRUE	Full	2	23	4.0633	0.00579489	F	0	0	3	0	0	2	0	0	0	0	0	0	0	0	0	0	0	0	0	0	0	0	0	0
G10227.31	14	-	4108	7	full-splice_match	ENSMUSG00000062014	ENSMUST00000111817	4171	7	coding	142	429	83	511	47059560	47049209	FALSE	TRUE	TRUE	Full	48	23	29.0563	0.0414388	F	21	18	33	31	36	60	9	6	30	18	39	22	11	18	8	6	5	7	6	6	8	9	8	7
G10227.34	14	-	3880	3	full-splice_match	ENSMUSG00000062014	ENSMUST00000228065	280	3	non_coding	NA	NA	NA	NA	NA	NA	NA	TRUE	TRUE	Full	4	23	5.00907	0.0071437	F	0	0	3	0	0	4	0	0	0	2	0	0	0	0	0	0	0	0	0	0	0	0	0	0
G10227.35	14	-	3999	5	novel_in_catalog	ENSMUSG00000062014	novel	4171	7	non_coding	NA	NA	NA	NA	NA	NA	NA	TRUE	TRUE	Full	1	23	3.1072	0.00443134	F	0	0	0	0	0	0	0	0	0	0	0	0	0	0	0	0	0	0	0	0	0	0	0	0
G10227.36	14	-	3267	7	full-splice_match	ENSMUSG00000062014	ENSMUST00000111817	4171	7	coding	142	429	118	546	47059560	47049209	FALSE	TRUE	TRUE	Full	32	23	7.99685	0.0114047	F	2	5	6	5	4	3	4	2	3	3	0	2	3	0	4	0	0	4	0	0	0	0	2	0
G10227.37	14	-	3120	5	novel_in_catalog	ENSMUSG00000062014	novel	761	6	coding	93	282	118	399	47059560	47049209	FALSE	TRUE	TRUE	Full	1	23	5.23671	0.00746835	F	0	0	0	0	0	0	0	0	0	0	0	0	0	0	0	0	0	0	0	0	0	0	0	0
G10227.4	14	-	1427	5	full-splice_match	ENSMUSG00000015759	ENSMUST00000015903	1538	5	coding	144	435	47	481	47025720	47013979	FALSE	TRUE	TRUE	Full	48	23	55.8947	0.0797144	F	25	18	35	32	38	29	45	39	33	39	21	32	32	57	31	47	40	36	47	59	40	45	41	17
G10227.5	14	-	1592	6	novel_not_in_catalog	ENSMUSG00000015759	novel	789	6	non_coding	NA	NA	NA	NA	NA	NA	NA	TRUE	TRUE	Full	2	23	3.70545	0.00528454	F	0	0	0	0	0	0	0	0	0	0	0	0	0	0	0	0	0	0	0	0	0	0	0	0
G10227.7	14	-	1285	5	novel_not_in_catalog	ENSMUSG00000015759	novel	1538	5	non_coding	NA	NA	NA	NA	NA	NA	NA	TRUE	TRUE	Full	10	23	4.05758	0.00578674	F	0	0	0	0	2	0	0	0	0	0	2	0	0	0	0	2	0	0	3	0	0	0	0	0
G10227.8	14	-	1333	5	novel_not_in_catalog	ENSMUSG00000015759	novel	1538	5	non_coding	NA	NA	NA	NA	NA	NA	NA	TRUE	TRUE	Full	8	23	3.65016	0.00520569	F	0	0	0	2	0	0	0	2	0	0	0	0	2	0	0	0	0	0	0	2	0	0	0	0
G10230.1	14	+	1339	6	full-splice_match	ENSMUSG00000055128	ENSMUST00000068532	1324	6	coding	332	999	170	1168	47069733	47091476	FALSE	TRUE	TRUE	Full	48	11	60.0621	0.612108	T	20	22	27	21	38	29	41	28	19	28	12	17	20	43	39	33	30	44	79	54	34	39	23	39
G10230.11	14	+	1367	5	novel_in_catalog	ENSMUSG00000055128	novel	1324	6	coding	140	423	767	1189	47090842	47091476	FALSE	TRUE	TRUE	Full	3	11	3.46945	0.035358	F	0	0	0	0	0	0	0	0	0	0	0	0	0	0	0	0	0	0	2	0	0	0	0	0
G10230.14	14	+	1571	7	novel_in_catalog	ENSMUSG00000055128	novel	1468	7	coding	249	750	651	1400	47083336	47091476	FALSE	TRUE	TRUE	Full	1	11	3.62379	0.0369309	F	0	0	0	0	0	0	0	0	0	0	0	0	0	0	0	0	0	0	0	0	0	0	0	0
G10230.2	14	+	1112	3	full-splice_match	ENSMUSG00000055128	ENSMUST00000133790	2462	3	coding	186	561	152	712	47069733	47083647	FALSE	TRUE	TRUE	Full	2	11	3.8958	0.0397031	F	0	0	0	0	0	0	0	0	0	0	0	0	0	0	0	0	0	0	0	0	0	0	0	0
G10230.3	14	+	2443	4	full-splice_match	ENSMUSG00000055128	ENSMUST00000133989	873	4	coding	212	639	146	784	47069733	47083858	FALSE	TRUE	TRUE	Full	1	11	4.32961	0.0441241	F	0	0	0	0	0	0	0	0	0	0	0	0	0	0	0	0	0	0	0	0	0	0	0	0
G10230.4	14	+	502	2	full-splice_match	ENSMUSG00000055128	ENSMUST00000140114	419	2	coding	112	339	143	481	47069733	47077848	FALSE	TRUE	TRUE	Full	7	11	4.9489	0.0504354	F	0	0	0	0	0	0	0	0	0	0	0	0	0	0	0	0	0	0	4	0	2	0	0	0
G10230.5	14	+	1152	5	novel_in_catalog	ENSMUSG00000055128	novel	1324	6	coding	296	891	84	974	47069733	47091476	FALSE	TRUE	TRUE	Full	1	11	3.20782	0.0326916	F	0	0	0	0	0	0	0	0	0	0	0	0	0	0	2	0	0	0	0	0	0	0	0	0
G10230.6	14	+	1812	5	novel_not_in_catalog	ENSMUSG00000055128	novel	1324	6	coding	228	687	61	747	47069733	47113851	FALSE	TRUE	TRUE	Full	1	11	3.14531	0.0320546	F	0	0	0	0	0	0	0	0	0	0	0	0	0	0	0	0	0	0	0	0	0	0	0	0
G10230.7	14	+	1407	7	novel_not_in_catalog	ENSMUSG00000055128	novel	1468	7	coding	194	585	58	642	47069733	47085614	TRUE	TRUE	TRUE	Full	4	11	4.04466	0.0412202	F	0	0	0	0	0	0	0	0	0	0	0	2	0	3	0	0	0	0	0	0	0	0	0	0
G10230.8	14	+	1304	7	novel_not_in_catalog	ENSMUSG00000055128	novel	1468	7	coding	211	636	58	693	47069733	47086128	TRUE	TRUE	TRUE	Full	12	11	4.12775	0.0420669	F	0	0	0	0	0	0	0	0	0	0	0	2	0	3	0	3	0	2	3	0	0	2	0	3
G10230.9	14	+	1867	6	full-splice_match	ENSMUSG00000055128	ENSMUST00000068532	1324	6	coding	332	999	58	1056	47069733	47091476	FALSE	TRUE	TRUE	Full	7	11	3.26824	0.0333075	F	0	2	0	0	0	0	0	0	0	0	0	0	0	0	2	0	0	2	0	0	0	0	0	0
G10234.1	14	-	2837	6	full-splice_match	ENSMUSG00000037580	ENSMUST00000089959	2775	6	coding	241	726	209	934	47426724	47393255	FALSE	TRUE	TRUE	Full	2	2	3.23425	0.428564	F	0	0	0	0	2	0	0	0	0	0	0	0	0	0	0	0	0	0	0	0	0	0	0	0
G10234.2	14	-	1102	6	full-splice_match	ENSMUSG00000037580	ENSMUST00000089959	2775	6	coding	241	726	209	934	47426724	47393255	FALSE	TRUE	TRUE	Full	3	2	4.31247	0.571436	T	0	0	0	0	0	0	0	0	0	0	0	0	0	0	2	0	0	0	0	0	0	0	0	0
G10235.1	14	-	4290	25	full-splice_match	ENSMUSG00000037572	ENSMUST00000187531	4260	25	coding	1118	3357	267	3623	47514054	47479069	FALSE	TRUE	TRUE	Full	4	1	3.79942	1	T	0	0	0	2	0	0	0	0	0	0	0	0	0	0	0	0	0	0	0	0	0	0	0	0
G10237.1	14	+	4528	4	full-splice_match	ENSMUSG00000021840	ENSMUST00000166743	4542	4	coding	242	729	134	862	47546028	47556880	FALSE	TRUE	TRUE	Full	1	2	3.69006	0.515511	T	0	0	0	0	0	0	0	0	0	0	0	0	0	0	0	0	0	0	0	0	0	0	0	0
G10237.2	14	+	1402	3	incomplete-splice_match	ENSMUSG00000021840	ENSMUST00000166743	4542	4	coding	266	801	134	934	47546028	47548654	FALSE	TRUE	FALSE	Full	1	2	3.46801	0.484489	F	0	0	0	0	0	0	0	0	0	0	0	0	0	0	0	0	0	0	0	0	0	0	0	0
G10239.2	14	+	1033	6	full-splice_match	ENSMUSG00000050335	ENSMUST00000150290	1298	6	coding	264	795	121	915	47616984	47623137	FALSE	TRUE	TRUE	Full	5	2	3.1517	0.484918	F	0	0	0	0	0	0	0	0	0	0	0	0	0	0	0	0	0	0	0	0	0	2	0	0
G10239.3	14	+	991	6	full-splice_match	ENSMUSG00000050335	ENSMUST00000142734	1419	6	coding	264	795	80	874	47616984	47623137	FALSE	TRUE	TRUE	Full	3	2	3.34774	0.515082	T	0	0	0	0	0	0	0	0	0	0	0	0	0	0	0	0	0	2	0	0	0	2	0	0
G1024.11	1	-	3237	13	full-splice_match	ENSMUSG00000036766	ENSMUST00000049126	3632	13	coding	737	2214	101	2314	84673449	84348485	FALSE	TRUE	TRUE	Full	48	13	147.26	0.744401	T	227	195	150	126	36	77	69	23	95	101	139	67	46	76	96	6	61	80	8	87	122	62	134	25
G1024.12	1	-	2863	12	incomplete-splice_match	ENSMUSG00000036766	ENSMUST00000049126	3632	13	coding	549	1650	291	1940	84563054	84348485	FALSE	TRUE	TRUE	Full	5	13	5.18778	0.0262242	F	0	0	0	0	3	0	0	0	0	0	6	0	0	0	0	0	2	0	0	0	0	0	2	0
G1024.13	1	-	1993	7	incomplete-splice_match	ENSMUSG00000036766	ENSMUST00000049126	3632	13	coding	303	912	159	1070	84423299	84348485	FALSE	TRUE	TRUE	Full	4	13	3.30441	0.0167038	F	2	0	0	0	0	0	0	0	0	0	0	0	0	0	0	0	0	0	0	0	0	0	0	0
G1024.14	1	-	3176	12	novel_in_catalog	ENSMUSG00000036766	novel	3632	13	coding	699	2100	154	2253	84673449	84348485	FALSE	TRUE	TRUE	Full	7	13	4.24721	0.0214696	F	5	0	0	2	0	0	0	0	0	0	0	0	0	2	0	0	0	0	0	0	0	0	2	0
G1024.15	1	-	3012	12	novel_in_catalog	ENSMUSG00000036766	novel	3632	13	coding	662	1989	101	2089	84673449	84348485	FALSE	TRUE	TRUE	Full	5	13	3.73635	0.0188873	F	0	0	0	0	0	0	0	0	0	0	0	0	0	0	0	0	0	0	0	0	0	0	0	0
G1024.16	1	-	1655	5	incomplete-splice_match	ENSMUSG00000036766	ENSMUST00000049126	3632	13	coding	111	336	397	732	84361729	84348485	FALSE	TRUE	TRUE	Full	7	13	4.98271	0.0251876	F	0	0	0	0	0	4	0	0	0	0	0	0	0	0	0	3	0	0	0	0	4	2	0	0
G1024.17	1	-	1416	3	incomplete-splice_match	ENSMUSG00000036766	ENSMUST00000049126	3632	13	coding	111	336	158	493	84361729	84348485	FALSE	TRUE	TRUE	Full	5	13	3.40685	0.0172216	F	0	0	2	0	0	0	0	0	0	0	0	0	0	0	0	2	2	0	0	0	0	0	0	0
G1024.18	1	-	3138	12	novel_in_catalog	ENSMUSG00000036766	novel	3632	13	coding	693	2082	134	2215	84673449	84348485	FALSE	TRUE	TRUE	Full	7	13	4.77215	0.0241232	F	2	2	0	0	0	0	0	0	0	0	0	0	0	0	0	0	0	2	0	3	0	0	0	4
G1024.23	1	-	2710	13	full-splice_match	ENSMUSG00000036766	ENSMUST00000049126	3632	13	coding	737	2214	101	2314	84673449	84348485	FALSE	TRUE	TRUE	Full	5	13	3.28007	0.0165807	F	0	0	0	0	0	0	0	0	0	0	0	0	0	0	0	0	0	0	0	0	0	0	0	0
G1024.24	1	-	2647	13	full-splice_match	ENSMUSG00000036766	ENSMUST00000049126	3632	13	coding	737	2214	108	2321	84673449	84348485	FALSE	TRUE	TRUE	Full	10	13	3.88819	0.0196548	F	2	0	0	0	0	0	0	0	0	0	0	0	0	0	0	0	2	0	0	0	0	0	0	0
G1024.25	1	-	2509	13	full-splice_match	ENSMUSG00000036766	ENSMUST00000049126	3632	13	coding	737	2214	108	2321	84673449	84348485	FALSE	TRUE	FALSE	Full	7	13	3.72239	0.0188167	F	2	0	2	0	0	0	0	2	0	0	0	0	0	0	0	0	0	3	0	0	0	2	0	0
G1024.4	1	-	1282	2	incomplete-splice_match	ENSMUSG00000036766	ENSMUST00000049126	3632	13	coding	111	336	24	359	84361729	84348485	FALSE	TRUE	TRUE	Full	14	13	5.96097	0.0301327	F	0	0	0	0	5	0	0	3	0	0	0	0	0	3	0	7	0	2	9	0	2	2	0	0
G1024.8	1	-	2290	9	incomplete-splice_match	ENSMUSG00000036766	ENSMUST00000049126	3632	13	coding	303	912	456	1367	84423299	84348485	FALSE	TRUE	TRUE	Full	5	13	4.07451	0.0205967	F	0	2	2	0	0	0	0	0	0	0	4	0	0	0	0	2	0	0	0	0	0	0	0	0
G10241.10	14	+	3235	5	novel_not_in_catalog	ENSMUSG00000037536	novel	3132	4	coding	695	2088	516	2603	47766642	47768729	FALSE	TRUE	TRUE	Full	1	21	3.1627	0.0201884	F	0	0	2	0	0	0	0	0	0	0	0	0	0	0	0	0	0	0	0	0	0	0	0	0
G10241.11	14	+	3190	4	novel_in_catalog	ENSMUSG00000037536	novel	3490	6	coding	695	2088	420	2507	47766642	47768729	FALSE	TRUE	TRUE	Full	4	21	5.36585	0.0342518	F	0	0	0	0	0	4	0	0	0	0	3	0	2	0	0	0	0	0	0	0	3	0	0	0
G10241.13	14	+	2899	3	full-splice_match	ENSMUSG00000037536	ENSMUST00000227162	373	3	coding	715	2148	122	2269	47738278	47768729	FALSE	TRUE	TRUE	Full	1	21	3.38255	0.0215918	F	0	0	0	0	0	2	0	0	0	0	0	0	0	0	0	0	0	0	0	0	0	0	0	0
G10241.14	14	+	2568	4	full-splice_match	ENSMUSG00000037536	ENSMUST00000163324	3132	4	coding	695	2088	282	2369	47766642	47768729	FALSE	TRUE	TRUE	Full	1	21	3.62138	0.0231163	F	0	0	0	0	0	0	0	0	0	0	0	0	0	0	0	0	0	0	0	0	0	0	0	0
G10241.15	14	+	3052	4	full-splice_match	ENSMUSG00000037536	ENSMUST00000163324	3132	4	coding	695	2088	282	2369	47766642	47768729	FALSE	TRUE	TRUE	Full	42	21	15.8056	0.100891	F	13	12	11	13	3	18	0	4	7	2	21	8	10	6	16	0	16	8	0	10	8	4	20	3
G10241.16	14	+	3092	4	novel_not_in_catalog	ENSMUSG00000037536	novel	3418	7	coding	695	2088	323	2410	47766642	47768729	FALSE	TRUE	TRUE	Full	1	21	3.092	0.0197371	F	0	0	0	0	0	0	0	0	0	0	0	0	0	0	0	0	0	0	0	0	0	0	0	0
G10241.18	14	+	2491	3	full-splice_match	ENSMUSG00000037536	ENSMUST00000168833	2993	3	coding	695	2088	205	2292	47766642	47768729	FALSE	TRUE	TRUE	Full	4	21	3.91851	0.0250129	F	0	0	0	2	0	0	3	0	0	0	0	0	0	0	0	0	0	0	0	0	0	0	0	0
G10241.19	14	+	2975	3	full-splice_match	ENSMUSG00000037536	ENSMUST00000168833	2993	3	coding	695	2088	205	2292	47766642	47768729	FALSE	TRUE	TRUE	Full	48	21	59.9737	0.382829	T	45	68	67	82	24	74	28	11	71	67	80	66	31	56	41	10	19	40	9	43	30	25	39	14
G10241.2	14	+	3454	6	novel_in_catalog	ENSMUSG00000037536	novel	3418	7	coding	695	2088	684	2771	47766642	47768729	FALSE	TRUE	TRUE	Full	15	21	4.51778	0.0288383	F	3	6	2	2	0	0	0	0	2	2	3	2	3	0	0	0	0	2	0	0	3	2	3	0
G10241.20	14	+	2381	2	full-splice_match	ENSMUSG00000037536	ENSMUST00000043112	2937	2	coding	695	2088	95	2182	47766642	47768729	FALSE	TRUE	TRUE	Full	1	21	3.38255	0.0215918	F	0	0	0	0	0	2	0	0	0	0	0	0	0	0	0	0	0	0	0	0	0	0	0	0
G10241.21	14	+	2814	2	full-splice_match	ENSMUSG00000037536	ENSMUST00000043112	2937	2	coding	695	2088	95	2182	47766642	47768729	FALSE	TRUE	TRUE	Full	5	21	3.33585	0.0212937	F	0	0	2	0	0	0	0	0	0	0	0	0	2	0	0	0	0	0	0	0	0	0	0	0
G10241.22	14	+	2865	2	full-splice_match	ENSMUSG00000037536	ENSMUST00000043112	2937	2	coding	695	2088	95	2182	47766642	47768729	FALSE	TRUE	TRUE	Full	40	21	11.8719	0.0757818	F	4	7	7	8	5	12	3	2	4	4	9	4	0	7	5	0	10	5	3	7	9	3	8	4
G10241.23	14	+	2675	2	full-splice_match	ENSMUSG00000037536	ENSMUST00000043112	2937	2	coding	695	2088	89	2176	47766642	47768729	FALSE	TRUE	TRUE	Full	1	21	2.91761	0.0186239	F	0	0	0	0	0	0	0	0	0	0	0	0	0	0	0	0	0	0	0	0	0	0	0	0
G10241.25	14	+	3111	3	full-splice_match	ENSMUSG00000037536	ENSMUST00000228740	354	3	coding	695	2088	323	2410	47766642	47768729	FALSE	FALSE	TRUE	Full	5	21	4.04244	0.025804	F	0	0	0	0	0	0	2	0	0	0	3	0	2	0	0	0	0	0	0	0	0	0	0	0
G10241.26	14	+	3121	4	novel_in_catalog	ENSMUSG00000037536	novel	354	3	coding	695	2088	352	2439	47766642	47768729	FALSE	TRUE	TRUE	Full	1	21	3.1072	0.0198341	F	0	0	0	0	0	0	0	0	0	0	0	0	0	0	0	0	0	0	0	0	0	0	0	0
G10241.27	14	+	3438	6	novel_in_catalog	ENSMUSG00000037536	novel	3159	4	coding	695	2088	663	2750	47766642	47768729	FALSE	TRUE	TRUE	Full	1	21	3.09713	0.0197698	F	0	2	0	0	0	0	0	0	0	0	0	0	0	0	0	0	0	0	0	0	0	0	0	0
G10241.3	14	+	3272	5	novel_in_catalog	ENSMUSG00000037536	novel	3418	7	coding	695	2088	502	2589	47766642	47768729	FALSE	TRUE	TRUE	Full	5	21	3.7926	0.0242092	F	0	0	0	0	0	2	0	0	0	2	0	3	0	0	0	0	0	0	0	0	0	0	2	0
G10241.5	14	+	3312	5	novel_in_catalog	ENSMUSG00000037536	novel	3418	7	coding	695	2088	537	2624	47766642	47768729	FALSE	TRUE	TRUE	Full	1	21	3.09713	0.0197698	F	0	2	0	0	0	0	0	0	0	0	0	0	0	0	0	0	0	0	0	0	0	0	0	0
G10241.6	14	+	3074	4	full-splice_match	ENSMUSG00000037536	ENSMUST00000163324	3132	4	coding	695	2088	355	2442	47766642	47768729	FALSE	TRUE	TRUE	Full	12	21	4.26195	0.0272053	F	0	0	2	0	0	2	2	2	0	0	2	0	2	0	0	0	0	0	0	0	0	0	2	3
G10241.7	14	+	3015	3	full-splice_match	ENSMUSG00000037536	ENSMUST00000227162	373	3	coding	715	2148	185	2332	47738278	47768729	FALSE	TRUE	TRUE	Full	26	21	5.52359	0.0352587	F	0	6	2	3	0	5	0	0	0	0	2	0	0	3	0	0	2	0	2	2	3	2	0	2
G10241.8	14	+	3423	3	full-splice_match	ENSMUSG00000037536	ENSMUST00000168833	2993	3	coding	695	2088	278	2365	47766642	47768729	FALSE	TRUE	TRUE	Full	1	21	5.38918	0.0344007	F	0	0	0	0	0	0	0	0	0	0	3	0	0	0	0	0	0	0	0	0	0	0	0	0
G10244.1	14	-	2777	5	incomplete-splice_match	ENSMUSG00000037526	ENSMUST00000042988	3450	10	coding	264	795	40	834	47786568	47780294	FALSE	TRUE	TRUE	Full	1	4	2.95845	0.0672679	F	0	0	0	0	0	0	0	0	0	0	0	0	0	0	0	0	0	0	0	0	0	0	0	0
G10244.3	14	-	3429	10	full-splice_match	ENSMUSG00000037526	ENSMUST00000042988	3450	10	coding	492	1479	9	1487	47805863	47780294	FALSE	TRUE	TRUE	Full	48	4	31.6029	0.718572	T	27	37	21	53	10	28	10	8	51	27	47	53	22	28	15	3	11	11	2	12	20	15	20	5
G10244.7	14	-	1859	10	full-splice_match	ENSMUSG00000037526	ENSMUST00000042988	3450	10	coding	492	1479	9	1487	47805863	47780294	FALSE	TRUE	TRUE	Full	3	4	6.05775	0.137738	F	0	0	0	0	0	0	0	0	0	0	0	0	0	0	0	0	0	0	0	0	0	0	0	0
G10244.8	14	-	1734	10	full-splice_match	ENSMUSG00000037526	ENSMUST00000042988	3450	10	coding	492	1479	9	1487	47805863	47780294	FALSE	TRUE	FALSE	Full	1	4	3.36102	0.0764213	F	0	0	0	0	0	0	0	0	0	0	0	0	0	0	0	0	0	0	0	0	0	0	0	0
G10246.1	14	+	4409	40	novel_in_catalog	ENSMUSG00000021843	novel	7945	43	coding	1253	3762	226	3987	47901244	47973592	FALSE	TRUE	TRUE	Full	1	25	3.51337	0.0329102	F	0	0	0	0	0	0	0	0	2	0	0	0	0	0	0	0	0	0	0	0	0	0	0	0
G10246.10	14	+	4176	38	novel_not_in_catalog	ENSMUSG00000021843	novel	4436	41	coding	1198	3597	152	3748	47901244	47973592	FALSE	TRUE	TRUE	Full	1	25	5.43568	0.0509167	F	0	0	0	0	0	0	0	0	0	0	0	0	0	0	0	0	0	0	0	0	0	0	0	0
G10246.11	14	+	2838	27	novel_in_catalog	ENSMUSG00000021843	novel	4436	41	coding	899	2697	142	2838	47901244	47946283	FALSE	TRUE	TRUE	Full	1	25	3.42035	0.0320389	F	0	0	0	0	0	0	0	0	0	0	0	0	0	0	0	0	2	0	0	0	0	0	0	0
G10246.13	14	+	4384	41	novel_in_catalog	ENSMUSG00000021843	novel	4484	42	coding	1276	3831	126	3956	47901244	47973592	FALSE	TRUE	TRUE	Full	3	25	3.30849	0.0309911	F	0	2	0	0	0	0	0	0	0	0	0	0	0	0	0	0	0	0	0	0	0	0	2	0
G10246.14	14	+	4219	39	novel_in_catalog	ENSMUSG00000021843	novel	4436	41	coding	1223	3672	126	3797	47901244	47973592	FALSE	TRUE	TRUE	Full	5	25	3.37928	0.0316542	F	0	0	0	2	0	2	0	0	0	0	2	0	0	0	0	0	0	0	0	0	0	0	0	0
G10246.15	14	+	4315	40	novel_in_catalog	ENSMUSG00000021843	novel	4484	42	coding	1253	3762	126	3887	47901244	47973592	FALSE	TRUE	TRUE	Full	11	25	4.10347	0.0384377	F	0	0	0	2	0	4	2	0	2	3	0	0	0	0	0	0	0	0	0	0	0	0	2	0
G10246.16	14	+	2168	13	incomplete-splice_match	ENSMUSG00000021843	ENSMUST00000190252	4436	41	coding	611	1836	126	1961	47901244	47929937	FALSE	TRUE	TRUE	Full	2	25	3.93497	0.0368594	F	0	0	0	0	0	3	0	0	0	0	0	0	0	2	0	0	0	0	0	0	0	0	0	0
G10246.17	14	+	4239	39	novel_in_catalog	ENSMUSG00000021843	novel	4484	42	coding	1229	3690	122	3811	47901244	47973592	FALSE	TRUE	TRUE	Full	20	25	5.59831	0.0524401	F	3	6	0	4	3	3	0	0	0	6	0	5	5	3	3	0	0	0	0	0	0	0	0	0
G10246.18	14	+	4152	38	novel_in_catalog	ENSMUSG00000021843	novel	4436	41	coding	1200	3603	122	3724	47901244	47973592	FALSE	TRUE	TRUE	Full	22	25	4.65168	0.0435729	F	0	3	0	4	3	3	0	0	2	0	0	4	3	4	0	0	0	0	0	0	0	0	0	0
G10246.20	14	+	4423	41	novel_in_catalog	ENSMUSG00000021843	novel	4484	42	coding	1276	3831	117	3947	47901244	47971716	FALSE	TRUE	TRUE	Full	1	25	3.31681	0.031069	F	2	0	0	0	0	0	0	0	0	0	0	0	0	0	0	0	0	0	0	0	0	0	0	0
G10246.22	14	+	4235	40	novel_in_catalog	ENSMUSG00000021843	novel	4484	42	coding	1252	3759	55	3813	47901244	47973592	FALSE	TRUE	TRUE	Full	1	25	3.51337	0.0329102	F	0	0	0	0	0	0	0	0	2	0	0	0	0	0	0	0	0	0	0	0	0	0	0	0
G10246.23	14	+	4148	39	novel_in_catalog	ENSMUSG00000021843	novel	4436	41	coding	1223	3672	55	3726	47901244	47973592	FALSE	TRUE	TRUE	Full	1	25	4.19419	0.0392875	F	0	0	0	0	0	0	0	0	0	0	0	0	0	3	0	0	0	0	0	0	0	0	0	0
G10246.24	14	+	4155	39	novel_in_catalog	ENSMUSG00000021843	novel	4436	41	coding	1224	3675	55	3729	47901244	47973592	FALSE	TRUE	TRUE	Full	2	25	3.154	0.0295439	F	0	0	2	0	0	0	0	0	0	0	0	0	0	0	0	0	0	0	0	0	0	0	0	0
G10246.25	14	+	4291	40	novel_in_catalog	ENSMUSG00000021843	novel	4484	42	coding	1276	3831	33	3863	47901244	47973592	FALSE	TRUE	TRUE	Full	1	25	2.75893	0.0258432	F	0	0	0	0	0	0	0	0	0	0	0	0	0	0	0	0	0	0	0	0	0	0	0	0
G10246.26	14	+	4222	39	full-splice_match	ENSMUSG00000021843	ENSMUST00000188553	3918	39	coding	1253	3762	33	3794	47901244	47973592	FALSE	TRUE	TRUE	Full	5	25	3.18266	0.0298123	F	0	2	0	0	0	0	0	0	2	0	0	0	0	0	0	0	0	0	0	0	0	0	0	0
G10246.27	14	+	4144	38	full-splice_match	ENSMUSG00000021843	ENSMUST00000185343	3846	38	coding	1229	3690	33	3722	47901244	47973592	FALSE	TRUE	TRUE	Full	3	25	7.82038	0.0732545	T	0	0	0	0	0	0	0	0	8	0	0	0	0	0	0	0	0	0	0	0	0	0	0	0
G10246.28	14	+	4135	38	full-splice_match	ENSMUSG00000021843	ENSMUST00000188330	3819	38	coding	1224	3675	33	3707	47901244	47973592	FALSE	TRUE	TRUE	Full	2	25	6.81383	0.063826	F	0	3	0	0	0	0	0	0	0	0	5	0	0	0	0	0	0	0	0	0	0	0	0	0
G10246.29	14	+	4063	37	full-splice_match	ENSMUSG00000021843	ENSMUST00000189101	3761	37	coding	1200	3603	33	3635	47901244	47973592	FALSE	TRUE	TRUE	Full	3	25	4.53522	0.042482	F	0	0	0	0	0	0	0	0	3	3	0	0	0	0	0	0	0	0	0	0	0	0	0	0
G10246.30	14	+	3995	39	full-splice_match	ENSMUSG00000021843	ENSMUST00000186761	3902	39	coding	1063	3192	376	3567	47904776	47973592	FALSE	FALSE	TRUE	Full	1	25	3.59279	0.0336541	F	0	0	0	0	0	0	0	0	0	0	2	0	0	0	0	0	0	0	0	0	0	0	0	0
G10246.39	14	+	1130	9	novel_not_in_catalog	ENSMUSG00000021843	novel	4100	2	coding	149	450	253	702	47962142	47973592	FALSE	TRUE	TRUE	Full	2	25	6.8808	0.0644533	F	0	0	0	0	0	0	0	0	0	0	0	0	0	0	0	0	0	0	0	0	0	0	0	0
G10246.4	14	+	3021	29	novel_in_catalog	ENSMUSG00000021843	novel	4436	41	coding	952	2856	164	3019	47901244	47949963	FALSE	TRUE	TRUE	Full	2	25	3.85655	0.0361247	F	0	0	0	0	0	0	0	0	0	0	0	0	0	0	0	0	0	0	0	0	2	0	0	0
G10246.45	14	+	557	2	incomplete-splice_match	ENSMUSG00000021843	ENSMUST00000189101	3761	37	non_coding	NA	NA	NA	NA	NA	NA	NA	TRUE	TRUE	Full	1	25	2.91761	0.0273296	F	0	0	0	0	0	0	0	0	0	0	0	0	0	0	0	0	0	0	0	0	0	0	0	0
G10246.5	14	+	4266	39	novel_in_catalog	ENSMUSG00000021843	novel	4436	41	coding	1224	3675	164	3838	47901244	47973592	FALSE	TRUE	TRUE	Full	13	25	4.95301	0.0463955	F	0	0	2	3	6	4	0	0	3	0	0	0	0	0	2	0	0	0	0	0	0	0	0	0
G10246.7	14	+	4326	40	novel_in_catalog	ENSMUSG00000021843	novel	4436	41	coding	1247	3744	155	3898	47901244	47973592	FALSE	TRUE	TRUE	Full	3	25	3.99699	0.0374404	F	0	0	0	0	0	3	0	0	0	0	2	0	0	0	0	0	0	0	0	0	0	0	0	0
G10246.8	14	+	2790	12	incomplete-splice_match	ENSMUSG00000021843	ENSMUST00000190252	4436	41	coding	604	1815	155	1969	47901244	47928455	FALSE	TRUE	TRUE	Full	2	25	3.92361	0.0367529	F	0	0	0	0	0	0	0	0	0	0	0	0	0	3	0	0	0	0	0	0	0	0	0	0
G10248.1	14	+	1276	7	novel_in_catalog	ENSMUSG00000021846	novel	779	6	coding	276	831	345	1175	48358614	48518931	FALSE	TRUE	TRUE	Full	3	3	3.17307	0.270906	F	0	0	0	0	0	0	0	0	0	2	0	0	0	0	0	0	0	0	2	2	0	0	0	0
G10248.2	14	+	1731	6	full-splice_match	ENSMUSG00000021846	ENSMUST00000073150	5900	6	coding	419	1260	235	1494	48358614	48494039	FALSE	TRUE	TRUE	Full	28	3	4.83591	0.412873	T	0	2	0	2	0	0	0	0	4	2	0	2	0	0	2	2	2	3	2	4	2	4	7	3
G10248.3	14	+	1601	5	full-splice_match	ENSMUSG00000021846	ENSMUST00000226828	3527	5	coding	319	960	405	1364	48477760	48494039	FALSE	TRUE	TRUE	Full	7	3	3.70386	0.316222	F	0	0	0	0	0	0	0	2	0	0	0	0	0	0	0	0	2	0	0	2	2	0	2	3
G10250.1	14	+	1490	4	novel_not_in_catalog	ENSMUSG00000036339	novel	2996	12	coding	121	366	186	551	48683913	48691052	FALSE	TRUE	TRUE	Full	3	2	3.36331	0.496869	F	0	0	0	0	0	0	0	0	2	0	0	0	0	0	0	0	2	0	0	0	0	0	0	0
G10250.5	14	+	2957	16	full-splice_match	ENSMUSG00000036339	ENSMUST00000111735	5485	16	coding	703	2112	77	2188	48683913	48749614	FALSE	TRUE	TRUE	Full	6	2	3.4057	0.503131	T	0	2	0	0	0	0	0	0	0	2	0	0	0	0	0	0	2	0	0	0	0	0	0	0
G10252.3	14	-	1830	6	novel_not_in_catalog	ENSMUSG00000021848	novel	2592	6	coding	167	504	300	803	48899994	48896163	FALSE	TRUE	TRUE	Full	1	5	3.69006	0.152323	F	0	0	0	0	0	0	0	0	0	0	0	0	0	0	0	0	0	0	0	0	0	0	0	0
G10252.4	14	-	2193	5	full-splice_match	ENSMUSG00000021848	ENSMUST00000152018	1033	5	coding	288	867	300	1166	48899994	48896163	FALSE	TRUE	TRUE	Full	44	5	9.70189	0.400487	T	9	15	5	6	3	7	0	2	9	6	15	6	7	6	3	0	4	3	4	0	2	3	5	0
G10252.5	14	-	2347	4	incomplete-splice_match	ENSMUSG00000021848	ENSMUST00000152018	1033	5	coding	288	867	454	1320	48899994	48896163	FALSE	TRUE	TRUE	Full	15	5	3.7373	0.154273	F	0	0	2	2	2	0	0	0	0	2	0	0	2	0	3	0	0	0	0	0	2	2	0	0
G10252.6	14	-	2217	5	full-splice_match	ENSMUSG00000021848	ENSMUST00000119070	1708	5	coding	296	891	300	1190	48899994	48896163	FALSE	TRUE	TRUE	Full	9	5	4.02091	0.16598	F	2	2	3	0	0	0	0	0	0	2	2	0	0	0	0	2	0	0	0	0	0	0	0	0
G10252.7	14	-	2340	4	full-splice_match	ENSMUSG00000021848	ENSMUST00000144465	723	4	coding	296	891	423	1313	48899994	48896163	FALSE	TRUE	TRUE	Full	1	5	3.07509	0.126937	F	0	0	0	0	0	0	0	0	0	0	0	0	0	0	0	0	0	0	0	0	2	0	0	0
G10254.10	14	-	2698	18	full-splice_match	ENSMUSG00000061244	ENSMUST00000162175	12699	18	coding	708	2127	196	2322	49303609	49251618	FALSE	TRUE	TRUE	Full	41	6	8.97773	0.295506	T	6	9	4	2	4	11	12	0	3	4	4	4	0	3	2	2	3	10	3	11	6	4	2	2
G10254.11	14	-	2670	18	full-splice_match	ENSMUSG00000061244	ENSMUST00000162175	12699	18	coding	708	2127	249	2375	49303609	49251618	FALSE	TRUE	TRUE	Full	10	6	4.16225	0.137002	F	0	0	0	0	0	2	0	0	0	0	0	0	0	0	0	0	0	0	0	2	3	0	0	0
G10254.12	14	-	2640	18	full-splice_match	ENSMUSG00000061244	ENSMUST00000162175	12699	18	coding	708	2127	258	2384	49303609	49251618	FALSE	TRUE	TRUE	Full	13	6	4.92691	0.162172	F	2	0	0	4	2	4	5	0	0	0	0	0	0	2	0	0	0	0	0	0	0	0	0	0
G10254.14	14	-	1666	4	incomplete-splice_match	ENSMUSG00000061244	ENSMUST00000162175	12699	18	coding	193	582	196	777	49303609	49286044	FALSE	TRUE	TRUE	Full	1	6	3.61348	0.118939	F	0	0	0	0	0	0	0	0	0	0	0	2	0	0	0	0	0	0	0	0	0	0	0	0
G10254.3	14	-	4339	18	full-splice_match	ENSMUSG00000061244	ENSMUST00000162175	12699	18	coding	708	2127	196	2322	49303609	49251618	FALSE	TRUE	TRUE	Full	34	6	5.36325	0.176534	F	2	3	6	6	4	5	2	0	0	2	2	4	0	0	0	0	0	2	3	0	3	2	3	0
G10254.9	14	-	2649	18	novel_not_in_catalog	ENSMUSG00000061244	novel	12699	18	coding	669	2010	245	2254	49303609	49251618	FALSE	TRUE	TRUE	Full	1	6	3.33721	0.109846	F	0	0	0	0	0	0	0	0	0	0	0	0	0	0	0	0	0	0	0	0	0	0	2	0
G10256.1	14	+	2301	9	novel_in_catalog	ENSMUSG00000036291	novel	2544	9	coding	490	1473	252	1724	49304248	49323784	FALSE	TRUE	TRUE	Full	4	17	4.2836	0.0588491	F	0	0	2	0	0	0	2	0	0	0	0	2	0	0	0	0	0	0	0	0	0	0	0	0
G10256.10	14	+	2354	9	novel_in_catalog	ENSMUSG00000036291	novel	2544	9	coding	490	1473	243	1715	49304248	49323784	FALSE	TRUE	TRUE	Full	24	17	7.29761	0.100256	F	6	2	0	7	6	4	8	5	0	0	7	3	4	2	4	0	2	4	2	0	0	0	0	0
G10256.11	14	+	2148	9	novel_in_catalog	ENSMUSG00000036291	novel	2544	9	coding	490	1473	243	1715	49304248	49323784	FALSE	TRUE	TRUE	Full	1	17	3.06646	0.0421277	F	0	0	0	0	0	0	0	0	0	0	0	0	0	0	0	0	0	0	0	0	0	2	0	0
G10256.12	14	+	1982	8	full-splice_match	ENSMUSG00000036291	ENSMUST00000037473	6321	8	coding	490	1473	243	1715	49304248	49323784	FALSE	TRUE	TRUE	Full	2	17	3.32821	0.0457238	F	0	0	0	0	0	0	0	0	2	0	0	0	0	0	0	0	0	0	0	0	0	0	0	0
G10256.13	14	+	2749	8	full-splice_match	ENSMUSG00000036291	ENSMUST00000037473	6321	8	coding	490	1473	243	1715	49304248	49323784	FALSE	TRUE	TRUE	Full	26	17	4.88679	0.0671359	F	0	2	0	2	3	3	0	0	2	3	0	0	0	0	3	0	2	3	0	2	0	0	2	0
G10256.14	14	+	2807	8	full-splice_match	ENSMUSG00000036291	ENSMUST00000037473	6321	8	coding	490	1473	243	1715	49304248	49323784	FALSE	TRUE	TRUE	Full	6	17	3.74082	0.0513923	F	0	0	0	0	0	0	0	0	0	3	0	2	0	0	0	0	0	0	0	3	0	2	0	0
G10256.16	14	+	3077	8	full-splice_match	ENSMUSG00000036291	ENSMUST00000037473	6321	8	coding	490	1473	243	1715	49304248	49323784	FALSE	TRUE	TRUE	Full	36	17	7.94707	0.109179	T	4	4	7	8	5	7	7	0	7	6	4	0	0	0	4	0	0	0	2	4	0	2	5	0
G10256.17	14	+	6194	8	full-splice_match	ENSMUSG00000036291	ENSMUST00000037473	6321	8	coding	490	1473	243	1715	49304248	49323784	FALSE	TRUE	TRUE	Full	2	17	3.40121	0.0467266	F	2	0	0	0	0	0	0	0	0	2	0	0	0	0	0	0	0	0	0	0	0	0	0	0
G10256.18	14	+	2644	7	novel_in_catalog	ENSMUSG00000036291	novel	6321	8	coding	434	1305	243	1547	49304248	49323713	FALSE	TRUE	TRUE	Full	1	17	4.73433	0.0650414	F	0	0	0	0	0	0	0	0	0	0	0	0	0	0	0	0	0	0	0	0	0	0	0	0
G10256.19	14	+	2848	6	novel_in_catalog	ENSMUSG00000036291	novel	6321	8	coding	418	1257	243	1499	49304248	49323784	FALSE	TRUE	TRUE	Full	1	17	3.14305	0.04318	F	0	0	0	0	0	0	0	0	0	0	0	0	0	0	0	0	0	0	0	0	0	0	0	0
G10256.2	14	+	2976	7	novel_in_catalog	ENSMUSG00000036291	novel	6321	8	coding	434	1305	252	1556	49304248	49323713	FALSE	TRUE	TRUE	Full	2	17	3.23411	0.0444309	F	0	0	0	0	0	0	0	0	0	0	0	0	0	0	0	0	0	0	0	0	0	0	0	0
G10256.20	14	+	2154	7	novel_in_catalog	ENSMUSG00000036291	novel	6321	8	coding	244	735	335	1069	49316170	49323784	FALSE	TRUE	TRUE	Full	1	17	3.46801	0.0476443	F	0	0	0	0	0	0	0	0	0	0	0	0	0	0	0	0	0	0	0	0	0	0	0	0
G10256.23	14	+	1973	2	full-splice_match	ENSMUSG00000036291	ENSMUST00000228238	3514	2	coding	307	924	216	1139	49304248	49311855	FALSE	TRUE	TRUE	Full	1	17	3.78186	0.0519561	F	0	0	0	0	0	0	0	0	0	0	0	0	0	0	0	2	0	0	0	0	0	0	0	0
G10256.24	14	+	2295	8	novel_in_catalog	ENSMUSG00000036291	novel	2544	9	coding	271	816	450	1265	49311589	49323784	FALSE	TRUE	TRUE	Full	1	17	3.65303	0.0501862	F	0	0	0	0	0	0	0	0	0	0	0	0	0	0	0	0	0	0	0	0	0	0	0	0
G10256.5	14	+	2414	7	novel_in_catalog	ENSMUSG00000036291	novel	6321	8	coding	244	735	344	1078	49316170	49323784	FALSE	TRUE	TRUE	Full	3	17	6.66657	0.0915869	F	0	0	0	0	0	0	0	0	0	0	0	0	0	0	0	0	0	0	0	0	0	0	0	0
G10256.6	14	+	2718	7	novel_in_catalog	ENSMUSG00000036291	novel	6321	8	coding	434	1305	251	1555	49304248	49323713	FALSE	TRUE	TRUE	Full	1	17	3.15622	0.0433609	F	0	0	0	0	0	0	0	0	0	0	0	0	0	0	0	0	0	0	0	0	0	0	0	0
G10256.9	14	+	2854	9	full-splice_match	ENSMUSG00000036291	ENSMUST00000227410	2544	9	coding	271	816	676	1491	49311589	49323784	FALSE	TRUE	TRUE	Full	1	17	3.00059	0.0412228	F	0	0	0	2	0	0	0	0	0	0	0	0	0	0	0	0	0	0	0	0	0	0	0	0
G10259.1	14	+	2932	5	full-splice_match	ENSMUSG00000036282	ENSMUST00000153488	4446	5	coding	364	1095	156	1250	49410074	49425144	FALSE	TRUE	TRUE	Full	8	4	5.42264	0.347093	T	4	3	4	0	0	0	2	0	5	0	0	2	2	0	0	0	0	0	0	0	0	0	0	0
G10259.2	14	+	4429	5	full-splice_match	ENSMUSG00000036282	ENSMUST00000153488	4446	5	coding	364	1095	134	1228	49410074	49425144	FALSE	TRUE	TRUE	Full	4	4	3.73381	0.238994	F	0	3	2	0	0	0	0	0	2	0	0	2	0	0	0	0	0	0	0	0	0	0	0	0
G10259.3	14	+	1325	5	full-splice_match	ENSMUSG00000036282	ENSMUST00000153488	4446	5	coding	364	1095	30	1124	49410074	49425144	FALSE	TRUE	TRUE	Full	1	4	3.20782	0.205326	F	0	0	0	0	0	0	0	0	0	0	0	0	0	0	2	0	0	0	0	0	0	0	0	0
G10259.6	14	+	4276	4	incomplete-splice_match	ENSMUSG00000036282	ENSMUST00000153488	4446	5	coding	364	1095	3	1097	49410074	49425144	FALSE	TRUE	TRUE	Full	2	4	3.25877	0.208587	F	0	0	0	0	2	0	0	0	0	0	0	0	0	0	0	0	0	0	0	0	0	0	0	0
G1026.5	1	-	1190	7	incomplete-splice_match	ENSMUSG00000026219	ENSMUST00000189670	2847	18	coding	284	855	24	878	84709358	84702339	FALSE	TRUE	TRUE	Full	1	3	3.76427	0.372617	T	0	0	0	0	0	0	0	0	0	0	0	0	0	0	0	0	0	0	0	0	0	0	0	0
G1026.7	1	-	2562	16	incomplete-splice_match	ENSMUSG00000026219	ENSMUST00000189670	2847	18	coding	636	1911	340	2250	84721662	84702339	FALSE	TRUE	TRUE	Full	1	3	2.91761	0.288808	F	0	0	0	0	0	0	0	0	0	0	0	0	0	0	0	0	0	0	0	0	0	0	0	0
G1026.8	1	-	2279	14	incomplete-splice_match	ENSMUSG00000026219	ENSMUST00000189670	2847	18	coding	636	1911	58	1968	84721662	84702339	FALSE	TRUE	TRUE	Full	1	3	3.42035	0.338574	F	0	0	0	0	0	0	0	0	0	0	0	0	0	0	0	0	2	0	0	0	0	0	0	0
G10261.1	14	-	1873	9	novel_not_in_catalog	ENSMUSG00000021852	novel	1931	8	coding	362	1089	586	1674	49556382	49536176	FALSE	TRUE	TRUE	Full	1	1	2.75893	1	T	0	0	0	0	0	0	0	0	0	0	0	0	0	0	0	0	0	0	0	0	0	0	0	0
G10266.1	14	-	4608	8	full-splice_match	ENSMUSG00000036242	ENSMUST00000036972	8831	8	coding	775	2328	104	2431	50020733	49919805	FALSE	TRUE	TRUE	Full	2	9	3.27262	0.0677633	F	0	0	2	0	0	2	0	0	0	0	0	0	0	0	0	0	0	0	0	0	0	0	0	0
G10266.10	14	-	2644	8	full-splice_match	ENSMUSG00000036242	ENSMUST00000036972	8831	8	coding	775	2328	108	2435	50020733	49919805	FALSE	TRUE	TRUE	Full	2	9	4.20552	0.0870798	F	0	0	0	0	0	3	0	0	0	0	0	0	0	0	0	0	0	0	0	0	0	0	2	0
G10266.11	14	-	2535	8	full-splice_match	ENSMUSG00000036242	ENSMUST00000036972	8831	8	coding	775	2328	104	2431	50020733	49919805	FALSE	TRUE	TRUE	Full	1	9	3.36131	0.0695996	F	0	0	0	0	2	0	0	0	0	0	0	0	0	0	0	0	0	0	0	0	0	0	0	0
G10266.2	14	-	3231	8	full-splice_match	ENSMUSG00000036242	ENSMUST00000036972	8831	8	coding	775	2328	113	2440	50020733	49919805	FALSE	TRUE	TRUE	Full	2	9	3.82197	0.079138	F	0	0	0	3	0	0	0	0	0	0	0	0	0	0	0	0	0	0	0	0	0	0	0	0
G10266.3	14	-	3148	8	full-splice_match	ENSMUSG00000036242	ENSMUST00000036972	8831	8	coding	775	2328	83	2410	50020733	49919805	FALSE	TRUE	TRUE	Full	1	9	3.38255	0.0700394	F	0	0	0	0	0	2	0	0	0	0	0	0	0	0	0	0	0	0	0	0	0	0	0	0
G10266.5	14	-	3101	8	full-splice_match	ENSMUSG00000036242	ENSMUST00000036972	8831	8	coding	775	2328	92	2419	50020733	49919805	FALSE	TRUE	TRUE	Full	43	9	11.6568	0.241367	T	13	5	11	12	9	7	0	2	12	6	13	7	5	8	8	0	6	8	2	9	7	3	9	3
G10266.6	14	-	2978	7	novel_in_catalog	ENSMUSG00000036242	novel	8831	8	coding	730	2193	104	2296	50020733	49919805	FALSE	TRUE	TRUE	Full	1	9	3.4856	0.0721732	F	0	0	0	0	0	0	0	0	0	2	0	0	0	0	0	0	0	0	0	0	0	0	0	0
G10266.8	14	-	3019	8	full-splice_match	ENSMUSG00000036242	ENSMUST00000036972	8831	8	coding	775	2328	92	2419	50020733	49919805	FALSE	TRUE	TRUE	Full	38	9	9.36191	0.193849	F	15	6	4	8	6	5	5	0	8	10	4	11	3	3	7	0	3	3	3	9	4	0	7	0
G10266.9	14	-	2748	8	full-splice_match	ENSMUSG00000036242	ENSMUST00000036972	8831	8	coding	775	2328	92	2419	50020733	49919805	FALSE	TRUE	TRUE	Full	37	9	5.74666	0.118991	F	5	8	2	6	4	2	4	0	4	2	5	2	2	5	3	0	0	2	0	2	4	0	2	6
G10267.1	14	-	1626	8	novel_in_catalog	ENSMUSG00000006288	novel	1842	10	coding	149	450	684	1133	51009757	51003360	FALSE	TRUE	TRUE	Full	2	9	4.219	0.0679852	F	0	0	0	0	0	0	0	0	0	0	0	0	0	0	0	0	0	0	0	0	0	0	0	0
G10267.10	14	-	2164	9	novel_in_catalog	ENSMUSG00000006288	novel	1842	10	coding	297	894	794	1687	51014836	51003360	FALSE	TRUE	TRUE	Full	1	9	3.1072	0.0500696	F	0	0	0	0	0	0	0	0	0	0	0	0	0	0	0	0	0	0	0	0	0	0	0	0
G10267.11	14	-	1730	9	novel_in_catalog	ENSMUSG00000006288	novel	1842	10	coding	181	546	26	571	51022942	51010789	TRUE	TRUE	TRUE	Full	3	9	3.15825	0.0508924	F	0	2	0	0	2	0	0	0	0	0	0	0	0	0	0	0	0	0	0	0	0	0	0	0
G10267.14	14	-	1765	9	novel_in_catalog	ENSMUSG00000006288	novel	1842	10	coding	420	1263	28	1290	51022942	51003360	FALSE	TRUE	TRUE	Full	1	9	2.91761	0.0470146	F	0	0	0	0	0	0	0	0	0	0	0	0	0	0	0	0	0	0	0	0	0	0	0	0
G10267.15	14	-	1675	9	novel_in_catalog	ENSMUSG00000006288	novel	1842	10	coding	368	1107	26	1132	51022942	51003428	FALSE	TRUE	TRUE	Full	1	9	3.06646	0.0494132	F	0	0	0	0	0	0	0	0	0	0	0	0	0	0	0	0	0	0	0	0	0	2	0	0
G10267.16	14	-	2392	4	full-splice_match	ENSMUSG00000006288	ENSMUST00000226768	2366	4	coding	185	558	37	594	51022945	51014708	FALSE	TRUE	TRUE	Full	8	9	4.1291	0.0665367	F	0	0	4	0	0	0	0	0	3	0	2	0	2	0	0	0	0	2	0	0	0	0	2	0
G10267.2	14	-	757	2	incomplete-splice_match	ENSMUSG00000006288	ENSMUST00000227751	497	3	non_coding	NA	NA	NA	NA	NA	NA	NA	TRUE	TRUE	Full	1	9	3.78186	0.0609412	F	0	0	0	0	0	0	0	0	0	0	0	0	0	0	0	2	0	0	0	0	0	0	0	0
G10267.7	14	-	1161	5	incomplete-splice_match	ENSMUSG00000006288	ENSMUST00000006451	1842	10	coding	149	450	235	684	51009757	51003360	FALSE	TRUE	TRUE	Full	1	9	3.17608	0.0511795	F	0	0	0	0	0	0	0	0	0	0	0	0	0	0	0	0	0	0	2	0	0	0	0	0
G10267.9	14	-	1818	10	full-splice_match	ENSMUSG00000006288	ENSMUST00000006451	1842	10	coding	439	1320	22	1341	51022942	51003360	FALSE	TRUE	TRUE	Full	48	9	34.502	0.555968	T	15	12	18	19	50	34	22	5	22	20	24	23	14	35	24	17	22	18	33	32	24	22	21	18
G10268.10	14	+	1594	14	incomplete-splice_match	ENSMUSG00000036023	ENSMUST00000036126	1894	16	coding	462	1389	102	1490	51049272	51058651	FALSE	TRUE	TRUE	Full	1	7	3.07509	0.0946178	F	0	0	0	0	0	0	0	0	0	0	0	0	0	0	0	0	0	0	0	0	2	0	0	0
G10268.2	14	+	1910	16	novel_not_in_catalog	ENSMUSG00000036023	novel	1894	16	coding	265	798	56	853	51045405	51054648	TRUE	TRUE	TRUE	Full	1	7	3.36131	0.103425	F	0	0	0	0	2	0	0	0	0	0	0	0	0	0	0	0	0	0	0	0	0	0	0	0
G10268.4	14	+	1584	14	novel_in_catalog	ENSMUSG00000036023	novel	1894	16	coding	462	1389	134	1522	51049272	51058651	FALSE	TRUE	TRUE	Full	1	7	3.3374	0.102689	F	0	0	0	0	0	0	0	0	0	0	0	0	0	0	0	0	0	0	0	0	0	0	0	0
G10268.6	14	+	1879	16	novel_in_catalog	ENSMUSG00000036023	novel	1894	16	coding	513	1542	232	1773	51047629	51058651	FALSE	TRUE	TRUE	Full	3	7	3.78294	0.116398	F	3	0	0	0	0	0	0	0	0	0	0	0	0	0	0	0	0	2	2	0	0	0	0	0
G10268.7	14	+	1811	16	full-splice_match	ENSMUSG00000036023	ENSMUST00000036126	1894	16	coding	559	1680	26	1705	51045405	51058651	FALSE	TRUE	TRUE	Full	48	7	10.4415	0.321276	T	2	5	7	4	8	12	7	4	9	7	3	7	5	5	9	6	4	4	14	7	6	12	5	4
G10268.8	14	+	2680	8	novel_in_catalog	ENSMUSG00000036023	novel	1894	16	coding	195	588	26	613	51045405	51053765	TRUE	TRUE	FALSE	Full	1	7	3.4856	0.107249	F	0	0	0	0	0	0	0	0	0	2	0	0	0	0	0	0	0	0	0	0	0	0	0	0
G10268.9	14	+	2197	15	full-splice_match	ENSMUSG00000036023	ENSMUST00000228672	2173	15	coding	377	1134	957	2090	51053724	51058651	FALSE	TRUE	TRUE	Full	11	7	5.01624	0.154345	F	0	0	0	0	2	0	0	0	2	4	0	0	2	0	0	0	0	0	0	2	0	6	0	0
G10269.1	14	-	1563	5	novel_not_in_catalog	ENSMUSG00000071470	novel	1509	4	coding	228	687	100	786	51031311	51027607	FALSE	TRUE	TRUE	Full	2	4	3.987	0.238847	F	0	0	0	0	0	0	0	0	0	0	2	0	0	0	0	0	0	0	0	0	0	0	0	2
G10269.2	14	-	1493	4	full-splice_match	ENSMUSG00000071470	ENSMUST00000095932	1509	4	coding	276	831	100	930	51031311	51027270	FALSE	TRUE	TRUE	Full	14	4	6.06799	0.363512	T	0	0	0	4	0	0	0	0	0	0	0	0	2	0	0	2	0	3	4	3	3	2	0	6
G10269.4	14	-	1264	2	novel_not_in_catalog	ENSMUSG00000071470	novel	444	3	non_coding	NA	NA	NA	NA	NA	NA	NA	TRUE	TRUE	Full	1	4	3.01633	0.180697	F	0	0	0	0	0	0	0	0	0	0	0	0	0	0	0	0	0	0	0	0	0	0	0	0
G10269.6	14	-	1191	2	novel_not_in_catalog	ENSMUSG00000071470	novel	444	3	non_coding	NA	NA	NA	NA	NA	NA	NA	TRUE	TRUE	Full	1	4	3.62138	0.216944	F	0	0	0	0	0	0	0	0	0	0	0	0	0	0	0	0	0	0	0	0	0	0	0	0
G10272.1	14	+	776	2	full-splice_match	ENSMUSG00000097431	ENSMUST00000181482	2513	2	non_coding	NA	NA	NA	NA	NA	NA	NA	TRUE	TRUE	Full	3	3	3.82811	0.36769	T	0	0	0	0	0	0	0	0	0	0	0	0	0	0	0	0	0	0	0	0	0	0	0	0
G10272.2	14	+	1644	2	full-splice_match	ENSMUSG00000097431	ENSMUST00000181482	2513	2	non_coding	NA	NA	NA	NA	NA	NA	NA	TRUE	TRUE	Full	1	3	3.49114	0.335324	F	0	0	0	0	0	0	0	0	0	0	0	0	0	0	0	0	0	0	0	0	0	0	0	0
G10272.8	14	+	1064	2	full-splice_match	ENSMUSG00000097431	ENSMUST00000181482	2513	2	non_coding	NA	NA	NA	NA	NA	NA	NA	TRUE	TRUE	Full	1	3	3.092	0.296987	F	0	0	0	0	0	0	0	0	0	0	0	0	0	0	0	0	0	0	0	0	0	0	0	0
G10275.10	14	-	1269	11	full-splice_match	ENSMUSG00000006289	ENSMUST00000159292	3388	11	coding	335	1008	87	1094	51162235	51153316	FALSE	TRUE	TRUE	Full	48	24	69.6101	0.405257	T	40	25	34	41	44	25	40	47	24	43	12	23	31	42	46	36	50	54	92	51	58	49	35	44
G10275.11	14	-	1264	11	novel_in_catalog	ENSMUSG00000006289	novel	3388	11	coding	254	765	325	1089	51157240	51153316	FALSE	TRUE	TRUE	Full	13	24	5.78387	0.0336726	F	2	0	0	0	0	0	0	0	0	0	0	0	0	0	0	2	0	0	3	0	3	6	0	0
G10275.12	14	-	990	9	novel_in_catalog	ENSMUSG00000006289	novel	3388	11	coding	153	462	354	815	51154921	51153316	FALSE	TRUE	TRUE	Full	1	24	6.03265	0.035121	F	0	0	0	0	0	0	0	0	0	0	0	0	0	0	0	0	0	0	0	0	0	0	0	0
G10275.13	14	-	1211	10	novel_in_catalog	ENSMUSG00000006289	novel	3388	11	coding	214	645	108	752	51162235	51154140	TRUE	TRUE	TRUE	Full	10	24	3.3923	0.0197493	F	2	0	0	0	2	0	2	0	0	0	0	2	0	3	0	0	0	0	0	0	0	0	0	0
G10275.14	14	-	1732	9	novel_in_catalog	ENSMUSG00000006289	novel	1219	11	coding	118	357	1201	1557	51154307	51153316	FALSE	TRUE	TRUE	Full	1	24	3.092	0.0180011	F	0	0	0	0	0	0	0	0	0	0	0	0	0	0	0	0	0	0	0	0	0	0	0	0
G10275.15	14	-	1795	9	novel_in_catalog	ENSMUSG00000006289	novel	1308	11	coding	186	561	104	664	51162235	51154907	TRUE	TRUE	TRUE	Full	17	24	4.66713	0.0271712	F	0	0	5	0	0	0	0	0	0	0	0	0	0	0	2	0	2	2	0	2	2	0	3	0
G10275.17	14	-	1709	11	novel_not_in_catalog	ENSMUSG00000006289	novel	3388	11	coding	283	852	421	1272	51158609	51153922	TRUE	TRUE	TRUE	Full	1	24	3.4856	0.0202925	F	0	0	0	0	0	0	0	0	0	2	0	0	0	0	0	0	0	0	0	0	0	0	0	0
G10275.18	14	-	1991	8	novel_in_catalog	ENSMUSG00000006289	novel	1308	11	coding	186	561	104	664	51162235	51154907	TRUE	TRUE	TRUE	Full	29	24	5.57474	0.0324551	F	0	0	0	0	0	2	0	0	0	8	5	2	2	4	0	0	3	2	2	2	5	6	0	0
G10275.19	14	-	2046	8	novel_in_catalog	ENSMUSG00000006289	novel	1812	9	coding	105	318	402	719	51157240	51154907	TRUE	TRUE	TRUE	Full	3	24	3.97715	0.0231542	F	0	0	0	0	0	0	0	0	0	0	0	0	0	0	0	0	0	0	0	0	2	0	0	0
G10275.2	14	-	2128	12	full-splice_match	ENSMUSG00000006289	ENSMUST00000160393	2004	12	coding	254	765	156	920	51157240	51153316	TRUE	TRUE	TRUE	Full	1	24	3.67691	0.0214063	F	0	0	0	0	0	0	2	0	0	0	0	0	0	0	0	0	0	0	0	0	0	0	0	0
G10275.20	14	-	1248	11	novel_in_catalog	ENSMUSG00000006289	novel	1219	11	coding	254	765	310	1074	51157240	51153316	FALSE	TRUE	TRUE	Full	1	24	2.88641	0.0168041	F	0	0	0	0	0	0	0	0	0	0	0	0	0	0	0	0	0	0	0	0	0	0	0	0
G10275.21	14	-	1411	10	novel_in_catalog	ENSMUSG00000006289	novel	1308	11	coding	186	561	87	647	51162235	51154907	TRUE	TRUE	TRUE	Full	2	24	3.23411	0.0188284	F	0	0	0	0	0	0	0	0	0	0	0	0	0	0	0	0	0	0	0	0	0	0	0	0
G10275.22	14	-	1505	10	novel_in_catalog	ENSMUSG00000006289	novel	3388	11	coding	313	942	128	1069	51162235	51153922	TRUE	TRUE	TRUE	Full	9	24	3.45581	0.0201191	F	0	0	0	0	0	0	0	2	2	0	0	0	0	2	0	0	0	0	3	2	0	2	0	0
G10275.23	14	-	1402	9	novel_in_catalog	ENSMUSG00000006289	novel	3388	11	coding	214	645	104	748	51162235	51154140	TRUE	TRUE	TRUE	Full	2	24	4.99906	0.0291036	F	2	0	0	0	0	0	0	0	0	0	0	0	0	0	0	0	0	0	0	0	0	0	0	0
G10275.24	14	-	1921	8	novel_in_catalog	ENSMUSG00000006289	novel	1219	11	coding	105	318	278	595	51157240	51154907	TRUE	TRUE	TRUE	Full	2	24	4.39457	0.0255844	F	0	0	0	0	0	0	0	0	0	0	0	0	0	0	0	0	0	0	0	0	0	0	0	0
G10275.25	14	-	1649	10	novel_in_catalog	ENSMUSG00000006289	novel	3388	11	coding	228	687	103	789	51162235	51154638	TRUE	TRUE	TRUE	Full	1	24	5.20201	0.0302851	F	0	0	0	0	0	0	0	0	0	0	0	0	0	0	0	0	0	0	0	0	0	0	0	0
G10275.26	14	-	1771	9	full-splice_match	ENSMUSG00000006289	ENSMUST00000160890	1812	9	coding	118	357	1242	1598	51154307	51153316	FALSE	TRUE	TRUE	Full	1	24	3.78186	0.0220173	F	0	0	0	0	0	0	0	0	0	0	0	0	0	0	0	2	0	0	0	0	0	0	0	0
G10275.27	14	-	1829	9	novel_in_catalog	ENSMUSG00000006289	novel	3388	11	coding	228	687	87	773	51162235	51154638	TRUE	TRUE	TRUE	Full	1	24	3.42035	0.0199126	F	0	0	0	0	0	0	0	0	0	0	0	0	0	0	0	0	2	0	0	0	0	0	0	0
G10275.3	14	-	2418	11	full-splice_match	ENSMUSG00000006289	ENSMUST00000159292	3388	11	coding	335	1008	104	1111	51162235	51153316	FALSE	TRUE	TRUE	Full	8	24	4.19714	0.024435	F	0	0	0	0	0	2	0	0	0	0	0	2	0	0	0	0	0	0	0	0	2	2	0	0
G10275.4	14	-	1627	11	full-splice_match	ENSMUSG00000006289	ENSMUST00000159292	3388	11	coding	335	1008	128	1135	51162235	51153316	FALSE	TRUE	TRUE	Full	11	24	4.82758	0.0281053	F	0	0	0	0	2	0	0	0	0	0	0	0	0	0	0	0	0	2	0	0	0	2	0	0
G10275.5	14	-	937	9	incomplete-splice_match	ENSMUSG00000006289	ENSMUST00000162177	1219	11	coding	220	663	96	758	51157138	51153316	FALSE	TRUE	TRUE	Full	1	24	5.43568	0.0316455	F	0	0	0	0	0	0	0	0	0	0	0	0	0	0	0	0	0	0	0	0	0	0	0	0
G10275.7	14	-	1357	11	full-splice_match	ENSMUSG00000006289	ENSMUST00000006452	1308	11	coding	186	561	104	664	51162235	51154907	TRUE	TRUE	TRUE	Full	1	24	3.14305	0.0182983	F	0	0	0	0	0	0	0	0	0	0	0	0	0	0	0	0	0	0	0	0	0	0	0	0
G10275.8	14	-	1427	12	novel_not_in_catalog	ENSMUSG00000006289	novel	1219	11	coding	305	918	335	1252	51158609	51153316	FALSE	TRUE	TRUE	Full	1	24	3.092	0.0180011	F	0	0	0	0	0	0	0	0	0	0	0	0	0	0	0	0	0	0	0	0	0	0	0	0
G10275.9	14	-	1217	11	full-splice_match	ENSMUSG00000006289	ENSMUST00000162177	1219	11	coding	254	765	278	1042	51157240	51153316	FALSE	TRUE	TRUE	Full	8	24	10.4058	0.0605806	F	0	0	0	0	0	0	0	0	0	0	0	0	0	0	0	0	0	0	0	0	0	0	0	0
G10276.1	14	+	1702	4	novel_in_catalog	ENSMUSG00000035960	novel	1239	5	coding	106	321	130	450	51162727	51163239	TRUE	TRUE	TRUE	Full	5	12	3.54839	0.00909424	F	0	0	0	2	0	0	0	0	0	0	0	0	0	0	0	0	0	0	0	0	0	0	0	0
G10276.12	14	+	1408	4	full-splice_match	ENSMUSG00000035960	ENSMUST00000154288	935	4	coding	317	954	290	1243	51162727	51164430	FALSE	TRUE	TRUE	Full	48	12	69.1597	0.177251	F	28	26	44	38	49	23	31	36	29	46	27	36	32	60	39	44	42	51	58	63	33	38	35	27
G10276.13	14	+	1864	3	novel_in_catalog	ENSMUSG00000035960	novel	935	4	coding	106	321	290	610	51162727	51163239	TRUE	TRUE	TRUE	Full	2	12	2.9675	0.00760546	F	0	0	0	0	0	0	0	0	0	0	0	0	0	0	0	0	0	0	2	0	0	0	0	0
G10276.14	14	+	1600	3	novel_in_catalog	ENSMUSG00000035960	novel	935	4	non_coding	NA	NA	NA	NA	NA	NA	NA	TRUE	TRUE	Full	12	12	3.85175	0.00987174	F	0	0	2	0	3	0	0	0	0	0	0	0	0	0	3	2	2	0	0	0	0	2	0	0
G10276.15	14	+	2056	2	novel_in_catalog	ENSMUSG00000035960	novel	935	4	non_coding	NA	NA	NA	NA	NA	NA	NA	TRUE	TRUE	Full	18	12	5.21165	0.013357	F	0	0	0	0	0	0	0	0	0	0	0	2	2	0	2	0	0	0	0	0	0	5	3	0
G10276.2	14	+	1363	4	incomplete-splice_match	ENSMUSG00000035960	ENSMUST00000136753	655	5	coding	165	498	135	632	51162727	51163872	FALSE	TRUE	TRUE	Full	3	12	3.45627	0.00885815	F	0	0	0	0	0	0	0	0	0	0	0	0	0	0	0	0	0	0	0	0	0	0	0	0
G10276.3	14	+	1901	3	novel_in_catalog	ENSMUSG00000035960	novel	655	5	non_coding	NA	NA	NA	NA	NA	NA	NA	TRUE	TRUE	Full	4	12	3.41808	0.00876025	F	0	0	0	0	0	0	0	0	0	0	0	0	0	0	0	0	0	0	0	0	0	0	0	0
G10276.4	14	+	2000	2	incomplete-splice_match	ENSMUSG00000035960	ENSMUST00000136753	655	5	non_coding	NA	NA	NA	NA	NA	NA	NA	TRUE	TRUE	Full	1	12	3.46801	0.00888822	F	0	0	0	0	0	0	0	0	0	0	0	0	0	0	0	0	0	0	0	0	0	0	0	0
G10276.5	14	+	1183	5	full-splice_match	ENSMUSG00000035960	ENSMUST00000049411	1239	5	coding	317	954	107	1060	51162727	51164430	FALSE	TRUE	TRUE	Full	6	12	9.1403	0.0234258	F	0	0	2	0	0	0	0	0	2	0	0	0	0	0	0	0	0	0	0	0	0	0	0	0
G10276.6	14	+	1225	5	full-splice_match	ENSMUSG00000035960	ENSMUST00000049411	1239	5	coding	317	954	107	1060	51162727	51164430	FALSE	TRUE	TRUE	Full	48	12	275.859	0.707005	T	117	140	161	102	140	137	159	170	110	153	108	134	109	181	225	208	173	191	243	228	190	165	151	118
G10276.8	14	+	1150	5	novel_not_in_catalog	ENSMUSG00000035960	novel	655	5	coding	288	867	112	978	51162727	51164430	FALSE	TRUE	TRUE	Full	3	12	6.47524	0.0165955	F	0	0	0	0	0	0	0	0	0	0	0	0	0	0	0	0	0	0	0	0	0	0	0	0
G10276.9	14	+	1788	3	incomplete-splice_match	ENSMUSG00000035960	ENSMUST00000136753	655	5	coding	106	321	112	432	51162727	51163239	FALSE	TRUE	TRUE	Full	1	12	3.62379	0.00928747	F	0	0	0	0	0	0	0	0	0	0	0	0	0	0	0	0	0	0	0	0	0	0	0	0
G10277.1	14	-	2743	7	full-splice_match	ENSMUSG00000035953	ENSMUST00000049312	1594	7	coding	181	546	374	919	51167635	51165351	FALSE	TRUE	TRUE	Full	1	37	3.00059	0.00702695	F	0	0	0	2	0	0	0	0	0	0	0	0	0	0	0	0	0	0	0	0	0	0	0	0
G10277.10	14	-	2348	5	incomplete-splice_match	ENSMUSG00000035953	ENSMUST00000049312	1594	7	non_coding	NA	NA	NA	NA	NA	NA	NA	TRUE	TRUE	Full	13	37	3.71816	0.0087074	F	0	0	0	3	0	0	0	0	0	0	2	0	0	0	2	0	2	2	0	0	0	0	0	0
G10277.11	14	-	1502	6	full-splice_match	ENSMUSG00000035953	ENSMUST00000162957	1465	6	non_coding	NA	NA	NA	NA	NA	NA	NA	TRUE	TRUE	Full	44	37	12.4116	0.0290661	F	0	3	4	2	2	4	5	3	3	7	6	5	5	10	10	2	10	9	5	0	0	6	11	7
G10277.12	14	-	1481	6	full-splice_match	ENSMUSG00000035953	ENSMUST00000161166	1445	6	non_coding	NA	NA	NA	NA	NA	NA	NA	TRUE	TRUE	Full	36	37	6.79489	0.0159127	F	2	2	0	0	0	4	4	4	3	0	3	0	3	4	5	3	3	3	0	0	0	2	4	2
G10277.13	14	-	1751	6	novel_in_catalog	ENSMUSG00000035953	novel	2755	7	coding	218	657	386	1042	51167635	51165383	FALSE	TRUE	TRUE	Full	21	37	4.72665	0.0110691	F	0	0	2	0	2	0	3	2	0	0	0	0	0	0	0	0	0	2	0	0	0	0	0	0
G10277.14	14	-	1739	6	novel_in_catalog	ENSMUSG00000035953	novel	1594	7	coding	218	657	374	1030	51167635	51165383	FALSE	TRUE	TRUE	Full	8	37	3.80526	0.00891137	F	0	0	0	0	3	0	2	0	0	0	0	0	0	0	0	0	0	0	0	0	0	0	0	2
G10277.15	14	-	2173	5	novel_in_catalog	ENSMUSG00000035953	novel	1594	7	non_coding	NA	NA	NA	NA	NA	NA	NA	TRUE	TRUE	Full	5	37	4.39955	0.0103031	F	0	0	0	0	0	0	0	0	0	0	0	0	0	0	2	0	0	0	0	0	0	2	2	0
G10277.16	14	-	2482	4	novel_in_catalog	ENSMUSG00000035953	novel	2755	7	non_coding	NA	NA	NA	NA	NA	NA	NA	TRUE	TRUE	Full	2	37	4.85963	0.0113806	F	3	0	3	0	0	0	0	0	0	0	0	0	0	0	0	0	0	0	0	0	0	0	0	0
G10277.17	14	-	2027	5	novel_in_catalog	ENSMUSG00000035953	novel	1465	6	coding	154	465	77	541	51168232	51167037	TRUE	TRUE	TRUE	Full	7	37	3.36321	0.00787617	F	0	0	2	0	0	0	0	0	0	2	0	0	0	0	2	0	0	0	0	0	0	0	0	0
G10277.18	14	-	2006	5	novel_in_catalog	ENSMUSG00000035953	novel	1594	7	coding	147	444	77	520	51168232	51167037	TRUE	TRUE	TRUE	Full	6	37	3.34989	0.00784496	F	0	0	0	0	0	0	0	0	0	0	0	0	0	0	0	0	0	0	0	0	0	2	0	0
G10277.19	14	-	2470	4	novel_in_catalog	ENSMUSG00000035953	novel	1465	6	non_coding	NA	NA	NA	NA	NA	NA	NA	TRUE	TRUE	Full	6	37	4.41081	0.0103295	F	0	0	0	0	0	0	0	0	2	0	2	0	0	3	0	0	0	0	0	0	0	0	0	0
G10277.2	14	-	2400	7	full-splice_match	ENSMUSG00000035953	ENSMUST00000160835	2755	7	coding	181	546	386	931	51167635	51165351	FALSE	TRUE	TRUE	Full	5	37	3.86672	0.00905529	F	0	0	0	2	0	0	0	0	0	0	2	0	0	0	0	0	0	0	0	0	0	0	0	0
G10277.20	14	-	2758	3	incomplete-splice_match	ENSMUSG00000035953	ENSMUST00000049312	1594	7	non_coding	NA	NA	NA	NA	NA	NA	NA	TRUE	TRUE	Full	3	37	3.76146	0.0088088	F	2	0	0	0	0	0	0	0	2	0	0	0	0	0	0	0	0	0	0	0	0	0	0	0
G10277.21	14	-	2852	2	incomplete-splice_match	ENSMUSG00000035953	ENSMUST00000049312	1594	7	non_coding	NA	NA	NA	NA	NA	NA	NA	TRUE	TRUE	Full	1	37	3.51337	0.00822781	F	0	0	0	0	0	0	0	0	2	0	0	0	0	0	0	0	0	0	0	0	0	0	0	0
G10277.22	14	-	1350	4	novel_in_catalog	ENSMUSG00000035953	novel	1465	6	non_coding	NA	NA	NA	NA	NA	NA	NA	TRUE	TRUE	Full	1	37	3.46801	0.00812158	F	0	0	0	0	0	0	0	0	0	0	0	0	0	0	0	0	0	0	0	0	0	0	0	0
G10277.23	14	-	2400	6	novel_in_catalog	ENSMUSG00000035953	novel	2755	7	coding	151	456	395	850	51167635	51166224	FALSE	TRUE	TRUE	Full	1	37	2.91761	0.00683262	F	0	0	0	0	0	0	0	0	0	0	0	0	0	0	0	0	0	0	0	0	0	0	0	0
G10277.24	14	-	1639	7	novel_in_catalog	ENSMUSG00000035953	novel	2755	7	coding	181	546	386	931	51167635	51165383	FALSE	TRUE	TRUE	Full	15	37	5.74995	0.0134656	F	0	3	0	3	0	0	5	0	0	2	0	0	0	5	0	0	3	4	0	0	0	2	0	0
G10277.25	14	-	1618	7	novel_in_catalog	ENSMUSG00000035953	novel	1594	7	coding	181	546	365	910	51167635	51165383	FALSE	TRUE	TRUE	Full	3	37	4.12514	0.0096605	F	0	0	0	0	0	0	0	0	0	0	0	0	0	0	0	0	0	0	0	0	0	0	0	0
G10277.27	14	-	1348	6	incomplete-splice_match	ENSMUSG00000035953	ENSMUST00000049312	1594	7	coding	181	546	127	672	51167635	51165351	FALSE	TRUE	TRUE	Full	10	37	6.3785	0.0149375	F	0	0	0	0	0	0	0	3	0	0	0	0	0	2	0	5	0	0	8	2	4	0	0	2
G10277.28	14	-	1607	7	full-splice_match	ENSMUSG00000035953	ENSMUST00000160835	2755	7	coding	181	546	386	931	51167635	51165351	FALSE	TRUE	TRUE	Full	48	37	171.628	0.401927	T	80	112	91	130	72	81	105	76	88	94	71	75	52	131	139	50	109	132	28	11	38	139	111	93
G10277.3	14	-	1649	7	novel_not_in_catalog	ENSMUSG00000035953	novel	1594	7	coding	177	534	400	933	51167635	51165383	FALSE	TRUE	TRUE	Full	2	37	3.76605	0.00881955	F	0	3	0	0	0	0	0	0	0	0	0	0	0	0	0	0	0	0	0	0	0	0	0	0
G10277.30	14	-	1586	7	full-splice_match	ENSMUSG00000035953	ENSMUST00000049312	1594	7	coding	181	546	365	910	51167635	51165351	FALSE	TRUE	TRUE	Full	45	37	105.943	0.248103	F	35	49	40	0	39	40	58	48	44	72	29	43	32	76	89	15	70	80	23	7	0	67	81	53
G10277.31	14	-	2029	6	novel_in_catalog	ENSMUSG00000035953	novel	1594	7	non_coding	NA	NA	NA	NA	NA	NA	NA	TRUE	TRUE	Full	15	37	4.14667	0.00971092	F	3	0	0	0	2	2	2	0	3	0	0	0	0	0	0	0	0	2	0	0	0	2	0	0
G10277.32	14	-	1439	6	novel_not_in_catalog	ENSMUSG00000035953	novel	1594	7	non_coding	NA	NA	NA	NA	NA	NA	NA	TRUE	TRUE	Full	1	37	2.95845	0.00692826	F	0	0	0	0	0	0	0	0	0	0	0	0	0	0	0	0	0	0	0	0	0	0	0	0
G10277.33	14	-	2193	5	novel_in_catalog	ENSMUSG00000035953	novel	2755	7	non_coding	NA	NA	NA	NA	NA	NA	NA	TRUE	TRUE	Full	7	37	3.40992	0.00798555	F	2	0	0	0	0	0	0	0	0	0	0	0	0	2	0	0	0	0	0	0	0	0	0	0
G10277.35	14	-	1627	7	novel_not_in_catalog	ENSMUSG00000035953	novel	2755	7	coding	177	534	386	919	51167635	51165383	FALSE	TRUE	TRUE	Full	12	37	6.92696	0.0162219	F	0	0	0	0	0	0	0	0	0	3	0	3	0	2	0	0	0	0	0	0	0	6	12	4
G10277.36	14	-	2563	3	novel_in_catalog	ENSMUSG00000035953	novel	1465	6	non_coding	NA	NA	NA	NA	NA	NA	NA	TRUE	TRUE	Full	1	37	3.42035	0.00800998	F	0	0	0	0	0	0	0	0	0	0	0	0	0	0	0	0	2	0	0	0	0	0	0	0
G10277.37	14	-	1410	5	novel_in_catalog	ENSMUSG00000035953	novel	1465	6	coding	169	510	386	895	51167635	51165190	FALSE	TRUE	TRUE	Full	1	37	3.19754	0.00748818	F	0	0	0	0	0	0	0	0	0	0	0	0	0	0	0	0	0	2	0	0	0	0	0	0
G10277.38	14	-	2829	4	novel_in_catalog	ENSMUSG00000035953	novel	877	5	coding	154	465	97	561	51168232	51167037	TRUE	TRUE	TRUE	Full	1	37	3.49114	0.00817575	F	0	0	0	0	0	0	0	0	0	0	0	0	0	0	0	0	0	0	0	0	0	0	0	0
G10277.39	14	-	3346	2	novel_in_catalog	ENSMUSG00000035953	novel	3232	3	coding	141	426	77	502	51168232	51167519	FALSE	TRUE	TRUE	Full	1	37	3.1627	0.00740659	F	0	0	2	0	0	0	0	0	0	0	0	0	0	0	0	0	0	0	0	0	0	0	0	0
G10277.4	14	-	2455	4	novel_in_catalog	ENSMUSG00000035953	novel	1594	7	non_coding	NA	NA	NA	NA	NA	NA	NA	TRUE	TRUE	Full	4	37	3.1668	0.0074162	F	0	0	0	0	0	0	0	0	0	2	0	0	0	0	0	0	0	2	0	0	0	2	0	0
G10277.41	14	-	2284	4	novel_in_catalog	ENSMUSG00000035953	novel	2755	7	non_coding	NA	NA	NA	NA	NA	NA	NA	TRUE	TRUE	Full	1	37	2.91761	0.00683262	F	0	0	0	0	0	0	0	0	0	0	0	0	0	0	0	0	0	0	0	0	0	0	0	0
G10277.42	14	-	1473	7	full-splice_match	ENSMUSG00000035953	ENSMUST00000160835	2755	7	coding	181	546	386	931	51167635	51165351	FALSE	TRUE	FALSE	Full	2	37	3.21727	0.00753438	F	0	2	0	0	0	0	0	0	0	0	0	0	0	0	0	0	0	0	0	0	0	0	0	0
G10277.6	14	-	1576	7	novel_not_in_catalog	ENSMUSG00000035953	novel	1594	7	coding	181	546	354	899	51167635	51165351	FALSE	TRUE	TRUE	Full	8	37	4.00698	0.00938377	F	0	0	0	0	0	0	0	0	0	3	0	0	0	0	0	0	0	2	0	0	0	0	0	0
G10277.7	14	-	1558	7	novel_not_in_catalog	ENSMUSG00000035953	novel	2755	7	non_coding	NA	NA	NA	NA	NA	NA	NA	TRUE	TRUE	Full	13	37	3.88756	0.00910411	F	0	0	0	0	0	0	4	0	2	0	2	0	0	0	2	0	2	3	0	0	0	0	0	0
G10277.8	14	-	1537	7	novel_not_in_catalog	ENSMUSG00000035953	novel	1594	7	non_coding	NA	NA	NA	NA	NA	NA	NA	TRUE	TRUE	Full	11	37	3.76629	0.0088201	F	2	0	0	0	0	0	0	0	0	0	0	0	0	0	0	0	0	3	0	0	0	2	0	0
G10277.9	14	-	2051	6	novel_in_catalog	ENSMUSG00000035953	novel	2755	7	non_coding	NA	NA	NA	NA	NA	NA	NA	TRUE	TRUE	Full	18	37	5.37777	0.012594	F	0	0	2	0	3	0	0	3	0	2	0	0	0	4	0	0	0	0	0	0	0	4	4	2
G10278.1	14	+	1556	8	novel_not_in_catalog	ENSMUSG00000115338	novel	1306	8	coding	369	1110	56	1165	51167624	51189078	FALSE	TRUE	TRUE	Full	2	6	4.19555	0.0315972	F	0	0	2	0	0	0	0	0	0	3	0	0	0	0	0	0	0	0	0	0	0	0	0	0
G10278.2	14	+	1542	8	novel_not_in_catalog	ENSMUSG00000115338	novel	1306	8	coding	338	1017	134	1150	51172722	51189078	FALSE	TRUE	TRUE	Full	1	6	2.95845	0.0222804	F	0	0	0	0	0	0	0	0	0	0	0	0	0	0	0	0	0	0	0	0	0	0	0	0
G10278.3	14	+	1503	7	novel_not_in_catalog	ENSMUSG00000115338	novel	1306	8	coding	336	1011	101	1111	51185050	51189078	FALSE	TRUE	TRUE	Full	2	6	3.95284	0.0297693	F	0	0	0	0	0	0	0	0	0	0	0	0	0	0	0	0	0	0	0	0	0	0	0	0
G10278.6	14	+	1338	6	full-splice_match	ENSMUSG00000115338	ENSMUST00000048615	2942	6	coding	289	870	78	947	51182040	51189078	FALSE	TRUE	TRUE	Full	48	6	114.681	0.863672	T	96	76	81	65	50	54	64	40	46	74	42	39	48	91	61	54	140	107	89	85	96	91	61	80
G10278.7	14	+	1719	5	incomplete-splice_match	ENSMUSG00000115338	ENSMUST00000048615	2942	6	coding	248	747	78	824	51182040	51188574	FALSE	TRUE	TRUE	Full	4	6	3.82485	0.0288054	F	0	0	0	0	0	0	0	0	0	0	0	0	0	0	0	0	0	0	2	0	0	0	3	0
G10278.8	14	+	1166	5	novel_in_catalog	ENSMUSG00000115338	novel	1306	8	coding	229	690	88	777	51182050	51189078	FALSE	TRUE	TRUE	Full	2	6	3.1703	0.0238759	F	0	0	0	0	0	0	0	0	0	0	0	0	0	0	0	0	0	2	0	0	0	0	0	0
G10279.1	14	+	1226	6	full-splice_match	ENSMUSG00000068417	ENSMUST00000095925	1372	6	coding	305	918	33	950	51193630	51201933	FALSE	TRUE	TRUE	Full	11	1	7.14187	1	T	0	0	0	0	0	0	0	0	0	0	0	0	0	0	0	0	0	0	0	0	0	0	0	0
G10280.1	14	+	1581	3	novel_not_in_catalog	ENSMUSG00000021876	novel	1518	2	coding	147	444	263	706	51342281	51342724	FALSE	TRUE	TRUE	Full	7	9	4.3325	0.0330278	F	0	0	0	0	0	0	0	0	0	0	0	2	0	0	0	2	0	0	0	0	2	0	0	0
G10280.10	14	+	1247	2	full-splice_match	ENSMUSG00000021876	ENSMUST00000022428	1518	2	coding	147	444	91	534	51342281	51342724	FALSE	TRUE	TRUE	Full	44	9	16.3819	0.124884	F	5	8	10	7	9	10	10	8	3	8	4	9	4	12	5	10	6	7	14	8	10	12	4	5
G10280.11	14	+	1409	2	full-splice_match	ENSMUSG00000021876	ENSMUST00000022428	1518	2	coding	147	444	91	534	51342281	51342724	FALSE	TRUE	TRUE	Full	48	9	86.9467	0.662817	T	27	43	52	57	48	34	53	71	51	49	43	44	33	57	46	48	49	36	49	53	57	29	25	37
G10280.16	14	+	1446	2	full-splice_match	ENSMUSG00000021876	ENSMUST00000169895	1460	2	coding	147	444	128	571	51342281	51342724	FALSE	TRUE	TRUE	Full	3	9	3.46996	0.0264524	F	0	0	0	0	0	0	0	0	0	0	0	0	0	2	0	0	0	0	2	0	0	0	0	0
G10280.17	14	+	698	2	full-splice_match	ENSMUSG00000072115	ENSMUST00000069011	1094	2	coding	145	438	98	535	51338861	51339298	FALSE	TRUE	TRUE	Full	1	9	3.32437	0.0253426	F	0	0	0	0	0	0	0	0	0	0	0	0	0	0	0	0	0	0	0	0	0	0	0	0
G10280.2	14	+	1882	3	novel_not_in_catalog	ENSMUSG00000021876	novel	1518	2	coding	147	444	564	1007	51342281	51342724	FALSE	TRUE	TRUE	Full	3	9	4.10102	0.0312631	F	0	0	0	0	0	0	0	0	0	0	0	0	0	0	0	0	0	0	0	0	0	0	0	0
G10280.6	14	+	1727	3	novel_not_in_catalog	ENSMUSG00000021876	novel	1518	2	coding	147	444	409	852	51342281	51342724	FALSE	TRUE	TRUE	Full	1	9	3.50876	0.0267482	F	0	0	0	0	0	0	0	2	0	0	0	0	0	0	0	0	0	0	0	0	0	0	0	0
G10280.7	14	+	692	2	full-splice_match	ENSMUSG00000072115	ENSMUST00000171688	728	2	coding	145	438	92	529	51338861	51339298	FALSE	TRUE	TRUE	Full	20	9	5.34801	0.0407692	F	0	0	0	0	0	0	0	0	0	0	0	2	3	0	0	5	0	0	0	0	0	2	0	0
G10280.9	14	+	1008	2	full-splice_match	ENSMUSG00000021876	ENSMUST00000022428	1518	2	coding	147	444	91	534	51342281	51342724	FALSE	TRUE	FALSE	Full	1	9	3.76427	0.028696	F	0	0	0	0	0	0	0	0	0	0	0	0	0	0	0	0	0	0	0	0	0	0	0	0
G10281.1	14	+	980	2	full-splice_match	ENSMUSG00000021880	ENSMUST00000095923	1072	2	coding	153	462	109	570	51367610	51368071	FALSE	TRUE	TRUE	Full	1	1	3.62379	1	T	0	0	0	0	0	0	0	0	0	0	0	0	0	0	0	0	0	0	0	0	0	0	0	0
G10282.1	14	-	1002	2	full-splice_match	ENSMUSG00000035896	ENSMUST00000080126	992	2	coding	149	450	106	555	51383352	51382903	FALSE	TRUE	TRUE	Full	2	2	4.53646	0.411515	F	0	0	0	0	0	0	0	0	0	0	0	0	2	0	0	0	0	0	0	0	0	0	0	0
G10282.2	14	-	825	2	full-splice_match	ENSMUSG00000035896	ENSMUST00000080126	992	2	coding	149	450	110	559	51383352	51382903	FALSE	TRUE	TRUE	Full	21	2	6.48735	0.588485	T	0	3	0	3	3	0	0	0	2	0	0	0	0	3	3	8	2	0	5	0	3	5	2	0
G10285.1	14	+	2170	12	novel_not_in_catalog	ENSMUSG00000004561	novel	1844	13	coding	157	474	399	872	52122853	52126426	TRUE	TRUE	TRUE	Full	1	24	3.62379	0.0343661	F	0	0	0	0	0	0	0	0	0	0	0	0	0	0	0	0	0	0	0	0	0	0	0	0
G10285.10	14	+	1735	14	novel_not_in_catalog	ENSMUSG00000004561	novel	1623	14	coding	237	714	29	742	52122403	52126426	TRUE	TRUE	TRUE	Full	1	24	3.4856	0.0330556	F	0	0	0	0	0	0	0	0	0	2	0	0	0	0	0	0	0	0	0	0	0	0	0	0
G10285.11	14	+	1719	14	novel_in_catalog	ENSMUSG00000004561	novel	1844	13	coding	261	786	29	814	52122403	52126689	TRUE	TRUE	TRUE	Full	4	24	4.97873	0.0472157	F	0	0	0	0	0	0	0	0	0	0	0	0	0	0	0	0	0	0	0	0	0	0	0	3
G10285.12	14	+	1468	13	full-splice_match	ENSMUSG00000004561	ENSMUST00000165100	1430	13	coding	236	711	29	739	52122403	52126995	TRUE	TRUE	TRUE	Full	14	24	3.99703	0.0379058	F	0	0	0	0	0	2	0	0	3	0	0	0	0	0	0	2	0	2	0	0	0	2	2	0
G10285.13	14	+	2704	10	novel_in_catalog	ENSMUSG00000004561	novel	1430	13	coding	248	747	29	775	52122403	52126340	TRUE	TRUE	TRUE	Full	2	24	6.38812	0.0605816	F	0	0	0	0	0	0	0	0	0	0	0	0	0	0	0	0	0	0	0	0	0	0	0	0
G10285.15	14	+	1521	14	novel_in_catalog	ENSMUSG00000004561	novel	1623	14	coding	302	909	481	1389	52124708	52129192	FALSE	TRUE	TRUE	Full	2	24	3.42331	0.0324649	F	0	0	0	0	0	0	0	0	0	2	0	0	0	0	0	0	0	0	0	0	0	0	0	0
G10285.16	14	+	1542	12	full-splice_match	ENSMUSG00000004561	ENSMUST00000163603	1513	12	coding	156	471	343	813	52122853	52126995	TRUE	TRUE	TRUE	Full	5	24	3.76985	0.0357513	F	0	0	0	0	0	0	0	0	0	0	0	0	0	5	0	0	0	0	0	0	2	2	0	0
G10285.18	14	+	1527	14	full-splice_match	ENSMUSG00000004561	ENSMUST00000047899	1623	14	coding	461	1386	17	1402	52122403	52129192	FALSE	TRUE	TRUE	Full	45	24	14.3552	0.136137	T	3	7	8	12	15	3	4	4	7	15	5	7	7	10	12	7	5	5	4	7	6	9	4	8
G10285.19	14	+	2147	12	novel_in_catalog	ENSMUSG00000004561	novel	1430	13	coding	248	747	17	763	52122403	52126340	TRUE	TRUE	TRUE	Full	42	24	8.2368	0.0781135	F	3	7	11	2	12	10	5	2	5	11	5	6	3	6	6	4	4	5	5	0	6	11	13	5
G10285.2	14	+	1817	12	incomplete-splice_match	ENSMUSG00000004561	ENSMUST00000047899	1623	14	coding	371	1116	67	1182	52122403	52128682	FALSE	TRUE	TRUE	Full	1	24	3.77923	0.0358402	F	0	0	0	0	0	0	0	0	0	0	0	0	0	0	0	0	0	0	0	0	0	0	0	0
G10285.20	14	+	2230	11	full-splice_match	ENSMUSG00000004561	ENSMUST00000166408	3404	11	coding	168	507	340	846	52122853	52126340	TRUE	TRUE	TRUE	Full	12	24	3.86777	0.0366799	F	0	2	0	0	0	0	2	2	0	0	2	3	2	0	0	0	0	0	0	2	2	4	0	0
G10285.21	14	+	3604	10	novel_in_catalog	ENSMUSG00000004561	novel	3404	11	coding	154	465	3016	3480	52127362	52129192	FALSE	TRUE	TRUE	Full	1	24	3.00059	0.028456	F	0	0	0	2	0	0	0	0	0	0	0	0	0	0	0	0	0	0	0	0	0	0	0	0
G10285.22	14	+	2025	13	novel_not_in_catalog	ENSMUSG00000004561	novel	1430	13	coding	237	714	14	727	52122403	52126426	TRUE	TRUE	TRUE	Full	1	24	3.36131	0.0318769	F	0	0	0	0	2	0	0	0	0	0	0	0	0	0	0	0	0	0	0	0	0	0	0	0
G10285.23	14	+	1895	14	novel_not_in_catalog	ENSMUSG00000004561	novel	1623	14	coding	237	714	9	722	52122403	52126426	TRUE	TRUE	TRUE	Full	1	24	3.33721	0.0316484	F	0	0	0	0	0	0	0	0	0	0	0	0	0	0	0	0	0	0	0	0	0	0	2	0
G10285.24	14	+	1553	13	novel_in_catalog	ENSMUSG00000004561	novel	1623	14	coding	381	1146	329	1474	52122853	52129192	FALSE	TRUE	TRUE	Full	1	24	3.61348	0.0342684	F	0	0	0	0	0	0	0	0	0	0	0	2	0	0	0	0	0	0	0	0	0	0	0	0
G10285.26	14	+	1596	13	novel_in_catalog	ENSMUSG00000004561	novel	1623	14	coding	381	1146	326	1471	52122853	52129192	FALSE	TRUE	TRUE	Full	3	24	3.17014	0.0300639	F	0	0	0	0	0	0	0	0	0	2	0	0	0	0	0	0	0	0	0	0	0	0	0	0
G10285.27	14	+	1387	12	incomplete-splice_match	ENSMUSG00000004561	ENSMUST00000165100	1430	13	coding	162	489	170	658	52122752	52126995	TRUE	TRUE	TRUE	Full	1	24	4.6965	0.0445392	F	0	0	0	0	0	0	0	0	0	0	0	0	2	0	0	0	0	0	0	0	0	0	0	0
G10285.3	14	+	1660	13	novel_in_catalog	ENSMUSG00000004561	novel	1844	13	coding	381	1146	390	1535	52122853	52129192	FALSE	TRUE	TRUE	Full	8	24	4.58381	0.0434705	F	0	0	0	0	0	0	0	0	2	3	0	0	0	2	0	0	0	0	0	0	0	2	0	0
G10285.4	14	+	2045	13	novel_in_catalog	ENSMUSG00000004561	novel	1430	13	coding	248	747	39	785	52122403	52126340	TRUE	TRUE	TRUE	Full	3	24	3.59202	0.0340649	F	0	0	0	0	0	2	0	0	0	0	0	0	0	0	0	0	0	0	0	3	0	0	0	0
G10285.5	14	+	2789	9	novel_in_catalog	ENSMUSG00000004561	novel	1461	13	coding	248	747	39	785	52122403	52126340	TRUE	TRUE	TRUE	Full	1	24	3.14531	0.0298285	F	0	0	0	0	0	0	0	0	0	0	0	0	0	0	0	0	0	0	0	0	0	0	0	0
G10285.6	14	+	1467	13	novel_in_catalog	ENSMUSG00000004561	novel	1430	13	coding	154	465	873	1337	52127362	52129192	FALSE	TRUE	TRUE	Full	2	24	4.10286	0.0389094	F	0	0	0	0	0	0	0	0	0	0	0	0	0	0	0	0	0	0	0	0	0	0	0	0
G10285.7	14	+	1612	15	novel_not_in_catalog	ENSMUSG00000004561	novel	1623	14	coding	302	909	579	1487	52124708	52129192	FALSE	TRUE	TRUE	Full	1	24	2.91761	0.0276691	F	0	0	0	0	0	0	0	0	0	0	0	0	0	0	0	0	0	0	0	0	0	0	0	0
G10285.8	14	+	1965	12	novel_in_catalog	ENSMUSG00000004561	novel	1844	13	coding	261	786	35	820	52122403	52126689	TRUE	TRUE	TRUE	Full	1	24	2.91761	0.0276691	F	0	0	0	0	0	0	0	0	0	0	0	0	0	0	0	0	0	0	0	0	0	0	0	0
G10285.9	14	+	1684	11	novel_in_catalog	ENSMUSG00000004561	novel	1844	13	coding	156	471	485	955	52122853	52126995	TRUE	TRUE	TRUE	Full	3	24	3.10264	0.0294238	F	0	2	0	0	0	0	0	0	0	0	0	0	0	0	0	0	0	0	0	0	0	0	0	0
G10286.1	14	+	2382	3	full-splice_match	ENSMUSG00000072572	ENSMUST00000160668	2508	3	coding	104	315	786	1100	52131257	52131981	FALSE	TRUE	TRUE	Full	1	1	3.09713	1	T	0	2	0	0	0	0	0	0	0	0	0	0	0	0	0	0	0	0	0	0	0	0	0	0
G10287.1	14	-	2172	16	full-splice_match	ENSMUSG00000004558	ENSMUST00000004673	2099	16	coding	371	1116	71	1186	52148997	52143597	FALSE	TRUE	TRUE	Full	2	74	3.40776	0.00237929	F	0	0	0	0	0	0	0	0	0	0	0	0	0	0	0	0	0	0	0	0	0	0	0	0
G10287.100	14	-	2165	14	novel_in_catalog	ENSMUSG00000004558	novel	2103	15	coding	176	531	778	1308	52145813	52143597	FALSE	TRUE	TRUE	Full	1	74	3.46801	0.00242136	F	0	0	0	0	0	0	0	0	0	0	0	0	0	0	0	0	0	0	0	0	0	0	0	0
G10287.101	14	-	1433	8	novel_in_catalog	ENSMUSG00000004558	novel	2103	15	coding	174	525	52	576	52146045	52143597	FALSE	TRUE	TRUE	Full	1	74	4.13839	0.00288942	F	0	0	0	0	0	0	0	0	0	0	0	0	0	0	0	0	0	0	0	0	0	0	0	0
G10287.102	14	-	1363	7	incomplete-splice_match	ENSMUSG00000004558	ENSMUST00000004673	2099	16	coding	114	345	162	506	52144744	52143597	FALSE	TRUE	TRUE	Full	13	74	4.97795	0.0034756	F	0	0	0	0	0	0	0	0	2	0	0	0	4	0	2	0	0	0	0	2	0	0	0	4
G10287.103	14	-	2751	14	novel_in_catalog	ENSMUSG00000004558	novel	2099	16	coding	239	720	54	773	52148997	52145521	TRUE	TRUE	TRUE	Full	1	74	3.76427	0.00262821	F	0	0	0	0	0	0	0	0	0	0	0	0	0	0	0	0	0	0	0	0	0	0	0	0
G10287.105	14	-	1959	14	novel_in_catalog	ENSMUSG00000004558	novel	2103	15	coding	345	1038	65	1102	52148997	52143597	FALSE	TRUE	TRUE	Full	1	74	3.15622	0.00220367	F	0	0	0	0	0	0	0	0	0	0	0	0	0	0	0	0	0	0	0	0	0	0	0	0
G10287.107	14	-	1107	2	novel_not_in_catalog	ENSMUSG00000004558	novel	2103	15	non_coding	NA	NA	NA	NA	NA	NA	NA	TRUE	TRUE	Full	1	74	4.38121	0.00305895	F	0	0	0	0	0	0	0	0	0	0	0	0	0	0	0	0	0	0	0	0	0	0	0	2
G10287.120	14	-	1919	14	novel_not_in_catalog	ENSMUSG00000004558	novel	2099	16	coding	313	942	64	1005	52148997	52143655	FALSE	TRUE	TRUE	Full	1	74	2.85755	0.00199514	F	0	0	0	0	0	0	0	0	0	0	0	0	0	0	0	0	0	0	0	2	0	0	0	0
G10287.125	14	-	2046	16	novel_not_in_catalog	ENSMUSG00000004558	novel	2099	16	coding	371	1116	75	1190	52148997	52143597	FALSE	TRUE	TRUE	Full	2	74	9.92126	0.00692701	F	0	0	0	0	0	0	0	0	0	0	0	0	0	0	0	0	0	0	0	0	0	0	0	0
G10287.126	14	-	2014	16	full-splice_match	ENSMUSG00000004558	ENSMUST00000004673	2099	16	coding	371	1116	43	1158	52148997	52143597	FALSE	TRUE	TRUE	Full	48	74	259.786	0.181382	F	153	140	85	170	134	135	288	37	123	164	125	187	107	255	183	41	167	232	148	186	200	115	141	145
G10287.127	14	-	2074	14	incomplete-splice_match	ENSMUSG00000004558	ENSMUST00000004673	2099	16	coding	284	855	364	1218	52147854	52143597	FALSE	TRUE	TRUE	Full	47	74	36.5701	0.0255332	F	19	19	8	9	17	11	15	6	6	9	2	12	5	10	13	6	29	17	11	10	16	17	14	4
G10287.131	14	-	2074	15	novel_in_catalog	ENSMUSG00000004558	novel	2103	15	coding	357	1074	145	1218	52148997	52143597	FALSE	TRUE	TRUE	Full	48	74	132.127	0.0922512	F	142	100	78	107	61	59	158	46	84	85	71	77	74	61	7	30	136	123	8	162	119	21	5	4
G10287.132	14	-	2601	14	novel_in_catalog	ENSMUSG00000004558	novel	2099	16	coding	284	855	891	1745	52147854	52143597	FALSE	TRUE	TRUE	Full	2	74	3.14783	0.00219781	F	0	0	0	0	0	0	0	0	0	0	0	0	0	0	0	0	0	0	0	0	0	0	2	0
G10287.134	14	-	1907	14	novel_not_in_catalog	ENSMUSG00000004558	novel	2103	15	coding	236	711	49	759	52148997	52144443	TRUE	TRUE	TRUE	Full	1	74	3.3374	0.00233017	F	0	0	0	0	0	0	0	0	0	0	0	0	0	0	0	0	0	0	0	0	0	0	0	0
G10287.136	14	-	1989	15	novel_in_catalog	ENSMUSG00000004558	novel	2099	16	coding	359	1080	54	1133	52148997	52143597	FALSE	TRUE	TRUE	Full	1	74	4.6608	0.00325416	F	0	0	0	0	0	0	0	0	0	0	0	0	0	0	0	0	0	0	0	0	0	0	0	0
G10287.137	14	-	1947	14	novel_in_catalog	ENSMUSG00000004558	novel	2103	15	coding	345	1038	54	1091	52148997	52143597	FALSE	TRUE	TRUE	Full	1	74	7.76799	0.0054236	F	0	0	0	0	0	0	0	0	0	0	0	0	0	0	0	0	0	0	0	0	0	0	0	0
G10287.141	14	-	1109	15	novel_not_in_catalog	ENSMUSG00000004558	novel	2099	16	coding	310	933	49	981	52148997	52142870	FALSE	TRUE	TRUE	Full	1	74	3.76427	0.00262821	F	0	0	0	0	0	0	0	0	0	0	0	0	0	0	0	0	0	0	0	0	0	0	0	0
G10287.155	14	-	2153	17	novel_not_in_catalog	ENSMUSG00000004558	novel	2099	16	coding	371	1116	183	1298	52148997	52143597	FALSE	TRUE	TRUE	Full	2	74	4.2993	0.00300177	F	0	0	0	0	0	0	0	0	0	0	2	0	0	0	0	0	0	0	0	0	0	0	3	0
G10287.16	14	-	1777	17	novel_not_in_catalog	ENSMUSG00000004558	novel	2099	16	coding	371	1116	117	1232	52148997	52143597	TRUE	TRUE	TRUE	Partial	6	74	5.47454	0.00382231	F	2	0	0	0	3	0	0	0	0	0	0	4	0	0	0	0	0	0	0	0	0	0	0	0
G10287.163	14	-	2098	16	novel_not_in_catalog	ENSMUSG00000004558	novel	2099	16	coding	357	1074	170	1243	52148997	52143597	FALSE	TRUE	TRUE	Full	1	74	3.17608	0.00221753	F	0	0	0	0	0	0	0	0	0	0	0	0	0	0	0	0	0	0	2	0	0	0	0	0
G10287.164	14	-	2179	16	novel_not_in_catalog	ENSMUSG00000004558	novel	2099	16	coding	357	1074	251	1324	52148997	52143597	FALSE	TRUE	TRUE	Full	7	74	5.38617	0.00376062	F	0	0	0	0	0	0	0	0	2	0	0	0	0	0	0	0	0	0	0	0	0	0	0	0
G10287.166	14	-	2187	15	full-splice_match	ENSMUSG00000004558	ENSMUST00000111632	2103	15	coding	357	1074	259	1332	52148997	52143597	FALSE	TRUE	TRUE	Full	48	74	453.017	0.316296	T	248	207	191	22	248	178	262	78	250	399	245	187	116	239	620	116	412	368	444	386	297	385	490	292
G10287.167	14	-	2190	16	novel_not_in_catalog	ENSMUSG00000004558	novel	2099	16	coding	416	1251	85	1335	52151848	52143597	FALSE	TRUE	TRUE	Full	1	74	2.95845	0.00206559	F	0	0	0	0	0	0	0	0	0	0	0	0	0	0	0	0	0	0	0	0	0	0	0	0
G10287.168	14	-	1856	13	incomplete-splice_match	ENSMUSG00000004558	ENSMUST00000004673	2099	16	coding	284	855	147	1001	52147854	52143597	FALSE	TRUE	TRUE	Full	20	74	5.47143	0.00382014	F	0	0	2	2	2	2	0	3	0	0	0	0	0	0	0	3	5	3	0	0	0	3	0	0
G10287.169	14	-	2691	14	novel_in_catalog	ENSMUSG00000004558	novel	2103	15	coding	284	855	982	1836	52147854	52143597	FALSE	TRUE	TRUE	Full	1	74	3.31681	0.00231579	F	2	0	0	0	0	0	0	0	0	0	0	0	0	0	0	0	0	0	0	0	0	0	0	0
G10287.17	14	-	1683	16	novel_not_in_catalog	ENSMUSG00000004558	novel	2103	15	coding	357	1074	65	1138	52148997	52143597	TRUE	TRUE	TRUE	Partial	1	74	3.69006	0.0025764	F	0	0	0	0	0	0	0	0	0	0	0	0	0	0	0	0	0	0	0	0	0	0	0	0
G10287.171	14	-	2224	14	novel_not_in_catalog	ENSMUSG00000004558	novel	2103	15	coding	284	855	515	1369	52147854	52143597	FALSE	TRUE	TRUE	Full	1	74	3.19754	0.00223252	F	0	0	0	0	0	0	0	0	0	0	0	0	0	0	0	0	0	2	0	0	0	0	0	0
G10287.173	14	-	1612	11	novel_not_in_catalog	ENSMUSG00000004558	novel	2103	15	coding	193	582	176	757	52146045	52143597	FALSE	TRUE	TRUE	Full	1	74	2.85755	0.00199514	F	0	0	0	0	0	0	0	0	0	0	0	0	0	0	0	0	0	0	0	2	0	0	0	0
G10287.174	14	-	2008	16	novel_not_in_catalog	ENSMUSG00000004558	novel	2099	16	coding	251	756	54	809	52148997	52144744	TRUE	TRUE	TRUE	Full	1	74	4.6965	0.00327909	F	0	0	0	0	0	0	0	0	0	0	0	0	2	0	0	0	0	0	0	0	0	0	0	0
G10287.175	14	-	1945	14	novel_in_catalog	ENSMUSG00000004558	novel	2103	15	coding	341	1026	65	1090	52148997	52143597	FALSE	TRUE	TRUE	Full	1	74	4.19992	0.00293238	F	0	0	0	0	0	0	0	0	0	0	0	0	0	0	0	0	0	0	0	0	0	0	0	0
G10287.177	14	-	2033	15	novel_not_in_catalog	ENSMUSG00000004558	novel	2103	15	coding	353	1062	117	1178	52148997	52143597	FALSE	TRUE	TRUE	Full	2	74	2.95099	0.00206038	F	0	0	0	0	0	0	0	0	0	0	0	0	0	0	0	0	0	0	0	0	0	0	0	0
G10287.18	14	-	1672	16	novel_not_in_catalog	ENSMUSG00000004558	novel	2103	15	coding	357	1074	54	1127	52148997	52143597	TRUE	TRUE	TRUE	Partial	15	74	7.36035	0.00513899	F	0	2	0	7	3	0	0	0	0	0	0	0	0	3	0	3	0	0	0	0	0	3	6	0
G10287.19	14	-	1694	16	novel_not_in_catalog	ENSMUSG00000004558	novel	2103	15	coding	357	1074	76	1149	52148997	52143597	TRUE	TRUE	TRUE	Partial	7	74	4.38616	0.00306241	F	3	0	5	0	0	2	0	0	2	0	0	2	0	0	0	0	0	0	0	2	0	0	0	0
G10287.2	14	-	2186	16	novel_in_catalog	ENSMUSG00000004558	novel	2099	16	coding	371	1116	85	1200	52148997	52143597	FALSE	TRUE	TRUE	Full	1	74	3.01633	0.002106	F	0	0	0	0	0	0	0	0	0	0	0	0	0	0	0	0	0	0	0	0	0	0	0	0
G10287.35	14	-	1940	14	novel_not_in_catalog	ENSMUSG00000004558	novel	2103	15	coding	303	912	114	1025	52148997	52143655	FALSE	TRUE	TRUE	Full	1	74	5.13053	0.00358213	F	0	0	0	0	0	0	0	0	0	0	0	0	0	0	0	0	3	0	0	0	0	0	0	0
G10287.4	14	-	2204	15	novel_in_catalog	ENSMUSG00000004558	novel	2103	15	coding	357	1074	145	1218	52148997	52143597	FALSE	TRUE	TRUE	Full	4	74	4.3698	0.00305099	F	0	0	0	0	0	0	0	0	0	0	0	0	0	0	0	0	0	0	0	0	0	0	0	0
G10287.40	14	-	1490	9	incomplete-splice_match	ENSMUSG00000004558	ENSMUST00000004673	2099	16	coding	193	582	52	633	52146045	52143597	FALSE	TRUE	TRUE	Full	35	74	14.0439	0.00980541	F	0	0	3	3	4	3	0	6	0	0	2	0	0	0	3	2	6	5	6	5	5	4	2	4
G10287.41	14	-	1566	10	incomplete-splice_match	ENSMUSG00000004558	ENSMUST00000004673	2099	16	coding	193	582	128	709	52146045	52143597	FALSE	TRUE	TRUE	Full	2	74	3.73527	0.00260796	F	0	0	0	0	0	0	0	0	0	0	0	0	0	0	0	0	0	0	0	0	0	0	0	0
G10287.43	14	-	2030	15	novel_not_in_catalog	ENSMUSG00000004558	novel	2103	15	coding	245	738	436	1173	52147543	52143597	FALSE	TRUE	TRUE	Full	1	74	3.36102	0.00234666	F	0	0	0	0	0	0	0	0	0	0	0	0	0	0	0	0	0	0	0	0	0	0	0	0
G10287.45	14	-	1971	15	novel_not_in_catalog	ENSMUSG00000004558	novel	2103	15	coding	284	855	260	1114	52147854	52143597	FALSE	TRUE	TRUE	Full	1	74	3.77923	0.00263865	F	0	0	0	0	0	0	0	0	0	0	0	0	0	0	0	0	0	0	0	0	0	0	0	0
G10287.47	14	-	2189	16	novel_in_catalog	ENSMUSG00000004558	novel	2099	16	coding	371	1116	217	1332	52148997	52143597	FALSE	TRUE	TRUE	Full	13	74	6.2377	0.00435516	F	0	0	0	0	0	0	0	0	0	0	0	0	0	0	0	0	0	0	0	0	0	2	0	0
G10287.5	14	-	2203	14	incomplete-splice_match	ENSMUSG00000004558	ENSMUST00000004673	2099	16	coding	284	855	364	1218	52147854	52143597	FALSE	TRUE	TRUE	Full	1	74	4.4542	0.00310992	F	0	0	0	0	0	0	0	0	0	0	0	0	0	0	0	0	0	0	0	0	0	0	0	0
G10287.50	14	-	2142	17	novel_not_in_catalog	ENSMUSG00000004558	novel	2099	16	coding	371	1116	170	1285	52148997	52143597	FALSE	TRUE	TRUE	Full	3	74	6.26017	0.00437084	F	0	0	0	0	0	0	0	0	0	3	0	0	0	0	0	0	0	2	0	0	0	0	0	0
G10287.51	14	-	2121	17	novel_not_in_catalog	ENSMUSG00000004558	novel	2099	16	coding	371	1116	149	1264	52148997	52143597	FALSE	TRUE	TRUE	Full	5	74	11.0834	0.00773841	F	0	0	0	0	0	0	0	0	0	0	0	0	0	0	0	0	0	0	0	0	0	0	0	0
G10287.52	14	-	2113	17	novel_not_in_catalog	ENSMUSG00000004558	novel	2099	16	coding	371	1116	141	1256	52148997	52143597	FALSE	TRUE	TRUE	Full	7	74	4.7703	0.00333062	F	0	0	0	0	3	0	0	0	0	0	0	0	0	3	0	0	0	0	0	3	0	0	0	0
G10287.53	14	-	2173	17	novel_not_in_catalog	ENSMUSG00000004558	novel	2099	16	coding	371	1116	201	1316	52148997	52143597	FALSE	TRUE	TRUE	Full	1	74	6.57181	0.00458843	F	0	0	0	0	0	0	0	0	0	0	0	0	0	0	0	0	0	0	0	0	0	0	0	3
G10287.54	14	-	2715	16	novel_in_catalog	ENSMUSG00000004558	novel	2099	16	coding	371	1116	743	1858	52148997	52143597	FALSE	TRUE	TRUE	Full	11	74	5.24926	0.00366503	F	0	2	0	5	0	0	6	0	0	0	0	0	0	0	0	0	0	0	0	0	3	2	0	0
G10287.57	14	-	2121	16	novel_in_catalog	ENSMUSG00000004558	novel	2099	16	coding	371	1116	149	1264	52148997	52143597	FALSE	TRUE	TRUE	Full	4	74	3.86986	0.00270193	F	0	0	0	0	0	0	0	0	2	0	0	0	0	0	0	0	0	0	0	0	0	0	0	0
G10287.59	14	-	2231	16	novel_in_catalog	ENSMUSG00000004558	novel	2099	16	coding	371	1116	259	1374	52148997	52143597	FALSE	TRUE	TRUE	Full	40	74	33.2778	0.0232345	F	2	54	2	4	4	33	0	8	37	5	0	4	0	3	6	27	48	18	0	53	4	74	3	4
G10287.61	14	-	2378	15	incomplete-splice_match	ENSMUSG00000004558	ENSMUST00000004673	2099	16	coding	371	1116	406	1521	52148997	52143597	FALSE	TRUE	TRUE	Full	5	74	15.0922	0.0105374	F	0	0	0	0	0	0	0	0	0	0	0	0	0	0	0	0	0	0	0	0	4	0	0	0
G10287.62	14	-	2220	16	novel_not_in_catalog	ENSMUSG00000004558	novel	2099	16	coding	284	855	509	1363	52147854	52143597	FALSE	TRUE	TRUE	Full	4	74	4.92141	0.00343612	F	0	0	0	0	0	0	0	0	0	0	0	0	3	0	0	0	0	0	0	0	0	0	0	0
G10287.63	14	-	2359	15	novel_in_catalog	ENSMUSG00000004558	novel	2103	15	coding	427	1284	219	1502	52148827	52143597	FALSE	TRUE	TRUE	Full	1	74	3.51337	0.00245303	F	0	0	0	0	0	0	0	0	2	0	0	0	0	0	0	0	0	0	0	0	0	0	0	0
G10287.67	14	-	1970	15	novel_not_in_catalog	ENSMUSG00000004558	novel	2103	15	coding	357	1074	40	1113	52148997	52143597	FALSE	TRUE	TRUE	Full	1	74	15.7811	0.0110184	F	0	0	0	0	0	0	0	0	0	0	0	0	0	0	0	0	0	0	0	0	0	0	0	0
G10287.68	14	-	2085	16	novel_not_in_catalog	ENSMUSG00000004558	novel	2103	15	coding	357	1074	155	1228	52148997	52143597	FALSE	TRUE	TRUE	Full	15	74	8.52504	0.00595217	F	0	0	0	0	5	2	0	0	0	2	2	2	0	2	0	0	0	3	0	0	0	3	0	0
G10287.69	14	-	2673	15	novel_in_catalog	ENSMUSG00000004558	novel	2103	15	coding	357	1074	743	1816	52148997	52143597	FALSE	TRUE	TRUE	Full	15	74	6.33198	0.00442098	F	0	0	0	4	0	0	0	0	0	2	0	0	0	0	4	0	2	0	0	0	4	3	0	0
G10287.7	14	-	1810	17	novel_not_in_catalog	ENSMUSG00000004558	novel	2099	16	coding	371	1116	145	1260	52148997	52143597	TRUE	TRUE	TRUE	Partial	3	74	4.08396	0.00285142	F	0	0	2	0	0	0	0	0	0	0	0	0	0	0	0	0	2	0	0	0	0	0	0	0
G10287.70	14	-	2501	15	novel_not_in_catalog	ENSMUSG00000004558	novel	2103	15	coding	357	1074	571	1644	52148997	52143597	FALSE	TRUE	TRUE	Full	5	74	3.42774	0.00239324	F	0	0	0	0	0	0	0	0	0	0	0	0	0	0	0	0	0	0	0	0	0	0	2	0
G10287.71	14	-	2041	15	novel_in_catalog	ENSMUSG00000004558	novel	2103	15	coding	357	1074	111	1184	52148997	52143597	FALSE	TRUE	TRUE	Full	11	74	4.70591	0.00328566	F	0	0	0	0	0	2	0	0	2	2	0	0	0	0	0	0	2	0	0	0	0	0	0	0
G10287.74	14	-	2080	15	novel_not_in_catalog	ENSMUSG00000004558	novel	2103	15	coding	357	1074	150	1223	52148997	52143597	FALSE	TRUE	TRUE	Full	2	74	3.91089	0.00273058	F	0	0	0	0	0	0	0	0	0	0	0	0	0	0	0	0	0	0	0	0	0	0	0	0
G10287.76	14	-	1940	14	incomplete-splice_match	ENSMUSG00000004558	ENSMUST00000111632	2103	15	coding	357	1074	10	1083	52148997	52143597	FALSE	TRUE	TRUE	Full	16	74	174.913	0.122124	F	0	0	0	254	0	0	0	0	0	0	0	0	2	0	2	0	0	0	2	3	0	0	3	0
G10287.78	14	-	2182	16	novel_not_in_catalog	ENSMUSG00000004558	novel	2099	16	coding	422	1269	57	1325	52150912	52143597	FALSE	TRUE	TRUE	Full	1	74	2.95845	0.00206559	F	0	0	0	0	0	0	0	0	0	0	0	0	0	0	0	0	0	0	0	0	0	0	0	0
G10287.79	14	-	2659	14	novel_in_catalog	ENSMUSG00000004558	novel	2103	15	coding	284	855	948	1802	52147854	52143597	FALSE	TRUE	TRUE	Full	5	74	3.64483	0.00254482	F	0	0	0	0	0	0	0	0	0	0	0	0	0	0	0	0	0	0	0	0	0	0	0	0
G10287.80	14	-	2047	14	novel_not_in_catalog	ENSMUSG00000004558	novel	2103	15	coding	284	855	336	1190	52147854	52143597	FALSE	TRUE	TRUE	Full	3	74	4.25401	0.00297014	F	0	0	0	0	0	0	0	0	0	0	0	0	0	0	0	0	0	0	0	0	0	0	0	0
G10287.81	14	-	1985	15	novel_not_in_catalog	ENSMUSG00000004558	novel	2103	15	coding	245	738	391	1128	52147543	52143597	FALSE	TRUE	TRUE	Full	1	74	3.15622	0.00220367	F	0	0	0	0	0	0	0	0	0	0	0	0	0	0	0	0	0	0	0	0	0	0	0	0
G10287.82	14	-	2027	16	novel_not_in_catalog	ENSMUSG00000004558	novel	2099	16	coding	304	915	256	1170	52148220	52143597	FALSE	TRUE	TRUE	Full	5	74	4.10814	0.0028683	F	0	0	0	0	0	3	2	0	0	0	0	0	0	2	0	0	0	0	0	0	3	0	0	2
G10287.83	14	-	2062	16	novel_not_in_catalog	ENSMUSG00000004558	novel	2099	16	coding	284	855	351	1205	52147854	52143597	FALSE	TRUE	TRUE	Full	3	74	3.9616	0.00276599	F	0	2	0	0	0	0	0	0	0	0	0	0	0	0	0	2	0	0	0	0	0	0	3	0
G10287.9	14	-	2939	13	novel_in_catalog	ENSMUSG00000004558	novel	2103	15	coding	284	855	1227	2081	52147854	52143597	FALSE	TRUE	TRUE	Full	4	74	4.24241	0.00296205	F	3	0	0	2	0	0	0	0	0	0	0	0	0	0	0	0	0	0	0	0	3	0	0	2
G10287.90	14	-	2265	15	novel_in_catalog	ENSMUSG00000004558	novel	2099	16	coding	284	855	554	1408	52147854	52143597	FALSE	TRUE	TRUE	Full	11	74	6.48168	0.0045255	F	0	0	0	3	0	2	0	0	0	4	0	7	0	3	0	0	0	0	0	5	5	0	0	0
G10287.91	14	-	2273	15	novel_in_catalog	ENSMUSG00000004558	novel	2099	16	coding	284	855	562	1416	52147854	52143597	FALSE	TRUE	TRUE	Full	10	74	5.81832	0.00406235	F	0	0	0	0	0	0	3	0	2	0	0	0	0	0	0	0	0	0	0	0	0	7	0	0
G10287.92	14	-	2223	14	novel_in_catalog	ENSMUSG00000004558	novel	2103	15	coding	284	855	512	1366	52147854	52143597	FALSE	TRUE	TRUE	Full	17	74	4.82437	0.00336837	F	0	2	0	0	2	0	0	0	5	0	2	2	0	0	0	0	0	0	0	0	0	0	0	0
G10287.93	14	-	2250	14	novel_in_catalog	ENSMUSG00000004558	novel	2103	15	coding	284	855	539	1393	52147854	52143597	FALSE	TRUE	TRUE	Full	11	74	5.01499	0.00350146	F	2	0	0	2	0	0	0	2	0	5	0	0	0	6	0	0	5	0	0	2	3	4	0	0
G10287.94	14	-	2565	14	novel_in_catalog	ENSMUSG00000004558	novel	2103	15	coding	284	855	854	1708	52147854	52143597	FALSE	TRUE	TRUE	Full	1	74	2.91761	0.00203707	F	0	0	0	0	0	0	0	0	0	0	0	0	0	0	0	0	0	0	0	0	0	0	0	0
G10287.95	14	-	2908	13	novel_in_catalog	ENSMUSG00000004558	novel	2103	15	coding	284	855	1197	2051	52147854	52143597	FALSE	TRUE	TRUE	Full	8	74	4.36628	0.00304853	F	0	0	0	0	0	0	0	0	0	0	0	0	2	0	0	0	0	0	0	0	0	0	2	0
G10287.98	14	-	1609	11	novel_in_catalog	ENSMUSG00000004558	novel	2103	15	coding	193	582	171	752	52146045	52143597	FALSE	TRUE	TRUE	Full	2	74	4.41733	0.00308417	F	2	0	0	0	0	0	0	0	0	0	0	0	0	0	0	0	0	0	0	0	0	0	0	0
G10288.1	14	-	1887	4	genic	ENSMUSG00000068392	novel	1412	1	coding	153	462	569	1030	52160137	52159676	FALSE	TRUE	TRUE	Full	1	1	2.95845	1	T	0	0	0	0	0	0	0	0	0	0	0	0	0	0	0	0	0	0	0	0	0	0	0	0
G10290.10	14	+	555	3	incomplete-splice_match	ENSMUSG00000004562	ENSMUST00000182217	638	5	non_coding	NA	NA	NA	NA	NA	NA	NA	TRUE	TRUE	Full	3	2	4.00862	0.559485	T	0	0	0	0	0	0	0	0	0	3	0	0	0	0	0	0	0	0	2	0	0	0	0	0
G10290.6	14	+	861	3	full-splice_match	ENSMUSG00000004562	ENSMUST00000183213	515	3	coding	112	339	438	776	52242662	52243000	FALSE	FALSE	TRUE	Full	1	2	3.15622	0.440515	F	0	0	0	0	0	0	0	0	0	0	0	0	0	0	0	0	0	0	0	0	0	0	0	0
G10292.1	14	+	932	2	novel_not_in_catalog	ENSMUSG00000115454	novel	908	2	coding	22	69	282	350	52258715	52258783	FALSE	TRUE	TRUE	Full	8	4	4.82109	0.306786	T	0	0	0	0	0	0	0	0	0	0	0	0	0	0	0	0	0	0	0	0	0	0	0	0
G10292.2	14	+	784	2	novel_not_in_catalog	ENSMUSG00000115454	novel	908	2	coding	22	69	253	321	52258715	52258783	FALSE	TRUE	FALSE	Full	1	4	4.73433	0.301266	F	0	0	0	0	0	0	0	0	0	0	0	0	0	0	0	0	0	0	0	0	0	0	0	0
G10292.3	14	+	1112	2	novel_not_in_catalog	ENSMUSG00000115454	novel	908	2	coding	22	69	242	310	52258715	52258783	FALSE	TRUE	TRUE	Full	1	4	3.14305	0.200006	F	0	0	0	0	0	0	0	0	0	0	0	0	0	0	0	0	0	0	0	0	0	0	0	0
G10292.4	14	+	3037	2	fusion	ENSMUSG00000115454_ENSMUSG00000115141	novel	908	2	non_coding	NA	NA	NA	NA	NA	NA	NA	TRUE	TRUE	Full	1	4	3.01633	0.191942	F	0	0	0	0	0	0	0	0	0	0	0	0	0	0	0	0	0	0	0	0	0	0	0	0
G10293.1	14	-	3082	9	full-splice_match	ENSMUSG00000060373	ENSMUST00000228198	2498	9	coding	306	921	178	1098	52321812	52312537	FALSE	TRUE	FALSE	Full	1	105	3.36131	0.00342186	F	0	0	0	0	2	0	0	0	0	0	0	0	0	0	0	0	0	0	0	0	0	0	0	0
G10293.10	14	-	2763	9	full-splice_match	ENSMUSG00000060373	ENSMUST00000228748	1691	9	coding	293	882	179	1060	52321812	52312537	FALSE	TRUE	TRUE	Full	25	105	5.54206	0.00564189	F	2	2	2	2	4	4	2	0	2	0	3	0	0	0	3	0	0	0	3	3	0	0	0	0
G10293.100	14	-	1747	9	full-splice_match	ENSMUSG00000060373	ENSMUST00000111610	2847	9	coding	313	942	179	1120	52321812	52312537	FALSE	TRUE	TRUE	Full	47	105	28.21	0.0287182	F	13	15	18	17	16	9	14	0	10	6	5	14	20	32	18	24	8	11	15	18	8	7	5	6
G10293.101	14	-	1721	8	novel_in_catalog	ENSMUSG00000060373	novel	2847	9	coding	313	942	153	1094	52321812	52312537	FALSE	TRUE	TRUE	Full	30	105	7.97714	0.00812084	F	2	0	0	0	6	3	0	3	2	3	2	9	3	11	0	0	4	7	3	4	0	5	0	0
G10293.102	14	-	1708	9	full-splice_match	ENSMUSG00000060373	ENSMUST00000227242	2617	9	coding	300	903	179	1081	52321812	52312537	FALSE	TRUE	TRUE	Full	48	105	64.0992	0.0652539	F	17	24	35	40	28	17	36	4	29	33	25	32	38	49	44	17	19	25	36	30	19	44	15	12
G10293.103	14	-	1616	9	novel_not_in_catalog	ENSMUSG00000060373	novel	1691	9	coding	248	747	179	925	52321812	52312601	FALSE	TRUE	TRUE	Full	1	105	7.24277	0.00737324	F	0	0	0	0	0	0	0	0	0	0	0	0	0	0	0	0	0	0	0	0	0	0	0	0
G10293.105	14	-	1953	10	novel_in_catalog	ENSMUSG00000060373	novel	2498	9	coding	306	921	408	1328	52321812	52312537	FALSE	TRUE	TRUE	Full	1	105	3.46801	0.00353048	F	0	0	0	0	0	0	0	0	0	0	0	0	0	0	0	0	0	0	0	0	0	0	0	0
G10293.106	14	-	1922	9	novel_not_in_catalog	ENSMUSG00000060373	novel	1691	9	coding	293	882	416	1297	52321812	52312537	FALSE	TRUE	TRUE	Full	1	105	3.46801	0.00353048	F	0	0	0	0	0	0	0	0	0	0	0	0	0	0	0	0	0	0	0	0	0	0	0	0
G10293.109	14	-	1544	8	novel_in_catalog	ENSMUSG00000060373	novel	2535	9	coding	293	882	153	1034	52321812	52312537	FALSE	TRUE	FALSE	Full	1	105	3.76427	0.00383207	F	0	0	0	0	0	0	0	0	0	0	0	0	0	0	0	0	0	0	0	0	0	0	0	0
G10293.11	14	-	2736	8	novel_in_catalog	ENSMUSG00000060373	novel	1691	9	coding	293	882	152	1033	52321812	52312537	FALSE	TRUE	TRUE	Full	3	105	3.21709	0.00327504	F	0	0	0	2	0	0	0	0	0	0	0	0	0	0	0	0	0	0	0	0	0	0	0	0
G10293.111	14	-	1554	10	novel_not_in_catalog	ENSMUSG00000060373	novel	2498	9	coding	306	921	343	1263	52321812	52312537	FALSE	TRUE	TRUE	Full	2	105	3.14145	0.00319804	F	0	0	0	0	0	0	0	0	0	0	0	0	0	0	2	0	0	0	0	0	2	0	0	0
G10293.113	14	-	1931	9	novel_in_catalog	ENSMUSG00000060373	novel	2847	9	coding	313	942	700	1641	52321812	52312537	FALSE	TRUE	TRUE	Full	2	105	3.12127	0.00317749	F	0	0	0	0	0	0	0	0	0	0	0	0	0	0	0	0	0	0	2	0	0	2	0	0
G10293.12	14	-	2822	9	full-splice_match	ENSMUSG00000060373	ENSMUST00000111610	2847	9	coding	313	942	178	1119	52321812	52312537	FALSE	TRUE	TRUE	Full	9	105	3.57406	0.00363844	F	0	0	0	0	3	0	0	0	2	0	0	2	0	0	0	0	0	0	0	0	2	2	0	0
G10293.123	14	-	2539	9	full-splice_match	ENSMUSG00000060373	ENSMUST00000228232	2535	9	coding	293	882	1375	2256	52321812	52312537	FALSE	TRUE	TRUE	Full	16	105	4.54128	0.00462308	F	0	0	0	0	0	0	0	0	3	3	3	0	0	3	4	0	0	0	0	0	0	0	0	2
G10293.124	14	-	1506	10	novel_not_in_catalog	ENSMUSG00000060373	novel	1691	9	coding	293	882	342	1223	52321812	52312537	FALSE	TRUE	TRUE	Full	5	105	4.02211	0.00409456	F	0	0	0	0	0	0	0	0	0	0	0	0	0	2	0	0	0	0	0	0	0	0	0	0
G10293.128	14	-	2607	9	novel_in_catalog	ENSMUSG00000060373	novel	2535	9	coding	313	942	1383	2324	52321812	52312537	FALSE	TRUE	TRUE	Full	1	105	4.38121	0.00446013	F	0	0	0	0	0	0	0	0	0	0	0	0	0	0	0	0	0	0	0	0	0	0	0	2
G10293.129	14	-	1253	8	novel_not_in_catalog	ENSMUSG00000060373	novel	2535	9	coding	147	444	153	596	52321812	52313181	TRUE	TRUE	TRUE	Full	1	105	4.4542	0.00453444	F	0	0	0	0	0	0	0	0	0	0	0	0	0	0	0	0	0	0	0	0	0	0	0	0
G10293.13	14	-	2784	9	full-splice_match	ENSMUSG00000060373	ENSMUST00000227242	2617	9	coding	300	903	179	1081	52321812	52312537	FALSE	TRUE	TRUE	Full	15	105	5.19309	0.00528664	F	0	0	0	6	2	5	4	0	2	0	0	2	0	0	0	0	0	0	2	2	4	5	0	0
G10293.135	14	-	2594	9	novel_in_catalog	ENSMUSG00000060373	novel	2535	9	coding	306	921	1393	2313	52321812	52312537	FALSE	TRUE	TRUE	Full	2	105	3.18202	0.00323934	F	0	0	0	0	0	0	0	0	0	0	0	0	0	0	2	0	0	0	0	0	0	0	0	0
G10293.136	14	-	2562	9	novel_in_catalog	ENSMUSG00000060373	novel	2535	9	coding	293	882	1400	2281	52321812	52312537	FALSE	TRUE	TRUE	Full	2	105	3.29948	0.00335892	F	0	0	0	0	0	0	0	0	0	0	0	0	0	0	0	0	0	0	0	0	0	0	0	0
G10293.137	14	-	2598	9	novel_in_catalog	ENSMUSG00000060373	novel	2535	9	coding	313	942	1376	2317	52321812	52312537	FALSE	TRUE	TRUE	Full	1	105	4.43767	0.00451761	F	0	0	0	0	0	0	0	0	0	0	0	0	0	0	0	0	0	0	0	0	0	0	0	0
G10293.138	14	-	1269	9	novel_not_in_catalog	ENSMUSG00000060373	novel	1691	9	coding	248	747	178	924	52321812	52312601	FALSE	TRUE	TRUE	Full	1	105	3.01633	0.00307066	F	0	0	0	0	0	0	0	0	0	0	0	0	0	0	0	0	0	0	0	0	0	0	0	0
G10293.14	14	-	2771	8	full-splice_match	ENSMUSG00000060373	ENSMUST00000227536	1301	8	coding	300	903	170	1072	52321812	52312537	FALSE	TRUE	TRUE	Full	1	105	5.04197	0.00513279	F	0	0	0	0	3	0	0	0	0	0	0	0	0	0	0	0	0	0	0	0	0	0	0	0
G10293.149	14	-	1607	10	novel_in_catalog	ENSMUSG00000060373	novel	2498	9	coding	306	921	407	1327	52321812	52312537	FALSE	TRUE	TRUE	Full	3	105	3.3099	0.00336952	F	0	0	0	2	0	0	0	2	0	0	0	0	0	0	0	0	2	0	0	0	0	0	0	0
G10293.15	14	-	1769	2	incomplete-splice_match	ENSMUSG00000060373	ENSMUST00000227242	2617	9	non_coding	NA	NA	NA	NA	NA	NA	NA	TRUE	TRUE	Full	4	105	5.20968	0.00530353	F	0	0	0	0	3	0	0	0	0	0	0	0	0	0	0	0	2	0	0	0	0	0	0	0
G10293.150	14	-	1379	9	full-splice_match	ENSMUSG00000060373	ENSMUST00000228198	2498	9	coding	306	921	179	1099	52321812	52312537	FALSE	TRUE	TRUE	Full	43	105	34.7111	0.0353364	F	10	12	0	13	16	16	21	13	0	25	22	22	22	33	36	25	12	23	34	19	20	36	18	21
G10293.151	14	-	1353	8	novel_in_catalog	ENSMUSG00000060373	novel	2498	9	coding	306	921	153	1073	52321812	52312537	FALSE	TRUE	TRUE	Full	40	105	12.8613	0.013093	F	3	6	5	3	4	3	5	12	0	13	5	4	7	0	21	9	0	7	18	10	0	13	4	6
G10293.152	14	-	901	6	incomplete-splice_match	ENSMUSG00000060373	ENSMUST00000228232	2535	9	coding	190	573	49	621	52319292	52312537	FALSE	TRUE	TRUE	Full	1	105	3.76427	0.00383207	F	0	0	0	0	0	0	0	0	0	0	0	0	0	0	0	0	0	0	0	0	0	0	0	0
G10293.153	14	-	1568	10	novel_in_catalog	ENSMUSG00000060373	novel	1691	9	coding	293	882	407	1288	52321812	52312537	FALSE	TRUE	TRUE	Full	8	105	3.38737	0.00344839	F	0	0	0	2	0	0	2	0	0	0	2	0	0	0	0	0	0	0	0	0	0	0	0	2
G10293.154	14	-	1340	9	full-splice_match	ENSMUSG00000060373	ENSMUST00000228748	1691	9	coding	293	882	179	1060	52321812	52312537	FALSE	TRUE	TRUE	Full	48	105	76.207	0.0775798	T	26	37	35	32	37	38	63	36	117	107	33	41	28	66	59	36	38	45	56	49	31	57	24	21
G10293.155	14	-	1843	9	novel_in_catalog	ENSMUSG00000060373	novel	2535	9	coding	293	882	682	1563	52321812	52312537	FALSE	TRUE	TRUE	Full	10	105	3.32906	0.00338903	F	0	2	0	2	0	0	0	0	3	0	2	0	0	2	0	0	2	0	0	0	0	0	0	0
G10293.156	14	-	1314	8	novel_in_catalog	ENSMUSG00000060373	novel	2535	9	coding	293	882	153	1034	52321812	52312537	FALSE	TRUE	TRUE	Full	47	105	15.0447	0.0153157	F	0	14	3	10	15	4	7	8	24	11	6	11	8	8	10	9	14	7	13	8	7	5	6	3
G10293.160	14	-	1563	10	novel_not_in_catalog	ENSMUSG00000060373	novel	2847	9	coding	313	942	342	1283	52321812	52312537	FALSE	TRUE	TRUE	Full	1	105	2.85755	0.00290902	F	0	0	0	0	0	0	0	0	0	0	0	0	0	0	0	0	0	0	0	2	0	0	0	0
G10293.161	14	-	1400	9	full-splice_match	ENSMUSG00000060373	ENSMUST00000111610	2847	9	coding	313	942	179	1120	52321812	52312537	FALSE	TRUE	TRUE	Full	40	105	27.0309	0.0275178	F	12	14	8	14	13	13	0	13	0	18	19	22	18	26	0	13	15	23	28	17	12	16	14	8
G10293.162	14	-	1374	8	novel_in_catalog	ENSMUSG00000060373	novel	2847	9	coding	313	942	153	1094	52321812	52312537	FALSE	TRUE	TRUE	Full	35	105	8.99618	0.00915823	F	0	3	0	3	7	5	6	5	4	7	4	5	0	10	0	0	8	4	0	5	4	0	0	0
G10293.163	14	-	2558	9	novel_in_catalog	ENSMUSG00000060373	novel	2535	9	coding	300	903	1376	2278	52321812	52312537	FALSE	TRUE	TRUE	Full	20	105	4.5783	0.00466077	F	0	0	3	3	0	2	3	0	2	3	2	2	0	0	0	0	0	0	0	0	0	0	0	2
G10293.164	14	-	1589	10	novel_in_catalog	ENSMUSG00000060373	novel	2617	9	coding	300	903	407	1309	52321812	52312537	FALSE	TRUE	TRUE	Full	7	105	3.69717	0.00376377	F	2	0	0	0	0	0	0	0	2	0	0	0	2	0	0	0	0	0	2	0	0	0	0	0
G10293.165	14	-	1525	10	novel_not_in_catalog	ENSMUSG00000060373	novel	2617	9	coding	300	903	343	1245	52321812	52312537	FALSE	TRUE	TRUE	Full	5	105	4.02601	0.00409853	F	0	0	0	0	0	0	0	0	0	0	0	0	0	2	0	2	0	0	0	0	0	0	0	0
G10293.166	14	-	1361	9	full-splice_match	ENSMUSG00000060373	ENSMUST00000227242	2617	9	coding	300	903	179	1081	52321812	52312537	FALSE	TRUE	TRUE	Full	44	105	67.6636	0.0688824	F	28	29	56	39	44	27	50	26	0	0	34	36	44	71	55	25	41	27	56	38	15	0	14	19
G10293.167	14	-	1864	9	novel_in_catalog	ENSMUSG00000060373	novel	2617	9	coding	300	903	682	1584	52321812	52312537	FALSE	TRUE	TRUE	Full	10	105	4.25357	0.00433019	F	0	2	2	0	4	2	0	0	0	0	0	0	2	0	0	2	0	0	0	0	0	0	0	0
G10293.168	14	-	1335	8	full-splice_match	ENSMUSG00000060373	ENSMUST00000227536	1301	8	coding	300	903	153	1055	52321812	52312537	FALSE	TRUE	TRUE	Full	42	105	10.8536	0.0110491	F	0	7	0	6	4	5	8	3	0	11	0	4	5	8	6	0	10	5	8	9	6	4	5	4
G10293.17	14	-	3104	9	novel_in_catalog	ENSMUSG00000060373	novel	2535	9	coding	293	882	682	1563	52321812	52312537	FALSE	TRUE	TRUE	Full	3	105	3.85172	0.0039211	F	0	0	0	0	0	0	0	0	0	0	2	0	0	0	0	0	0	0	0	0	0	0	0	0
G10293.2	14	-	3057	9	full-splice_match	ENSMUSG00000060373	ENSMUST00000227242	2617	9	coding	300	903	178	1080	52321812	52312537	FALSE	TRUE	FALSE	Full	1	105	2.88641	0.0029384	F	0	0	0	0	0	0	0	0	0	0	0	0	0	0	0	0	0	0	0	0	0	0	0	0
G10293.20	14	-	2850	10	novel_in_catalog	ENSMUSG00000060373	novel	2617	9	coding	300	903	408	1310	52321812	52312537	FALSE	TRUE	TRUE	Full	3	105	3.57625	0.00364067	F	0	0	0	0	0	2	0	0	0	0	0	0	0	0	2	0	0	0	0	0	0	0	0	0
G10293.21	14	-	3123	9	novel_in_catalog	ENSMUSG00000060373	novel	2617	9	coding	300	903	682	1584	52321812	52312537	FALSE	TRUE	TRUE	Full	1	105	3.00059	0.00305464	F	0	0	0	2	0	0	0	0	0	0	0	0	0	0	0	0	0	0	0	0	0	0	0	0
G10293.22	14	-	2152	6	incomplete-splice_match	ENSMUSG00000060373	ENSMUST00000228748	1691	9	coding	190	573	49	621	52319292	52312537	FALSE	TRUE	TRUE	Full	1	105	2.88641	0.0029384	F	0	0	0	0	0	0	0	0	0	0	0	0	0	0	0	0	0	0	0	0	0	0	0	0
G10293.25	14	-	2628	9	full-splice_match	ENSMUSG00000060373	ENSMUST00000228198	2498	9	coding	306	921	179	1099	52321812	52312537	FALSE	TRUE	TRUE	Full	39	105	27.1355	0.0276243	F	0	22	14	49	41	43	19	23	9	12	25	17	11	12	11	8	9	8	0	0	11	19	22	8
G10293.26	14	-	2602	8	novel_in_catalog	ENSMUSG00000060373	novel	2498	9	coding	306	921	153	1073	52321812	52312537	FALSE	TRUE	TRUE	Full	35	105	8.33829	0.00848849	F	0	0	0	3	0	16	0	4	9	2	3	5	6	4	4	3	0	0	0	4	5	6	0	5
G10293.27	14	-	2835	10	novel_in_catalog	ENSMUSG00000060373	novel	1691	9	coding	293	882	425	1306	52321812	52312537	FALSE	TRUE	TRUE	Full	3	105	3.58644	0.00365104	F	0	2	0	0	0	0	0	0	0	0	0	0	0	3	0	0	0	0	0	0	0	0	0	0
G10293.28	14	-	2752	10	novel_not_in_catalog	ENSMUSG00000060373	novel	1691	9	coding	293	882	342	1223	52321812	52312537	FALSE	TRUE	TRUE	Full	2	105	3.4874	0.00355022	F	0	0	0	0	2	0	0	0	0	0	0	2	0	0	0	0	0	0	0	0	0	0	0	0
G10293.29	14	-	2589	9	full-splice_match	ENSMUSG00000060373	ENSMUST00000228748	1691	9	coding	293	882	179	1060	52321812	52312537	FALSE	TRUE	TRUE	Full	47	105	48.1481	0.0490154	F	45	36	64	50	56	65	53	16	31	35	36	32	18	35	39	14	13	13	0	14	40	26	61	16
G10293.3	14	-	3026	9	full-splice_match	ENSMUSG00000060373	ENSMUST00000228198	2498	9	coding	306	921	179	1099	52321812	52312537	FALSE	TRUE	TRUE	Full	1	105	4.4542	0.00453444	F	0	0	0	0	0	0	0	0	0	0	0	0	0	0	0	0	0	0	0	0	0	0	0	0
G10293.30	14	-	2563	8	novel_in_catalog	ENSMUSG00000060373	novel	2535	9	coding	293	882	153	1034	52321812	52312537	FALSE	TRUE	TRUE	Full	41	105	10.2422	0.0104267	F	6	9	4	13	7	16	6	8	2	7	10	0	6	11	5	0	3	9	0	2	2	4	8	4
G10293.31	14	-	2877	10	novel_in_catalog	ENSMUSG00000060373	novel	2847	9	coding	313	942	407	1348	52321812	52312537	FALSE	TRUE	TRUE	Full	1	105	3.38255	0.00344348	F	0	0	0	0	0	2	0	0	0	0	0	0	0	0	0	0	0	0	0	0	0	0	0	0
G10293.32	14	-	2649	9	full-splice_match	ENSMUSG00000060373	ENSMUST00000111610	2847	9	coding	313	942	179	1120	52321812	52312537	FALSE	TRUE	TRUE	Full	44	105	22.5642	0.0229706	F	16	17	18	0	0	22	15	2	14	11	9	22	15	11	20	5	5	6	0	2	16	9	18	13
G10293.33	14	-	2623	8	novel_in_catalog	ENSMUSG00000060373	novel	2847	9	coding	313	942	153	1094	52321812	52312537	FALSE	TRUE	TRUE	Full	27	105	7.59806	0.00773493	F	0	0	4	0	6	6	9	3	0	4	9	0	0	0	2	0	0	2	0	0	0	2	2	0
G10293.34	14	-	2774	10	novel_not_in_catalog	ENSMUSG00000060373	novel	2617	9	coding	300	903	343	1245	52321812	52312537	FALSE	TRUE	TRUE	Full	1	105	3.36131	0.00342186	F	0	0	0	0	2	0	0	0	0	0	0	0	0	0	0	0	0	0	0	0	0	0	0	0
G10293.35	14	-	2610	9	full-splice_match	ENSMUSG00000060373	ENSMUST00000227242	2617	9	coding	300	903	179	1081	52321812	52312537	FALSE	TRUE	TRUE	Full	44	105	46.4867	0.0473241	F	60	31	0	58	37	50	28	16	38	28	43	38	21	31	34	13	10	11	0	30	25	23	0	6
G10293.36	14	-	2584	8	full-splice_match	ENSMUSG00000060373	ENSMUST00000227536	1301	8	coding	300	903	153	1055	52321812	52312537	FALSE	TRUE	TRUE	Full	40	105	8.26715	0.00841607	F	0	6	3	7	6	13	5	2	8	6	6	7	2	4	4	3	2	0	0	2	3	8	5	0
G10293.37	14	-	2070	4	incomplete-splice_match	ENSMUSG00000060373	ENSMUST00000227242	2617	9	coding	178	537	6	542	52315019	52312537	FALSE	TRUE	TRUE	Full	1	105	4.4542	0.00453444	F	0	0	0	0	0	0	0	0	0	0	0	0	0	0	0	0	0	0	0	0	0	0	0	0
G10293.38	14	-	2293	9	full-splice_match	ENSMUSG00000060373	ENSMUST00000228198	2498	9	coding	306	921	179	1099	52321812	52312537	FALSE	TRUE	TRUE	Full	1	105	3.01633	0.00307066	F	0	0	0	0	0	0	0	0	0	0	0	0	0	0	0	0	0	0	0	0	0	0	0	0
G10293.39	14	-	2078	9	full-splice_match	ENSMUSG00000060373	ENSMUST00000227242	2617	9	coding	300	903	180	1082	52321812	52312537	FALSE	TRUE	TRUE	Full	1	105	3.62379	0.00368906	F	0	0	0	0	0	0	0	0	0	0	0	0	0	0	0	0	0	0	0	0	0	0	0	0
G10293.4	14	-	2975	9	full-splice_match	ENSMUSG00000060373	ENSMUST00000228748	1691	9	coding	293	882	180	1061	52321812	52312537	FALSE	TRUE	TRUE	Full	3	105	3.61626	0.0036814	F	0	0	0	0	0	0	0	0	0	0	0	0	0	0	0	0	0	0	0	0	0	0	0	0
G10293.40	14	-	2023	9	full-splice_match	ENSMUSG00000060373	ENSMUST00000228198	2498	9	coding	306	921	178	1098	52321812	52312537	FALSE	TRUE	TRUE	Full	8	105	3.56234	0.00362651	F	0	0	0	0	0	0	0	0	0	0	0	0	0	0	0	0	0	0	0	2	0	0	0	0
G10293.41	14	-	2026	8	novel_in_catalog	ENSMUSG00000060373	novel	2498	9	coding	306	921	181	1101	52321812	52312537	FALSE	TRUE	TRUE	Full	2	105	3.02131	0.00307574	F	0	0	0	0	0	0	0	0	0	0	0	0	0	0	0	0	0	0	0	0	0	0	0	0
G10293.42	14	-	1985	9	full-splice_match	ENSMUSG00000060373	ENSMUST00000228748	1691	9	coding	293	882	179	1060	52321812	52312537	FALSE	TRUE	TRUE	Full	21	105	4.4329	0.00451275	F	0	2	0	3	2	0	3	0	0	0	2	2	0	0	0	0	0	2	4	2	0	3	0	0
G10293.43	14	-	2045	9	full-splice_match	ENSMUSG00000060373	ENSMUST00000111610	2847	9	coding	313	942	179	1120	52321812	52312537	FALSE	TRUE	TRUE	Full	5	105	3.54607	0.00360995	F	0	0	0	0	0	0	0	0	0	0	2	0	0	0	0	2	0	0	0	0	0	0	0	0
G10293.44	14	-	2019	8	novel_in_catalog	ENSMUSG00000060373	novel	2847	9	coding	313	942	153	1094	52321812	52312537	FALSE	TRUE	TRUE	Full	4	105	3.78641	0.00385462	F	0	0	0	0	0	0	2	0	0	0	0	0	0	0	0	0	0	0	0	0	0	0	0	0
G10293.45	14	-	2006	9	full-splice_match	ENSMUSG00000060373	ENSMUST00000227242	2617	9	coding	300	903	179	1081	52321812	52312537	FALSE	TRUE	TRUE	Full	18	105	4.85122	0.00493861	F	2	0	0	0	0	0	0	0	0	0	0	0	0	2	0	0	0	2	0	0	0	2	0	0
G10293.46	14	-	1946	8	novel_in_catalog	ENSMUSG00000060373	novel	1691	9	coding	293	882	152	1033	52321812	52312537	FALSE	TRUE	TRUE	Full	1	105	4.19992	0.00427557	F	0	0	0	0	0	0	0	0	0	0	0	0	0	0	0	0	0	0	0	0	0	0	0	0
G10293.47	14	-	1993	9	full-splice_match	ENSMUSG00000060373	ENSMUST00000111610	2847	9	coding	313	942	179	1120	52321812	52312537	FALSE	TRUE	TRUE	Full	1	105	3.76427	0.00383207	F	0	0	0	0	0	0	0	0	0	0	0	0	0	0	0	0	0	0	0	0	0	0	0	0
G10293.48	14	-	2930	9	novel_in_catalog	ENSMUSG00000060373	novel	2535	9	coding	306	921	1376	2296	52321812	52312537	FALSE	TRUE	TRUE	Full	2	105	4.18295	0.0042583	F	0	0	0	0	0	0	0	0	0	0	0	0	0	0	0	0	0	0	0	0	0	0	0	0
G10293.5	14	-	3034	9	full-splice_match	ENSMUSG00000060373	ENSMUST00000111610	2847	9	coding	313	942	179	1120	52321812	52312537	FALSE	TRUE	TRUE	Full	4	105	3.50463	0.00356777	F	0	2	0	0	0	0	0	2	0	0	0	0	0	0	0	0	0	0	0	0	0	0	0	0
G10293.50	14	-	1643	9	novel_not_in_catalog	ENSMUSG00000060373	novel	2617	9	coding	255	768	179	946	52321812	52312601	FALSE	TRUE	TRUE	Full	2	105	3.48838	0.00355122	F	0	0	0	0	0	0	0	2	0	0	0	0	0	0	0	0	0	0	0	0	0	0	0	0
G10293.52	14	-	2213	9	novel_in_catalog	ENSMUSG00000060373	novel	2617	9	coding	300	903	682	1584	52321812	52312537	FALSE	TRUE	TRUE	Full	4	105	3.39361	0.00345474	F	0	0	0	0	0	0	0	0	0	0	0	0	0	0	0	2	0	0	0	0	0	0	0	0
G10293.53	14	-	668	2	novel_not_in_catalog	ENSMUSG00000060373	novel	1691	9	non_coding	NA	NA	NA	NA	NA	NA	NA	TRUE	TRUE	Full	1	105	5.47954	0.00557825	F	0	0	0	0	0	0	0	0	0	0	0	0	0	0	0	0	0	0	0	0	0	0	0	0
G10293.58	14	-	1240	6	novel_not_in_catalog	ENSMUSG00000060373	novel	1691	9	coding	165	498	179	676	52321812	52312473	FALSE	TRUE	TRUE	Full	1	105	3.01633	0.00307066	F	0	0	0	0	0	0	0	0	0	0	0	0	0	0	0	0	0	0	0	0	0	0	0	0
G10293.6	14	-	2995	9	full-splice_match	ENSMUSG00000060373	ENSMUST00000227242	2617	9	coding	300	903	179	1081	52321812	52312537	FALSE	TRUE	TRUE	Full	6	105	3.47858	0.00354124	F	2	0	0	2	0	0	0	0	0	0	0	0	0	0	0	0	0	0	0	0	2	0	0	0
G10293.66	14	-	1908	10	novel_not_in_catalog	ENSMUSG00000060373	novel	2498	9	coding	306	921	360	1280	52321812	52312537	FALSE	TRUE	TRUE	Full	2	105	4.09251	0.00416623	F	0	0	0	0	3	0	0	0	0	0	0	0	0	0	0	0	0	0	0	0	0	0	0	0
G10293.67	14	-	2230	9	novel_in_catalog	ENSMUSG00000060373	novel	2498	9	coding	306	921	682	1602	52321812	52312537	FALSE	TRUE	TRUE	Full	1	105	3.15622	0.00321308	F	0	0	0	0	0	0	0	0	0	0	0	0	0	0	0	0	0	0	0	0	0	0	0	0
G10293.68	14	-	1701	8	novel_in_catalog	ENSMUSG00000060373	novel	2498	9	coding	306	921	153	1073	52321812	52312537	FALSE	TRUE	TRUE	Full	41	105	12.2678	0.0124888	F	4	6	9	4	5	3	2	5	9	2	3	3	4	4	10	2	0	0	4	3	8	5	4	5
G10293.69	14	-	1249	6	incomplete-splice_match	ENSMUSG00000060373	ENSMUST00000228748	1691	9	coding	190	573	49	621	52319292	52312537	FALSE	TRUE	TRUE	Full	2	105	3.77175	0.00383969	F	0	0	0	0	0	0	0	0	0	0	0	0	0	0	0	0	0	0	0	0	0	0	0	0
G10293.7	14	-	1903	2	incomplete-splice_match	ENSMUSG00000060373	ENSMUST00000111610	2847	9	non_coding	NA	NA	NA	NA	NA	NA	NA	TRUE	TRUE	Full	2	105	2.97734	0.00303097	F	0	2	0	0	0	0	0	0	0	0	0	0	0	0	0	0	0	0	0	2	0	0	0	0
G10293.70	14	-	1916	10	novel_in_catalog	ENSMUSG00000060373	novel	1691	9	coding	293	882	407	1288	52321812	52312537	FALSE	TRUE	TRUE	Full	6	105	3.87091	0.00394064	F	0	0	0	0	0	2	0	0	0	0	2	0	0	3	0	0	0	0	0	0	0	0	0	0
G10293.71	14	-	2191	9	novel_in_catalog	ENSMUSG00000060373	novel	1691	9	coding	293	882	682	1563	52321812	52312537	FALSE	TRUE	TRUE	Full	10	105	4.02679	0.00409932	F	0	0	0	0	2	0	2	0	0	0	0	0	0	2	0	0	2	0	0	0	0	0	0	0
G10293.72	14	-	1662	8	novel_in_catalog	ENSMUSG00000060373	novel	1691	9	coding	293	882	153	1034	52321812	52312537	FALSE	TRUE	TRUE	Full	48	105	13.7672	0.0140152	F	4	3	3	5	8	2	7	3	6	8	9	3	2	10	7	8	6	7	9	5	5	6	3	2
G10293.73	14	-	3404	8	novel_in_catalog	ENSMUSG00000060373	novel	2535	9	coding	171	516	2261	2776	52315019	52312537	FALSE	TRUE	TRUE	Full	1	105	5.04153	0.00513234	F	0	0	0	0	0	0	0	0	0	0	0	0	0	0	0	0	0	0	0	0	0	0	0	0
G10293.74	14	-	1149	4	incomplete-splice_match	ENSMUSG00000060373	ENSMUST00000228748	1691	9	coding	171	516	6	521	52315019	52312537	FALSE	TRUE	TRUE	Full	4	105	4.44666	0.00452676	F	0	0	0	0	0	0	0	0	0	0	0	0	0	0	0	0	0	0	5	0	0	2	0	0
G10293.79	14	-	2945	9	novel_in_catalog	ENSMUSG00000060373	novel	2535	9	coding	313	942	1376	2317	52321812	52312537	FALSE	TRUE	TRUE	Full	1	105	2.75893	0.00280862	F	0	0	0	0	0	0	0	0	0	0	0	0	0	0	0	0	0	0	0	0	0	0	0	0
G10293.8	14	-	2802	9	full-splice_match	ENSMUSG00000060373	ENSMUST00000228198	2498	9	coding	306	921	179	1099	52321812	52312537	FALSE	TRUE	TRUE	Full	13	105	4.20756	0.00428336	F	2	0	0	0	3	4	0	0	0	2	0	0	0	0	0	0	0	0	0	0	2	2	0	0
G10293.80	14	-	1976	10	novel_in_catalog	ENSMUSG00000060373	novel	2847	9	coding	313	942	407	1348	52321812	52312537	FALSE	TRUE	TRUE	Full	1	105	4.19992	0.00427557	F	0	0	0	0	0	0	0	0	0	0	0	0	0	0	0	0	0	0	0	0	0	0	0	0
G10293.81	14	-	2251	9	novel_in_catalog	ENSMUSG00000060373	novel	2847	9	coding	313	942	682	1623	52321812	52312537	FALSE	TRUE	TRUE	Full	2	105	2.92546	0.00297816	F	0	0	0	0	0	0	0	0	0	0	0	0	0	0	0	0	0	0	0	0	0	0	0	0
G10293.82	14	-	2930	9	novel_in_catalog	ENSMUSG00000060373	novel	2535	9	coding	300	903	1400	2302	52321812	52312537	FALSE	TRUE	TRUE	Full	2	105	3.40397	0.00346529	F	2	0	0	0	0	0	0	0	0	0	0	0	0	0	0	0	0	0	0	0	0	0	0	0
G10293.83	14	-	2923	9	novel_in_catalog	ENSMUSG00000060373	novel	2535	9	coding	300	903	1393	2295	52321812	52312537	FALSE	TRUE	TRUE	Full	3	105	4.39029	0.00446938	F	0	0	0	0	0	0	0	0	0	0	0	3	0	0	0	0	0	0	0	0	0	0	0	0
G10293.84	14	-	1937	10	novel_in_catalog	ENSMUSG00000060373	novel	2617	9	coding	300	903	407	1309	52321812	52312537	FALSE	TRUE	TRUE	Full	1	105	3.78186	0.00384999	F	0	0	0	0	0	0	0	0	0	0	0	0	0	0	0	2	0	0	0	0	0	0	0	0
G10293.85	14	-	1890	10	novel_not_in_catalog	ENSMUSG00000060373	novel	2617	9	coding	300	903	360	1262	52321812	52312537	FALSE	TRUE	TRUE	Full	7	105	3.55964	0.00362376	F	0	0	0	2	2	0	2	0	0	0	0	2	0	0	0	0	0	0	0	0	0	0	0	0
G10293.86	14	-	1683	8	full-splice_match	ENSMUSG00000060373	ENSMUST00000227536	1301	8	coding	300	903	153	1055	52321812	52312537	FALSE	TRUE	TRUE	Full	43	105	10.1479	0.0103307	F	4	5	4	5	8	3	6	0	3	6	2	5	5	10	8	2	2	5	4	8	0	0	4	2
G10293.87	14	-	1292	6	incomplete-splice_match	ENSMUSG00000060373	ENSMUST00000227536	1301	8	coding	197	594	71	664	52319292	52312537	FALSE	TRUE	TRUE	Full	3	105	4.59012	0.0046728	F	0	0	0	0	0	0	0	0	0	0	0	0	0	0	0	0	0	0	3	0	0	0	0	0
G10293.89	14	-	894	2	incomplete-splice_match	ENSMUSG00000060373	ENSMUST00000227458	1683	9	non_coding	NA	NA	NA	NA	NA	NA	NA	TRUE	TRUE	Full	5	105	3.77033	0.00383824	F	0	0	0	0	0	0	0	0	0	0	0	0	0	0	0	2	0	0	3	0	0	0	0	0
G10293.9	14	-	2775	8	novel_in_catalog	ENSMUSG00000060373	novel	2847	9	coding	306	921	152	1072	52321812	52312537	FALSE	TRUE	TRUE	Full	1	105	3.01633	0.00307066	F	0	0	0	0	0	0	0	0	0	0	0	0	0	0	0	0	0	0	0	0	0	0	0	0
G10293.91	14	-	1694	9	novel_not_in_catalog	ENSMUSG00000060373	novel	2847	9	coding	268	807	196	1002	52321812	52312601	FALSE	TRUE	TRUE	Full	1	105	6.03265	0.00614132	F	0	0	0	0	0	0	0	0	0	0	0	0	0	0	0	0	0	0	0	0	0	0	0	0
G10293.95	14	-	1726	9	full-splice_match	ENSMUSG00000060373	ENSMUST00000228198	2498	9	coding	306	921	179	1099	52321812	52312537	FALSE	TRUE	TRUE	Full	42	105	33.976	0.034588	F	8	17	16	21	15	12	29	4	19	16	11	29	22	32	27	0	22	15	24	26	13	0	7	10
G10293.96	14	-	2901	9	full-splice_match	ENSMUSG00000060373	ENSMUST00000228232	2535	9	coding	293	882	1393	2274	52321812	52312537	FALSE	TRUE	TRUE	Full	2	105	2.93129	0.00298409	F	0	0	0	0	0	0	0	0	0	0	0	0	0	2	0	0	0	0	0	0	0	2	0	0
G10293.97	14	-	1850	10	novel_not_in_catalog	ENSMUSG00000060373	novel	1683	9	coding	293	882	342	1223	52321812	52312537	FALSE	TRUE	TRUE	Full	6	105	3.64848	0.0037142	F	0	0	0	0	0	2	0	0	2	0	0	0	0	0	0	0	0	0	0	0	0	0	0	0
G10293.98	14	-	1687	9	full-splice_match	ENSMUSG00000060373	ENSMUST00000228748	1691	9	coding	293	882	179	1060	52321812	52312537	FALSE	TRUE	TRUE	Full	48	105	68.3363	0.0695673	F	20	31	31	31	29	39	41	52	36	35	29	38	27	63	45	27	24	46	44	24	31	33	27	20
G10296.1	14	+	1096	5	incomplete-splice_match	ENSMUSG00000057132	ENSMUST00000180500	602	6	coding	169	510	511	1020	52393622	52397675	FALSE	TRUE	TRUE	Full	1	1	2.75893	1	T	0	0	0	0	0	0	0	0	0	0	0	0	0	0	0	0	0	0	0	0	0	0	0	0
G10297.10	14	-	3620	27	novel_not_in_catalog	ENSMUSG00000035726	novel	4673	26	coding	1047	3144	91	3234	52434607	52398283	FALSE	TRUE	TRUE	Full	1	10	3.15622	0.0457526	F	0	0	0	0	0	0	0	0	0	0	0	0	0	0	0	0	0	0	0	0	0	0	0	0
G10297.12	14	-	4386	26	novel_not_in_catalog	ENSMUSG00000035726	novel	4673	26	coding	1018	3057	93	3149	52434607	52399134	FALSE	TRUE	TRUE	Full	1	10	3.1627	0.0458465	F	0	0	2	0	0	0	0	0	0	0	0	0	0	0	0	0	0	0	0	0	0	0	0	0
G10297.13	14	-	3562	26	full-splice_match	ENSMUSG00000035726	ENSMUST00000046709	4673	26	coding	1047	3144	91	3234	52434607	52399134	FALSE	TRUE	FALSE	Full	1	10	3.51337	0.0509298	F	0	0	0	0	0	0	0	0	2	0	0	0	0	0	0	0	0	0	0	0	0	0	0	0
G10297.14	14	-	3324	26	full-splice_match	ENSMUSG00000035726	ENSMUST00000046709	4673	26	coding	1047	3144	91	3234	52434607	52399134	FALSE	TRUE	FALSE	Full	12	10	3.5242	0.0510868	F	0	0	0	3	2	0	0	0	2	0	3	0	0	0	0	2	0	2	0	0	0	0	0	0
G10297.15	14	-	3237	26	full-splice_match	ENSMUSG00000035726	ENSMUST00000046709	4673	26	coding	1047	3144	91	3234	52434607	52399134	FALSE	TRUE	TRUE	Full	1	10	3.59279	0.0520811	F	0	0	0	0	0	0	0	0	0	0	2	0	0	0	0	0	0	0	0	0	0	0	0	0
G10297.16	14	-	2009	16	incomplete-splice_match	ENSMUSG00000035726	ENSMUST00000046709	4673	26	coding	639	1917	93	2009	52434607	52411465	FALSE	TRUE	TRUE	Full	27	10	5.6468	0.0818561	F	0	7	3	0	0	0	0	0	2	4	0	2	3	2	0	0	2	5	0	0	0	2	0	0
G10297.17	14	-	768	6	incomplete-splice_match	ENSMUSG00000035726	ENSMUST00000046709	4673	26	coding	225	675	93	767	52434607	52418581	FALSE	TRUE	FALSE	Full	4	10	3.78758	0.0549048	F	2	0	0	0	0	0	0	0	0	0	0	0	0	0	0	0	0	0	0	3	0	0	0	0
G10297.4	14	-	1592	3	incomplete-splice_match	ENSMUSG00000035726	ENSMUST00000046709	4673	26	coding	32	99	236	334	52399232	52399134	FALSE	TRUE	TRUE	Full	1	10	2.79612	0.0405326	F	0	0	0	0	0	0	0	0	0	0	0	0	0	2	0	0	0	0	0	0	0	0	0	0
G10297.5	14	-	1742	4	incomplete-splice_match	ENSMUSG00000035726	ENSMUST00000046709	4673	26	coding	142	429	56	484	52401953	52399134	FALSE	TRUE	TRUE	Full	3	10	3.24498	0.0470392	F	0	0	0	0	2	0	0	0	0	0	0	0	0	0	0	0	0	2	2	0	0	0	0	0
G10297.9	14	-	4472	26	full-splice_match	ENSMUSG00000035726	ENSMUST00000046709	4673	26	coding	1047	3144	91	3234	52434607	52399134	FALSE	TRUE	TRUE	Full	40	10	36.5598	0.52997	T	16	23	16	29	45	74	12	6	77	51	61	65	12	39	16	6	13	11	2	8	3	10	14	0
G10305.1	14	-	2620	7	novel_in_catalog	ENSMUSG00000022159	novel	2906	8	coding	185	558	114	671	52516698	52501167	FALSE	TRUE	TRUE	Full	1	6	3.33721	0.0327434	F	0	0	0	0	0	0	0	0	0	0	0	0	0	0	0	0	0	0	0	0	0	0	2	0
G10305.10	14	-	2523	6	novel_in_catalog	ENSMUSG00000022159	novel	2906	8	coding	139	420	166	585	52512947	52501167	FALSE	TRUE	TRUE	Full	1	6	3.46801	0.0340267	F	0	0	0	0	0	0	0	0	0	0	0	0	0	0	0	0	0	0	0	0	0	0	0	0
G10305.13	14	-	1900	6	incomplete-splice_match	ENSMUSG00000022159	ENSMUST00000167116	1573	9	coding	169	510	65	574	52516698	52503611	FALSE	TRUE	TRUE	Full	18	6	4.00592	0.0393045	F	0	0	0	0	0	2	3	2	0	4	2	0	0	0	2	0	2	0	0	0	2	2	2	0
G10305.5	14	-	1628	9	full-splice_match	ENSMUSG00000022159	ENSMUST00000167116	1573	9	coding	216	651	114	764	52516698	52501167	FALSE	TRUE	TRUE	Full	11	6	4.25292	0.041728	F	0	2	2	0	2	4	0	0	0	0	0	0	0	0	0	2	2	0	3	0	0	0	0	3
G10305.7	14	-	2658	8	full-splice_match	ENSMUSG00000022159	ENSMUST00000022765	2906	8	coding	216	651	65	715	52516698	52501167	FALSE	TRUE	TRUE	Full	48	6	82.2653	0.807155	T	30	45	57	65	79	76	41	28	80	57	56	66	38	75	47	17	72	50	30	51	75	80	86	24
G10305.9	14	-	1616	9	novel_not_in_catalog	ENSMUSG00000022159	novel	1573	9	coding	216	651	65	715	52516698	52501167	TRUE	TRUE	TRUE	Full	2	6	4.59078	0.0450429	F	0	0	0	0	0	0	0	2	0	0	0	0	0	0	0	3	0	0	0	0	0	0	0	0
G10307.1	14	+	3456	10	full-splice_match	ENSMUSG00000016831	ENSMUST00000022766	5350	10	coding	619	1860	349	2208	52517108	52530718	FALSE	TRUE	TRUE	Full	1	14	6.63362	0.0822467	F	4	0	0	0	0	0	0	0	0	0	0	0	0	0	0	0	0	0	0	0	0	0	0	0
G10307.10	14	+	4880	9	incomplete-splice_match	ENSMUSG00000016831	ENSMUST00000022766	5350	10	coding	619	1860	65	1924	52517108	52530718	FALSE	TRUE	TRUE	Full	1	14	3.09713	0.0383996	F	0	2	0	0	0	0	0	0	0	0	0	0	0	0	0	0	0	0	0	0	0	0	0	0
G10307.11	14	+	1509	5	incomplete-splice_match	ENSMUSG00000016831	ENSMUST00000022766	5350	10	coding	278	837	65	901	52517108	52525015	FALSE	TRUE	TRUE	Full	2	14	2.9892	0.0370616	F	0	0	0	0	0	0	0	0	0	0	0	0	0	0	0	0	0	0	0	0	0	0	0	0
G10307.12	14	+	2409	5	incomplete-splice_match	ENSMUSG00000016831	ENSMUST00000022766	5350	10	coding	278	837	65	901	52517108	52525015	FALSE	TRUE	TRUE	Full	5	14	3.55618	0.0440912	F	0	0	0	0	0	2	0	0	0	2	0	0	0	0	0	0	0	0	0	0	0	0	0	0
G10307.13	14	+	3443	9	novel_in_catalog	ENSMUSG00000016831	novel	5350	10	coding	489	1470	719	2188	52524258	52530718	FALSE	TRUE	TRUE	Full	2	14	3.37878	0.0418917	F	0	0	0	0	0	0	0	0	0	0	0	0	0	0	0	0	2	0	0	0	0	0	2	0
G10307.19	14	+	2094	8	incomplete-splice_match	ENSMUSG00000016831	ENSMUST00000022766	5350	10	coding	536	1611	246	1856	52523291	52530718	FALSE	TRUE	TRUE	Full	1	14	3.59279	0.0445451	F	0	0	0	0	0	0	0	0	0	0	2	0	0	0	0	0	0	0	0	0	0	0	0	0
G10307.2	14	+	3055	9	incomplete-splice_match	ENSMUSG00000016831	ENSMUST00000022766	5350	10	coding	619	1860	70	1929	52517108	52530718	FALSE	TRUE	FALSE	Full	2	14	3.17586	0.0393758	F	0	0	0	0	0	0	0	0	0	0	2	0	0	0	0	0	0	0	0	0	0	0	0	0
G10307.20	14	+	2501	8	incomplete-splice_match	ENSMUSG00000016831	ENSMUST00000022766	5350	10	coding	536	1611	245	1855	52523291	52530718	FALSE	TRUE	TRUE	Full	1	14	3.38255	0.0419384	F	0	0	0	0	0	2	0	0	0	0	0	0	0	0	0	0	0	0	0	0	0	0	0	0
G10307.25	14	+	1419	2	incomplete-splice_match	ENSMUSG00000016831	ENSMUST00000022766	5350	10	coding	139	420	986	1405	52531530	52531949	FALSE	TRUE	TRUE	Full	1	14	3.07509	0.0381264	F	0	0	0	0	0	0	0	0	0	0	0	0	0	0	0	0	0	0	0	0	2	0	0	0
G10307.5	14	+	1986	9	incomplete-splice_match	ENSMUSG00000016831	ENSMUST00000022766	5350	10	coding	619	1860	65	1924	52517108	52530718	FALSE	TRUE	FALSE	Full	1	14	2.75893	0.0342065	F	0	0	0	0	0	0	0	0	0	0	0	0	0	0	0	0	0	0	0	0	0	0	0	0
G10307.6	14	+	2158	9	incomplete-splice_match	ENSMUSG00000016831	ENSMUST00000022766	5350	10	coding	619	1860	65	1924	52517108	52530718	FALSE	TRUE	TRUE	Full	26	14	5.06332	0.0627774	F	0	3	0	3	5	3	0	0	0	0	0	2	0	0	4	0	2	2	0	2	3	3	4	2
G10307.7	14	+	2197	9	incomplete-splice_match	ENSMUSG00000016831	ENSMUST00000022766	5350	10	coding	619	1860	65	1924	52517108	52530718	FALSE	TRUE	FALSE	Full	1	14	3.62379	0.0449294	F	0	0	0	0	0	0	0	0	0	0	0	0	0	0	0	0	0	0	0	0	0	0	0	0
G10307.8	14	+	2573	9	incomplete-splice_match	ENSMUSG00000016831	ENSMUST00000022766	5350	10	coding	619	1860	65	1924	52517108	52530718	FALSE	TRUE	TRUE	Full	2	14	4.09382	0.0507571	F	0	0	0	0	0	0	0	0	0	0	0	0	2	0	0	0	0	0	0	0	0	0	0	0
G10307.9	14	+	3172	9	incomplete-splice_match	ENSMUSG00000016831	ENSMUST00000022766	5350	10	coding	619	1860	65	1924	52517108	52530718	FALSE	TRUE	TRUE	Full	48	14	32.2341	0.399653	T	26	28	33	22	19	31	24	8	19	17	27	17	9	15	23	3	23	23	6	28	23	20	32	11
G10308.10	14	-	1815	10	novel_in_catalog	ENSMUSG00000022160	novel	2025	11	coding	258	777	914	1690	52535475	52532439	FALSE	TRUE	TRUE	Full	25	17	4.50709	0.0440354	F	2	0	0	2	2	0	2	0	3	0	0	0	0	4	3	0	2	3	0	3	0	0	0	0
G10308.11	14	-	1834	10	novel_not_in_catalog	ENSMUSG00000022160	novel	2025	11	coding	245	738	124	861	52542444	52535528	TRUE	TRUE	TRUE	Full	1	17	3.01633	0.0294703	F	0	0	0	0	0	0	0	0	0	0	0	0	0	0	0	0	0	0	0	0	0	0	0	0
G10308.12	14	-	1933	9	novel_in_catalog	ENSMUSG00000022160	novel	2025	11	coding	245	738	160	897	52542444	52535528	TRUE	TRUE	TRUE	Full	1	17	3.15622	0.0308371	F	0	0	0	0	0	0	0	0	0	0	0	0	0	0	0	0	0	0	0	0	0	0	0	0
G10308.13	14	-	2998	10	novel_in_catalog	ENSMUSG00000022160	novel	2025	11	coding	544	1635	151	1785	52542444	52533527	FALSE	TRUE	TRUE	Full	2	17	3.19281	0.0311946	F	0	0	0	0	0	0	0	0	0	0	0	0	0	0	0	0	0	0	0	0	0	0	0	0
G10308.14	14	-	3396	8	novel_in_catalog	ENSMUSG00000022160	novel	2025	11	coding	497	1494	138	1631	52542444	52534079	FALSE	TRUE	TRUE	Full	1	17	4.19419	0.0409783	F	0	0	0	0	0	0	0	0	0	0	0	0	0	3	0	0	0	0	0	0	0	0	0	0
G10308.16	14	-	2749	7	novel_in_catalog	ENSMUSG00000022160	novel	2025	11	coding	245	738	136	873	52542444	52535528	TRUE	TRUE	TRUE	Full	1	17	3.32437	0.03248	F	0	0	0	0	0	0	0	0	0	0	0	0	0	0	0	0	0	0	0	0	0	0	0	0
G10308.17	14	-	2257	11	novel_not_in_catalog	ENSMUSG00000022160	novel	2159	9	coding	544	1635	131	1765	52542444	52533527	TRUE	TRUE	TRUE	Partial	1	17	2.85755	0.027919	F	0	0	0	0	0	0	0	0	0	0	0	0	0	0	0	0	0	0	0	2	0	0	0	0
G10308.18	14	-	2154	9	full-splice_match	ENSMUSG00000022160	ENSMUST00000147768	2159	9	coding	245	738	124	861	52542444	52535528	TRUE	TRUE	TRUE	Full	9	17	4.1797	0.0408368	F	2	0	0	2	0	0	4	2	0	0	0	0	0	0	0	0	0	0	0	0	0	3	2	0
G10308.19	14	-	2329	10	incomplete-splice_match	ENSMUSG00000022160	ENSMUST00000022767	2025	11	coding	544	1635	131	1765	52542444	52533527	FALSE	TRUE	TRUE	Full	27	17	4.93364	0.0482029	F	3	4	2	3	2	3	2	2	6	2	6	3	0	7	4	0	4	0	0	2	0	0	3	0
G10308.20	14	-	2018	10	incomplete-splice_match	ENSMUSG00000022160	ENSMUST00000022767	2025	11	coding	544	1635	135	1769	52542444	52533527	FALSE	TRUE	TRUE	Full	2	17	2.96081	0.0289279	F	0	0	2	0	0	0	0	0	0	0	0	0	0	0	0	0	0	0	0	0	0	0	0	0
G10308.3	14	-	2253	8	novel_in_catalog	ENSMUSG00000022160	novel	2025	11	coding	245	738	138	875	52542444	52535528	TRUE	TRUE	TRUE	Full	2	17	4.36563	0.0426533	F	0	0	0	0	0	0	0	0	0	0	0	0	0	0	0	0	0	0	0	0	0	0	0	0
G10308.4	14	-	2819	9	full-splice_match	ENSMUSG00000022160	ENSMUST00000147768	2159	9	coding	245	738	136	873	52542444	52535528	TRUE	TRUE	TRUE	Full	1	17	4.19992	0.0410343	F	0	0	0	0	0	0	0	0	0	0	0	0	0	0	0	0	0	0	0	0	0	0	0	0
G10308.5	14	-	1974	10	novel_in_catalog	ENSMUSG00000022160	novel	2025	11	coding	567	1704	135	1838	52542444	52532439	FALSE	TRUE	TRUE	Full	1	17	3.17608	0.0310311	F	0	0	0	0	0	0	0	0	0	0	0	0	0	0	0	0	0	0	2	0	0	0	0	0
G10308.6	14	-	2098	10	novel_in_catalog	ENSMUSG00000022160	novel	2025	11	coding	497	1494	138	1631	52542444	52534079	TRUE	TRUE	TRUE	Full	2	17	3.10539	0.0303405	F	0	0	0	0	0	0	0	0	0	0	0	0	0	0	0	0	0	0	0	0	0	0	0	0
G10308.7	14	-	2425	9	novel_in_catalog	ENSMUSG00000022160	novel	2025	11	coding	497	1494	136	1629	52542444	52534079	TRUE	TRUE	TRUE	Full	4	17	3.58596	0.0350357	F	0	0	0	0	0	0	0	0	0	0	0	0	0	0	0	0	0	0	0	0	0	0	0	0
G10308.8	14	-	2196	11	novel_not_in_catalog	ENSMUSG00000022160	novel	2025	11	coding	305	918	135	1052	52542444	52536078	TRUE	TRUE	TRUE	Partial	1	17	3.19754	0.0312408	F	0	0	0	0	0	0	0	0	0	0	0	0	0	0	0	0	0	2	0	0	0	0	0	0
G10308.9	14	-	1991	11	full-splice_match	ENSMUSG00000022160	ENSMUST00000022767	2025	11	coding	580	1743	124	1866	52542444	52532439	FALSE	TRUE	TRUE	Full	48	17	44.3982	0.433782	T	26	25	20	24	35	17	35	10	27	29	20	19	13	32	24	10	38	18	18	29	32	28	29	21
G1031.3	1	+	889	4	full-splice_match	ENSMUSG00000073633	ENSMUST00000097672	901	4	coding	188	567	24	590	84817594	84877906	FALSE	TRUE	TRUE	Full	11	1	4.93116	1	T	0	0	0	0	0	3	2	0	0	0	0	0	0	0	0	0	2	0	6	3	2	0	0	0
G10314.19	14	+	1157	2	full-splice_match	ENSMUSG00000094231	ENSMUST00000103626	595	2	coding	146	441	177	617	53532053	53532588	FALSE	TRUE	TRUE	Full	1	6	3.1627	0.123804	F	0	0	2	0	0	0	0	0	0	0	0	0	0	0	0	0	0	0	0	0	0	0	0	0
G10314.21	14	+	1253	2	fusion	ENSMUSG00000094966_ENSMUSG00000096678	novel	563	2	coding	146	441	274	714	53828537	53914188	FALSE	TRUE	TRUE	Full	4	6	5.61346	0.219739	F	0	0	0	0	0	0	0	0	0	0	0	0	0	0	0	0	0	0	0	0	2	0	0	0
G10314.25	14	+	850	2	full-splice_match	ENSMUSG00000096678	ENSMUST00000103662	395	2	coding	146	441	271	711	53913653	53914188	FALSE	TRUE	TRUE	Full	1	6	3.78186	0.148041	F	0	0	0	0	0	0	0	0	0	0	0	0	0	0	0	2	0	0	0	0	0	0	0	0
G10314.26	14	+	3083	2	fusion	ENSMUSG00000096096_ENSMUSG00000096678	novel	395	2	coding	184	555	744	1298	53914130	53921560	FALSE	TRUE	TRUE	Full	1	6	2.88641	0.112989	F	0	0	0	0	0	0	0	0	0	0	0	0	0	0	0	0	0	0	0	0	0	0	0	0
G10314.3	14	+	1201	2	full-splice_match	ENSMUSG00000094914	ENSMUST00000199746	340	2	coding	223	672	131	802	53129508	53130272	FALSE	TRUE	TRUE	Full	2	6	4.03614	0.157995	F	0	0	0	0	0	0	0	0	0	0	0	0	0	0	0	0	0	0	0	0	0	2	3	0
G10314.9	14	+	1207	2	full-splice_match	ENSMUSG00000090868	ENSMUST00000200548	565	2	coding	136	411	256	666	53220913	53221418	FALSE	TRUE	TRUE	Full	8	6	6.06542	0.237431	T	0	0	0	0	0	0	0	0	0	0	0	0	0	0	0	0	0	0	0	0	0	2	0	0
G10316.1	14	+	850	2	full-splice_match	ENSMUSG00000094828	ENSMUST00000181768	419	2	coding	155	468	122	589	53903462	53904088	FALSE	TRUE	TRUE	Full	4	2	4.07052	0.521145	T	0	0	0	0	0	0	0	3	0	0	0	0	0	0	0	0	0	0	0	0	0	0	0	2
G10316.2	14	+	2300	2	full-splice_match	ENSMUSG00000094828	ENSMUST00000181768	419	2	coding	155	468	122	589	53903462	53904088	FALSE	TRUE	TRUE	Full	9	2	3.7402	0.478855	F	0	2	3	2	0	0	2	3	0	0	0	0	0	0	0	0	0	2	0	0	0	0	2	0
G10318.10	14	-	398	2	incomplete-splice_match	ENSMUSG00000022174	ENSMUST00000022781	878	3	non_coding	NA	NA	NA	NA	NA	NA	NA	TRUE	TRUE	Full	9	3	4.69922	0.0233348	F	6	2	3	0	0	0	0	0	0	0	0	2	3	2	2	0	0	0	3	0	2	0	0	0
G10318.5	14	-	821	4	novel_not_in_catalog	ENSMUSG00000022174	novel	878	3	coding	113	342	40	381	54491299	54480195	TRUE	TRUE	TRUE	Full	3	3	4.95446	0.0246022	F	0	0	0	0	0	0	0	0	0	0	0	0	0	2	0	0	0	0	4	4	0	0	0	0
G10318.9	14	-	647	3	full-splice_match	ENSMUSG00000022174	ENSMUST00000022781	878	3	coding	113	342	40	381	54491299	54480195	FALSE	TRUE	TRUE	Full	48	3	191.729	0.952063	T	122	60	77	144	126	85	131	126	51	80	34	82	69	144	137	218	71	55	204	113	138	83	82	58
G10320.1	14	+	2470	4	novel_not_in_catalog	ENSMUSG00000076867	novel	444	2	coding	139	420	773	1192	54312461	54313047	FALSE	TRUE	TRUE	Full	1	1	3.1627	1	T	0	0	2	0	0	0	0	0	0	0	0	0	0	0	0	0	0	0	0	0	0	0	0	0
G10324.1	14	+	1097	5	novel_not_in_catalog	ENSMUSG00000076928	novel	935	4	coding	100	303	277	579	54458088	54460554	FALSE	TRUE	TRUE	Full	6	15	4.35682	0.0603609	F	0	0	0	0	0	0	0	0	0	0	0	0	0	0	0	0	0	0	0	0	0	0	0	0
G10324.10	14	+	1220	5	novel_not_in_catalog	ENSMUSG00000076928	novel	935	4	coding	100	303	399	701	54458088	54460554	FALSE	TRUE	TRUE	Full	1	15	3.62138	0.0501719	F	0	0	0	0	0	0	0	0	0	0	0	0	0	0	0	0	0	0	0	0	0	0	0	0
G10324.11	14	+	1240	5	novel_not_in_catalog	ENSMUSG00000076928	novel	935	4	coding	100	303	709	1011	54458088	54460554	FALSE	TRUE	FALSE	Full	1	15	3.4856	0.0482907	F	0	0	0	0	0	0	0	0	0	2	0	0	0	0	0	0	0	0	0	0	0	0	0	0
G10324.12	14	+	1522	5	novel_not_in_catalog	ENSMUSG00000076928	novel	935	4	coding	100	303	709	1011	54458088	54460554	FALSE	TRUE	TRUE	Full	14	15	8.11457	0.112422	F	0	0	6	0	0	0	0	0	8	6	2	3	4	0	4	10	0	4	0	2	5	0	0	5
G10324.13	14	+	1626	6	novel_not_in_catalog	ENSMUSG00000076928	novel	935	4	coding	100	303	813	1115	54458088	54460554	FALSE	TRUE	TRUE	Full	1	15	3.20782	0.0444422	F	0	0	0	0	0	0	0	0	0	0	0	0	0	0	2	0	0	0	0	0	0	0	0	0
G10324.15	14	+	1028	5	novel_not_in_catalog	ENSMUSG00000076928	novel	935	4	coding	100	303	180	482	54458088	54460554	FALSE	TRUE	TRUE	Full	1	15	3.33721	0.0462348	F	0	0	0	0	0	0	0	0	0	0	0	0	0	0	0	0	0	0	0	0	0	0	2	0
G10324.17	14	+	925	4	full-splice_match	ENSMUSG00000076928	ENSMUST00000198398	935	4	coding	100	303	112	414	54458088	54460554	FALSE	TRUE	TRUE	Full	1	15	7.30606	0.101221	F	0	0	0	0	0	0	0	0	0	0	0	0	0	0	0	0	0	0	0	0	0	0	0	0
G10324.2	14	+	1463	6	novel_not_in_catalog	ENSMUSG00000076928	novel	935	4	coding	100	303	643	945	54458088	54460554	FALSE	TRUE	TRUE	Full	3	15	3.53158	0.0489277	F	0	0	0	0	0	0	0	0	0	0	0	0	0	0	0	0	0	0	0	0	0	0	0	0
G10324.3	14	+	1364	5	novel_not_in_catalog	ENSMUSG00000076928	novel	935	4	coding	100	303	551	853	54458088	54460554	FALSE	TRUE	TRUE	Full	7	15	3.54202	0.0490723	F	2	0	0	0	0	0	0	0	0	0	0	0	0	0	0	0	0	0	0	0	0	0	0	0
G10324.4	14	+	1443	5	novel_not_in_catalog	ENSMUSG00000076928	novel	935	4	coding	100	303	630	932	54458088	54460554	FALSE	TRUE	TRUE	Full	1	15	5.51785	0.0764462	F	0	0	0	0	0	0	0	0	0	0	0	0	0	0	0	0	0	0	0	0	0	0	0	0
G10324.5	14	+	1080	5	novel_not_in_catalog	ENSMUSG00000076928	novel	935	4	coding	100	303	267	569	54458088	54460554	FALSE	TRUE	TRUE	Full	5	15	3.86046	0.0534841	F	0	0	0	0	0	3	2	0	0	0	2	0	0	0	0	0	0	0	0	0	0	0	0	0
G10324.6	14	+	1009	6	novel_not_in_catalog	ENSMUSG00000076928	novel	935	4	coding	100	303	196	498	54458088	54460554	FALSE	TRUE	TRUE	Full	2	15	3.9499	0.0547233	F	0	0	0	0	0	0	0	0	0	0	0	2	0	0	0	0	0	0	0	3	0	0	0	0
G10324.7	14	+	992	5	novel_not_in_catalog	ENSMUSG00000076928	novel	935	4	coding	144	435	47	481	54431453	54460554	FALSE	TRUE	TRUE	Full	3	15	6.12019	0.0847912	F	0	0	0	0	0	0	0	0	0	0	0	0	0	0	4	4	0	0	0	0	0	0	0	2
G10324.8	14	+	1122	5	novel_not_in_catalog	ENSMUSG00000076928	novel	935	4	coding	100	303	309	611	54458088	54460554	FALSE	TRUE	TRUE	Full	4	15	3.38767	0.0469339	F	0	0	0	0	0	2	0	0	0	0	2	0	0	2	0	0	0	0	0	0	0	0	0	0
G10324.9	14	+	1212	5	novel_not_in_catalog	ENSMUSG00000076928	novel	935	4	coding	100	303	399	701	54458088	54460554	FALSE	TRUE	TRUE	Full	6	15	8.84043	0.122478	T	0	0	0	0	0	0	0	0	3	3	0	0	0	3	8	0	0	5	0	0	0	0	0	8
G10325.1	14	+	2205	8	novel_not_in_catalog	ENSMUSG00000040997	novel	2508	7	coding	318	957	355	1311	54499132	54505314	TRUE	TRUE	TRUE	Full	1	13	3.49114	0.0203285	F	0	0	0	0	0	0	0	0	0	0	0	0	0	0	0	0	0	0	0	0	0	0	0	0
G10325.11	14	+	2805	7	full-splice_match	ENSMUSG00000040997	ENSMUST00000239403	2406	7	coding	342	1029	28	1056	54496754	54505314	FALSE	TRUE	TRUE	Full	1	13	3.07509	0.0179058	F	0	0	0	0	0	0	0	0	0	0	0	0	0	0	0	0	0	0	0	0	2	0	0	0
G10325.12	14	+	2347	7	full-splice_match	ENSMUSG00000040997	ENSMUST00000041197	2401	7	coding	342	1029	14	1042	54496754	54505314	FALSE	TRUE	TRUE	Full	48	13	109.127	0.635434	T	117	132	85	98	37	54	30	40	102	49	94	63	44	76	54	10	120	121	18	101	91	88	118	84
G10325.13	14	+	2258	6	novel_in_catalog	ENSMUSG00000040997	novel	2401	7	coding	310	933	21	953	54496761	54505314	FALSE	TRUE	TRUE	Full	1	13	2.75893	0.0160649	F	0	0	0	0	0	0	0	0	0	0	0	0	0	0	0	0	0	0	0	0	0	0	0	0
G10325.14	14	+	2452	7	novel_in_catalog	ENSMUSG00000040997	novel	2401	7	coding	318	957	189	1145	54499132	54505314	FALSE	TRUE	TRUE	Full	33	13	10.5299	0.0613141	F	11	11	6	12	0	4	3	2	10	4	11	7	2	6	2	0	15	14	0	7	9	13	14	6
G10325.16	14	+	2203	5	incomplete-splice_match	ENSMUSG00000040997	ENSMUST00000041197	2401	7	coding	270	813	84	896	54500212	54505314	FALSE	TRUE	TRUE	Full	13	13	3.72686	0.0217011	F	0	0	0	2	0	2	0	0	0	0	0	2	2	0	0	0	2	3	0	4	2	2	0	0
G10325.17	14	+	1807	4	incomplete-splice_match	ENSMUSG00000040997	ENSMUST00000041197	2401	7	coding	84	255	245	499	54504474	54505314	FALSE	TRUE	TRUE	Full	1	13	3.77923	0.0220059	F	0	0	0	0	0	0	0	0	0	0	0	0	0	0	0	0	0	0	0	0	0	0	0	0
G10325.18	14	+	1697	3	incomplete-splice_match	ENSMUSG00000040997	ENSMUST00000041197	2401	7	coding	84	255	136	390	54504474	54505314	FALSE	TRUE	TRUE	Full	5	13	3.85175	0.0224283	F	0	0	0	0	0	0	0	0	2	0	0	0	0	0	0	0	2	0	3	0	0	0	0	0
G10325.19	14	+	1556	2	incomplete-splice_match	ENSMUSG00000040997	ENSMUST00000197807	564	4	non_coding	NA	NA	NA	NA	NA	NA	NA	TRUE	TRUE	Full	4	13	3.38786	0.0197271	F	0	0	0	0	0	0	0	0	0	0	0	0	0	0	2	0	0	0	0	2	0	3	0	0
G10325.5	14	+	2586	7	full-splice_match	ENSMUSG00000040997	ENSMUST00000180359	2508	7	coding	318	957	325	1281	54499132	54505314	FALSE	TRUE	TRUE	Full	46	13	16.8419	0.0980684	F	11	15	14	14	0	10	2	2	24	6	21	13	6	10	5	0	9	10	2	11	12	12	17	5
G10325.6	14	+	2286	7	full-splice_match	ENSMUSG00000040997	ENSMUST00000041197	2401	7	coding	355	1068	4	1071	54496715	54505314	FALSE	TRUE	TRUE	Full	1	13	2.79612	0.0162815	F	0	0	0	0	0	0	0	0	0	0	0	0	0	2	0	0	0	0	0	0	0	0	0	0
G10325.7	14	+	1960	8	novel_not_in_catalog	ENSMUSG00000040997	novel	2401	7	coding	342	1029	38	1066	54496754	54505314	TRUE	TRUE	TRUE	Full	1	13	4.13839	0.0240973	F	0	0	0	0	0	0	0	0	0	0	0	0	0	0	0	0	0	0	0	0	0	0	0	0
G10325.8	14	+	3187	7	novel_not_in_catalog	ENSMUSG00000040997	novel	2401	7	coding	290	873	33	905	54496754	54502151	TRUE	TRUE	TRUE	Full	2	13	4.23213	0.0246432	F	0	0	0	0	0	0	0	0	0	0	3	0	0	0	0	0	0	0	0	0	2	0	0	0
G10326.10	14	+	1679	9	novel_not_in_catalog	ENSMUSG00000000959	novel	2538	10	coding	202	609	869	1477	54604762	54605908	FALSE	TRUE	TRUE	Full	1	26	3.14305	0.0110075	F	0	0	0	0	0	0	0	0	0	0	0	0	0	0	0	0	0	0	0	0	0	0	0	0
G10326.13	14	+	1449	10	novel_not_in_catalog	ENSMUSG00000000959	novel	2538	10	coding	266	801	447	1247	54604243	54605908	FALSE	TRUE	TRUE	Full	15	26	5.34003	0.0187017	F	0	2	0	0	2	0	0	6	0	0	0	3	2	2	4	0	4	0	2	2	5	6	0	3
G10326.14	14	+	2239	10	novel_not_in_catalog	ENSMUSG00000000959	novel	2538	10	coding	266	801	447	1247	54604243	54605908	FALSE	TRUE	TRUE	Full	1	26	3.09713	0.0108467	F	0	2	0	0	0	0	0	0	0	0	0	0	0	0	0	0	0	0	0	0	0	0	0	0
G10326.15	14	+	1292	10	full-splice_match	ENSMUSG00000000959	ENSMUST00000000985	2538	10	coding	423	1269	22	1290	54598312	54605875	FALSE	TRUE	FALSE	Full	1	26	2.97518	0.0104196	F	0	0	0	0	0	0	0	0	0	0	0	0	0	0	0	0	0	0	0	0	0	0	0	0
G10326.16	14	+	1442	10	full-splice_match	ENSMUSG00000000959	ENSMUST00000000985	2538	10	coding	433	1302	22	1323	54598312	54605908	FALSE	TRUE	FALSE	Full	18	26	5.14587	0.0180217	F	0	0	2	0	0	0	0	2	0	0	0	0	0	0	2	0	3	0	3	3	0	2	2	0
G10326.17	14	+	1509	10	full-splice_match	ENSMUSG00000000959	ENSMUST00000000985	2538	10	coding	433	1302	22	1323	54598312	54605908	FALSE	TRUE	TRUE	Full	48	26	163.892	0.573978	T	110	113	105	85	110	88	114	99	69	76	69	71	67	119	100	110	150	156	128	182	167	148	141	135
G10326.18	14	+	1806	10	full-splice_match	ENSMUSG00000000959	ENSMUST00000000985	2538	10	coding	433	1302	22	1323	54598312	54605908	FALSE	TRUE	FALSE	Full	1	26	4.19992	0.0147088	F	0	0	0	0	0	0	0	0	0	0	0	0	0	0	0	0	0	0	0	0	0	0	0	0
G10326.19	14	+	2318	10	full-splice_match	ENSMUSG00000000959	ENSMUST00000000985	2538	10	coding	433	1302	22	1323	54598312	54605908	FALSE	TRUE	TRUE	Full	45	26	12.2598	0.042936	F	10	13	13	15	4	3	12	0	14	7	5	5	3	15	7	4	12	11	2	5	7	11	10	8
G10326.2	14	+	1748	8	novel_in_catalog	ENSMUSG00000000959	novel	2538	10	coding	328	987	26	1012	54598312	54605055	TRUE	TRUE	TRUE	Full	1	26	3.3374	0.0116882	F	0	0	0	0	0	0	0	0	0	0	0	0	0	0	0	0	0	0	0	0	0	0	0	0
G10326.20	14	+	2541	10	full-splice_match	ENSMUSG00000000959	ENSMUST00000000985	2538	10	coding	433	1302	22	1323	54598312	54605908	FALSE	TRUE	TRUE	Full	27	26	5.46857	0.0191519	F	8	3	0	2	0	2	2	0	4	0	5	2	0	0	4	0	2	3	0	5	6	4	2	3
G10326.21	14	+	1295	9	novel_in_catalog	ENSMUSG00000000959	novel	2538	10	coding	266	801	309	1109	54604243	54605908	FALSE	TRUE	TRUE	Full	1	26	3.33721	0.0116875	F	0	0	0	0	0	0	0	0	0	0	0	0	0	0	0	0	0	0	0	0	0	0	2	0
G10326.23	14	+	2013	8	novel_in_catalog	ENSMUSG00000000959	novel	2538	10	coding	241	726	927	1652	54604243	54605749	FALSE	TRUE	TRUE	Full	3	26	4.68032	0.0163913	F	0	0	0	0	0	0	0	0	0	0	0	0	0	0	0	0	0	0	0	0	0	0	2	0
G10326.27	14	+	2406	9	incomplete-splice_match	ENSMUSG00000000959	ENSMUST00000000985	2538	10	coding	408	1227	21	1247	54598312	54605749	FALSE	TRUE	TRUE	Full	1	26	3.4856	0.0122072	F	0	0	0	0	0	0	0	0	0	2	0	0	0	0	0	0	0	0	0	0	0	0	0	0
G10326.29	14	+	1933	7	novel_in_catalog	ENSMUSG00000000959	novel	2538	10	coding	122	369	1360	1728	54605259	54605908	FALSE	TRUE	TRUE	Full	1	26	3.36102	0.0117708	F	0	0	0	0	0	0	0	0	0	0	0	0	0	0	0	0	0	0	0	0	0	0	0	0
G10326.30	14	+	1926	9	novel_in_catalog	ENSMUSG00000000959	novel	2538	10	coding	266	801	920	1720	54604243	54605908	FALSE	TRUE	TRUE	Full	48	26	19.604	0.0686567	F	2	4	8	2	11	6	3	5	10	11	12	5	4	8	9	2	10	5	12	4	19	27	23	6
G10326.31	14	+	1987	9	novel_not_in_catalog	ENSMUSG00000000959	novel	2538	10	coding	266	801	985	1785	54604243	54605908	FALSE	TRUE	TRUE	Full	1	26	3.15622	0.0110536	F	0	0	0	0	0	0	0	0	0	0	0	0	0	0	0	0	0	0	0	0	0	0	0	0
G10326.33	14	+	2780	9	incomplete-splice_match	ENSMUSG00000000959	ENSMUST00000000985	2538	10	coding	266	801	762	1562	54604243	54605908	FALSE	TRUE	TRUE	Full	3	26	3.20464	0.0112232	F	0	0	0	0	0	0	0	0	0	0	0	0	0	0	0	0	0	2	0	0	0	0	0	0
G10326.34	14	+	2522	9	incomplete-splice_match	ENSMUSG00000000959	ENSMUST00000000985	2538	10	coding	266	801	722	1522	54604243	54605908	FALSE	TRUE	TRUE	Full	10	26	4.3898	0.0153738	F	2	0	0	2	0	0	0	0	0	0	0	0	2	0	2	0	0	0	0	0	0	2	0	0
G10326.35	14	+	1643	9	novel_not_in_catalog	ENSMUSG00000000959	novel	2538	10	coding	266	801	643	1443	54604243	54605908	FALSE	TRUE	TRUE	Full	1	26	4.43767	0.0155415	F	0	0	0	0	0	0	0	0	0	0	0	0	0	0	0	0	0	0	0	0	0	0	0	0
G10326.36	14	+	1621	9	incomplete-splice_match	ENSMUSG00000000959	ENSMUST00000000985	2538	10	coding	266	801	704	1504	54604243	54605908	FALSE	TRUE	FALSE	Full	1	26	3.65303	0.0127935	F	0	0	0	0	0	0	0	0	0	0	0	0	0	0	0	0	0	0	0	0	0	0	0	0
G10326.40	14	+	854	5	incomplete-splice_match	ENSMUSG00000000959	ENSMUST00000000985	2538	10	coding	202	609	40	648	54604762	54605908	FALSE	TRUE	TRUE	Full	2	26	3.34242	0.0117057	F	0	0	0	0	0	0	0	2	0	0	0	0	0	0	0	0	0	0	2	0	0	0	0	0
G10326.41	14	+	403	2	incomplete-splice_match	ENSMUSG00000000959	ENSMUST00000000985	2538	10	coding	64	195	126	320	54605817	54606011	FALSE	TRUE	TRUE	Full	1	26	3.78186	0.0132447	F	0	0	0	0	0	0	0	0	0	0	0	0	0	0	0	2	0	0	0	0	0	0	0	0
G10326.5	14	+	1617	9	incomplete-splice_match	ENSMUSG00000000959	ENSMUST00000000985	2538	10	coding	408	1227	25	1251	54598312	54605749	FALSE	TRUE	TRUE	Full	24	26	4.53881	0.0158957	F	2	3	3	0	0	2	0	4	2	2	2	0	0	0	0	4	2	3	3	3	6	2	2	3
G10326.7	14	+	1840	8	novel_in_catalog	ENSMUSG00000000959	novel	2538	10	coding	146	441	1198	1638	54605087	54605908	FALSE	TRUE	TRUE	Full	5	26	4.90277	0.0171703	F	0	0	0	0	0	0	0	0	0	0	0	0	0	0	0	0	0	0	0	0	0	0	0	0
G10326.8	14	+	1475	3	full-splice_match	ENSMUSG00000000959	ENSMUST00000198107	1438	3	coding	157	474	25	498	54598312	54601002	FALSE	TRUE	TRUE	Full	7	26	3.82777	0.0134055	F	0	0	0	0	0	0	0	0	0	0	0	0	0	0	0	0	0	0	0	0	0	0	0	0
G10326.9	14	+	2090	8	novel_in_catalog	ENSMUSG00000000959	novel	2538	10	coding	202	609	1277	1885	54604762	54605908	FALSE	TRUE	TRUE	Full	1	26	2.97518	0.0104196	F	0	0	0	0	0	0	0	0	0	0	0	0	0	0	0	0	0	0	0	0	0	0	0	0
G10327.1	14	-	2074	10	full-splice_match	ENSMUSG00000000958	ENSMUST00000000984	2132	10	coding	510	1533	200	1732	54646461	54607243	FALSE	TRUE	TRUE	Full	13	5	4.36986	0.235443	T	0	0	0	2	2	0	0	0	0	4	5	0	2	2	2	0	0	0	0	0	2	0	2	0
G10327.2	14	-	2249	10	novel_not_in_catalog	ENSMUSG00000000958	novel	2278	12	coding	531	1596	312	1907	54647163	54607243	FALSE	TRUE	TRUE	Full	1	5	4.19992	0.226286	F	0	0	0	0	0	0	0	0	0	0	0	0	0	0	0	0	0	0	0	0	0	0	0	0
G10327.3	14	-	2013	10	full-splice_match	ENSMUSG00000000958	ENSMUST00000195970	2057	10	coding	510	1533	139	1671	54646461	54607243	FALSE	TRUE	TRUE	Full	1	5	2.75893	0.148647	F	0	0	0	0	0	0	0	0	0	0	0	0	0	0	0	0	0	0	0	0	0	0	0	0
G10327.4	14	-	1991	10	novel_in_catalog	ENSMUSG00000000958	novel	2278	12	coding	533	1602	48	1649	54648021	54607243	FALSE	TRUE	TRUE	Full	1	5	3.15622	0.170053	F	0	0	0	0	0	0	0	0	0	0	0	0	0	0	0	0	0	0	0	0	0	0	0	0
G10327.5	14	-	2098	10	incomplete-splice_match	ENSMUSG00000000958	ENSMUST00000197440	2278	12	coding	510	1533	225	1757	54646461	54607243	FALSE	TRUE	TRUE	Full	4	5	4.07527	0.21957	F	0	0	0	0	0	0	0	0	0	0	0	0	0	0	0	0	0	0	0	0	0	0	0	0
G10328.10	14	+	1424	3	incomplete-splice_match	ENSMUSG00000010406	ENSMUST00000199195	463	4	non_coding	NA	NA	NA	NA	NA	NA	NA	TRUE	TRUE	Full	1	10	5.51536	0.0450793	F	0	0	0	0	0	0	3	0	0	0	0	0	0	0	0	0	0	0	0	0	0	0	0	0
G10328.13	14	+	1791	5	full-splice_match	ENSMUSG00000010406	ENSMUST00000010550	418	5	coding	121	366	18	383	54664390	54667185	FALSE	TRUE	TRUE	Full	1	10	2.95845	0.0241806	F	0	0	0	0	0	0	0	0	0	0	0	0	0	0	0	0	0	0	0	0	0	0	0	0
G10328.14	14	+	475	4	full-splice_match	ENSMUSG00000010406	ENSMUST00000199195	463	4	non_coding	NA	NA	NA	NA	NA	NA	NA	TRUE	TRUE	Full	13	10	7.23806	0.0591595	F	9	0	0	0	0	0	3	0	0	0	2	0	5	4	0	0	2	2	0	0	3	0	0	0
G10328.15	14	+	387	3	full-splice_match	ENSMUSG00000010406	ENSMUST00000199689	429	3	non_coding	NA	NA	NA	NA	NA	NA	NA	TRUE	TRUE	Full	10	10	4.35947	0.0356317	F	2	0	0	2	0	0	0	0	0	0	0	0	0	0	5	0	0	0	0	0	0	0	0	0
G10328.2	14	+	408	5	full-splice_match	ENSMUSG00000010406	ENSMUST00000010550	418	5	coding	121	366	24	389	54664390	54667185	FALSE	TRUE	TRUE	Full	48	10	66.2225	0.541263	T	46	26	39	35	25	31	36	48	19	21	16	19	17	46	44	99	33	17	100	31	56	39	15	15
G10328.3	14	+	1339	4	incomplete-splice_match	ENSMUSG00000010406	ENSMUST00000010550	418	5	coding	91	276	24	299	54664390	54666162	FALSE	TRUE	TRUE	Full	22	10	7.27016	0.0594219	F	2	0	3	3	0	0	2	0	0	0	0	0	2	0	3	2	0	3	0	2	6	2	0	3
G10328.4	14	+	1761	4	novel_in_catalog	ENSMUSG00000010406	novel	418	5	non_coding	NA	NA	NA	NA	NA	NA	NA	TRUE	TRUE	Full	1	10	2.97518	0.0243173	F	0	0	0	0	0	0	0	0	0	0	0	0	0	0	0	0	0	0	0	0	0	0	0	0
G10328.6	14	+	489	4	novel_in_catalog	ENSMUSG00000010406	novel	418	5	non_coding	NA	NA	NA	NA	NA	NA	NA	TRUE	TRUE	Full	44	10	18.1836	0.148622	F	0	7	5	16	7	7	8	14	7	8	0	8	0	7	7	22	6	4	27	13	10	13	7	4
G10328.7	14	+	1428	3	novel_in_catalog	ENSMUSG00000010406	novel	418	5	non_coding	NA	NA	NA	NA	NA	NA	NA	TRUE	TRUE	Full	3	10	3.76114	0.0307413	F	0	0	0	0	0	0	0	0	0	0	0	0	0	0	2	0	0	0	0	0	0	0	0	0
G10328.9	14	+	2771	2	incomplete-splice_match	ENSMUSG00000010406	ENSMUST00000010550	418	5	non_coding	NA	NA	NA	NA	NA	NA	NA	TRUE	TRUE	Full	3	10	3.86422	0.0315838	F	0	0	0	0	0	0	0	0	0	0	0	0	0	0	0	0	0	0	0	0	0	0	0	0
G10331.3	14	+	2354	4	incomplete-splice_match	ENSMUSG00000022175	ENSMUST00000022782	4228	7	coding	588	1767	148	1914	54705074	54707306	FALSE	TRUE	TRUE	Full	2	1	3.29153	1	T	0	0	2	0	0	0	0	0	0	0	0	0	0	0	0	0	2	0	0	0	0	0	0	0
G10332.1	14	+	1451	4	novel_in_catalog	ENSMUSG00000022176	novel	1884	5	coding	218	657	100	756	54713753	54717202	FALSE	TRUE	TRUE	Full	1	3	4.46277	0.134805	F	0	0	0	0	0	0	0	0	0	0	0	0	0	0	0	0	0	0	0	0	0	0	0	0
G10332.2	14	+	1764	5	full-splice_match	ENSMUSG00000022176	ENSMUST00000164766	1884	5	coding	341	1026	53	1078	54713729	54717202	FALSE	TRUE	TRUE	Full	48	3	24.5099	0.74036	T	10	21	14	20	7	13	14	17	12	18	18	14	20	15	20	7	20	14	6	21	24	30	21	13
G10332.3	14	+	1976	4	novel_in_catalog	ENSMUSG00000022176	novel	1884	5	coding	158	477	53	529	54713729	54715301	TRUE	TRUE	TRUE	Full	7	3	4.1327	0.124835	F	0	0	0	0	0	0	0	0	2	4	0	0	0	0	0	0	0	0	0	3	0	3	0	0
G10334.2	14	-	1284	6	incomplete-splice_match	ENSMUSG00000023110	ENSMUST00000023873	2691	17	coding	218	657	30	686	54748453	54745252	FALSE	TRUE	TRUE	Full	1	3	3.62379	0.151896	F	0	0	0	0	0	0	0	0	0	0	0	0	0	0	0	0	0	0	0	0	0	0	0	0
G10334.4	14	-	2517	17	full-splice_match	ENSMUSG00000023110	ENSMUST00000023873	2691	17	coding	634	1905	15	1919	54754804	54745252	FALSE	TRUE	TRUE	Full	46	3	15.1909	0.636749	T	15	15	13	13	15	15	6	3	13	0	7	6	4	9	5	3	18	18	7	16	8	9	12	8
G10334.5	14	-	2430	16	novel_in_catalog	ENSMUSG00000023110	novel	2691	17	coding	531	1596	237	1832	54752891	54745252	FALSE	TRUE	TRUE	Full	24	3	5.04228	0.211354	F	5	3	0	2	3	0	0	3	0	3	0	3	0	2	2	0	0	2	0	3	5	5	3	0
G10335.1	14	-	1546	10	full-splice_match	ENSMUSG00000022177	ENSMUST00000022784	1587	10	coding	363	1092	167	1258	54789648	54779531	FALSE	TRUE	TRUE	Full	43	2	10.5347	0.780744	T	3	2	2	3	4	7	5	7	6	12	7	7	0	6	12	7	2	13	7	10	9	14	8	4
G10335.3	14	-	1698	11	novel_in_catalog	ENSMUSG00000022177	novel	1587	10	coding	213	642	771	1412	54786337	54779531	FALSE	TRUE	TRUE	Full	1	2	2.95845	0.219256	F	0	0	0	0	0	0	0	0	0	0	0	0	0	0	0	0	0	0	0	0	0	0	0	0
G10338.2	14	-	2700	8	novel_not_in_catalog	ENSMUSG00000022179	novel	2670	7	coding	541	1626	455	2080	54833173	54821738	FALSE	TRUE	TRUE	Full	1	4	2.95845	0.164307	F	0	0	0	0	0	0	0	0	0	0	0	0	0	0	0	0	0	0	0	0	0	0	0	0
G10338.4	14	-	1746	6	incomplete-splice_match	ENSMUSG00000022179	ENSMUST00000022786	2670	7	coding	340	1023	106	1128	54828896	54821738	FALSE	TRUE	TRUE	Full	25	4	5.88279	0.32672	F	2	4	3	9	4	0	2	0	0	0	0	0	0	9	0	0	5	2	4	2	2	4	2	0
G10338.5	14	-	2596	7	full-splice_match	ENSMUSG00000022179	ENSMUST00000022786	2670	7	coding	541	1626	353	1978	54833173	54821738	FALSE	TRUE	TRUE	Full	24	4	5.95655	0.330817	T	2	9	7	5	0	0	0	0	4	0	3	3	3	0	0	0	5	3	0	2	2	3	3	4
G10338.6	14	-	1995	7	full-splice_match	ENSMUSG00000022179	ENSMUST00000022786	2670	7	coding	541	1626	363	1988	54833173	54821738	FALSE	TRUE	TRUE	Full	1	4	3.20782	0.178157	F	0	0	0	0	0	0	0	0	0	0	0	0	0	0	2	0	0	0	0	0	0	0	0	0
G10339.10	14	-	979	4	novel_not_in_catalog	ENSMUSG00000022193	novel	899	3	coding	176	531	24	554	54855448	54853571	TRUE	TRUE	TRUE	Full	5	6	4.51402	0.0073917	F	0	0	0	0	0	0	0	0	0	0	0	0	0	0	0	0	0	0	0	0	0	0	0	0
G10339.12	14	-	794	4	novel_not_in_catalog	ENSMUSG00000022193	novel	899	3	coding	232	699	24	722	54855448	54851649	FALSE	TRUE	TRUE	Full	1	6	3.62379	0.00593394	F	0	0	0	0	0	0	0	0	0	0	0	0	0	0	0	0	0	0	0	0	0	0	0	0
G10339.18	14	-	874	3	full-splice_match	ENSMUSG00000022193	ENSMUST00000022803	899	3	coding	264	795	8	802	54855448	54851649	FALSE	TRUE	TRUE	Full	47	6	591.891	0.969221	T	232	211	296	0	378	297	373	483	160	307	182	274	233	463	428	572	218	272	550	372	313	320	176	226
G10339.19	14	-	790	3	novel_not_in_catalog	ENSMUSG00000022193	novel	899	3	coding	138	417	27	443	54855448	54851924	FALSE	TRUE	TRUE	Full	1	6	3.77923	0.00618848	F	0	0	0	0	0	0	0	0	0	0	0	0	0	0	0	0	0	0	0	0	0	0	0	0
G10339.20	14	-	629	3	full-splice_match	ENSMUSG00000022193	ENSMUST00000227257	622	3	coding	177	534	24	557	54855448	54851649	FALSE	TRUE	TRUE	Full	5	6	3.4113	0.005586	F	0	0	0	0	0	0	0	2	0	0	0	0	2	0	0	0	0	0	0	0	0	0	0	0
G10339.26	14	-	581	2	novel_in_catalog	ENSMUSG00000022193	novel	899	3	non_coding	NA	NA	NA	NA	NA	NA	NA	TRUE	TRUE	Full	1	6	3.46801	0.00567886	F	0	0	0	0	0	0	0	0	0	0	0	0	0	0	0	0	0	0	0	0	0	0	0	0
G1034.1	1	-	3841	5	full-splice_match	ENSMUSG00000026220	ENSMUST00000027422	3207	5	coding	512	1539	403	1941	84907272	84884999	FALSE	TRUE	TRUE	Full	1	1	4.13839	1	T	0	0	0	0	0	0	0	0	0	0	0	0	0	0	0	0	0	0	0	0	0	0	0	0
G10342.1	14	-	2268	12	novel_in_catalog	ENSMUSG00000022185	novel	2373	13	coding	553	1662	39	1700	54889293	54880185	FALSE	TRUE	TRUE	Full	1	20	4.81173	0.046207	F	0	0	0	0	0	0	0	0	0	0	0	0	0	0	3	0	0	0	0	0	0	0	0	0
G10342.10	14	-	2537	13	novel_in_catalog	ENSMUSG00000022185	novel	2494	13	coding	580	1743	229	1971	54890693	54880185	FALSE	TRUE	TRUE	Full	33	20	7.07039	0.0678969	F	4	10	4	5	3	2	0	0	5	0	5	5	3	8	0	0	3	2	0	2	0	2	3	0
G10342.11	14	-	2754	12	full-splice_match	ENSMUSG00000022185	ENSMUST00000167015	1746	12	coding	580	1743	446	2188	54890693	54880185	FALSE	TRUE	TRUE	Full	8	20	4.39538	0.0422088	F	0	0	0	0	0	2	0	0	4	2	0	2	0	0	0	0	0	0	0	0	0	0	2	0
G10342.12	14	-	2433	12	full-splice_match	ENSMUSG00000022185	ENSMUST00000126166	2369	12	coding	565	1698	170	1867	54889293	54880185	FALSE	TRUE	TRUE	Full	37	20	8.24731	0.0791989	F	2	0	3	12	0	4	2	2	8	4	9	7	5	5	3	0	5	5	0	2	6	0	4	3
G10342.13	14	-	2302	12	novel_in_catalog	ENSMUSG00000022185	novel	2373	13	coding	565	1698	39	1736	54889293	54880185	FALSE	TRUE	TRUE	Full	11	20	4.63683	0.0445275	F	0	0	0	0	0	0	0	0	0	0	2	0	0	0	0	0	0	5	2	0	0	0	5	2
G10342.15	14	-	4311	18	full-splice_match	ENSMUSG00000022185	ENSMUST00000111484	4048	18	coding	1240	3723	23	3745	54924063	54880185	FALSE	TRUE	TRUE	Full	15	20	5.15688	0.0495215	F	0	3	4	4	0	0	0	0	0	0	8	2	0	0	0	0	0	3	0	3	0	0	0	0
G10342.16	14	-	2287	11	incomplete-splice_match	ENSMUSG00000022185	ENSMUST00000126166	2369	12	coding	565	1698	24	1721	54889293	54880185	FALSE	TRUE	TRUE	Full	1	20	3.4856	0.0334722	F	0	0	0	0	0	0	0	0	0	2	0	0	0	0	0	0	0	0	0	0	0	0	0	0
G10342.18	14	-	2485	13	incomplete-splice_match	ENSMUSG00000022185	ENSMUST00000022793	4735	19	coding	565	1698	223	1920	54889293	54880185	FALSE	TRUE	TRUE	Full	1	20	3.19754	0.030706	F	0	0	0	0	0	0	0	0	0	0	0	0	0	0	0	0	0	2	0	0	0	0	0	0
G10342.20	14	-	2498	13	novel_in_catalog	ENSMUSG00000022185	novel	2494	13	coding	568	1707	229	1935	54890693	54880185	FALSE	TRUE	TRUE	Full	1	20	5.47954	0.05262	F	0	0	0	0	0	0	0	0	0	0	0	0	0	0	0	0	0	0	0	0	0	0	0	0
G10342.21	14	-	4462	19	full-splice_match	ENSMUSG00000022185	ENSMUST00000022793	4735	19	coding	1280	3843	57	3899	54924063	54880185	FALSE	TRUE	TRUE	Full	5	20	3.3356	0.0320317	F	2	0	0	0	0	0	0	0	2	0	2	0	0	0	0	0	0	0	0	0	0	0	0	0
G10342.25	14	-	2404	13	novel_in_catalog	ENSMUSG00000022185	novel	2373	13	coding	580	1743	100	1842	54890693	54880185	FALSE	TRUE	TRUE	Full	1	20	3.06646	0.0294472	F	0	0	0	0	0	0	0	0	0	0	0	0	0	0	0	0	0	0	0	0	0	2	0	0
G10342.49	14	-	1061	7	incomplete-splice_match	ENSMUSG00000022185	ENSMUST00000167015	1746	12	coding	38	114	948	1061	54881539	54881426	FALSE	TRUE	FALSE	Full	1	20	4.76411	0.0457498	F	0	0	0	0	0	0	0	0	0	0	0	0	0	0	0	0	0	0	3	0	0	0	0	0
G10342.5	14	-	1201	3	full-splice_match	ENSMUSG00000022185	ENSMUST00000152773	844	3	coding	187	564	72	635	54881539	54880185	FALSE	FALSE	TRUE	Full	48	20	18.1039	0.173851	T	16	13	12	10	8	5	10	14	14	3	12	20	20	10	5	2	17	16	10	13	7	8	9	13
G10342.50	14	-	2278	9	incomplete-splice_match	ENSMUSG00000022185	ENSMUST00000147714	4383	19	coding	751	2253	25	2277	54924063	54889186	FALSE	TRUE	FALSE	Full	3	20	3.96408	0.038067	F	0	0	0	0	0	0	0	0	0	0	0	0	0	0	0	0	0	0	0	0	0	0	3	0
G10342.51	14	-	2161	8	incomplete-splice_match	ENSMUSG00000022185	ENSMUST00000111484	4048	18	coding	711	2133	28	2160	54924063	54889186	FALSE	TRUE	FALSE	Full	4	20	3.37391	0.0323997	F	0	0	0	0	0	0	0	0	0	0	0	0	0	0	0	0	0	0	0	0	0	2	0	0
G10342.54	14	-	643	6	incomplete-splice_match	ENSMUSG00000022185	ENSMUST00000147714	4383	19	coding	207	621	21	641	54924063	54902996	FALSE	TRUE	FALSE	Full	1	20	3.59279	0.0345015	F	0	0	0	0	0	0	0	0	0	0	2	0	0	0	0	0	0	0	0	0	0	0	0	0
G10342.6	14	-	1408	4	incomplete-splice_match	ENSMUSG00000022185	ENSMUST00000126166	2369	12	coding	187	564	279	842	54881539	54880185	FALSE	TRUE	TRUE	Full	1	20	4.59969	0.0441708	F	0	0	0	0	0	0	0	0	0	0	0	0	0	0	0	0	0	0	0	0	0	3	0	0
G10342.7	14	-	2462	13	novel_in_catalog	ENSMUSG00000022185	novel	2494	13	coding	622	1869	28	1896	54891111	54880185	FALSE	TRUE	TRUE	Full	3	20	3.2163	0.0308861	F	0	0	2	0	0	0	0	0	0	0	0	0	0	2	0	0	0	0	0	0	0	0	0	0
G10342.8	14	-	2397	12	novel_in_catalog	ENSMUSG00000022185	novel	4383	19	coding	553	1662	170	1831	54889293	54880185	FALSE	TRUE	TRUE	Full	6	20	4.76195	0.045729	F	0	3	2	3	0	0	0	0	4	0	0	0	0	3	0	0	0	0	0	0	0	0	0	0
G10342.9	14	-	2498	13	full-splice_match	ENSMUSG00000022185	ENSMUST00000150371	2494	13	coding	634	1905	28	1932	54891111	54880185	FALSE	TRUE	TRUE	Full	11	20	4.87418	0.0468068	F	0	0	3	5	0	3	0	0	0	2	5	0	0	0	2	0	0	3	0	0	0	0	0	0
G10344.1	14	+	1963	3	full-splice_match	ENSMUSG00000040822	ENSMUST00000227269	893	3	coding	142	429	1038	1466	54927262	54927690	FALSE	TRUE	TRUE	Full	1	4	3.42035	0.0503279	F	0	0	0	0	0	0	0	0	0	0	0	0	0	0	0	0	2	0	0	0	0	0	0	0
G10344.2	14	+	1486	3	full-splice_match	ENSMUSG00000040822	ENSMUST00000228027	811	3	coding	142	429	557	985	54927262	54927690	FALSE	TRUE	TRUE	Full	19	4	4.09648	0.0602767	F	0	0	0	0	0	0	0	0	2	0	0	0	0	6	3	2	4	2	2	2	0	2	0	0
G10344.3	14	+	1867	2	full-splice_match	ENSMUSG00000040822	ENSMUST00000038539	1843	2	coding	142	429	938	1366	54927262	54927690	FALSE	TRUE	TRUE	Full	48	4	57.2818	0.842859	T	39	26	30	38	38	35	33	40	22	38	25	38	30	46	35	44	42	42	38	48	41	30	27	34
G10344.4	14	+	1369	2	novel_in_catalog	ENSMUSG00000040822	novel	1843	2	coding	142	429	440	868	54927262	54927690	FALSE	TRUE	TRUE	Full	1	4	3.1627	0.0465368	F	0	0	2	0	0	0	0	0	0	0	0	0	0	0	0	0	0	0	0	0	0	0	0	0
G10345.3	14	-	2324	3	incomplete-splice_match	ENSMUSG00000022180	ENSMUST00000022787	4084	11	coding	77	234	213	446	54962270	54961551	FALSE	TRUE	TRUE	Full	1	3	3.19754	0.291566	F	0	0	0	0	0	0	0	0	0	0	0	0	0	0	0	0	0	2	0	0	0	0	0	0
G10345.4	14	-	4093	11	full-splice_match	ENSMUSG00000022180	ENSMUST00000022787	4084	11	coding	531	1596	620	2215	55018784	54961551	FALSE	TRUE	TRUE	Full	6	3	4.45244	0.405993	T	4	4	0	0	0	0	0	0	2	0	2	0	0	0	0	0	0	0	0	0	0	0	0	0
G10345.6	14	-	2103	2	incomplete-splice_match	ENSMUSG00000022180	ENSMUST00000022787	4084	11	non_coding	NA	NA	NA	NA	NA	NA	NA	TRUE	TRUE	Full	1	3	3.31681	0.302441	F	2	0	0	0	0	0	0	0	0	0	0	0	0	0	0	0	0	0	0	0	0	0	0	0
G10349.2	14	-	1857	3	novel_in_catalog	ENSMUSG00000057156	novel	4713	2	coding	513	1542	209	1750	55095706	55093116	FALSE	TRUE	TRUE	Full	11	2	4.3215	0.225534	F	0	0	0	0	0	0	0	2	0	2	0	0	0	0	0	0	0	0	0	6	2	0	2	2
G10349.4	14	-	2906	2	full-splice_match	ENSMUSG00000057156	ENSMUST00000142283	4713	2	coding	518	1557	209	1765	55095706	55094150	FALSE	TRUE	TRUE	Full	37	2	14.8397	0.774466	T	7	11	11	12	6	14	10	2	18	13	18	8	4	10	16	0	7	9	0	16	8	7	14	2
G1035.1	1	+	700	2	antisense	novelGene_ENSMUSG00000026220_AS	novel	NA	NA	non_coding	NA	NA	NA	NA	NA	NA	NA	TRUE	FALSE	Full	1	2	3.50876	0.48127	F	0	0	0	0	0	0	0	2	0	0	0	0	0	0	0	0	0	0	0	0	0	0	0	0
G1035.2	1	+	983	2	antisense	novelGene_ENSMUSG00000026220_AS	novel	NA	NA	coding	129	390	317	706	84912673	84913062	FALSE	TRUE	FALSE	Full	1	2	3.78186	0.51873	T	0	0	0	0	0	0	0	0	0	0	0	0	0	0	0	2	0	0	0	0	0	0	0	0
G10350.1	14	-	1002	2	full-splice_match	ENSMUSG00000072494	ENSMUST00000168622	1852	2	coding	230	693	2	694	55114613	55113831	FALSE	TRUE	TRUE	Full	1	1	2.95845	1	T	0	0	0	0	0	0	0	0	0	0	0	0	0	0	0	0	0	0	0	0	0	0	0	0
G10352.2	14	+	863	3	full-splice_match	ENSMUSG00000089682	ENSMUST00000133397	3813	3	coding	178	537	197	733	55121839	55122375	FALSE	TRUE	TRUE	Full	5	2	4.94202	0.426933	F	0	0	0	0	0	0	3	0	0	0	0	0	0	0	0	0	4	2	0	0	0	0	0	0
G10352.3	14	+	3461	4	full-splice_match	ENSMUSG00000089682	ENSMUST00000022806	3509	4	coding	193	582	181	762	55121839	55122990	FALSE	TRUE	TRUE	Full	1	2	6.63362	0.573067	T	4	0	0	0	0	0	0	0	0	0	0	0	0	0	0	0	0	0	0	0	0	0	0	0
G10355.11	14	-	740	2	incomplete-splice_match	ENSMUSG00000022199	ENSMUST00000226690	1406	6	coding	88	267	135	401	55144794	55144528	FALSE	TRUE	TRUE	Full	16	30	5.01055	0.00977003	F	0	0	0	0	0	0	2	0	0	0	0	0	0	3	0	3	0	0	6	3	5	4	0	0
G10355.13	14	-	2258	10	novel_in_catalog	ENSMUSG00000022199	novel	2340	10	coding	252	759	1161	1919	55145992	55144528	FALSE	TRUE	TRUE	Full	1	30	3.09713	0.00603906	F	0	2	0	0	0	0	0	0	0	0	0	0	0	0	0	0	0	0	0	0	0	0	0	0
G10355.14	14	-	2334	10	novel_not_in_catalog	ENSMUSG00000022199	novel	2348	10	coding	510	1533	463	1995	55149965	55144528	FALSE	TRUE	TRUE	Full	2	30	3.25874	0.00635419	F	0	2	0	0	0	0	0	0	0	0	0	0	0	0	0	0	2	0	0	0	0	0	0	0
G10355.17	14	-	1065	4	incomplete-splice_match	ENSMUSG00000022199	ENSMUST00000228588	1446	9	coding	149	450	277	726	55145391	55144528	FALSE	TRUE	TRUE	Full	21	30	6.54293	0.012758	F	0	0	3	0	0	0	0	0	0	0	0	0	0	0	9	3	0	6	11	0	0	0	4	0
G10355.19	14	-	1505	5	incomplete-splice_match	ENSMUSG00000022199	ENSMUST00000226718	2302	9	coding	241	726	441	1166	55145667	55144528	FALSE	TRUE	TRUE	Full	1	30	3.07509	0.00599609	F	0	0	0	0	0	0	0	0	0	0	0	0	0	0	0	0	0	0	0	0	2	0	0	0
G10355.21	14	-	1089	6	novel_not_in_catalog	ENSMUSG00000022199	novel	2294	9	coding	325	978	93	1070	55145992	55144209	FALSE	TRUE	TRUE	Partial	1	30	3.42035	0.00666932	F	0	0	0	0	0	0	0	0	0	0	0	0	0	0	0	0	2	0	0	0	0	0	0	0
G10355.24	14	-	2126	9	incomplete-splice_match	ENSMUSG00000022199	ENSMUST00000228119	2348	10	coding	520	1563	226	1788	55149965	55144528	FALSE	TRUE	TRUE	Full	39	30	9.83998	0.0191869	F	5	11	6	9	4	4	0	0	3	3	6	3	0	7	3	0	17	13	2	6	5	8	9	7
G10355.25	14	-	2270	9	full-splice_match	ENSMUSG00000022199	ENSMUST00000231305	2290	9	coding	401	1206	727	1932	55149712	55144528	FALSE	TRUE	TRUE	Full	3	30	5.28836	0.0103117	F	0	5	0	3	0	0	0	0	0	0	0	0	0	0	0	0	0	0	0	0	0	0	0	0
G10355.27	14	-	2049	9	novel_not_in_catalog	ENSMUSG00000022199	novel	2348	10	coding	241	726	986	1711	55145667	55144528	FALSE	TRUE	TRUE	Partial	28	30	7.42507	0.0144781	F	4	7	7	9	0	2	0	2	5	0	5	9	4	4	0	0	5	2	0	0	2	0	0	0
G10355.29	14	-	2775	8	novel_in_catalog	ENSMUSG00000022199	novel	2348	10	coding	315	948	463	1410	55149965	55145714	TRUE	TRUE	TRUE	Full	1	30	3.1627	0.00616692	F	0	0	2	0	0	0	0	0	0	0	0	0	0	0	0	0	0	0	0	0	0	0	0	0
G10355.30	14	-	2006	8	incomplete-splice_match	ENSMUSG00000022199	ENSMUST00000231305	2290	9	coding	346	1041	629	1669	55147131	55144528	FALSE	TRUE	TRUE	Full	10	30	3.60071	0.007021	F	2	0	3	0	0	0	0	0	0	0	0	2	0	0	0	0	2	2	0	0	0	0	0	0
G10355.32	14	-	2004	8	incomplete-splice_match	ENSMUSG00000022199	ENSMUST00000226718	2302	9	coding	161	486	411	896	55147191	55145714	TRUE	TRUE	TRUE	Full	2	30	3.08179	0.00600916	F	0	2	0	0	0	0	0	0	0	0	0	0	0	0	0	0	0	0	0	0	0	2	0	0
G10355.33	14	-	1943	8	novel_not_in_catalog	ENSMUSG00000022199	novel	2348	10	coding	241	726	882	1607	55145667	55144528	FALSE	TRUE	TRUE	Partial	1	30	4.38121	0.00854288	F	0	0	0	0	0	0	0	0	0	0	0	0	0	0	0	0	0	0	0	0	0	0	0	2
G10355.34	14	-	1667	6	incomplete-splice_match	ENSMUSG00000022199	ENSMUST00000226718	2302	9	coding	241	726	608	1333	55145667	55144528	FALSE	TRUE	TRUE	Full	2	30	3.25618	0.00634919	F	0	0	0	0	0	0	0	0	0	0	0	0	0	0	0	0	2	0	0	0	0	0	0	0
G10355.35	14	-	2387	10	novel_not_in_catalog	ENSMUSG00000022199	novel	2348	10	coding	315	948	463	1410	55149965	55145714	TRUE	TRUE	TRUE	Full	1	30	3.62138	0.00706131	F	0	0	0	0	0	0	0	0	0	0	0	0	0	0	0	0	0	0	0	0	0	0	0	0
G10355.38	14	-	1489	7	incomplete-splice_match	ENSMUSG00000022199	ENSMUST00000228119	2348	10	coding	366	1101	57	1157	55147191	55144528	FALSE	TRUE	TRUE	Full	40	30	7.94973	0.0155011	F	2	0	0	4	4	5	5	0	2	3	2	0	4	2	3	2	7	5	4	4	12	3	3	3
G10355.40	14	-	2514	9	full-splice_match	ENSMUSG00000022199	ENSMUST00000226718	2302	9	coding	315	948	463	1410	55149965	55145714	TRUE	TRUE	TRUE	Full	28	30	22.9323	0.0447154	F	41	37	36	11	0	0	0	3	26	0	29	2	2	6	0	0	10	5	0	0	0	3	6	0
G10355.41	14	-	1885	10	novel_not_in_catalog	ENSMUSG00000022199	novel	2348	10	coding	366	1101	454	1554	55147191	55144528	FALSE	TRUE	TRUE	Partial	47	30	71.2682	0.138965	F	48	105	59	85	11	40	6	36	99	22	105	70	75	75	22	0	57	48	3	41	42	44	37	32
G10355.42	14	-	1296	6	incomplete-splice_match	ENSMUSG00000022199	ENSMUST00000228588	1446	9	coding	302	909	58	966	55146317	55144528	FALSE	TRUE	TRUE	Full	39	30	9.52818	0.0185789	F	3	4	6	0	2	5	2	5	2	0	2	0	5	4	0	2	14	9	11	7	7	16	5	11
G10355.43	14	-	2355	10	full-splice_match	ENSMUSG00000022199	ENSMUST00000228495	2340	10	coding	520	1563	463	2025	55149965	55144528	FALSE	TRUE	TRUE	Full	45	30	289.682	0.564849	T	607	702	518	234	2	45	0	92	444	8	508	159	179	154	16	2	312	201	0	5	16	60	207	95
G10355.45	14	-	2047	8	novel_in_catalog	ENSMUSG00000022199	novel	2348	10	coding	412	1239	479	1717	55149965	55144528	FALSE	TRUE	TRUE	Full	1	30	3.31681	0.00646742	F	2	0	0	0	0	0	0	0	0	0	0	0	0	0	0	0	0	0	0	0	0	0	0	0
G10355.47	14	-	2086	11	novel_not_in_catalog	ENSMUSG00000022199	novel	2348	10	coding	500	1503	257	1759	55150171	55144528	FALSE	TRUE	TRUE	Full	16	30	4.33919	0.00846096	F	2	5	0	2	0	0	0	2	0	0	0	0	0	2	0	0	3	0	0	0	2	0	0	0
G10355.49	14	-	2280	11	novel_not_in_catalog	ENSMUSG00000022199	novel	2348	10	coding	554	1665	291	1955	55150171	55144528	FALSE	TRUE	TRUE	Full	1	30	4.74405	0.00925038	F	0	0	3	0	0	0	0	0	0	0	0	0	0	0	0	0	0	0	0	0	0	0	0	0
G10355.51	14	-	1554	8	novel_not_in_catalog	ENSMUSG00000022199	novel	2348	10	coding	258	777	454	1230	55147191	55144528	FALSE	TRUE	TRUE	Partial	1	30	3.51337	0.00685069	F	0	0	0	0	0	0	0	0	2	0	0	0	0	0	0	0	0	0	0	0	0	0	0	0
G10355.52	14	-	2218	10	novel_not_in_catalog	ENSMUSG00000022199	novel	2340	10	coding	474	1425	472	1896	55149965	55144528	FALSE	TRUE	TRUE	Full	2	30	4.45184	0.00868061	F	0	0	0	0	0	0	0	0	0	0	0	0	0	0	0	0	0	0	0	0	0	0	0	0
G10355.54	14	-	2138	9	novel_in_catalog	ENSMUSG00000022199	novel	2340	10	coding	344	1035	472	1506	55149965	55144997	FALSE	TRUE	TRUE	Full	1	30	3.51337	0.00685069	F	0	0	0	0	0	0	0	0	2	0	0	0	0	0	0	0	0	0	0	0	0	0	0	0
G10355.55	14	-	2330	8	novel_in_catalog	ENSMUSG00000022199	novel	2348	10	coding	241	726	1291	2016	55145667	55144528	FALSE	TRUE	TRUE	Full	1	30	6.93602	0.0135245	F	0	0	0	0	0	0	0	0	0	0	0	0	0	0	0	0	0	0	0	0	0	0	0	0
G10355.56	14	-	2275	10	full-splice_match	ENSMUSG00000022199	ENSMUST00000228495	2340	10	coding	520	1563	463	2025	55149965	55144528	FALSE	TRUE	FALSE	Full	1	30	3.31681	0.00646742	F	2	0	0	0	0	0	0	0	0	0	0	0	0	0	0	0	0	0	0	0	0	0	0	0
G10355.6	14	-	2419	8	novel_in_catalog	ENSMUSG00000022199	novel	2294	9	coding	241	726	1353	2078	55145667	55144528	FALSE	TRUE	TRUE	Full	3	30	4.45718	0.00869102	F	0	0	3	0	0	0	0	0	0	0	0	0	0	0	0	0	0	0	0	0	0	0	0	0
G10355.8	14	-	2264	11	novel_not_in_catalog	ENSMUSG00000022199	novel	2348	10	coding	593	1782	463	2244	55149965	55144209	FALSE	TRUE	TRUE	Partial	4	30	4.83758	0.00943275	F	0	0	0	0	0	0	0	0	2	0	0	0	0	0	0	0	4	3	0	0	0	0	0	0
G10356.2	14	-	2310	6	full-splice_match	ENSMUSG00000022203	ENSMUST00000022813	2705	6	coding	560	1683	166	1848	55162912	55154555	FALSE	TRUE	TRUE	Full	1	1	3.31681	1	T	2	0	0	0	0	0	0	0	0	0	0	0	0	0	0	0	0	0	0	0	0	0	0	0
G10358.9	14	+	1396	6	fusion	ENSMUSG00000115234_ENSMUSG00000040759	novel	1095	5	coding	154	465	410	874	55174115	55179850	TRUE	TRUE	TRUE	Full	1	1	5.95036	1	T	0	0	0	0	0	0	0	0	0	0	0	0	0	0	0	0	0	0	0	0	0	0	0	0
G10359.2	14	+	2585	3	novel_not_in_catalog	ENSMUSG00000097652	novel	828	5	coding	135	408	881	1288	55211998	55212405	FALSE	TRUE	TRUE	Full	1	1	3.09713	1	T	0	2	0	0	0	0	0	0	0	0	0	0	0	0	0	0	0	0	0	0	0	0	0	0
G1036.1	1	-	2358	5	fusion	ENSMUSG00000089844_ENSMUSG00000118640	novel	492	4	coding	212	639	119	757	85087089	85005675	FALSE	TRUE	TRUE	Full	1	1	3.32437	1	T	0	0	0	0	0	0	0	0	0	0	0	0	0	0	0	0	0	0	0	0	0	0	0	0
G10361.3	14	-	1742	10	novel_not_in_catalog	ENSMUSG00000053093	novel	6135	41	coding	353	1062	576	1637	55211421	55208250	FALSE	TRUE	TRUE	Full	9	6	5.19235	0.0611329	F	0	0	0	0	0	0	0	0	0	0	2	0	0	0	0	0	2	0	0	0	0	0	0	0
G10361.4	14	-	1355	8	incomplete-splice_match	ENSMUSG00000053093	ENSMUST00000102803	6135	41	coding	353	1062	189	1250	55211421	55208250	FALSE	TRUE	TRUE	Full	5	6	4.26151	0.0501736	F	2	0	0	0	0	0	0	0	0	0	0	0	0	0	0	0	0	0	2	0	0	2	0	0
G10361.5	14	-	1769	10	incomplete-splice_match	ENSMUSG00000053093	ENSMUST00000102803	6135	41	coding	507	1524	141	1664	55212759	55208250	FALSE	TRUE	TRUE	Full	48	6	42.8304	0.50427	T	15	27	12	23	31	21	18	10	14	19	16	12	8	19	41	19	32	24	26	22	21	25	25	8
G10361.6	14	-	1575	9	incomplete-splice_match	ENSMUSG00000053093	ENSMUST00000102803	6135	41	coding	353	1062	409	1470	55211421	55208250	FALSE	TRUE	TRUE	Full	2	6	3.45366	0.0406622	F	0	0	0	0	0	0	0	0	0	0	0	0	0	0	0	0	0	0	0	0	0	0	0	0
G10361.7	14	-	1439	7	incomplete-splice_match	ENSMUSG00000053093	ENSMUST00000102803	6135	41	coding	416	1251	84	1334	55211610	55208250	FALSE	TRUE	TRUE	Full	47	6	25.4183	0.299266	F	9	21	12	13	17	18	10	8	10	8	20	15	7	18	15	13	14	12	21	18	25	23	9	10
G10361.8	14	-	1550	9	novel_not_in_catalog	ENSMUSG00000053093	novel	6135	41	coding	353	1062	385	1446	55211421	55208250	FALSE	TRUE	TRUE	Full	1	6	3.77923	0.0444953	F	0	0	0	0	0	0	0	0	0	0	0	0	0	0	0	0	0	0	0	0	0	0	0	0
G10363.12	14	+	1305	10	novel_in_catalog	ENSMUSG00000022204	novel	1200	11	coding	148	447	23	469	55253034	55259092	TRUE	TRUE	TRUE	Full	1	11	3.65303	0.0318579	F	0	0	0	0	0	0	0	0	0	0	0	0	0	0	0	0	0	0	0	0	0	0	0	0
G10363.13	14	+	1170	10	novel_in_catalog	ENSMUSG00000022204	novel	1200	11	coding	179	540	508	1047	55259054	55261465	FALSE	TRUE	TRUE	Full	5	11	3.57759	0.0312	F	0	0	0	0	0	0	0	0	0	0	2	0	2	0	2	0	0	0	0	0	0	2	0	0
G10363.14	14	+	1021	10	novel_in_catalog	ENSMUSG00000022204	novel	1200	11	coding	291	876	23	898	55253034	55261465	FALSE	TRUE	TRUE	Full	7	11	4.93067	0.0430002	F	0	0	0	0	3	0	0	5	0	0	2	2	0	0	0	3	0	0	0	0	0	0	0	0
G10363.15	14	+	1381	11	novel_not_in_catalog	ENSMUSG00000022204	novel	1200	11	coding	290	873	386	1258	55254526	55261465	FALSE	TRUE	TRUE	Full	3	11	4.26247	0.0371728	F	0	0	0	0	0	0	0	3	0	0	0	0	0	0	0	0	0	0	0	0	0	0	0	2
G10363.17	14	+	1225	11	novel_not_in_catalog	ENSMUSG00000022204	novel	1200	11	coding	290	873	229	1101	55254526	55261465	FALSE	TRUE	TRUE	Full	3	11	5.40325	0.0471215	F	0	0	0	0	0	0	0	0	0	0	0	0	0	0	0	0	0	0	0	0	0	0	0	0
G10363.18	14	+	818	8	incomplete-splice_match	ENSMUSG00000022204	ENSMUST00000022815	1200	11	coding	179	540	156	695	55259054	55261465	FALSE	TRUE	TRUE	Full	1	11	2.79612	0.0243849	F	0	0	0	0	0	0	0	0	0	0	0	0	0	2	0	0	0	0	0	0	0	0	0	0
G10363.19	14	+	630	5	incomplete-splice_match	ENSMUSG00000022204	ENSMUST00000022815	1200	11	coding	71	216	291	506	55260526	55261465	FALSE	TRUE	TRUE	Full	1	11	3.46801	0.0302444	F	0	0	0	0	0	0	0	0	0	0	0	0	0	0	0	0	0	0	0	0	0	0	0	0
G10363.3	14	+	1449	9	novel_in_catalog	ENSMUSG00000022204	novel	1200	11	coding	135	408	90	497	55253034	55258976	TRUE	TRUE	TRUE	Full	2	11	3.72717	0.0325045	F	0	0	0	0	0	0	0	0	0	0	0	0	0	0	0	0	0	0	0	0	0	0	0	0
G10363.7	14	+	1093	11	full-splice_match	ENSMUSG00000022204	ENSMUST00000022815	1200	11	coding	315	948	23	970	55253034	55261465	FALSE	TRUE	TRUE	Full	48	11	70.4957	0.614791	T	20	31	42	37	43	38	43	44	25	49	38	36	33	59	33	70	31	30	66	41	31	37	30	16
G10363.8	14	+	1203	11	full-splice_match	ENSMUSG00000022204	ENSMUST00000022815	1200	11	coding	315	948	23	970	55253034	55261465	FALSE	TRUE	TRUE	Full	4	11	5.40284	0.047118	F	0	0	0	0	0	0	0	0	0	0	0	0	0	0	0	0	0	0	0	0	0	0	0	0
G10363.9	14	+	1351	11	full-splice_match	ENSMUSG00000022204	ENSMUST00000022815	1200	11	coding	315	948	23	970	55253034	55261465	FALSE	TRUE	TRUE	Full	26	11	6.94937	0.0606052	F	0	6	2	0	4	2	2	5	3	2	5	2	3	4	3	2	0	0	0	3	4	2	3	0
G10364.1	14	+	1881	5	novel_not_in_catalog	ENSMUSG00000072492	novel	1328	2	coding	174	525	1215	1739	55279769	55280293	FALSE	TRUE	TRUE	Full	2	3	3.10539	0.301828	F	0	0	0	0	0	0	0	0	0	0	0	0	0	0	0	0	0	0	0	0	0	0	0	0
G10364.2	14	+	1546	3	novel_not_in_catalog	ENSMUSG00000072492	novel	1328	2	coding	132	399	180	578	55265640	55279467	FALSE	TRUE	TRUE	Full	5	3	4.04018	0.392684	T	0	0	0	0	0	0	0	0	0	0	0	0	0	0	0	0	0	0	0	0	0	0	0	0
G10364.3	14	+	1547	3	novel_not_in_catalog	ENSMUSG00000072492	novel	1328	2	coding	107	324	259	582	55273131	55279467	FALSE	TRUE	TRUE	Full	1	3	3.14305	0.305488	F	0	0	0	0	0	0	0	0	0	0	0	0	0	0	0	0	0	0	0	0	0	0	0	0
G10365.10	14	+	1961	3	novel_not_in_catalog	ENSMUSG00000100162	novel	792	3	non_coding	NA	NA	NA	NA	NA	NA	NA	TRUE	TRUE	Full	2	10	3.58755	0.0536963	F	0	0	0	0	0	0	0	0	0	0	0	0	0	0	0	0	0	0	0	0	0	0	0	0
G10365.11	14	+	756	2	incomplete-splice_match	ENSMUSG00000093452	ENSMUST00000176872	472	4	non_coding	NA	NA	NA	NA	NA	NA	NA	TRUE	TRUE	Full	4	10	4.94002	0.0739393	F	0	0	0	2	0	0	0	0	0	0	0	0	0	0	0	0	0	0	0	0	0	0	0	0
G10365.12	14	+	1701	4	novel_not_in_catalog	ENSMUSG00000093452	novel	4375	5	non_coding	NA	NA	NA	NA	NA	NA	NA	TRUE	TRUE	Full	1	10	2.88641	0.043202	F	0	0	0	0	0	0	0	0	0	0	0	0	0	0	0	0	0	0	0	0	0	0	0	0
G10365.13	14	+	1897	3	novel_in_catalog	ENSMUSG00000100162	novel	792	3	non_coding	NA	NA	NA	NA	NA	NA	NA	TRUE	TRUE	Full	1	10	3.14531	0.0470771	F	0	0	0	0	0	0	0	0	0	0	0	0	0	0	0	0	0	0	0	0	0	0	0	0
G10365.23	14	+	2798	2	full-splice_match	ENSMUSG00000045691	ENSMUST00000050575	2830	2	coding	224	675	650	1324	55332917	55334964	FALSE	TRUE	TRUE	Full	46	10	29.8235	0.44638	T	21	24	12	16	6	8	9	0	28	17	19	17	6	8	23	0	17	20	9	28	26	18	40	12
G10365.5	14	+	1610	4	novel_not_in_catalog	ENSMUSG00000100162	novel	670	3	non_coding	NA	NA	NA	NA	NA	NA	NA	TRUE	TRUE	Full	1	10	4.64569	0.0695339	F	0	3	0	0	0	0	0	0	0	0	0	0	0	0	0	0	0	0	0	0	0	0	0	0
G10365.6	14	+	2252	4	novel_not_in_catalog	ENSMUSG00000100162	novel	670	3	non_coding	NA	NA	NA	NA	NA	NA	NA	TRUE	TRUE	Full	1	10	3.42035	0.0511938	F	0	0	0	0	0	0	0	0	0	0	0	0	0	0	0	0	2	0	0	0	0	0	0	0
G10365.7	14	+	2384	4	fusion	ENSMUSG00000045691_ENSMUSG00000093452	novel	4375	5	non_coding	NA	NA	NA	NA	NA	NA	NA	TRUE	TRUE	Full	22	10	5.06004	0.0757357	F	3	3	0	0	0	3	3	0	2	0	2	0	0	3	0	0	4	3	5	5	0	2	0	4
G10365.8	14	+	816	2	incomplete-splice_match	ENSMUSG00000093452	ENSMUST00000183750	4375	5	non_coding	NA	NA	NA	NA	NA	NA	NA	TRUE	TRUE	Full	8	10	3.5304	0.052841	F	0	0	0	0	0	0	0	0	0	0	0	2	0	0	0	0	0	0	0	0	0	0	0	0
G10365.9	14	+	2351	4	novel_in_catalog	ENSMUSG00000100162	novel	670	3	non_coding	NA	NA	NA	NA	NA	NA	NA	TRUE	TRUE	Full	21	10	5.77262	0.0864011	F	3	3	5	4	4	3	3	0	0	0	0	5	0	3	0	0	4	3	0	0	0	9	3	2
G10368.1	14	-	2718	19	novel_in_catalog	ENSMUSG00000040701	novel	2673	22	coding	399	1200	1311	2510	55340001	55336517	FALSE	TRUE	TRUE	Full	1	1	6.93602	1	T	0	0	0	0	0	0	0	0	0	0	0	0	0	0	0	0	0	0	0	0	0	0	0	0
G1037.2	1	-	1595	3	full-splice_match	ENSMUSG00000052477	ENSMUST00000161267	652	3	coding	119	360	115	474	85247785	85090166	FALSE	TRUE	TRUE	Full	1	2	3.06646	0.389198	F	0	0	0	0	0	0	0	0	0	0	0	0	0	0	0	0	0	0	0	0	0	2	0	0
G1037.3	1	-	1571	3	novel_in_catalog	ENSMUSG00000052477	novel	652	3	coding	119	360	116	475	85247785	85090166	FALSE	TRUE	TRUE	Full	9	2	4.81246	0.610802	T	0	0	0	0	0	0	2	0	0	0	2	0	0	0	6	2	0	0	2	3	2	0	2	4
G10374.1	14	+	1826	7	novel_in_catalog	ENSMUSG00000022210	novel	1392	8	coding	281	846	198	1043	55716417	55725409	TRUE	TRUE	TRUE	Full	2	13	3.4115	0.0428795	F	0	0	0	0	0	0	0	0	0	2	0	0	0	0	0	0	0	0	0	0	0	0	0	0
G10374.10	14	+	1801	6	novel_in_catalog	ENSMUSG00000022210	novel	1392	8	coding	145	438	85	522	55716417	55724633	TRUE	TRUE	TRUE	Full	1	13	2.91761	0.0366717	F	0	0	0	0	0	0	0	0	0	0	0	0	0	0	0	0	0	0	0	0	0	0	0	0
G10374.11	14	+	823	5	novel_not_in_catalog	ENSMUSG00000022210	novel	828	5	coding	143	432	81	512	55716417	55724717	FALSE	TRUE	TRUE	Full	1	13	3.20782	0.0403194	F	0	0	0	0	0	0	0	0	0	0	0	0	0	0	2	0	0	0	0	0	0	0	0	0
G10374.12	14	+	2058	5	novel_in_catalog	ENSMUSG00000022210	novel	1392	8	coding	145	438	62	499	55716417	55724633	TRUE	TRUE	TRUE	Full	1	13	4.19992	0.0527892	F	0	0	0	0	0	0	0	0	0	0	0	0	0	0	0	0	0	0	0	0	0	0	0	0
G10374.13	14	+	999	7	incomplete-splice_match	ENSMUSG00000022210	ENSMUST00000022821	1392	8	coding	152	459	136	594	55723646	55727390	FALSE	TRUE	TRUE	Full	2	13	3.56052	0.0447525	F	0	0	0	0	0	0	0	0	0	0	0	0	0	0	0	0	0	0	0	0	0	0	0	0
G10374.2	14	+	937	3	incomplete-splice_match	ENSMUSG00000022210	ENSMUST00000226168	828	5	coding	160	483	193	675	55716417	55723804	FALSE	TRUE	TRUE	Full	1	13	3.15622	0.0396709	F	0	0	0	0	0	0	0	0	0	0	0	0	0	0	0	0	0	0	0	0	0	0	0	0
G10374.3	14	+	1369	8	full-splice_match	ENSMUSG00000022210	ENSMUST00000022821	1392	8	coding	260	783	183	965	55716417	55727390	FALSE	TRUE	TRUE	Full	48	13	37.967	0.477211	T	25	10	16	14	21	19	15	21	28	30	14	20	17	28	27	22	31	24	29	27	24	28	19	20
G10374.4	14	+	1466	7	novel_in_catalog	ENSMUSG00000022210	novel	1392	8	coding	145	438	183	620	55716417	55724633	TRUE	TRUE	TRUE	Full	2	13	2.97643	0.0374111	F	0	0	0	0	0	0	0	0	0	0	0	0	0	0	0	0	0	0	0	0	0	2	0	0
G10374.5	14	+	1015	4	incomplete-splice_match	ENSMUSG00000022210	ENSMUST00000226168	828	5	coding	145	438	183	620	55716417	55724633	FALSE	TRUE	TRUE	Full	8	13	4.14238	0.052066	F	0	0	0	0	0	0	2	0	0	3	0	0	0	2	0	0	0	0	5	2	0	0	0	0
G10374.6	14	+	907	5	full-splice_match	ENSMUSG00000022210	ENSMUST00000226168	828	5	coding	197	594	171	764	55716417	55724885	FALSE	TRUE	TRUE	Full	3	13	3.39104	0.0426224	F	0	0	0	2	0	0	0	0	0	0	0	0	0	2	0	0	0	0	0	0	0	0	0	0
G10374.7	14	+	1216	8	novel_not_in_catalog	ENSMUSG00000022210	novel	1392	8	coding	226	681	132	812	55716417	55727390	FALSE	TRUE	TRUE	Full	1	13	3.4856	0.0438109	F	0	0	0	0	0	0	0	0	0	2	0	0	0	0	0	0	0	0	0	0	0	0	0	0
G10374.8	14	+	1641	6	novel_in_catalog	ENSMUSG00000022210	novel	1392	8	coding	145	438	88	525	55716417	55724633	TRUE	TRUE	TRUE	Full	1	13	3.65303	0.0459153	F	0	0	0	0	0	0	0	0	0	0	0	0	0	0	0	0	0	0	0	0	0	0	0	0
G10374.9	14	+	1202	7	novel_in_catalog	ENSMUSG00000022210	novel	1392	8	coding	142	429	86	514	55716417	55725063	TRUE	TRUE	TRUE	Full	1	13	3.49114	0.0438805	F	0	0	0	0	0	0	0	0	0	0	0	0	0	0	0	0	0	0	0	0	0	0	0	0
G10375.1	14	-	1095	2	antisense	novelGene_ENSMUSG00000022211_AS	novel	NA	NA	coding	74	225	269	493	55728616	55728392	FALSE	TRUE	TRUE	Full	4	1	5.12258	1	T	0	0	0	0	0	0	0	2	0	0	0	0	0	0	0	0	0	0	0	0	0	0	0	0
G10376.3	14	+	612	3	incomplete-splice_match	ENSMUSG00000022211	ENSMUST00000226388	3833	22	coding	102	309	3	311	55744855	55745402	FALSE	TRUE	TRUE	Full	1	1	3.50876	1	T	0	0	0	0	0	0	0	2	0	0	0	0	0	0	0	0	0	0	0	0	0	0	0	0
G10377.10	14	+	2561	16	novel_not_in_catalog	ENSMUSG00000022212	novel	2201	17	coding	491	1476	243	1718	55749442	55753611	TRUE	TRUE	TRUE	Full	1	48	3.49114	0.00660979	F	0	0	0	0	0	0	0	0	0	0	0	0	0	0	0	0	0	0	0	0	0	0	0	0
G10377.11	14	+	2471	16	novel_not_in_catalog	ENSMUSG00000022212	novel	2201	17	coding	491	1476	152	1627	55749442	55753611	TRUE	TRUE	TRUE	Full	1	48	4.38121	0.00829496	F	0	0	0	0	0	0	0	0	0	0	0	0	0	0	0	0	0	0	0	0	0	0	0	2
G10377.12	14	+	2348	17	novel_in_catalog	ENSMUSG00000022212	novel	2178	17	coding	557	1674	439	2112	55749442	55754544	FALSE	TRUE	TRUE	Full	48	48	225.378	0.426709	T	81	111	114	112	171	162	121	90	97	107	95	96	73	140	164	67	114	126	102	130	160	140	157	96
G10377.13	14	+	2170	17	full-splice_match	ENSMUSG00000022212	ENSMUST00000074225	2201	17	coding	557	1674	261	1934	55749442	55754544	FALSE	TRUE	TRUE	Full	48	48	110.109	0.208469	F	52	83	70	63	94	80	77	48	71	67	45	71	40	100	78	40	87	89	53	107	95	91	105	66
G10377.14	14	+	1892	16	novel_in_catalog	ENSMUSG00000022212	novel	2201	17	coding	518	1557	159	1715	55749442	55754709	FALSE	TRUE	TRUE	Full	1	48	3.19754	0.00605392	F	0	0	0	0	0	0	0	0	0	0	0	0	0	0	0	0	0	2	0	0	0	0	0	0
G10377.17	14	+	2481	17	novel_not_in_catalog	ENSMUSG00000022212	novel	2201	17	coding	557	1674	572	2245	55749442	55754544	FALSE	TRUE	TRUE	Full	1	48	3.65303	0.0069163	F	0	0	0	0	0	0	0	0	0	0	0	0	0	0	0	0	0	0	0	0	0	0	0	0
G10377.19	14	+	2158	16	incomplete-splice_match	ENSMUSG00000022212	ENSMUST00000074225	2201	17	coding	557	1674	143	1816	55749442	55754544	FALSE	TRUE	TRUE	Full	9	48	3.58086	0.00677965	F	0	2	0	2	0	3	0	0	0	0	2	0	0	0	3	0	0	2	0	2	0	0	0	0
G10377.2	14	+	2174	18	novel_not_in_catalog	ENSMUSG00000022212	novel	2201	17	coding	557	1674	264	1937	55749442	55754544	FALSE	TRUE	TRUE	Full	1	48	2.85755	0.00541021	F	0	0	0	0	0	0	0	0	0	0	0	0	0	0	0	0	0	0	0	2	0	0	0	0
G10377.20	14	+	2460	15	novel_in_catalog	ENSMUSG00000022212	novel	2201	17	coding	491	1476	143	1618	55749442	55753611	TRUE	TRUE	TRUE	Full	15	48	4.83355	0.00915139	F	0	3	0	0	2	0	0	0	0	3	3	0	0	2	0	0	0	0	0	2	0	0	0	2
G10377.21	14	+	2557	15	novel_in_catalog	ENSMUSG00000022212	novel	2201	17	coding	316	951	765	1715	55751118	55753611	TRUE	TRUE	TRUE	Full	2	48	3.3553	0.00635261	F	0	2	0	0	0	0	0	0	0	0	0	2	0	0	0	0	0	0	0	0	0	0	0	0
G10377.22	14	+	1930	17	novel_not_in_catalog	ENSMUSG00000022212	novel	2201	17	coding	580	1743	120	1862	55749442	55754819	FALSE	TRUE	TRUE	Full	1	48	2.88641	0.00546485	F	0	0	0	0	0	0	0	0	0	0	0	0	0	0	0	0	0	0	0	0	0	0	0	0
G10377.23	14	+	1897	16	novel_in_catalog	ENSMUSG00000022212	novel	2201	17	coding	557	1674	120	1793	55749442	55754544	FALSE	TRUE	FALSE	Full	1	48	3.092	0.0058541	F	0	0	0	0	0	0	0	0	0	0	0	0	0	0	0	0	0	0	0	0	0	0	0	0
G10377.24	14	+	2136	16	novel_in_catalog	ENSMUSG00000022212	novel	2201	17	coding	557	1674	120	1793	55749442	55754544	FALSE	TRUE	TRUE	Full	14	48	4.01238	0.00759665	F	0	0	0	0	0	2	0	0	0	0	0	0	0	2	2	0	0	0	0	2	0	0	0	0
G10377.25	14	+	2101	16	novel_in_catalog	ENSMUSG00000022212	novel	2201	17	coding	417	1254	120	1373	55749442	55753726	TRUE	TRUE	TRUE	Full	13	48	4.1021	0.00776653	F	0	0	0	0	0	0	2	0	0	2	0	0	0	0	0	0	0	0	0	2	0	0	0	0
G10377.26	14	+	2438	15	novel_in_catalog	ENSMUSG00000022212	novel	2201	17	coding	491	1476	120	1595	55749442	55753611	TRUE	TRUE	TRUE	Full	45	48	11.8016	0.022344	F	3	6	5	11	3	2	0	3	10	10	10	8	4	8	3	3	2	7	7	5	7	9	3	0
G10377.27	14	+	2517	14	novel_in_catalog	ENSMUSG00000022212	novel	2201	17	coding	395	1188	120	1307	55749442	55753243	TRUE	TRUE	TRUE	Full	21	48	6.01388	0.0113861	F	0	0	2	3	0	0	2	0	4	2	6	0	0	7	0	0	0	0	0	0	2	0	0	4
G10377.28	14	+	2190	15	novel_not_in_catalog	ENSMUSG00000022212	novel	2201	17	coding	218	657	120	776	55749442	55751334	TRUE	TRUE	TRUE	Full	2	48	3.20161	0.00606161	F	0	0	0	0	0	0	0	0	0	2	0	0	0	0	0	0	0	0	0	0	0	0	0	0
G10377.29	14	+	2201	16	novel_in_catalog	ENSMUSG00000022212	novel	2201	17	coding	614	1845	120	1964	55749442	55754544	FALSE	TRUE	TRUE	Full	2	48	3.02754	0.00573206	F	0	0	0	0	0	0	0	0	0	0	0	0	0	0	0	0	0	2	0	2	0	0	0	0
G10377.3	14	+	2640	16	novel_not_in_catalog	ENSMUSG00000022212	novel	2201	17	coding	316	951	847	1797	55751118	55753611	TRUE	TRUE	TRUE	Full	1	48	2.79612	0.00529391	F	0	0	0	0	0	0	0	0	0	0	0	0	0	2	0	0	0	0	0	0	0	0	0	0
G10377.31	14	+	3709	14	novel_in_catalog	ENSMUSG00000022212	novel	2657	15	coding	491	1476	1391	2866	55749442	55753611	TRUE	TRUE	TRUE	Full	6	48	3.3638	0.0063687	F	0	0	0	0	0	0	0	0	0	0	0	0	0	0	0	0	0	2	0	0	0	0	0	0
G10377.32	14	+	1988	17	novel_in_catalog	ENSMUSG00000022212	novel	2201	17	coding	557	1674	118	1791	55749442	55754544	FALSE	TRUE	TRUE	Full	1	48	2.75893	0.00522349	F	0	0	0	0	0	0	0	0	0	0	0	0	0	0	0	0	0	0	0	0	0	0	0	0
G10377.34	14	+	1916	17	novel_not_in_catalog	ENSMUSG00000022212	novel	2201	17	coding	571	1716	134	1849	55749442	55754819	FALSE	TRUE	TRUE	Full	1	48	3.20782	0.00607337	F	0	0	0	0	0	0	0	0	0	0	0	0	0	0	2	0	0	0	0	0	0	0	0	0
G10377.36	14	+	2363	16	novel_in_catalog	ENSMUSG00000022212	novel	2201	17	coding	456	1371	111	1481	55749442	55753577	TRUE	TRUE	TRUE	Full	6	48	3.78819	0.0071722	F	0	0	0	0	0	0	0	0	0	0	0	0	0	0	0	0	0	0	0	3	0	2	0	0
G10377.37	14	+	2620	13	novel_in_catalog	ENSMUSG00000022212	novel	2201	17	coding	395	1188	111	1298	55749442	55753243	TRUE	TRUE	TRUE	Full	1	48	2.95845	0.00560124	F	0	0	0	0	0	0	0	0	0	0	0	0	0	0	0	0	0	0	0	0	0	0	0	0
G10377.38	14	+	1966	16	novel_in_catalog	ENSMUSG00000022212	novel	2201	17	coding	537	1614	111	1724	55749442	55754544	FALSE	TRUE	TRUE	Full	1	48	3.07509	0.00582208	F	0	0	0	0	0	0	0	0	0	0	0	0	0	0	0	0	0	0	0	0	2	0	0	0
G10377.39	14	+	1999	17	novel_not_in_catalog	ENSMUSG00000022212	novel	2201	17	coding	552	1659	105	1763	55749457	55754544	FALSE	TRUE	TRUE	Full	1	48	3.62379	0.00686093	F	0	0	0	0	0	0	0	0	0	0	0	0	0	0	0	0	0	0	0	0	0	0	0	0
G10377.4	14	+	2516	16	novel_not_in_catalog	ENSMUSG00000022212	novel	2201	17	coding	491	1476	199	1674	55749442	55753611	TRUE	TRUE	TRUE	Full	1	48	5.5351	0.0104796	F	0	0	0	0	0	0	0	0	0	0	0	0	0	0	0	0	0	0	0	0	0	0	0	0
G10377.40	14	+	2367	16	novel_in_catalog	ENSMUSG00000022212	novel	2201	17	coding	456	1371	124	1494	55749442	55753577	TRUE	TRUE	TRUE	Full	1	48	3.14305	0.00595076	F	0	0	0	0	0	0	0	0	0	0	0	0	0	0	0	0	0	0	0	0	0	0	0	0
G10377.42	14	+	2237	17	novel_not_in_catalog	ENSMUSG00000022212	novel	2201	17	coding	557	1674	328	2001	55749442	55754544	FALSE	TRUE	TRUE	Full	1	48	2.75893	0.00522349	F	0	0	0	0	0	0	0	0	0	0	0	0	0	0	0	0	0	0	0	0	0	0	0	0
G10377.43	14	+	3759	13	novel_in_catalog	ENSMUSG00000022212	novel	2657	15	coding	395	1188	1362	2549	55749442	55753243	TRUE	TRUE	TRUE	Full	1	48	3.09713	0.0058638	F	0	2	0	0	0	0	0	0	0	0	0	0	0	0	0	0	0	0	0	0	0	0	0	0
G10377.46	14	+	2005	17	full-splice_match	ENSMUSG00000022212	ENSMUST00000163767	2004	17	coding	557	1674	96	1769	55749442	55754544	FALSE	TRUE	TRUE	Full	42	48	11.9221	0.0225722	F	0	9	3	7	4	6	7	5	7	0	4	3	10	9	2	3	2	4	4	12	6	10	5	0
G10377.47	14	+	2414	15	novel_in_catalog	ENSMUSG00000022212	novel	2004	17	coding	491	1476	96	1571	55749442	55753611	TRUE	TRUE	TRUE	Full	1	48	3.06646	0.00580574	F	0	0	0	0	0	0	0	0	0	0	0	0	0	0	0	0	0	0	0	0	0	2	0	0
G10377.48	14	+	2539	16	incomplete-splice_match	ENSMUSG00000022212	ENSMUST00000074225	2201	17	coding	557	1674	629	2302	55749442	55754544	FALSE	TRUE	TRUE	Full	40	48	8.0593	0.0152587	F	5	10	8	0	3	2	0	4	4	4	2	2	2	8	7	0	2	10	5	5	6	4	0	4
G10377.49	14	+	2174	16	novel_in_catalog	ENSMUSG00000022212	novel	2004	17	coding	614	1845	93	1937	55749442	55754544	FALSE	TRUE	TRUE	Full	1	48	3.32437	0.00629405	F	0	0	0	0	0	0	0	0	0	0	0	0	0	0	0	0	0	0	0	0	0	0	0	0
G10377.5	14	+	2153	18	novel_not_in_catalog	ENSMUSG00000022212	novel	2201	17	coding	557	1674	243	1916	55749442	55754544	FALSE	TRUE	TRUE	Full	2	48	4.28263	0.00810832	F	0	0	0	0	0	0	0	0	0	0	3	0	0	0	0	0	0	0	2	0	0	0	0	0
G10377.50	14	+	2322	16	novel_in_catalog	ENSMUSG00000022212	novel	2004	17	coding	456	1371	76	1446	55749442	55753577	TRUE	TRUE	TRUE	Full	1	48	3.62138	0.00685638	F	0	0	0	0	0	0	0	0	0	0	0	0	0	0	0	0	0	0	0	0	0	0	0	0
G10377.54	14	+	1714	15	incomplete-splice_match	ENSMUSG00000022212	ENSMUST00000163767	2004	17	coding	382	1149	329	1477	55751118	55754544	FALSE	TRUE	TRUE	Full	10	48	3.53937	0.0067011	F	0	0	0	0	0	0	0	0	0	0	0	0	0	0	0	0	4	0	2	2	0	0	0	0
G10377.56	14	+	1565	14	incomplete-splice_match	ENSMUSG00000022212	ENSMUST00000163767	2004	17	coding	382	1149	180	1328	55751118	55754544	FALSE	TRUE	TRUE	Full	5	48	4.39629	0.00832351	F	0	0	0	0	2	0	0	0	3	0	0	0	0	0	0	2	3	0	0	0	0	0	0	0
G10377.57	14	+	1490	13	incomplete-splice_match	ENSMUSG00000022212	ENSMUST00000163767	2004	17	coding	382	1149	104	1252	55751118	55754544	FALSE	TRUE	TRUE	Full	2	48	3.88788	0.00736095	F	0	0	0	0	0	0	0	0	0	0	0	0	0	0	0	0	0	0	2	0	0	3	0	0
G10377.6	14	+	2156	18	novel_not_in_catalog	ENSMUSG00000022212	novel	2201	17	coding	557	1674	247	1920	55749442	55754544	FALSE	TRUE	TRUE	Full	3	48	4.97049	0.00941065	F	0	0	0	0	0	0	0	0	0	3	0	0	2	0	0	0	0	0	0	0	0	0	0	0
G10377.60	14	+	1325	11	incomplete-splice_match	ENSMUSG00000022212	ENSMUST00000163767	2004	17	coding	309	930	159	1088	55751763	55754544	FALSE	TRUE	TRUE	Full	7	48	3.76515	0.00712857	F	0	0	0	0	0	0	3	0	0	0	0	0	0	0	0	0	0	2	0	2	0	0	0	2
G10377.63	14	+	1136	9	incomplete-splice_match	ENSMUSG00000022212	ENSMUST00000163767	2004	17	coding	298	897	3	899	55752022	55754544	FALSE	TRUE	TRUE	Full	7	48	4.22828	0.00800542	F	0	3	3	0	0	0	0	0	0	0	0	0	0	0	0	0	0	0	4	0	0	0	0	0
G10377.64	14	+	1046	8	incomplete-splice_match	ENSMUSG00000022212	ENSMUST00000163767	2004	17	coding	258	777	33	809	55752709	55754544	FALSE	TRUE	TRUE	Full	6	48	4.26153	0.00806837	F	0	0	0	0	0	0	0	0	0	0	0	0	0	0	0	5	2	0	0	0	0	0	0	0
G10377.7	14	+	2167	18	novel_not_in_catalog	ENSMUSG00000022212	novel	2201	17	coding	557	1674	257	1930	55749442	55754544	FALSE	TRUE	TRUE	Full	1	48	4.28632	0.00811531	F	0	0	0	0	0	0	0	0	0	0	0	0	0	0	0	0	0	0	0	3	0	0	0	0
G10377.70	14	+	575	3	incomplete-splice_match	ENSMUSG00000022212	ENSMUST00000163767	2004	17	coding	109	330	9	338	55754029	55754544	FALSE	TRUE	TRUE	Full	5	48	3.50355	0.00663329	F	0	0	0	0	0	0	0	0	0	0	0	0	0	0	0	2	0	0	2	0	0	0	0	0
G10377.71	14	+	375	2	incomplete-splice_match	ENSMUSG00000022212	ENSMUST00000163767	2004	17	non_coding	NA	NA	NA	NA	NA	NA	NA	TRUE	TRUE	Full	3	48	4.69972	0.00889801	F	0	0	0	0	0	0	0	0	0	0	0	0	0	0	0	0	0	0	0	0	0	0	0	0
G10377.8	14	+	1992	17	novel_not_in_catalog	ENSMUSG00000022212	novel	2657	15	coding	557	1674	82	1755	55749442	55754544	FALSE	TRUE	TRUE	Full	2	48	4.81864	0.00912315	F	0	0	0	0	0	0	0	0	0	0	0	0	0	0	0	0	0	0	0	0	0	0	0	0
G10377.9	14	+	2222	17	novel_not_in_catalog	ENSMUSG00000022212	novel	2201	17	coding	557	1674	201	1874	55749442	55754544	FALSE	TRUE	TRUE	Full	1	48	4.46277	0.00844939	F	0	0	0	0	0	0	0	0	0	0	0	0	0	0	0	0	0	0	0	0	0	0	0	0
G10378.1	14	+	1931	8	novel_in_catalog	ENSMUSG00000040618	novel	4625	10	coding	357	1074	742	1815	55781518	55786216	FALSE	TRUE	TRUE	Full	3	19	3.37217	0.0325568	F	0	0	0	0	0	0	0	0	0	0	0	0	0	0	0	0	0	0	0	0	0	0	0	0
G10378.10	14	+	2225	10	full-splice_match	ENSMUSG00000040618	ENSMUST00000048781	3400	10	coding	640	1923	192	2114	55777942	55786216	FALSE	TRUE	TRUE	Full	47	19	24.2278	0.233909	T	21	26	17	14	3	7	8	6	15	9	26	11	6	21	10	2	30	31	4	22	18	24	20	20
G10378.11	14	+	2289	10	full-splice_match	ENSMUSG00000040618	ENSMUST00000048781	3400	10	coding	640	1923	192	2114	55777942	55786216	FALSE	TRUE	TRUE	Full	45	19	17.3008	0.167031	F	7	16	13	9	0	9	3	4	11	7	10	3	7	6	5	0	19	25	3	16	18	15	20	7
G10378.12	14	+	2526	10	full-splice_match	ENSMUSG00000040618	ENSMUST00000048781	3400	10	coding	640	1923	177	2099	55777942	55786216	FALSE	TRUE	TRUE	Full	2	19	3.19595	0.0308554	F	2	0	0	0	0	0	0	0	0	0	0	0	0	0	0	0	0	0	0	0	2	0	0	0
G10378.13	14	+	2680	7	novel_in_catalog	ENSMUSG00000040618	novel	2417	9	coding	327	984	1517	2500	55782429	55786216	FALSE	TRUE	TRUE	Full	2	19	3.28283	0.0316942	F	0	0	0	0	0	0	0	0	0	0	0	0	0	0	0	0	2	0	0	0	0	0	0	0
G10378.14	14	+	1950	9	novel_not_in_catalog	ENSMUSG00000040618	novel	4625	10	coding	569	1710	130	1839	55777942	55786216	FALSE	TRUE	TRUE	Full	2	19	3.08164	0.0297519	F	0	0	2	2	0	0	0	0	0	0	0	0	0	0	0	0	0	0	0	0	0	0	0	0
G10378.15	14	+	2535	11	full-splice_match	ENSMUSG00000040618	ENSMUST00000226352	2784	11	coding	609	1830	128	1957	55777942	55786423	FALSE	TRUE	TRUE	Full	1	19	3.33721	0.0322192	F	0	0	0	0	0	0	0	0	0	0	0	0	0	0	0	0	0	0	0	0	0	0	2	0
G10378.16	14	+	1976	9	novel_in_catalog	ENSMUSG00000040618	novel	4625	10	coding	453	1362	504	1865	55781418	55786216	FALSE	TRUE	TRUE	Full	7	19	4.79233	0.0462677	F	3	0	0	0	0	0	0	0	0	0	0	0	0	0	0	0	0	0	0	2	0	0	0	0
G10378.17	14	+	2603	7	novel_in_catalog	ENSMUSG00000040618	novel	2417	9	coding	327	984	1509	2492	55782429	55786216	FALSE	TRUE	TRUE	Full	2	19	3.31211	0.0319769	F	0	0	0	0	0	0	0	0	0	0	0	0	0	0	0	0	0	0	0	0	0	0	0	0
G10378.18	14	+	2268	8	novel_in_catalog	ENSMUSG00000040618	novel	2417	9	coding	327	984	1174	2157	55782429	55786216	FALSE	TRUE	TRUE	Full	1	19	3.61348	0.0348865	F	0	0	0	0	0	0	0	0	0	0	0	2	0	0	0	0	0	0	0	0	0	0	0	0
G10378.19	14	+	2839	10	full-splice_match	ENSMUSG00000040618	ENSMUST00000048781	3400	10	coding	640	1923	107	2029	55777942	55786216	FALSE	TRUE	TRUE	Full	3	19	3.16104	0.0305183	F	0	0	0	2	0	0	0	0	0	0	0	0	0	0	0	0	0	0	0	0	0	0	2	0
G10378.20	14	+	1956	9	novel_not_in_catalog	ENSMUSG00000040618	novel	2784	11	coding	327	984	862	1845	55782429	55786216	FALSE	TRUE	TRUE	Full	1	19	3.06646	0.0296052	F	0	0	0	0	0	0	0	0	0	0	0	0	0	0	0	0	0	0	0	0	0	2	0	0
G10378.21	14	+	2002	9	novel_in_catalog	ENSMUSG00000040618	novel	4625	10	coding	308	927	898	1824	55782486	55786216	FALSE	TRUE	TRUE	Full	1	19	2.97518	0.028724	F	0	0	0	0	0	0	0	0	0	0	0	0	0	0	0	0	0	0	0	0	0	0	0	0
G10378.22	14	+	2756	8	novel_in_catalog	ENSMUSG00000040618	novel	2417	9	coding	327	984	1662	2645	55782429	55786216	FALSE	TRUE	TRUE	Full	1	19	6.84071	0.0660439	F	0	0	0	0	0	0	0	0	0	0	0	0	0	0	0	0	4	0	0	0	0	0	0	0
G10378.24	14	+	3063	10	full-splice_match	ENSMUSG00000040618	ENSMUST00000048781	3400	10	coding	640	1923	78	2000	55777942	55786216	FALSE	TRUE	TRUE	Full	1	19	4.19992	0.0405482	F	0	0	0	0	0	0	0	0	0	0	0	0	0	0	0	0	0	0	0	0	0	0	0	0
G10378.4	14	+	2137	9	novel_in_catalog	ENSMUSG00000040618	novel	4625	10	coding	453	1362	596	1957	55781418	55786216	FALSE	TRUE	TRUE	Full	5	19	3.53025	0.0340829	F	0	0	0	0	0	0	0	2	0	0	0	0	0	0	0	0	0	0	0	0	0	0	0	0
G10378.5	14	+	1949	8	novel_in_catalog	ENSMUSG00000040618	novel	4625	10	coding	357	1074	696	1769	55781518	55786216	FALSE	TRUE	TRUE	Full	4	19	3.14863	0.0303986	F	0	0	0	0	0	0	0	0	2	0	0	0	0	0	0	0	0	0	0	2	0	0	2	0
G10378.6	14	+	2109	9	novel_not_in_catalog	ENSMUSG00000040618	novel	4625	10	coding	569	1710	220	1929	55777942	55786216	FALSE	TRUE	TRUE	Full	3	19	3.68232	0.0355511	F	0	2	0	0	0	0	0	0	0	0	0	0	0	0	0	0	0	0	0	0	3	0	2	0
G10378.9	14	+	2927	8	novel_in_catalog	ENSMUSG00000040618	novel	2417	9	coding	327	984	1769	2752	55782429	55786216	FALSE	TRUE	TRUE	Full	3	19	3.45738	0.0333794	F	0	2	0	0	0	0	0	0	0	0	0	0	0	0	0	0	0	0	0	0	2	0	0	0
G1038.4	1	+	2884	21	novel_in_catalog	ENSMUSG00000026222	novel	2708	20	coding	644	1935	73	2007	85577823	85636839	FALSE	TRUE	TRUE	Full	2	6	4.13532	0.174136	F	0	0	0	2	0	0	0	0	3	0	0	0	0	0	0	0	0	0	0	0	0	0	0	0
G1038.5	1	+	2953	22	novel_in_catalog	ENSMUSG00000026222	novel	2708	20	coding	669	2010	67	2076	85577823	85636839	FALSE	TRUE	TRUE	Full	6	6	3.71096	0.156267	F	0	0	0	0	0	2	0	0	3	2	2	0	0	0	0	0	0	2	0	0	0	0	2	0
G1038.6	1	+	1627	17	full-splice_match	ENSMUSG00000026222	ENSMUST00000155094	1666	17	coding	482	1449	67	1515	85577823	85629179	FALSE	TRUE	TRUE	Full	5	6	3.62893	0.152812	F	0	2	0	0	0	0	0	0	0	2	3	0	0	0	0	0	0	2	0	0	0	0	0	0
G1038.7	1	+	1560	16	full-splice_match	ENSMUSG00000026222	ENSMUST00000147552	1597	16	coding	464	1395	53	1447	85577823	85629179	FALSE	TRUE	TRUE	Full	1	6	4.38121	0.184491	T	0	0	0	0	0	0	0	0	0	0	0	0	0	0	0	0	0	0	0	0	0	0	0	2
G1038.8	1	+	2827	21	novel_in_catalog	ENSMUSG00000026222	novel	2708	20	coding	632	1899	53	1951	85577823	85636839	FALSE	TRUE	TRUE	Full	1	6	3.51337	0.147946	F	0	0	0	0	0	0	0	0	2	0	0	0	0	0	0	0	0	0	0	0	0	0	0	0
G1038.9	1	+	2870	21	novel_in_catalog	ENSMUSG00000026222	novel	2708	20	coding	651	1956	38	1993	85577823	85636839	FALSE	TRUE	TRUE	Full	2	6	4.37783	0.184348	F	0	0	0	0	0	0	0	0	3	2	0	0	0	0	0	0	0	0	0	0	0	0	0	0
G10380.1	14	+	2715	16	novel_not_in_catalog	ENSMUSG00000022214	novel	2624	15	coding	549	1650	372	2021	55798745	55806828	FALSE	TRUE	TRUE	Full	1	39	3.51337	0.0173964	F	0	0	0	0	0	0	0	0	2	0	0	0	0	0	0	0	0	0	0	0	0	0	0	0
G10380.10	14	+	2500	15	novel_in_catalog	ENSMUSG00000022214	novel	2593	15	coding	505	1518	290	1807	55798854	55806828	FALSE	TRUE	TRUE	Full	37	39	7.28201	0.0360568	F	8	5	8	6	2	4	4	5	4	3	4	3	2	0	7	0	7	8	0	4	7	0	9	3
G10380.11	14	+	2523	15	full-splice_match	ENSMUSG00000022214	ENSMUST00000117236	2538	15	coding	549	1650	181	1830	55798745	55806828	FALSE	TRUE	TRUE	Full	43	39	11.0574	0.0547504	F	11	24	11	10	10	8	9	6	6	5	14	4	0	5	5	2	6	3	0	11	10	5	7	7
G10380.12	14	+	2472	15	novel_in_catalog	ENSMUSG00000022214	novel	2593	15	coding	505	1518	264	1781	55798854	55806828	FALSE	TRUE	TRUE	Full	3	39	3.1092	0.0153951	F	0	0	0	0	0	0	0	0	0	0	0	0	0	0	0	0	0	0	0	0	2	0	0	0
G10380.13	14	+	2497	15	novel_in_catalog	ENSMUSG00000022214	novel	2538	15	coding	549	1650	155	1804	55798745	55806828	FALSE	TRUE	TRUE	Full	2	39	4.32419	0.0214112	F	0	0	0	0	0	0	0	0	0	0	0	0	0	3	0	0	0	0	0	0	0	0	0	0
G10380.14	14	+	2527	15	novel_not_in_catalog	ENSMUSG00000022214	novel	2538	15	coding	549	1650	186	1835	55798745	55806828	FALSE	TRUE	TRUE	Full	1	39	3.62138	0.0179312	F	0	0	0	0	0	0	0	0	0	0	0	0	0	0	0	0	0	0	0	0	0	0	0	0
G10380.15	14	+	2669	15	full-splice_match	ENSMUSG00000022214	ENSMUST00000152681	2624	15	coding	505	1518	459	1976	55798854	55806828	FALSE	TRUE	TRUE	Full	30	39	5.72696	0.028357	F	9	4	2	2	0	0	2	0	3	4	4	3	2	2	2	0	3	5	0	2	0	2	5	2
G10380.16	14	+	2692	15	novel_in_catalog	ENSMUSG00000022214	novel	2624	15	coding	549	1650	350	1999	55798745	55806828	FALSE	TRUE	TRUE	Full	34	39	6.68686	0.0331099	F	5	6	7	8	2	8	3	2	3	0	3	2	3	3	0	0	5	5	0	3	7	3	9	2
G10380.17	14	+	2534	15	novel_in_catalog	ENSMUSG00000022214	novel	2624	15	coding	505	1518	324	1841	55798854	55806828	FALSE	TRUE	TRUE	Full	10	39	3.60601	0.0178551	F	0	2	2	2	2	3	0	0	0	0	0	0	0	2	2	0	0	0	3	0	0	0	0	0
G10380.18	14	+	2858	15	novel_in_catalog	ENSMUSG00000022214	novel	2624	15	coding	505	1518	650	2167	55798854	55806828	FALSE	TRUE	TRUE	Full	1	39	3.51337	0.0173964	F	0	0	0	0	0	0	0	0	2	0	0	0	0	0	0	0	0	0	0	0	0	0	0	0
G10380.19	14	+	2544	15	novel_in_catalog	ENSMUSG00000022214	novel	2660	14	coding	549	1650	202	1851	55798745	55806828	FALSE	TRUE	TRUE	Full	12	39	3.98543	0.0197338	F	0	3	0	0	0	2	0	0	0	2	0	0	2	0	0	0	4	0	0	2	0	0	2	0
G10380.20	14	+	2732	15	novel_in_catalog	ENSMUSG00000022214	novel	2660	14	coding	549	1650	392	2041	55798745	55806828	FALSE	TRUE	TRUE	Full	1	39	3.32437	0.0164606	F	0	0	0	0	0	0	0	0	0	0	0	0	0	0	0	0	0	0	0	0	0	0	0	0
G10380.21	14	+	2464	15	novel_in_catalog	ENSMUSG00000022214	novel	2624	15	coding	549	1650	124	1773	55798745	55806828	FALSE	TRUE	TRUE	Full	1	39	3.1072	0.0153852	F	0	0	0	0	0	0	0	0	0	0	0	0	0	0	0	0	0	0	0	0	0	0	0	0
G10380.22	14	+	2490	15	novel_in_catalog	ENSMUSG00000022214	novel	2601	15	coding	549	1650	150	1799	55798745	55806828	FALSE	TRUE	TRUE	Full	1	39	3.33721	0.0165241	F	0	0	0	0	0	0	0	0	0	0	0	0	0	0	0	0	0	0	0	0	0	0	2	0
G10380.23	14	+	2467	15	novel_in_catalog	ENSMUSG00000022214	novel	2601	15	coding	505	1518	258	1775	55798854	55806828	FALSE	TRUE	TRUE	Full	3	39	3.79685	0.0188	F	0	0	0	0	0	0	0	0	3	0	0	0	0	2	0	0	0	0	0	0	0	0	0	0
G10380.24	14	+	2437	15	novel_in_catalog	ENSMUSG00000022214	novel	2601	15	coding	505	1518	227	1744	55798854	55806828	FALSE	TRUE	TRUE	Full	1	39	4.6965	0.0232546	F	0	0	0	0	0	0	0	0	0	0	0	0	2	0	0	0	0	0	0	0	0	0	0	0
G10380.25	14	+	3232	13	novel_in_catalog	ENSMUSG00000022214	novel	2601	15	coding	283	852	262	1113	55798745	55802318	TRUE	TRUE	TRUE	Full	5	39	3.12095	0.0154533	F	0	2	0	2	0	0	0	0	2	0	0	0	0	2	0	0	0	2	0	0	0	0	0	0
G10380.26	14	+	2912	14	novel_in_catalog	ENSMUSG00000022214	novel	2601	15	coding	283	852	260	1111	55798745	55802318	TRUE	TRUE	TRUE	Full	2	39	3.26554	0.0161693	F	0	0	0	0	0	0	0	0	0	0	0	2	0	0	0	0	0	0	0	0	0	0	0	0
G10380.27	14	+	3123	13	novel_in_catalog	ENSMUSG00000022214	novel	2601	15	coding	268	807	256	1062	55798745	55802057	TRUE	TRUE	TRUE	Full	1	39	2.91761	0.0144465	F	0	0	0	0	0	0	0	0	0	0	0	0	0	0	0	0	0	0	0	0	0	0	0	0
G10380.28	14	+	2454	15	novel_in_catalog	ENSMUSG00000022214	novel	2601	15	coding	549	1650	114	1763	55798745	55806828	FALSE	TRUE	TRUE	Full	28	39	6.26384	0.0310153	F	0	0	0	4	4	2	0	2	3	8	0	0	0	3	0	0	5	0	0	0	2	3	0	0
G10380.29	14	+	2566	15	novel_in_catalog	ENSMUSG00000022214	novel	2601	15	coding	505	1518	356	1873	55798854	55806828	FALSE	TRUE	TRUE	Full	27	39	5.75426	0.0284921	F	3	2	5	3	0	3	2	2	4	0	8	5	5	0	3	0	0	0	0	4	3	4	4	2
G10380.30	14	+	2589	15	full-splice_match	ENSMUSG00000022214	ENSMUST00000072530	2601	15	coding	549	1650	247	1896	55798745	55806828	FALSE	TRUE	TRUE	Full	47	39	24.7935	0.122764	T	16	21	16	24	12	14	11	11	36	15	21	17	17	16	12	0	10	17	11	20	19	14	23	13
G10380.31	14	+	2978	13	novel_in_catalog	ENSMUSG00000022214	novel	2660	14	coding	283	852	327	1178	55798745	55802318	TRUE	TRUE	TRUE	Full	5	39	3.30297	0.0163546	F	0	0	0	0	0	2	2	0	0	0	2	0	0	2	0	0	0	0	0	0	0	2	0	0
G10380.32	14	+	2643	14	incomplete-splice_match	ENSMUSG00000022214	ENSMUST00000152681	2624	15	coding	505	1518	433	1950	55798854	55806828	FALSE	TRUE	TRUE	Full	14	39	4.081	0.020207	F	0	0	0	0	0	0	2	0	5	0	0	0	0	0	0	0	2	2	2	0	0	0	4	0
G10380.33	14	+	2983	13	novel_in_catalog	ENSMUSG00000022214	novel	2660	14	coding	283	852	324	1175	55798745	55802627	TRUE	TRUE	TRUE	Full	1	39	3.092	0.01531	F	0	0	0	0	0	0	0	0	0	0	0	0	0	0	0	0	0	0	0	0	0	0	0	0
G10380.34	14	+	2665	14	full-splice_match	ENSMUSG00000022214	ENSMUST00000128490	2660	14	coding	549	1650	323	1972	55798745	55806828	FALSE	TRUE	TRUE	Full	46	39	16.0302	0.0793732	F	9	12	8	14	9	13	7	12	16	15	18	16	6	14	15	5	13	13	7	9	7	11	16	6
G10380.35	14	+	2597	13	full-splice_match	ENSMUSG00000022214	ENSMUST00000143375	2366	13	coding	362	1089	819	1907	55801595	55806828	FALSE	TRUE	TRUE	Full	1	39	3.67691	0.0182062	F	0	0	0	0	0	0	2	0	0	0	0	0	0	0	0	0	0	0	0	0	0	0	0	0
G10380.36	14	+	2474	15	novel_not_in_catalog	ENSMUSG00000022214	novel	2660	14	coding	549	1650	132	1781	55798745	55806828	FALSE	TRUE	TRUE	Full	1	39	4.79631	0.0237488	F	0	0	0	0	0	0	0	0	0	0	0	0	0	0	0	0	0	3	0	0	0	0	0	0
G10380.37	14	+	3279	12	novel_in_catalog	ENSMUSG00000022214	novel	2660	14	coding	283	852	315	1166	55798745	55802318	TRUE	TRUE	TRUE	Full	1	39	3.59279	0.0177896	F	0	0	0	0	0	0	0	0	0	0	2	0	0	0	0	0	0	0	0	0	0	0	0	0
G10380.38	14	+	2061	12	incomplete-splice_match	ENSMUSG00000022214	ENSMUST00000128490	2660	14	coding	416	1251	118	1368	55800945	55806828	FALSE	TRUE	TRUE	Full	6	39	3.45543	0.0171095	F	0	0	0	0	0	0	0	0	0	0	0	0	0	0	0	0	2	0	0	0	2	0	0	0
G10380.4	14	+	2822	16	novel_in_catalog	ENSMUSG00000022214	novel	2593	15	coding	505	1518	612	2129	55798854	55806828	FALSE	TRUE	TRUE	Full	15	39	4.16237	0.0206099	F	0	0	0	0	0	2	0	0	2	2	2	2	0	0	2	0	3	2	0	3	0	0	7	0
G10380.40	14	+	1566	7	incomplete-splice_match	ENSMUSG00000022214	ENSMUST00000128490	2660	14	coding	210	633	241	873	55803205	55806828	FALSE	TRUE	TRUE	Full	1	39	4.4542	0.0220549	F	0	0	0	0	0	0	0	0	0	0	0	0	0	0	0	0	0	0	0	0	0	0	0	0
G10380.41	14	+	1392	5	incomplete-splice_match	ENSMUSG00000022214	ENSMUST00000153638	4413	12	coding	210	633	69	701	55803205	55806828	FALSE	TRUE	TRUE	Full	2	39	3.42649	0.0169662	F	0	0	0	0	0	0	2	0	0	0	0	0	0	0	0	0	0	0	2	0	0	0	0	0
G10380.42	14	+	1081	3	incomplete-splice_match	ENSMUSG00000022214	ENSMUST00000145983	601	5	coding	121	366	25	390	55804743	55806828	FALSE	TRUE	TRUE	Full	1	39	3.01633	0.0149353	F	0	0	0	0	0	0	0	0	0	0	0	0	0	0	0	0	0	0	0	0	0	0	0	0
G10380.5	14	+	2845	16	novel_in_catalog	ENSMUSG00000022214	novel	2593	15	coding	549	1650	503	2152	55798745	55806828	FALSE	TRUE	TRUE	Full	9	39	4.43876	0.0219785	F	0	0	0	0	0	0	0	0	3	0	3	2	0	2	0	0	5	0	0	0	2	0	3	0
G10380.6	14	+	2687	16	novel_in_catalog	ENSMUSG00000022214	novel	2593	15	coding	505	1518	477	1994	55798854	55806828	FALSE	TRUE	TRUE	Full	2	39	3.40145	0.0168422	F	0	0	0	0	0	2	0	0	0	0	0	0	0	0	0	0	2	0	0	0	0	0	0	0
G10380.7	14	+	2711	16	novel_in_catalog	ENSMUSG00000022214	novel	2538	15	coding	549	1650	368	2017	55798745	55806828	FALSE	TRUE	TRUE	Full	3	39	3.37528	0.0167126	F	0	0	0	0	0	0	0	0	0	0	0	2	0	0	0	0	2	0	0	0	0	0	0	0
G10380.8	14	+	2635	15	full-splice_match	ENSMUSG00000022214	ENSMUST00000150019	2593	15	coding	505	1518	425	1942	55798854	55806828	FALSE	TRUE	TRUE	Full	25	39	6.76745	0.0335089	F	4	6	0	6	2	3	2	0	6	0	0	0	0	2	0	0	0	3	0	8	0	0	3	3
G10380.9	14	+	2658	15	novel_in_catalog	ENSMUSG00000022214	novel	2593	15	coding	549	1650	316	1965	55798745	55806828	FALSE	TRUE	TRUE	Full	35	39	6.08579	0.0301337	F	0	2	3	6	0	0	4	0	4	4	3	4	2	5	4	4	3	6	0	9	3	0	4	4
G10381.1	14	+	1109	12	full-splice_match	ENSMUSG00000022216	ENSMUST00000174484	882	12	coding	249	750	214	963	55816032	55818838	FALSE	TRUE	TRUE	Full	25	21	7.88349	0.0392331	F	0	0	4	0	0	5	0	0	2	5	2	0	0	0	2	6	0	0	4	7	4	8	2	8
G10381.10	14	+	1031	11	novel_not_in_catalog	ENSMUSG00000022216	novel	1112	11	non_coding	NA	NA	NA	NA	NA	NA	NA	TRUE	TRUE	Full	3	21	4.36139	0.021705	F	0	0	0	0	0	0	0	2	0	0	0	0	0	0	0	0	0	0	0	0	0	0	0	0
G10381.11	14	+	369	4	incomplete-splice_match	ENSMUSG00000022216	ENSMUST00000174791	1092	9	coding	82	246	124	369	55816032	55817498	FALSE	TRUE	FALSE	Full	8	21	4.44511	0.0221216	F	0	0	0	3	0	0	2	0	0	0	0	0	0	0	0	0	0	0	5	0	3	3	0	0
G10381.12	14	+	1067	11	novel_in_catalog	ENSMUSG00000022216	novel	1112	11	coding	106	321	124	444	55816032	55817767	TRUE	TRUE	TRUE	Full	1	21	3.46801	0.017259	F	0	0	0	0	0	0	0	0	0	0	0	0	0	0	0	0	0	0	0	0	0	0	0	0
G10381.13	14	+	1231	10	novel_in_catalog	ENSMUSG00000022216	novel	1112	11	coding	106	321	124	444	55816032	55817767	TRUE	TRUE	TRUE	Full	2	21	3.5459	0.0176466	F	0	0	0	0	0	0	0	0	0	0	0	0	0	0	0	0	0	0	0	0	0	0	0	0
G10381.14	14	+	995	11	novel_not_in_catalog	ENSMUSG00000022216	novel	1112	11	coding	241	726	124	849	55816032	55818838	FALSE	TRUE	TRUE	Full	2	21	4.49858	0.0223877	F	0	0	0	0	0	0	0	0	0	0	0	0	0	0	0	3	0	0	0	0	0	0	0	0
G10381.15	14	+	1181	10	incomplete-splice_match	ENSMUSG00000022216	ENSMUST00000174259	1112	11	coding	252	759	124	882	55816032	55818685	FALSE	TRUE	TRUE	Full	15	21	5.98895	0.0298047	F	0	0	0	0	0	0	3	2	0	0	3	0	2	0	2	0	0	0	0	0	0	0	0	0
G10381.16	14	+	1091	10	novel_in_catalog	ENSMUSG00000022216	novel	1112	11	coding	93	282	124	405	55816032	55817534	TRUE	TRUE	TRUE	Full	6	21	4.59891	0.022887	F	0	0	0	0	0	0	0	0	0	2	0	0	0	0	0	0	0	0	0	0	0	0	0	0
G10381.17	14	+	1520	7	novel_in_catalog	ENSMUSG00000022216	novel	1112	11	coding	82	249	124	372	55816032	55817404	TRUE	TRUE	TRUE	Full	1	21	3.69006	0.018364	F	0	0	0	0	0	0	0	0	0	0	0	0	0	0	0	0	0	0	0	0	0	0	0	0
G10381.18	14	+	956	10	novel_in_catalog	ENSMUSG00000022216	novel	1112	11	coding	228	687	124	810	55816032	55818838	FALSE	TRUE	TRUE	Full	1	21	2.97518	0.0148063	F	0	0	0	0	0	0	0	0	0	0	0	0	0	0	0	0	0	0	0	0	0	0	0	0
G10381.19	14	+	1106	10	novel_not_in_catalog	ENSMUSG00000022216	novel	1112	11	coding	93	282	119	400	55816032	55817534	TRUE	TRUE	TRUE	Full	1	21	4.64569	0.0231198	F	0	3	0	0	0	0	0	0	0	0	0	0	0	0	0	0	0	0	0	0	0	0	0	0
G10381.2	14	+	1063	12	novel_not_in_catalog	ENSMUSG00000022216	novel	882	12	non_coding	NA	NA	NA	NA	NA	NA	NA	TRUE	TRUE	Full	1	21	3.19754	0.0159129	F	0	0	0	0	0	0	0	0	0	0	0	0	0	0	0	0	0	2	0	0	0	0	0	0
G10381.21	14	+	1256	9	novel_in_catalog	ENSMUSG00000022216	novel	1112	11	coding	82	249	102	350	55816032	55817404	TRUE	TRUE	TRUE	Full	1	21	5.47954	0.0272696	F	0	0	0	0	0	0	0	0	0	0	0	0	0	0	0	0	0	0	0	0	0	0	0	0
G10381.22	14	+	1571	6	novel_in_catalog	ENSMUSG00000022216	novel	1092	9	coding	82	249	102	350	55816032	55817404	TRUE	TRUE	TRUE	Full	1	21	2.97518	0.0148063	F	0	0	0	0	0	0	0	0	0	0	0	0	0	0	0	0	0	0	0	0	0	0	0	0
G10381.24	14	+	913	10	novel_not_in_catalog	ENSMUSG00000022216	novel	1112	11	non_coding	NA	NA	NA	NA	NA	NA	NA	TRUE	TRUE	Full	1	21	5.43208	0.0270334	F	0	0	0	0	0	0	0	0	0	0	0	0	0	0	0	0	0	0	0	0	0	0	0	0
G10381.26	14	+	685	8	incomplete-splice_match	ENSMUSG00000022216	ENSMUST00000174259	1112	11	coding	90	273	267	539	55818219	55818838	FALSE	TRUE	TRUE	Full	1	21	3.62379	0.0180342	F	0	0	0	0	0	0	0	0	0	0	0	0	0	0	0	0	0	0	0	0	0	0	0	0
G10381.4	14	+	1186	11	full-splice_match	ENSMUSG00000022216	ENSMUST00000174259	1112	11	coding	249	750	291	1040	55816032	55818838	FALSE	TRUE	TRUE	Full	48	21	117.711	0.585804	T	34	36	58	50	71	62	84	92	36	59	36	46	41	82	84	122	68	79	144	93	92	88	66	68
G10381.5	14	+	1016	12	novel_not_in_catalog	ENSMUSG00000022216	novel	1112	11	coding	249	750	121	870	55816032	55818838	FALSE	TRUE	TRUE	Full	1	21	2.75893	0.0137301	F	0	0	0	0	0	0	0	0	0	0	0	0	0	0	0	0	0	0	0	0	0	0	0	0
G10381.6	14	+	1262	9	novel_in_catalog	ENSMUSG00000022216	novel	1112	11	non_coding	NA	NA	NA	NA	NA	NA	NA	TRUE	TRUE	Full	2	21	3.08951	0.0153753	F	0	0	2	0	0	0	0	0	0	0	0	0	0	0	0	0	0	0	0	0	0	0	0	0
G10381.8	14	+	1689	6	novel_in_catalog	ENSMUSG00000022216	novel	1112	11	non_coding	NA	NA	NA	NA	NA	NA	NA	TRUE	TRUE	Full	1	21	2.91761	0.0145198	F	0	0	0	0	0	0	0	0	0	0	0	0	0	0	0	0	0	0	0	0	0	0	0	0
G10381.9	14	+	1436	8	novel_in_catalog	ENSMUSG00000022216	novel	1112	11	non_coding	NA	NA	NA	NA	NA	NA	NA	TRUE	TRUE	Full	1	21	3.65303	0.0181797	F	0	0	0	0	0	0	0	0	0	0	0	0	0	0	0	0	0	0	0	0	0	0	0	0
G10382.1	14	-	532	6	novel_not_in_catalog	ENSMUSG00000022217	novel	855	5	coding	148	447	44	490	55822392	55819020	FALSE	TRUE	TRUE	Full	4	11	7.28578	0.0714726	F	0	0	0	0	0	0	0	0	0	0	0	0	0	0	0	0	0	0	0	0	0	0	0	0
G10382.10	14	-	1038	4	novel_in_catalog	ENSMUSG00000022217	novel	855	5	coding	147	444	239	682	55822566	55819334	FALSE	TRUE	TRUE	Full	1	11	3.46801	0.0340207	F	0	0	0	0	0	0	0	0	0	0	0	0	0	0	0	0	0	0	0	0	0	0	0	0
G10382.12	14	-	3604	2	full-splice_match	ENSMUSG00000022217	ENSMUST00000174618	1682	2	coding	174	525	2459	2983	55820123	55819599	FALSE	TRUE	TRUE	Full	1	11	3.31681	0.0325375	F	2	0	0	0	0	0	0	0	0	0	0	0	0	0	0	0	0	0	0	0	0	0	0	0
G10382.14	14	-	533	5	novel_not_in_catalog	ENSMUSG00000022217	novel	855	5	coding	92	279	214	492	55819515	55819020	FALSE	TRUE	TRUE	Full	1	11	3.78186	0.0370996	F	0	0	0	0	0	0	0	0	0	0	0	0	0	0	0	2	0	0	0	0	0	0	0	0
G10382.2	14	-	856	5	full-splice_match	ENSMUSG00000022217	ENSMUST00000022828	855	5	coding	206	621	194	814	55822566	55819020	FALSE	TRUE	TRUE	Full	48	11	49.0879	0.481546	T	24	22	20	33	22	18	34	77	14	19	15	21	23	35	39	76	20	12	58	38	26	32	15	16
G10382.3	14	-	490	5	novel_not_in_catalog	ENSMUSG00000022217	novel	855	5	coding	92	279	170	448	55819515	55819020	FALSE	TRUE	TRUE	Full	4	11	13.5494	0.132918	F	0	0	0	0	0	0	0	0	0	0	0	0	0	0	0	0	0	0	0	0	0	0	0	0
G10382.4	14	-	1019	5	novel_not_in_catalog	ENSMUSG00000022217	novel	855	5	non_coding	NA	NA	NA	NA	NA	NA	NA	TRUE	TRUE	Full	6	11	3.21743	0.0315626	F	0	0	0	0	0	0	0	0	0	0	0	0	0	0	0	0	2	0	0	0	2	2	0	0
G10382.5	14	-	686	5	novel_not_in_catalog	ENSMUSG00000022217	novel	855	5	non_coding	NA	NA	NA	NA	NA	NA	NA	TRUE	TRUE	Full	2	11	4.17912	0.0409966	F	0	0	0	0	0	0	0	0	0	0	0	0	0	0	0	0	0	0	0	0	0	0	0	0
G10382.6	14	-	3462	4	novel_in_catalog	ENSMUSG00000022217	novel	855	5	coding	174	525	2534	3058	55820123	55819599	TRUE	TRUE	TRUE	Full	1	11	5.5351	0.0542986	F	0	0	0	0	0	0	0	0	0	0	0	0	0	0	0	0	0	0	0	0	0	0	0	0
G10382.7	14	-	868	4	novel_in_catalog	ENSMUSG00000022217	novel	855	5	non_coding	NA	NA	NA	NA	NA	NA	NA	TRUE	TRUE	Full	2	11	3.25862	0.0319666	F	0	0	0	0	0	0	0	0	0	0	0	0	0	0	0	0	0	0	0	0	0	0	0	0
G10382.8	14	-	691	3	full-splice_match	ENSMUSG00000022217	ENSMUST00000174352	340	3	coding	151	456	194	649	55822566	55819020	FALSE	TRUE	TRUE	Full	21	11	5.25811	0.0515814	F	0	0	0	0	0	0	2	0	0	0	0	0	0	4	2	2	3	0	13	2	0	0	2	2
G10383.1	14	-	1245	11	full-splice_match	ENSMUSG00000079197	ENSMUST00000111378	795	11	coding	231	696	507	1202	55828502	55824942	FALSE	TRUE	TRUE	Full	47	8	16.3023	0.215662	F	7	7	8	7	12	8	14	13	7	6	5	4	3	10	12	19	6	9	16	9	18	10	8	8
G10383.2	14	-	1804	10	incomplete-splice_match	ENSMUSG00000079197	ENSMUST00000111378	795	11	coding	162	489	1273	1761	55826968	55824942	FALSE	TRUE	TRUE	Full	10	8	4.15017	0.0549021	F	0	0	0	0	0	0	0	0	0	0	2	2	0	0	0	2	2	0	0	0	0	3	0	0
G10383.3	14	-	1152	10	novel_in_catalog	ENSMUSG00000079197	novel	962	11	coding	162	489	621	1109	55826968	55824942	FALSE	TRUE	TRUE	Full	1	8	3.78186	0.0500298	F	0	0	0	0	0	0	0	0	0	0	0	0	0	0	0	2	0	0	0	0	0	0	0	0
G10383.4	14	-	1142	10	novel_in_catalog	ENSMUSG00000079197	novel	795	11	coding	162	489	611	1099	55826968	55824942	FALSE	TRUE	TRUE	Full	1	8	3.17608	0.042016	F	0	0	0	0	0	0	0	0	0	0	0	0	0	0	0	0	0	0	2	0	0	0	0	0
G10383.5	14	-	1002	9	novel_in_catalog	ENSMUSG00000079197	novel	962	11	non_coding	NA	NA	NA	NA	NA	NA	NA	TRUE	TRUE	Full	1	8	3.77923	0.049995	F	0	0	0	0	0	0	0	0	0	0	0	0	0	0	0	0	0	0	0	0	0	0	0	0
G10383.6	14	-	954	11	full-splice_match	ENSMUSG00000079197	ENSMUST00000161807	962	11	coding	239	720	194	913	55828346	55824942	FALSE	TRUE	TRUE	Full	48	8	37.8658	0.500923	T	18	16	13	23	27	20	17	34	15	10	17	26	22	29	30	44	22	17	42	23	26	22	23	14
G10383.7	14	-	1230	11	novel_not_in_catalog	ENSMUSG00000079197	novel	795	11	coding	227	684	507	1190	55828502	55824942	FALSE	TRUE	TRUE	Full	5	8	3.05107	0.0403623	F	2	0	2	2	0	0	0	0	0	0	0	0	0	0	0	0	0	0	0	0	0	0	0	0
G10383.9	14	-	883	10	novel_in_catalog	ENSMUSG00000079197	novel	962	11	coding	105	318	45	362	55828346	55826882	TRUE	TRUE	TRUE	Full	1	8	3.4856	0.0461107	F	0	0	0	0	0	0	0	0	0	2	0	0	0	0	0	0	0	0	0	0	0	0	0	0
G10384.1	14	+	3439	21	full-splice_match	ENSMUSG00000047098	ENSMUST00000019443	3485	21	coding	1066	3201	152	3352	55829341	55841042	FALSE	TRUE	TRUE	Full	5	2	3.24299	0.424766	F	0	2	2	0	0	0	0	0	0	0	0	0	0	0	0	0	2	2	0	0	0	0	2	0
G10384.4	14	+	1375	11	incomplete-splice_match	ENSMUSG00000047098	ENSMUST00000140178	2817	20	coding	362	1089	202	1290	55836095	55841042	FALSE	TRUE	TRUE	Full	2	2	4.39178	0.575234	T	0	0	0	0	0	0	0	0	0	0	0	0	0	0	0	0	3	0	0	0	0	0	0	0
G10385.11	14	+	2363	9	full-splice_match	ENSMUSG00000002325	ENSMUST00000138037	2343	9	coding	417	1254	113	1366	55842126	55846488	FALSE	TRUE	TRUE	Full	1	7	3.4856	0.0816526	F	0	0	0	0	0	0	0	0	0	2	0	0	0	0	0	0	0	0	0	0	0	0	0	0
G10385.4	14	+	2333	10	full-splice_match	ENSMUSG00000002325	ENSMUST00000134863	2959	10	coding	404	1215	121	1335	55841997	55846488	FALSE	TRUE	TRUE	Full	18	7	6.27231	0.146933	F	0	3	0	2	0	3	0	0	6	5	2	0	5	0	0	0	0	0	0	0	0	0	2	2
G10385.5	14	+	1778	9	full-splice_match	ENSMUSG00000002325	ENSMUST00000130697	2459	9	coding	399	1200	50	1249	55842510	55846488	FALSE	TRUE	TRUE	Full	14	7	5.01795	0.117549	F	0	0	0	0	0	0	2	0	3	0	10	2	2	0	2	0	0	0	0	0	0	0	2	0
G10385.6	14	+	1945	9	full-splice_match	ENSMUSG00000002325	ENSMUST00000130697	2459	9	coding	399	1200	50	1249	55842510	55846488	FALSE	TRUE	TRUE	Full	1	7	3.59279	0.0841635	F	0	0	0	0	0	0	0	0	0	0	2	0	0	0	0	0	0	0	0	0	0	0	0	0
G10385.7	14	+	2246	9	full-splice_match	ENSMUSG00000002325	ENSMUST00000130697	2459	9	coding	399	1200	50	1249	55842510	55846488	FALSE	TRUE	TRUE	Full	47	7	18.1941	0.42621	T	13	12	4	13	8	8	9	4	37	25	66	15	10	5	31	5	4	8	2	3	6	10	29	9
G10385.8	14	+	2131	8	novel_in_catalog	ENSMUSG00000002325	novel	2459	9	coding	368	1107	50	1156	55842510	55846511	FALSE	TRUE	TRUE	Full	1	7	3.20782	0.0751453	F	0	0	0	0	0	0	0	0	0	0	0	0	0	0	2	0	0	0	0	0	0	0	0	0
G10385.9	14	+	2586	7	novel_in_catalog	ENSMUSG00000002325	novel	2459	9	coding	152	459	1130	1588	55845081	55846488	FALSE	TRUE	TRUE	Full	1	7	2.91761	0.068347	F	0	0	0	0	0	0	0	0	0	0	0	0	0	0	0	0	0	0	0	0	0	0	0	0
G10387.11	14	-	3529	30	full-splice_match	ENSMUSG00000002319	ENSMUST00000047131	3846	30	coding	1082	3249	92	3340	55873055	55863368	FALSE	TRUE	TRUE	Full	28	6	10.2143	0.341845	T	16	17	10	3	0	0	0	0	6	2	10	0	0	0	0	0	11	11	0	2	9	2	8	6
G10387.17	14	-	3354	29	novel_in_catalog	ENSMUSG00000002319	novel	3846	30	coding	882	2649	519	3167	55871222	55863368	FALSE	TRUE	TRUE	Full	1	6	3.31681	0.111005	F	2	0	0	0	0	0	0	0	0	0	0	0	0	0	0	0	0	0	0	0	0	0	0	0
G10387.19	14	-	1202	8	incomplete-splice_match	ENSMUSG00000002319	ENSMUST00000047131	3846	30	coding	329	990	28	1017	55866418	55863368	FALSE	TRUE	TRUE	Full	1	6	4.6965	0.157179	F	0	0	0	0	0	0	0	0	0	0	0	0	2	0	0	0	0	0	0	0	0	0	0	0
G10387.20	14	-	3489	29	novel_not_in_catalog	ENSMUSG00000002319	novel	3846	30	coding	963	2892	433	3324	55871787	55863368	FALSE	TRUE	TRUE	Full	1	6	3.3374	0.111694	F	0	0	0	0	0	0	0	0	0	0	0	0	0	0	0	0	0	0	0	0	0	0	0	0
G10387.4	14	-	3570	30	full-splice_match	ENSMUSG00000002319	ENSMUST00000047131	3846	30	coding	1082	3249	45	3293	55873055	55863368	FALSE	TRUE	TRUE	Full	9	6	4.80614	0.160849	F	4	3	0	0	0	0	0	0	3	0	2	0	0	0	0	0	5	0	0	2	2	0	3	0
G10387.6	14	-	492	3	incomplete-splice_match	ENSMUSG00000002319	ENSMUST00000148351	3474	29	coding	87	264	37	300	55864859	55863368	FALSE	TRUE	TRUE	Full	1	6	3.50876	0.117429	F	0	0	0	0	0	0	0	2	0	0	0	0	0	0	0	0	0	0	0	0	0	0	0	0
G10388.1	14	-	2364	6	novel_not_in_catalog	ENSMUSG00000002320	novel	2517	6	coding	458	1377	230	1606	55880395	55875427	TRUE	TRUE	TRUE	Full	1	15	3.36131	0.0457242	F	0	0	0	0	2	0	0	0	0	0	0	0	0	0	0	0	0	0	0	0	0	0	0	0
G10388.11	14	-	2497	5	full-splice_match	ENSMUSG00000002320	ENSMUST00000002391	2382	5	coding	606	1821	434	2254	55880395	55873676	FALSE	TRUE	TRUE	Full	47	15	19.7302	0.268391	T	21	16	18	15	14	20	14	9	15	16	11	14	8	11	13	2	13	7	3	6	10	4	7	7
G10388.12	14	-	2169	5	novel_in_catalog	ENSMUSG00000002320	novel	2382	5	coding	505	1518	409	1926	55880395	55873676	FALSE	TRUE	TRUE	Full	8	15	4.17089	0.056737	F	0	0	0	0	0	0	0	0	3	0	0	0	0	0	2	0	0	0	0	0	0	0	4	0
G10388.13	14	-	2179	6	novel_not_in_catalog	ENSMUSG00000002320	novel	2148	6	coding	458	1377	55	1431	55880395	55875427	TRUE	TRUE	TRUE	Full	1	15	3.15622	0.0429344	F	0	0	0	0	0	0	0	0	0	0	0	0	0	0	0	0	0	0	0	0	0	0	0	0
G10388.14	14	-	2558	5	novel_not_in_catalog	ENSMUSG00000002320	novel	2382	5	coding	458	1377	434	1810	55880395	55875427	TRUE	TRUE	TRUE	Full	12	15	3.44611	0.0468777	F	2	0	0	2	2	0	0	0	0	0	0	0	0	2	0	0	0	0	0	0	0	3	2	0
G10388.15	14	-	2308	5	novel_not_in_catalog	ENSMUSG00000002320	novel	2398	5	coding	503	1512	409	1920	55880395	55873821	FALSE	TRUE	TRUE	Full	1	15	2.97518	0.0404716	F	0	0	0	0	0	0	0	0	0	0	0	0	0	0	0	0	0	0	0	0	0	0	0	0
G10388.16	14	-	2431	5	full-splice_match	ENSMUSG00000002320	ENSMUST00000002391	2382	5	coding	606	1821	434	2254	55880395	55873676	FALSE	TRUE	TRUE	Full	13	15	3.61176	0.0491311	F	2	3	0	0	0	2	0	0	0	0	0	0	0	2	0	0	2	2	0	0	0	0	0	2
G10388.17	14	-	2185	6	full-splice_match	ENSMUSG00000002320	ENSMUST00000120041	2164	6	coding	606	1821	210	2030	55880395	55873676	FALSE	TRUE	TRUE	Full	1	15	3.32437	0.0452217	F	0	0	0	0	0	0	0	0	0	0	0	0	0	0	0	0	0	0	0	0	0	0	0	0
G10388.2	14	-	1974	6	novel_not_in_catalog	ENSMUSG00000002320	novel	2164	6	coding	387	1164	265	1428	55880134	55873969	FALSE	TRUE	TRUE	Full	1	15	3.14531	0.0427859	F	0	0	0	0	0	0	0	0	0	0	0	0	0	0	0	0	0	0	0	0	0	0	0	0
G10388.3	14	-	1988	6	novel_not_in_catalog	ENSMUSG00000002320	novel	2148	6	coding	519	1560	183	1742	55880134	55873676	FALSE	TRUE	TRUE	Full	1	15	3.20782	0.0436362	F	0	0	0	0	0	0	0	0	0	0	0	0	0	0	2	0	0	0	0	0	0	0	0	0
G10388.5	14	-	2323	6	novel_in_catalog	ENSMUSG00000002320	novel	2164	6	coding	606	1821	260	2080	55880395	55873676	FALSE	TRUE	TRUE	Full	9	15	4.50999	0.0613498	F	0	0	0	2	6	5	0	0	0	2	0	0	0	2	0	0	0	0	0	0	0	0	0	0
G10388.6	14	-	2273	6	full-splice_match	ENSMUSG00000002320	ENSMUST00000120041	2164	6	coding	606	1821	210	2030	55880395	55873676	FALSE	TRUE	TRUE	Full	28	15	4.79335	0.0652044	F	2	0	2	4	3	3	3	0	3	3	0	2	0	2	2	2	0	2	0	0	0	2	0	0
G10388.7	14	-	2191	6	novel_not_in_catalog	ENSMUSG00000002320	novel	2148	6	coding	606	1821	128	1948	55880395	55873676	FALSE	TRUE	TRUE	Full	23	15	5.52428	0.0751472	F	5	4	4	0	3	2	0	0	0	4	7	0	0	2	5	0	2	0	5	4	0	0	3	0
G10388.8	14	-	2294	6	full-splice_match	ENSMUSG00000002320	ENSMUST00000122358	2517	6	coding	606	1821	231	2051	55880395	55873676	FALSE	TRUE	TRUE	Full	20	15	4.49608	0.0611605	F	0	2	0	3	0	2	3	3	0	0	0	0	0	0	0	0	0	0	0	0	0	3	0	0
G10388.9	14	-	2235	6	novel_in_catalog	ENSMUSG00000002320	novel	2517	6	coding	606	1821	172	1992	55880395	55873676	FALSE	TRUE	TRUE	Full	10	15	4.0599	0.0552271	F	2	0	0	3	0	0	0	0	3	2	0	2	0	0	2	0	0	0	2	0	0	0	0	0
G1039.1	1	-	1807	10	novel_not_in_catalog	ENSMUSG00000070034	novel	2583	3	coding	352	1059	177	1235	85523829	85499039	FALSE	TRUE	TRUE	Full	4	5	4.57268	0.190514	F	0	0	0	0	0	0	0	0	0	0	0	0	0	0	0	0	0	0	0	0	0	0	0	0
G1039.2	1	-	1871	12	full-splice_match	ENSMUSG00000070034	ENSMUST00000093508	1921	12	coding	445	1338	177	1514	85523829	85505013	FALSE	TRUE	TRUE	Full	17	5	5.89439	0.245582	F	0	0	0	0	0	6	0	0	2	5	4	0	0	0	8	2	2	4	4	6	3	3	4	0
G1039.3	1	-	1883	12	novel_not_in_catalog	ENSMUSG00000070034	novel	1921	12	coding	449	1350	177	1526	85523829	85505013	FALSE	TRUE	TRUE	Full	2	5	6.45319	0.268863	T	0	0	0	0	0	0	0	0	2	0	0	0	4	0	0	0	0	0	0	0	0	0	0	0
G1039.4	1	-	1254	9	novel_not_in_catalog	ENSMUSG00000070034	novel	1921	12	coding	236	711	188	898	85516865	85505013	FALSE	TRUE	TRUE	Full	1	5	3.61348	0.150551	F	0	0	0	0	0	0	0	0	0	0	0	2	0	0	0	0	0	0	0	0	0	0	0	0
G1039.6	1	-	2148	10	novel_in_catalog	ENSMUSG00000070034	novel	2293	11	coding	336	1011	169	1179	85523829	85507345	TRUE	TRUE	TRUE	Full	1	5	3.46801	0.14449	F	0	0	0	0	0	0	0	0	0	0	0	0	0	0	0	0	0	0	0	0	0	0	0	0
G10390.10	14	-	1632	6	full-splice_match	ENSMUSG00000002329	ENSMUST00000002400	1733	6	coding	164	495	49	543	55897831	55896440	FALSE	TRUE	TRUE	Full	48	12	63.0765	0.394124	T	19	40	21	33	44	43	32	43	34	37	28	33	28	27	30	23	43	49	35	49	34	49	39	25
G10390.11	14	-	1647	6	novel_not_in_catalog	ENSMUSG00000002329	novel	1733	6	non_coding	NA	NA	NA	NA	NA	NA	NA	TRUE	TRUE	Full	1	12	2.97518	0.01859	F	0	0	0	0	0	0	0	0	0	0	0	0	0	0	0	0	0	0	0	0	0	0	0	0
G10390.12	14	-	1701	5	full-splice_match	ENSMUSG00000002329	ENSMUST00000226659	1730	5	coding	113	342	164	505	55897607	55896672	FALSE	TRUE	TRUE	Full	48	12	57.0302	0.356345	F	25	31	36	34	45	38	15	30	21	25	25	48	36	41	45	29	41	36	55	31	53	41	38	30
G10390.13	14	-	1812	5	novel_in_catalog	ENSMUSG00000002329	novel	1733	6	coding	151	456	104	559	55897831	55896604	FALSE	TRUE	TRUE	Full	1	12	3.46801	0.0216693	F	0	0	0	0	0	0	0	0	0	0	0	0	0	0	0	0	0	0	0	0	0	0	0	0
G10390.14	14	-	1576	7	novel_not_in_catalog	ENSMUSG00000002329	novel	1733	6	coding	164	495	49	543	55897831	55896440	TRUE	TRUE	TRUE	Full	1	12	2.85755	0.017855	F	0	0	0	0	0	0	0	0	0	0	0	0	0	0	0	0	0	0	0	2	0	0	0	0
G10390.15	14	-	657	6	full-splice_match	ENSMUSG00000002329	ENSMUST00000002400	1733	6	coding	164	495	49	543	55897831	55896440	FALSE	TRUE	TRUE	Full	30	12	5.70985	0.0356771	F	0	3	0	3	5	0	3	2	4	0	4	0	3	3	0	5	4	0	6	5	2	0	2	0
G10390.16	14	-	726	5	full-splice_match	ENSMUSG00000002329	ENSMUST00000226659	1730	5	coding	113	342	164	505	55897607	55896672	FALSE	TRUE	TRUE	Full	26	12	5.16271	0.0322584	F	3	0	0	0	0	3	0	2	3	2	0	0	0	0	0	3	0	2	3	4	0	0	0	2
G10390.4	14	-	1732	5	novel_not_in_catalog	ENSMUSG00000002329	novel	1730	5	coding	113	342	194	535	55897607	55896672	FALSE	TRUE	TRUE	Full	3	12	4.09924	0.0256135	F	0	0	0	0	0	0	0	0	0	0	0	0	0	0	0	0	0	0	0	0	0	0	3	0
G10390.5	14	-	1692	4	incomplete-splice_match	ENSMUSG00000002329	ENSMUST00000226659	1730	5	coding	113	342	154	495	55897607	55896672	FALSE	TRUE	TRUE	Full	20	12	4.59681	0.0287225	F	0	0	0	0	2	0	0	0	2	0	4	0	2	0	0	0	4	2	0	2	4	0	0	3
G10390.6	14	-	1402	3	incomplete-splice_match	ENSMUSG00000002329	ENSMUST00000226659	1730	5	coding	47	144	169	312	55896708	55896440	FALSE	TRUE	TRUE	Full	6	12	3.77927	0.0236142	F	2	0	0	0	0	0	0	2	0	3	0	0	0	3	0	0	0	0	0	0	0	2	0	0
G10390.7	14	-	2257	4	novel_in_catalog	ENSMUSG00000002329	novel	1730	5	coding	139	420	748	1167	55897068	55896440	FALSE	TRUE	TRUE	Full	3	12	3.63281	0.0226991	F	0	0	0	0	2	0	0	0	0	0	0	0	0	0	0	0	0	0	0	0	0	0	2	0
G10390.9	14	-	1827	4	novel_in_catalog	ENSMUSG00000002329	novel	1730	5	coding	113	342	164	505	55897607	55896672	FALSE	TRUE	TRUE	Full	7	12	3.65401	0.0228316	F	0	0	0	0	0	0	0	2	0	0	0	0	0	0	0	0	0	0	0	0	0	0	0	0
G10391.1	14	-	659	4	full-splice_match	ENSMUSG00000010376	ENSMUST00000228414	516	4	non_coding	NA	NA	NA	NA	NA	NA	NA	TRUE	TRUE	Full	13	3	6.29922	0.0286351	F	0	0	0	0	0	0	0	0	0	0	0	2	0	0	0	2	0	0	0	0	0	0	0	0
G10391.2	14	-	1386	3	novel_in_catalog	ENSMUSG00000010376	novel	824	4	non_coding	NA	NA	NA	NA	NA	NA	NA	TRUE	TRUE	Full	6	3	5.72927	0.0260442	F	0	0	2	0	0	0	0	0	0	0	0	0	0	0	0	0	0	0	0	0	0	0	0	0
G10391.4	14	-	795	4	full-splice_match	ENSMUSG00000010376	ENSMUST00000010520	824	4	non_coding	NA	NA	NA	NA	NA	NA	NA	TRUE	TRUE	Full	48	3	207.954	0.945321	T	97	70	104	161	118	89	98	194	95	75	60	100	112	153	146	255	84	81	236	154	145	123	62	70
G10393.10	14	+	1491	10	full-splice_match	ENSMUSG00000002326	ENSMUST00000002397	1993	10	coding	348	1047	117	1163	55910172	55915870	FALSE	TRUE	TRUE	Full	48	17	63.3421	0.477065	T	31	30	23	26	28	21	30	21	30	35	26	22	22	45	38	23	37	46	62	37	32	48	38	38
G10393.11	14	+	1308	8	novel_in_catalog	ENSMUSG00000002326	novel	1993	10	coding	285	858	117	974	55910172	55915870	FALSE	TRUE	TRUE	Full	2	17	4.10494	0.0309166	F	0	0	0	0	0	0	0	0	2	0	0	0	2	0	0	0	0	0	0	0	0	0	0	0
G10393.12	14	+	2604	8	novel_in_catalog	ENSMUSG00000002326	novel	1993	10	coding	163	492	117	608	55910172	55913216	TRUE	TRUE	TRUE	Full	1	17	3.1627	0.0238201	F	0	0	2	0	0	0	0	0	0	0	0	0	0	0	0	0	0	0	0	0	0	0	0	0
G10393.13	14	+	2784	7	novel_in_catalog	ENSMUSG00000002326	novel	1993	10	coding	163	492	117	608	55910172	55913216	TRUE	TRUE	TRUE	Full	4	17	3.21607	0.024222	F	2	2	0	0	0	0	0	0	0	0	2	0	0	0	0	0	0	0	0	2	0	0	0	0
G10393.15	14	+	1395	9	novel_in_catalog	ENSMUSG00000002326	novel	1993	10	coding	305	918	150	1067	55910449	55915870	FALSE	TRUE	TRUE	Full	5	17	3.57732	0.0269428	F	0	0	0	0	0	0	0	0	0	0	0	0	0	0	0	0	0	0	0	0	0	0	0	0
G10393.16	14	+	1272	8	novel_in_catalog	ENSMUSG00000002326	novel	1993	10	coding	194	585	363	947	55913187	55915870	FALSE	TRUE	TRUE	Full	1	17	2.95845	0.0222817	F	0	0	0	0	0	0	0	0	0	0	0	0	0	0	0	0	0	0	0	0	0	0	0	0
G10393.17	14	+	1415	9	novel_in_catalog	ENSMUSG00000002326	novel	1993	10	coding	174	525	116	640	55910172	55914444	TRUE	TRUE	TRUE	Full	3	17	4.02465	0.0303119	F	0	0	0	0	0	0	0	0	2	0	0	0	0	0	0	0	0	3	0	0	0	0	0	0
G10393.19	14	+	3388	6	novel_in_catalog	ENSMUSG00000002326	novel	1993	10	coding	163	492	109	600	55910172	55913216	TRUE	TRUE	TRUE	Full	1	17	3.62379	0.0272928	F	0	0	0	0	0	0	0	0	0	0	0	0	0	0	0	0	0	0	0	0	0	0	0	0
G10393.2	14	+	1868	10	full-splice_match	ENSMUSG00000002326	ENSMUST00000002397	1993	10	coding	348	1047	174	1220	55910172	55915870	FALSE	TRUE	TRUE	Full	1	17	3.3374	0.0251359	F	0	0	0	0	0	0	0	0	0	0	0	0	0	0	0	0	0	0	0	0	0	0	0	0
G10393.22	14	+	1625	11	novel_not_in_catalog	ENSMUSG00000002326	novel	1993	10	coding	194	585	716	1300	55913187	55915870	FALSE	TRUE	TRUE	Full	1	17	3.32437	0.0250377	F	0	0	0	0	0	0	0	0	0	0	0	0	0	0	0	0	0	0	0	0	0	0	0	0
G10393.23	14	+	1308	8	novel_in_catalog	ENSMUSG00000002326	novel	1993	10	coding	285	858	123	980	55910172	55915870	FALSE	TRUE	TRUE	Full	1	17	3.65303	0.027513	F	0	0	0	0	0	0	0	0	0	0	0	0	0	0	0	0	0	0	0	0	0	0	0	0
G10393.26	14	+	1464	10	novel_in_catalog	ENSMUSG00000002326	novel	773	7	coding	348	1047	90	1136	55910172	55915870	FALSE	TRUE	TRUE	Full	41	17	9.48531	0.0714392	F	2	4	0	3	3	4	3	7	4	0	2	4	4	6	2	2	7	8	0	3	4	3	2	2
G10393.27	14	+	1677	9	incomplete-splice_match	ENSMUSG00000002326	ENSMUST00000002397	1993	10	coding	348	1047	303	1349	55910172	55915870	FALSE	TRUE	TRUE	Full	17	17	6.78468	0.0510992	F	0	0	0	0	0	2	0	0	0	0	2	0	0	0	0	0	0	0	3	0	0	0	0	2
G10393.5	14	+	1477	9	novel_in_catalog	ENSMUSG00000002326	novel	1993	10	coding	224	675	147	821	55910172	55915348	TRUE	TRUE	TRUE	Full	1	17	3.15622	0.0237713	F	0	0	0	0	0	0	0	0	0	0	0	0	0	0	0	0	0	0	0	0	0	0	0	0
G10393.6	14	+	1400	9	novel_in_catalog	ENSMUSG00000002326	novel	1993	10	coding	308	927	147	1073	55910172	55915870	FALSE	TRUE	TRUE	Full	1	17	8.67002	0.0652988	F	0	0	0	0	0	0	0	0	0	0	0	0	0	0	0	0	0	0	0	0	0	0	0	0
G10393.7	14	+	978	5	incomplete-splice_match	ENSMUSG00000002326	ENSMUST00000002397	1993	10	coding	163	492	133	624	55910172	55913216	FALSE	TRUE	FALSE	Full	1	17	3.01633	0.0227177	F	0	0	0	0	0	0	0	0	0	0	0	0	0	0	0	0	0	0	0	0	0	0	0	0
G10393.8	14	+	2387	7	novel_in_catalog	ENSMUSG00000002326	novel	1993	10	coding	272	819	129	947	55910172	55914565	TRUE	TRUE	TRUE	Full	1	17	3.33721	0.0251344	F	0	0	0	0	0	0	0	0	0	0	0	0	0	0	0	0	0	0	0	0	0	0	2	0
G10394.1	14	-	2581	8	incomplete-splice_match	ENSMUSG00000007589	ENSMUST00000227842	2001	9	coding	283	852	744	1595	55918320	55914652	FALSE	TRUE	TRUE	Full	1	21	2.75893	0.0279497	F	0	0	0	0	0	0	0	0	0	0	0	0	0	0	0	0	0	0	0	0	0	0	0	0
G10394.10	14	-	1544	9	novel_in_catalog	ENSMUSG00000007589	novel	2956	9	coding	356	1071	228	1298	55919038	55916795	FALSE	TRUE	TRUE	Full	7	21	3.88299	0.0393372	F	0	0	0	0	0	2	0	2	3	0	0	0	0	0	0	0	0	0	0	3	0	2	2	0
G10394.11	14	-	1629	8	novel_in_catalog	ENSMUSG00000007589	novel	2956	9	coding	229	690	694	1383	55918086	55916795	FALSE	TRUE	TRUE	Full	1	21	3.20782	0.0324972	F	0	0	0	0	0	0	0	0	0	0	0	0	0	0	2	0	0	0	0	0	0	0	0	0
G10394.12	14	-	1954	7	novel_in_catalog	ENSMUSG00000007589	novel	3130	8	coding	199	600	226	825	55919038	55918042	TRUE	TRUE	TRUE	Full	1	21	3.19754	0.0323931	F	0	0	0	0	0	0	0	0	0	0	0	0	0	0	0	0	0	2	0	0	0	0	0	0
G10394.13	14	-	1689	7	novel_in_catalog	ENSMUSG00000007589	novel	2956	9	coding	229	690	759	1448	55918086	55916795	FALSE	TRUE	TRUE	Full	1	21	4.76411	0.0482635	F	0	0	0	0	0	0	0	0	0	0	0	0	0	0	0	0	0	0	3	0	0	0	0	0
G10394.14	14	-	1598	8	novel_in_catalog	ENSMUSG00000007589	novel	2956	9	coding	378	1137	226	1362	55919038	55916795	FALSE	TRUE	TRUE	Full	15	21	5.75596	0.0583115	F	6	0	0	2	0	0	0	2	0	0	0	0	0	0	0	2	7	2	2	4	4	7	0	0
G10394.15	14	-	1795	8	novel_in_catalog	ENSMUSG00000007589	novel	2956	9	coding	229	690	870	1559	55918086	55916795	FALSE	TRUE	TRUE	Full	7	21	6.46576	0.0655022	F	6	0	0	0	0	0	0	0	0	0	0	4	0	0	0	0	3	0	0	0	0	2	0	0
G10394.16	14	-	2046	6	novel_in_catalog	ENSMUSG00000007589	novel	3130	8	coding	210	633	1178	1810	55917875	55916795	FALSE	TRUE	TRUE	Full	10	21	4.87339	0.0493705	F	3	2	2	0	0	0	0	0	0	0	0	0	0	0	0	0	0	0	2	5	4	6	0	0
G10394.17	14	-	2128	5	novel_in_catalog	ENSMUSG00000007589	novel	3130	8	coding	174	525	228	752	55919038	55918301	TRUE	TRUE	TRUE	Full	1	21	3.06646	0.0310652	F	0	0	0	0	0	0	0	0	0	0	0	0	0	0	0	0	0	0	0	0	0	2	0	0
G10394.19	14	-	1701	9	full-splice_match	ENSMUSG00000007589	ENSMUST00000007733	2956	9	coding	414	1245	226	1470	55919038	55916795	FALSE	TRUE	TRUE	Full	44	21	16.6857	0.169037	T	13	11	10	9	7	5	8	4	13	14	3	9	6	17	23	6	12	10	7	16	22	13	14	16
G10394.20	14	-	1781	8	incomplete-splice_match	ENSMUSG00000007589	ENSMUST00000007733	2956	9	coding	278	837	714	1550	55918320	55916795	FALSE	TRUE	TRUE	Full	11	21	5.25414	0.0532278	F	0	5	0	0	0	2	4	0	0	0	3	0	0	0	5	0	0	0	0	0	0	0	0	0
G10394.21	14	-	1866	7	novel_in_catalog	ENSMUSG00000007589	novel	2956	9	coding	229	690	946	1635	55918086	55916795	FALSE	TRUE	TRUE	Full	15	21	4.33133	0.0438791	F	0	2	0	0	0	0	0	0	4	2	0	0	0	2	2	0	0	4	0	4	4	0	0	0
G10394.22	14	-	1577	8	novel_in_catalog	ENSMUSG00000007589	novel	2956	9	coding	378	1137	241	1377	55919038	55916795	FALSE	TRUE	TRUE	Full	1	21	3.42035	0.0346503	F	0	0	0	0	0	0	0	0	0	0	0	0	0	0	0	0	2	0	0	0	0	0	0	0
G10394.23	14	-	1809	7	novel_in_catalog	ENSMUSG00000007589	novel	2956	9	coding	229	690	948	1637	55918086	55916795	FALSE	TRUE	FALSE	Full	1	21	3.31681	0.0336014	F	2	0	0	0	0	0	0	0	0	0	0	0	0	0	0	0	0	0	0	0	0	0	0	0
G10394.3	14	-	2363	8	novel_in_catalog	ENSMUSG00000007589	novel	2001	9	coding	383	1152	226	1377	55919038	55914652	FALSE	TRUE	TRUE	Full	3	21	6.61	0.0669634	F	0	0	0	0	0	0	0	0	0	0	0	0	0	0	0	0	0	0	0	0	0	0	0	0
G10394.4	14	-	2638	7	novel_in_catalog	ENSMUSG00000007589	novel	2001	9	coding	234	705	948	1652	55918086	55914652	FALSE	TRUE	TRUE	Full	5	21	4.14561	0.0419976	F	0	0	0	0	0	0	0	0	0	0	0	0	0	0	0	0	0	0	0	0	0	0	0	0
G10394.5	14	-	2278	9	novel_in_catalog	ENSMUSG00000007589	novel	2001	9	coding	361	1086	209	1294	55919038	55914652	FALSE	TRUE	TRUE	Full	1	21	3.14305	0.0318411	F	0	0	0	0	0	0	0	0	0	0	0	0	0	0	0	0	0	0	0	0	0	0	0	0
G10394.6	14	-	3003	9	full-splice_match	ENSMUSG00000007589	ENSMUST00000007733	2956	9	coding	414	1245	231	1475	55919038	55916795	FALSE	TRUE	TRUE	Full	1	21	2.91761	0.0295572	F	0	0	0	0	0	0	0	0	0	0	0	0	0	0	0	0	0	0	0	0	0	0	0	0
G10394.7	14	-	1896	8	full-splice_match	ENSMUSG00000007589	ENSMUST00000228264	3130	8	coding	199	600	237	836	55919038	55918042	TRUE	TRUE	TRUE	Full	4	21	3.80928	0.0385904	F	0	0	0	0	0	3	0	0	0	0	0	0	0	0	0	0	0	0	0	0	0	2	0	0
G10394.8	14	-	1966	7	novel_in_catalog	ENSMUSG00000007589	novel	3130	8	coding	166	501	226	726	55919038	55918228	TRUE	TRUE	TRUE	Full	4	21	3.86392	0.0391439	F	0	0	0	0	0	0	0	0	0	0	0	0	0	0	2	0	0	2	0	0	3	0	0	0
G10394.9	14	-	2055	6	novel_in_catalog	ENSMUSG00000007589	novel	3130	8	coding	210	633	1168	1800	55917875	55916795	FALSE	TRUE	TRUE	Full	2	21	3.23976	0.0328208	F	2	0	2	0	0	0	0	0	0	0	0	0	0	0	0	0	0	0	0	0	0	0	0	0
G10395.10	14	-	2276	16	full-splice_match	ENSMUSG00000040472	ENSMUST00000169237	2547	16	coding	567	1704	59	1762	55959303	55953847	FALSE	TRUE	TRUE	Full	6	28	13.5918	0.0677047	F	0	0	0	0	0	0	0	0	0	5	0	0	0	0	11	0	0	0	0	6	0	0	0	0
G10395.12	14	-	2218	16	novel_in_catalog	ENSMUSG00000040472	novel	1886	17	coding	530	1593	112	1704	55959303	55953847	FALSE	TRUE	TRUE	Full	1	28	3.14531	0.0156676	F	0	0	0	0	0	0	0	0	0	0	0	0	0	0	0	0	0	0	0	0	0	0	0	0
G10395.13	14	-	2199	16	novel_in_catalog	ENSMUSG00000040472	novel	1886	17	coding	297	894	792	1685	55956976	55953847	FALSE	TRUE	TRUE	Full	1	28	6.31244	0.031444	F	0	0	0	0	0	0	0	0	0	0	0	0	0	0	0	0	0	0	0	0	0	0	0	0
G10395.14	14	-	1636	11	incomplete-splice_match	ENSMUSG00000040472	ENSMUST00000169237	2547	16	coding	297	894	229	1122	55956976	55953847	FALSE	TRUE	TRUE	Full	39	28	7.32449	0.0364853	F	3	6	3	5	4	2	6	7	4	6	2	9	6	7	3	3	2	2	3	2	7	2	3	3
G10395.15	14	-	2413	16	novel_in_catalog	ENSMUSG00000040472	novel	1886	17	coding	317	954	112	1065	55959303	55956833	TRUE	TRUE	TRUE	Full	3	28	3.23318	0.0161054	F	0	0	0	2	0	0	0	0	0	0	0	0	0	0	2	0	0	0	0	0	0	0	0	0
G10395.16	14	-	2515	16	full-splice_match	ENSMUSG00000040472	ENSMUST00000228826	2492	16	coding	339	1020	201	1220	55959303	55956683	TRUE	TRUE	TRUE	Full	1	28	3.15622	0.015722	F	0	0	0	0	0	0	0	0	0	0	0	0	0	0	0	0	0	0	0	0	0	0	0	0
G10395.17	14	-	2426	16	novel_in_catalog	ENSMUSG00000040472	novel	1886	17	coding	339	1020	112	1131	55959303	55956683	TRUE	TRUE	TRUE	Full	23	28	5.88312	0.0293054	F	0	4	0	3	3	2	0	0	4	0	4	0	0	2	0	0	0	3	0	4	2	4	4	0
G10395.19	14	-	2510	15	novel_in_catalog	ENSMUSG00000040472	novel	1886	17	coding	317	954	112	1065	55959303	55956833	TRUE	TRUE	TRUE	Full	13	28	3.59414	0.0179034	F	2	0	0	0	0	0	0	0	0	2	3	2	0	2	2	0	2	0	0	0	2	0	2	2
G10395.2	14	-	2767	17	full-splice_match	ENSMUSG00000040472	ENSMUST00000163889	1886	17	coding	567	1704	90	1793	55959303	55953847	FALSE	TRUE	TRUE	Full	1	28	3.33721	0.0166236	F	0	0	0	0	0	0	0	0	0	0	0	0	0	0	0	0	0	0	0	0	0	0	2	0
G10395.20	14	-	867	3	incomplete-splice_match	ENSMUSG00000040472	ENSMUST00000169237	2547	16	coding	10	33	321	353	55953879	55953847	FALSE	TRUE	TRUE	Full	1	28	3.69006	0.0183812	F	0	0	0	0	0	0	0	0	0	0	0	0	0	0	0	0	0	0	0	0	0	0	0	0
G10395.22	14	-	952	4	incomplete-splice_match	ENSMUSG00000040472	ENSMUST00000169237	2547	16	coding	130	393	50	442	55955944	55953847	FALSE	TRUE	TRUE	Full	1	28	4.4542	0.0221876	F	0	0	0	0	0	0	0	0	0	0	0	0	0	0	0	0	0	0	0	0	0	0	0	0
G10395.25	14	-	1815	16	novel_in_catalog	ENSMUSG00000040472	novel	1886	17	coding	539	1620	112	1731	55959303	55953847	FALSE	TRUE	TRUE	Full	1	28	3.49114	0.0173903	F	0	0	0	0	0	0	0	0	0	0	0	0	0	0	0	0	0	0	0	0	0	0	0	0
G10395.26	14	-	1897	16	novel_in_catalog	ENSMUSG00000040472	novel	2882	17	coding	297	894	923	1816	55956976	55953847	FALSE	TRUE	TRUE	Full	1	28	4.73433	0.023583	F	0	0	0	0	0	0	0	0	0	0	0	0	0	0	0	0	0	0	0	0	0	0	0	0
G10395.27	14	-	1784	15	novel_in_catalog	ENSMUSG00000040472	novel	2547	16	coding	297	894	810	1703	55956976	55953847	FALSE	TRUE	TRUE	Full	1	28	3.36102	0.0167421	F	0	0	0	0	0	0	0	0	0	0	0	0	0	0	0	0	0	0	0	0	0	0	0	0
G10395.28	14	-	1203	11	incomplete-splice_match	ENSMUSG00000040472	ENSMUST00000163889	1886	17	coding	297	894	229	1122	55956976	55953847	FALSE	TRUE	TRUE	Full	24	28	4.59987	0.0229132	F	2	0	2	3	2	4	3	2	0	0	2	2	2	6	4	3	0	0	3	3	2	0	3	0
G10395.29	14	-	1936	15	incomplete-splice_match	ENSMUSG00000040472	ENSMUST00000228826	2492	16	coding	339	1020	57	1076	55959303	55956683	TRUE	TRUE	TRUE	Full	1	28	3.38255	0.0168494	F	0	0	0	0	0	2	0	0	0	0	0	0	0	0	0	0	0	0	0	0	0	0	0	0
G10395.3	14	-	2883	17	full-splice_match	ENSMUSG00000040472	ENSMUST00000227061	2882	17	coding	567	1704	209	1912	55959303	55953847	FALSE	TRUE	TRUE	Full	1	28	3.15622	0.015722	F	0	0	0	0	0	0	0	0	0	0	0	0	0	0	0	0	0	0	0	0	0	0	0	0
G10395.31	14	-	1977	17	full-splice_match	ENSMUSG00000040472	ENSMUST00000227061	2882	17	coding	567	1704	209	1912	55959303	55953847	FALSE	TRUE	TRUE	Full	24	28	5.25593	0.0261812	F	0	4	0	2	0	2	0	0	0	0	0	0	2	2	4	0	2	2	0	0	0	2	3	2
G10395.32	14	-	1880	17	full-splice_match	ENSMUSG00000040472	ENSMUST00000163889	1886	17	coding	567	1704	112	1815	55959303	55953847	FALSE	TRUE	TRUE	Full	48	28	29.0872	0.144891	F	14	14	9	17	15	16	18	10	9	16	9	13	16	17	13	7	28	34	13	24	24	21	26	31
G10395.33	14	-	2061	15	novel_in_catalog	ENSMUSG00000040472	novel	1886	17	coding	317	954	112	1065	55959303	55956833	TRUE	TRUE	TRUE	Full	7	28	4.63078	0.0230672	F	0	3	0	0	0	0	0	0	0	0	0	0	0	0	0	0	0	2	0	0	2	6	3	0
G10395.34	14	-	2153	14	novel_in_catalog	ENSMUSG00000040472	novel	1886	17	coding	263	792	1297	2088	55956693	55953847	FALSE	TRUE	TRUE	Full	1	28	3.32437	0.0165596	F	0	0	0	0	0	0	0	0	0	0	0	0	0	0	0	0	0	0	0	0	0	0	0	0
G10395.35	14	-	2222	14	novel_not_in_catalog	ENSMUSG00000040472	novel	1886	17	coding	176	531	1627	2157	55956182	55953847	FALSE	TRUE	TRUE	Full	1	28	4.6965	0.0233945	F	0	0	0	0	0	0	0	0	0	0	0	0	2	0	0	0	0	0	0	0	0	0	0	0
G10395.36	14	-	1824	16	full-splice_match	ENSMUSG00000040472	ENSMUST00000169237	2547	16	coding	567	1704	57	1760	55959303	55953847	FALSE	TRUE	TRUE	Full	5	28	5.24652	0.0261344	F	0	4	2	0	0	0	0	5	0	0	0	0	0	0	0	0	0	0	0	0	3	0	0	0
G10395.37	14	-	1963	16	novel_in_catalog	ENSMUSG00000040472	novel	1886	17	coding	317	954	112	1065	55959303	55956833	TRUE	TRUE	TRUE	Full	1	28	2.88641	0.014378	F	0	0	0	0	0	0	0	0	0	0	0	0	0	0	0	0	0	0	0	0	0	0	0	0
G10395.38	14	-	1976	16	novel_in_catalog	ENSMUSG00000040472	novel	1886	17	coding	339	1020	112	1131	55959303	55956683	TRUE	TRUE	TRUE	Full	17	28	4.19093	0.0208762	F	4	3	0	0	0	0	0	0	2	0	0	0	0	0	2	0	3	3	0	0	2	0	0	0
G10395.6	14	-	2318	16	novel_in_catalog	ENSMUSG00000040472	novel	2882	17	coding	297	894	908	1801	55956976	55953847	FALSE	TRUE	TRUE	Full	2	28	4.69756	0.0233998	F	0	0	0	0	0	0	0	0	0	0	0	0	0	0	0	0	0	0	0	0	0	0	0	0
G10395.8	14	-	2422	17	full-splice_match	ENSMUSG00000040472	ENSMUST00000227061	2882	17	coding	567	1704	205	1908	55959303	55953847	FALSE	TRUE	TRUE	Full	28	28	6.29062	0.0313353	F	3	4	4	3	2	0	2	0	0	0	0	0	0	0	5	0	0	0	0	0	4	5	4	2
G10395.9	14	-	2329	17	full-splice_match	ENSMUSG00000040472	ENSMUST00000163889	1886	17	coding	567	1704	112	1815	55959303	55953847	FALSE	TRUE	TRUE	Full	47	28	49.9977	0.249052	T	52	45	30	47	25	34	27	16	31	22	38	30	20	31	22	11	45	31	12	33	42	23	57	22
G10396.10	14	-	1223	8	novel_in_catalog	ENSMUSG00000002332	novel	1477	9	coding	176	531	431	961	55978735	55976741	FALSE	TRUE	TRUE	Full	4	23	23.5399	0.0751196	F	0	0	0	0	0	0	0	0	0	0	0	0	0	0	0	0	0	0	0	0	0	0	0	0
G10396.11	14	-	1109	7	incomplete-splice_match	ENSMUSG00000002332	ENSMUST00000128802	2502	8	coding	176	531	317	847	55978735	55976741	FALSE	TRUE	TRUE	Full	42	23	11.533	0.0368036	F	3	2	8	0	7	2	5	8	3	5	3	0	2	3	5	5	7	19	24	11	14	8	5	8
G10396.12	14	-	1339	8	novel_in_catalog	ENSMUSG00000002332	novel	1477	9	coding	195	588	490	1077	55981134	55976741	FALSE	TRUE	TRUE	Full	8	23	4.61281	0.0147202	F	0	0	0	0	0	0	0	0	0	0	0	0	0	0	0	0	0	0	0	0	0	0	0	0
G10396.13	14	-	1223	7	novel_in_catalog	ENSMUSG00000002332	novel	1477	9	coding	195	588	374	961	55981134	55976741	FALSE	TRUE	TRUE	Full	3	23	5.44265	0.0173684	F	0	0	0	0	0	0	0	0	0	0	0	0	0	0	0	0	0	0	0	0	0	0	0	0
G10396.14	14	-	1029	6	novel_in_catalog	ENSMUSG00000002332	novel	2502	8	coding	195	588	180	767	55981134	55976741	FALSE	TRUE	TRUE	Full	5	23	3.51001	0.011201	F	0	0	0	0	0	0	0	0	0	0	0	0	0	0	0	0	0	0	0	0	0	0	0	0
G10396.15	14	-	1553	9	novel_not_in_catalog	ENSMUSG00000002332	novel	1477	9	coding	114	345	947	1291	55978240	55976741	FALSE	TRUE	TRUE	Full	16	23	10.7824	0.0344083	F	0	0	0	0	0	0	0	0	0	0	0	0	0	0	0	0	0	3	0	0	0	3	4	0
G10396.16	14	-	1478	8	novel_not_in_catalog	ENSMUSG00000002332	novel	1477	9	coding	109	330	887	1216	55978225	55976741	FALSE	TRUE	TRUE	Full	3	23	3.85388	0.0122983	F	0	0	0	0	0	0	0	0	0	0	0	0	0	0	0	0	0	0	0	0	0	0	0	0
G10396.17	14	-	1728	8	novel_in_catalog	ENSMUSG00000002332	novel	1477	9	coding	114	345	1122	1466	55978240	55976741	FALSE	TRUE	TRUE	Full	4	23	3.57879	0.0114205	F	0	0	0	0	0	0	0	0	0	0	0	0	0	0	0	0	0	0	0	0	0	0	0	2
G10396.18	14	-	1359	9	novel_not_in_catalog	ENSMUSG00000002332	novel	1477	9	coding	189	570	228	797	55982512	55978395	TRUE	TRUE	TRUE	Full	2	23	3.47942	0.0111034	F	0	0	0	0	0	0	0	0	0	0	0	0	0	0	0	0	0	0	0	0	0	0	0	0
G10396.19	14	-	1274	8	novel_not_in_catalog	ENSMUSG00000002332	novel	1477	9	coding	205	618	223	840	55982512	55977044	FALSE	TRUE	TRUE	Full	5	23	5.23162	0.0166949	F	0	0	0	0	0	0	0	0	0	0	0	0	0	0	0	0	0	0	0	0	0	0	0	0
G10396.20	14	-	1268	8	novel_in_catalog	ENSMUSG00000002332	novel	1477	9	coding	260	783	224	1006	55982512	55976741	FALSE	TRUE	TRUE	Full	1	23	5.26314	0.0167955	F	0	0	0	0	0	0	0	3	0	0	0	0	0	0	0	0	0	0	0	0	0	0	0	0
G10396.21	14	-	2135	8	novel_in_catalog	ENSMUSG00000002332	novel	1477	9	coding	322	969	223	1191	55982512	55977857	TRUE	TRUE	TRUE	Full	8	23	3.58718	0.0114473	F	0	0	0	0	2	0	0	0	0	0	2	0	0	0	0	0	3	2	2	3	0	2	0	0
G10396.22	14	-	2279	8	novel_not_in_catalog	ENSMUSG00000002332	novel	1477	9	coding	189	570	228	797	55982512	55978395	TRUE	TRUE	TRUE	Full	4	23	5.51771	0.0176079	F	0	0	0	0	0	0	0	0	0	0	0	0	0	0	0	0	0	0	0	0	0	0	0	0
G10396.23	14	-	1344	8	novel_in_catalog	ENSMUSG00000002332	novel	1477	9	coding	218	657	223	879	55982512	55977075	TRUE	TRUE	TRUE	Full	8	23	5.36559	0.0171224	F	0	0	2	3	0	0	0	0	0	0	5	2	3	0	2	5	0	0	0	0	0	0	0	0
G10396.25	14	-	2438	7	novel_in_catalog	ENSMUSG00000002332	novel	1477	9	coding	322	969	223	1191	55982512	55977857	TRUE	TRUE	TRUE	Full	20	23	5.08348	0.0162222	F	2	3	2	7	0	0	0	0	9	2	2	2	0	4	2	0	0	3	0	2	0	6	3	2
G10396.26	14	-	2753	6	novel_in_catalog	ENSMUSG00000002332	novel	1477	9	coding	179	540	229	768	55982512	55978595	TRUE	TRUE	TRUE	Full	1	23	3.19754	0.0102039	F	0	0	0	0	0	0	0	0	0	0	0	0	0	0	0	0	0	2	0	0	0	0	0	0
G10396.27	14	-	1550	8	novel_in_catalog	ENSMUSG00000002332	novel	1477	9	coding	275	828	228	1055	55982512	55976974	FALSE	TRUE	TRUE	Full	1	23	4.6608	0.0148733	F	0	0	0	0	0	0	0	0	0	0	0	0	0	0	0	0	0	0	0	0	0	0	0	0
G10396.29	14	-	2609	7	novel_not_in_catalog	ENSMUSG00000002332	novel	1477	9	coding	189	570	256	825	55982512	55978395	TRUE	TRUE	TRUE	Full	1	23	3.33721	0.0106496	F	0	0	0	0	0	0	0	0	0	0	0	0	0	0	0	0	0	0	0	0	0	0	2	0
G10396.30	14	-	2430	7	novel_in_catalog	ENSMUSG00000002332	novel	1477	9	coding	179	540	211	750	55982512	55978595	TRUE	TRUE	TRUE	Full	1	23	2.85755	0.00911888	F	0	0	0	0	0	0	0	0	0	0	0	0	0	0	0	0	0	0	0	2	0	0	0	0
G10396.32	14	-	1380	9	full-splice_match	ENSMUSG00000002332	ENSMUST00000002403	1477	9	coding	309	930	223	1152	55982512	55976741	FALSE	TRUE	TRUE	Full	1	23	3.31681	0.0105845	F	2	0	0	0	0	0	0	0	0	0	0	0	0	0	0	0	0	0	0	0	0	0	0	0
G10396.7	14	-	1402	9	full-splice_match	ENSMUSG00000002332	ENSMUST00000002403	1477	9	coding	309	930	211	1140	55982512	55976741	FALSE	TRUE	TRUE	Full	48	23	186.399	0.594828	T	129	139	126	122	118	134	161	81	96	122	92	87	81	173	202	101	182	204	156	211	197	174	147	153
G10396.8	14	-	1483	9	novel_not_in_catalog	ENSMUSG00000002332	novel	1477	9	coding	309	930	292	1221	55982512	55976741	FALSE	TRUE	TRUE	Full	5	23	6.05924	0.019336	F	0	0	0	0	0	0	0	0	0	0	0	0	0	0	0	0	0	0	0	0	0	0	0	0
G10396.9	14	-	1327	9	novel_not_in_catalog	ENSMUSG00000002332	novel	1477	9	coding	176	531	535	1065	55978735	55976741	FALSE	TRUE	TRUE	Full	1	23	3.15622	0.010072	F	0	0	0	0	0	0	0	0	0	0	0	0	0	0	0	0	0	0	0	0	0	0	0	0
G10397.2	14	+	2277	10	novel_not_in_catalog	ENSMUSG00000019297	novel	3694	10	coding	498	1497	304	1800	55983623	55990765	TRUE	TRUE	FALSE	Full	1	4	3.65303	0.160497	F	0	0	0	0	0	0	0	0	0	0	0	0	0	0	0	0	0	0	0	0	0	0	0	0
G10397.3	14	+	2158	10	full-splice_match	ENSMUSG00000019297	ENSMUST00000019441	3694	10	coding	552	1659	304	1962	55983623	55991255	FALSE	TRUE	FALSE	Full	21	4	4.95991	0.217915	F	0	2	0	0	0	0	0	0	2	2	0	0	0	5	3	0	0	0	0	6	0	3	2	0
G10397.4	14	+	2225	10	full-splice_match	ENSMUSG00000019297	ENSMUST00000019441	3694	10	coding	552	1659	304	1962	55983623	55991255	FALSE	TRUE	FALSE	Full	42	4	10.9764	0.482252	T	6	8	10	8	4	5	9	4	7	4	11	4	3	7	3	0	7	5	0	4	9	10	14	6
G10397.5	14	+	1737	9	incomplete-splice_match	ENSMUSG00000019297	ENSMUST00000019441	3694	10	coding	242	729	746	1474	55989554	55991255	FALSE	TRUE	FALSE	Full	2	4	3.17142	0.139337	F	0	0	0	0	0	0	0	0	0	0	0	0	0	0	0	0	0	2	0	0	0	0	0	0
G10398.1	14	-	2021	5	novel_not_in_catalog	ENSMUSG00000022219	novel	1212	5	coding	248	747	912	1658	55999305	55991893	FALSE	TRUE	TRUE	Full	2	1	3.38342	1	T	0	0	0	0	0	0	0	0	0	0	0	0	0	0	0	0	0	0	0	0	0	0	0	0
G104.1	1	-	1481	9	full-splice_match	ENSMUSG00000025916	ENSMUST00000027049	1425	9	coding	357	1074	220	1293	10073588	10039045	FALSE	TRUE	TRUE	Full	4	1	3.56454	1	T	0	0	0	0	2	0	0	0	0	0	0	0	0	0	0	0	0	0	0	0	2	0	0	0
G1040.1	1	+	2110	18	novel_not_in_catalog	ENSMUSG00000070031	novel	2417	17	coding	534	1605	153	1757	85528881	85572403	FALSE	TRUE	TRUE	Full	1	4	3.38255	0.21294	F	0	0	0	0	0	2	0	0	0	0	0	0	0	0	0	0	0	0	0	0	0	0	0	0
G1040.2	1	+	2176	16	novel_in_catalog	ENSMUSG00000070031	novel	2417	17	coding	499	1500	320	1819	85528881	85572403	FALSE	TRUE	TRUE	Full	1	4	3.20782	0.20194	F	0	0	0	0	0	0	0	0	0	0	0	0	0	0	2	0	0	0	0	0	0	0	0	0
G1040.4	1	+	2197	18	novel_in_catalog	ENSMUSG00000070031	novel	2417	17	coding	305	918	928	1845	85555943	85572403	FALSE	TRUE	TRUE	Full	2	4	4.42859	0.278792	F	0	0	0	0	0	0	0	0	0	0	3	0	0	0	0	0	0	0	0	0	0	0	0	0
G1040.8	1	+	2071	17	full-splice_match	ENSMUSG00000070031	ENSMUST00000080204	2417	17	coding	534	1605	115	1719	85528881	85572403	FALSE	TRUE	TRUE	Full	9	4	4.86601	0.306328	T	0	0	0	0	2	0	0	2	4	5	0	0	0	0	3	0	2	0	0	0	0	0	3	0
G10400.1	14	-	3477	26	full-splice_match	ENSMUSG00000022220	ENSMUST00000002398	3444	26	coding	1077	3234	161	3394	56021135	56006598	FALSE	TRUE	TRUE	Full	1	1	3.092	1	T	0	0	0	0	0	0	0	0	0	0	0	0	0	0	0	0	0	0	0	0	0	0	0	0
G10401.1	14	+	1753	4	antisense	novelGene_ENSMUSG00000022221_AS	novel	NA	NA	non_coding	NA	NA	NA	NA	NA	NA	NA	TRUE	TRUE	Full	1	1	3.1072	1	T	0	0	0	0	0	0	0	0	0	0	0	0	0	0	0	0	0	0	0	0	0	0	0	0
G10402.1	14	-	1845	10	full-splice_match	ENSMUSG00000022221	ENSMUST00000022830	1892	10	coding	486	1461	184	1644	56026093	56022654	FALSE	TRUE	TRUE	Full	3	1	3.60116	1	T	0	0	0	0	0	0	0	0	0	0	0	0	0	0	0	0	0	0	0	0	0	0	0	0
G10405.3	14	-	4704	3	full-splice_match	ENSMUSG00000040380	ENSMUST00000063871	4866	3	coding	197	594	46	639	56121644	56120437	FALSE	TRUE	TRUE	Full	1	4	19.9009	0.304629	F	12	0	0	0	0	0	0	0	0	0	0	0	0	0	0	0	0	0	0	0	0	0	0	0
G10405.4	14	-	4654	3	full-splice_match	ENSMUSG00000040380	ENSMUST00000063871	4866	3	coding	197	594	58	651	56121644	56120437	FALSE	TRUE	FALSE	Full	1	4	3.31681	0.0507716	F	2	0	0	0	0	0	0	0	0	0	0	0	0	0	0	0	0	0	0	0	0	0	0	0
G10405.5	14	-	1980	3	full-splice_match	ENSMUSG00000040380	ENSMUST00000063871	4866	3	coding	197	594	117	710	56121644	56120437	FALSE	TRUE	TRUE	Full	2	4	33.0488	0.50589	T	36	0	0	0	0	0	0	0	0	0	0	0	0	0	0	0	0	4	0	0	0	0	0	0
G10405.6	14	-	1855	3	full-splice_match	ENSMUSG00000040380	ENSMUST00000063871	4866	3	coding	197	594	67	660	56121644	56120437	FALSE	TRUE	TRUE	Full	2	4	9.06159	0.138709	F	9	0	0	0	0	0	0	0	0	0	0	0	0	0	0	0	0	2	0	0	0	0	0	0
G10406.1	14	+	3502	8	full-splice_match	ENSMUSG00000047153	ENSMUST00000022831	3898	8	coding	671	2016	198	2213	56123248	56132569	FALSE	TRUE	TRUE	Full	1	2	5.00582	0.601471	T	0	0	0	0	0	0	0	0	0	0	0	0	0	0	0	0	0	0	0	0	0	0	3	0
G10406.2	14	+	3721	8	full-splice_match	ENSMUSG00000047153	ENSMUST00000022831	3898	8	coding	671	2016	183	2198	56123248	56132569	FALSE	TRUE	FALSE	Full	1	2	3.31681	0.398529	F	2	0	0	0	0	0	0	0	0	0	0	0	0	0	0	0	0	0	0	0	0	0	0	0
G10407.10	14	-	1468	5	full-splice_match	ENSMUSG00000022223	ENSMUST00000227139	867	5	coding	123	372	780	1151	56135431	56135060	FALSE	TRUE	TRUE	Full	48	31	22.5986	0.126329	F	8	9	17	15	20	11	22	16	11	13	19	13	7	13	20	4	31	13	30	20	28	36	21	15
G10407.11	14	-	1425	6	full-splice_match	ENSMUSG00000022223	ENSMUST00000226427	813	6	coding	186	561	548	1108	56135850	56135060	FALSE	TRUE	TRUE	Full	3	31	3.27018	0.0182807	F	0	0	0	0	0	0	0	0	0	0	0	0	0	0	0	0	0	0	0	0	0	0	0	0
G10407.12	14	-	1313	6	full-splice_match	ENSMUSG00000022223	ENSMUST00000227032	1023	6	coding	186	561	436	996	56135850	56135060	FALSE	TRUE	TRUE	Full	8	31	5.15537	0.0288192	F	0	0	2	0	6	0	0	0	0	0	0	0	0	0	2	0	2	0	0	0	0	0	0	0
G10407.13	14	-	1582	5	full-splice_match	ENSMUSG00000022223	ENSMUST00000227268	909	5	coding	186	561	705	1265	56135850	56135060	FALSE	TRUE	TRUE	Full	37	31	9.45409	0.0528495	F	3	12	8	3	3	2	5	6	2	5	7	3	2	11	6	6	8	14	7	12	10	6	6	6
G10407.14	14	-	1206	5	novel_in_catalog	ENSMUSG00000022223	novel	1023	6	coding	186	561	329	889	56135850	56135060	FALSE	TRUE	TRUE	Full	1	31	2.97518	0.0166316	F	0	0	0	0	0	0	0	0	0	0	0	0	0	0	0	0	0	0	0	0	0	0	0	0
G10407.15	14	-	1244	6	novel_in_catalog	ENSMUSG00000022223	novel	1023	6	coding	186	561	367	927	56135850	56135060	FALSE	TRUE	TRUE	Full	1	31	3.4856	0.0194849	F	0	0	0	0	0	0	0	0	0	2	0	0	0	0	0	0	0	0	0	0	0	0	0	0
G10407.16	14	-	1384	5	novel_in_catalog	ENSMUSG00000022223	novel	813	6	coding	186	561	507	1067	56135850	56135060	FALSE	TRUE	TRUE	Full	2	31	3.987	0.0222878	F	0	0	0	0	0	0	0	0	0	0	2	0	0	0	0	0	0	0	0	0	0	0	0	2
G10407.17	14	-	1503	4	novel_in_catalog	ENSMUSG00000022223	novel	909	5	coding	186	561	626	1186	56135850	56135060	FALSE	TRUE	TRUE	Full	1	31	3.1072	0.0173696	F	0	0	0	0	0	0	0	0	0	0	0	0	0	0	0	0	0	0	0	0	0	0	0	0
G10407.19	14	-	2023	5	novel_in_catalog	ENSMUSG00000022223	novel	1255	6	coding	186	561	1146	1706	56135850	56135060	FALSE	TRUE	TRUE	Full	2	31	3.2182	0.0179901	F	0	0	0	0	2	0	0	0	0	0	0	0	0	0	0	0	0	0	0	0	2	0	0	0
G10407.2	14	-	1121	5	novel_in_catalog	ENSMUSG00000022223	novel	1255	6	coding	123	372	431	802	56135431	56135060	FALSE	TRUE	TRUE	Full	2	31	5.95319	0.0332791	F	0	0	0	0	0	0	0	0	0	0	0	0	0	0	0	0	0	0	0	0	0	0	0	0
G10407.20	14	-	1273	3	novel_in_catalog	ENSMUSG00000022223	novel	867	5	coding	123	372	585	956	56135431	56135060	FALSE	TRUE	TRUE	Full	2	31	3.31768	0.0185462	F	0	0	0	0	0	0	2	0	0	0	0	0	0	0	0	0	0	0	0	0	0	0	0	0
G10407.21	14	-	2435	2	incomplete-splice_match	ENSMUSG00000022223	ENSMUST00000226746	501	3	coding	143	432	1687	2118	56135491	56135060	FALSE	TRUE	TRUE	Full	17	31	4.96421	0.0277506	F	0	0	4	2	2	2	0	3	2	0	3	3	3	0	3	0	0	0	0	2	6	3	5	2
G10407.22	14	-	1333	6	full-splice_match	ENSMUSG00000022223	ENSMUST00000227163	792	6	coding	123	372	646	1017	56135431	56135060	FALSE	TRUE	TRUE	Full	16	31	7.75959	0.0433771	F	0	0	0	0	0	0	0	0	0	0	0	2	3	0	0	0	0	0	0	4	0	3	0	0
G10407.23	14	-	1221	6	full-splice_match	ENSMUSG00000022223	ENSMUST00000111325	1255	6	coding	293	882	24	905	56137662	56135060	FALSE	TRUE	TRUE	Full	48	31	36.9132	0.206349	T	15	17	17	14	22	13	17	24	13	14	11	17	13	32	27	32	29	29	56	39	37	37	24	32
G10407.24	14	-	1305	5	novel_in_catalog	ENSMUSG00000022223	novel	1255	6	coding	321	966	24	989	56137662	56135060	FALSE	TRUE	TRUE	Full	4	31	4.13028	0.0230888	F	0	0	0	0	0	0	0	0	0	0	0	0	0	0	0	0	0	0	0	0	0	0	2	0
G10407.25	14	-	1138	5	novel_in_catalog	ENSMUSG00000022223	novel	1255	6	coding	123	372	451	822	56135431	56135060	FALSE	TRUE	TRUE	Full	3	31	4.61475	0.025797	F	0	0	0	0	0	0	0	3	0	0	0	0	0	0	0	0	0	0	0	0	0	0	0	2
G10407.26	14	-	1407	4	novel_in_catalog	ENSMUSG00000022223	novel	867	5	coding	123	372	720	1091	56135431	56135060	FALSE	TRUE	TRUE	Full	11	31	3.73939	0.0209037	F	0	0	0	0	0	2	2	3	0	0	0	0	0	2	0	0	2	0	5	0	2	0	0	0
G10407.27	14	-	1028	4	novel_in_catalog	ENSMUSG00000022223	novel	867	5	coding	123	372	341	712	56135431	56135060	FALSE	TRUE	TRUE	Full	1	31	3.1072	0.0173696	F	0	0	0	0	0	0	0	0	0	0	0	0	0	0	0	0	0	0	0	0	0	0	0	0
G10407.28	14	-	1549	5	novel_in_catalog	ENSMUSG00000022223	novel	498	6	coding	123	372	862	1233	56135431	56135060	FALSE	TRUE	TRUE	Full	1	31	3.50876	0.0196144	F	0	0	0	0	0	0	0	2	0	0	0	0	0	0	0	0	0	0	0	0	0	0	0	0
G10407.29	14	-	1400	5	novel_in_catalog	ENSMUSG00000022223	novel	1023	6	coding	186	561	524	1084	56135850	56135060	FALSE	TRUE	TRUE	Full	1	31	3.31681	0.0185414	F	2	0	0	0	0	0	0	0	0	0	0	0	0	0	0	0	0	0	0	0	0	0	0	0
G10407.30	14	-	2005	5	novel_in_catalog	ENSMUSG00000022223	novel	498	6	coding	186	561	1129	1689	56135850	56135060	FALSE	TRUE	TRUE	Full	3	31	3.17634	0.0177561	F	0	0	2	0	0	0	0	2	0	0	0	0	0	0	0	0	0	0	0	2	0	0	0	0
G10407.31	14	-	2264	4	novel_in_catalog	ENSMUSG00000022223	novel	909	5	coding	186	561	1388	1948	56135850	56135060	FALSE	TRUE	TRUE	Full	1	31	3.42035	0.0191202	F	0	0	0	0	0	0	0	0	0	0	0	0	0	0	0	0	2	0	0	0	0	0	0	0
G10407.33	14	-	2248	4	full-splice_match	ENSMUSG00000022223	ENSMUST00000228151	385	4	coding	143	432	1501	1932	56135491	56135060	FALSE	TRUE	TRUE	Full	4	31	3.33434	0.0186394	F	0	0	0	0	0	2	2	0	0	0	0	0	0	0	0	0	2	0	0	2	0	0	0	0
G10407.34	14	-	2193	3	full-splice_match	ENSMUSG00000022223	ENSMUST00000226746	501	3	coding	143	432	1446	1877	56135491	56135060	FALSE	TRUE	TRUE	Full	1	31	3.42035	0.0191202	F	0	0	0	0	0	0	0	0	0	0	0	0	0	0	0	0	2	0	0	0	0	0	0	0
G10407.35	14	-	2055	2	novel_in_catalog	ENSMUSG00000022223	novel	498	6	coding	143	432	1308	1739	56135491	56135060	FALSE	TRUE	TRUE	Full	1	31	3.49114	0.0195159	F	0	0	0	0	0	0	0	0	0	0	0	0	0	0	0	0	0	0	0	0	0	0	0	0
G10407.4	14	-	1225	6	novel_not_in_catalog	ENSMUSG00000022223	novel	1255	6	coding	152	459	448	906	56135758	56135060	FALSE	TRUE	TRUE	Full	3	31	3.16282	0.0176806	F	0	0	0	0	0	0	0	0	0	0	0	0	0	0	0	0	0	0	2	0	0	0	2	0
G10407.5	14	-	1084	5	novel_in_catalog	ENSMUSG00000022223	novel	1255	6	coding	245	738	28	765	56137662	56135060	FALSE	TRUE	TRUE	Full	1	31	3.61348	0.0201998	F	0	0	0	0	0	0	0	0	0	0	0	2	0	0	0	0	0	0	0	0	0	0	0	0
G10407.6	14	-	1349	4	full-splice_match	ENSMUSG00000022223	ENSMUST00000227387	416	4	coding	123	372	659	1030	56135431	56135060	FALSE	TRUE	TRUE	Full	7	31	3.79865	0.0212349	F	0	0	2	0	0	0	3	0	0	0	0	2	0	2	0	0	0	0	0	0	2	0	0	0
G10407.7	14	-	1711	3	full-splice_match	ENSMUSG00000022223	ENSMUST00000227965	709	3	coding	143	432	961	1392	56135491	56135060	FALSE	TRUE	TRUE	Full	1	31	3.17608	0.0177547	F	0	0	0	0	0	0	0	0	0	0	0	0	0	0	0	0	0	0	2	0	0	0	0	0
G10407.8	14	-	2520	3	incomplete-splice_match	ENSMUSG00000022223	ENSMUST00000228151	385	4	coding	143	432	1770	2201	56135491	56135060	FALSE	TRUE	TRUE	Full	9	31	3.94636	0.0220607	F	0	0	3	0	0	0	3	0	2	0	0	0	0	0	2	0	0	0	0	2	0	3	2	2
G10407.9	14	-	1301	6	novel_in_catalog	ENSMUSG00000022223	novel	1023	6	coding	186	561	423	983	56135850	56135060	FALSE	TRUE	TRUE	Full	2	31	5.77053	0.0322579	F	0	0	0	0	0	0	0	0	0	0	0	0	0	0	0	0	0	2	0	0	0	0	0	0
G10409.1	14	-	969	5	full-splice_match	ENSMUSG00000022225	ENSMUST00000022834	1074	5	coding	247	744	31	774	56181989	56179111	FALSE	TRUE	TRUE	Full	1	1	3.1072	1	T	0	0	0	0	0	0	0	0	0	0	0	0	0	0	0	0	0	0	0	0	0	0	0	0
G1041.1	1	-	1247	6	full-splice_match	ENSMUSG00000052760	ENSMUST00000159320	1798	6	non_coding	NA	NA	NA	NA	NA	NA	NA	TRUE	TRUE	Full	1	2	3.15622	0.319512	F	0	0	0	0	0	0	0	0	0	0	0	0	0	0	0	0	0	0	0	0	0	0	0	0
G1041.2	1	-	1338	6	full-splice_match	ENSMUSG00000052760	ENSMUST00000064788	1353	6	coding	229	690	141	830	85654335	85645914	FALSE	TRUE	TRUE	Full	1	2	6.72203	0.680488	T	0	0	0	0	0	0	0	0	0	0	0	0	0	0	0	0	0	0	0	0	0	0	0	0
G10410.1	14	-	990	5	full-splice_match	ENSMUSG00000061068	ENSMUST00000043249	1108	5	coding	246	741	37	777	56299731	56297414	FALSE	TRUE	TRUE	Full	14	1	4.53017	1	T	0	0	0	4	2	2	0	0	0	0	0	0	0	0	0	0	0	0	0	3	0	0	0	0
G10412.5	14	+	980	4	incomplete-splice_match	ENSMUSG00000054509	ENSMUST00000161553	6387	35	coding	79	240	374	613	56893025	56896887	FALSE	TRUE	TRUE	Full	4	1	3.57095	1	T	0	0	0	0	0	0	0	0	0	0	0	0	0	0	0	2	0	0	0	0	0	0	0	0
G10414.11	14	+	2913	14	full-splice_match	ENSMUSG00000079184	ENSMUST00000116468	2939	14	coding	858	2577	82	2658	56905809	56934629	FALSE	TRUE	TRUE	Full	38	12	9.33106	0.0762729	F	4	2	3	6	5	3	2	7	6	5	9	11	20	10	7	0	0	5	3	0	2	6	3	0
G10414.12	14	+	1300	3	incomplete-splice_match	ENSMUSG00000079184	ENSMUST00000116468	2939	14	coding	406	1218	82	1299	56905809	56912196	FALSE	TRUE	FALSE	Full	48	12	22.2561	0.181924	F	10	8	19	12	8	11	13	18	12	15	9	15	32	17	14	11	20	10	15	24	15	8	9	5
G10414.13	14	+	2949	14	novel_not_in_catalog	ENSMUSG00000079184	novel	2939	14	coding	870	2613	82	2694	56905809	56934629	FALSE	TRUE	TRUE	Full	13	12	4.97981	0.0407054	F	0	0	0	0	4	0	0	0	0	0	0	3	0	5	0	0	0	0	0	0	2	0	0	0
G10414.14	14	+	1336	3	incomplete-splice_match	ENSMUSG00000079184	ENSMUST00000116468	2939	14	coding	418	1254	82	1335	56905809	56912232	FALSE	TRUE	FALSE	Full	42	12	9.58182	0.0783226	F	5	5	6	0	3	5	0	10	5	4	3	3	9	3	5	6	8	4	11	0	6	6	0	5
G10414.19	14	+	946	2	full-splice_match	ENSMUSG00000079184	ENSMUST00000130246	416	2	coding	232	696	250	945	56911501	56912196	FALSE	TRUE	FALSE	Full	33	12	6.31943	0.0516555	F	5	0	2	2	0	0	2	7	0	0	2	4	0	2	2	10	0	2	3	10	2	2	0	5
G10414.20	14	+	2592	13	novel_not_in_catalog	ENSMUSG00000079184	novel	2939	14	coding	696	2091	249	2339	56911501	56934629	FALSE	TRUE	TRUE	Full	9	12	3.51516	0.0287332	F	0	0	0	0	0	0	0	2	0	0	0	2	0	0	0	0	0	2	0	0	0	0	0	0
G10414.25	14	+	2040	12	incomplete-splice_match	ENSMUSG00000079184	ENSMUST00000116468	2939	14	coding	382	1149	637	1785	56916134	56934629	FALSE	TRUE	TRUE	Full	48	12	38.7668	0.316883	T	31	30	28	38	10	14	7	25	46	28	38	57	57	42	22	13	32	26	17	27	27	36	25	9
G10414.26	14	+	1950	12	novel_not_in_catalog	ENSMUSG00000079184	novel	2939	14	coding	453	1362	334	1695	56912230	56934629	FALSE	TRUE	TRUE	Full	46	12	12.5277	0.102403	F	16	16	9	6	4	3	0	10	10	4	11	14	10	4	6	2	17	7	2	8	10	10	9	2
G10414.27	14	+	3735	11	novel_not_in_catalog	ENSMUSG00000079184	novel	2939	14	coding	309	930	330	1259	56912230	56926704	TRUE	TRUE	TRUE	Full	1	12	3.77923	0.0308917	F	0	0	0	0	0	0	0	0	0	0	0	0	0	0	0	0	0	0	0	0	0	0	0	0
G10414.29	14	+	1605	11	incomplete-splice_match	ENSMUSG00000079184	ENSMUST00000116468	2939	14	coding	382	1149	202	1350	56916134	56934629	FALSE	TRUE	TRUE	Full	6	12	4.35583	0.0356049	F	0	0	0	0	0	0	0	3	0	0	0	0	0	0	0	0	2	0	0	2	0	0	0	0
G10414.30	14	+	1436	10	incomplete-splice_match	ENSMUSG00000079184	ENSMUST00000116468	2939	14	coding	382	1149	35	1183	56916134	56934629	FALSE	TRUE	TRUE	Full	1	12	3.78186	0.0309133	F	0	0	0	0	0	0	0	0	0	0	0	0	0	0	0	2	0	0	0	0	0	0	0	0
G10414.8	14	+	678	3	incomplete-splice_match	ENSMUSG00000079184	ENSMUST00000116468	2939	14	coding	199	597	82	678	56905809	56911575	FALSE	TRUE	TRUE	Full	1	12	3.14305	0.0256916	F	0	0	0	0	0	0	0	0	0	0	0	0	0	0	0	0	0	0	0	0	0	0	0	0
G10415.1	14	-	3488	9	fusion	ENSMUSG00000097743_ENSMUSG00000021938	novel	601	5	coding	391	1176	155	1330	57015616	56938446	TRUE	TRUE	TRUE	Full	7	8	5.29759	0.0436606	F	6	0	0	0	0	0	0	0	2	0	4	0	0	0	0	0	0	2	0	0	0	0	0	2
G10415.10	14	-	1843	8	incomplete-splice_match	ENSMUSG00000021938	ENSMUST00000022507	4114	9	coding	290	873	325	1197	57001673	56960552	FALSE	TRUE	TRUE	Full	1	8	3.3374	0.0275055	F	0	0	0	0	0	0	0	0	0	0	0	0	0	0	0	0	0	0	0	0	0	0	0	0
G10415.11	14	-	2371	9	full-splice_match	ENSMUSG00000021938	ENSMUST00000022507	4114	9	coding	523	1572	155	1726	57015616	56960552	FALSE	TRUE	TRUE	Full	48	8	69.8208	0.575434	T	48	39	27	48	13	15	47	36	31	42	43	14	19	30	37	19	42	43	11	59	40	47	56	29
G10415.14	14	-	2028	9	full-splice_match	ENSMUSG00000021938	ENSMUST00000022507	4114	9	coding	523	1572	155	1726	57015616	56960552	FALSE	TRUE	TRUE	Full	48	8	26.52	0.218567	F	22	16	21	13	13	9	12	7	15	21	15	17	7	22	16	6	19	11	10	16	15	15	12	10
G10415.15	14	-	1116	4	incomplete-splice_match	ENSMUSG00000021938	ENSMUST00000163924	2863	8	coding	318	954	161	1114	57015616	56999301	FALSE	TRUE	FALSE	Full	1	8	3.77923	0.0311468	F	0	0	0	0	0	0	0	0	0	0	0	0	0	0	0	0	0	0	0	0	0	0	0	0
G10415.3	14	-	3456	10	fusion	ENSMUSG00000097743_ENSMUSG00000021938	novel	601	5	coding	391	1176	164	1339	57015616	56938446	TRUE	TRUE	TRUE	Partial	3	8	5.3658	0.0442227	F	0	0	0	0	0	0	0	0	0	0	0	0	0	0	0	0	0	0	0	0	0	0	0	0
G10415.5	14	-	3292	8	fusion	ENSMUSG00000097743_ENSMUSG00000021938	novel	601	5	coding	391	1176	186	1361	57015616	56938446	TRUE	TRUE	TRUE	Full	4	8	4.14855	0.0341906	F	0	3	0	0	2	3	0	0	2	0	0	0	0	0	0	0	0	0	0	0	0	0	0	0
G10415.6	14	-	2457	3	novel_not_in_catalog	ENSMUSG00000097743	novel	1299	3	non_coding	NA	NA	NA	NA	NA	NA	NA	TRUE	TRUE	Full	1	8	3.06646	0.0252725	F	0	0	0	0	0	0	0	0	0	0	0	0	0	0	0	0	0	0	0	0	0	2	0	0
G10419.10	14	-	1947	3	incomplete-splice_match	ENSMUSG00000040123	ENSMUST00000173954	5357	8	coding	283	852	254	1105	57034177	57031223	FALSE	TRUE	FALSE	Full	2	12	3.5832	0.0662775	F	0	0	0	0	0	0	0	0	2	0	0	0	0	0	0	0	0	0	0	0	0	0	0	0
G10419.12	14	-	3062	9	novel_not_in_catalog	ENSMUSG00000040123	novel	5290	8	coding	627	1884	337	2220	57042276	57031223	FALSE	TRUE	FALSE	Full	1	12	3.1072	0.057473	F	0	0	0	0	0	0	0	0	0	0	0	0	0	0	0	0	0	0	0	0	0	0	0	0
G10419.13	14	-	3049	8	full-splice_match	ENSMUSG00000040123	ENSMUST00000111285	5351	8	coding	627	1884	324	2207	57042276	57031223	FALSE	TRUE	FALSE	Full	10	12	4.41847	0.0817273	F	0	0	0	0	0	0	0	0	0	0	0	0	0	0	0	0	0	0	0	0	0	0	0	0
G10419.14	14	-	2902	7	novel_in_catalog	ENSMUSG00000040123	novel	5357	8	coding	627	1884	177	2060	57042276	57031223	FALSE	TRUE	FALSE	Full	14	12	4.40365	0.0814531	F	0	3	2	3	0	0	3	0	0	3	0	3	0	4	3	0	0	0	0	0	0	0	0	0
G10419.15	14	-	2560	7	novel_not_in_catalog	ENSMUSG00000040123	novel	5290	8	coding	371	1116	603	1718	57036377	57031223	FALSE	TRUE	FALSE	Full	1	12	3.61348	0.0668376	F	0	0	0	0	0	0	0	0	0	0	0	2	0	0	0	0	0	0	0	0	0	0	0	0
G10419.17	14	-	2985	8	full-splice_match	ENSMUSG00000040123	ENSMUST00000039812	5290	8	coding	627	1884	261	2144	57042276	57031223	FALSE	TRUE	FALSE	Full	1	12	3.092	0.0571919	F	0	0	0	0	0	0	0	0	0	0	0	0	0	0	0	0	0	0	0	0	0	0	0	0
G10419.18	14	-	3129	8	full-splice_match	ENSMUSG00000040123	ENSMUST00000173954	5357	8	coding	627	1884	405	2288	57042276	57031223	FALSE	FALSE	FALSE	Full	3	12	3.40572	0.0629947	F	0	0	0	2	0	0	0	0	0	0	2	0	0	0	0	0	0	0	0	0	0	0	0	0
G10419.19	14	-	2912	7	novel_in_catalog	ENSMUSG00000040123	novel	5290	8	coding	627	1884	189	2072	57042276	57031223	FALSE	TRUE	FALSE	Full	37	12	13.267	0.245396	T	9	10	7	6	13	11	10	2	6	12	12	4	3	7	2	2	0	0	0	0	0	0	0	0
G10419.20	14	-	2829	7	novel_not_in_catalog	ENSMUSG00000040123	novel	5357	8	coding	627	1884	107	1990	57042276	57031223	FALSE	TRUE	FALSE	Full	1	12	3.46801	0.0641468	F	0	0	0	0	0	0	0	0	0	0	0	0	0	0	0	0	0	0	0	0	0	0	0	0
G10419.21	14	-	2511	7	novel_not_in_catalog	ENSMUSG00000040123	novel	5357	8	coding	371	1116	578	1693	57036377	57031223	FALSE	TRUE	FALSE	Full	1	12	3.78186	0.0699521	F	0	0	0	0	0	0	0	0	0	0	0	0	0	0	0	2	0	0	0	0	0	0	0	0
G10419.32	14	-	1479	7	novel_in_catalog	ENSMUSG00000040123	novel	5290	8	coding	425	1275	204	1478	57042276	57031832	FALSE	TRUE	FALSE	Full	7	12	3.96349	0.0733117	F	0	0	0	0	0	0	0	0	0	0	0	0	0	0	0	0	2	0	0	0	2	0	0	0
G10419.33	14	-	1371	7	novel_in_catalog	ENSMUSG00000040123	novel	5290	8	coding	394	1182	189	1370	57042276	57031925	FALSE	TRUE	FALSE	Full	8	12	3.95954	0.0732385	F	0	0	0	0	0	0	2	0	0	0	0	0	0	0	0	0	0	0	0	0	0	0	0	0
G1042.10	1	+	3802	9	full-splice_match	ENSMUSG00000036707	ENSMUST00000113360	3805	9	coding	319	960	494	1453	85746187	85776942	FALSE	TRUE	TRUE	Full	25	4	14.9619	0.508227	T	19	39	5	6	6	9	5	3	20	2	2	14	3	15	4	3	0	0	0	0	0	0	0	0
G1042.14	1	+	2802	4	incomplete-splice_match	ENSMUSG00000036707	ENSMUST00000113360	3805	9	coding	96	291	155	445	85776040	85776942	FALSE	TRUE	TRUE	Full	1	4	2.88641	0.0980456	F	0	0	0	0	0	0	0	0	0	0	0	0	0	0	0	0	0	0	0	0	0	0	0	0
G1042.15	1	+	2754	3	incomplete-splice_match	ENSMUSG00000036707	ENSMUST00000113360	3805	9	coding	96	291	109	399	85776040	85776942	FALSE	TRUE	TRUE	Full	1	4	3.06646	0.104162	F	0	0	0	0	0	0	0	0	0	0	0	0	0	0	0	0	0	0	0	0	0	2	0	0
G1042.8	1	+	3925	10	novel_in_catalog	ENSMUSG00000036707	novel	3805	9	coding	341	1026	545	1570	85746121	85776942	FALSE	TRUE	TRUE	Full	2	4	8.52465	0.289566	F	0	8	0	0	0	0	0	0	0	0	0	0	0	0	0	0	0	0	0	0	0	0	0	0
G10422.2	14	+	4745	25	novel_in_catalog	ENSMUSG00000021945	novel	6974	24	coding	1376	4131	177	4307	57140163	57197364	FALSE	TRUE	TRUE	Full	10	4	4.5875	0.317677	T	0	2	0	0	2	2	2	0	5	0	3	2	0	5	0	0	0	0	0	0	0	0	0	0
G10422.3	14	+	4908	25	novel_not_in_catalog	ENSMUSG00000021945	novel	6974	24	coding	1376	4131	340	4470	57140163	57197364	FALSE	TRUE	TRUE	Full	4	4	3.43689	0.237999	F	0	0	0	2	2	0	0	0	0	0	0	0	0	0	0	0	0	0	0	0	0	0	0	0
G10422.5	14	+	4822	26	novel_not_in_catalog	ENSMUSG00000021945	novel	6974	24	coding	1402	4209	174	4382	57140163	57197364	FALSE	TRUE	TRUE	Full	1	4	3.092	0.214116	F	0	0	0	0	0	0	0	0	0	0	0	0	0	0	0	0	0	0	0	0	0	0	0	0
G10422.6	14	+	4975	25	novel_not_in_catalog	ENSMUSG00000021945	novel	6974	24	coding	1376	4131	214	4344	57140163	57197364	FALSE	TRUE	TRUE	Full	1	4	3.32437	0.230208	F	0	0	0	0	0	0	0	0	0	0	0	0	0	0	0	0	0	0	0	0	0	0	0	0
G10425.10	14	-	1425	2	full-splice_match	ENSMUSG00000046352	ENSMUST00000055698	2406	2	coding	226	681	257	937	57338206	57337526	FALSE	TRUE	FALSE	Full	1	10	3.36131	0.0432097	F	0	0	0	0	2	0	0	0	0	0	0	0	0	0	0	0	0	0	0	0	0	0	0	0
G10425.11	14	-	1244	2	novel_not_in_catalog	ENSMUSG00000089840	novel	1523	2	non_coding	NA	NA	NA	NA	NA	NA	NA	TRUE	TRUE	Full	4	10	6.3366	0.0814572	F	0	0	0	0	0	0	0	0	0	0	0	0	0	0	0	0	0	0	0	0	0	0	0	0
G10425.12	14	-	1526	2	full-splice_match	ENSMUSG00000089840	ENSMUST00000159455	1523	2	coding	125	378	96	473	57351390	57351013	FALSE	TRUE	TRUE	Full	16	10	6.42084	0.0825401	F	0	2	2	0	0	3	0	0	0	0	0	0	0	0	0	0	0	0	3	0	0	0	0	0
G10425.3	14	-	2403	2	novel_not_in_catalog	ENSMUSG00000046352	novel	2406	2	coding	226	681	257	937	57338206	57337526	FALSE	TRUE	TRUE	Full	1	10	3.31681	0.0426377	F	2	0	0	0	0	0	0	0	0	0	0	0	0	0	0	0	0	0	0	0	0	0	0	0
G10425.4	14	-	2392	2	full-splice_match	ENSMUSG00000046352	ENSMUST00000055698	2406	2	coding	226	681	257	937	57338206	57337526	FALSE	TRUE	TRUE	Full	47	10	26.7151	0.343423	T	22	20	22	21	12	21	14	4	32	37	22	23	6	25	20	4	16	17	6	9	9	0	22	9
G10425.5	14	-	2246	2	fusion	ENSMUSG00000089840_ENSMUSG00000046352	novel	2406	2	coding	226	681	117	797	57338206	57337526	FALSE	TRUE	TRUE	Full	6	10	4.56516	0.0586852	F	0	0	0	0	0	0	0	0	0	0	0	0	0	0	0	0	0	0	0	0	0	0	0	0
G10425.6	14	-	2289	2	full-splice_match	ENSMUSG00000046352	ENSMUST00000055698	2406	2	coding	226	681	257	937	57338206	57337526	FALSE	TRUE	TRUE	Full	46	10	15.0973	0.194076	F	7	12	9	11	6	9	3	2	23	25	7	10	5	12	16	5	7	13	5	8	10	2	10	3
G10425.7	14	-	2149	2	fusion	ENSMUSG00000089840_ENSMUSG00000046352	novel	2406	2	coding	226	681	117	797	57338206	57337526	FALSE	TRUE	TRUE	Full	5	10	3.95357	0.0508233	F	0	0	0	0	0	0	2	0	0	0	0	0	0	0	0	0	2	0	0	0	0	0	0	0
G10425.8	14	-	2042	2	full-splice_match	ENSMUSG00000046352	ENSMUST00000055698	2406	2	coding	226	681	257	937	57338206	57337526	FALSE	TRUE	TRUE	Full	18	10	4.53277	0.0582689	F	0	2	0	0	2	0	0	0	2	3	0	0	0	2	3	0	0	0	0	0	0	0	0	0
G10425.9	14	-	1901	2	fusion	ENSMUSG00000089840_ENSMUSG00000046352	novel	2406	2	coding	226	681	117	797	57338206	57337526	FALSE	TRUE	TRUE	Full	1	10	3.49114	0.0448787	F	0	0	0	0	0	0	0	0	0	0	0	0	0	0	0	0	0	0	0	0	0	0	0	0
G10427.10	14	-	2187	3	full-splice_match	ENSMUSG00000040055	ENSMUST00000160703	887	3	coding	261	786	689	1474	57362259	57361474	FALSE	TRUE	TRUE	Full	29	12	15.7874	0.0644735	F	12	0	18	10	3	2	0	3	0	5	0	0	0	5	0	0	2	4	0	3	4	4	2	0
G10427.11	14	-	1667	2	incomplete-splice_match	ENSMUSG00000040055	ENSMUST00000039380	2105	3	coding	261	786	169	954	57362259	57361474	FALSE	TRUE	TRUE	Full	36	12	11.3737	0.0464485	F	4	5	4	4	16	4	6	0	8	4	6	11	0	10	12	3	18	10	0	0	0	7	3	0
G10427.15	14	-	1948	4	novel_not_in_catalog	ENSMUSG00000040055	novel	2105	3	coding	261	786	450	1235	57362259	57361474	FALSE	TRUE	TRUE	Full	1	12	2.85755	0.0116698	F	0	0	0	0	0	0	0	0	0	0	0	0	0	0	0	0	0	0	0	2	0	0	0	0
G10427.18	14	-	2238	3	full-splice_match	ENSMUSG00000040055	ENSMUST00000039380	2105	3	coding	261	786	740	1525	57362259	57361474	FALSE	TRUE	TRUE	Full	48	12	179.62	0.733543	T	104	98	82	137	133	97	109	50	83	104	52	79	66	97	139	59	116	131	110	140	120	113	115	59
G10427.19	14	-	1603	2	novel_in_catalog	ENSMUSG00000040055	novel	2105	3	coding	261	786	105	890	57362259	57361474	FALSE	TRUE	TRUE	Full	2	12	3.35669	0.0137082	F	0	0	0	0	0	0	0	0	0	0	0	0	0	0	0	0	0	0	0	0	0	0	0	0
G10427.20	14	-	1624	2	novel_in_catalog	ENSMUSG00000040055	novel	2105	3	coding	261	786	126	911	57362259	57361474	FALSE	TRUE	TRUE	Full	7	12	5.64081	0.0230362	F	0	0	0	0	0	0	0	2	0	0	0	0	0	0	0	0	4	0	0	0	0	0	0	0
G10427.22	14	-	1853	4	novel_not_in_catalog	ENSMUSG00000040055	novel	2105	3	coding	261	786	357	1142	57362259	57361474	FALSE	TRUE	TRUE	Full	1	12	3.19754	0.0130583	F	0	0	0	0	0	0	0	0	0	0	0	0	0	0	0	0	0	2	0	0	0	0	0	0
G10427.26	14	-	1697	3	full-splice_match	ENSMUSG00000040055	ENSMUST00000039380	2105	3	coding	261	786	598	1383	57362259	57361474	FALSE	TRUE	TRUE	Full	1	12	3.20782	0.0131002	F	0	0	0	0	0	0	0	0	0	0	0	0	0	0	2	0	0	0	0	0	0	0	0	0
G10427.5	14	-	1770	3	novel_not_in_catalog	ENSMUSG00000040055	novel	2105	3	coding	169	510	548	1057	57361983	57361474	FALSE	TRUE	TRUE	Full	1	12	3.01633	0.0123182	F	0	0	0	0	0	0	0	0	0	0	0	0	0	0	0	0	0	0	0	0	0	0	0	0
G10427.6	14	-	2418	4	novel_not_in_catalog	ENSMUSG00000040055	novel	2105	3	coding	261	786	920	1705	57362259	57361474	FALSE	TRUE	TRUE	Full	1	12	3.76427	0.0153727	F	0	0	0	0	0	0	0	0	0	0	0	0	0	0	0	0	0	0	0	0	0	0	0	0
G10427.7	14	-	1738	2	incomplete-splice_match	ENSMUSG00000040055	ENSMUST00000160703	887	3	coding	261	786	240	1025	57362259	57361474	FALSE	TRUE	TRUE	Full	11	12	5.27272	0.021533	F	0	0	3	0	0	2	3	0	0	0	0	0	0	0	0	0	2	0	3	0	0	0	0	0
G10427.9	14	-	1859	3	novel_in_catalog	ENSMUSG00000040055	novel	887	3	coding	261	786	361	1146	57362259	57361474	FALSE	TRUE	TRUE	Full	30	12	7.77173	0.0317386	F	5	2	8	0	2	0	2	3	2	0	0	2	5	3	2	0	2	3	2	0	4	3	4	0
G10429.10	14	-	1227	6	incomplete-splice_match	ENSMUSG00000021947	ENSMUST00000022517	1497	8	coding	267	804	10	813	57600498	57512906	FALSE	TRUE	TRUE	Full	1	10	3.1072	0.0235053	F	0	0	0	0	0	0	0	0	0	0	0	0	0	0	0	0	0	0	0	0	0	0	0	0
G10429.11	14	-	1356	7	novel_in_catalog	ENSMUSG00000021947	novel	1497	8	coding	151	456	487	942	57541178	57512906	FALSE	TRUE	TRUE	Full	3	10	4.28179	0.0323909	F	0	0	3	0	0	0	0	0	0	0	0	0	0	0	0	0	0	0	3	0	0	0	2	0
G10429.12	14	-	1287	7	novel_in_catalog	ENSMUSG00000021947	novel	1497	8	coding	265	798	76	873	57635905	57512906	FALSE	TRUE	TRUE	Full	3	10	3.28551	0.0248542	F	0	0	0	0	0	0	0	0	2	2	0	0	0	0	0	0	0	0	0	2	0	0	0	0
G10429.13	14	-	1254	7	novel_in_catalog	ENSMUSG00000021947	novel	1497	8	coding	254	765	76	840	57635905	57512906	FALSE	TRUE	TRUE	Full	21	10	10.4299	0.0789003	F	0	0	0	0	0	3	0	0	0	0	3	0	0	0	0	3	7	6	2	0	0	12	2	3
G10429.14	14	-	1719	9	novel_not_in_catalog	ENSMUSG00000021947	novel	1497	8	coding	319	960	348	1307	57628121	57512906	FALSE	TRUE	TRUE	Full	1	10	4.19992	0.0317715	F	0	0	0	0	0	0	0	0	0	0	0	0	0	0	0	0	0	0	0	0	0	0	0	0
G10429.15	14	-	1101	5	incomplete-splice_match	ENSMUSG00000021947	ENSMUST00000022517	1497	8	coding	151	456	234	689	57541178	57512906	FALSE	TRUE	TRUE	Full	1	10	3.07509	0.0232624	F	0	0	0	0	0	0	0	0	0	0	0	0	0	0	0	0	0	0	0	0	2	0	0	0
G10429.4	14	-	1533	9	novel_not_in_catalog	ENSMUSG00000021947	novel	1497	8	coding	347	1044	76	1119	57635905	57512906	FALSE	TRUE	TRUE	Full	1	10	9.393	0.0710561	F	0	0	0	0	0	0	0	0	0	0	0	0	4	0	0	0	0	0	0	0	0	0	0	0
G10429.6	14	-	1554	9	novel_in_catalog	ENSMUSG00000021947	novel	1497	8	coding	354	1065	76	1140	57635905	57512906	FALSE	TRUE	TRUE	Full	1	10	4.61263	0.0348936	F	0	0	0	0	0	0	0	0	0	0	0	0	0	0	0	0	0	0	0	0	3	0	0	0
[truncated: 115,891 more rows]
[truncated: 31 more columns]
