# Supplementary material for: Full-length RNA transcript sequencing traces brain isoform diversity in house mouse natural populations
Source: HighWire-hosted journal article supplement (doi:10.1101/gr.279166.124), 2024-09-17
Supplement: Supplemental_Data_S4.xlsx [file Supplemental_Data_S4.xlsx]

## Sheet: Data S4
Supplemental Data S4 Statistics on the known and novel isoforms for each mouse individual. Known isoforms are defined as those structural category code being FSM, ISM; Novel isoforms are defined as those structural category code being NIC, NNC, F, G, I, A.
Species	Subspecies	Population (Geographic region)	Individual ID	Known isoform (FSM, ISM)		Novel isoform (NIC, NNC, F, G, I, A)
				# of isoform (%)	# of supporting FLNC reads(%)	# of isoform (%)	# of supporting FLNC reads(%)
Mus musculus	Mus mus domesticus	Germany	GE1	17922(74.4%)	565061(93.7%)	6156(25.6%)	37928(6.3%)
Mus musculus	Mus mus domesticus	Germany	GE2	18496(72.9%)	600232(92.9%)	6882(27.1%)	45528(7.1%)
Mus musculus	Mus mus domesticus	Germany	GE3	18591(74.4%)	590829(93.4%)	6412(25.6%)	41542(6.6%)
Mus musculus	Mus mus domesticus	Germany	GE4	18198(74.4%)	626361(94.0%)	6270(25.6%)	40175(6.0%)
Mus musculus	Mus mus domesticus	Germany	GE5	16412(76.4%)	562173(94.5%)	5065(23.6%)	32833(5.5%)
Mus musculus	Mus mus domesticus	Germany	GE6	17071(75.1%)	553656(93.6%)	5652(24.9%)	37614(6.4%)
Mus musculus	Mus mus domesticus	Germany	GE7	15381(76.9%)	515659(94.8%)	4609(23.1%)	28276(5.2%)
Mus musculus	Mus mus domesticus	Germany	GE8	16055(76.1%)	539471(94.6%)	5046(23.9%)	30531(5.4%)
Mus musculus	Mus mus domesticus	France	FR1	17393(73.8%)	531446(93.4%)	6166(26.2%)	37808(6.6%)
Mus musculus	Mus mus domesticus	France	FR2	16327(74.6%)	539169(94.0%)	5556(25.4%)	34620(6.0%)
Mus musculus	Mus mus domesticus	France	FR3	17324(74.5%)	519340(93.3%)	5933(25.5%)	37331(6.7%)
Mus musculus	Mus mus domesticus	France	FR4	16653(75.8%)	521270(94.2%)	5322(24.2%)	32213(5.8%)
Mus musculus	Mus mus domesticus	France	FR5	14548(79.1%)	404250(94.9%)	3839(20.9%)	21599(5.1%)
Mus musculus	Mus mus domesticus	France	FR6	17916(74.4%)	674979(94.4%)	6170(25.6%)	40297(5.6%)
Mus musculus	Mus mus domesticus	France	FR7	16438(75.1%)	589924(94.6%)	5447(24.9%)	33553(5.4%)
Mus musculus	Mus mus domesticus	France	FR8	13846(77.6%)	505097(95.5%)	3995(22.4%)	23743(4.5%)
Mus musculus	Mus mus domesticus	Iran	IR1	16683(75.0%)	550162(94.1%)	5572(25.0%)	34573(5.9%)
Mus musculus	Mus mus domesticus	Iran	IR2	17129(74.9%)	587058(93.9%)	5753(25.1%)	38423(6.1%)
Mus musculus	Mus mus domesticus	Iran	IR3	15772(77.7%)	601076(95.5%)	4534(22.3%)	28632(4.5%)
Mus musculus	Mus mus domesticus	Iran	IR4	17540(74.0%)	659661(94.3%)	6161(26.0%)	40240(5.7%)
Mus musculus	Mus mus domesticus	Iran	IR5	16860(74.6%)	610783(93.9%)	5748(25.4%)	39605(6.1%)
Mus musculus	Mus mus domesticus	Iran	IR6	16880(74.0%)	612691(93.9%)	5931(26.0%)	39527(6.1%)
Mus musculus	Mus mus domesticus	Iran	IR7	16365(74.0%)	562800(93.9%)	5757(26.0%)	36503(6.1%)
Mus musculus	Mus mus domesticus	Iran	IR8	13512(77.6%)	432607(94.8%)	3909(22.4%)	23888(5.2%)
Mus musculus	Mus mus musculus	Kazakhstan	KA1	16709(74.2%)	626130(94.4%)	5823(25.8%)	36928(5.6%)
Mus musculus	Mus mus musculus	Kazakhstan	KA2	14635(77.1%)	424233(94.5%)	4349(22.9%)	24781(5.5%)
Mus musculus	Mus mus musculus	Kazakhstan	KA3	16159(74.4%)	537013(93.7%)	5556(25.6%)	35866(6.3%)
Mus musculus	Mus mus musculus	Kazakhstan	KA4	16105(73.2%)	563794(93.7%)	5886(26.8%)	37823(6.3%)
Mus musculus	Mus mus musculus	Kazakhstan	KA5	16833(72.2%)	604043(93.4%)	6484(27.8%)	42787(6.6%)
Mus musculus	Mus mus musculus	Kazakhstan	KA6	17061(73.3%)	634839(93.9%)	6207(26.7%)	41191(6.1%)
Mus musculus	Mus mus musculus	Kazakhstan	KA7	17166(72.6%)	680655(93.9%)	6467(27.4%)	44265(6.1%)
Mus musculus	Mus mus musculus	Kazakhstan	KA8	17225(73.0%)	651172(94.0%)	6375(27.0%)	41731(6.0%)
Mus musculus	Mus mus castaneus	Taiwan	TA1	14111(75.3%)	447184(93.9%)	4634(24.7%)	29016(6.1%)
Mus musculus	Mus mus castaneus	Taiwan	TA2	16505(72.5%)	594017(93.4%)	6245(27.5%)	41851(6.6%)
Mus musculus	Mus mus castaneus	Taiwan	TA3	16793(71.3%)	639181(93.2%)	6754(28.7%)	46312(6.8%)
Mus musculus	Mus mus castaneus	Taiwan	TA4	15989(72.5%)	631780(94.0%)	6077(27.5%)	40448(6.0%)
Mus musculus	Mus mus castaneus	Taiwan	TA5	15295(76.6%)	499930(94.5%)	4668(23.4%)	29279(5.5%)
Mus musculus	Mus mus castaneus	Taiwan	TA6	16057(75.4%)	565871(94.4%)	5248(24.6%)	33397(5.6%)
Mus musculus	Mus mus castaneus	Taiwan	TA7	15768(74.6%)	508472(93.8%)	5374(25.4%)	33524(6.2%)
Mus musculus	Mus mus castaneus	Taiwan	TA8	15601(75.3%)	520357(94.2%)	5113(24.7%)	31918(5.8%)
Mus spicilegus	-	Slovakia	SL1	15456(73.6%)	517220(93.7%)	5554(26.4%)	34689(6.3%)
Mus spicilegus	-	Slovakia	SL2	15463(74.6%)	497659(93.7%)	5255(25.4%)	33653(6.3%)
Mus spicilegus	-	Slovakia	SL3	15454(72.2%)	538201(93.3%)	5963(27.8%)	38499(6.7%)
Mus spicilegus	-	Slovakia	SL4	14434(74.3%)	514940(94.1%)	4996(25.7%)	32551(5.9%)
Mus spretus	-	Spain	SP1	15709(72.4%)	594157(93.4%)	5997(27.6%)	42167(6.6%)
Mus spretus	-	Spain	SP2	15814(72.2%)	591176(93.3%)	6080(27.8%)	42493(6.7%)
Mus spretus	-	Spain	SP3	15914(71.6%)	599800(93.2%)	6311(28.4%)	43867(6.8%)
Mus spretus	-	Spain	SP4	14997(72.3%)	555413(93.3%)	5738(27.7%)	39645(6.7%)
