# Supplementary material for: Full-length RNA transcript sequencing traces brain isoform diversity in house mouse natural populations
Source: HighWire-hosted journal article supplement (doi:10.1101/gr.279166.124), 2024-09-17
Supplement: Supplemental_Data_S5.xlsx [file Supplemental_Data_S5.xlsx]

## Sheet: Data S5
Supplemental Data S5 GO functional enrichment results of plenty-isoform genes. Only BP terms passing multiple-testing corrections (FDR<0.05) are listed.
GO_ID	GO_Term	Over_represented_pvalue	FDR
GO:0044237	cellular metabolic process	1.58573e-25	2.38431e-21
GO:0006412	translation	6.30677e-24	4.74143e-20
GO:0045184	establishment of protein localization	3.89951e-23	1.95444e-19
GO:0006396	RNA processing	6.92863e-23	2.60447e-19
GO:0046907	intracellular transport	1.31907e-22	3.96671e-19
GO:0043043	peptide biosynthetic process	2.16172e-22	5.41727e-19
GO:0043604	amide biosynthetic process	2.599e-22	5.58264e-19
GO:0044238	primary metabolic process	8.22491e-22	1.54587e-18
GO:0006518	peptide metabolic process	2.00593e-21	3.24878e-18
GO:0002181	cytoplasmic translation	2.16067e-21	3.24878e-18
GO:0006807	nitrogen compound metabolic process	4.47644e-21	6.11888e-18
GO:0015031	protein transport	4.9252e-21	6.17128e-18
GO:0044260	cellular macromolecule metabolic process	1.17167e-20	1.35517e-17
GO:0043603	cellular amide metabolic process	1.32662e-20	1.39634e-17
GO:0008380	RNA splicing	1.393e-20	1.39634e-17
GO:0034641	cellular nitrogen compound metabolic process	1.54123e-20	1.44837e-17
GO:0008152	metabolic process	2.3059e-20	2.0395e-17
GO:1901566	organonitrogen compound biosynthetic process	4.44907e-20	3.71646e-17
GO:1901564	organonitrogen compound metabolic process	1.79992e-19	1.4244e-16
GO:0008104	protein localization	6.05379e-19	4.55124e-16
GO:0070727	cellular macromolecule localization	1.48289e-18	1.06175e-15
GO:0051641	cellular localization	3.6081e-18	2.46597e-15
GO:0071704	organic substance metabolic process	4.51392e-18	2.95093e-15
GO:0006397	mRNA processing	1.62199e-17	1.01618e-14
GO:0006886	intracellular protein transport	2.90841e-17	1.74923e-14
GO:0009987	cellular process	1.02264e-16	5.914e-14
GO:0051649	establishment of localization in cell	1.65722e-16	9.2289e-14
GO:0033036	macromolecule localization	1.92694e-16	1.03476e-13
GO:0016071	mRNA metabolic process	2.96562e-16	1.53762e-13
GO:0034645	cellular macromolecule biosynthetic process	3.47921e-16	1.74378e-13
GO:0000375	RNA splicing, via transesterification reactions	9.41567e-16	4.29012e-13
GO:0000377	RNA splicing, via transesterification reactions with bulged adenosine as nucleophile	9.41567e-16	4.29012e-13
GO:0000398	mRNA splicing, via spliceosome	9.41567e-16	4.29012e-13
GO:0071705	nitrogen compound transport	3.00146e-15	1.32735e-12
GO:1901575	organic substance catabolic process	6.0764e-15	2.61042e-12
GO:0009056	catabolic process	8.90698e-15	3.72015e-12
GO:0009057	macromolecule catabolic process	1.32853e-13	5.39886e-11
GO:0043632	modification-dependent macromolecule catabolic process	2.80899e-13	1.11147e-10
GO:0044265	cellular macromolecule catabolic process	4.26324e-13	1.64364e-10
GO:0019538	protein metabolic process	5.70349e-13	2.14394e-10
GO:0019941	modification-dependent protein catabolic process	7.80895e-13	2.86379e-10
GO:0044248	cellular catabolic process	9.14029e-13	3.27222e-10
GO:0006511	ubiquitin-dependent protein catabolic process	1.46303e-12	5.11583e-10
GO:0006413	translational initiation	2.19143e-12	7.48872e-10
GO:0051603	proteolysis involved in protein catabolic process	2.44301e-12	8.16292e-10
GO:0022613	ribonucleoprotein complex biogenesis	2.57072e-12	8.40291e-10
GO:0006139	nucleobase-containing compound metabolic process	4.20404e-12	1.34493e-09
GO:0046483	heterocycle metabolic process	4.82272e-12	1.51072e-09
GO:0010970	transport along microtubule	1.3645e-11	4.18707e-09
GO:0055086	nucleobase-containing small molecule metabolic process	1.50974e-11	4.54009e-09
GO:0030163	protein catabolic process	2.08728e-11	6.15378e-09
GO:0006725	cellular aromatic compound metabolic process	3.06402e-11	8.85973e-09
GO:0071702	organic substance transport	3.64842e-11	1.03505e-08
GO:0009150	purine ribonucleotide metabolic process	3.97201e-11	1.10598e-08
GO:0033365	protein localization to organelle	9.43062e-11	2.57816e-08
GO:0009058	biosynthetic process	1.13063e-10	3.01792e-08
GO:0006091	generation of precursor metabolites and energy	1.14406e-10	3.01792e-08
GO:1901360	organic cyclic compound metabolic process	1.33602e-10	3.46351e-08
GO:0006753	nucleoside phosphate metabolic process	1.40983e-10	3.59291e-08
GO:0009117	nucleotide metabolic process	1.65489e-10	4.14714e-08
GO:0009259	ribonucleotide metabolic process	2.04551e-10	5.04201e-08
GO:0019693	ribose phosphate metabolic process	2.63404e-10	6.38798e-08
GO:0070647	protein modification by small protein conjugation or removal	3.04114e-10	7.2582e-08
GO:0043170	macromolecule metabolic process	3.15603e-10	7.41469e-08
GO:1901565	organonitrogen compound catabolic process	3.61821e-10	8.36974e-08
GO:0006163	purine nucleotide metabolic process	4.00558e-10	9.12544e-08
GO:1901576	organic substance biosynthetic process	4.50203e-10	1.01034e-07
GO:0030705	cytoskeleton-dependent intracellular transport	4.89879e-10	1.08321e-07
GO:0043484	regulation of RNA splicing	5.09186e-10	1.10958e-07
GO:0044249	cellular biosynthetic process	1.20197e-09	2.58184e-07
GO:0072521	purine-containing compound metabolic process	1.21916e-09	2.58188e-07
GO:0044085	cellular component biogenesis	1.50621e-09	3.14547e-07
GO:0043933	protein-containing complex organization	1.86023e-09	3.83155e-07
GO:0090150	establishment of protein localization to membrane	2.29499e-09	4.66316e-07
GO:0006605	protein targeting	2.37309e-09	4.75758e-07
GO:0019637	organophosphate metabolic process	2.90887e-09	5.75497e-07
GO:0051179	localization	3.46307e-09	6.76243e-07
GO:0032446	protein modification by small protein conjugation	4.96687e-09	9.5746e-07
GO:0044271	cellular nitrogen compound biosynthetic process	6.0698e-09	1.15526e-06
GO:0009060	aerobic respiration	6.83756e-09	1.28512e-06
GO:0022618	ribonucleoprotein complex assembly	7.17412e-09	1.33173e-06
GO:0009205	purine ribonucleoside triphosphate metabolic process	7.28973e-09	1.33669e-06
GO:0034248	regulation of cellular amide metabolic process	8.13151e-09	1.47308e-06
GO:0099003	vesicle-mediated transport in synapse	1.04807e-08	1.87605e-06
GO:0016192	vesicle-mediated transport	1.0688e-08	1.89064e-06
GO:0065003	protein-containing complex assembly	1.15563e-08	2.02048e-06
GO:0008088	axo-dendritic transport	1.16939e-08	2.02104e-06
GO:0009144	purine nucleoside triphosphate metabolic process	1.30653e-08	2.23238e-06
GO:0034660	ncRNA metabolic process	1.40833e-08	2.37929e-06
GO:0006996	organelle organization	1.87795e-08	3.13743e-06
GO:0045333	cellular respiration	2.02919e-08	3.35285e-06
GO:0099111	microtubule-based transport	2.06115e-08	3.36864e-06
GO:0051650	establishment of vesicle localization	2.12683e-08	3.40617e-06
GO:0009141	nucleoside triphosphate metabolic process	2.13793e-08	3.40617e-06
GO:0051668	localization within membrane	2.15208e-08	3.40617e-06
GO:0009199	ribonucleoside triphosphate metabolic process	2.18982e-08	3.4298e-06
GO:0071840	cellular component organization or biogenesis	2.53612e-08	3.93125e-06
GO:0010498	proteasomal protein catabolic process	2.67348e-08	4.10188e-06
GO:0071826	ribonucleoprotein complex subunit organization	3.08849e-08	4.69076e-06
GO:0051648	vesicle localization	3.26534e-08	4.90976e-06
GO:0036465	synaptic vesicle recycling	3.38373e-08	4.99813e-06
GO:0044281	small molecule metabolic process	3.39059e-08	4.99813e-06
GO:0051234	establishment of localization	3.93397e-08	5.74283e-06
GO:0072657	protein localization to membrane	4.21383e-08	6.04275e-06
GO:0043161	proteasome-mediated ubiquitin-dependent protein catabolic process	4.2198e-08	6.04275e-06
GO:0015980	energy derivation by oxidation of organic compounds	4.31581e-08	6.12193e-06
GO:0034470	ncRNA processing	4.49146e-08	6.31155e-06
GO:0006810	transport	5.43276e-08	7.56361e-06
GO:0046034	ATP metabolic process	5.66972e-08	7.82109e-06
GO:0006457	protein folding	6.20316e-08	8.47916e-06
GO:0072594	establishment of protein localization to organelle	7.55103e-08	1.02286e-05
GO:0042254	ribosome biogenesis	7.70332e-08	1.03417e-05
GO:0090407	organophosphate biosynthetic process	9.66269e-08	1.28574e-05
GO:0009152	purine ribonucleotide biosynthetic process	1.04932e-07	1.384e-05
GO:0016567	protein ubiquitination	1.35234e-07	1.76816e-05
GO:0061024	membrane organization	1.40724e-07	1.82407e-05
GO:0046390	ribose phosphate biosynthetic process	1.58995e-07	2.04329e-05
GO:0010467	gene expression	1.67499e-07	2.13434e-05
GO:0006417	regulation of translation	1.98911e-07	2.5133e-05
GO:0048488	synaptic vesicle endocytosis	2.18485e-07	2.71499e-05
GO:0140238	presynaptic endocytosis	2.18485e-07	2.71499e-05
GO:0006399	tRNA metabolic process	2.29108e-07	2.82367e-05
GO:0000380	alternative mRNA splicing, via spliceosome	2.32966e-07	2.84786e-05
GO:0009260	ribonucleotide biosynthetic process	2.38732e-07	2.89481e-05
GO:0006164	purine nucleotide biosynthetic process	3.36696e-07	4.05005e-05
GO:0099504	synaptic vesicle cycle	4.03902e-07	4.8199e-05
GO:0050684	regulation of mRNA processing	4.1964e-07	4.96827e-05
GO:0048024	regulation of mRNA splicing, via spliceosome	4.31722e-07	5.07138e-05
GO:0031333	negative regulation of protein-containing complex assembly	4.81523e-07	5.61254e-05
GO:0009165	nucleotide biosynthetic process	5.52199e-07	6.38681e-05
GO:0048489	synaptic vesicle transport	5.9956e-07	6.88167e-05
GO:1901293	nucleoside phosphate biosynthetic process	6.68307e-07	7.61263e-05
GO:0035459	vesicle cargo loading	6.88671e-07	7.78561e-05
GO:0051640	organelle localization	7.38101e-07	8.28215e-05
GO:0072522	purine-containing compound biosynthetic process	9.33835e-07	0.000104008
GO:0098930	axonal transport	1.21982e-06	0.000134862
GO:0009142	nucleoside triphosphate biosynthetic process	1.73856e-06	0.000190811
GO:0072384	organelle transport along microtubule	1.81375e-06	0.000197619
GO:0016070	RNA metabolic process	2.17305e-06	0.000235065
GO:0042273	ribosomal large subunit biogenesis	2.4606e-06	0.000264268
GO:0097479	synaptic vesicle localization	3.2241e-06	0.000343813
GO:0051205	protein insertion into membrane	3.51973e-06	0.000372695
GO:2000112	regulation of cellular macromolecule biosynthetic process	3.61625e-06	0.000380237
GO:0002183	cytoplasmic translational initiation	3.65446e-06	0.000381587
GO:0006099	tricarboxylic acid cycle	3.73165e-06	0.00038696
GO:0009145	purine nucleoside triphosphate biosynthetic process	4.41145e-06	0.000454319
GO:0022607	cellular component assembly	4.49954e-06	0.000460239
GO:0031503	protein-containing complex localization	4.65924e-06	0.000473353
GO:0016050	vesicle organization	5.43964e-06	0.000548929
GO:0016197	endosomal transport	5.70548e-06	0.000571917
GO:0008089	anterograde axonal transport	6.38566e-06	0.00063586
GO:0009206	purine ribonucleoside triphosphate biosynthetic process	6.87437e-06	0.00068002
GO:0046939	nucleotide phosphorylation	7.88877e-06	0.000775265
GO:0006120	mitochondrial electron transport, NADH to ubiquinone	8.52797e-06	0.00083264
GO:0070201	regulation of establishment of protein localization	8.60749e-06	0.000834982
GO:0075522	IRES-dependent viral translational initiation	9.27626e-06	0.000894089
GO:0045727	positive regulation of translation	1.0516e-05	0.00100713
GO:1903311	regulation of mRNA metabolic process	1.17086e-05	0.00111424
GO:0006090	pyruvate metabolic process	1.58178e-05	0.00149583
GO:0016043	cellular component organization	1.61334e-05	0.00151613
GO:0009201	ribonucleoside triphosphate biosynthetic process	1.64934e-05	0.00154034
GO:0051129	negative regulation of cellular component organization	1.76921e-05	0.00164209
GO:0015986	proton motive force-driven ATP synthesis	1.93384e-05	0.00178388
GO:0006165	nucleoside diphosphate phosphorylation	1.96437e-05	0.00180099
GO:0048284	organelle fusion	2.20849e-05	0.00201253
GO:0043254	regulation of protein-containing complex assembly	2.22261e-05	0.0020132
GO:1903829	positive regulation of protein localization	2.37211e-05	0.00213575
GO:0071816	tail-anchored membrane protein insertion into ER membrane	2.51874e-05	0.00225427
GO:0042176	regulation of protein catabolic process	2.63533e-05	0.00234467
GO:0006446	regulation of translational initiation	2.93286e-05	0.00259403
GO:0007005	mitochondrion organization	3.03925e-05	0.00267241
GO:0045048	protein insertion into ER membrane	3.08841e-05	0.00269984
GO:0042255	ribosome assembly	3.1581e-05	0.00274481
GO:0060341	regulation of cellular localization	3.27555e-05	0.00283004
GO:0090304	nucleic acid metabolic process	3.2938e-05	0.00283004
GO:0007034	vacuolar transport	3.37925e-05	0.00288542
GO:0022411	cellular component disassembly	3.39664e-05	0.00288542
GO:0043412	macromolecule modification	3.4677e-05	0.00291528
GO:0006754	ATP biosynthetic process	3.47057e-05	0.00291528
GO:0009132	nucleoside diphosphate metabolic process	3.53443e-05	0.00295243
GO:0048193	Golgi vesicle transport	3.55685e-05	0.00295474
GO:0007029	endoplasmic reticulum organization	3.67701e-05	0.00303054
GO:0006900	vesicle budding from membrane	3.68841e-05	0.00303054
GO:0006364	rRNA processing	3.71231e-05	0.0030336
GO:0006508	proteolysis	3.88812e-05	0.0031601
GO:0033119	negative regulation of RNA splicing	3.96878e-05	0.00320831
GO:0010256	endomembrane system organization	4.21928e-05	0.00339257
GO:0019081	viral translation	4.35046e-05	0.00347944
GO:1903320	regulation of protein modification by small protein conjugation or removal	4.62003e-05	0.00367549
GO:0034250	positive regulation of cellular amide metabolic process	4.67133e-05	0.00369674
GO:0042776	proton motive force-driven mitochondrial ATP synthesis	4.72938e-05	0.00372309
GO:0007031	peroxisome organization	4.91409e-05	0.00384835
GO:0032386	regulation of intracellular transport	5.47138e-05	0.00426258
GO:0016072	rRNA metabolic process	5.70064e-05	0.00441829
GO:0032880	regulation of protein localization	5.7369e-05	0.00442359
GO:0008033	tRNA processing	5.79688e-05	0.00444704
GO:0010257	NADH dehydrogenase complex assembly	6.02557e-05	0.00457365
GO:0032981	mitochondrial respiratory chain complex I assembly	6.02557e-05	0.00457365
GO:0051223	regulation of protein transport	6.05318e-05	0.00457365
GO:0006119	oxidative phosphorylation	6.9067e-05	0.00519246
GO:0099072	regulation of postsynaptic membrane neurotransmitter receptor levels	7.33742e-05	0.00548883
GO:0009059	macromolecule biosynthetic process	7.43579e-05	0.00553488
GO:0047496	vesicle transport along microtubule	8.48841e-05	0.00628728
GO:1904951	positive regulation of establishment of protein localization	8.67373e-05	0.00639305
GO:0051128	regulation of cellular component organization	9.15408e-05	0.00671418
GO:0099536	synaptic signaling	9.58412e-05	0.00699548
GO:0071786	endoplasmic reticulum tubular network organization	9.68321e-05	0.00703366
GO:0033108	mitochondrial respiratory chain complex assembly	0.000101599	0.00734442
GO:0090313	regulation of protein targeting to membrane	0.00010844	0.00780145
GO:0061077	chaperone-mediated protein folding	0.000122849	0.00878238
GO:0051656	establishment of organelle localization	0.000123243	0.00878238
GO:0002098	tRNA wobble uridine modification	0.000124773	0.00884946
GO:0010608	post-transcriptional regulation of gene expression	0.000127567	0.00900515
GO:0000338	protein deneddylation	0.000130661	0.00917664
GO:0009451	RNA modification	0.000131217	0.00917664
GO:0031647	regulation of protein stability	0.000136154	0.00947782
GO:0033120	positive regulation of RNA splicing	0.0001391	0.00963831
GO:2000058	regulation of ubiquitin-dependent protein catabolic process	0.000143661	0.00990866
GO:0006888	endoplasmic reticulum to Golgi vesicle-mediated transport	0.000156361	0.0107353
GO:0001731	formation of translation preinitiation complex	0.000158371	0.0107851
GO:1901135	carbohydrate derivative metabolic process	0.00015852	0.0107851
GO:0051693	actin filament capping	0.000173297	0.0117374
GO:0099537	trans-synaptic signaling	0.000182072	0.0122764
GO:0007268	chemical synaptic transmission	0.000199639	0.0133412
GO:0098916	anterograde trans-synaptic signaling	0.000199639	0.0133412
GO:0043039	tRNA aminoacylation	0.000218262	0.0145212
GO:0046719	regulation by virus of viral protein levels in host cell	0.000221949	0.0147014
GO:1990778	protein localization to cell periphery	0.000224652	0.0148152
GO:1903008	organelle disassembly	0.000233036	0.015301
GO:0097120	receptor localization to synapse	0.000245878	0.0160279
GO:0033043	regulation of organelle organization	0.000246239	0.0160279
GO:0006612	protein targeting to membrane	0.000265143	0.017184
GO:0090314	positive regulation of protein targeting to membrane	0.0002677	0.0172752
GO:0000245	spliceosomal complex assembly	0.000270657	0.0173915
GO:0032272	negative regulation of protein polymerization	0.000271952	0.0174003
GO:0031344	regulation of cell projection organization	0.000278607	0.0177506
GO:0120035	regulation of plasma membrane bounded cell projection organization	0.000286075	0.0181495
GO:0006007	glucose catabolic process	0.000291368	0.0184076
GO:0031396	regulation of protein ubiquitination	0.000320038	0.0200736
GO:0099532	synaptic vesicle endosomal processing	0.000320903	0.0200736
GO:0006418	tRNA aminoacylation for protein translation	0.000321744	0.0200736
GO:0019752	carboxylic acid metabolic process	0.000327133	0.0203255
GO:0032388	positive regulation of intracellular transport	0.000331606	0.0205186
GO:0032984	protein-containing complex disassembly	0.000334134	0.0205903
GO:0065002	intracellular protein transmembrane transport	0.000352335	0.0216233
GO:0043038	amino acid activation	0.000355825	0.0217487
GO:0043436	oxoacid metabolic process	0.000361974	0.022035
GO:0006625	protein targeting to peroxisome	0.000392192	0.023588
GO:0072662	protein localization to peroxisome	0.000392192	0.023588
GO:0072663	establishment of protein localization to peroxisome	0.000392192	0.023588
GO:2000767	positive regulation of cytoplasmic translation	0.000394166	0.0236123
GO:0140053	mitochondrial gene expression	0.000418791	0.0249878
GO:0017156	calcium-ion regulated exocytosis	0.000428	0.0254364
GO:0090174	organelle membrane fusion	0.000434727	0.0257345
GO:0000381	regulation of alternative mRNA splicing, via spliceosome	0.000438735	0.0258699
GO:1901137	carbohydrate derivative biosynthetic process	0.000452007	0.0265483
GO:0099518	vesicle cytoskeletal trafficking	0.000455204	0.0266321
GO:0009894	regulation of catabolic process	0.000467072	0.0272205
GO:0042147	retrograde transport, endosome to Golgi	0.000481054	0.0279271
GO:0009135	purine nucleoside diphosphate metabolic process	0.000492402	0.0283669
GO:0009179	purine ribonucleoside diphosphate metabolic process	0.000492402	0.0283669
GO:0006906	vesicle fusion	0.000499876	0.0286875
GO:0046031	ADP metabolic process	0.000523345	0.029693
GO:0046185	aldehyde catabolic process	0.000525787	0.029693
GO:0048490	anterograde synaptic vesicle transport	0.000527269	0.029693
GO:0099514	synaptic vesicle cytoskeletal transport	0.000527269	0.029693
GO:0099517	synaptic vesicle transport along microtubule	0.000527269	0.029693
GO:0006082	organic acid metabolic process	0.000534543	0.0299903
GO:0061025	membrane fusion	0.000548257	0.0303143
GO:0006403	RNA localization	0.000549228	0.0303143
GO:0090110	COPII-coated vesicle cargo loading	0.000551899	0.0303143
GO:0033865	nucleoside bisphosphate metabolic process	0.000552415	0.0303143
GO:0033875	ribonucleoside bisphosphate metabolic process	0.000552415	0.0303143
GO:0034032	purine nucleoside bisphosphate metabolic process	0.000552415	0.0303143
GO:0050806	positive regulation of synaptic transmission	0.000569148	0.0311189
GO:0033157	regulation of intracellular protein transport	0.000581356	0.0316713
GO:0016482	cytosolic transport	0.000583519	0.0316743
GO:1900244	positive regulation of synaptic vesicle endocytosis	0.000585944	0.0316916
GO:0006637	acyl-CoA metabolic process	0.000627255	0.0336836
GO:0035383	thioester metabolic process	0.000627255	0.0336836
GO:0030835	negative regulation of actin filament depolymerization	0.000656847	0.0351471
GO:0006089	lactate metabolic process	0.000667422	0.035502
GO:0071806	protein transmembrane transport	0.000668201	0.035502
GO:0007033	vacuole organization	0.000681102	0.0360601
GO:0045050	protein insertion into ER membrane by stop-transfer membrane-anchor sequence	0.000703726	0.0371271
GO:0006103	2-oxoglutarate metabolic process	0.000709465	0.037299
GO:0044087	regulation of cellular component biogenesis	0.000716899	0.0375585
GO:0031623	receptor internalization	0.000729889	0.0381034
GO:0032434	regulation of proteasomal ubiquitin-dependent protein catabolic process	0.000732368	0.0381034
GO:0060627	regulation of vesicle-mediated transport	0.000741589	0.0384501
GO:1902992	negative regulation of amyloid precursor protein catabolic process	0.000771625	0.039707
GO:0099177	regulation of trans-synaptic signaling	0.000773085	0.039707
GO:0017158	regulation of calcium ion-dependent exocytosis	0.000773754	0.039707
GO:0032271	regulation of protein polymerization	0.000777441	0.0397606
GO:0034249	negative regulation of cellular amide metabolic process	0.000780101	0.0397614
GO:0032543	mitochondrial translation	0.000813913	0.0413446
GO:0006400	tRNA modification	0.000847825	0.0428935
GO:0051222	positive regulation of protein transport	0.000850111	0.0428935
GO:0043648	dicarboxylic acid metabolic process	0.000859141	0.0432042
GO:0009185	ribonucleoside diphosphate metabolic process	0.000905016	0.0453594
GO:0008064	regulation of actin polymerization or depolymerization	0.000911809	0.045548
GO:0061615	glycolytic process through fructose-6-phosphate	0.000916182	0.0456149
GO:0099550	trans-synaptic signaling, modulating synaptic transmission	0.000924714	0.0458878
GO:0050804	modulation of chemical synaptic transmission	0.000930704	0.0460331
GO:0070585	protein localization to mitochondrion	0.000954106	0.0470359
GO:0036211	protein modification process	0.000972586	0.0477902
GO:0030833	regulation of actin filament polymerization	0.00101393	0.0496593
GO:0044743	protein transmembrane import into intracellular organelle	0.00101955	0.0497727
GO:0030042	actin filament depolymerization	0.00102701	0.0499744
