# Supplementary material for: Full-length RNA transcript sequencing traces brain isoform diversity in house mouse natural populations
Source: HighWire-hosted journal article supplement (doi:10.1101/gr.279166.124), 2024-09-17
Supplement: Supplemental_Data_S6.xlsx [file Supplemental_Data_S6.xlsx]

## Sheet: Data S6
Supplemental Data S6 Ratio analysis for normalized isoform read counts (TPM) Only genes with at least two isoforms in M. musculus individuals are included; G = all expressed isoform, T = top expressed isoforms, R = all other isoforms
all Genes								Top 10%								Lowest 10%
Gene_ID	TPM_AVG_G	TPM_AVG_T	TPM_AVG_R	ratio R/T	AV_ratio_R/T	SD_ratio_R/T		Gene_ID	TPM_AVG_G	TPM_AVG_T	TPM_AVG_R	ratio R/T	AV_ratio_R/T	SD_ratio_R/T		Gene_ID	TPM_AVG_G	TPM_AVG_T	TPM_AVG_R	ratio R/T	AV_ratio_R/T	SD_ratio_R/T
G19937	8803.94	5267.3	3536.64	0.671434	1.03537	1.03587		G19937	8803.94	5267.3	3536.64	0.671434	0.43218	0.633332		G17390	5.69666	2.44692	3.24973	1.32809	1.11452	0.620494
G16618	8721.04	5389.28	3331.76	0.618219				G16618	8721.04	5389.28	3331.76	0.618219				G9105	5.69565	1.62127	4.07438	2.51308
G32387	5272.73	2293.54	2979.19	1.29895				G32387	5272.73	2293.54	2979.19	1.29895				G24013	5.69449	1.61157	4.08292	2.5335
G26198	4294.1	3883.58	410.522	0.105707				G26198	4294.1	3883.58	410.522	0.105707				G7980	5.69428	2.59973	3.09455	1.19033
G35760	3981.64	3942.39	39.2491	0.00995564				G35760	3981.64	3942.39	39.2491	0.00995564				G10774	5.69418	1.52882	4.16535	2.72455
G1926	3903.24	2976.07	927.175	0.311544				G1926	3903.24	2976.07	927.175	0.311544				G17492	5.69348	2.58848	3.105	1.19954
G29083	3890.6	3795.82	94.7797	0.0249695				G29083	3890.6	3795.82	94.7797	0.0249695				G4154	5.69317	3.51751	2.17567	0.618526
G14927	3882.57	3410.82	471.756	0.138312				G14927	3882.57	3410.82	471.756	0.138312				G4365	5.68839	2.60496	3.08344	1.18368
G6655	3694.48	3581.75	112.725	0.0314721				G6655	3694.48	3581.75	112.725	0.0314721				G24239	5.68761	1.60469	4.08292	2.54436
G35793	3539.15	3455.82	83.326	0.0241118				G35793	3539.15	3455.82	83.326	0.0241118				G31420	5.68406	4.60676	1.0773	0.233852
G5556	3480.21	3100.21	379.999	0.122572				G5556	3480.21	3100.21	379.999	0.122572				G17616	5.67797	3.21334	2.46463	0.766998
G3022	3319.76	2345.01	974.749	0.41567				G3022	3319.76	2345.01	974.749	0.41567				G13092	5.67668	3.58686	2.08982	0.582633
G32603	3214.12	2693.59	520.536	0.19325				G32603	3214.12	2693.59	520.536	0.19325				G8323	5.66153	4.58423	1.0773	0.235001
G25409	3199.32	3135.11	64.2172	0.0204833				G25409	3199.32	3135.11	64.2172	0.0204833				G9182	5.65912	2.23255	3.42657	1.53483
G8129	2978.91	2562.65	416.263	0.162435				G8129	2978.91	2562.65	416.263	0.162435				G35498	5.65738	1.58236	4.07501	2.57527
G16965	2933.83	2879.57	54.2614	0.0188436				G16965	2933.83	2879.57	54.2614	0.0188436				G8732	5.65686	1.54591	4.11094	2.65923
G16572	2808.09	1537.38	1270.71	0.826546				G16572	2808.09	1537.38	1270.71	0.826546				G8062	5.65448	1.56897	4.08551	2.60394
G15177	2803.37	2757.7	45.6646	0.016559				G15177	2803.37	2757.7	45.6646	0.016559				G24958	5.64883	2.35889	3.28994	1.3947
G8560	2772.9	2491.34	281.568	0.113019				G8560	2772.9	2491.34	281.568	0.113019				G33935	5.63678	1.55771	4.07907	2.61863
G34923	2730.14	2451.87	278.269	0.113493				G34923	2730.14	2451.87	278.269	0.113493				G34700	5.63454	3.5467	2.08783	0.588669
G3071	2723.68	2645.29	78.3946	0.0296356				G3071	2723.68	2645.29	78.3946	0.0296356				G34616	5.63252	3.37798	2.25453	0.667419
G4172	2686.19	2366.95	319.24	0.134874				G4172	2686.19	2366.95	319.24	0.134874				G36008	5.63245	4.04503	1.58741	0.392435
G20696	2642.18	2609.75	32.4264	0.0124251				G20696	2642.18	2609.75	32.4264	0.0124251				G26074	5.6272	2.38178	3.24542	1.3626
G15565	2525.63	2478.53	47.0962	0.0190016				G15565	2525.63	2478.53	47.0962	0.0190016				G21887	5.62706	2.46467	3.16239	1.28309
G7922	2451.87	1242.3	1209.56	0.973644				G7922	2451.87	1242.3	1209.56	0.973644				G29324	5.62318	3.27247	2.35071	0.718328
G25493	2440.3	2318.36	121.937	0.0525961				G25493	2440.3	2318.36	121.937	0.0525961				G25487	5.62255	2.54512	3.07743	1.20915
G30335	2410.23	1843.77	566.462	0.307231				G30335	2410.23	1843.77	566.462	0.307231				G10259	5.62214	2.24876	3.37338	1.50011
G10683	2392.37	1348.53	1043.84	0.774059				G10683	2392.37	1348.53	1043.84	0.774059				G29832	5.62139	2.38569	3.2357	1.3563
G10571	2362.71	2137.96	224.745	0.105121				G10571	2362.71	2137.96	224.745	0.105121				G1702	5.61838	1.45986	4.15852	2.84858
G36172	2352.88	1276.29	1076.59	0.843528				G36172	2352.88	1276.29	1076.59	0.843528				G26416	5.61681	4.53389	1.08292	0.23885
G16906	2338.08	1725.11	612.98	0.355329				G16906	2338.08	1725.11	612.98	0.355329				G29499	5.61524	2.34826	3.26699	1.39124
G19865	2306.38	2231.77	74.6135	0.0334325				G19865	2306.38	2231.77	74.6135	0.0334325				G16909	5.61403	2.53092	3.08311	1.21818
G8830	2270.11	2021.82	248.289	0.122804				G8830	2270.11	2021.82	248.289	0.122804				G15762	5.60783	1.48345	4.12438	2.78026
G27664	2243.81	1980.75	263.063	0.13281				G27664	2243.81	1980.75	263.063	0.13281				G12416	5.60632	2.459	3.14732	1.27992
G16894	2229.81	1705.46	524.352	0.307455				G16894	2229.81	1705.46	524.352	0.307455				G29359	5.6053	3.53029	2.07501	0.587775
G14808	2204.99	2097.34	107.649	0.0513267				G14808	2204.99	2097.34	107.649	0.0513267				G1533	5.60303	2.30943	3.2936	1.42615
G18955	2128.6	1366.06	762.541	0.558205				G18955	2128.6	1366.06	762.541	0.558205				G13431	5.60259	2.51205	3.09053	1.23028
G6824	2106.03	1418.29	687.738	0.484907				G6824	2106.03	1418.29	687.738	0.484907				G12960	5.59675	3.35924	2.23751	0.666075
G7440	2094.79	1862.88	231.903	0.124486				G7440	2094.79	1862.88	231.903	0.124486				G2184	5.5966	4.2835	1.3131	0.30655
G6343	2090.51	953.7	1136.81	1.192				G6343	2090.51	953.7	1136.81	1.192				G971	5.59631	1.42128	4.17503	2.93752
G29737	2083.2	1673.15	410.047	0.245075				G29737	2083.2	1673.15	410.047	0.245075				G5318	5.59187	3.37065	2.22122	0.65899
G26482	2078.7	2060.8	17.9027	0.00868729				G26482	2078.7	2060.8	17.9027	0.00868729				G25875	5.59122	2.35094	3.24028	1.37829
G20089	2067.95	2044.99	22.9588	0.0112268				G20089	2067.95	2044.99	22.9588	0.0112268				G26220	5.59012	2.50669	3.08344	1.23008
G3255	2052.5	1926.35	126.145	0.0654837				G3255	2052.5	1926.35	126.145	0.0654837				G12821	5.5854	2.41832	3.16708	1.30962
G10713	1983.43	1785.95	197.48	0.110574				G10713	1983.43	1785.95	197.48	0.110574				G32683	5.58054	4.41211	1.16843	0.264823
G20746	1967	1758.09	208.914	0.118831				G20746	1967	1758.09	208.914	0.118831				G28282	5.57404	1.49738	4.07666	2.72252
G11471	1957.85	961.198	996.654	1.03689				G11471	1957.85	961.198	996.654	1.03689				G13510	5.57331	3.48349	2.08982	0.599922
G27097	1940.92	1713.54	227.379	0.132695				G27097	1940.92	1713.54	227.379	0.132695				G35235	5.57092	3.40135	2.16956	0.637852
G28920	1872.65	1812.96	59.6863	0.032922				G28920	1872.65	1812.96	59.6863	0.032922				G32463	5.56937	2.42349	3.14588	1.29808
G4808	1870.22	1755.45	114.77	0.0653791				G4808	1870.22	1755.45	114.77	0.0653791				G25441	5.56382	3.20314	2.36068	0.736987
G5140	1864.58	1833.79	30.7905	0.0167906				G5140	1864.58	1833.79	30.7905	0.0167906				G36906	5.56013	2.47557	3.08456	1.246
G4607	1848.67	1780.19	68.479	0.0384673				G4607	1848.67	1780.19	68.479	0.0384673				G5183	5.55881	3.25665	2.30216	0.706909
G17448	1841.32	1772.24	69.0764	0.0389769				G17448	1841.32	1772.24	69.0764	0.0389769				G15407	5.55613	2.31134	3.24479	1.40386
G29604	1826.62	1733.45	93.1674	0.0537468				G29604	1826.62	1733.45	93.1674	0.0537468				G26433	5.55215	3.32795	2.2242	0.66834
G19466	1825.8	1376.33	449.468	0.326571				G19466	1825.8	1376.33	449.468	0.326571				G13774	5.54986	2.26169	3.28817	1.45385
G10724	1822.89	1764.93	57.9596	0.0328396				G10724	1822.89	1764.93	57.9596	0.0328396				G19884	5.54955	3.05767	2.49189	0.814964
G4459	1816.74	1667.17	149.572	0.0897163				G4459	1816.74	1667.17	149.572	0.0897163				G2006	5.54935	3.30846	2.2409	0.677325
G5347	1807.29	1783.92	23.3697	0.0131002				G5347	1807.29	1783.92	23.3697	0.0131002				G9090	5.54345	3.27697	2.26648	0.69164
G17419	1746.15	1683.36	62.7929	0.0373022				G17419	1746.15	1683.36	62.7929	0.0373022				G10902	5.54207	1.46464	4.07743	2.78391
G6926	1715.45	864.7	850.749	0.983866				G6926	1715.45	864.7	850.749	0.983866				G34443	5.53893	3.98495	1.55399	0.389964
G31754	1705.82	1700.7	5.1235	0.00301259				G31754	1705.82	1700.7	5.1235	0.00301259				G33276	5.53753	4.0463	1.49123	0.368542
G32236	1681.18	799.566	881.614	1.10262				G32236	1681.18	799.566	881.614	1.10262				G29682	5.53688	2.11397	3.42291	1.61919
G34620	1644.7	1630.92	13.7807	0.00844966				G34620	1644.7	1630.92	13.7807	0.00844966				G23911	5.53603	3.24501	2.29101	0.706011
G20305	1637.84	842.392	795.448	0.944273				G20305	1637.84	842.392	795.448	0.944273				G25034	5.5314	2.28329	3.24811	1.42256
G20122	1629.09	1437.26	191.83	0.133469				G20122	1629.09	1437.26	191.83	0.133469				G20824	5.53099	1.44696	4.08403	2.82249
G32296	1620.33	1382.58	237.751	0.171961				G32296	1620.33	1382.58	237.751	0.171961				G32629	5.52735	2.25564	3.2717	1.45045
G29201	1618.09	1489.41	128.683	0.0863988				G29201	1618.09	1489.41	128.683	0.0863988				G25420	5.52712	3.36671	2.16041	0.641697
G8070	1613.82	378.626	1235.19	3.2623				G8070	1613.82	378.626	1235.19	3.2623				G6831	5.52665	1.45124	4.07541	2.80823
G24504	1611.91	735.389	876.518	1.19191				G24504	1611.91	735.389	876.518	1.19191				G29386	5.52175	4.19377	1.32798	0.316656
G36422	1580.56	1512.96	67.6013	0.0446814				G36422	1580.56	1512.96	67.6013	0.0446814				G18897	5.51716	1.4432	4.07396	2.82287
G15792	1525.79	1355.19	170.599	0.125886				G15792	1525.79	1355.19	170.599	0.125886				G18399	5.513	1.42318	4.08982	2.87371
G26767	1523.95	1514.82	9.13666	0.00603152				G26767	1523.95	1514.82	9.13666	0.00603152				G24134	5.50808	4.15548	1.35259	0.325496
G22973	1520.67	948.303	572.372	0.603575				G22973	1520.67	948.303	572.372	0.603575				G19153	5.50784	1.34981	4.15803	3.08047
G35553	1519.16	1466.35	52.8073	0.0360128				G35553	1519.16	1466.35	52.8073	0.0360128				G6995	5.50705	1.42361	4.08344	2.86836
G18098	1502.62	1434.56	68.0666	0.0474478				G18098	1502.62	1434.56	68.0666	0.0474478				G34077	5.50582	1.4229	4.08292	2.86945
G4855	1469.15	768.558	700.589	0.911563				G4855	1469.15	768.558	700.589	0.911563				G33908	5.49752	1.42356	4.07396	2.86181
G21992	1460.11	1286.42	173.697	0.135024				G21992	1460.11	1286.42	173.697	0.135024				G11856	5.49746	4.42452	1.07294	0.242499
G32873	1450.77	1150.19	300.577	0.261327				G32873	1450.77	1150.19	300.577	0.261327				G30950	5.4941	3.18099	2.31312	0.727169
G35923	1439.21	1408.9	30.3129	0.0215154				G35923	1439.21	1408.9	30.3129	0.0215154				G34813	5.49309	2.17775	3.31534	1.52237
G12184	1426.97	1163.85	263.116	0.226073				G12184	1426.97	1163.85	263.116	0.226073				G14334	5.49181	2.39726	3.09455	1.29087
G26268	1420.97	1375.39	45.576	0.0331368				G26268	1420.97	1375.39	45.576	0.0331368				G2544	5.48576	1.39594	4.08982	2.92979
G33946	1412.13	1204.32	207.817	0.17256				G33946	1412.13	1204.32	207.817	0.17256				G20029	5.48561	2.4062	3.0794	1.27978
G34891	1410.29	732.906	677.388	0.92425				G34891	1410.29	732.906	677.388	0.92425				G31014	5.48363	4.32677	1.15686	0.267372
G34488	1402.48	1365.81	36.6686	0.0268476				G34488	1402.48	1365.81	36.6686	0.0268476				G23164	5.48216	2.35124	3.13092	1.3316
G23574	1383.56	1169.96	213.606	0.182576				G23574	1383.56	1169.96	213.606	0.182576				G10422	5.47829	2.39426	3.08403	1.2881
G28990	1359.72	1264.12	95.5996	0.0756255				G28990	1359.72	1264.12	95.5996	0.0756255				G25481	5.47781	2.3587	3.1191	1.32238
G20816	1358.95	994.874	364.073	0.365949				G20816	1358.95	994.874	364.073	0.365949				G1899	5.47775	3.27594	2.20181	0.672115
G16938	1343.34	1274.51	68.8285	0.0540039				G16938	1343.34	1274.51	68.8285	0.0540039				G30113	5.47635	1.39292	4.08343	2.93156
G24245	1336.08	1184.36	151.719	0.128101				G24245	1336.08	1184.36	151.719	0.128101				G26481	5.475	2.31137	3.16363	1.36873
G26751	1319.48	801.111	518.366	0.647059				G26751	1319.48	801.111	518.366	0.647059				G33071	5.46894	3.23954	2.2294	0.688184
G28433	1305.93	1089.08	216.85	0.199113				G28433	1305.93	1089.08	216.85	0.199113				G21866	5.46508	1.34766	4.11741	3.05522
G27896	1303.58	1254.6	48.9821	0.039042				G27896	1303.58	1254.6	48.9821	0.039042				G33356	5.46432	4.3745	1.08982	0.24913
G18962	1301.48	1220.09	81.3861	0.066705				G18962	1301.48	1220.09	81.3861	0.066705				G11867	5.46182	4.30727	1.15455	0.268046
G8585	1296.14	1267.2	28.9352	0.0228339				G8585	1296.14	1267.2	28.9352	0.0228339				G7991	5.45807	4.37404	1.08403	0.247833
G4910	1284.69	1260.31	24.3891	0.0193517				G4910	1284.69	1260.31	24.3891	0.0193517				G6386	5.45654	1.3694	4.08714	2.98463
G32155	1283.41	1252.04	31.3625	0.0250491				G32155	1283.41	1252.04	31.3625	0.0250491				G14215	5.45442	2.337	3.11741	1.33393
G9906	1276.7	877.851	398.845	0.454342				G9906	1276.7	877.851	398.845	0.454342				G14922	5.45073	2.28987	3.16086	1.38037
G5268	1266.45	899.781	366.666	0.407506				G5268	1266.45	899.781	366.666	0.407506				G16346	5.44793	3.36389	2.08403	0.61953
G6523	1243.44	566.395	677.045	1.19536				G6523	1243.44	566.395	677.045	1.19536				G34476	5.44769	2.36829	3.0794	1.30027
G8918	1234.12	268.895	965.222	3.58958				G8918	1234.12	268.895	965.222	3.58958				G5733	5.44181	3.19979	2.24203	0.70068
G6015	1225.47	1196.32	29.1481	0.0243648				G6015	1225.47	1196.32	29.1481	0.0243648				G1154	5.44163	4.36144	1.0802	0.247669
G6098	1223.69	681.495	542.196	0.795598				G6098	1223.69	681.495	542.196	0.795598				G31474	5.43675	3.04072	2.39602	0.787977
G26763	1214.72	1075.45	139.27	0.1295				G26763	1214.72	1075.45	139.27	0.1295				G24046	5.43217	3.99342	1.43875	0.360281
G36149	1185.86	784.417	401.442	0.511772				G36149	1185.86	784.417	401.442	0.511772				G24034	5.4282	2.0377	3.3905	1.66389
G8096	1184.87	638.109	546.758	0.85684				G8096	1184.87	638.109	546.758	0.85684				G8936	5.42015	2.26332	3.15683	1.39478
G28753	1183.3	1119.22	64.0814	0.0572555				G28753	1183.3	1119.22	64.0814	0.0572555				G15386	5.41968	3.15995	2.25973	0.715114
G8994	1181	1124.62	56.3826	0.0501349				G8994	1181	1124.62	56.3826	0.0501349				G3672	5.41914	3.2026	2.21654	0.692107
G30958	1176.39	853.084	323.304	0.378982				G30958	1176.39	853.084	323.304	0.378982				G28985	5.41451	2.16828	3.24624	1.49715
G31018	1169.33	1163.65	5.67946	0.00488074				G31018	1169.33	1163.65	5.67946	0.00488074				G31241	5.41235	3.08668	2.32567	0.753454
G20287	1164.05	851.093	312.959	0.367715				G20287	1164.05	851.093	312.959	0.367715				G20483	5.40473	2.21868	3.18605	1.43601
G22754	1163.22	754.129	409.095	0.542474				G22754	1163.22	754.129	409.095	0.542474				G32719	5.39531	3.27501	2.12029	0.647415
G16088	1162.03	1054.83	107.2	0.101628				G16088	1162.03	1054.83	107.2	0.101628				G1040	5.39434	2.31414	3.0802	1.33103
G6517	1148.79	648.675	500.115	0.770979				G6517	1148.79	648.675	500.115	0.770979				G22435	5.3943	2.00035	3.39395	1.69668
G4972	1145.85	1077.42	68.4305	0.0635132				G4972	1145.85	1077.42	68.4305	0.0635132				G17452	5.39096	2.31366	3.0773	1.33006
G27073	1138.29	1045.49	92.7964	0.0887588				G27073	1138.29	1045.49	92.7964	0.0887588				G14258	5.39063	1.23438	4.15625	3.36708
G20541	1135.05	540.778	594.269	1.09891				G20541	1135.05	540.778	594.269	1.09891				G24054	5.38978	1.30686	4.08292	3.12421
G3402	1128.47	1030.43	98.0376	0.0951423				G3402	1128.47	1030.43	98.0376	0.0951423				G9301	5.38384	2.06256	3.32128	1.61027
G10287	1120.58	515.805	604.772	1.17248				G10287	1120.58	515.805	604.772	1.17248				G34355	5.37692	2.13675	3.24017	1.5164
G14785	1119.87	1041.87	78.0036	0.0748691				G14785	1119.87	1041.87	78.0036	0.0748691				G24410	5.37652	4.30436	1.07216	0.249087
G28037	1112.71	912.811	199.896	0.21899				G28037	1112.71	912.811	199.896	0.21899				G36414	5.37093	2.20381	3.16712	1.43711
G31639	1110.11	885.09	225.017	0.254231				G31639	1110.11	885.09	225.017	0.254231				G2261	5.36985	2.21504	3.15481	1.42426
G24821	1098.81	1067.38	31.4251	0.0294414				G24821	1098.81	1067.38	31.4251	0.0294414				G12729	5.36384	3.28073	2.08311	0.634953
G20019	1097.41	1077.05	20.3686	0.0189116				G20019	1097.41	1077.05	20.3686	0.0189116				G18118	5.36266	2.98405	2.37861	0.797108
G31206	1096.69	1067.15	29.5389	0.02768				G31206	1096.69	1067.15	29.5389	0.02768				G26769	5.36069	2.20561	3.15508	1.43048
G750	1091.52	993.61	97.9052	0.0985349				G750	1091.52	993.61	97.9052	0.0985349				G22713	5.35965	3.27673	2.08292	0.63567
G11157	1086.81	1018.53	68.2821	0.0670399				G11157	1086.81	1018.53	68.2821	0.0670399				G24101	5.35736	2.14638	3.21098	1.496
G3432	1083.09	1048.82	34.2674	0.0326723				G3432	1083.09	1048.82	34.2674	0.0326723				G653	5.35565	2.20938	3.14627	1.42405
G34815	1078.82	1052.67	26.1441	0.0248359				G34815	1078.82	1052.67	26.1441	0.0248359				G3754	5.35239	2.26014	3.09225	1.36817
G12602	1074.1	623.094	451.002	0.72381				G12602	1074.1	623.094	451.002	0.72381				G14521	5.34666	4.10749	1.23917	0.301686
G36339	1072.51	948.575	123.931	0.130649				G36339	1072.51	948.575	123.931	0.130649				G25470	5.34568	3.25785	2.08783	0.640863
G20229	1072.48	1004.57	67.9093	0.0676006				G20229	1072.48	1004.57	67.9093	0.0676006				G17520	5.33123	2.12283	3.20839	1.51137
G31673	1065.22	1031.77	33.4467	0.0324168				G31673	1065.22	1031.77	33.4467	0.0324168				G495	5.31568	2.23276	3.08292	1.38077
G31237	1063.52	489.038	574.481	1.17472				G31237	1063.52	489.038	574.481	1.17472				G9367	5.30575	2.23034	3.07541	1.3789
G14262	1061.43	1014.7	46.7362	0.0460592				G14262	1061.43	1014.7	46.7362	0.0460592				G27390	5.29868	2.18556	3.11311	1.4244
G1600	1060.67	1025.94	34.724	0.033846				G1600	1060.67	1025.94	34.724	0.033846				G29806	5.29833	3.00262	2.29571	0.764567
G15344	1055.46	508.415	547.047	1.07598				G15344	1055.46	508.415	547.047	1.07598				G2697	5.29796	2.05375	3.2442	1.57964
G24037	1052.71	657.027	395.68	0.602228				G24037	1052.71	657.027	395.68	0.602228				G5954	5.29037	2.13377	3.1566	1.47935
G26898	1049.83	1019.01	30.8184	0.0302435				G26898	1049.83	1019.01	30.8184	0.0302435				G17749	5.28848	3.21347	2.07501	0.645725
G29529	1036.04	881.72	154.322	0.175024				G29529	1036.04	881.72	154.322	0.175024				G33050	5.28741	2.19957	3.08783	1.40383
G35452	1034.21	511.599	522.609	1.02152				G35452	1034.21	511.599	522.609	1.02152				G19312	5.27607	4.18625	1.08982	0.260333
G19628	1022.21	980.404	41.8106	0.0426463				G19628	1022.21	980.404	41.8106	0.0426463				G13976	5.27165	2.10276	3.16889	1.50701
G34217	1020.36	979.186	41.1758	0.0420511				G34217	1020.36	979.186	41.1758	0.0420511				G5044	5.27021	3.01765	2.25257	0.746465
G18190	1017.46	515.223	502.236	0.974794				G18190	1017.46	515.223	502.236	0.974794				G1489	5.2688	3.10794	2.16086	0.695271
G9875	1014.93	438.178	576.75	1.31625				G9875	1014.93	438.178	576.75	1.31625				G9333	5.26338	2.18318	3.0802	1.41087
G31836	1013.94	954.458	59.4814	0.0623195				G31836	1013.94	954.458	59.4814	0.0623195				G31427	5.26329	4.09616	1.16712	0.28493
G10515	1012.87	876.292	136.581	0.155862				G10515	1012.87	876.292	136.581	0.155862				G1725	5.2486	2.17566	3.07294	1.41242
G35578	1010.72	860.705	150.012	0.17429				G35578	1010.72	860.705	150.012	0.17429				G9389	5.24804	2.06199	3.18605	1.54513
G4430	1004.37	714.395	289.976	0.405905				G4430	1004.37	714.395	289.976	0.405905				G14837	5.24625	2.10196	3.14428	1.49588
G36493	1000.29	978.968	21.3244	0.0217826				G36493	1000.29	978.968	21.3244	0.0217826				G26854	5.24618	2.09059	3.15559	1.50943
G3937	999.578	261.213	738.365	2.82667				G3937	999.578	261.213	738.365	2.82667				G14281	5.24487	2.96767	2.2772	0.767338
G974	987.24	931.538	55.7016	0.0597952				G974	987.24	931.538	55.7016	0.0597952				G24230	5.24461	2.05967	3.18494	1.54633
G4844	984.32	683.051	301.269	0.441064				G4844	984.32	683.051	301.269	0.441064				G4946	5.2432	2.16578	3.07743	1.42094
G17877	979.732	896.477	83.2553	0.0928694				G17877	979.732	896.477	83.2553	0.0928694				G36686	5.24086	2.16792	3.07294	1.41746
G1007	975.66	450.296	525.364	1.16671				G1007	975.66	450.296	525.364	1.16671				G2727	5.23642	2.89398	2.34245	0.80942
G31063	966.445	927.194	39.252	0.0423342				G31063	966.445	927.194	39.252	0.0423342				G24614	5.23369	1.93469	3.299	1.70518
G33079	964.655	941.102	23.5529	0.0250269				G33079	964.655	941.102	23.5529	0.0250269				G23638	5.22892	4.15162	1.0773	0.259489
G22655	964.616	925.658	38.9587	0.0420876				G22655	964.616	925.658	38.9587	0.0420876				G17302	5.22029	2.91779	2.30251	0.789128
G28358	964.346	902.927	61.4195	0.0680227				G28358	964.346	902.927	61.4195	0.0680227				G8572	5.21883	2.99704	2.2218	0.741331
G34659	958.531	863.356	95.175	0.110238				G34659	958.531	863.356	95.175	0.110238				G3406	5.21878	3.05214	2.16664	0.709876
G12054	948.685	931.445	17.2398	0.0185087				G12054	948.685	931.445	17.2398	0.0185087				G23742	5.21167	2.63579	2.57588	0.977271
G35788	946.653	927.766	18.8865	0.020357				G35788	946.653	927.766	18.8865	0.020357				G16682	5.21002	4.1202	1.08982	0.264506
G21247	943.606	885.546	58.0597	0.0655638				G21247	943.606	885.546	58.0597	0.0655638				G27847	5.20882	2.11689	3.09192	1.46059
G32798	939.998	508.428	431.57	0.848832				G32798	939.998	508.428	431.57	0.848832				G15642	5.20839	2.97424	2.23415	0.751168
G2671	934.416	821.449	112.967	0.137522				G2671	934.416	821.449	112.967	0.137522				G8881	5.20622	2.04635	3.15988	1.54416
G36609	933.251	422.913	510.337	1.20672				G36609	933.251	422.913	510.337	1.20672				G5580	5.20604	1.9451	3.26094	1.67649
G13493	924.956	895.493	29.4631	0.0329015				G13493	924.956	895.493	29.4631	0.0329015				G25300	5.20539	2.03111	3.17428	1.56283
G3373	923.343	853.328	70.0151	0.0820495				G3373	923.343	853.328	70.0151	0.0820495				G22196	5.20478	3.04076	2.16402	0.71167
G6407	923.216	345.894	577.322	1.66908				G6407	923.216	345.894	577.322	1.66908				G11545	5.1891	2.90685	2.28225	0.785126
G26246	917.478	764.615	152.864	0.199922				G26246	917.478	764.615	152.864	0.199922				G22872	5.18725	2.70066	2.48659	0.920735
G3439	912.544	874.691	37.8526	0.0432754				G3439	912.544	874.691	37.8526	0.0432754				G22776	5.18552	1.98641	3.19911	1.6105
G13443	911.195	824.896	86.2992	0.104618				G13443	911.195	824.896	86.2992	0.104618				G1630	5.1849	2.92854	2.25636	0.770475
G11885	906.879	786.778	120.101	0.15265				G11885	906.879	786.778	120.101	0.15265				G21526	5.17434	2.08978	3.08456	1.47602
G20994	906.535	860.212	46.3229	0.0538505				G20994	906.535	860.212	46.3229	0.0538505				G29866	5.17257	2.89135	2.28121	0.788977
G33439	905.93	866.636	39.2946	0.0453415				G33439	905.93	866.636	39.2946	0.0453415				G22394	5.16954	3.0056	2.16394	0.719969
G5882	902.788	329.346	573.443	1.74116				G5882	902.788	329.346	573.443	1.74116				G22802	5.16451	2.079	3.08551	1.48413
G21533	900.931	879.827	21.1034	0.0239858				G21533	900.931	879.827	21.1034	0.0239858				G36087	5.16359	1.69886	3.46473	2.03945
G26552	899.136	873.791	25.3454	0.0290062				G26552	899.136	873.791	25.3454	0.0290062				G23104	5.16354	3.08624	2.0773	0.673084
G35804	893.999	768.711	125.288	0.162985				G35804	893.999	768.711	125.288	0.162985				G27501	5.16265	1.9207	3.24195	1.6879
G30177	892.659	850.948	41.7113	0.0490174				G30177	892.659	850.948	41.7113	0.0490174				G3609	5.15778	2.0705	3.08728	1.49108
G33019	891.897	788.675	103.222	0.13088				G33019	891.897	788.675	103.222	0.13088				G23864	5.15751	2.07731	3.0802	1.48278
G4167	880.695	826.559	54.1363	0.065496				G4167	880.695	826.559	54.1363	0.065496				G19861	5.14362	2.91581	2.22781	0.764048
G164	869.379	820.74	48.639	0.0592623				G164	869.379	820.74	48.639	0.0592623				G24656	5.14339	2.79809	2.3453	0.838181
G3696	869.343	697.757	171.587	0.245912				G3696	869.343	697.757	171.587	0.245912				G21663	5.14256	2.64083	2.50173	0.947325
G28999	864.044	702.609	161.435	0.229765				G28999	864.044	702.609	161.435	0.229765				G34550	5.1419	2.04735	3.09455	1.51149
G3994	862.649	819.572	43.0774	0.0525608				G3994	862.649	819.572	43.0774	0.0525608				G14726	5.13983	3.98605	1.15378	0.289455
G33430	862.258	834.517	27.7404	0.0332412				G33430	862.258	834.517	27.7404	0.0332412				G24851	5.13472	1.97273	3.16199	1.60285
G5028	862.095	747.743	114.352	0.15293				G5028	862.095	747.743	114.352	0.15293				G9360	5.13024	2.03832	3.09192	1.5169
G5325	861.783	558.286	303.497	0.543623				G5325	861.783	558.286	303.497	0.543623				G29663	5.11718	3.68048	1.4367	0.390357
G21770	859.815	846.537	13.2784	0.0156855				G21770	859.815	846.537	13.2784	0.0156855				G6489	5.11153	4.02696	1.08456	0.269326
G35052	859.746	655.017	204.729	0.312556				G35052	859.746	655.017	204.729	0.312556				G26540	5.10581	1.95497	3.15084	1.61171
G21377	859.041	783.301	75.7406	0.0966941				G21377	859.041	783.301	75.7406	0.0966941				G7178	5.10537	2.01312	3.09225	1.53605
G28986	855.588	427.021	428.567	1.00362				G28986	855.588	427.021	428.567	1.00362				G24801	5.10314	3.00859	2.09455	0.696189
G21752	854.312	789.6	64.7119	0.0819552				G21752	854.312	789.6	64.7119	0.0819552				G9018	5.1012	1.80832	3.29288	1.82096
G3450	843.111	797.881	45.2297	0.0566873				G3450	843.111	797.881	45.2297	0.0566873				G22759	5.08546	2.00203	3.08343	1.54015
G36028	842.355	803.993	38.3624	0.0477149				G36028	842.355	803.993	38.3624	0.0477149				G24996	5.07595	2.67557	2.40038	0.897147
G10584	831.478	593.935	237.543	0.399947				G10584	831.478	593.935	237.543	0.399947				G21323	5.07265	1.80266	3.26998	1.81397
G22980	824.633	739.068	85.5657	0.115775				G22980	824.633	739.068	85.5657	0.115775				G13571	5.06867	1.9134	3.15527	1.64904
G13878	819.771	785.693	34.0781	0.0433733				G13878	819.771	785.693	34.0781	0.0433733				G35192	5.06789	1.97807	3.08982	1.56204
G36595	809.708	494.994	314.715	0.635795				G36595	809.708	494.994	314.715	0.635795				G28805	5.06421	1.98514	3.07907	1.55106
G1585	805.007	797.138	7.86907	0.00987165				G1585	805.007	797.138	7.86907	0.00987165				G3879	5.06318	2.81777	2.24542	0.796879
G30956	803.13	636.96	166.169	0.260879				G30956	803.13	636.96	166.169	0.260879				G30017	5.06119	3.24252	1.81866	0.560879
G1881	802.308	646.893	155.415	0.240248				G1881	802.308	646.893	155.415	0.240248				G17685	5.05533	3.90289	1.15244	0.29528
G4615	801.506	798.129	3.37775	0.00423209				G4615	801.506	798.129	3.37775	0.00423209				G19336	5.04565	3.70316	1.34249	0.362525
G13978	796.33	780.304	16.0252	0.0205371				G13978	796.33	780.304	16.0252	0.0205371				G28291	5.04373	1.96081	3.08292	1.57227
G18126	796.274	566.959	229.314	0.404464				G18126	796.274	566.959	229.314	0.404464				G32610	5.04353	3.72561	1.31792	0.353747
G20654	796.099	758.048	38.0509	0.0501959				G20654	796.099	758.048	38.0509	0.0501959				G24405	5.03735	2.9325	2.10485	0.717768
G14176	795.699	652.547	143.152	0.219374				G14176	795.699	652.547	143.152	0.219374				G16948	5.03634	1.87781	3.15852	1.68202
G34872	794.86	343.263	451.597	1.3156				G34872	794.86	343.263	451.597	1.3156				G1454	5.03503	1.96209	3.07294	1.56616
G32523	794.677	760.85	33.8271	0.0444597				G32523	794.677	760.85	33.8271	0.0444597				G26214	5.02949	2.89476	2.13473	0.737447
G29361	789.055	594.431	194.624	0.327411				G29361	789.055	594.431	194.624	0.327411				G17229	5.02915	2.8707	2.15844	0.751888
G36871	788.147	215.648	572.499	2.65478				G36871	788.147	215.648	572.499	2.65478				G6154	5.02866	2.94315	2.08551	0.708597
G3419	786.492	670.185	116.307	0.173544				G3419	786.492	670.185	116.307	0.173544				G33884	5.02444	2.86107	2.16337	0.756141
G12156	786.196	733.749	52.4468	0.0714778				G12156	786.196	733.749	52.4468	0.0714778				G5808	5.02085	1.94178	3.07907	1.58569
G6253	784.493	606.798	177.695	0.29284				G6253	784.493	606.798	177.695	0.29284				G7663	5.01306	2.41298	2.60008	1.07754
G6814	779.079	740.139	38.9399	0.0526115				G6814	779.079	740.139	38.9399	0.0526115				G7731	5.01252	1.82658	3.18595	1.74422
G13917	775.206	730.906	44.2993	0.0606088				G13917	775.206	730.906	44.2993	0.0606088				G21092	5.01096	3.93595	1.07501	0.273127
G4937	773.931	431.068	342.863	0.795381				G4937	773.931	431.068	342.863	0.795381				G14507	5.00961	1.46437	3.54525	2.42101
G26417	773.656	539.946	233.709	0.432838				G26417	773.656	539.946	233.709	0.432838				G6951	5.00844	1.91862	3.08982	1.61044
G25767	769.657	723.011	46.6465	0.064517				G25767	769.657	723.011	46.6465	0.064517				G14865	5.00794	2.93398	2.07396	0.706876
G35752	768.217	740.561	27.6557	0.0373442				G35752	768.217	740.561	27.6557	0.0373442				G13407	5.00371	2.65763	2.34608	0.882769
G7372	762.971	757.256	5.71452	0.00754636				G7372	762.971	757.256	5.71452	0.00754636				G26929	4.99539	1.82869	3.1667	1.73167
G29783	760.607	738.238	22.3682	0.0302994				G29783	760.607	738.238	22.3682	0.0302994				G10656	4.99284	1.91542	3.07743	1.60666
G3318	754.541	745.412	9.12886	0.0122467				G3318	754.541	745.412	9.12886	0.0122467				G3356	4.98479	3.73376	1.25103	0.335059
G3516	754.333	447.47	306.863	0.685773				G3516	754.333	447.47	306.863	0.685773				G8893	4.98278	1.87184	3.11094	1.66197
G13853	751.014	451.14	299.874	0.664703				G13853	751.014	451.14	299.874	0.664703				G19332	4.974	3.8967	1.0773	0.276465
G4136	749.602	395.367	354.235	0.895964				G4136	749.602	395.367	354.235	0.895964				G23800	4.9701	1.87785	3.09225	1.6467
G33073	745.71	438.714	306.995	0.699761				G33073	745.71	438.714	306.995	0.699761				G3642	4.95851	1.70144	3.25707	1.9143
G27134	744.97	700.112	44.8573	0.0640716				G27134	744.97	700.112	44.8573	0.0640716				G7573	4.9571	1.57798	3.37912	2.14142
G33022	741.138	735.032	6.10597	0.00830708				G33022	741.138	735.032	6.10597	0.00830708				G5807	4.95707	1.86935	3.08772	1.65176
G29017	739.384	604.102	135.282	0.223939				G29017	739.384	604.102	135.282	0.223939				G15124	4.95537	2.72606	2.22931	0.817778
G35880	734.344	382.951	351.393	0.917592				G35880	734.344	382.951	351.393	0.917592				G29255	4.95448	2.88154	2.07294	0.719387
G28427	729.942	238.436	491.507	2.06138				G28427	729.942	238.436	491.507	2.06138				G10635	4.95201	3.87907	1.07294	0.276598
G20767	727.765	671.269	56.4961	0.0841631				G20767	727.765	671.269	56.4961	0.0841631				G22719	4.94709	3.70396	1.24313	0.335622
G20113	727.085	627.761	99.3234	0.158218				G20113	727.085	627.761	99.3234	0.158218				G2830	4.9462	2.78316	2.16305	0.777192
G10293	726.679	95.6692	631.01	6.59575				G10293	726.679	95.6692	631.01	6.59575				G34580	4.94263	1.8652	3.07743	1.64992
G5309	725.091	628.768	96.3232	0.153194				G5309	725.091	628.768	96.3232	0.153194				G11837	4.94096	2.8296	2.11136	0.746166
G21708	719.899	251.332	468.567	1.86433				G21708	719.899	251.332	468.567	1.86433				G1009	4.93838	1.8511	3.08728	1.66781
G8230	719.091	627.938	91.1531	0.145163				G8230	719.091	627.938	91.1531	0.145163				G14891	4.93005	2.78131	2.14874	0.772564
G4561	716.871	636.081	80.7895	0.127011				G4561	716.871	636.081	80.7895	0.127011				G11557	4.92639	2.84236	2.08403	0.733206
G33498	716.727	497.84	218.886	0.439672				G33498	716.727	497.84	218.886	0.439672				G14164	4.92216	3.85318	1.06897	0.277426
G19086	713.01	664.26	48.7497	0.0733895				G19086	713.01	664.26	48.7497	0.0733895				G16335	4.92175	3.39952	1.52223	0.447778
G35208	711.887	664.188	47.6995	0.0718162				G35208	711.887	664.188	47.6995	0.0718162				G34796	4.92172	3.46394	1.45778	0.420846
G11936	710.159	692.448	17.7114	0.0255779				G11936	710.159	692.448	17.7114	0.0255779				G3007	4.92043	2.71268	2.20775	0.813864
G3512	709.731	560.064	149.667	0.267231				G3512	709.731	560.064	149.667	0.267231				G9291	4.91615	1.63155	3.2846	2.01318
G33592	709.645	508.449	201.195	0.395704				G33592	709.645	508.449	201.195	0.395704				G24263	4.91507	1.84111	3.07396	1.66962
G968	708.659	387.976	320.683	0.826552				G968	708.659	387.976	320.683	0.826552				G1368	4.90625	3.83187	1.07438	0.28038
G8511	704.171	516.473	187.698	0.363422				G8511	704.171	516.473	187.698	0.363422				G32869	4.90445	1.82582	3.07863	1.68617
G35378	699.635	652.137	47.4983	0.0728349				G35378	699.635	652.137	47.4983	0.0728349				G17890	4.90382	2.75298	2.15084	0.781278
G24388	693.588	646.072	47.5168	0.0735473				G24388	693.588	646.072	47.5168	0.0735473				G36029	4.89883	3.65195	1.24688	0.341429
G30919	692.397	641.103	51.2945	0.0800099				G30919	692.397	641.103	51.2945	0.0800099				G583	4.89674	3.60206	1.29468	0.359426
G6868	691.881	502.4	189.482	0.377153				G6868	691.881	502.4	189.482	0.377153				G5834	4.8927	1.81407	3.07863	1.69709
G16955	690.534	658.168	32.366	0.0491758				G16955	690.534	658.168	32.366	0.0491758				G5459	4.89185	3.664	1.22785	0.335112
G26448	685.449	670.815	14.6341	0.0218154				G26448	685.449	670.815	14.6341	0.0218154				G26153	4.88836	1.74224	3.14612	1.80579
G30550	683.492	638.992	44.4997	0.0696405				G30550	683.492	638.992	44.4997	0.0696405				G7508	4.87414	2.72113	2.15301	0.791217
G23806	682.574	652.97	29.6041	0.0453377				G23806	682.574	652.97	29.6041	0.0453377				G36542	4.8736	1.59721	3.27639	2.05132
G2034	681.394	632.711	48.6823	0.0769424				G2034	681.394	632.711	48.6823	0.0769424				G2324	4.86826	3.58959	1.27868	0.356218
G4898	680.364	387.787	292.576	0.754476				G4898	680.364	387.787	292.576	0.754476				G36622	4.86823	1.61883	3.2494	2.00725
G21790	680.237	559.194	121.043	0.216459				G21790	680.237	559.194	121.043	0.216459				G9728	4.86802	1.78861	3.0794	1.72167
G12474	676.409	553.478	122.931	0.222106				G12474	676.409	553.478	122.931	0.222106				G45	4.86759	1.77567	3.09192	1.74127
G6488	676.35	620.362	55.9883	0.0902511				G6488	676.35	620.362	55.9883	0.0902511				G27267	4.86626	1.77898	3.08728	1.73542
G21426	676.208	440.191	236.017	0.536169				G21426	676.208	440.191	236.017	0.536169				G29475	4.86267	1.78524	3.07743	1.72382
G5032	675.081	566.478	108.603	0.191717				G5032	675.081	566.478	108.603	0.191717				G3644	4.86126	2.28633	2.57494	1.12623
G21587	674.985	639.339	35.6457	0.055754				G21587	674.985	639.339	35.6457	0.055754				G31640	4.86095	1.62256	3.23839	1.99585
G26423	673.989	619.886	54.1036	0.0872799				G26423	673.989	619.886	54.1036	0.0872799				G12177	4.86066	2.64186	2.2188	0.839863
G15691	670.174	262.718	407.456	1.55093				G15691	670.174	262.718	407.456	1.55093				G21338	4.85097	1.7719	3.07907	1.73772
G1061	668.823	552.364	116.459	0.210837				G1061	668.823	552.364	116.459	0.210837				G22358	4.85007	2.77505	2.07501	0.747739
G22354	663.709	138.431	525.279	3.79453				G22354	663.709	138.431	525.279	3.79453				G13582	4.84916	1.68057	3.1686	1.88543
G36817	662.241	610.978	51.263	0.0839032				G36817	662.241	610.978	51.263	0.0839032				G2025	4.8457	3.73259	1.11311	0.298214
G14787	660.832	621.649	39.1835	0.0630315				G14787	660.832	621.649	39.1835	0.0630315				G31113	4.84455	2.39878	2.44577	1.01959
G16886	660.111	640.555	19.5562	0.0305301				G16886	660.111	640.555	19.5562	0.0305301				G13268	4.84206	2.76186	2.0802	0.753185
G25341	659.978	417.253	242.725	0.58172				G25341	659.978	417.253	242.725	0.58172				G23170	4.83818	3.67188	1.1663	0.317631
G9102	659.491	374.662	284.829	0.76023				G9102	659.491	374.662	284.829	0.76023				G12610	4.83376	3.75938	1.07438	0.285786
G14526	657.538	527.345	130.193	0.246884				G14526	657.538	527.345	130.193	0.246884				G2595	4.82567	1.74627	3.0794	1.76342
G2211	657.22	530.053	127.167	0.239913				G2211	657.22	530.053	127.167	0.239913				G24879	4.82449	1.74106	3.08343	1.77101
G5288	656.147	559.337	96.8103	0.17308				G5288	656.147	559.337	96.8103	0.17308				G10452	4.81831	1.64825	3.17006	1.92329
G29658	650.961	608.504	42.4567	0.0697722				G29658	650.961	608.504	42.4567	0.0697722				G15062	4.81473	1.72745	3.08728	1.78719
G34241	649.649	627.915	21.7339	0.0346128				G34241	649.649	627.915	21.7339	0.0346128				G29054	4.80726	3.72415	1.08311	0.290834
G26146	647.65	213.437	434.213	2.03439				G26146	647.65	213.437	434.213	2.03439				G12661	4.79282	1.55844	3.23438	2.07539
G14892	646.349	589.586	56.7634	0.0962768				G14892	646.349	589.586	56.7634	0.0962768				G3715	4.78685	3.55168	1.23517	0.347769
G8411	645.553	395.404	250.149	0.632642				G8411	645.553	395.404	250.149	0.632642				G29528	4.7841	1.66615	3.11795	1.87135
G6084	641.73	401.004	240.726	0.600307				G6084	641.73	401.004	240.726	0.600307				G24096	4.77945	1.69394	3.08551	1.8215
G13122	641.04	427.792	213.248	0.498485				G13122	641.04	427.792	213.248	0.498485				G19426	4.77795	2.6857	2.09225	0.779035
G3311	636.293	615.996	20.2975	0.0329507				G3311	636.293	615.996	20.2975	0.0329507				G12052	4.77754	1.7046	3.07294	1.80273
G20011	636.087	542.654	93.4327	0.172177				G20011	636.087	542.654	93.4327	0.172177				G27077	4.77412	2.6912	2.08292	0.773975
G5251	635.832	622.649	13.1824	0.0211715				G5251	635.832	622.649	13.1824	0.0211715				G7859	4.77339	1.59574	3.17765	1.99134
G31073	635.547	546.914	88.6333	0.162061				G31073	635.547	546.914	88.6333	0.162061				G13265	4.77003	1.61517	3.15486	1.95326
G31377	631.854	571.094	60.76	0.106392				G31377	631.854	571.094	60.76	0.106392				G27554	4.7693	1.68473	3.08456	1.83089
G8854	631.574	588.49	43.0837	0.0732105				G8854	631.574	588.49	43.0837	0.0732105				G4298	4.76523	1.60874	3.1565	1.96209
G27504	631.18	621.508	9.67204	0.0155622				G27504	631.18	621.508	9.67204	0.0155622				G35433	4.76467	3.46526	1.29941	0.374983
G27324	629.926	584.968	44.958	0.0768554				G27324	629.926	584.968	44.958	0.0768554				G31506	4.76433	1.6869	3.07743	1.82431
G20146	629.746	585.248	44.4981	0.0760329				G20146	629.746	585.248	44.4981	0.0760329				G10067	4.76182	2.68785	2.07396	0.771605
G25569	626.731	589.049	37.6822	0.0639713				G25569	626.731	589.049	37.6822	0.0639713				G19751	4.74989	1.66697	3.08292	1.84942
G4963	626.251	615.226	11.0252	0.0179207				G4963	626.251	615.226	11.0252	0.0179207				G27533	4.73583	2.57548	2.16035	0.838813
G28962	624.601	609.613	14.9879	0.0245859				G28962	624.601	609.613	14.9879	0.0245859				G17796	4.73171	1.63979	3.09192	1.88556
G15256	622.01	557.58	64.4297	0.115552				G15256	622.01	557.58	64.4297	0.115552				G27864	4.73165	3.58553	1.14612	0.319652
G19148	621.239	589.298	31.9411	0.0542019				G19148	621.239	589.298	31.9411	0.0542019				G28094	4.73133	1.63941	3.09192	1.886
G11457	620.897	585.427	35.4694	0.0605871				G11457	620.897	585.427	35.4694	0.0605871				G5786	4.73038	1.65131	3.07907	1.86462
G16701	619.599	575.547	44.0513	0.0765381				G16701	619.599	575.547	44.0513	0.0765381				G28097	4.73	1.63545	3.09455	1.89217
G16865	619.492	591.299	28.1923	0.0476785				G16865	619.492	591.299	28.1923	0.0476785				G13118	4.72786	1.63804	3.08982	1.88629
G16018	618.936	549.521	69.4157	0.12632				G16018	618.936	549.521	69.4157	0.12632				G23100	4.72554	1.50648	3.21906	2.13681
G3539	616.28	389.62	226.66	0.581746				G3539	616.28	389.62	226.66	0.581746				G23829	4.7241	1.64067	3.08344	1.87938
G21246	615.791	401.259	214.532	0.534646				G21246	615.791	401.259	214.532	0.534646				G33290	4.71954	1.5537	3.16584	2.03762
G612	615.601	455.568	160.033	0.351282				G612	615.601	455.568	160.033	0.351282				G10781	4.71567	1.63901	3.07666	1.87715
G22058	614.777	460.575	154.201	0.334801				G22058	614.777	460.575	154.201	0.334801				G17247	4.71302	2.50777	2.20525	0.879365
G34456	612.345	319.295	293.05	0.917801				G34456	612.345	319.295	293.05	0.917801				G17167	4.71275	1.62293	3.08982	1.90385
G35563	610.865	589.207	21.6579	0.0367576				G35563	610.865	589.207	21.6579	0.0367576				G35142	4.70983	2.61791	2.09192	0.799081
G4170	604.356	404.283	200.073	0.494882				G4170	604.356	404.283	200.073	0.494882				G31665	4.70943	1.58952	3.11991	1.9628
G13386	604.296	462.652	141.644	0.306158				G13386	604.296	462.652	141.644	0.306158				G34846	4.70485	2.61771	2.08714	0.797314
G16831	603.696	519.01	84.6854	0.163167				G16831	603.696	519.01	84.6854	0.163167				G3515	4.70297	1.62609	3.07688	1.89219
G18120	602.749	550.887	51.8622	0.0941431				G18120	602.749	550.887	51.8622	0.0941431				G26	4.70254	2.41895	2.28359	0.944045
G27060	602.317	530.829	71.4881	0.134673				G27060	602.317	530.829	71.4881	0.134673				G13116	4.69902	2.49306	2.20596	0.884842
G31662	600.261	579.54	20.7212	0.0357547				G31662	600.261	579.54	20.7212	0.0357547				G28841	4.69557	2.37438	2.3212	0.977603
G15756	599.724	192.635	407.089	2.11326				G15756	599.724	192.635	407.089	2.11326				G34228	4.69399	1.61656	3.07743	1.90369
G23125	596.732	386.595	210.137	0.543558				G23125	596.732	386.595	210.137	0.543558				G5903	4.6893	2.47865	2.21065	0.891879
G29375	596.449	469.538	126.911	0.270289				G29375	596.449	469.538	126.911	0.270289				G17013	4.68893	3.57152	1.11741	0.312867
G26180	594.973	291.217	303.756	1.04306				G26180	594.973	291.217	303.756	1.04306				G14122	4.68705	1.60361	3.08344	1.9228
G9361	594.216	440.643	153.573	0.34852				G9361	594.216	440.643	153.573	0.34852				G17526	4.68688	1.61544	3.07144	1.9013
G34528	592.635	573.449	19.1855	0.0334564				G34528	592.635	573.449	19.1855	0.0334564				G24016	4.68079	1.60139	3.0794	1.92295
G27353	592.484	553.54	38.9442	0.0703549				G27353	592.484	553.54	38.9442	0.0703549				G9093	4.67493	2.52313	2.15181	0.852834
G18936	591.789	495.589	96.1999	0.194112				G18936	591.789	495.589	96.1999	0.194112				G7869	4.66972	1.59065	3.07907	1.93573
G15943	590.508	389.342	201.166	0.516682				G15943	590.508	389.342	201.166	0.516682				G3443	4.66967	2.49205	2.17762	0.873825
G23963	589.006	403.45	185.556	0.459922				G23963	589.006	403.45	185.556	0.459922				G21495	4.66309	3.58566	1.07743	0.300482
G2656	586.197	487.396	98.8009	0.202712				G2656	586.197	487.396	98.8009	0.202712				G17319	4.65949	1.56916	3.09034	1.96943
G14374	581.121	557.962	23.1598	0.0415078				G14374	581.121	557.962	23.1598	0.0415078				G29779	4.65924	3.42486	1.23438	0.360416
G16940	578.55	447.338	131.213	0.293319				G16940	578.55	447.338	131.213	0.293319				G30081	4.65717	2.47919	2.17798	0.878506
G366	578.18	510.96	67.2199	0.131556				G366	578.18	510.96	67.2199	0.131556				G192	4.65673	1.57766	3.07907	1.95167
G27401	577.806	195.033	382.773	1.96261				G27401	577.806	195.033	382.773	1.96261				G13935	4.65302	1.58008	3.07294	1.9448
G27992	577.555	378.543	199.011	0.52573				G27992	577.555	378.543	199.011	0.52573				G33897	4.64844	2.56441	2.08403	0.812677
G16022	576.815	433.099	143.716	0.331832				G16022	576.815	433.099	143.716	0.331832				G5060	4.64457	2.39651	2.24807	0.938061
G15982	576.772	289.216	287.556	0.99426				G15982	576.772	289.216	287.556	0.99426				G36565	4.64268	3.48081	1.16186	0.333791
G16707	575.784	444.148	131.636	0.296379				G16707	575.784	444.148	131.636	0.296379				G26962	4.63977	1.47134	3.16843	2.15343
G24467	575.659	508.809	66.85	0.131385				G24467	575.659	508.809	66.85	0.131385				G18207	4.63836	3.325	1.31336	0.394996
G16958	574.796	363.322	211.475	0.582059				G16958	574.796	363.322	211.475	0.582059				G22876	4.63665	2.37722	2.25942	0.950446
G11846	572.422	506.295	66.127	0.13061				G11846	572.422	506.295	66.127	0.13061				G30967	4.63024	2.44837	2.18188	0.891155
G27142	572.121	545.681	26.44	0.0484532				G27142	572.121	545.681	26.44	0.0484532				G20411	4.62612	3.53157	1.09455	0.309932
G7396	571.755	482.165	89.5897	0.185807				G7396	571.755	482.165	89.5897	0.185807				G16413	4.62555	1.54888	3.07666	1.98637
G5798	571.318	213.323	357.995	1.67818				G5798	571.318	213.323	357.995	1.67818				G20005	4.6197	1.54283	3.07688	1.99431
G35363	571.072	282.422	288.65	1.02205				G35363	571.072	282.422	288.65	1.02205				G30902	4.61755	1.53735	3.0802	2.00357
G28998	569.681	527.32	42.3607	0.0803321				G28998	569.681	527.32	42.3607	0.0803321				G9852	4.61735	2.4715	2.14585	0.868237
G23825	568.912	364.031	204.881	0.562813				G23825	568.912	364.031	204.881	0.562813				G704	4.61453	1.44995	3.16458	2.18255
G33499	567.571	547.975	19.5966	0.0357619				G33499	567.571	547.975	19.5966	0.0357619				G27261	4.6132	2.52917	2.08403	0.823998
G30891	567.319	462.104	105.215	0.227687				G30891	567.319	462.104	105.215	0.227687				G16867	4.61168	2.53425	2.07743	0.81974
G8252	566.986	506.333	60.6532	0.119789				G8252	566.986	506.333	60.6532	0.119789				G12035	4.61143	3.03359	1.57784	0.520123
G18889	563.351	491.469	71.8815	0.146258				G18889	563.351	491.469	71.8815	0.146258				G32894	4.6098	1.52669	3.08311	2.01948
G30122	563.268	542.053	21.2149	0.0391381				G30122	563.268	542.053	21.2149	0.0391381				G33557	4.60592	3.48562	1.12029	0.321404
G2446	563.244	538.043	25.2005	0.0468372				G2446	563.244	538.043	25.2005	0.0468372				G1128	4.60401	1.51419	3.08982	2.04058
G23562	562.922	405.369	157.553	0.388666				G23562	562.922	405.369	157.553	0.388666				G12084	4.60343	3.15543	1.448	0.45889
G27939	558.886	340.87	218.016	0.639589				G27939	558.886	340.87	218.016	0.639589				G10013	4.60077	2.37473	2.22604	0.937388
G30094	558.203	354.567	203.636	0.574325				G30094	558.203	354.567	203.636	0.574325				G23110	4.5942	1.5188	3.07541	2.0249
G22036	557.857	537.833	20.0247	0.0372323				G22036	557.857	537.833	20.0247	0.0372323				G3102	4.58439	1.50498	3.0794	2.04614
G2118	557.665	495.939	61.7266	0.124464				G2118	557.665	495.939	61.7266	0.124464				G12564	4.58304	1.41778	3.16526	2.23254
G32863	552.425	513.972	38.453	0.0748153				G32863	552.425	513.972	38.453	0.0748153				G33405	4.58291	1.49999	3.08292	2.05529
G14977	551.924	450.08	101.844	0.226281				G14977	551.924	450.08	101.844	0.226281				G27385	4.57738	1.49395	3.08343	2.06394
G6328	551.73	532.232	19.4982	0.0366348				G6328	551.73	532.232	19.4982	0.0366348				G28819	4.57492	1.50054	3.07438	2.04885
G26612	550.559	273.646	276.913	1.01194				G26612	550.559	273.646	276.913	1.01194				G20289	4.57166	2.34417	2.22749	0.950226
G32664	549.527	271.557	277.969	1.02361				G32664	549.527	271.557	277.969	1.02361				G17968	4.57136	1.49595	3.07541	2.05582
G35689	546.535	87.1878	459.347	5.26848				G35689	546.535	87.1878	459.347	5.26848				G30893	4.57122	1.41637	3.15486	2.22743
G10339	546.473	540.529	5.94399	0.0109966				G10339	546.473	540.529	5.94399	0.0109966				G1104	4.5605	1.48056	3.07994	2.08025
G7917	541.02	500.916	40.1037	0.0800608				G7917	541.02	500.916	40.1037	0.0800608				G35662	4.55881	1.46433	3.09448	2.11325
G14500	539.904	510.704	29.1998	0.0571756				G14500	539.904	510.704	29.1998	0.0571756				G6817	4.55604	1.44469	3.11136	2.15366
G12229	539.775	488.37	51.4045	0.105257				G12229	539.775	488.37	51.4045	0.105257				G8865	4.55299	2.31818	2.23481	0.964038
G6031	539.757	517.583	22.1736	0.0428407				G6031	539.757	517.583	22.1736	0.0428407				G7300	4.5489	1.43755	3.11136	2.16435
G36031	538.482	523.761	14.7206	0.0281055				G36031	538.482	523.761	14.7206	0.0281055				G35214	4.54589	2.13979	2.4061	1.12446
G20413	534.864	453.48	81.3838	0.179465				G20413	534.864	453.48	81.3838	0.179465				G13910	4.54399	1.45627	3.08772	2.12029
G12518	533.878	495.196	38.6824	0.0781154				G12518	533.878	495.196	38.6824	0.0781154				G35325	4.53349	1.36765	3.16584	2.3148
G19763	529.984	494.704	35.2806	0.0713167				G19763	529.984	494.704	35.2806	0.0713167				G36106	4.53267	1.44483	3.08783	2.13716
G30053	529.709	340.611	189.098	0.555175				G30053	529.709	340.611	189.098	0.555175				G29364	4.53202	1.37596	3.15606	2.29372
G25274	529.311	263.63	265.681	1.00778				G25274	529.311	263.63	265.681	1.00778				G7133	4.53166	2.3347	2.19695	0.941001
G33324	529.018	485.093	43.9252	0.0905501				G33324	529.018	485.093	43.9252	0.0905501				G5943	4.52777	1.44837	3.0794	2.12612
G28562	528.963	391.49	137.473	0.351153				G28562	528.963	391.49	137.473	0.351153				G14052	4.52428	1.44685	3.07743	2.12699
G22677	528.446	339.15	189.296	0.558149				G22677	528.446	339.15	189.296	0.558149				G10704	4.52427	1.17476	3.34952	2.85124
G2066	527.222	293.054	234.168	0.799061				G2066	527.222	293.054	234.168	0.799061				G33848	4.52394	2.94561	1.57833	0.535825
G14685	526.597	400.125	126.472	0.316081				G14685	526.597	400.125	126.472	0.316081				G3528	4.51681	3.36473	1.15208	0.3424
G13828	522.592	343.41	179.181	0.52177				G13828	522.592	343.41	179.181	0.52177				G18370	4.51407	2.43905	2.07501	0.850746
G13034	522.577	445.185	77.3924	0.173843				G13034	522.577	445.185	77.3924	0.173843				G28888	4.51186	2.4273	2.08456	0.858801
G23999	521.185	433.465	87.7201	0.202369				G23999	521.185	433.465	87.7201	0.202369				G34551	4.50473	2.29784	2.2069	0.960423
G26858	520.678	303.928	216.75	0.713163				G26858	520.678	303.928	216.75	0.713163				G30653	4.49964	2.42101	2.07863	0.85858
G11483	519.353	174.404	344.949	1.97787				G11483	519.353	174.404	344.949	1.97787				G24826	4.4985	2.42348	2.07501	0.856211
G1188	519.322	445.388	73.9346	0.166001				G1188	519.322	445.388	73.9346	0.166001				G5314	4.49801	2.4125	2.08551	0.864458
G24266	518.88	466.717	52.1633	0.111766				G24266	518.88	466.717	52.1633	0.111766				G21166	4.49388	1.34761	3.14627	2.33471
G747	518.288	262.133	256.155	0.977195				G747	518.288	262.133	256.155	0.977195				G17450	4.49138	2.4145	2.07688	0.860169
G5048	516.479	455.627	60.8515	0.133555				G5048	516.479	455.627	60.8515	0.133555				G5554	4.4896	1.40177	3.08783	2.20282
G409	515.795	432.847	82.9472	0.191631				G409	515.795	432.847	82.9472	0.191631				G12742	4.48577	1.41587	3.0699	2.16822
G7087	515.345	466.077	49.2679	0.105708				G7087	515.345	466.077	49.2679	0.105708				G4376	4.4792	1.38887	3.09034	2.22508
G19131	515.041	481.365	33.6756	0.0699585				G19131	515.041	481.365	33.6756	0.0699585				G11976	4.47627	2.98763	1.48865	0.49827
G24261	514.64	511.224	3.41572	0.00668145				G24261	514.64	511.224	3.41572	0.00668145				G1207	4.47425	2.382	2.09225	0.87836
G32901	514.617	397.674	116.944	0.29407				G32901	514.617	397.674	116.944	0.29407				G18364	4.46749	3.39533	1.07216	0.315775
G3365	512.417	407.991	104.426	0.255951				G3365	512.417	407.991	104.426	0.255951				G28747	4.46553	1.38559	3.07994	2.22284
G11850	509.75	260.744	249.006	0.954981				G11850	509.75	260.744	249.006	0.954981				G34857	4.46243	3.19773	1.2647	0.3955
G31641	508.803	491.443	17.3591	0.0353226				G31641	508.803	491.443	17.3591	0.0353226				G430	4.45804	2.29846	2.15958	0.939577
G29518	508.276	497.922	10.354	0.0207944				G29518	508.276	497.922	10.354	0.0207944				G8818	4.45745	2.38847	2.06897	0.866232
G23992	507.572	277.49	230.082	0.829157				G23992	507.572	277.49	230.082	0.829157				G33943	4.45585	1.38595	3.0699	2.21502
G31510	505.202	344.544	160.657	0.466289				G31510	505.202	344.544	160.657	0.466289				G5291	4.45383	3.25658	1.19725	0.36764
G34681	504.41	477.502	26.9086	0.0563529				G34681	504.41	477.502	26.9086	0.0563529				G32012	4.45271	1.3696	3.08311	2.2511
G19630	504.085	464.273	39.8121	0.0857516				G19630	504.085	464.273	39.8121	0.0857516				G5914	4.44804	1.37588	3.07216	2.23287
G24441	499.984	281.353	218.631	0.777072				G24441	499.984	281.353	218.631	0.777072				G4311	4.44508	1.27924	3.16584	2.47479
G32586	499.597	379.206	120.391	0.317481				G32586	499.597	379.206	120.391	0.317481				G31973	4.44161	3.36221	1.0794	0.321039
G4186	499.481	423.341	76.1394	0.179854				G4186	499.481	423.341	76.1394	0.179854				G4487	4.44129	2.33413	2.10716	0.902759
G17476	498.732	449.744	48.9875	0.108923				G17476	498.732	449.744	48.9875	0.108923				G21465	4.44063	2.17008	2.27055	1.0463
G30929	496.367	261.149	235.218	0.900704				G30929	496.367	261.149	235.218	0.900704				G19391	4.43767	1.34313	3.09455	2.30399
G7549	496.159	440.953	55.206	0.125197				G7549	496.159	440.953	55.206	0.125197				G26868	4.43557	3.122	1.31357	0.420747
G14772	493.599	461.611	31.9881	0.0692968				G14772	493.599	461.611	31.9881	0.0692968				G569	4.4336	1.27913	3.15447	2.4661
G20260	493.36	324.078	169.282	0.52235				G20260	493.36	324.078	169.282	0.52235				G36009	4.43151	1.35935	3.07216	2.26001
G3488	493.173	435.016	58.1565	0.133688				G3488	493.173	435.016	58.1565	0.133688				G33075	4.42838	1.34066	3.08772	2.30313
G15934	489.162	413.286	75.8762	0.183593				G15934	489.162	413.286	75.8762	0.183593				G31585	4.42616	2.34596	2.0802	0.886714
G26707	487.967	394.887	93.0804	0.235714				G26707	487.967	394.887	93.0804	0.235714				G31012	4.42223	2.30482	2.11741	0.91869
G1131	487.702	281.101	206.602	0.734974				G1131	487.702	281.101	206.602	0.734974				G31847	4.42024	1.33473	3.08551	2.31171
G10008	487.408	456.795	30.6124	0.0670157				G10008	487.408	456.795	30.6124	0.0670157				G36108	4.41706	3.3325	1.08456	0.325451
G15443	486.551	155.12	331.431	2.1366				G15443	486.551	155.12	331.431	2.1366				G5089	4.41685	2.33666	2.0802	0.890244
G16716	485.219	466.497	18.7224	0.0401341				G16716	485.219	466.497	18.7224	0.0401341				G26668	4.40726	2.31954	2.08772	0.900058
G33482	485.168	442.271	42.8967	0.0969918				G33482	485.168	442.271	42.8967	0.0969918				G12947	4.40659	3.31931	1.08728	0.327561
G29744	484.575	475.621	8.95331	0.0188245				G29744	484.575	475.621	8.95331	0.0188245				G33457	4.40357	1.32417	3.0794	2.32554
G875	483.916	462.34	21.5757	0.0466663				G875	483.916	462.34	21.5757	0.0466663				G34429	4.39824	2.31513	2.08311	0.899779
G12945	482.813	327.049	155.763	0.476268				G12945	482.813	327.049	155.763	0.476268				G29070	4.39571	1.3163	3.0794	2.33943
G26937	482.209	459.823	22.3857	0.0486834				G26937	482.209	459.823	22.3857	0.0486834				G34218	4.3952	2.31854	2.07666	0.895677
G5294	482.038	463.722	18.3154	0.0394965				G5294	482.038	463.722	18.3154	0.0394965				G4768	4.39207	2.11558	2.27649	1.07606
G10176	481.852	258.541	223.311	0.863736				G10176	481.852	258.541	223.311	0.863736				G35865	4.39091	1.96635	2.42456	1.23302
G32583	480.403	417.124	63.2787	0.151702				G32583	480.403	417.124	63.2787	0.151702				G16594	4.39038	2.3031	2.08728	0.906291
G7025	480.31	370.727	109.583	0.295588				G7025	480.31	370.727	109.583	0.295588				G22730	4.38639	2.31648	2.0699	0.893555
G11639	479.572	468.031	11.541	0.0246586				G11639	479.572	468.031	11.541	0.0246586				G27161	4.38164	3.30663	1.07501	0.325109
G4731	478.73	294.049	184.681	0.628064				G4731	478.73	294.049	184.681	0.628064				G12011	4.37844	3.20275	1.17569	0.367087
G4722	476.013	257.021	218.993	0.852043				G4722	476.013	257.021	218.993	0.852043				G12511	4.37771	2.84909	1.52862	0.53653
G19554	475.632	446.417	29.2147	0.0654427				G19554	475.632	446.417	29.2147	0.0654427				G13697	4.37408	2.29414	2.07994	0.906629
G35372	475.456	330.581	144.875	0.438245				G35372	475.456	330.581	144.875	0.438245				G35736	4.37121	2.28665	2.08456	0.911625
G12044	474.981	438.164	36.8162	0.0840238				G12044	474.981	438.164	36.8162	0.0840238				G26210	4.36844	1.28904	3.0794	2.38891
G6494	474.781	435.262	39.5189	0.0907935				G6494	474.781	435.262	39.5189	0.0907935				G25496	4.36085	2.27793	2.08292	0.914391
G12079	474.393	310.126	164.268	0.529681				G12079	474.393	310.126	164.268	0.529681				G18606	4.35946	1.19822	3.16124	2.63828
G5951	473.001	427.602	45.3991	0.106171				G5951	473.001	427.602	45.3991	0.106171				G25762	4.35364	3.2665	1.08714	0.332815
G29867	472.214	365.785	106.429	0.290961				G29867	472.214	365.785	106.429	0.290961				G18609	4.34712	1.2552	3.09192	2.46329
G12409	472.055	457.785	14.2702	0.0311722				G12409	472.055	457.785	14.2702	0.0311722				G12173	4.34183	2.25872	2.08311	0.922253
G24766	471.593	430.164	41.429	0.0963099				G24766	471.593	430.164	41.429	0.0963099				G4450	4.33798	1.26807	3.0699	2.42092
G31039	471.125	192.872	278.253	1.44268				G31039	471.125	192.872	278.253	1.44268				G31000	4.33503	2.17753	2.1575	0.990798
G12367	468.129	211.57	256.559	1.21265				G12367	468.129	211.57	256.559	1.21265				G27084	4.33095	2.00061	2.33034	1.16482
G31269	467.848	391.34	76.508	0.195502				G31269	467.848	391.34	76.508	0.195502				G13005	4.3309	1.24686	3.08403	2.47343
G3323	467.721	398.779	68.9423	0.172884				G3323	467.721	398.779	68.9423	0.172884				G5619	4.33075	3.2039	1.12685	0.35171
G24829	467.602	270.531	197.071	0.728458				G24829	467.602	270.531	197.071	0.728458				G34268	4.32652	3.2367	1.08982	0.336707
G34127	467.45	359.663	107.787	0.299688				G34127	467.45	359.663	107.787	0.299688				G15777	4.32186	3.09955	1.22231	0.394351
G22462	466.678	459.844	6.83417	0.0148619				G22462	466.678	459.844	6.83417	0.0148619				G9365	4.3218	1.25283	3.06897	2.44963
G3235	466.021	218.423	247.599	1.13357				G3235	466.021	218.423	247.599	1.13357				G11886	4.32157	1.21657	3.105	2.55226
G18876	465.719	253.238	212.481	0.839057				G18876	465.719	253.238	212.481	0.839057				G11647	4.32092	2.22637	2.09455	0.940789
G11410	465.636	328.768	136.867	0.416303				G11410	465.636	328.768	136.867	0.416303				G27171	4.3205	1.24509	3.07541	2.47003
G31563	465.358	370.092	95.2656	0.25741				G31563	465.358	370.092	95.2656	0.25741				G6875	4.31898	3.04782	1.27115	0.417069
G19134	464.275	429.472	34.8031	0.0810369				G19134	464.275	429.472	34.8031	0.0810369				G1316	4.30866	1.2347	3.07396	2.48965
G36602	462.767	407.463	55.3044	0.135729				G36602	462.767	407.463	55.3044	0.135729				G8934	4.30506	1.2329	3.07216	2.49183
G31235	462.131	419.89	42.2408	0.1006				G31235	462.131	419.89	42.2408	0.1006				G36803	4.30149	1.21377	3.08772	2.54391
G34880	460.939	282.568	178.371	0.631249				G34880	460.939	282.568	178.371	0.631249				G33127	4.3006	2.11568	2.18492	1.03273
G34913	459.823	422.066	37.7574	0.0894585				G34913	459.823	422.066	37.7574	0.0894585				G6080	4.29306	2.03701	2.25605	1.10753
G9929	456.721	446.341	10.3801	0.0232559				G9929	456.721	446.341	10.3801	0.0232559				G30598	4.29017	2.20725	2.08292	0.943673
G31985	456.274	442.332	13.9417	0.0315187				G31985	456.274	442.332	13.9417	0.0315187				G33934	4.29008	3.21792	1.07216	0.333184
G3649	455.776	440.483	15.2932	0.034719				G3649	455.776	440.483	15.2932	0.034719				G20072	4.28581	2.196	2.08982	0.95165
G20377	455.059	323.823	131.237	0.405274				G20377	455.059	323.823	131.237	0.405274				G13007	4.2797	2.20754	2.07216	0.938675
G11956	454.459	343.663	110.796	0.322397				G11956	454.459	343.663	110.796	0.322397				G2233	4.27372	2.18147	2.09225	0.959103
G5563	454.314	428.358	25.9567	0.060596				G5563	454.314	428.358	25.9567	0.060596				G1500	4.2719	2.18734	2.08456	0.953014
G13044	454.211	441.128	13.0832	0.0296585				G13044	454.211	441.128	13.0832	0.0296585				G21701	4.26931	3.19067	1.07863	0.338058
G20393	451.261	129.843	321.418	2.47543				G20393	451.261	129.843	321.418	2.47543				G3405	4.26884	2.02613	2.24272	1.1069
G16085	450.948	284.153	166.795	0.586989				G16085	450.948	284.153	166.795	0.586989				G942	4.26812	3.05371	1.21441	0.397683
G29488	449.503	358.782	90.7207	0.252857				G29488	449.503	358.782	90.7207	0.252857				G4456	4.2562	2.17954	2.07666	0.952799
G7961	448.109	422.522	25.5874	0.0605587				G7961	448.109	422.522	25.5874	0.0605587				G20432	4.24964	2.17221	2.07743	0.956367
G91	442.711	419.871	22.8405	0.054399				G91	442.711	419.871	22.8405	0.054399				G10071	4.2454	2.15768	2.08772	0.967576
G35344	442.671	272.541	170.131	0.62424				G35344	442.671	272.541	170.131	0.62424				G474	4.24485	2.0776	2.16725	1.04315
G9703	440.155	282.627	157.528	0.557369				G9703	440.155	282.627	157.528	0.557369				G9336	4.24241	3.07861	1.1638	0.378029
G23006	439.769	412.279	27.4899	0.066678				G23006	439.769	412.279	27.4899	0.066678				G13412	4.23707	1.73905	2.49802	1.43643
G10355	439.058	295.642	143.416	0.485099				G10355	439.058	295.642	143.416	0.485099				G26991	4.23084	2.02903	2.20181	1.08515
G8532	438.664	388.994	49.6694	0.127687				G8532	438.664	388.994	49.6694	0.127687				G24048	4.22269	1.71557	2.50712	1.46139
G34048	438.036	245.976	192.06	0.780809				G34048	438.036	245.976	192.06	0.780809				G26642	4.21714	2.05223	2.16491	1.05491
G31637	436.418	417.972	18.4459	0.044132				G31637	436.418	417.972	18.4459	0.044132				G24872	4.20701	3.13804	1.06897	0.34065
G36839	436.26	379.095	57.1651	0.150794				G36839	436.26	379.095	57.1651	0.150794				G31221	4.2065	1.856	2.3505	1.26643
G35404	436.025	246.968	189.057	0.76551				G35404	436.025	246.968	189.057	0.76551				G36628	4.20493	2.86434	1.34059	0.468027
G20684	434.539	405.263	29.2754	0.0722379				G20684	434.539	405.263	29.2754	0.0722379				G21084	4.20048	2.78588	1.4146	0.507775
G31288	434.207	416.68	17.5268	0.042063				G31288	434.207	416.68	17.5268	0.042063				G26256	4.18918	2.11012	2.07907	0.985286
G4203	433.949	357.182	76.7675	0.214926				G4203	433.949	357.182	76.7675	0.214926				G165	4.18837	2.10494	2.08343	0.989782
G15096	433.937	400.575	33.3619	0.083285				G15096	433.937	400.575	33.3619	0.083285				G35922	4.18433	3.094	1.09034	0.352404
G34374	433.84	427.414	6.42594	0.0150345				G34374	433.84	427.414	6.42594	0.0150345				G3705	4.18336	2.04223	2.14113	1.04843
G27932	432.61	196.148	236.463	1.20553				G27932	432.61	196.148	236.463	1.20553				G10224	4.17425	2.01215	2.1621	1.07452
G11895	431.919	273.792	158.127	0.577545				G11895	431.919	273.792	158.127	0.577545				G12483	4.17206	1.9599	2.21216	1.12871
G17532	429.47	166.92	262.55	1.57291				G17532	429.47	166.92	262.55	1.57291				G25694	4.16909	2.09166	2.07743	0.993197
G4207	429.175	411.754	17.4207	0.0423085				G4207	429.175	411.754	17.4207	0.0423085				G16862	4.15642	3.07091	1.08551	0.353481
G12618	428.832	253.284	175.548	0.693086				G12618	428.832	253.284	175.548	0.693086				G32278	4.14732	1.93065	2.21667	1.14814
G22389	427.428	243.58	183.848	0.754776				G22389	427.428	243.58	183.848	0.754776				G3168	4.14307	1.98349	2.15958	1.08878
G14432	426.526	367.113	59.4134	0.161839				G14432	426.526	367.113	59.4134	0.161839				G32446	4.13979	2.06763	2.07216	1.00219
G42	424.477	336.354	88.1238	0.261998				G42	424.477	336.354	88.1238	0.261998				G17814	4.13553	2.0569	2.07863	1.01057
G1710	424.471	146.692	277.779	1.89363				G1710	424.471	146.692	277.779	1.89363				G29778	4.13513	2.60823	1.5269	0.585419
G36850	424.135	369.523	54.6124	0.147792				G36850	424.135	369.523	54.6124	0.147792				G3557	4.12999	3.03544	1.09455	0.360589
G16327	423.108	114.746	308.362	2.68735				G16327	423.108	114.746	308.362	2.68735				G28531	4.1259	2.83595	1.28995	0.454855
G14425	422.281	208.159	214.122	1.02865				G14425	422.281	208.159	214.122	1.02865				G28884	4.12554	2.84863	1.2769	0.448252
G10377	421.103	225.189	195.914	0.869998				G10377	421.103	225.189	195.914	0.869998				G17650	4.12065	2.04159	2.07907	1.01836
G11893	418.973	353.99	64.9838	0.183575				G11893	418.973	353.99	64.9838	0.183575				G4405	4.11995	1.95524	2.16471	1.10713
G18430	418.541	269.989	148.552	0.550216				G18430	418.541	269.989	148.552	0.550216				G31552	4.11543	2.04105	2.07438	1.01633
G21459	418.187	273.558	144.628	0.528693				G21459	418.187	273.558	144.628	0.528693				G24876	4.11075	2.01626	2.09448	1.03879
G11499	417.947	236.631	181.316	0.766242				G11499	417.947	236.631	181.316	0.766242				G128	4.10817	2.02361	2.08456	1.03012
G26931	417.903	223.786	194.117	0.867422				G26931	417.903	223.786	194.117	0.867422				G8808	4.10421	1.93294	2.17126	1.12329
G32630	417.727	361.501	56.2269	0.155537				G32630	417.727	361.501	56.2269	0.155537				G12234	4.07629	1.83247	2.24382	1.22448
G1851	416.778	300.052	116.726	0.38902				G1851	416.778	300.052	116.726	0.38902				G3582	4.07387	1.9038	2.17006	1.13985
G21787	416.636	407.614	9.02168	0.0221329				G21787	416.636	407.614	9.02168	0.0221329				G24846	4.06728	1.90283	2.16445	1.13749
G36881	415.996	395.561	20.4344	0.0516591				G36881	415.996	395.561	20.4344	0.0516591				G5844	4.06367	2.97639	1.08728	0.365301
G27741	415.968	363.201	52.7667	0.145282				G27741	415.968	363.201	52.7667	0.145282				G15181	4.05951	1.97659	2.08292	1.0538
G32588	415.908	308.433	107.475	0.348454				G32588	415.908	308.433	107.475	0.348454				G16608	4.05559	2.82463	1.23096	0.435795
G32573	414.638	363.532	51.1059	0.140582				G32573	414.638	363.532	51.1059	0.140582				G12393	4.05531	1.9698	2.08551	1.05874
G4727	414.216	169.913	244.303	1.43781				G4727	414.216	169.913	244.303	1.43781				G36397	4.05251	2.98261	1.0699	0.358714
G30143	413.028	374.159	38.8686	0.103882				G30143	413.028	374.159	38.8686	0.103882				G21907	4.05239	2.96947	1.08292	0.364685
G19807	412.605	369.652	42.9527	0.116198				G19807	412.605	369.652	42.9527	0.116198				G15049	4.05134	2.9784	1.07294	0.36024
G1979	411.477	362.045	49.4312	0.136533				G1979	411.477	362.045	49.4312	0.136533				G30260	4.04849	1.76663	2.28185	1.29164
G6004	411.452	376.645	34.8071	0.0924136				G6004	411.452	376.645	34.8071	0.0924136				G21302	4.03875	1.96731	2.07144	1.05293
G36598	410.958	387.117	23.8406	0.061585				G36598	410.958	387.117	23.8406	0.061585				G3313	4.03227	2.88795	1.14432	0.396239
G2677	406.676	338.081	68.5944	0.202893				G2677	406.676	338.081	68.5944	0.202893				G35000	4.01457	1.70419	2.31038	1.3557
G24409	406.494	390.458	16.0358	0.0410691				G24409	406.494	390.458	16.0358	0.0410691				G24716	3.99801	2.85189	1.14612	0.401882
G1204	406.034	169.313	236.721	1.39812				G1204	406.034	169.313	236.721	1.39812				G16179	3.99474	2.82998	1.16476	0.411578
G11478	405.613	354.083	51.5303	0.145532				G11478	405.613	354.083	51.5303	0.145532				G13222	3.99238	2.7606	1.23177	0.446196
G5235	405.323	378.218	27.105	0.0716649				G5235	405.323	378.218	27.105	0.0716649				G31227	3.9878	1.90376	2.08403	1.09469
G12656	404.797	317.759	87.0377	0.273911				G12656	404.797	317.759	87.0377	0.273911				G28599	3.9851	2.91294	1.07216	0.368069
G7293	403.978	343.923	60.0545	0.174616				G7293	403.978	343.923	60.0545	0.174616				G3425	3.98151	1.90857	2.07294	1.08612
G15964	403.171	308.596	94.5742	0.306466				G15964	403.171	308.596	94.5742	0.306466				G26756	3.97783	1.8683	2.10953	1.12912
G24085	403.009	246.744	156.264	0.633305				G24085	403.009	246.744	156.264	0.633305				G3086	3.96527	2.85275	1.11252	0.389983
G36569	400.946	396.743	4.20261	0.0105928				G36569	400.946	396.743	4.20261	0.0105928				G4112	3.96523	2.39028	1.57495	0.6589
G3089	400.615	385.62	14.995	0.0388854				G3089	400.615	385.62	14.995	0.0388854				G16795	3.95461	1.87795	2.07666	1.10581
G20412	399.352	346.441	52.9108	0.152727				G20412	399.352	346.441	52.9108	0.152727				G7959	3.95133	2.87391	1.07743	0.3749
G2862	399.188	250.392	148.796	0.594254				G2862	399.188	250.392	148.796	0.594254				G21236	3.94866	2.85412	1.09455	0.383497
G10688	396.915	197.883	199.032	1.00581				G10688	396.915	197.883	199.032	1.00581				G23995	3.94705	1.86362	2.08343	1.11795
G13123	396.566	265.86	130.706	0.491635				G13123	396.566	265.86	130.706	0.491635				G19744	3.94697	1.79863	2.14834	1.19443
G14227	395.936	380.779	15.1571	0.0398055				G14227	395.936	380.779	15.1571	0.0398055				G22198	3.93951	1.85495	2.08456	1.12379
G36142	393.36	212.901	180.459	0.847621				G36142	393.36	212.901	180.459	0.847621				G8733	3.93524	1.86626	2.06897	1.10862
G5292	391.751	232.036	159.715	0.688318				G5292	391.751	232.036	159.715	0.688318				G21269	3.93103	1.84389	2.08714	1.13192
G10604	391.425	357.573	33.8512	0.0946691				G10604	391.425	357.573	33.8512	0.0946691				G28838	3.92365	1.68809	2.23556	1.32432
G22402	390.413	201.471	188.942	0.93781				G22402	390.413	201.471	188.942	0.93781				G16225	3.91943	1.82961	2.08982	1.14222
G34751	389.726	105.805	283.921	2.68342				G34751	389.726	105.805	283.921	2.68342				G29127	3.9142	1.66487	2.24933	1.35105
G5216	389.646	360.851	28.7955	0.0797988				G5216	389.646	360.851	28.7955	0.0797988				G11236	3.91202	1.83701	2.07501	1.12956
G33773	388.037	193.641	194.396	1.0039				G33773	388.037	193.641	194.396	1.0039				G28462	3.90966	1.83224	2.07743	1.13382
G26652	387.14	148.442	238.698	1.60802				G26652	387.14	148.442	238.698	1.60802				G14476	3.90698	1.82406	2.08292	1.14191
G29168	386.759	173.232	213.527	1.23261				G29168	386.759	173.232	213.527	1.23261				G22199	3.90179	1.82512	2.07666	1.13782
G21712	386.202	347.742	38.4604	0.1106				G21712	386.202	347.742	38.4604	0.1106				G11977	3.89821	1.75983	2.13838	1.2151
G11875	385.944	217.197	168.747	0.776929				G11875	385.944	217.197	168.747	0.776929				G6252	3.89207	1.82217	2.0699	1.13595
G6557	385.478	282.886	102.592	0.362661				G6557	385.478	282.886	102.592	0.362661				G10609	3.8902	1.78067	2.10953	1.18468
G16758	384.219	320.562	63.6564	0.198577				G16758	384.219	320.562	63.6564	0.198577				G33529	3.88941	1.68795	2.20146	1.30422
G14595	383.086	286.237	96.8491	0.338353				G14595	383.086	286.237	96.8491	0.338353				G10177	3.88273	1.77116	2.11157	1.1922
G29037	381.401	354.83	26.5715	0.0748852				G29037	381.401	354.83	26.5715	0.0748852				G30148	3.87996	2.62559	1.25437	0.477748
G2894	380.193	351.724	28.4689	0.080941				G2894	380.193	351.724	28.4689	0.080941				G27252	3.86644	1.66596	2.20049	1.32086
G3431	379.252	341.849	37.4034	0.109415				G3431	379.252	341.849	37.4034	0.109415				G29886	3.86635	2.78084	1.08551	0.390353
G872	379.234	287.771	91.4635	0.317835				G872	379.234	287.771	91.4635	0.317835				G23338	3.86471	1.71595	2.14876	1.25223
G16766	378.859	345.937	32.9221	0.0951679				G16766	378.859	345.937	32.9221	0.0951679				G568	3.86344	2.78614	1.0773	0.386664
G15121	377.02	193.371	183.648	0.949718				G15121	377.02	193.371	183.648	0.949718				G29836	3.85874	1.77471	2.08403	1.17429
G21706	376.082	201.484	174.598	0.866559				G21706	376.082	201.484	174.598	0.866559				G14207	3.85302	1.76519	2.08783	1.18278
G25882	374.733	120.878	253.855	2.1001				G25882	374.733	120.878	253.855	2.1001				G34075	3.84465	2.75483	1.08982	0.395603
G18353	374.57	217.277	157.293	0.723925				G18353	374.57	217.277	157.293	0.723925				G32507	3.82513	2.7477	1.07743	0.39212
G35874	371.461	338.417	33.0437	0.0976418				G35874	371.461	338.417	33.0437	0.0976418				G28970	3.8242	2.7488	1.07541	0.391229
G22116	371.41	283.821	87.5885	0.308605				G22116	371.41	283.821	87.5885	0.308605				G32022	3.81165	1.71973	2.09192	1.21643
G461	371.14	272.279	98.8615	0.363089				G461	371.14	272.279	98.8615	0.363089				G17056	3.81142	1.64558	2.16584	1.31616
G31304	370.804	327.512	43.292	0.132184				G31304	370.804	327.512	43.292	0.132184				G21939	3.80562	2.55686	1.24876	0.488397
G613	370.519	155.122	215.397	1.38856				G613	370.519	155.122	215.397	1.38856				G19402	3.80461	2.40928	1.39534	0.579152
G11738	370.433	151.167	219.266	1.45049				G11738	370.433	151.167	219.266	1.45049				G1740	3.80354	2.71571	1.08783	0.400571
G25810	370.304	323.866	46.4379	0.143386				G25810	370.304	323.866	46.4379	0.143386				G1771	3.80212	1.70987	2.09225	1.22363
G814	369.957	285.294	84.6636	0.29676				G814	369.957	285.294	84.6636	0.29676				G15057	3.79577	1.61561	2.18016	1.34943
G29366	368.61	250.931	117.679	0.468968				G29366	368.61	250.931	117.679	0.468968				G32614	3.79395	1.63909	2.15486	1.31466
G34672	367.338	211.503	155.835	0.736795				G34672	367.338	211.503	155.835	0.736795				G14308	3.79137	1.68637	2.105	1.24824
G4851	366.941	153.657	213.284	1.38805				G4851	366.941	153.657	213.284	1.38805				G25840	3.78505	1.69777	2.08728	1.22942
G11246	366.411	320.593	45.8171	0.142913				G11246	366.411	320.593	45.8171	0.142913				G31486	3.76662	1.68975	2.07688	1.22911
G31170	366.13	321.199	44.9318	0.139888				G31170	366.13	321.199	44.9318	0.139888				G22644	3.76639	1.6063	2.16009	1.34476
G19848	366.114	327.985	38.1283	0.11625				G19848	366.114	327.985	38.1283	0.11625				G27891	3.76203	2.56478	1.19725	0.466805
G34279	365.946	346.834	19.1124	0.0551053				G34279	365.946	346.834	19.1124	0.0551053				G6238	3.76081	2.6854	1.07541	0.400464
G11092	365.123	251.614	113.509	0.451123				G11092	365.123	251.614	113.509	0.451123				G17986	3.7572	1.66992	2.08728	1.24993
G24402	365.009	243.334	121.676	0.500037				G24402	365.009	243.334	121.676	0.500037				G26449	3.75574	1.51655	2.23919	1.4765
G33020	363.678	358.743	4.93493	0.0137562				G33020	363.678	358.743	4.93493	0.0137562				G7739	3.75105	2.43112	1.31992	0.542927
G34457	362.393	331.871	30.5222	0.0919702				G34457	362.393	331.871	30.5222	0.0919702				G14209	3.7503	1.67489	2.07541	1.23913
G36587	361.677	349.813	11.8637	0.0339144				G36587	361.677	349.813	11.8637	0.0339144				G23007	3.74952	1.41372	2.3358	1.65224
G24932	361.498	312.086	49.4111	0.158325				G24932	361.498	312.086	49.4111	0.158325				G17146	3.74791	1.65336	2.09455	1.26684
G31176	361.33	335.582	25.7473	0.0767243				G31176	361.33	335.582	25.7473	0.0767243				G6283	3.74739	1.66428	2.08311	1.25166
G11841	360.156	338.085	22.0712	0.0652831				G11841	360.156	338.085	22.0712	0.0652831				G13174	3.7471	1.65938	2.08772	1.25813
G21684	359.717	284.225	75.4923	0.265607				G21684	359.717	284.225	75.4923	0.265607				G10345	3.73662	1.6537	2.08292	1.25955
G9794	359.628	323.995	35.6325	0.109979				G9794	359.628	323.995	35.6325	0.109979				G15501	3.73659	2.65316	1.08344	0.408357
G14108	359.565	277.708	81.8574	0.294761				G14108	359.565	277.708	81.8574	0.294761				G2652	3.73299	1.59127	2.14172	1.34592
G15761	359.554	336.719	22.835	0.0678163				G15761	359.554	336.719	22.835	0.0678163				G1281	3.73029	1.65342	2.07688	1.25611
G35256	359.539	338.972	20.567	0.0606744				G35256	359.539	338.972	20.567	0.0606744				G35884	3.72493	1.61182	2.11311	1.31101
G20227	359.357	333.506	25.8511	0.0775131				G20227	359.357	333.506	25.8511	0.0775131				G8159	3.71867	1.63316	2.08551	1.27698
G32908	358.448	180.392	178.056	0.98705				G32908	358.448	180.392	178.056	0.98705				G29112	3.71413	1.63121	2.08292	1.27692
G10276	358.223	272.18	86.0431	0.316126				G10276	358.223	272.18	86.0431	0.316126				G20326	3.70923	1.62631	2.08292	1.28076
G24084	357.569	252.769	104.8	0.414608				G24084	357.569	252.769	104.8	0.414608				G3562	3.70334	2.59198	1.11136	0.428766
G14554	357.27	104.351	252.919	2.42373				G14554	357.27	104.351	252.919	2.42373				G14349	3.70132	1.61821	2.08311	1.28729
G3322	357.225	300.759	56.4661	0.187745				G3322	357.225	300.759	56.4661	0.187745				G17030	3.69148	2.5206	1.17088	0.464527
G12418	356.984	304.184	52.7998	0.173579				G12418	356.984	304.184	52.7998	0.173579				G3781	3.69117	1.60661	2.08456	1.29749
G8142	356.22	336.266	19.9536	0.0593386				G8142	356.22	336.266	19.9536	0.0593386				G5548	3.68207	1.59656	2.08551	1.30625
G31609	355.083	324.307	30.7761	0.0948981				G31609	355.083	324.307	30.7761	0.0948981				G30158	3.67543	1.58815	2.08728	1.31428
G35769	354.991	252.572	102.419	0.405502				G35769	354.991	252.572	102.419	0.405502				G32067	3.67297	1.58315	2.08982	1.32004
G2246	354.837	321.765	33.0717	0.102782				G2246	354.837	321.765	33.0717	0.102782				G14415	3.67101	1.58809	2.08292	1.31159
G9378	354.816	332.76	22.0566	0.066284				G9378	354.816	332.76	22.0566	0.066284				G17446	3.66628	1.51471	2.15157	1.42045
G20386	354.641	187.007	167.634	0.896407				G20386	354.641	187.007	167.634	0.896407				G12905	3.66283	1.5829	2.07994	1.31401
G26439	353.92	287.041	66.8793	0.232996				G26439	353.92	287.041	66.8793	0.232996				G31546	3.66125	1.38226	2.27898	1.64873
G12874	353.896	282.945	70.9511	0.25076				G12874	353.896	282.945	70.9511	0.25076				G10364	3.66029	1.58813	2.07216	1.30478
G24342	353.544	344.962	8.58239	0.0248793				G24342	353.544	344.962	8.58239	0.0248793				G33845	3.6571	2.58416	1.07294	0.415199
G34466	353.32	318.373	34.9472	0.109768				G34466	353.32	318.373	34.9472	0.109768				G26384	3.65638	1.57087	2.08551	1.32761
G28436	352.199	339.049	13.1497	0.0387841				G28436	352.199	339.049	13.1497	0.0387841				G14279	3.65498	2.46457	1.19041	0.48301
G13594	351.916	319.088	32.8276	0.102879				G13594	351.916	319.088	32.8276	0.102879				G21149	3.64786	1.5757	2.07216	1.31508
G14379	351.797	330.354	21.443	0.064909				G14379	351.797	330.354	21.443	0.064909				G32823	3.64022	1.5504	2.08982	1.34792
G30886	351.785	185.49	166.294	0.896511				G30886	351.785	185.49	166.294	0.896511				G14295	3.63596	1.54868	2.08728	1.34778
G35393	350.835	259.496	91.3384	0.351983				G35393	350.835	259.496	91.3384	0.351983				G14841	3.63559	2.5554	1.0802	0.422711
G30072	350.114	260.924	89.19	0.341823				G30072	350.114	260.924	89.19	0.341823				G19124	3.63253	1.55752	2.07501	1.33226
G21483	349.722	219.01	130.713	0.596835				G21483	349.722	219.01	130.713	0.596835				G12111	3.62503	2.55359	1.07144	0.419581
G28858	349.413	197.818	151.594	0.76633				G28858	349.413	197.818	151.594	0.76633				G20297	3.61907	1.54691	2.07216	1.33955
G657	349.3	169.114	180.185	1.06546				G657	349.3	169.114	180.185	1.06546				G17822	3.6128	1.53778	2.07501	1.34935
G13271	348.802	331.413	17.3894	0.0524705				G13271	348.802	331.413	17.3894	0.0524705				G3602	3.61272	2.52962	1.08311	0.428172
G35565	347.657	329.181	18.476	0.0561271				G35565	347.657	329.181	18.476	0.0561271				G14798	3.60799	2.53297	1.07501	0.424408
G23195	347.253	246.307	100.946	0.409838				G23195	347.253	246.307	100.946	0.409838				G21662	3.60327	2.52931	1.07396	0.424606
G17087	347.058	295.767	51.2915	0.173419				G17087	347.058	295.767	51.2915	0.173419				G26663	3.58697	1.43211	2.15486	1.50467
G27297	346.98	206.849	140.13	0.677451				G27297	346.98	206.849	140.13	0.677451				G8242	3.58547	2.49494	1.09053	0.437099
G25467	345.555	217.04	128.515	0.592124				G25467	345.555	217.04	128.515	0.592124				G26265	3.58122	1.42662	2.1546	1.51028
G18103	345.006	332.853	12.1529	0.0365112				G18103	345.006	332.853	12.1529	0.0365112				G29283	3.57816	1.49524	2.08292	1.39303
G6044	344.901	318.284	26.6172	0.0836274				G6044	344.901	318.284	26.6172	0.0836274				G17412	3.57784	1.5064	2.07144	1.37509
G20207	344.356	238.484	105.872	0.443937				G20207	344.356	238.484	105.872	0.443937				G21243	3.5726	2.45949	1.11311	0.452578
G12603	343.874	251.166	92.7076	0.369108				G12603	343.874	251.166	92.7076	0.369108				G24910	3.5719	1.49249	2.0794	1.39324
G24359	343.375	189.157	154.218	0.815292				G24359	343.375	189.157	154.218	0.815292				G33893	3.57088	2.48796	1.08292	0.435264
G15168	343.106	312.668	30.438	0.0973494				G15168	343.106	312.668	30.438	0.0973494				G9421	3.56139	2.39826	1.16313	0.484988
G28919	342.921	217.961	124.961	0.573319				G28919	342.921	217.961	124.961	0.573319				G30061	3.55657	1.41069	2.14588	1.52115
G11552	342.682	298.467	44.2141	0.148137				G11552	342.682	298.467	44.2141	0.148137				G2933	3.55447	1.47759	2.07688	1.40558
G7382	342.177	275.832	66.3444	0.240524				G7382	342.177	275.832	66.3444	0.240524				G4639	3.55274	2.40743	1.14531	0.47574
G33212	342.058	287.086	54.9728	0.191486				G33212	342.058	287.086	54.9728	0.191486				G21097	3.54649	1.46357	2.08292	1.42318
G24722	341.839	75.2421	266.597	3.54319				G24722	341.839	75.2421	266.597	3.54319				G31414	3.54643	1.39037	2.15606	1.55071
G35046	341.65	280.087	61.5627	0.219798				G35046	341.65	280.087	61.5627	0.219798				G915	3.54314	2.456	1.08714	0.442647
G26018	341.148	200.61	140.538	0.700552				G26018	341.148	200.61	140.538	0.700552				G36858	3.54102	2.36976	1.17126	0.494254
G33409	340.923	318.856	22.067	0.0692069				G33409	340.923	318.856	22.067	0.0692069				G8179	3.53691	1.46701	2.0699	1.41097
G7258	340.732	337.456	3.27558	0.00970667				G7258	340.732	337.456	3.27558	0.00970667				G4213	3.5353	2.27945	1.25585	0.550942
G36580	339.943	113.579	226.365	1.99302				G36580	339.943	113.579	226.365	1.99302				G17488	3.53413	2.36689	1.16725	0.493158
G31358	339.796	256.569	83.2267	0.324383				G31358	339.796	256.569	83.2267	0.324383				G16337	3.53181	1.45438	2.07743	1.42839
G10277	338.911	171.833	167.078	0.972331				G10277	338.911	171.833	167.078	0.972331				G664	3.5264	1.36494	2.16146	1.58356
G6693	338.334	205.082	133.252	0.649748				G6693	338.334	205.082	133.252	0.649748				G2823	3.52402	1.4342	2.08982	1.45713
G8823	338.294	137.357	200.938	1.46289				G8823	338.294	137.357	200.938	1.46289				G17241	3.52332	1.43875	2.08456	1.44887
G4559	337.717	291.522	46.1946	0.15846				G4559	337.717	291.522	46.1946	0.15846				G8855	3.52113	2.19048	1.33066	0.607474
G8920	337.492	168.667	168.825	1.00094				G8920	337.492	168.667	168.825	1.00094				G29243	3.51858	1.42876	2.08982	1.46268
G2040	337.398	224.919	112.479	0.500085				G2040	337.398	224.919	112.479	0.500085				G2489	3.51728	1.43821	2.07907	1.44559
G32796	337.32	323.709	13.6113	0.0420481				G32796	337.32	323.709	13.6113	0.0420481				G29018	3.51646	2.4443	1.07216	0.438637
G5262	337.206	315.064	22.1411	0.0702748				G5262	337.206	315.064	22.1411	0.0702748				G33381	3.50788	2.23333	1.27455	0.570696
G18336	335.789	331.965	3.82315	0.0115167				G18336	335.789	331.965	3.82315	0.0115167				G33779	3.50763	2.43033	1.0773	0.443273
G8475	335.648	307.216	28.4313	0.0925449				G8475	335.648	307.216	28.4313	0.0925449				G23863	3.5065	1.33548	2.17102	1.62564
G16924	335.558	202.602	132.956	0.656239				G16924	335.558	202.602	132.956	0.656239				G34546	3.50597	2.36484	1.14113	0.482542
G28751	335.472	297.584	37.8877	0.127318				G28751	335.472	297.584	37.8877	0.127318				G25872	3.50131	1.4182	2.08311	1.46884
G3018	335.455	329.908	5.54681	0.0168132				G3018	335.455	329.908	5.54681	0.0168132				G2852	3.48748	1.41005	2.07743	1.4733
G8984	335.019	282.365	52.6537	0.186474				G8984	335.019	282.365	52.6537	0.186474				G26212	3.48625	2.08871	1.39754	0.669091
G29001	334.434	241.333	93.1018	0.385782				G29001	334.434	241.333	93.1018	0.385782				G25254	3.48332	2.40589	1.07743	0.447829
G8884	334.329	288.451	45.8778	0.159049				G8884	334.329	288.451	45.8778	0.159049				G20283	3.48163	2.36253	1.1191	0.473688
G4282	333.537	292.023	41.5143	0.142161				G4282	333.537	292.023	41.5143	0.142161				G32774	3.48138	1.36396	2.11741	1.5524
G29816	330.873	134.244	196.629	1.46472				G29816	330.873	134.244	196.629	1.46472				G32608	3.47852	1.38818	2.09034	1.50581
G3880	330.746	216.29	114.456	0.529178				G3880	330.746	216.29	114.456	0.529178				G34136	3.47787	1.40044	2.07743	1.48341
G27952	330.141	197.065	133.076	0.67529				G27952	330.141	197.065	133.076	0.67529				G18812	3.47633	1.40417	2.07216	1.47571
G34388	329.817	282.877	46.94	0.165938				G34388	329.817	282.877	46.94	0.165938				G696	3.4747	2.39178	1.08292	0.452767
G11466	329.711	288.298	41.4129	0.143646				G11466	329.711	288.298	41.4129	0.143646				G24549	3.46963	2.34137	1.12826	0.481882
G28686	329.573	212.762	116.811	0.549022				G28686	329.573	212.762	116.811	0.549022				G3954	3.46657	1.37675	2.08982	1.51794
G30581	329.514	286.675	42.839	0.149434				G30581	329.514	286.675	42.839	0.149434				G18887	3.46624	1.39186	2.07438	1.49037
G19442	329.382	302.099	27.2827	0.0903104				G19442	329.382	302.099	27.2827	0.0903104				G95	3.46443	1.37461	2.08982	1.5203
G24344	329.366	262.601	66.7652	0.254246				G24344	329.366	262.601	66.7652	0.254246				G21667	3.44948	2.37206	1.07743	0.454217
G6142	328.289	269.757	58.5324	0.216982				G6142	328.289	269.757	58.5324	0.216982				G14517	3.44856	1.36545	2.08311	1.52559
G32003	328.197	219.082	109.115	0.498057				G32003	328.197	219.082	109.115	0.498057				G4384	3.44751	1.37008	2.07743	1.51628
G11681	327.893	232.197	95.6959	0.412133				G11681	327.893	232.197	95.6959	0.412133				G24234	3.44375	1.35393	2.08982	1.54352
G22301	327.798	298.849	28.9491	0.0968686				G22301	327.798	298.849	28.9491	0.0968686				G29561	3.44328	1.3488	2.09448	1.55285
G3112	327.705	261.733	65.972	0.252058				G3112	327.705	261.733	65.972	0.252058				G24824	3.44056	1.35764	2.08292	1.53422
G10930	327.364	138.225	189.139	1.36835				G10930	327.364	138.225	189.139	1.36835				G11851	3.43901	2.35609	1.08292	0.459626
G28561	326.477	146.064	180.413	1.23516				G28561	326.477	146.064	180.413	1.23516				G1499	3.43659	2.08315	1.35345	0.649713
G27224	326.211	271.866	54.3448	0.199896				G27224	326.211	271.866	54.3448	0.199896				G21904	3.42817	1.29022	2.13795	1.65704
G27657	325.812	224.219	101.592	0.453094				G27657	325.812	224.219	101.592	0.453094				G32878	3.4231	1.34809	2.07501	1.53923
G22665	325.699	267.024	58.6755	0.219739				G22665	325.699	267.024	58.6755	0.219739				G16966	3.42074	1.32849	2.09225	1.57491
G21473	325.542	191.929	133.613	0.696158				G21473	325.542	191.929	133.613	0.696158				G18383	3.42014	1.33286	2.08728	1.56601
G11423	324.543	307.98	16.563	0.0537795				G11423	324.543	307.98	16.563	0.0537795				G32826	3.41567	1.33275	2.08292	1.56288
G31502	324.316	168.386	155.931	0.926033				G31502	324.316	168.386	155.931	0.926033				G6122	3.41495	2.29753	1.11741	0.486353
G6882	324.126	227.737	96.3884	0.423244				G6882	324.126	227.737	96.3884	0.423244				G28967	3.41436	1.33706	2.0773	1.55364
G23172	323.903	234.455	89.4477	0.381514				G23172	323.903	234.455	89.4477	0.381514				G4465	3.41226	1.32915	2.08311	1.56725
G1357	322.363	305.772	16.5911	0.0542596				G1357	322.363	305.772	16.5911	0.0542596				G17042	3.40766	1.32455	2.08311	1.57269
G14565	322.05	142.179	179.871	1.2651				G14565	322.05	142.179	179.871	1.2651				G31383	3.40597	1.32194	2.08403	1.5765
G9505	321.445	288.27	33.1757	0.115086				G9505	321.445	288.27	33.1757	0.115086				G29869	3.40579	2.31597	1.08982	0.470568
G9752	321.365	286.258	35.1078	0.122644				G9752	321.365	286.258	35.1078	0.122644				G5599	3.39864	1.32121	2.07743	1.57237
G16193	321.352	267.194	54.1576	0.20269				G16193	321.352	267.194	54.1576	0.20269				G2373	3.3926	2.2352	1.1574	0.517804
G18751	320.832	275.988	44.8444	0.162487				G18751	320.832	275.988	44.8444	0.162487				G24887	3.38794	1.29339	2.09455	1.61942
G33396	320.208	267.443	52.7649	0.197294				G33396	320.208	267.443	52.7649	0.197294				G15112	3.37992	2.11943	1.26049	0.59473
G29340	319.42	284.09	35.3295	0.12436				G29340	319.42	284.09	35.3295	0.12436				G4005	3.37849	2.30951	1.06897	0.462857
G20363	319.4	136.147	183.253	1.34599				G20363	319.4	136.147	183.253	1.34599				G21591	3.37222	1.28671	2.08551	1.6208
G5763	318.764	264.176	54.5882	0.206636				G5763	318.764	264.176	54.5882	0.206636				G35057	3.36929	1.28637	2.08292	1.61923
G32591	318.266	237.902	80.364	0.337803				G32591	318.266	237.902	80.364	0.337803				G3319	3.36685	2.2723	1.09455	0.48169
G34547	317.982	194.422	123.56	0.635524				G34547	317.982	194.422	123.56	0.635524				G26059	3.35621	2.2054	1.15082	0.521819
G1181	317.772	240.034	77.7378	0.323861				G1181	317.772	240.034	77.7378	0.323861				G28594	3.34288	2.15444	1.18843	0.55162
G34932	317.701	284.976	32.7244	0.114832				G34932	317.701	284.976	32.7244	0.114832				G18139	3.33478	1.25186	2.08292	1.66386
G35106	317.422	219.749	97.6731	0.444477				G35106	317.422	219.749	97.6731	0.444477				G36811	3.33117	1.24713	2.08403	1.67106
G22979	316.746	293.594	23.1526	0.0788593				G22979	316.746	293.594	23.1526	0.0788593				G4990	3.32784	1.24921	2.07863	1.66396
G8167	316.061	289.541	26.5202	0.0915942				G8167	316.061	289.541	26.5202	0.0915942				G26918	3.3256	2.20946	1.11614	0.505165
G3249	316.051	178.295	137.756	0.772628				G3249	316.051	178.295	137.756	0.772628				G22066	3.32507	1.24777	2.0773	1.66481
G25777	315.894	132.04	183.855	1.39242				G25777	315.894	132.04	183.855	1.39242				G19157	3.32426	1.24083	2.08343	1.67907
G14408	315.335	179.058	136.277	0.761074				G14408	315.335	179.058	136.277	0.761074				G7386	3.32338	2.24595	1.07743	0.47972
G8124	315.138	75.3655	239.773	3.18146				G8124	315.138	75.3655	239.773	3.18146				G1436	3.32213	1.23485	2.08728	1.69031
G387	314.337	291.93	22.4063	0.0767521				G387	314.337	291.93	22.4063	0.0767521				G19888	3.32023	1.24029	2.07994	1.67698
G27189	314.263	297.854	16.4088	0.0550901				G27189	314.263	297.854	16.4088	0.0550901				G10970	3.31935	1.24192	2.07743	1.67275
G16942	314.251	194.316	119.935	0.617214				G16942	314.251	194.316	119.935	0.617214				G19615	3.31711	1.23692	2.0802	1.68176
G24438	314.134	279.369	34.7647	0.12444				G24438	314.134	279.369	34.7647	0.12444				G23860	3.31661	1.23974	2.07688	1.67526
G31447	313.919	261.536	52.383	0.20029				G31447	313.919	261.536	52.383	0.20029				G20339	3.31	1.23856	2.07144	1.67246
G3399	313.535	293.25	20.2845	0.0691713				G3399	313.535	293.25	20.2845	0.0691713				G27320	3.30999	2.23783	1.07216	0.479107
G7155	312.364	94.7161	217.648	2.2979				G7155	312.364	94.7161	217.648	2.2979				G31695	3.30952	1.23046	2.07907	1.68967
G4263	312.196	289.447	22.7497	0.078597				G4263	312.196	289.447	22.7497	0.078597				G36114	3.30343	2.14319	1.16024	0.541362
G25364	311.768	261.87	49.898	0.190545				G25364	311.768	261.87	49.898	0.190545				G34748	3.29742	2.22752	1.0699	0.480312
G5111	311.693	135.072	176.621	1.3076				G5111	311.693	135.072	176.621	1.3076				G29060	3.29443	2.21151	1.08292	0.489674
G964	310.788	159.743	151.044	0.945542				G964	310.788	159.743	151.044	0.945542				G21114	3.29043	1.21103	2.0794	1.71706
G29069	309.1	209.48	99.62	0.475559				G29069	309.1	209.48	99.62	0.475559				G24807	3.28738	2.20395	1.08343	0.491585
G2031	308.452	153.83	154.622	1.00515				G2031	308.452	153.83	154.622	1.00515				G22491	3.28667	1.20263	2.08403	1.73289
G30092	308.337	296.816	11.5206	0.0388139				G30092	308.337	296.816	11.5206	0.0388139				G5712	3.28271	1.19979	2.08292	1.73607
G5621	308.202	119.627	188.575	1.57635				G5621	308.202	119.627	188.575	1.57635				G28162	3.28112	2.20818	1.07294	0.485893
G7963	307.948	294.418	13.5297	0.0459542				G7963	307.948	294.418	13.5297	0.0459542				G22312	3.27616	2.18582	1.09034	0.498822
G6099	307.31	279.762	27.5488	0.0984723				G6099	307.31	279.762	27.5488	0.0984723				G11075	3.27427	1.20133	2.07294	1.72553
G31363	306.843	254.929	51.9143	0.203642				G31363	306.843	254.929	51.9143	0.203642				G17795	3.27123	1.19129	2.07994	1.74595
G6137	306.722	162.763	143.959	0.884472				G6137	306.722	162.763	143.959	0.884472				G32531	3.26438	2.00943	1.25495	0.624532
G12992	305.92	166.391	139.529	0.838562				G12992	305.92	166.391	139.529	0.838562				G846	3.2638	1.1844	2.0794	1.75566
G7418	305.774	157.342	148.432	0.943372				G7418	305.774	157.342	148.432	0.943372				G16210	3.25836	1.17064	2.08772	1.7834
G24443	305.326	253.274	52.0527	0.20552				G24443	305.326	253.274	52.0527	0.20552				G17824	3.25724	1.1843	2.07294	1.75036
G12478	305.028	175.608	129.421	0.736987				G12478	305.028	175.608	129.421	0.736987				G5579	3.25451	1.16679	2.08772	1.78929
G10493	305.016	174.794	130.221	0.744996				G10493	305.016	174.794	130.221	0.744996				G25297	3.24928	1.16636	2.08292	1.78584
G22123	304.862	69.1347	235.727	3.40967				G22123	304.862	69.1347	235.727	3.40967				G10316	3.2486	2.11702	1.13158	0.534515
G17926	304.733	245.833	58.8995	0.239591				G17926	304.733	245.833	58.8995	0.239591				G20130	3.24853	2.17187	1.07666	0.49573
G20251	304.711	278.74	25.9709	0.0931722				G20251	304.711	278.74	25.9709	0.0931722				G19371	3.24034	2.06182	1.17851	0.571588
G16283	302.11	175.413	126.697	0.722279				G16283	302.11	175.413	126.697	0.722279				G33057	3.23754	1.15847	2.07907	1.79467
G24527	301.971	167.1	134.871	0.807128				G24527	301.971	167.1	134.871	0.807128				G31280	3.23732	2.06845	1.16886	0.565089
G23935	301.92	276.508	25.4128	0.0919065				G23935	301.92	276.508	25.4128	0.0919065				G21551	3.2359	1.99253	1.24336	0.624011
G15367	301.671	127.332	174.338	1.36916				G15367	301.671	127.332	174.338	1.36916				G12245	3.23547	1.15606	2.0794	1.79869
G10095	301.35	223.484	77.8657	0.348417				G10095	301.35	223.484	77.8657	0.348417				G34235	3.22931	1.15637	2.07294	1.79263
G24906	301.34	269.631	31.709	0.117601				G24906	301.34	269.631	31.709	0.117601				G47	3.22516	2.14975	1.07541	0.500249
G29802	301.329	196.963	104.366	0.529875				G29802	301.329	196.963	104.366	0.529875				G27215	3.2223	1.14834	2.07396	1.80605
G15879	301.133	242.128	59.0044	0.243691				G15879	301.133	242.128	59.0044	0.243691				G18419	3.20499	2.12958	1.07541	0.504986
G13439	300.608	213.981	86.6273	0.404836				G13439	300.608	213.981	86.6273	0.404836				G13458	3.19202	2.12211	1.0699	0.504169
G20580	300.437	295.72	4.71655	0.0159494				G20580	300.437	295.72	4.71655	0.0159494				G16896	3.18595	2.10303	1.08292	0.514933
G25316	300.372	250.154	50.2183	0.20075				G25316	300.372	250.154	50.2183	0.20075				G31676	3.17867	1.90098	1.27769	0.672123
G19238	299.23	286.802	12.4283	0.0433342				G19238	299.23	286.802	12.4283	0.0433342				G31550	3.17824	2.10386	1.07438	0.510671
G30451	298.83	280.761	18.0693	0.0643584				G30451	298.83	280.761	18.0693	0.0643584				G34874	3.17456	1.08728	2.08728	1.91973
G14363	297.871	145.875	151.996	1.04196				G14363	297.871	145.875	151.996	1.04196				G31857	3.1717	1.96784	1.20386	0.611767
G8414	297.642	267.013	30.6285	0.114708				G8414	297.642	267.013	30.6285	0.114708				G19096	3.16228	1.96047	1.20181	0.613021
G12949	297.259	172.646	124.613	0.721783				G12949	297.259	172.646	124.613	0.721783				G20632	3.15727	1.07863	2.07863	1.9271
G8053	297.156	180.966	116.19	0.642053				G8053	297.156	180.966	116.19	0.642053				G36489	3.15082	1.07541	2.07541	1.92988
G19438	296.979	263.683	33.2957	0.126272				G19438	296.979	263.683	33.2957	0.126272				G26357	3.13656	1.97418	1.16239	0.588796
G3527	296.807	269.059	27.7481	0.10313				G3527	296.807	269.059	27.7481	0.10313				G22997	3.11024	1.9523	1.15793	0.593113
G28170	296.34	196.234	100.106	0.510135				G28170	296.34	196.234	100.106	0.510135				G33435	3.09649	1.96491	1.13158	0.575894
G11213	295.999	279.16	16.8392	0.0603212				G11213	295.999	279.16	16.8392	0.0603212				G6374	3.09425	2.01884	1.07541	0.532687
G23386	295.579	243.665	51.9144	0.213057				G23386	295.579	243.665	51.9144	0.213057				G8284	3.09145	1.93157	1.15988	0.600483
G4204	295.512	172.831	122.681	0.709835				G4204	295.512	172.831	122.681	0.709835				G32393	3.08324	1.9927	1.09053	0.547264
G25391	294.389	268.979	25.41	0.094468				G25391	294.389	268.979	25.41	0.094468				G14563	3.07983	1.98929	1.09053	0.548202
G18357	294.353	160.415	133.938	0.834947				G18357	294.353	160.415	133.938	0.834947				G7493	3.07477	1.86702	1.20775	0.646885
G9702	294.301	243.877	50.4239	0.206759				G9702	294.301	243.877	50.4239	0.206759				G6933	3.0599	1.8454	1.2145	0.658121
G32688	294.208	201.609	92.5991	0.459301				G32688	294.208	201.609	92.5991	0.459301				G527	3.05973	1.97662	1.08311	0.54796
G33577	294.078	271.323	22.7553	0.083868				G33577	294.078	271.323	22.7553	0.083868				G7404	3.04941	1.86662	1.18279	0.633651
G35302	293.631	273.26	20.3715	0.0745501				G35302	293.631	273.26	20.3715	0.0745501				G26861	3.04882	1.93746	1.11136	0.573614
G24497	293.623	290.124	3.49937	0.0120617				G24497	293.623	290.124	3.49937	0.0120617				G32580	3.04712	1.96848	1.07863	0.547951
G15959	293.524	267.02	26.5045	0.0992603				G15959	293.524	267.02	26.5045	0.0992603				G20871	3.01105	1.8417	1.16935	0.63493
G14788	293.171	146.771	146.399	0.997464				G14788	293.171	146.771	146.399	0.997464				G9585	3.00056	1.88196	1.1186	0.594381
G7769	293.029	271.078	21.9516	0.080979				G7769	293.029	271.078	21.9516	0.080979				G22009	2.99341	1.90288	1.09053	0.573097
G33168	292.731	171.627	121.104	0.705628				G33168	292.731	171.627	121.104	0.705628				G24091	2.99196	1.87581	1.11614	0.595018
G29809	291.731	259.454	32.2772	0.124404				G29809	291.731	259.454	32.2772	0.124404				G20382	2.99031	1.89576	1.09455	0.577365
G19329	291.644	152.512	139.132	0.912269				G19329	291.644	152.512	139.132	0.912269				G16103	2.98738	1.90719	1.0802	0.566381
G9092	291.591	270.029	21.5615	0.0798488				G9092	291.591	270.029	21.5615	0.0798488				G20437	2.98235	1.85077	1.13158	0.611409
G8702	291.419	167.152	124.267	0.743442				G8702	291.419	167.152	124.267	0.743442				G24260	2.9609	1.88874	1.07216	0.567658
G3353	291.333	257.829	33.5036	0.129945				G3353	291.333	257.829	33.5036	0.129945				G33387	2.95736	1.87022	1.08714	0.581289
G35934	289.874	281.286	8.58812	0.0305316				G35934	289.874	281.286	8.58812	0.0305316				G17223	2.95504	1.8751	1.07994	0.575937
G28158	288.609	108.368	180.241	1.66324				G28158	288.609	108.368	180.241	1.66324				G1697	2.94422	1.74883	1.19539	0.683534
G7986	288.503	245.241	43.2626	0.176409				G7986	288.503	245.241	43.2626	0.176409				G32504	2.936	1.84546	1.09053	0.590928
G1727	288.207	268.426	19.7804	0.0736902				G1727	288.207	268.426	19.7804	0.0736902				G32183	2.93103	1.8536	1.07743	0.581263
G18415	287.901	148.947	138.954	0.932905				G18415	287.901	148.947	138.954	0.932905				G13428	2.9147	1.83178	1.08292	0.591184
G11527	287.832	120.231	167.601	1.394				G11527	287.832	120.231	167.601	1.394				G10703	2.90616	1.66834	1.23782	0.741945
G32478	287.671	187.14	100.531	0.537197				G32478	287.671	187.14	100.531	0.537197				G22878	2.90554	1.81099	1.09455	0.60439
G20489	287.561	270.243	17.3179	0.0640828				G20489	287.561	270.243	17.3179	0.0640828				G28961	2.90133	1.81361	1.08772	0.599753
G24787	287.465	264.858	22.6063	0.0853523				G24787	287.465	264.858	22.6063	0.0853523				G24264	2.89904	1.71898	1.18006	0.686484
G865	286.985	281.8	5.18448	0.0183977				G865	286.985	281.8	5.18448	0.0183977				G27776	2.89176	1.81446	1.0773	0.59373
G7329	286.561	262.86	23.7017	0.0901688				G7329	286.561	262.86	23.7017	0.0901688				G24502	2.89144	1.81706	1.07438	0.591272
G16710	285.093	192.122	92.9712	0.483918				G16710	285.093	192.122	92.9712	0.483918				G18796	2.88931	1.73169	1.15762	0.668494
G34725	284.381	261.761	22.6206	0.086417				G34725	284.381	261.761	22.6206	0.086417				G25097	2.88761	1.81031	1.0773	0.595092
G12645	284.283	121.523	162.76	1.33934				G12645	284.283	121.523	162.76	1.33934				G11747	2.88396	1.73114	1.15282	0.665933
G24470	283.916	269.473	14.4421	0.0535937				G24470	283.916	269.473	14.4421	0.0535937				G33853	2.87811	1.75373	1.12438	0.641138
G13971	283.911	253.28	30.6303	0.120934				G13971	283.911	253.28	30.6303	0.120934				G17024	2.87219	1.78435	1.08783	0.609652
G34262	283.492	271.599	11.8932	0.0437895				G34262	283.492	271.599	11.8932	0.0437895				G16521	2.87005	1.77971	1.09034	0.612649
G12568	283.291	179.519	103.772	0.578056				G12568	283.291	179.519	103.772	0.578056				G21304	2.86769	1.77735	1.09034	0.613462
G23551	283.15	74.2227	208.927	2.81487				G23551	283.15	74.2227	208.927	2.81487				G35785	2.83871	1.76474	1.07396	0.608565
G6047	282.708	104.065	178.643	1.71665				G6047	282.708	104.065	178.643	1.71665				G14627	2.82881	1.66362	1.16519	0.700397
G22650	282.231	272.956	9.27459	0.0339783				G22650	282.231	272.956	9.27459	0.0339783				G16046	2.82719	1.75822	1.06897	0.607986
G13509	281.331	197.992	83.3387	0.420919				G13509	281.331	197.992	83.3387	0.420919				G34178	2.81498	1.73756	1.07743	0.620083
G22399	280.85	262.981	17.8688	0.0679471				G22399	280.85	262.981	17.8688	0.0679471				G19724	2.7974	1.71746	1.07994	0.628799
G6185	280.781	101.192	179.589	1.77474				G6185	280.781	101.192	179.589	1.77474				G21081	2.78296	1.71305	1.0699	0.624559
G10066	280.576	264.839	15.7374	0.0594226				G10066	280.576	264.839	15.7374	0.0594226				G11521	2.78227	1.66975	1.11252	0.666281
G35571	280.522	242.406	38.1152	0.157237				G35571	280.522	242.406	38.1152	0.157237				G29079	2.78101	1.70599	1.07501	0.630141
G33327	279.997	183.552	96.4455	0.52544				G33327	279.997	183.552	96.4455	0.52544				G6195	2.7649	1.68146	1.08344	0.64434
G33956	279.467	241.317	38.1496	0.158089				G33956	279.467	241.317	38.1496	0.158089				G36362	2.75959	1.66977	1.08982	0.652678
G24883	279.429	219.367	60.0622	0.273797				G24883	279.429	219.367	60.0622	0.273797				G19516	2.74523	1.66231	1.08292	0.651457
G14477	278.657	82.5728	196.084	2.37468				G14477	278.657	82.5728	196.084	2.37468				G22192	2.74453	1.6671	1.07743	0.646289
G12824	278.477	93.2677	185.209	1.98578				G12824	278.477	93.2677	185.209	1.98578				G3721	2.73476	1.59638	1.13838	0.713098
G14858	278.415	240.716	37.6981	0.156608				G14858	278.415	240.716	37.6981	0.156608				G36768	2.73364	1.64382	1.08982	0.66298
G3247	278.329	256.163	22.1655	0.0865289				G3247	278.329	256.163	22.1655	0.0865289				G14360	2.72779	1.64323	1.08456	0.66002
G924	278.262	258.369	19.8931	0.0769949				G924	278.262	258.369	19.8931	0.0769949				G36058	2.72553	1.6415	1.08403	0.660393
G7246	277.941	184.116	93.824	0.509591				G7246	277.941	184.116	93.824	0.509591				G29008	2.7172	1.63428	1.08292	0.662629
G10516	277.9	263.78	14.1197	0.0535282				G10516	277.9	263.78	14.1197	0.0535282				G30646	2.7094	1.62156	1.08783	0.670855
G17039	277.892	237.241	40.651	0.171349				G17039	277.892	237.241	40.651	0.171349				G1651	2.70237	1.44741	1.25495	0.867031
G25868	277.784	197.597	80.1876	0.405814				G25868	277.784	197.597	80.1876	0.405814				G26373	2.70129	1.62266	1.07863	0.66473
G16702	277.733	212.306	65.4263	0.30817				G16702	277.733	212.306	65.4263	0.30817				G18952	2.69799	1.60345	1.09455	0.682621
G12136	277.554	255.495	22.0596	0.0863406				G12136	277.554	255.495	22.0596	0.0863406				G7592	2.68661	1.60369	1.08292	0.67527
G36601	277.364	245.511	31.8532	0.129742				G36601	277.364	245.511	31.8532	0.129742				G13501	2.67795	1.60293	1.07501	0.670654
G18075	277.186	235.713	41.4731	0.175948				G18075	277.186	235.713	41.4731	0.175948				G35624	2.67683	1.60389	1.07294	0.668959
G29534	277.149	239.435	37.7146	0.157515				G29534	277.149	239.435	37.7146	0.157515				G18394	2.65698	1.57406	1.08292	0.687979
G32016	276.632	264.984	11.6484	0.0439589				G32016	276.632	264.984	11.6484	0.0439589				G7278	2.64895	1.4838	1.16515	0.785245
G18236	276.32	178.043	98.2774	0.551988				G18236	276.32	178.043	98.2774	0.551988				G7030	2.64831	1.55777	1.09053	0.70006
G16020	276.304	258.765	17.539	0.0677796				G16020	276.304	258.765	17.539	0.0677796				G27976	2.64274	1.5549	1.08783	0.699616
G11501	275.274	160.222	115.052	0.718078				G11501	275.274	160.222	115.052	0.718078				G575	2.63174	1.5588	1.07294	0.688313
G16530	274.924	229.129	45.7947	0.199864				G16530	274.924	229.129	45.7947	0.199864				G27984	2.62521	1.54229	1.08292	0.702153
G36199	274.669	190.372	84.2968	0.4428				G36199	274.669	190.372	84.2968	0.4428				G10068	2.62269	1.54582	1.07688	0.69664
G9701	274.386	244.639	29.7461	0.121592				G9701	274.386	244.639	29.7461	0.121592				G5317	2.62175	1.55031	1.07144	0.691113
G22190	274.37	145.017	129.353	0.89198				G22190	274.37	145.017	129.353	0.89198				G8111	2.61034	1.51809	1.09225	0.719493
G36637	273.573	262.92	10.6536	0.0405204				G36637	273.573	262.92	10.6536	0.0405204				G29129	2.61024	1.52473	1.08551	0.711934
G12469	272.957	194.442	78.515	0.403797				G12469	272.957	194.442	78.515	0.403797				G10250	2.60562	1.52011	1.08551	0.714098
G27629	272.794	233.851	38.9431	0.166529				G27629	272.794	233.851	38.9431	0.166529				G27079	2.6051	1.51055	1.09455	0.7246
G2001	272.651	147.386	125.264	0.849906				G2001	272.651	147.386	125.264	0.849906				G12193	2.59721	1.51781	1.0794	0.711158
G6493	272.574	229.42	43.1536	0.188098				G6493	272.574	229.42	43.1536	0.188098				G8291	2.57956	1.51058	1.06897	0.707655
G34934	272.543	195.596	76.947	0.393397				G34934	272.543	195.596	76.947	0.393397				G29480	2.57789	1.48807	1.08982	0.73237
G28817	272.4	255.234	17.1655	0.0672538				G28817	272.4	255.234	17.1655	0.0672538				G12232	2.57755	1.48773	1.08982	0.732537
G28195	271.635	248.573	23.0612	0.0927743				G28195	271.635	248.573	23.0612	0.0927743				G11951	2.5757	1.40657	1.16913	0.83119
G3446	271.27	247.491	23.7791	0.0960804				G3446	271.27	247.491	23.7791	0.0960804				G29329	2.57303	1.38393	1.18909	0.859212
G29192	270.339	213.15	57.189	0.268304				G29192	270.339	213.15	57.189	0.268304				G3418	2.56364	1.48072	1.08292	0.731348
G15827	270.277	137.771	132.507	0.96179				G15827	270.277	137.771	132.507	0.96179				G23916	2.54977	1.46957	1.0802	0.73504
G24252	270.017	222.995	47.0224	0.210868				G24252	270.017	222.995	47.0224	0.210868				G24663	2.53819	1.46675	1.07144	0.730483
G9223	269.839	248.162	21.6773	0.0873514				G9223	269.839	248.162	21.6773	0.0873514				G10384	2.53364	1.44813	1.08551	0.749595
G21710	269.599	257.922	11.6772	0.045274				G21710	269.599	257.922	11.6772	0.045274				G25996	2.5278	1.44761	1.0802	0.746195
G31042	268.958	185.961	82.9968	0.446313				G31042	268.958	185.961	82.9968	0.446313				G8505	2.51866	1.43523	1.08343	0.754884
G18166	268.71	215.376	53.3338	0.247631				G18166	268.71	215.376	53.3338	0.247631				G6962	2.5168	1.44139	1.07541	0.74609
G2186	268.704	217.122	51.5815	0.237569				G2186	268.704	217.122	51.5815	0.237569				G35309	2.51546	1.42354	1.09192	0.767047
G5965	268.624	245.731	22.8925	0.0931608				G5965	268.624	245.731	22.8925	0.0931608				G9422	2.51439	1.44001	1.07438	0.746092
G21259	268.48	259.717	8.76316	0.0337412				G21259	268.48	259.717	8.76316	0.0337412				G19747	2.50468	1.34616	1.15852	0.860609
G32815	268.461	255.922	12.5389	0.0489951				G32815	268.461	255.922	12.5389	0.0489951				G12013	2.48363	1.40621	1.07743	0.766195
G26021	268.022	115.962	152.061	1.3113				G26021	268.022	115.962	152.061	1.3113				G10239	2.48334	1.40668	1.07666	0.765394
G9827	267.533	254.035	13.4976	0.0531326				G9827	267.533	254.035	13.4976	0.0531326				G3936	2.48318	1.37182	1.11136	0.810131
G23108	267.194	134.96	132.234	0.979803				G23108	267.194	134.96	132.234	0.979803				G4179	2.48218	1.39925	1.08292	0.773926
G24756	266.862	205.462	61.3999	0.298838				G24756	266.862	205.462	61.3999	0.298838				G35342	2.476	1.39607	1.07994	0.773558
G36509	266.505	246.704	19.8013	0.0802636				G36509	266.505	246.704	19.8013	0.0802636				G26367	2.46789	1.39495	1.07294	0.769161
G26952	266.34	229.154	37.1859	0.162275				G26952	266.34	229.154	37.1859	0.162275				G7406	2.46721	1.38264	1.08456	0.784413
G27126	265.883	248.806	17.0774	0.0686374				G27126	265.883	248.806	17.0774	0.0686374				G12110	2.46323	1.39179	1.07144	0.769827
G17277	265.603	104.39	161.212	1.54432				G17277	265.603	104.39	161.212	1.54432				G2481	2.45992	1.37589	1.08403	0.787878
G25808	265.282	89.5797	175.703	1.96141				G25808	265.282	89.5797	175.703	1.96141				G19676	2.45857	1.38959	1.06897	0.76927
G12118	265.037	200.116	64.9209	0.324417				G12118	265.037	200.116	64.9209	0.324417				G17165	2.44725	1.36982	1.07743	0.786549
G11961	264.565	239.129	25.436	0.106369				G11961	264.565	239.129	25.436	0.106369				G17756	2.44207	1.36706	1.07501	0.786371
G33858	264.433	235.495	28.9377	0.12288				G33858	264.433	235.495	28.9377	0.12288				G8933	2.43475	1.35183	1.08292	0.801079
G20286	264.295	251.59	12.7046	0.0504973				G20286	264.295	251.59	12.7046	0.0504973				G27977	2.43327	1.35889	1.07438	0.790629
G9562	263.605	186.515	77.0903	0.41332				G9562	263.605	186.515	77.0903	0.41332				G20563	2.43041	1.34059	1.08982	0.812943
G22493	263.21	140.085	123.125	0.878924				G22493	263.21	140.085	123.125	0.878924				G16040	2.4184	1.32858	1.08982	0.820289
G36600	262.689	239.15	23.5392	0.0984285				G36600	262.689	239.15	23.5392	0.0984285				G14874	2.41555	1.24933	1.16622	0.933477
G26562	262.427	230.299	32.1283	0.139507				G26562	262.427	230.299	32.1283	0.139507				G762	2.41475	1.3202	1.09455	0.829075
G25944	262.273	172.237	90.0361	0.522747				G25944	262.273	172.237	90.0361	0.522747				G35230	2.41304	1.33908	1.07396	0.802015
G12884	262.26	157.357	104.903	0.66666				G12884	262.26	157.357	104.903	0.66666				G31558	2.40978	1.33312	1.07666	0.807628
G12253	262.162	161.83	100.332	0.619984				G12253	262.162	161.83	100.332	0.619984				G25229	2.4039	1.32724	1.07666	0.811204
G32877	261.813	231.897	29.9161	0.129006				G32877	261.813	231.897	29.9161	0.129006				G14855	2.40236	1.32798	1.07438	0.809031
G6986	261.121	235.096	26.0247	0.110698				G6986	261.121	235.096	26.0247	0.110698				G754	2.40208	1.31916	1.08292	0.820919
G5890	261.092	45.1728	215.919	4.77984				G5890	261.092	45.1728	215.919	4.77984				G30162	2.39855	1.32112	1.07743	0.81554
G24877	260.92	105.245	155.674	1.47916				G24877	260.92	105.245	155.674	1.47916				G12140	2.39564	1.31701	1.07863	0.819
G2563	260.647	207.253	53.3942	0.257629				G2563	260.647	207.253	53.3942	0.257629				G10904	2.38035	1.30819	1.07216	0.819576
G23974	259.938	147.706	112.231	0.759826				G23974	259.938	147.706	112.231	0.759826				G16278	2.37894	1.29491	1.08403	0.837148
G5372	259.915	167.157	92.7576	0.554912				G5372	259.915	167.157	92.7576	0.554912				G27511	2.37398	1.27943	1.09455	0.855495
G26785	259.829	206.917	52.912	0.255716				G26785	259.829	206.917	52.912	0.255716				G23087	2.36929	1.28637	1.08292	0.841843
G21020	259.424	185.224	74.199	0.40059				G21020	259.424	185.224	74.199	0.40059				G14551	2.36875	1.28324	1.08551	0.84591
G21682	259.395	190.41	68.9853	0.362299				G21682	259.395	190.41	68.9853	0.362299				G35131	2.35891	1.27548	1.08344	0.849434
G21629	259.358	173.418	85.9407	0.49557				G21629	259.358	173.418	85.9407	0.49557				G25992	2.3559	1.27246	1.08344	0.851448
G19162	259.301	212.283	47.0181	0.221488				G19162	259.301	212.283	47.0181	0.221488				G28301	2.35529	1.23014	1.12515	0.914646
G14352	258.857	106.305	152.552	1.43503				G14352	258.857	106.305	152.552	1.43503				G31538	2.3549	1.27086	1.08403	0.852989
G25771	258.645	186.906	71.7393	0.383825				G25771	258.645	186.906	71.7393	0.383825				G22149	2.34704	1.27163	1.07541	0.845693
G7998	258.35	241.172	17.1781	0.0712278				G7998	258.35	241.172	17.1781	0.0712278				G17005	2.34518	1.26226	1.08292	0.857919
G12623	258.22	213.97	44.2501	0.206805				G12623	258.22	213.97	44.2501	0.206805				G6560	2.34349	1.27055	1.07294	0.84447
G26156	257.978	212.335	45.6425	0.214955				G26156	257.978	212.335	45.6425	0.214955				G28461	2.34314	1.2526	1.09053	0.870615
G21829	257.596	241.321	16.2755	0.0674435				G21829	257.596	241.321	16.2755	0.0674435				G26917	2.33787	1.26797	1.0699	0.843792
G29880	257.297	249.418	7.87905	0.0315898				G29880	257.297	249.418	7.87905	0.0315898				G6985	2.33564	1.24511	1.09053	0.875854
G4628	257.29	233.311	23.9797	0.10278				G4628	257.29	233.311	23.9797	0.10278				G7575	2.33386	1.25043	1.08343	0.866447
G14562	257.133	217.604	39.5298	0.18166				G14562	257.133	217.604	39.5298	0.18166				G14883	2.33229	1.26013	1.07216	0.850831
G30872	256.979	250.098	6.88039	0.0275107				G30872	256.979	250.098	6.88039	0.0275107				G26279	2.33114	1.25574	1.07541	0.856396
G2275	256.22	234.48	21.7405	0.0927177				G2275	256.22	234.48	21.7405	0.0927177				G27258	2.33001	1.24545	1.08456	0.870823
G21210	256.013	46.0073	210.005	4.56461				G21210	256.013	46.0073	210.005	4.56461				G36882	2.32967	1.23985	1.08982	0.878994
G7598	255.857	103.952	151.905	1.4613				G7598	255.857	103.952	151.905	1.4613				G28939	2.3219	1.23898	1.08292	0.874041
G28670	255.771	178.111	77.6596	0.436018				G28670	255.771	178.111	77.6596	0.436018				G6291	2.31973	1.23954	1.0802	0.871452
G16141	255.487	201.826	53.6605	0.265875				G16141	255.487	201.826	53.6605	0.265875				G27491	2.30819	1.23153	1.07666	0.874247
G11894	255.24	155.286	99.9547	0.643683				G11894	255.24	155.286	99.9547	0.643683				G8428	2.30389	1.23492	1.06897	0.865624
G16986	254.854	93.9747	160.879	1.71194				G16986	254.854	93.9747	160.879	1.71194				G33696	2.29513	1.21221	1.08292	0.89334
G16767	254.711	240.369	14.3426	0.0596689				G16767	254.711	240.369	14.3426	0.0596689				G6417	2.29186	1.20894	1.08292	0.895757
G105	254.564	219.472	35.0919	0.159892				G105	254.564	219.472	35.0919	0.159892				G24886	2.29022	1.2073	1.08292	0.896976
G6627	253.642	240.039	13.6032	0.0566706				G6627	253.642	240.039	13.6032	0.0566706				G15038	2.28877	1.20534	1.08343	0.898858
G22068	253.579	204.719	48.8602	0.238669				G22068	253.579	204.719	48.8602	0.238669				G11827	2.28328	1.20334	1.07994	0.897452
G17429	253.383	240.796	12.5865	0.0522701				G17429	253.383	240.796	12.5865	0.0522701				G6103	2.27446	1.19135	1.08311	0.909145
G15721	253.189	80.8998	172.289	2.12966				G15721	253.189	80.8998	172.289	2.12966				G26207	2.26255	1.18754	1.07501	0.905248
G8403	252.434	149.862	102.572	0.684445				G8403	252.434	149.862	102.572	0.684445				G22564	2.26125	1.16671	1.09455	0.938151
G14896	252.363	122.338	130.025	1.06283				G14896	252.363	122.338	130.025	1.06283				G17697	2.25999	1.17596	1.08403	0.921831
G34611	252.112	94.6392	157.473	1.66393				G34611	252.112	94.6392	157.473	1.66393				G8244	2.25653	1.17102	1.08551	0.926979
G8680	251.92	208.771	43.1487	0.206679				G8680	251.92	208.771	43.1487	0.206679				G26908	2.25367	1.17075	1.08292	0.924976
G24191	251.636	224.841	26.7949	0.119173				G24191	251.636	224.841	26.7949	0.119173				G36485	2.25316	1.1686	1.08456	0.928091
G32047	251.447	162.327	89.1195	0.549011				G32047	251.447	162.327	89.1195	0.549011				G33901	2.24876	1.16584	1.08292	0.928875
G15558	251.368	206.467	44.9007	0.217471				G15558	251.368	206.467	44.9007	0.217471				G19714	2.24106	1.16199	1.07907	0.928639
G25326	251.363	201.308	50.0547	0.248647				G25326	251.363	201.308	50.0547	0.248647				G25276	2.2359	1.11795	1.11795	1
G26569	251.206	238.71	12.4959	0.0523475				G26569	251.206	238.71	12.4959	0.0523475				G14814	2.22839	1.15695	1.07144	0.926091
G24626	251.082	177.208	73.8738	0.416876				G24626	251.082	177.208	73.8738	0.416876				G29403	2.22622	1.11311	1.11311	1
G31689	250.69	129.58	121.109	0.934627				G31689	250.69	129.58	121.109	0.934627				G30494	2.22271	1.11136	1.11136	1
G5714	250.482	101.003	149.48	1.47996				G5714	250.482	101.003	149.48	1.47996				G11646	2.21419	1.14428	1.0699	0.934999
G28777	250.478	224.03	26.448	0.118056				G28777	250.478	224.03	26.448	0.118056				G8789	2.2073	1.12438	1.08292	0.963126
G4242	250.388	243.401	6.98685	0.0287051				G4242	250.388	243.401	6.98685	0.0287051				G15178	2.18909	1.09455	1.09455	1
G5927	250.069	141.382	108.686	0.768742				G5927	250.069	141.382	108.686	0.768742				G1747	2.1849	1.11094	1.07396	0.966712
G34631	249.551	102.447	147.104	1.43591				G34631	249.551	102.447	147.104	1.43591				G18731	2.17964	1.08982	1.08982	1
G27524	249.312	243.806	5.5056	0.0225818				G27524	249.312	243.806	5.5056	0.0225818				G19084	2.17567	1.08783	1.08783	1
G24284	248.939	241.601	7.33744	0.03037				G24284	248.939	241.601	7.33744	0.03037				G22508	2.17544	1.08772	1.08772	1
G12576	248.576	132.106	116.469	0.881633				G12576	248.576	132.106	116.469	0.881633				G29766	2.17544	1.08772	1.08772	1
G28476	248.535	224.056	24.4788	0.109253				G28476	248.535	224.056	24.4788	0.109253				G35322	2.17544	1.08772	1.08772	1
G2321	248.51	209.907	38.6024	0.183902				G2321	248.51	209.907	38.6024	0.183902				G479	2.17456	1.08728	1.08728	1
G15519	248.275	138.867	109.409	0.787868				G15519	248.275	138.867	109.409	0.787868				G16223	2.17102	1.08551	1.08551	1
G6050	248.157	205.593	42.5642	0.207032				G6050	248.157	205.593	42.5642	0.207032				G25152	2.16913	1.08456	1.08456	1
G12075	247.852	145.5	102.351	0.703445				G12075	247.852	145.5	102.351	0.703445				G25892	2.16622	1.08311	1.08311	1
G6672	247.842	236.489	11.353	0.0480067				G6672	247.842	236.489	11.353	0.0480067				G30127	2.16622	1.08311	1.08311	1
G9393	247.559	225.285	22.2737	0.0988689				G9393	247.559	225.285	22.2737	0.0988689				G25954	2.1588	1.0794	1.0794	1
G10326	247.442	178.182	69.2595	0.3887				G10326	247.442	178.182	69.2595	0.3887				G8162	2.1588	1.0794	1.0794	1
G384	247.108	188.235	58.873	0.312764				G384	247.108	188.235	58.873	0.312764				G2355	2.15727	1.07863	1.07863	1
G7987	247.072	139.155	107.917	0.775514				G7987	247.072	139.155	107.917	0.775514				G26406	2.15727	1.07863	1.07863	1
G19719	246.612	97.6365	148.975	1.52582				G19719	246.612	97.6365	148.975	1.52582				G31599	2.15486	1.07743	1.07743	1
G24376	246.327	223.87	22.4572	0.100313				G24376	246.327	223.87	22.4572	0.100313				G6809	2.15486	1.07743	1.07743	1
G24868	246.294	200.68	45.6138	0.227296				G24868	246.294	200.68	45.6138	0.227296				G23929	2.1546	1.0773	1.0773	1
G26930	246.229	164.338	81.8912	0.498311				G26930	246.229	164.338	81.8912	0.498311				G14396	2.15332	1.07666	1.07666	1
G22316	246.059	229.991	16.0682	0.0698643				G22316	246.059	229.991	16.0682	0.0698643				G24035	2.14588	1.07294	1.07294	1
G3352	245.969	226.271	19.6982	0.0870558				G3352	245.969	226.271	19.6982	0.0870558				G20018	2.14432	1.07216	1.07216	1
G24426	245.823	208.734	37.0891	0.177686				G24426	245.823	208.734	37.0891	0.177686				G6392	2.14432	1.07216	1.07216	1
G32617	245.544	224.047	21.4976	0.0959517
G12103	245.385	222.968	22.4174	0.100541
G19613	244.802	183.461	61.3412	0.334356
G33046	244.745	213.297	31.4486	0.147441
G6330	244.68	230.695	13.9854	0.0606229
G1944	244.622	225.306	19.3163	0.0857337
G16349	244.528	168.711	75.8163	0.449384
G30951	244.14	230.117	14.0232	0.0609396
G34969	244.032	107.571	136.461	1.26856
G1781	243.737	90.0026	153.734	1.70811
G20104	243.694	225.305	18.3888	0.0816175
G5297	243.638	196.01	47.6284	0.24299
G13929	243.605	220.44	23.1643	0.105082
G34911	243.483	229.117	14.3652	0.0626978
G36638	243.164	103.235	139.929	1.35545
G30715	243.094	101.864	141.23	1.38645
G2062	243.077	130.567	112.511	0.861709
G6889	242.8	174.885	67.9155	0.388344
G29882	242.606	132.945	109.66	0.824853
G28982	242.172	228.919	13.2521	0.05789
G22537	242.164	137.412	104.751	0.762314
G10396	241.838	196.098	45.74	0.233251
G11718	241.545	203.075	38.4702	0.189438
G15728	241.241	189.63	51.6105	0.272164
G24291	240.841	232.006	8.83541	0.0380827
G11352	240.768	232.59	8.1786	0.0351632
G17057	240.575	179.326	61.249	0.341551
G20266	240.518	93.2316	147.287	1.5798
G1067	240.422	220.15	20.2723	0.0920842
G6670	239.901	227.831	12.0697	0.0529765
G33835	239.692	217.77	21.9219	0.100666
G4929	239.492	226.754	12.7382	0.0561762
G20502	239.25	107.036	132.214	1.23523
G21636	239.235	220.171	19.0646	0.0865901
G9988	239.219	129.14	110.078	0.852394
G10595	239.204	177.591	61.6127	0.346936
G29853	238.99	122.603	116.387	0.949298
G20039	238.592	178.192	60.3998	0.338959
G34255	237.978	201.549	36.4289	0.180745
G25351	237.893	164.65	73.2432	0.444842
G27136	237.562	198.707	38.8547	0.195538
G13143	237.216	225.307	11.9092	0.0528577
G14181	237.199	141.651	95.5471	0.674522
G14895	237.022	122.237	114.784	0.939027
G30115	236.759	126.344	110.414	0.873916
G8820	236.284	69.0764	167.207	2.42061
G22030	235.912	213.295	22.6175	0.106039
G8592	235.42	90.7218	144.698	1.59496
G36773	235.292	157.93	77.362	0.489851
G35933	235.181	165.081	70.0999	0.42464
G18900	234.804	56.3524	178.452	3.16671
G30670	234.238	138.859	95.3784	0.686871
G4911	234.179	218.206	15.9729	0.0732011
G15160	234.083	205.802	28.2807	0.137417
G30154	233.455	204.3	29.155	0.142707
G5777	233.406	216.877	16.5296	0.0762165
G9670	233.373	114.782	118.591	1.03318
G22031	233.223	157.509	75.7143	0.480699
G16830	233.09	129.279	103.811	0.803
G19024	233.001	132.223	100.778	0.762188
G31346	232.837	112.68	120.156	1.06635
G35345	232.693	231.532	1.16092	0.00501407
G29333	232.434	119.369	113.065	0.94719
G14975	232.41	199.063	33.3472	0.167521
G17791	232.366	211.035	21.3315	0.101081
G6529	232.296	179.431	52.8656	0.29463
G11924	231.982	177.871	54.1106	0.304212
G31077	231.873	203.956	27.9166	0.136876
G8864	231.693	65.393	166.3	2.54309
G32150	231.682	189.919	41.7636	0.219903
G23311	231.659	222.997	8.66288	0.0388476
G13906	231.452	209.016	22.4365	0.107344
G31638	231.383	189.583	41.7997	0.220483
G8853	231.313	144.349	86.9632	0.60245
G6667	230.56	138.883	91.6766	0.660098
G18163	230.53	206.484	24.0456	0.116452
G36402	230.337	214.089	16.2474	0.0758906
G17083	230.314	116.641	113.672	0.974547
G15489	229.991	219.677	10.3139	0.0469504
G20702	229.767	42.715	187.052	4.37908
G14313	229.546	194.708	34.8388	0.178929
G26903	228.967	212.816	16.1507	0.0758905
G29900	228.953	158.195	70.7587	0.447289
G13911	228.919	55.3278	173.591	3.1375
G27950	228.909	212.251	16.6577	0.0784809
G34375	228.713	225.329	3.3835	0.0150158
G8877	228.4	216.758	11.6422	0.0537106
G31123	228.366	111.546	116.82	1.04729
G16747	228.233	176.95	51.2826	0.289814
G25369	228.138	138.653	89.4854	0.645391
G26870	227.765	196.678	31.0864	0.158057
G19370	227.671	212.881	14.7903	0.069477
G18269	227.52	111.439	116.081	1.04165
G12784	227.338	130.099	97.2392	0.747423
G24248	227.205	208.629	18.5752	0.0890344
G25354	227.005	197.475	29.5301	0.149538
G30179	226.939	121.772	105.167	0.863638
G12556	226.784	150.261	76.5228	0.509265
G3787	226.46	215.14	11.3204	0.0526187
G18168	225.973	54.1806	171.792	3.17074
G5342	225.735	219.603	6.13203	0.0279233
G1914	225.609	106.682	118.927	1.11478
G14383	225.564	213.407	12.1572	0.0569673
G29227	225.42	129.819	95.6017	0.736425
G2584	225.011	187.466	37.5454	0.200279
G17804	224.724	173.55	51.1736	0.294864
G10727	224.656	139.683	84.973	0.608328
G10427	224.651	183.728	40.9228	0.222736
G21779	224.516	137.792	86.7241	0.629384
G28007	224.393	94.4921	129.901	1.37473
G22136	224.351	171.208	53.1427	0.310398
G21707	224.338	150.553	73.7855	0.490097
G9403	224.155	90.1674	133.988	1.48599
G35234	224.114	143.777	80.337	0.558759
G28766	223.779	204.639	19.1407	0.0935341
G8657	223.417	124.046	99.3719	0.801092
G20025	223.389	87.8298	135.559	1.54342
G3753	223.334	128.157	95.1772	0.742662
G23692	223.049	214.024	9.02496	0.042168
G11777	222.881	210.428	12.4526	0.0591774
G28287	222.511	100.393	122.118	1.2164
G28428	222.134	129.595	92.539	0.714065
G23010	222.111	59.7267	162.384	2.71879
G29024	221.919	218.643	3.27622	0.0149843
G29339	221.267	100.451	120.816	1.20273
G35539	221.046	188.522	32.5235	0.172518
G33907	220.73	118.458	102.272	0.863364
G16754	220.689	180.669	40.0196	0.221507
G7956	220.584	212.85	7.73432	0.0363369
G19809	220.557	88.4109	132.146	1.49468
G5489	220.157	189.557	30.5997	0.161427
G35945	220.078	88.1949	131.883	1.49536
G34703	219.614	201.904	17.7102	0.0877159
G23355	219.153	174.275	44.8779	0.257511
G2167	219.061	70.1558	148.905	2.12249
G32585	218.97	158.486	60.4841	0.381637
G30141	218.691	146.266	72.425	0.49516
G36115	218.535	115.979	102.556	0.884268
G15153	218.382	155.543	62.8391	0.403999
G1590	217.96	106.726	111.234	1.04224
G36113	217.799	116.768	101.031	0.865235
G22180	217.254	88.1655	129.089	1.46417
G29653	217.125	199.265	17.8599	0.089629
G4299	216.757	198.733	18.0238	0.0906935
G6453	216.576	207.761	8.81515	0.0424292
G12936	216.061	76.6177	139.443	1.81999
G12990	216	194.464	21.5353	0.110742
G12486	215.969	90.9158	125.053	1.37548
G20387	215.878	172.099	43.7794	0.254385
G14811	215.748	144.032	71.7165	0.497921
G12162	215.515	186.593	28.9219	0.155
G4224	215.252	194.452	20.7993	0.106963
G29909	215.101	192.419	22.682	0.117878
G15163	214.845	85.9803	128.865	1.49877
G18891	214.839	177.638	37.2015	0.209423
G31390	214.226	173.5	40.7263	0.234734
G2044	214.124	137.382	76.7415	0.558598
G21076	213.889	206.326	7.56288	0.0366551
G19341	213.785	64.6808	149.104	2.30523
G34153	213.333	202.594	10.7394	0.0530096
G5565	212.944	191.299	21.6449	0.113147
G32592	212.526	138.758	73.7686	0.531636
G24707	212.515	191.507	21.008	0.109698
G25412	212.129	131.088	81.041	0.618218
G3057	211.772	188.679	23.0931	0.122394
G12338	211.49	64.2207	147.269	2.29317
G5972	211.442	145.598	65.8435	0.452227
G688	211.401	171.556	39.8454	0.232259
G8716	211.107	123.936	87.1703	0.703346
G9121	211.019	207.931	3.08772	0.0148497
G29857	210.962	88.6344	122.327	1.38013
G5326	210.717	177.397	33.3201	0.187828
G5595	210.643	161.329	49.3139	0.305674
G29887	210.612	148.668	61.9446	0.416665
G8555	210.565	134.151	76.4134	0.569606
G9101	210.503	187.44	23.0638	0.123046
G25482	210.091	190.127	19.9638	0.105002
G271	209.931	120.081	89.8506	0.748253
G22742	209.801	182.206	27.5946	0.151447
G24087	209.789	186.247	23.542	0.126402
G5329	209.725	194.614	15.1107	0.0776445
G19540	209.701	191.912	17.7893	0.0926952
G3315	209.582	150.381	59.2006	0.39367
G23297	209.41	203.976	5.43403	0.0266405
G29384	208.986	147.501	61.4852	0.416846
G26696	208.809	196.597	12.2118	0.0621159
G14404	208.565	70.3459	138.219	1.96484
G34859	208.564	191.08	17.4834	0.0914978
G21999	208.177	185.984	22.193	0.119327
G33261	208.146	145.894	62.2526	0.426698
G6179	208.055	124.857	83.1973	0.666338
G18123	207.926	68.8337	139.092	2.02069
G35146	207.769	187.133	20.6355	0.110272
G1952	207.62	168.293	39.3276	0.233686
G16017	207.582	202.014	5.56792	0.0275621
G21645	207.388	153.008	54.3798	0.355404
G3091	207.364	183.986	23.3777	0.127062
G32402	207.196	116.987	90.2095	0.77111
G17627	207.159	156.405	50.7544	0.324507
G4458	206.869	109.62	97.2492	0.88715
G25208	206.844	53.3067	153.537	2.88025
G6677	206.289	75.4145	130.874	1.7354
G12938	206.124	134.267	71.8578	0.535188
G36603	205.749	191.107	14.6416	0.0766149
G8041	205.748	74.2751	131.473	1.77008
G21855	205.294	122.378	82.9157	0.677538
G34890	205.27	167.529	37.7406	0.225278
G20572	205.113	194.322	10.791	0.0555318
G29461	204.947	193.207	11.7394	0.0607604
G12026	204.826	174.382	30.4434	0.174578
G18307	204.371	197.64	6.73093	0.0340565
G4484	204.224	190.172	14.0529	0.0738957
G10391	203.896	200.691	3.20499	0.0159698
G12001	203.716	195.945	7.77166	0.0396625
G4398	203.598	62.5542	141.044	2.25475
G493	203.554	178.114	25.4402	0.142831
G35319	203.516	170.089	33.427	0.196527
G23332	203.31	130.687	72.6234	0.555705
G31138	203.247	66.6013	136.645	2.05169
G33838	202.829	158.895	43.9338	0.276496
G24885	202.104	166.084	36.0194	0.216874
G19844	202.101	91.1804	110.92	1.21649
G20303	201.97	189.526	12.4438	0.0656574
G6325	201.827	104.053	97.7741	0.939656
G36185	201.755	160.383	41.3718	0.257956
G22969	201.622	198.538	3.08414	0.0155343
G33541	201.545	113.193	88.3517	0.780538
G5919	201.42	171.914	29.5062	0.171633
G24117	200.997	147.796	53.2004	0.359957
G9012	200.872	197.382	3.48981	0.0176804
G25530	200.726	68.6209	132.105	1.92514
G10605	200.644	75.1479	125.496	1.66998
G24971	200.576	103.647	96.928	0.93517
G3462	200.388	186.677	13.711	0.0734477
G16076	200.343	171.511	28.832	0.168106
G16776	200.274	112.966	87.3076	0.772867
G6186	199.81	173.603	26.207	0.150959
G5261	199.667	143.106	56.5606	0.395236
G4192	198.8	152.101	46.6999	0.307033
G16643	198.687	182.858	15.8292	0.0865658
G18371	198.563	152.831	45.7322	0.299234
G13513	198.51	140.782	57.7274	0.410047
G29716	198.057	114.986	83.0713	0.722448
G34336	198.044	111.412	86.6323	0.777587
G19130	197.727	113.213	84.5141	0.746505
G21260	197.654	129.95	67.7039	0.520999
G3360	197.562	168.148	29.4145	0.174932
G4304	197.275	128.865	68.4094	0.530861
G27600	197.226	85.2126	112.013	1.31451
G34126	197.19	160.091	37.0996	0.231741
G9570	197.173	75.6178	121.555	1.60749
G26455	196.97	176.078	20.8923	0.118654
G2050	196.917	137.709	59.2074	0.429945
G24292	196.609	38.801	157.808	4.06711
G6640	196.556	185.466	11.0908	0.0597996
G5847	196.428	141.576	54.8524	0.387443
G32797	196.399	191.67	4.72974	0.0246765
G6190	195.381	175.062	20.3196	0.116071
G33487	195.324	187.909	7.41487	0.0394598
G22521	195.313	79.7345	115.578	1.44954
G14702	195.145	187.887	7.25817	0.0386306
G5386	194.728	121.589	73.1388	0.601523
G24172	194.093	178.683	15.4101	0.0862428
G21641	193.711	169.086	24.6255	0.145639
G28145	193.296	86.5111	106.785	1.23435
G22690	193.121	53.1258	139.995	2.63516
G15155	193.113	175.153	17.9603	0.102541
G908	193.038	127.245	65.7925	0.517053
G25883	193.014	135.316	57.6977	0.426391
G18131	192.951	169.683	23.2681	0.137127
G20627	192.841	62.6961	130.145	2.0758
G26264	192.607	177.154	15.4528	0.0872282
G656	192.426	94.8493	97.5767	1.02876
G10775	192.122	92.6338	99.4887	1.074
G16796	191.999	122.827	69.1728	0.563175
G23088	191.693	114.706	76.9868	0.671168
G1466	191.647	179.358	12.289	0.0685165
G2471	191.362	68.5844	122.778	1.79018
G1775	191.297	99.8421	91.4546	0.915993
G1427	191.202	132.39	58.8117	0.444231
G4131	190.679	108.7	81.9792	0.754177
G180	190.25	98.63	91.6204	0.92893
G19065	190.152	157.01	33.1412	0.211076
G4412	189.875	153.457	36.4178	0.237316
G30088	189.703	108.558	81.1452	0.747485
G35877	189.678	161.274	28.4038	0.176121
G31108	189.194	117.604	71.59	0.608736
G33030	189.08	172.433	16.6471	0.0965425
G30068	189.056	113.268	75.7872	0.669094
G7021	189.044	161.163	27.8808	0.172997
G36597	188.391	153.798	34.5935	0.224929
G10318	188.255	184.826	3.42891	0.0185521
G30635	188.047	120.993	67.0549	0.554207
G32061	187.918	150.21	37.7085	0.251039
G12649	187.79	180.056	7.73388	0.0429526
G31553	187.766	150.443	37.3228	0.248085
G4888	187.661	177.003	10.6575	0.0602106
G14498	187.65	128.237	59.4131	0.463307
G25366	187.438	179.116	8.32124	0.0464572
G4312	187.38	69.4003	117.979	1.69998
G23861	187.072	47.0267	140.045	2.97799
G4959	186.704	126.833	59.8709	0.472044
G11565	186.6	65.6088	120.992	1.84414
G3246	186.576	159.765	26.8115	0.167819
G20487	186.542	126.719	59.8228	0.472091
G32667	186.401	165.208	21.193	0.128281
G22720	186.364	65.4435	120.92	1.84771
G35919	186.063	124.754	61.3093	0.491443
G28796	186.036	115.728	70.3083	0.607531
G14390	185.932	78.2244	107.707	1.3769
G20557	185.928	144.393	41.5356	0.287657
G25372	185.764	81.4926	104.271	1.27952
G32884	185.567	159.79	25.7773	0.16132
G6692	185.528	109.666	75.8628	0.691764
G11561	185.496	68.2621	117.234	1.71742
G22297	185.467	166.606	18.861	0.113207
G20230	185.435	153.612	31.8238	0.207171
G16387	185.155	153.105	32.0507	0.209338
G7967	185.061	123.867	61.1948	0.494038
G6153	184.72	84.9178	99.8027	1.17529
G36578	184.72	130.714	54.0065	0.413167
G12024	184.669	169.732	14.9367	0.0880019
G1086	184.644	147.469	37.1758	0.252093
G26893	184.558	164.21	20.3479	0.123914
G14512	184.348	135.871	48.4777	0.356793
G1935	184.233	140.733	43.4991	0.309089
G9829	184.211	114.727	69.4844	0.605652
G1432	183.866	128.693	55.173	0.428718
G12652	183.592	154.112	29.4796	0.191287
G9249	183.586	171.688	11.8978	0.0692989
G10698	183.569	146.791	36.7781	0.250548
G32892	183.517	168.426	15.0906	0.0895979
G16228	183.476	121.165	62.3114	0.51427
G5265	183.095	128.316	54.779	0.426907
G28984	182.764	173.262	9.50232	0.0548437
G30140	182.403	79.1724	103.23	1.30387
G1656	182.274	122.003	60.2704	0.494005
G29763	182.177	152.732	29.4448	0.192788
G29039	181.897	81.6472	100.25	1.22784
G32876	181.825	164.609	17.2164	0.10459
G26159	181.679	94.6006	87.0787	0.920489
G10650	181.648	80.8703	100.778	1.24617
G16810	181.611	86.9013	94.7095	1.08985
G31608	181.471	141.943	39.5285	0.278482
G20214	181.04	88.1171	92.9228	1.05454
G17538	180.929	159.068	21.861	0.137432
G30126	180.836	106.314	74.5223	0.700968
G23984	180.733	144.509	36.2241	0.25067
G36381	180.557	93.1816	87.3754	0.937689
G14978	180.492	139.167	41.3248	0.296944
G21333	179.855	161.613	18.2423	0.112877
G30732	179.397	112.073	67.3239	0.600714
G30051	179.084	87.81	91.274	1.03945
G35253	178.764	157.903	20.8613	0.132115
G32048	178.364	156.943	21.4207	0.136487
G11914	178.128	158.422	19.7059	0.124389
G33125	178.119	148.579	29.54	0.198816
G12101	177.995	124.523	53.4721	0.429415
G3513	177.87	127.737	50.1326	0.392466
G5817	177.426	101.064	76.3622	0.755583
G9860	177.395	99.876	77.5193	0.776156
G32975	177.384	83.6385	93.7451	1.12084
G36150	176.727	105.77	70.9567	0.670855
G5737	176.63	129.99	46.6406	0.358802
G21666	176.317	154.768	21.5489	0.139233
G34727	176.153	159.457	16.6962	0.104707
G16558	176.096	68.9729	107.124	1.55313
G33214	175.579	87.1585	88.4203	1.01448
G181	175.225	89.0814	86.1438	0.967024
G32799	175.136	152.09	23.0452	0.151523
G20092	175.089	90.1443	84.9443	0.942315
G13016	174.901	89.5319	85.3686	0.953499
G34256	174.702	74.0503	100.652	1.35923
G12098	174.623	155.911	18.7122	0.120018
G17895	174.387	130.81	43.5766	0.333129
G12577	174.134	25.7336	148.401	5.76681
G18274	173.997	129.114	44.8832	0.347626
G5413	173.845	43.5135	130.332	2.9952
G31417	173.798	74.0301	99.7676	1.34766
G8409	173.666	130.46	43.2055	0.331178
G11361	173.391	85.4702	87.9204	1.02867
G29713	173.291	158.041	15.2497	0.0964921
G18061	173.121	50.6891	122.432	2.41535
G30992	172.981	158.883	14.0984	0.0887345
G3940	172.951	153.389	19.5612	0.127527
G20560	172.868	147.644	25.2232	0.170838
G26867	172.675	61.3043	111.371	1.81668
G34379	172.511	96.9715	75.5395	0.778987
G4966	172.466	117.237	55.2288	0.471088
G33843	172.346	159.238	13.1075	0.0823137
G29818	172.208	142.362	29.8461	0.209649
G8571	172.079	66.8087	105.27	1.57569
G16301	171.882	160.912	10.9706	0.0681778
G7091	171.842	147.334	24.5083	0.166346
G6674	171.793	152.379	19.414	0.127406
G30080	171.699	138.255	33.4435	0.241897
G28481	171.694	150.111	21.5829	0.143779
G13972	171.594	147.63	23.9649	0.162331
G1560	171.503	105.228	66.2751	0.629824
G27942	171.494	127.291	44.203	0.347259
G32615	171.49	154.775	16.7158	0.108001
G35272	171.29	72.6363	98.6533	1.35818
G14381	171.29	147.654	23.6352	0.160072
G18331	170.938	146.565	24.3731	0.166295
G35751	170.726	108.306	62.4203	0.576334
G13260	170.675	162.577	8.09823	0.0498116
G2263	170.558	131.384	39.1741	0.298166
G31038	170.557	160.814	9.74297	0.0605853
G4032	170.515	152.972	17.5426	0.114679
G31623	170.398	111.336	59.0616	0.53048
G1024	170.309	150.64	19.6689	0.130569
G4140	170.212	147.933	22.2791	0.150603
G35353	169.977	143.409	26.5683	0.185263
G35261	169.715	151.476	18.2387	0.120406
G10208	169.588	64.2097	105.378	1.64115
G1137	169.362	145.582	23.7797	0.163342
G503	169.298	156.601	12.696	0.0810723
G36053	169.295	63.5451	105.75	1.66418
G13162	169.105	93.6712	75.4343	0.805309
G31854	169.086	145.05	24.036	0.165708
G14378	169.015	148.869	20.1466	0.135331
G31987	168.992	100.504	68.4887	0.681455
G29006	168.919	78.2465	90.6721	1.1588
G16935	168.785	119.936	48.8486	0.407289
G23262	168.664	95.2863	73.3776	0.770075
G23008	168.508	123.78	44.7287	0.361357
G35883	168.496	69.8488	98.6473	1.4123
G33231	168.439	159.899	8.53955	0.0534058
G4998	168.427	124.866	43.561	0.348863
G17002	168.328	137.575	30.7523	0.223531
G21599	168.02	162.866	5.15353	0.0316428
G1160	167.957	135.498	32.4592	0.239555
G1850	167.263	84.0835	83.18	0.989255
G33038	167.176	106.912	60.2634	0.563671
G19333	167.104	155.458	11.6456	0.0749116
G6257	166.976	156.309	10.6662	0.0682379
G27117	166.778	159.948	6.8301	0.0427019
G21880	166.726	162.974	3.7517	0.0230202
G27862	166.53	145.275	21.2555	0.146312
G30188	166.484	88.0044	78.4796	0.891769
G26298	166.418	39.4214	126.996	3.22151
G33282	166.235	137.518	28.7168	0.208822
G25563	166.201	99.517	66.6843	0.67008
G18092	166.039	87.7371	78.3021	0.892463
G25414	165.922	149.078	16.8438	0.112986
G21566	165.777	80.1192	85.6579	1.06913
G24465	165.665	142.948	22.7162	0.158912
G26385	165.579	132.232	33.3473	0.252188
G23807	165.318	150.117	15.2019	0.101267
G18978	165.309	41.524	123.784	2.98103
G14495	165.257	82.5718	82.685	1.00137
G15388	164.959	125.267	39.6923	0.316861
G18640	164.858	96.5745	68.2831	0.707051
G28302	164.803	71.4627	93.3408	1.30615
G33851	164.787	79.6827	85.1046	1.06804
G34554	164.759	120.352	44.407	0.368975
G26499	164.726	121.654	43.0722	0.354054
G21397	164.698	110.47	54.2275	0.49088
G32154	164.677	133.832	30.8458	0.230483
G33146	164.604	161.296	3.3077	0.020507
G4880	164.245	138.432	25.8131	0.186468
G35313	164.203	87.0635	77.1396	0.886015
G8390	164.016	84.5037	79.5127	0.940938
G9792	163.949	147.058	16.8911	0.11486
G31739	163.567	95.063	68.5038	0.720614
G28027	163.38	95.9945	67.3854	0.701971
G19960	163.334	117.419	45.9153	0.391039
G33187	163.316	61.6641	101.652	1.64848
G24855	163.239	125.973	37.2656	0.295822
G14057	163.013	75.2516	87.7619	1.16625
G21876	163.006	98.4578	64.5478	0.655588
G9015	162.885	145.423	17.4625	0.120081
G19679	162.268	138.458	23.8097	0.171964
G26592	162.209	145.187	17.0217	0.117239
G27909	162.197	100.322	61.875	0.616763
G18701	162.143	75.7707	86.3719	1.13991
G8873	161.775	146.576	15.1985	0.10369
G9990	161.675	105.962	55.7131	0.525782
G24581	161.349	150.459	10.8898	0.0723775
G6678	161.249	75.7154	85.5341	1.12968
G4755	161.233	146.624	14.6091	0.0996362
G23139	161.029	137.616	23.4128	0.170132
G17902	160.872	24.02	136.852	5.69743
G3526	160.643	111.367	49.2759	0.442465
G21322	160.641	143.693	16.9482	0.117948
G19757	160.631	134.635	25.9964	0.193088
G27137	160.413	134.69	25.7228	0.190978
G29204	160.192	138.134	22.058	0.159686
G28015	160.175	147.926	12.2493	0.0828075
G29694	160.154	118.852	41.3019	0.347507
G26941	160.152	144.644	15.5074	0.107211
G17588	159.777	129.507	30.2707	0.233739
G30542	159.742	119.059	40.6824	0.341699
G23217	159.72	84.0814	75.6387	0.899589
G18194	159.623	117.236	42.3871	0.361554
G17569	159.572	150.266	9.30579	0.0619287
G35846	159.554	119.704	39.8495	0.3329
G25434	159.472	93.7676	65.7042	0.700714
G9359	159.382	123.322	36.0595	0.2924
G31004	159.132	154.87	4.26273	0.0275246
G21848	158.756	126.292	32.4637	0.257053
G19519	158.709	147.787	10.9225	0.0739074
G22325	158.642	132.239	26.4026	0.199658
G34434	158.584	83.5302	75.0538	0.898523
G12643	158.56	126.702	31.858	0.25144
G14465	158.43	146.36	12.0696	0.082465
G1976	158.286	156.095	2.19129	0.0140382
G12099	158.198	131.809	26.3886	0.200203
G27292	158.158	139.006	19.1521	0.137779
G16841	157.832	140.126	17.7061	0.126359
G4747	157.804	40.1313	117.673	2.93219
G11256	157.69	114.68	43.0102	0.375046
G14421	157.462	61.0269	96.4353	1.58021
G18109	157.118	116.71	40.4073	0.346219
G24557	157.006	89.8567	67.1493	0.747293
G36007	156.99	97.4924	59.4975	0.610279
G27014	156.984	77.8231	79.1605	1.01718
G16531	156.958	103.401	53.5574	0.517961
G12641	156.808	115.28	41.5281	0.360237
G28685	156.753	131.535	25.2189	0.191728
G9746	156.649	139.031	17.6179	0.126719
G3143	156.337	121.451	34.8859	0.287242
G10325	156.275	117.745	38.5296	0.327228
G14613	156.254	111.419	44.8353	0.402402
G11467	156.223	98.4425	57.7808	0.58695
G31645	156.161	78.6884	77.4727	0.98455
G24929	156.129	50.0335	106.096	2.1205
G33846	155.921	109.437	46.4836	0.424752
G20771	155.823	87.1788	68.644	0.787394
G27323	155.774	87.947	67.8265	0.77122
G26147	155.635	114.906	40.7293	0.354458
G9418	155.597	98.0008	57.5963	0.587713
G4725	155.579	125.63	29.949	0.238391
G7702	155.491	124.038	31.4535	0.25358
G30590	155.41	90.6261	64.7835	0.714844
G1365	155.36	105.204	50.1558	0.476748
G27105	155.321	94.5745	60.7462	0.64231
G31530	155.275	134.372	20.903	0.155561
G34140	155.156	81.148	74.0081	0.912014
G25571	155.072	84.2312	70.8409	0.84103
G20581	154.97	107.593	47.3766	0.440331
G22605	154.719	36.5902	118.129	3.22843
G16348	154.535	113.46	41.0753	0.362026
G33871	154.399	132.791	21.6078	0.162721
G7049	154.288	129.131	25.1565	0.194813
G29500	154.216	141.125	13.0903	0.0927568
G15644	154.174	10.6875	143.486	13.4256
G18902	154.052	85.0192	69.0327	0.811965
G33399	154.034	143.039	10.9952	0.0768684
G18347	153.919	104.149	49.7702	0.477877
G28802	153.858	59.9139	93.9441	1.56798
G3725	153.736	125.884	27.8518	0.22125
G27457	153.674	91.9797	61.6945	0.670741
G12777	153.625	90.309	63.316	0.701103
G6603	153.549	105.579	47.9703	0.454354
G13920	153.495	134.761	18.7342	0.139018
G23910	153.48	142.707	10.7729	0.07549
G29170	153.433	67.3909	86.0424	1.27677
G3719	153.186	124.956	28.23	0.225919
G5729	153.102	56.4187	96.6836	1.71368
G33045	153.017	66.4874	86.5296	1.30144
G31697	152.967	133.78	19.1876	0.143427
G7425	152.921	76.8549	76.0663	0.989739
G28163	152.74	103.532	49.2073	0.475284
G33691	152.375	95.2996	57.0756	0.598907
G17915	152.346	141.905	10.4409	0.0735766
G26665	152.138	129.546	22.5918	0.174392
G15887	152.127	68.8902	83.2373	1.20826
G3483	152.09	58.7585	93.3317	1.5884
G22393	151.957	112.342	39.6157	0.352636
G26195	151.957	122.906	29.0508	0.236366
G3340	151.93	63.5659	88.3638	1.39011
G32857	151.914	46.516	105.398	2.26584
G24528	151.678	102.694	48.9836	0.476984
G17338	151.677	74.9125	76.7647	1.02473
G2381	151.591	98.7433	52.8475	0.535201
G23145	151.577	146.812	4.76428	0.0324515
G25506	151.486	73.6323	77.8536	1.05733
G15998	151.132	139.14	11.9919	0.0861859
G2244	150.74	134.386	16.3538	0.121692
G15917	150.697	63.8693	86.8282	1.35947
G2561	150.384	89.7104	60.6739	0.676331
G10561	150.341	132.326	18.0146	0.136138
G23850	150.28	70.1729	80.1066	1.14156
G14816	150.269	115.223	35.0456	0.304155
G36500	150.122	140.069	10.053	0.0717717
G34592	149.803	68.5154	81.288	1.18642
G25253	149.777	62.7538	87.0229	1.38674
G10653	149.579	125.25	24.3294	0.194246
G9749	149.528	77.9174	71.6108	0.919061
G4225	149.477	90.8041	58.6727	0.646145
G27095	149.435	131.39	18.0443	0.137334
G34460	149.299	77.428	71.8706	0.928225
G29507	149.267	141.386	7.88118	0.0557423
G25501	149.197	116.553	32.6441	0.28008
G7712	149.178	120.362	28.816	0.239412
G12032	149.169	115.639	33.5307	0.289961
G33156	148.983	73.2244	75.7584	1.03461
G5460	148.895	134.267	14.6282	0.108949
G13415	148.855	48.8042	100.051	2.05005
G12591	148.247	138.784	9.463	0.0681853
G31727	148.183	100.488	47.6945	0.474628
G17191	148.084	38.0978	109.987	2.88696
G11862	148.027	51.45	96.5774	1.87711
G3613	147.875	138.479	9.39573	0.0678496
G18340	147.727	126.187	21.5393	0.170693
G11900	147.423	120.605	26.8182	0.222364
G7250	147.382	74.7021	72.6797	0.972926
G15157	146.955	106.202	40.7528	0.383728
G11178	146.866	106.459	40.4061	0.379545
G19042	146.81	45.4242	101.386	2.23197
G27381	146.769	72.8174	73.9513	1.01557
G18420	146.724	44.7739	101.95	2.277
G18748	146.562	70.9094	75.6528	1.06689
G17215	146.534	118.309	28.225	0.23857
G5471	146.524	74.7472	71.7766	0.960257
G12609	146.524	71.7795	74.7442	1.0413
G25220	146.437	124.737	21.7	0.173966
G1750	146.412	127.471	18.9409	0.14859
G14103	146.235	125.463	20.7723	0.165565
G26762	146.102	57.2083	88.8942	1.55387
G11788	146.013	74.7531	71.2599	0.95327
G13826	145.864	122.87	22.9941	0.187142
G26310	145.857	135.414	10.4431	0.0771194
G35343	145.635	114.896	30.7398	0.267545
G3987	145.39	22.3118	123.078	5.51625
G19222	145.259	67.5952	77.6637	1.14895
G33275	145.217	137.9	7.31634	0.0530553
G14804	145.184	125.676	19.5087	0.15523
G9253	144.937	35.4204	109.517	3.09191
G29251	144.934	93.5629	51.3708	0.549051
G21615	144.67	37.2111	107.459	2.88782
G916	144.646	66.8134	77.8328	1.16493
G18458	144.641	95.1451	49.4956	0.520211
G31990	144.559	133.665	10.8941	0.0815028
G36844	144.508	125.629	18.879	0.150275
G3116	144.456	79.4489	65.0068	0.818221
G8340	144.406	66.8218	77.5847	1.16107
G19632	144.29	86.3329	57.957	0.671321
G9245	144.286	35.5927	108.693	3.0538
G19720	144.184	85.7972	58.3872	0.680526
G35773	144.099	105.335	38.764	0.368008
G666	143.989	139.532	4.45759	0.0319468
G32800	143.941	122.995	20.9456	0.170296
G32625	143.864	51.7018	92.1619	1.78257
G284	143.855	79.6951	64.1596	0.805064
G15287	143.711	26.6035	117.107	4.40195
G31632	143.633	96.8769	46.7564	0.482637
G2818	143.577	107.208	36.3691	0.339237
G19827	143.496	122.006	21.4903	0.176141
G27172	143.486	93.7215	49.7645	0.530982
G21761	143.374	108.999	34.3751	0.315372
G29890	143.351	62.348	81.0032	1.29921
G5154	143.047	88.8249	54.2226	0.610443
G14179	142.96	62.8198	80.1397	1.27571
G21279	142.891	104.898	37.992	0.362179
G31044	142.783	93.8625	48.9209	0.521198
G35298	142.777	95.2969	47.4796	0.498228
G8611	142.666	125.21	17.4555	0.13941
G10390	142.62	69.714	72.9064	1.04579
G5568	142.617	86.0112	56.6054	0.658116
G4351	142.613	82.92	59.6931	0.719887
G6042	142.549	139.577	2.97144	0.0212889
G343	142.546	107.901	34.6446	0.321077
G35939	142.334	141.127	1.20735	0.00855509
G36195	142.269	126.656	15.6121	0.123264
G31753	142.24	129.576	12.6634	0.0977293
G12906	142.19	88.4764	53.7139	0.607099
G29317	142.122	125.09	17.0319	0.136158
G21987	142.105	86.3765	55.7284	0.64518
G14431	142.081	66.4609	75.6199	1.13781
G11174	141.999	127.957	14.0421	0.109741
G6842	141.719	115.711	26.0082	0.224768
G17001	141.621	130.114	11.5066	0.0884344
G17354	141.511	86.7434	54.7675	0.631373
G36808	141.366	26.939	114.427	4.24762
G35799	141.319	132.967	8.35179	0.062811
G4596	141.296	94.9773	46.3191	0.487686
G5535	141.267	100.178	41.0892	0.410162
G16254	141.246	71.5087	69.7374	0.97523
G31649	141.089	48.4289	92.6604	1.91333
G2924	140.891	123.82	17.0707	0.137867
G17617	140.75	73.4457	67.3039	0.916377
G30722	140.69	89.9612	50.7286	0.563895
G20645	140.646	103.708	36.9383	0.356177
G23994	140.578	104.931	35.6472	0.339721
G10746	140.51	88.8448	51.6653	0.581523
G611	140.49	100.788	39.7021	0.393917
G20142	140.409	62.2209	78.1881	1.25662
G20037	140.398	129.382	11.0161	0.0851441
G15433	139.84	84.0279	55.8126	0.664215
G7419	139.828	99.2782	40.5496	0.408444
G30257	139.784	52.8482	86.9356	1.64501
G2723	139.714	43.996	95.7175	2.17559
G19823	139.685	136.911	2.77394	0.0202608
G167	139.593	29.1132	110.48	3.79485
G25572	139.504	98.2519	41.2519	0.419858
G33836	139.46	126.017	13.4428	0.106675
G4968	139.459	136.966	2.49333	0.018204
G19753	139.36	125.063	14.2965	0.114315
G15554	139.307	109.745	29.5618	0.269368
G16928	138.923	82.7367	56.186	0.679093
G10621	138.918	124.633	14.2854	0.11462
G23364	138.787	134.004	4.78256	0.0356896
G26585	138.737	86.8409	51.8966	0.597606
G25363	138.699	75.7751	62.9236	0.8304
G4341	138.524	91.5194	47.0051	0.513608
G20309	138.487	104.2	34.287	0.329049
G34729	138.404	127.624	10.7799	0.0844662
G14708	138.403	71.3209	67.0819	0.940565
G6108	138.325	83.1776	55.1476	0.66301
G5926	138.324	63.9609	74.363	1.16263
G3359	138.298	58.3231	79.9747	1.37123
G10381	138.29	110.84	27.4496	0.24765
G4009	138.269	48.6612	89.6076	1.84146
G19136	138.107	91.5987	46.5085	0.507742
G21572	138.054	32.3316	105.722	3.26993
G34240	138.008	108.216	29.792	0.2753
G27917	137.892	111.261	26.6309	0.239356
G2666	137.879	87.9629	49.9161	0.567468
G26598	137.849	112.715	25.1334	0.222981
G22882	137.762	125.794	11.9677	0.0951373
G7090	137.575	111.374	26.2011	0.235254
G30986	137.117	118.738	18.3789	0.154786
G35341	136.944	123.187	13.7565	0.111671
G11919	136.75	95.9535	40.7968	0.425173
G31058	136.386	69.2826	67.1034	0.968546
G18142	136.328	99.7474	36.5803	0.366729
G30069	136.267	75.287	60.98	0.809967
G20135	136.203	67.4229	68.78	1.02013
G19098	136.138	88.987	47.1509	0.529862
G8101	135.935	98.8465	37.0881	0.375209
G26684	135.841	113.026	22.8147	0.201853
G10025	135.294	83.8956	51.3987	0.61265
G24430	135.205	70.2617	64.9433	0.924306
G4188	135.006	106.412	28.5942	0.268711
G9459	135.001	41.2329	93.7676	2.2741
G10868	134.95	107.479	27.4704	0.255588
G17807	134.905	119.939	14.9656	0.124777
G14862	134.903	89.7359	45.1668	0.503331
G178	134.854	46.9549	87.899	1.87199
G3577	134.783	102.585	32.1982	0.313867
G4114	134.733	115.47	19.2627	0.166819
G22011	134.683	128.253	6.42984	0.0501341
G28457	134.609	107.587	27.0222	0.251166
G35179	134.533	105.207	29.3262	0.278748
G12923	134.254	96.1185	38.1359	0.396759
G33514	134.059	109.164	24.8951	0.228052
G22194	134.054	118.484	15.5707	0.131417
G14917	133.91	96.0878	37.8221	0.39362
G20677	133.719	107.319	26.3998	0.245992
G24064	133.678	98.0689	35.6087	0.363099
G13414	133.645	79.1878	54.4569	0.687693
G12114	133.607	129.775	3.83122	0.029522
G22478	133.526	60.0022	73.5235	1.22535
G22416	133.524	92.478	41.0457	0.443842
G26990	133.422	110.849	22.5726	0.203633
G16361	133.237	108.51	24.7275	0.227883
G33189	133.233	112.436	20.7974	0.184971
G9420	133.187	48.0697	85.1175	1.77071
G29338	133.173	89.1827	43.9905	0.493263
G27121	133.025	117.773	15.2522	0.129505
G20252	132.894	125.763	7.13151	0.056706
G23655	132.786	103.359	29.4269	0.284706
G14026	132.753	75.1166	57.6369	0.767299
G18511	132.707	130.485	2.22245	0.0170323
G10395	132.497	52.9716	79.5252	1.50128
G20373	132.48	68.1924	64.2874	0.942735
G2560	132.475	47.1966	85.2784	1.80688
G27625	132.346	126.837	5.50867	0.0434312
G34105	132.196	61.2975	70.8981	1.15662
G30913	132.175	109.773	22.4013	0.204068
G6159	131.939	118.686	13.2527	0.111662
G27271	131.646	112.065	19.5815	0.174734
G14852	131.41	99.0928	32.3172	0.32613
G36919	131.368	44.2028	87.1651	1.97194
G11865	131.204	45.5917	85.6122	1.8778
G17274	131.202	116.565	14.6378	0.125577
G6975	131.187	119.572	11.6152	0.0971401
G22319	131.094	116.956	14.138	0.120883
G14709	131.066	76.2461	54.8198	0.718985
G18970	130.962	115.233	15.7284	0.136492
G5151	130.851	64.9418	65.9089	1.01489
G20713	130.798	49.4895	81.3085	1.64295
G9553	130.79	95.9813	34.8084	0.362658
G35758	130.709	49.3389	81.3701	1.64921
G28763	130.692	120.765	9.92754	0.0822057
G10380	130.478	26.6849	103.793	3.88959
G26982	130.469	101.467	29.0026	0.285833
G3128	130.163	49.4434	80.7197	1.63257
G19873	130.116	92.88	37.2363	0.400907
G7373	130.086	126.814	3.27195	0.0258012
G7723	130.064	77.1187	52.9449	0.686538
G32250	129.981	97.7067	32.274	0.330315
G2385	129.919	109.593	20.326	0.185469
G26877	129.789	117.016	12.7724	0.109151
G8559	129.68	86.4229	43.2568	0.500525
G12932	129.668	95.9091	33.7585	0.351985
G24921	129.638	105.772	23.8659	0.225634
G435	129.634	25.5222	104.112	4.07927
G6217	129.629	112.187	17.4423	0.155476
G34999	129.568	76.6964	52.872	0.689367
G36851	129.558	60.4112	69.1472	1.14461
G31067	129.552	41.1826	88.3695	2.1458
G3101	129.552	109.488	20.0634	0.183247
G26614	129.528	120.799	8.72927	0.0722626
G3502	129.357	101.096	28.2612	0.279549
G36145	129.239	105.829	23.4104	0.22121
G973	129.212	124.738	4.47419	0.0358686
G487	129.199	33.8915	95.3074	2.81213
G11576	129.196	107.863	21.3324	0.197772
G14456	128.994	119.303	9.69169	0.0812362
G28408	128.948	91.6649	37.2835	0.406737
G5201	128.767	85.1652	43.6017	0.511966
G28740	128.748	74.0203	54.7278	0.739362
G19668	128.708	125.294	3.41338	0.0272429
G5934	128.62	79.0219	49.5984	0.627654
G2720	128.467	42.9616	85.5057	1.99028
G8831	128.359	57.5842	70.7744	1.22906
G22530	128.061	98.1181	29.9427	0.30517
G4276	127.992	113.826	14.1663	0.124456
G36180	127.781	121.451	6.32921	0.0521131
G22409	127.771	84.6292	43.1419	0.509776
G12834	127.559	61.1241	66.435	1.08689
G1664	127.557	98.8626	28.694	0.290241
G19821	127.476	94.6713	32.8047	0.346512
G33062	127.409	102.198	25.2101	0.246678
G3064	127.278	72.6156	54.6629	0.752771
G3474	127.255	95.379	31.8758	0.334202
G6679	127.139	40.1507	86.9884	2.16655
G36173	127.067	88.3689	38.6979	0.437913
G12878	127.003	31.8294	95.1733	2.9901
G21605	126.971	109.951	17.0204	0.1548
G23932	126.964	60.1012	66.8628	1.1125
G34979	126.953	120.324	6.62804	0.0550847
G30658	126.949	116.69	10.2597	0.0879232
G5996	126.946	119.214	7.73234	0.0648609
G14079	126.942	86.8023	40.1392	0.462421
G35903	126.912	63.4246	63.4869	1.00098
G21847	126.898	80.6889	46.2093	0.572685
G28533	126.882	114.961	11.9214	0.1037
G5319	126.866	99.2873	27.579	0.27777
G20687	126.862	39.9117	86.9504	2.17857
G24561	126.597	116.973	9.62433	0.0822785
G31844	126.474	111.175	15.2994	0.137616
G25030	126.468	81.1144	45.3531	0.559125
G21650	126.352	96.1697	30.1826	0.313847
G33462	126.304	113.65	12.654	0.111341
G8398	126.287	94.7464	31.5407	0.332896
G4184	126.245	96.1613	30.0839	0.312848
G16075	126.244	59.2818	66.9621	1.12956
G20545	126.222	121.769	4.45351	0.0365736
G511	126.133	61.6185	64.5143	1.047
G31607	126.122	80.0489	46.073	0.575561
G19531	125.995	99.2912	26.7042	0.268948
G18115	125.913	81.4125	44.5004	0.546605
G11416	125.844	58.9144	66.9299	1.13605
G4875	125.743	32.8254	92.9181	2.83067
G8673	125.694	95.8043	29.8897	0.311987
G10065	125.357	102.766	22.5911	0.219831
G6804	125.306	87.2539	38.0518	0.436104
G25519	125.21	98.4503	26.7595	0.271807
G19750	125.2	66.1934	59.0067	0.89143
G20576	125.197	66.8454	58.3514	0.872931
G14851	125.122	88.6496	36.4724	0.411423
G11908	125.112	59.3319	65.7799	1.10868
G32400	124.946	36.1684	88.7781	2.45458
G25009	124.92	45.9418	78.9779	1.71909
G20462	124.775	89.1861	35.5887	0.399039
G1193	124.754	36.566	88.1881	2.41175
G33158	124.709	75.2209	49.4886	0.65791
G31755	124.567	107.217	17.3504	0.161826
G7129	124.258	69.1612	55.0972	0.796648
G28854	124.229	65.5965	58.6322	0.893831
G28981	124.026	83.6522	40.3735	0.482635
G3108	124.024	83.0888	40.9355	0.492672
G24131	123.972	111.238	12.7338	0.114474
G9457	123.926	64.7972	59.1291	0.912525
G24731	123.906	115.355	8.55157	0.0741328
G18169	123.807	57.7818	66.0249	1.14266
G33460	123.791	115.458	8.33339	0.072177
G6147	123.676	87.0095	36.6662	0.421404
G30954	123.627	58.2116	65.4157	1.12376
G33788	123.588	84.7372	38.8504	0.458481
G33048	123.48	104.928	18.5515	0.176802
G25377	123.419	50.8292	72.5899	1.42811
G36384	123.23	111.971	11.259	0.100553
G9311	123.156	82.8919	40.2644	0.485746
G14248	123.03	90.9866	32.0431	0.352174
G13889	122.77	109.988	12.7812	0.116205
G2590	122.701	118.807	3.89357	0.0327722
G24214	122.629	115.509	7.12064	0.061646
G17213	122.594	36.4163	86.1772	2.36645
G25324	122.589	116.106	6.48239	0.0558316
G24274	122.554	109.564	12.9903	0.118563
G14434	122.47	39.755	82.7149	2.08062
G14818	122.341	56.4272	65.9135	1.16812
G9068	122.259	105.888	16.3712	0.154609
G19085	122.232	80.3661	41.8658	0.520938
G29799	122.141	112.731	9.40952	0.0834688
G12778	121.994	84.393	37.6013	0.44555
G24475	121.977	61.0097	60.9677	0.999312
G12068	121.946	66.8597	55.0858	0.823902
G16791	121.914	68.9587	52.9556	0.767932
G35365	121.911	87.7877	34.1238	0.388708
G16781	121.856	93.1723	28.6832	0.307851
G25353	121.798	106.224	15.5744	0.146619
G5165	121.771	24.32	97.451	4.00703
G33111	121.638	71.976	49.6624	0.689985
G28191	121.589	108.665	12.9236	0.118931
G6038	121.457	80.4701	40.9868	0.509342
G21902	121.434	86.1324	35.3013	0.40985
G6456	121.415	104.312	17.1031	0.163961
G35948	121.414	46.5204	74.894	1.60992
G33328	121.36	106.92	14.4399	0.135053
G12360	121.124	78.8608	42.2633	0.535922
G24917	121.069	62.4489	58.6201	0.938689
G24095	120.744	98.4261	22.3176	0.226745
G26436	120.72	64.0718	56.6478	0.88413
G12902	120.624	29.355	91.2691	3.10915
G21263	120.602	91.9928	28.6091	0.310993
G26933	120.566	87.923	32.6428	0.371266
G9859	120.528	43.6026	76.9259	1.76425
G25171	120.494	90.5951	29.8994	0.330033
G32861	120.43	72.3325	48.0976	0.664952
G4896	120.425	108.393	12.0316	0.110999
G27340	120.394	94.9209	25.4728	0.268358
G27163	120.257	67.8863	52.3702	0.77144
G21679	120.243	97.1846	23.0583	0.237263
G33294	120.091	60.8014	59.2896	0.975136
G13948	120.076	32.9217	87.1539	2.64731
G5360	119.857	95.6241	24.2327	0.253417
G538	119.814	77.1471	42.667	0.553061
G7132	119.766	104.819	14.9472	0.1426
G22699	119.679	110.457	9.22195	0.0834888
G6230	119.667	87.3055	32.3613	0.370667
G3298	119.633	101.002	18.6305	0.184456
G20265	119.628	106.987	12.641	0.118154
G6819	119.599	113.876	5.72242	0.0502512
G31642	119.491	105.88	13.6111	0.128553
G16550	119.448	55.4089	64.0389	1.15575
G8912	119.447	44.6313	74.816	1.67631
G7735	119.389	108.167	11.2223	0.10375
G12074	119.314	100.311	19.0034	0.189445
G13499	119.3	49.796	69.5043	1.39578
G3354	119.214	95.1257	24.0885	0.253228
G19087	119.156	44.8639	74.2918	1.65594
G15831	119.101	101.374	17.7267	0.174864
G32885	119.02	59.5171	59.5031	0.999766
G29854	118.906	116.724	2.18169	0.0186909
G32886	118.756	82.9621	35.7934	0.431442
G21730	118.705	80.9325	37.7728	0.46672
G36582	118.664	91.2118	27.4519	0.300969
G16255	118.635	89.0183	29.6169	0.332706
G19091	118.632	89.0667	29.5648	0.33194
G28182	118.57	50.5328	68.0375	1.3464
G19674	118.566	107.304	11.262	0.104953
G2147	118.545	80.2272	38.318	0.477619
G34588	118.412	102.773	15.6387	0.152167
G32656	118.325	46.8469	71.4777	1.52577
G26953	118.321	110.747	7.57403	0.0683906
G21691	118.306	94.242	24.0644	0.255346
G24023	118.125	75.2869	42.8379	0.568995
G28496	118.103	64.0538	54.0488	0.843803
G35600	118.01	87.1712	30.8391	0.353776
G30065	117.974	93.0757	24.8981	0.267504
G28327	117.968	45.2825	72.6855	1.60516
G19826	117.924	82.5578	35.3662	0.428381
G24495	117.914	116.783	1.13071	0.00968211
G19095	117.878	110.685	7.19285	0.0649847
G33173	117.791	78.0883	39.703	0.508437
G5566	117.782	63.8892	53.8929	0.843536
G1147	117.718	74.9083	42.8099	0.571498
G22796	117.544	94.9403	22.6033	0.23808
G1462	117.519	71.3131	46.2058	0.647929
G13461	117.479	86.2392	31.24	0.362249
G24560	117.337	98.3844	18.9526	0.192638
G21313	117.297	100.19	17.1071	0.170746
G18522	117.236	53.3802	63.8557	1.19624
G9671	117.169	109.71	7.45891	0.0679875
G10278	117.139	111.282	5.8571	0.0526331
G10241	117.126	66.1462	50.9795	0.770709
G24570	117.09	105.812	11.2774	0.106579
G21818	116.874	104.094	12.7798	0.122772
G14366	116.81	92.6956	24.1143	0.260145
G9100	116.627	69.7563	46.8702	0.671914
G36332	116.567	101.271	15.2951	0.151031
G4832	116.5	31.9646	84.5351	2.64465
G32864	116.472	83.8692	32.6028	0.388734
G16192	116.347	76.0699	40.2771	0.529475
G11432	116.3	103.32	12.9805	0.125633
G32572	116.2	82.4441	33.7556	0.409436
G13930	116.181	104.301	11.88	0.113901
G36177	116.04	85.4165	30.6236	0.358521
G28350	116.031	109.592	6.43908	0.0587549
G29051	115.983	95.4154	20.5674	0.215557
G15843	115.866	99.1524	16.7136	0.168564
G20160	115.724	112.495	3.22896	0.0287032
G1768	115.709	62.99	52.7191	0.836944
G26664	115.671	30.8999	84.7712	2.74341
G23114	115.63	91.0469	24.5826	0.27
G33815	115.54	100.615	14.9247	0.148334
G17643	115.471	39.9467	75.5238	1.89061
G12969	115.392	98.4089	16.9834	0.17258
G4964	115.385	110.558	4.82705	0.0436607
G18154	115.373	15.0624	100.31	6.65964
G19562	115.335	103.712	11.6235	0.112075
G20004	115.288	61.9216	53.3669	0.861847
G6321	115.144	70.0117	45.132	0.644634
G23802	115.119	109.39	5.72939	0.052376
G10531	114.999	66.0209	48.9782	0.741858
G22740	114.743	51.7731	62.97	1.21627
G876	114.651	56.624	58.0275	1.02479
G36125	114.553	99.2499	15.3032	0.154189
G10582	114.415	99.3262	15.0887	0.151911
G6920	114.408	60.8281	53.5794	0.880832
G3460	114.386	47.032	67.3544	1.4321
G26690	114.143	95.5727	18.5707	0.194309
G25682	114.131	93.2111	20.9201	0.224437
G36057	113.951	79.0221	34.9284	0.442008
G21196	113.942	32.4143	81.5274	2.51517
G35671	113.908	62.7779	51.1304	0.814465
G4610	113.817	100.141	13.6757	0.136565
G14387	113.783	52.1825	61.6004	1.18048
G10407	113.738	41.0063	72.732	1.77368
G36709	113.716	59.9483	53.7679	0.896905
G6991	113.695	44.9991	68.6956	1.5266
G35044	113.485	109.472	4.01304	0.0366582
G29820	113.471	94.9504	18.5205	0.195055
G21993	113.343	58.6637	54.6797	0.932088
G4503	113.298	48.173	65.1253	1.3519
G34444	113.256	69.8009	43.4548	0.622553
G29796	113.245	90.9351	22.3097	0.245337
G10280	113.184	86.7334	26.4509	0.304968
G10568	113.129	99.3906	13.7382	0.138224
G32866	113.1	44.6302	68.4701	1.53417
G7521	112.964	42.4052	70.5589	1.66392
G23411	112.652	55.709	56.9426	1.02214
G11993	112.632	72.543	40.089	0.552625
G21925	112.582	77.7899	34.7925	0.447262
G11553	112.568	103.846	8.72171	0.0839867
G16875	112.426	67.2076	45.2183	0.672815
G17500	112.348	30.7318	81.6162	2.65576
G23712	112.297	108.589	3.70739	0.0341414
G24262	112.2	98.6343	13.5654	0.137532
G31342	112.19	91.7566	20.4338	0.222695
G8500	111.835	101.377	10.4574	0.103154
G3099	111.81	56.1272	55.6826	0.99208
G29564	111.714	97.1902	14.5235	0.149434
G689	111.582	45.1559	66.426	1.47104
G36005	111.576	105.419	6.15677	0.0584027
G23153	111.541	91.1149	20.4261	0.22418
G14560	111.534	73.2985	38.2351	0.521635
G24058	111.442	96.1587	15.2835	0.158941
G4289	111.438	55.2032	56.235	1.01869
G28152	111.365	94.0661	17.2992	0.183905
G17546	111.277	106.199	5.07845	0.0478203
G21611	111.25	50.0407	61.2091	1.22318
G4362	111.241	78.7239	32.5173	0.413055
G14467	111.174	81.5337	29.6404	0.363536
G4973	111.171	107.285	3.88596	0.0362208
G12123	111.117	53.714	57.4034	1.06869
G20296	111.05	55.4963	55.5534	1.00103
G29332	111.047	97.539	13.5079	0.138487
G16368	111.033	84.3858	26.6474	0.315781
G17727	111.02	22.8566	88.1636	3.85725
G35156	110.861	53.607	57.2544	1.06804
G19817	110.82	78.1708	32.6488	0.41766
G18260	110.795	45.7618	65.0335	1.42113
G6609	110.79	103.374	7.41655	0.071745
G3722	110.778	96.7786	13.9992	0.144651
G35380	110.763	56.9086	53.8539	0.946323
G33840	110.637	40.5335	70.1037	1.72952
G26760	110.624	32.5117	78.1121	2.40258
G11641	110.605	100.656	9.94819	0.0988332
G660	110.595	50.2855	60.3099	1.19935
G6140	110.541	105.66	4.88097	0.0461949
G16296	110.529	50.2619	60.267	1.19906
G19301	110.418	88.8648	21.5537	0.242545
G36650	110.341	90.5224	19.8182	0.218931
G14329	110.311	60.2499	50.061	0.830889
G10414	110.275	42.2495	68.0255	1.61009
G14569	110.253	61.9881	48.2654	0.778624
G33438	110.198	98.5877	11.6104	0.117767
G17522	110.175	48.6343	61.5411	1.26538
G21923	110.161	30.4199	79.7406	2.62133
G33900	110.004	58.4033	51.601	0.883528
[truncated: 7,114 more rows]
